# Supplementary material for: Genome-wide characterization and expression profiling of the HD-ZIP gene family in Acoraceae under salinity and cold stress
Source: Front Plant Sci. 2024 Apr 26;15:1372580. doi: 10.3389/fpls.2024.1372580 (PMC11082295; doi:10.3389/fpls.2024.1372580)
Supplement: Supplementary file 1 [file DataSheet_1.xlsx]

## Sheet: Ac. gramineus
>DACA022171 locus=Chr02:2486221:2491454:+ [translate_table: standard]
MAKVVMDSGKYVRYTPEQVEALERVYMECPKPSSMRRQQLIMDCPILSNIEPKQIKVWFQ
NRRCREKQRKEASRLQTVNRKLTAMNKLLMEENDRLQKQVSHLVYENGYMKHQIRTAPVP
TTDNSCESVVTGGQHQQNPTPQHPQRDANNPAGLLAIAEETLAEFLSKATGTAVDWVQML
GMKPGPDSIGIIAVSHNCSGVAARACGLVSLEPTKVAEILKDRPSWYRDCRCVDVLTAIP
TGNGGTIELIYMQTYAPTTLATARDFWTLRYTTGLEDGSLVICERSLTSSTGGPTGPPAP
TFVRAEMLPSGYLIRPCDGGGSIIHIVDHVDLDALSVPEVLRPLYESSKILAQKMTIAAL
RHIRQIAQENSGEINHGGGRQPAVLRTFSQRLSRGFNDAVNGFVDDGWSLLGSDGVEDVT
IAINSSPGKLFGAHGNSSAMFSTFGGGVLCAKASMLLQNVPPALLVRFLREHRSEWADCS
VDAYSAASLKSGAYAVPGARIGGSGFLGSQVILPLAHTVEHEEFLEVIRLDGHGFMQDDA
IMSRDMYLLQLCSGVDENAAGACAQLVFAPIDESFADDAPLLPSGFRVIPLEPKSDGPGA
TRTLDLASALDVGPGGAARSAGENTTGSSYNLRSVLTIAFQFTYENHLRENVAAMARQYV
RSVVGSVQRVAMAISPSRAGPQIGGPKSLPGSPEALTLARWITRSYRFHTGVDLLRSESQ
SGDALLKQLWHHSDAIMCCSLKPNVPIFTFANQAGLDMLETSLIALQDITLEKVLDEGGR
KAFCAEFGKIMQRGYTYLPGGICASSMGRPVTYEQAVAWKVVDEEENSHCLAFMFINWSF
V
>DACA015342 locus=Chr07:24317952:24325668:- [translate_table: standard]
MAMVVAPRNNGSAVGSISGCGDKNSDSGKYVRYTAEQVEALERVYAECPKPSSMRRQQLI
RECPILSNIEPKQIKVWFQNRRCREKQRKEASRLQTVNRKLNAMNKLLMEENERLQKQVS
QLVYENGYMRQQLQSASLATDTTCESVVTTPHHSLRDANNPTGLLSIAEETLAEFLSKAT
GTAVDWVQMPGMKPGPDSTGIVAISHSCSGVAARACGLVSLEPTKIAEILKDRPSWFRDC
RSLEVFTMFPAGNGGTVELVYMQMYAPTTLAPARDFWTLRYTTGLEDGSLVVCERSLSGS
GGGPSASTAHQFVRAEMLPSGYLIRPCEGGGSIVHIVDHVDLEAWRVPEVLRPLYESSKV
VAQKLTIAALHHIKQIAQEISGEVVYNLGRQPAVLRTFSQRLSRGFNDAINGFIDDGWSL
LDCDGVEDVIISTNSSKCMGTSVNPGNPLAMSGGVLCAKASMLLQNVPPALLVRFLREHR
SEWADYSIDAYSAASLKAGLCAFPGSRSSGFSGSQIIIPLAHTVEHEEFLEVIRLEGQSI
TQDDAILSRDVHLLQLCSGMDENAVGACFQLVFAPIDELFPDDAPLLPSGFRVISLDSKA
DDITAHRTLDLASSLETGSAANRADGDGVPSTSGHRSVLTIAFQFPYEAHLQDSVAVMAR
QYVRSVISSVQRVSMAISPSRLGGHMGSKLSPGSPEALTLARWICQSYSFHMGVELLSTD
CQTGDSMLKSLWHYPDAILCCSLKALPVFTFANQAGLDMLETTLVALQDIALDKIFDEAG
RKTLCSEFSKIMEQGYSYLPAGLCISSMCRNISYEQAIAWKVLDEDGSVHCLAFSFVNWS
FV
>DACA002429 locus=Chr11:16707398:16716252:- [translate_table: standard]
MAMVVAPRGNGSDAGGMSGFADKNSDSGKYVRYTVEQVEALERVYTECPKPSSMRRQQLI
RECPILSNIEPKQIKVWFQNRRCREKQRKESSRLQTVNRKLNAMNKLLMEENERLQKQVS
QLVYENGSMRQQLQGASLVTDTSCESVVTTPQHSLRDANNPTGLLSIAEETLAEFLSKAT
GTAVDWVQMPGMKPGPDSTGIVAISHSCSGVAARACGLVSLEPTKIAEILKDRPSWFRDC
RSLEVFTMFPAGNGGTVELIYMQMYAPTTLAPARDFWTLRYTTGLEDGGLVVCERSLSGS
GGGPSASTAHQFVRAEMLPSGYLIRPCEGGGSIVHIVDHVDLEAWRVPEVLRPLYESSKV
VAQKLTIAALHHIRQIAQETNGEVVYGLGRQPAVLRTFSQRLCRGLNEAINGFTDDGWSL
LACDGVEDVIISTNSSNCMGTHVTPGGSLAMSGGILCAKASMLLQNVPPALLVRFLREHR
SEWADYSIDAYSAASLKAGLCAFLGSRSTGFSGSQTIIPLAHTVEHEEFLEVIRLEGQSI
TQDEAVLSRDVHLLQLCSGLDENAVGACFQLVYAPIGEFFPDDAPLLPSGFRVISLDSKT
DKAAHRTLDLASSLEVGSAANRTDGDVVPSNSHHRSVLTIALQFPYETHLQDSIAAMARQ
YVRSIISSVQRVSMAISPSKLGGHWGSKLSPGSPEALTLTHWICQSYSFHMGVELLTDCQ
SGDSMLKNLWHHQDAILCCSLKALPVFTFANQAGLDMLETTLVALQDIALDKIFDESGRK
TLCSEFSKIMEQGYSYLPAGVCMSSMGRNVSYEQAVAWKVLNEDSSVHCLAFSFINWSFV
>DACA015668 locus=Chr08:11066706:11074546:- [translate_table: standard]
MMAVASCKEGKGGLDNGKYVRYTPEQVEALERFYHECPKPSSIRRQQLIRDCPILSNIEP
KQIKVWFQNRRCREKQRKEASRLQAVNRKLTAMNKLLMEENDRLQKQVSQLVYENGCFRQ
QTLNTALPTTDTSCESVVTSGQHHLATQRPPRDASPAGLMSIAEETLTEFLSKATGTAVE
WVQMPGMKPGPDSIGIIAISHGCPGVAARACSLVGLEPTRVAEILKDKPSWFRDCRSVDV
INVLPTTNGGTIELLYMQLYAPTTLAPARDFWLLRYTSILDDGSLVVCERSLSNTQGGPS
MPLVQPFSRAEMLPSGYLIRPCDGGGSIIHIVDHMDLEPWSVPEVLRPLYESSTVLAQKT
TLAALRHLRQITHEVTNSNNTGWGRQPVALRALSQRLSRGFNEALNGFTDEGWSLMGNDG
IDDVTILVNSTPNKMLGVNLAFANGFPSVNTSVMCAKASMLLQNVPPAMLTRFLREHRSE
WADCNIDAYSAAVVQSIPCTLPGSRIGSFGGQVVLPLAHTVEHEEFLEVLKLENISHFQD
SIVSRDLFLLQLCSGVDENAVGTCSELIFAPIDASFADESPLLPSGFRIIPIDIGADASS
PNRTLDLASALEIGSTGNRLSGDCSGSSGNMRSVMTIAFQFAFENHLQESVTSMARQYVR
SIISSVQRLALALSPSHLSSYAGLYPPSGSPEALTLARWICRSYRGHLSEELLKPSNESG
ESILKTLWHHSDAIMCCSLKMLPVFTFANQAGLDMLETTLVALQDITLEKIFDDNGKKTL
CNEFPQILQQGFTCLQGGVCLSSMGRPVSYERAVAWKVSNEEDIAHCICFMFVNWSFM
>DACA002672 locus=Chr07:12662273:12669644:- [translate_table: standard]
MMAVTSCKEGKGGLDNGKYVRYTPEQVEALERLYHECPKPSSIRRQQLIRDCPILSNIEP
KQIKVWFQNRRCREKQRKEASRLQAVNRKLTAMNKLLMEENDRLQKQVSQLVYENGYFRQ
QTQNTALATTDTSCESVVTSGQHHLTPQHPPRDASPAGLMSIAEETLAEFLSKATGTAVE
WVQMPGMKPGPDSIGIIAISHGCPGVAARACGLVGLEPTKVAEILKDRPSWFRDCRSVDV
INVLPTANGGTIELLYMQIYAPTTLAPARDFWLLRYTSILDDGSLVVCERSLSNTQGGPS
MPLVQPFARAEMLPSGYLIRPCEGGGSIIHIVDHMDLEALRHLRQISHEVTHSNNTGWGR
QPVALRALSQRLSRGFNEALNGFTDEGWSLMGNDGIDDVTILVNSSPSKMLGVNLAFANG
FPTVNTSVLCAKASMLLQNVPPAVLVRFLREHRSEWADCNIDAYSASVVQSIPCTLPGSR
IGSFGGQVVLPLAHTLEHEEFLEVLKLENISHFQDTIVPRDLFLLQLCSGVDENAVGNCA
ELIFAPIDASFADDAPLLPSGFRIIPLDIGSDPSSPNRTLDLASALEVGSNGNRISGDSL
GNGGNMRSVMTIAFQFAFENQMQENVASMARQYVRSIISSVQRVALALSPSRLGSSPGFC
PPLGSPEALTLARWICCSYRCHLGAELLKPSNEGGESILKTLWHHSDAIMCCSLKVLPVF
TFANQAGLDMLETTLIALQDITLEKIFDDHGRKTLCNEFPQIMQQGFACLQGGVCLSSMG
RPVSYERAVAWKVLNEEENAHCICFMFVNWSFV
>DACA025095 locus=Chr52:553692:557879:+ [translate_table: standard]
MSPPHLSKPTFSSPALSLALQPTTGGVVGGGSGGAGGVGGGGSGSGDFDSVGRNREEEYE
SRSGSDNVDGGSGDEQDPNQPPSKKKRYHRHTPQQIQELESLFKECPHPDEKQRLELSRR
LNLESRQVKFWFQNRRTQMKTQLERHENQILRNENDKLRAENMSIRDAMRNPICTNCGGP
ALLGEVSLEEQHLRIENARLKDELDRVCTLAGKFLGRPISTLAHHPERQVFLELALAAMD
ELLKMAHGEDPLWMRSLDGGRETLNYEEYLRVFPRCIGVKPVGFATEATRETGLVIINGL
ALVETLMDANRWEDMFPTMVSRASTTDVISNGMGGTRNCSLQLMHAEFQVLSPLVPVREV
NFLRFCKQHTQDIWAVVDISIDCLVECRRLPSGCVIQDMPNGYSKVTWVEHAEYEENGVH
HLYRNLLCSGMAFGAQRWVATLQRQCECLAILMSSIPTRDHNVSAITPNGARSMLKLAQR
MTDNFCKGVCASTVHKWEKLTTSNTSSPLGADIRVMTRQSVNDPGEPAGVVLSAATSVWL
PVPPVRIFDFLRDERLRSDWDILSNGGPMHEMTHIAKGQEHGNCVSLLRASAMSPDQTGM
LVLQETCIDSSGALVVYAPVDIPAMHLVMNGGDSSYVALLPSGFAIVPDGPARDGNNHNS
NGGGGGSLLTIAFQILVNNLPMPKLNAESVDTVNNLINCTVQKIKAAIHGDS
>DACA010840 locus=Chr04:24213209:24217283:- [translate_table: standard]
MSFGGFVDSGHKPIFTSPGLSLALQTSMDGVLVHRQSGDFDFGGPNREEEYESRSGSDNI
EGGSGDELDPDQSPSKKKKRYHRHTPQQIQELEALFKECPHPDEKQRLELSRRLSLETRQ
VKFWFQNRRTQMKTQLERHENSILRHENDKLRAENMSIRDTMRNPICTNCGGPALLGEVS
LEEQHLRLENARLKDELDRICALAGRFIGKPVSAHLGAHHPPMPSSSLELGVGSGTNGFG
VPGQVPGSFNVPFGVDRSVFLELALAAMDELVKMAQEREPLWVPGLYGGRETLNYEEYLR
MFPRCIGVRPMGFATEATRDTGLVIINGVALVETLMDANRWADMFPAMISRTSTTDVISS
GMGGTRNGALQLMHAELQVLSPLVPVREVNFLRFCKQHSEDIWAVVDISIDGLCDSVAAV
NCRRLPSGCLIQDMPNGYSKVTWVEHSEYDENEAHQLYRNLLSSGICFGAQRWVATLQRQ
CECLTILMSSIPTREHTAITPNGRRSMLKLAQRMTDNFCAGVCASTVHKWDKLSTNSSSP
LGADVRVMTRRSVNDPGEPPGVVLSAATSVWLPIPPARLFNFLRNERLRSEWDILSNGGP
MQEMAHIAKGQDHGNCVSLLRASAISPDKSSMLILQETCIDASGALVVYAPVDIPAMNVV
MNGGDSAYVALLPSGFAVLPDGPARNKNDDDGNAEGGSLLTVAFQILVNSLPMAKLNVES
VETVNNLISCTVQKIKSAIHCDS
>DACA018179 locus=Chr01:14603431:14609298:+ [translate_table: standard]
MPAGIMTPAGHMPPMMGRNGKFVAGYGSSGLSLNQPNLMEGQQHQLHHQLEITQTPESEM
AKIRGEEDFECKSGSENLEGASGDDQDPNQRPNKKKRYHRHTQHQIQEMEAFFKECPHPD
DKQRKELSRELGLEPLQVKFWFQNKRTQMKTQHERHENTQLRTDNDKLRAENMRYKEALS
NASCPNCGGPAALGEMSFDEHHLRIENARLREEIDRISGIAAKYVGKPIGSYPLLSPSIS
ARSPLDLGVGNYGVQPGIGGEMFGAGELLRSVSGQPEIEKPMVIELAVAAMEELVRMAQI
GEPLWVPGLDNPMEILSEEEYVRTFPRGIGPRPFGLKSEASRETAVVIMNRINLVEILMD
VNQWSTVFSGIVSRAMTLEVLSTGVAGNYNGALQVMTAEFQVPSPLVPTRESYFVRYCKQ
HTDGTWAVVDVSLDSLRPSPVLRCRRRPSGCLIQEMPNGYSKVTWVEHVEVDDRAVHNIY
RLLVNSGLAFGAKRWVATLDRQCERLASVMASNIPAGDIGVITSQEGRKSMLKLAERMVI
SFCSGVSASTAHTWTTLSGSGAEDVRVMTRKSIDDPGRPPGIVLSAATSFWLPVPPKRVF
DFLRDENSRNEWDILSNGGVVQEMAHIANGRDHGNCVSLLRVNSSNSNQSNMLILQESCT
DTWGSFVIYAPVDIVAMNVVLNGGDPDYVALLPSGFAILPDSPATANNGGAITEVGTGGS
LLTVAFQILVDSVPTAKLSLGSVATVNSLIACTVDRIKAAVSGENA
>DACA018089 locus=Chr11:2157606:2162912:+ [translate_table: standard]
MPTGIIIPAGHMPLMMGRTGKIVAGYGSSGLSLSQPNLLEGQQHQLQHHQQPEFMQTPES
IDMAKIRGGEDDFESKSGSENLEGASGDDQDLNQRPKKKRYHRHTQHQIQEMEAFFKECP
HPDDKQRKELGRELGLEPLQVKFWFQNKRTQMKTQHERHENSQLRADNDKLRAENMRYKE
ALTNASCPNCGGPAALGEMSFDEHHLRIENSRLREEIDRISAIAAKYVGKPMASYPLLSP
SISSRSPLDLGFGVQPGIGGEMFGVGELLRSVSGQPEFEKPIVVELAVAAMEELVRMAQL
GEPLWVPSLDNPMEILSEDEYIRTFPRGIGPRQFGLKSEASRETAVVLMNHINLVEILMD
VNQWSTMFSGIVSRAMTLEVLSTGVAGNYNGALQVMTAEFQVPSPLVPTRESYFVRYCKQ
HADDTWAVVDVSLDNLRPSPVLRCRRRPSGCLIQEMPNGYSKVTWVEHVEIDDRAVHNIY
RLLVNSGLAFGAKRWLATLDRQCERLASVMATNIPAGDIGVITSQEGRKSMLKLAERMVI
SFCSGVSASTAHTWTTLSGSGAEDVRVMTRKSIDDPGRPPGIVLSAATSFWLPVPPKRVF
NFLRDENSRNEWDILSNGGIVQEMAHIANGRDHDNCVSLLRVNSANSNQSNMLILQESCT
DSSGSFVIYAPVDVVAMNVVLNGGDPDYVALLPSGFAILPDSPPAATTTNTVGTITEVGT
GGSLLTVAFQILVDSVPTAKLSLGSVATVNSLIACTVDRIKAAVTTGDNA
>DACA015341 locus=Chr07:24309785:24310846:- [translate_table: standard]
MGLSKSPLSLGLLVALFVGFAVYFRLQEIDSAFAFEEDLLSIDCLRSGEDTMLKNLWDSR
DAILCCSLKAGFDMVERLEELHDMFLDETLDPKMLCSEFSDIIEQGKSYFGGWT
>DACA020352 locus=Chr10:503444:504689:- [translate_table: standard]
MNNYKEMGFPFSNQQATRIVGDGRNGGVLGNYSFNIGVTDVDYDGLSGSGSTGDSITGFT
AININSKNDDNNYQRYTKEQIEVLQNIFDRCPNPDEKERRELSQLLKLSKSQIKFWFQNR
RSYMKIQMERQENSLLKEENERIRKENEALIERMSKHICSNCRGDNGESSSLLLFESSMQ
ELQLREENACIGKEIQQLITQIEIKSREALPIPMGHVPPQHQSGVTSSHNINIATNDLGL
INIINAPVGNANFTSGGFIGPSSSSAFRLVTPQHSPTTTSEFVKDSSGSSSTEPLAGQPP
NMDDLATERVSTTDGWLGAMTRSGGSCSES
>DACA008865 locus=Chr10:9714453:9720437:+ [translate_table: standard]
MYGDCQVMSSLGGGNMITSSDGLFTSPSPIRNPDHLGFLSSMPFHHHFPSLIPKEEMGVG
VLGLGKEEDIMESGGSGSGHLDGLSCGEEHDNDKLNHHPKPQLENPQSKKKRYHRHTARQ
IQEMEALFKECPHPDDKQRMRLSQDLGLKPRQVKFWFQNRRTQMKAQQDRSDNVVLRAEN
ENLKNENFRLQAAIRNVVCPNCGGPAALGEMTFDEQHLRLENARLKDELERLSCIASRYG
HRSVQPLGSTPPWLIPSLDLDMGMYTRHFNDPMGDMISALPPPPPPMPDSPYPTFLIMDQ
EKHSALELAMTAMDELVRMCHMNEPLWTRSGDEEVLDLEEHAKMFPPWPMDLKPVNHDEF
RTEATRDSALVIMNSITLVDAFMDANKWVELFPSIVSKARTIQIISPGVSGLVNGSLHLM
YAEFQVLSPLVPTRETHFLRYCQQNIEAGTWTVVDFPIDGFHDVVQLSSTGYRRRPSGCV
IQDMPNGYSRVTWVEHAEIENKQVHPIFQQFVHSGSAFGAHRWLSVLQRQCERLASLMAK
NISNLGVIPTPEARKNMMKLAQRMVRTFCSNMSTSDEVQSWTSLSDSPEDTVRVMTRKTT
EPGQPNGVILTAVSTTWLPFTHHQLDILSSGNSLHEVAHIANGSHPRNCVSLLRINAASN
SSQNVELMLQESSTHPTGGSLIVYATVDVDAVQVAMSGDDPSFIPLLPMGFVVLPASASP
ATADNNNNEGGGADISTKPSMDGCLLTAALQVVASAVPSAKLNLSSVTAINNHLCSAVQQ
ISAALGSGGTTAAAGGGASEALKAEP
>DACA020351 locus=Chr10:543702:547889:+ [translate_table: standard]
MSPPHLSKPTFSSPALSLALQTNNMEGLLVHQQPTTGGVVGGGSGGAGGVGGGGSGSGDF
DSVGRNREEEYESRSGSDNVDGGSGDEQDPNQPPSKKKRYHRHTPQQIQELESLFKECPH
PDEKQRLELSRRLNLESRQVKFWFQNRRTQMKTQLERHENQILRNENDKLRAENMSIRDA
MRNPICTNCGGPALLGEVSLEEQHLRIENARLKDELDRVCTLAGKFLGRPISTLAHHPPM
PNSSLELGVGGANGFGGLGHITGPMPSISDFMPGSGGSVAPNSTSVVPVASERQVFLELA
LAAMDELLKMAHGEDPLWMRSLDGGRETLNYEEYLRVFPRCIGVKPVGFATEATRETGLV
IINGLALVETLMDANRWEDMFPTMVSRASTTDVISNGMGGTRNCSLQLMHAEFQVLSPLV
PVREVNFLRFCKQHTQDIWAVVDISIDCLRDNPAAVECRRLPSGCVIQDMPNGYSKVTWV
EHAEYEENGVHHLYRNLLCSGMAFGAQRWVATLQRQCECLAILMSSIPTRDHNAITPNGA
RSMLKLAQRMTDNFCKGVCASTVHKWEKLTTSNTSSPLGADIRVMTRQSVNDPGEPAGVV
LSAATSVWLPVPPVRIFDFLRDERLRSDWDILSNGGPMHEMTHIAKGQEHGNCVSLLRAS
AMSPDQTGMLVLQETCIDSSGALVVYAPVDIPAMHLVMNGGDSSYVALLPSGFAIVPDGP
ARDGNNHNSNGGGGGSLLTIAFQILVNNLPMPKLNAESVDTVNNLINCTVQKIKAAIHGD
S
>DACA017212 locus=Chr02:15648176:15651151:+ [translate_table: standard]
MYFPFSASPVYGDQWVLNNNNNGDRSSNPSGPAMDSGEDPDALEAHRNKKKRHHRHTARQ
IQELESMFKECPHPDEKQRMQLSRDLGLEPRQIKFWFQNRRTQMKAQHERADNCVLRSEN
DKIRCENIAMREALKNIICPSCGGPPLGEDSYFDEQKLRMENARLKDEFFLCSAKLERVS
TMASKYVGRPISHLPPVQPIPISSLDLSVGSHHSICCGGGGGGGHTMMGLSPPSLDLDLL
HGSSSSAPALHVPPSMGMTEMEKSLMAEMASAALDEAVRLLRADEPFWVRRGGDGGEVLD
LDSYSRAFSKLGPAKSPDVRVEASRDSGLVLMSAHALIDMFMDSAKWAEMFPTIVLKART
IEVLTTGVGGNRSGSLMLMNEELQVLSPLVETREFNFLRCCQRIEPGLWAIADVSVGLSS
RETARSAYRKLPSGCLIQEMPNGHSKVTWMEHMEMDERTLPHRLYRELLISGLAFGAERW
LANLRRMCERFASLTLTGTSTRELGVIPSAEGKRSMMKLSHRMISNFCASISASNGDRWT
ALSGSDDIGVRVTVHKSTDPGRPNGVVLSAATSLWLPVPCQNVFNFFKDERTRAQWDVLS
NGSSVQEVAHIANGSHPGNCISLLRAFNASENNMLILQESCTDASGSLVVYAPVELPAIN
VAMSGEDPSNIPLLPSGFTIAPDGRAPDSSASTSLSHNGGRGGGSLITVAFQILVSSLPS
AKLNAESVNTVNNLISTTVQQIKAGLNCNT
>DACA021755 locus=Chr09:9598434:9601733:- [translate_table: standard]
MYFPFNASPVYGDEWVLNNNNNNNRSTRNANNIINNNSDRPTISTGAAMDSGEDPDAPDT
NRNKKKRHHRHTAHQIQELESMFKECPHPDEKQRMQLSRDLGLEPRQIKFWFQNKRTQMK
VSEAQHERSDNCSLRSENDKIRCENIAMREALKNVICPSCGGPPLGEDSYFDEQKLRMEN
ARLKEEVSLCFLQNSVFLERVSSIASKYIGRPISQLPPVQPIPISSLDLSVATGLTEMEK
SLMAEMAAAALEEAVRLLQADEPFWVKNSSDGREVLDLDSYLRAFPKKSPDVRVEASRDS
GLVIMNTLALVDMFMDSAKWAELFPTIVSKARTIEIIATGMAGSRSGSLVLMSAELQVLS
PVVSTREFHFLRYCQQIEKGTWAVADVSVDFSSRENQFAAPSGSRKLPSGCLIQEMPNGY
SKVTWMEHVEIEEKTPPHRLYRELVSSGLAFGAERWLGTLQRMCERFACLMMTGTSTREL
GVIPSVEGKRSMMKLSQRMINNFCASISTSSGHRWTTLSGLNDIGVRVSVHKSTDPGQPH
GVVLSAATSLWLPVSCQNVFNFFKDERTRAQWDVLSHGNSVQEVAQITNGSHPGNCISLL
AFNASQNNMLILQESCTDSSGSMVVYAPVDLPAINITMSGEDPSYIPLLPSGFTITPDGQ
AASTSSNPSGSNRSSGGGSLITVAFQILVSSLPSAKLNVDSVTTVNNLISTTVQQIKAAL
NCPT
>DACA000928 locus=Chr10:17663768:17664732:- [translate_table: standard]
MEGQGDSNINLEKEVENGVNLELSITRACDVSNTSNNKTIAADYATLSSCNNSQKPYRHS
NAQIQALEDLYSNCPYPTKNQMMELAQRIGIDDAQVRYWFQNRHTRTKLRMEEYENKILR
EENDMIMQENMANLEFLRRHMYCSRCLNGGMTVEELRMENIWLRKELARVIAHVEDVSGQ
PILALLSVVPDETSSPPPTSSATTDDFLSLGPSNHV
>DACA000929 locus=Chr10:17659209:17661561:- [translate_table: standard]
MENMVNHNEMGLSFENHQPKGVVEAGGDKEELFGIGDLELGILMEDNDQNGPLNNNNRND
CRVHNSKNKNKKERVHRHSKEQIQILKSLYKQCPHPDEKQRKELSQLLNMKKSQIKYWFQ
NQRSYKKIKTERHDNEQLKEENDRLRIDNAIIQKKITNMVCSKCRGDDNQMSQLLSSLEC
SMRDLREEKSHMEQEIQHLQTHIDKSGGGFAGLARLQTQSSSGSSLSTNVAAAAAPIGTS
FMTGGSSSASSVVSHENALAHALRSTGQVPSMEDIVSGRISAADPWLGGRITRGGYRPKK
KSVRDVDVDGGDDE
>DACA000927 locus=Chr10:17698392:17699669:- [translate_table: standard]
MKWGMEDHGNMNINLEEDVEKGVNLELKITCEVINTHSDSVETDSHTPSSCNKQKKFLHH
SKAQIEALETFFKECPHPNEKQRIELGQRIGLDTTKVKYWFQNRRTSRIARKEWHENKIL
REENEKMKMENMVTLDVLGNPMCPRCLSEDMKMEQLKMENIRLKEELARVKAHLEEVSGQ
PGPNLAKGP
>DACA008395 locus=Chr09:5737728:5738557:- [translate_table: standard]
MEEQTCRTWLGLGLGCRSEELSVQRRKNNERKPQLQLLFPLESKSNEDEEVAKKEFRLTR
EQTSLLEERFRERNALTLNQKQELAEQLNLRPRQVEVWFQNRRARTKLKQKEVHYEFLKK
WCERLSEENRRLKREVQKLYSIKPSGWPYHEHLSKAAAALSVCPSCKRNSVTGDGKTNNN
>DACA008394 locus=Chr09:5741597:5742470:- [translate_table: standard]
MEEQTCRTWLGLGLGCRSEELSVQRRKNNERKPQLQLLFPLESKSNEDEEVAKKEFRLTR
EQTSLLEERFRERNALTLNQKQELAEQLNLRPRQVEVWFQNRRARIKLKQKEVHYEFLKE
CFKGLSEENRRLKREVYSIKPSGWPYHEHLSKAAAALSVCPSCKRNSVTGDGKTNNN
>DACA013923 locus=Chr06:12489975:12490847:+ [translate_table: standard]
MQRREDGERNPPVKLQLLFPLETKSDEDEEIAKKKFRLTREQTSLLEERFREHNFLTLNQ
KQELAEKLNLLPRQVKIWFQNRRARTKLKQKEVHYELLKKCFESLSEENLQLKRKVQELR
SIKPNGWPYHEYFSKAAAAAAQRVCPSCKRNSVSGDGRNNNNDGLDLKPNLCTAFMESPS
DMAC
>DACA006650 locus=Chr17:11045:11756:+ [translate_table: standard]
MVEINEYYSLGEEAAESGDSVDTTTAKKKSNNKGKRKNKRRFSEEQIQSLETMFESKTKL
EARQKLQLAVELGLQPRQVAIWFQNKRARWKSKQLEREYSILRAQYDALLANFESVNKEK
QSLMKQLSKMVDLLERQDLVSKDGFEGETKCVKDEAKSTASDQSGENSEWWEFWP
>DACA017499 locus=Chr09:10624920:10626582:- [translate_table: standard]
MELGLSLGDMSVPIINLGTLQNERKDENKASVEVRGFDMNELPPEEMVEAAAAASSKQIT
FFRGGDGEVEVVEMDEAFTRKKLRLSKEQSSFLEESFNENQTLNPQQKLNLAKKLNLRPR
QVEVWFQNRRARTKLKQTELKREEYKREYETLRELYERLQKEVQDLKTLKMTSPSLCMLP
PTTLIICHECHEKAAAATAAAVAPRPIQGSATTELSPVFCELSFEKVE
>DACA006946 locus=Chr06:19306094:19307032:- [translate_table: standard]
MRDNHQFDGGVGVGEHGAGLLSDDDFEAWITTLLEEDFDMTPIDFDIDDSNILENKNKRK
KYRHTKEQVQALNSVFEQCNHPNEDKIKELCEKLNMKRSQIKIWFQNRRSHLKVEMDGHQ
NLILKGENHMLQTEKRILQAKLDSQMCSKCCCNYKNELHKENATLRERIHDIHQALNGAF
LIRQPVQSYTGIGTSDPSLLSVVNGPSSLFNGLESGLSPYSTTIPIIPQGNAPQLDIIFE
SSPLAFRQGF
>DACA017378 locus=Chr36:1289000:1289710:+ [translate_table: standard]
MVEINEYYSLGEEAAESGDSVDTTTAKKKSNNKGKRKNKRRFSEEQIQSLETMFESQTKL
EPRQKLQLAVELGLQPRQVAIWFQNKRARWKSKQLEREYSILRAQYDALLANFESVNKEK
QSLMKQLSKMVDLLERQDLISKDGFEGETKCVKDEAKSTASDQSGENSEWWEFWP
>DACA022106 locus=Chr06:11266475:11267521:- [translate_table: standard]
MCEKQRHRASKTINMVHEDGLSLGLGYGGEGATTTESKLSSDGHHQKQQDLQFKHCYYEP
SLTLGRPSDDSNSVVSSFSNGVNTSAPAAVKRERDDVASEERPAVSSRVSDEDEDVGTGV
RKKLRLTKEQSAMLEDSFKEHSTLNPKQKQALAKQLNLRPRQVEVWFQNRRARTKLKQTE
MDCEILKRCCENLTDENRRLQKELQELKKIKYAPSSTPPIYMQFPAAATLSVCPSCERMI
SSTGGSGDNTKAAAPFLIAPKPTHLYGSFTNSPAAC
>DACA000653 locus=Chr07:16064301:16065225:- [translate_table: standard]
MSYEDGAGNGEDELSDEGSQMGEKKRRLNVEQVRTLEKNFELGNKLEPERKMQLARALGL
QPRQIAIWFQNRRARWKTKQLEKDYDLLKRQFDAVKAENDALLSHNKKLQSEILALKGRE
GVEPINLNIKETEGSSSNRSENSSEINLDISRTSATAIDSPMSAHQNNRQFFPPPMSIRS
AAAAHHHHHQQQQQQLLHGSRSDVAAAGPCMKVEQPVQDESFVNMFCGIDEHPGFWTWSE
NHSFH
>DACA015960 locus=Chr03:18533366:18534449:+ [translate_table: standard]
MRNKEEKTLFKMMNMVHHEDGLTLGLGYGGGRTTESKFSSDGHRHHQFKHYEPSLTLGRP
SEDSIHGGNDEATTTTTTTVTTMAAAAASHSSPNSAVSSFSNVNLSAVKRERDIASEDVD
LERPVSSRVSDEDEDGSTGARKKLRLTKEQSALLEDSFKEHSTLNPKQKQDLAHRLNLRP
RQVEVWFQNRRARTKLKQTEVDCEFLKRCCESLTDENRRLQKELQELKMIKYAPSMPLYM
QFPAATLSMCPSCERIASTGGGEDKAKAATFLIGAPKPTHLYGPFTNSPAAC
>DACA006789 locus=Chr06:17336365:17338974:+ [translate_table: standard]
MDSGRLIFDPSCGDGNMLILGNGGYVFRGGRSAMNIEEGSKRRPFFTSPDEFIEEEYYDE
QLPEKKRRLTPEQVHLLERSFEMENKLEPERKTQLAKKLGLQPRQVAVWFQNRRARWKTK
QLEKDFDLLKSSYDSLLSDYDTVSKENDLLRSKITMLTENLNEKEPTNVMTEEKAVPATG
DRISSGSSGGSAVMDVEEGPQLMADSDESYFPGDHELRAIGGGGGDCGAHSEEGDDGSDN
GGYLTDVLAAAERRHQEEEVQVGWWEWSEKVL
>DACA023137 locus=Chr08:784609:787172:- [translate_table: standard]
MAGRSRIYGGSKLTIVGDPPPEAIEALLVSGSSPGFHGTMVNFQEVHQQPFYQPLDPEEA
ADDDFDECAHQPGKKRRLSSEQVKLLERSFDTENKLEPERKIQLAKDLGLQPRQVAIWFQ
NRRARWKTKQLEKDYDVLKTSYDGLKGDYDCLLKEKEKLKAEVIFYTEKLRQREHDRRNT
DPTDLTLLAKPVPNLVTTTNQEAEEPQILIACKQEDLSSANGDVFDADSPLSLPLDPADS
SNAPLSDESHCEAEEEEPIFRHFPKLEEDDYTSQCNYGFPVDEQTFWLWS
>DACA013364 locus=Chr11:7402726:7404164:- [translate_table: standard]
MEMAFFPANFIFQSPHEDSSNPHQPPPPLLSSLLPSCTIHGFQGAATLIGKSSMSIEEDE
LSDDGLQIREKKRRLSVEQVRILEKNFELGNKLEPERKMQLARALGLQPRQIAIWFQNRR
ARWKIKQLERDYDVLKRRFDAVKAKNEALISKNKKIQSEILALKGREAQEPINLNINDTE
GSSSNSSEINLDISRTSATASVAAEAVTAHHHQQQHLLHWTSSRSEAPPPQCTKTKQPVQ
EESFVNMFCGIDEHPGFWTWSENHNFH
>DACA005431 locus=Chr12:6847830:6850879:- [translate_table: standard]
MKDKGRCCSIVSFQEVQGHTPDRTFYLPHDPEDVADDDFDECAHQPEKKRRLSSEQVQFL
ERSFENENKLEPERKVQLAKDLGLQPRQVAIWFQNRRARWKTKQLQKDYDALKVSYDSLK
ADYDCLLNEKEKLKAEVILYTEKLLRREQERGNMDPNDHASLAKQVSNSVSTTNQEAEPP
VLLTCKQEDLSSINSDVLDADSPCSPPLDPADSSNAPFEHDPSDDEEPIFPKLEEDYTGQ
CNYGLPIDEHNFWLWP
>DACA001730 locus=Chr03:13773813:13775310:+ [translate_table: standard]
MSMDDMDEQMLLLSELYSEYYTSQILPQGEGKVRRRRKRKGKGEGESKKRRLSDEQVKFL
EMNFGRERKLESGRKVHLATELGLDPKQVAVWFQNRRARWKTKQLEEEYSKLKAEKEAIV
LDKCHLQAQILKLEQQLSEAEKEIRRLSGQSDGDGSPSSSFSMATHHPLMEEDHHTVHQN
EALLYVHENNYIHTMEWLNSYGF
>DACA022464 locus=Chr03:28715628:28717834:+ [translate_table: standard]
MIGDANNYNKPPSNNKGASNIPNNTNKKKKNKFYRHTKEQIRILQAIFDRNSHPDEKQMK
ELSLQLNMKRSQIKFWFQNRRTHLKVQTDRHENVLLREENDRLRIENTTLVEKMANLVCS
VCGGDDNKTLLLLSLERSKHELHEKNACLREELNRLRAHYEKIINQNVNNTTTANVSSST
LAGFGGPSSTLPTPILPQTFPSQAPTNFMLCDPSTDPWLGGGRVRGKSRSAE
>DACA008364 locus=Chr09:6034729:6035961:+ [translate_table: standard]
MAWNNANFILYPARYEESLTFIYDPDRFSSVPVGVQGMDQAAIAGERLQAQPVTAPGRVG
VRGGGGSSDGGGAERKRRLSTEQMEHLERSFLEEFKLEPERKMRLARELGLHPRQVAVWF
QNRRARWKTKQLERVYSALKHDFDAVSREKQRLQEECYG
>DACA013924 locus=Chr06:12486019:12486945:- [translate_table: standard]
MEEQTCHTWLGLGFGCRSEELYVQGRKDSEQKPPVKLQLLFPLETKSDEDEVPKKKFRLT
REQTCLLEEKFREHNTLTLNQKQELAEQLNLQFRQVEVWFQNRKARTKLKQKEVHYEFLK
KCCESLNEENRQLKRKVQELHSIKPSGWPYHEHLSKMAATLRVCPSCKRNSIAGDGKTNN
SDGLESMRGR
>DACA020879 locus=Chr02:14605226:14606667:- [translate_table: standard]
MELGLCLGDTTMRFRLDGKDNGSPNMGLSIGGGGGGRDEEEDEVRVSVDRPIQLDLLPFA
PVPRSQVSSSSSSQMGLQWLNNGNSERGFDVNRPPEEAVEESSPSAGSSFPMEFSFAAAA
ADGEAAEAARASSRASDEDEMGSTRKKLRLSKEQSAFLEESFKEHNTLNPKQKLVLAKQL
SLRPRQVEVWFQNRRARTKLKQTEVDCEYLKRCCETLTEENRRLQKELQELRALKTTHPY
YMQFPATTLTMCPSCERVATSTTSSAAAAAPPAGAPPQAKPLFDAFKTRQPNKSTAS
>DACA006153 locus=Chr05:26188498:26189591:+ [translate_table: standard]
MGPDDGAIRSSSSEKRQRSVDGEERSDEDDGETAAKKKLRLSKEQSAVLEESFREHNTLN
PDQKQKLVLAKKLNLKPRQVEVWFQNRRARTKLKQTEVDCELLKKCCKNLTEENRRLQRE
LIELRSLKRSPHLFMQVPATTLTLCPTCETARRRRPQIRS
>DACA004061 locus=Chr03:20116171:20117182:+ [translate_table: standard]
MEEETCYTGLGLGLGCRDFGRERKPPVKLHLLFPHESAKEEMRSDEDEEVVMKDNNSAVG
DDHVNDDIGVGNARKKLRLTKEQTSLLEESFRQHNTLTPAQKQELAEQLNLRARQVEVWF
QNRRARTKLKQTEVDCEFLKKCCESLSDENRRLKRELQELRSIKPGAASPFYMNLSKTAA
VTTMTVCPSCERNSVGKDGRITTGATNNGGLDFKPNLYGTTVKDSPSNMAC
>DACA017576 locus=Chr06:2312013:2313801:- [translate_table: standard]
MELLQRSPSGLELTMAVPGLSPSSDHVGCCNIRDLDINQPPATDEDEYDEEGSAVRCGSD
GGARKKLRLTKEQSLLLEESFRENQTLNPKQKEALASKLQLRPRQVEVWFQNRRARTKLK
QTEMECEYLKRWYGTLTEENRRLQREVEELRSLRVAPPTVISPHTCQPLPASSLTMCPRC
ERISTSNNYSGHYNYYNNNSGGGGDDKRKGGNGGGGGGGLGFFRTPQTC
>DACA018421 locus=Chr10:7311092:7311953:+ [translate_table: standard]
MMVRNDDHLGLSLSLSPSGGGNHHHHHQHRLPLQLDLMSPSPVATAAQPFVFQQRNNRSD
VLASSADRNRFLRGIDVNRAPPPAAAAEADLEEEAGVSSPNSTVSSVSGGGGGAKRSSAE
RGPFASEKIGLAREANEAERASSSRGNSDEEEDGGEHSRKKLRLSKDQSAVLEESFKEHN
TLNPKQKMALAKQLNLRARQVEVWFQNRRAR
>DACA008908 locus=Chr10:10088591:10091076:- [translate_table: standard]
MELALPVCGGRCSFLRSTRENVERESKDHPSLQLELKLSWSNELDVNAVPPKIDRDGEAS
RSSSTNHALTDAEAEKGSCKCSEDDDEGGGGATKTRQKKLRLSKEQSCYLEDSFKEHTTL
NPLQKQKNAIAKQLNLRPRQVEVWFQNRRARTKLRQTELDYECLKQRCENLTTENQRLRQ
ELQGLRALRVPTHRANAPPTALYVCPSCEKATPTTGDDGKRLGGYLGFPMRLKRQLC
>DACA012489 locus=Chr04:27666731:27668717:+ [translate_table: standard]
MMLVGNDDHLGLSLSLVPSSGVDGHHHHRQRLPLQLNLMPPSPEATEAQPFVFHHKNHWS
DAVVSSDRETTRSRFLRGIDVNRAPAKTTAVVDLEEEEEEGVGVSSPNSTVSSVSGGAKR
SSAEREGFFGGNDKIGVAGDENETERASSSRGMSDDEDGGEHSRKKLRLSKDQSAVLEES
FKEHSTLNPDEIEADGGGLRVPKEVLRESDGGESEAAEGGARAEGAEDVPSVLHADDTPD
DAHHVPFLREGLLLRVLY
>DACA009322 locus=Chr09:14296476:14297507:- [translate_table: standard]
MKRQSSSDSLEALLPMCPSPTTEEKVIIGDQSLMDGYEEEEVQTAMMMSSSSPSEKKRRL
SVDQVKALEKNFEVENKLEPERKTRLATELGLQPRQVAVWFQNRRARWKTKHLEREFSVL
KSNYDFLKISFDSLQRDKDSLLAEIKELKAKMMEEEEKLPSMEGKESDAPDAKIDGRDYL
IDGSSDDSDSSAVLNAASVTVKMDGGGSCTSGSPGPPMDPCFTFGFGSRSDDHQYQFEHD
FFTAASDVAYDFFFDEPTNPTGDGGNRRELSGI
>DACA006215 locus=Chr06:7083522:7085003:- [translate_table: standard]
MSKDNKEEEQMQDEVEEEQMLFLRELYSEYYTTQLPPQGEGKVRRRRKRKGKGEGEAKKR
RLSDEQVKFLEMNFGRERKLESGRKVHLATELGLDPKQVSVWFQNRRARWKTKQLEEEYS
KLKTEKEAIVADKYHLETQVLKLKEKLSIAEKEIKRLSGQSEGDGLWSGGEMTSSPSSSF
SMVTHKPFMADDHQNEALLYVHESNYIHTMEWLNSYVL
>DACA016288 locus=Chr34:6391:6940:- [translate_table: standard]
MFESKTKLEARQKLQLAVELGLQPRQVAIWFQNKRARWKSKQLEREYSILRAQYDALLAN
FESVNKEKQSLMKQLSKMVDLLERQDLISKDGFEGETKCVKDEATASDQSGENSEWWEFW
P
>DACA013303 locus=Chr04:5728597:5730529:- [translate_table: standard]
MDSGRLIFDSSDDNVFFFGDGGYGFHGSKRRPFFSSPDDYVEEYYDEQLPEKKRRLTPEQ
VHLLEMSFEVENKLEPDRKAQLAEKLGLQPRQVTVCMVPESKGPLEDEATRERLSLPQVL
LRLPPL
>DACA005525 locus=Chr12:8111140:8126508:- [translate_table: standard]
MEDDEFMTKQDHGVKRKTPLQIQSLERFYSEEKYPKPKAIEDYAASLNLTYKQVSKWFSD
KRRKERKENDLCRVSNDGSGNILKERSSLLEEVQSGPDRSNCDQMWTAEANLMNESGSGT
EGSGNNSAMRSSLGQGGPETQVHVGILNLDQSNRGSSQEVPISMIEKGSLYQRRMQPKRI
HKKTQESSESMDGHRLFHSHNGFVGQGFRQGPSRIWKKKLVRLQILVSPEYILKKVFRKD
GPPLGVEFETLPDGAFGRSNDSIYLLRRDDQREPKSRKISKSPLDLRNLQSNSAPMRKYG
IGKGLMTVWRATNSENESLPPQVNFLNKRLTNISPNSVLSISKESSCQMLKRSQPRRFAQ
KKRPLVNKVQDKRKSSMKKRKVVNSKDGNEKVYRTDCKLALDGHMSLEYLNTTTELVDDE
ELELSELQAGRNPLRCSVHLATNGKHGCSLCKDLLARFPPSSVKMKLPLCTKPWDTSPDV
VKKLFKIFRFLYTHAVAIGICPFTLDEFAQAFHDKDSLLLGKIHLALLKLLLSDVEMEID
TGVLPRAMKDCRFLRFLHTVRLQVFCVKIWSKCLNPLTWIEILRQVLIAAGFGSNQDSLR
RGMLNKEGNLMAKYGLRSRTLKGELFSILSEHGSKGLQVSELAKFPQIVELDLPNTKDEL
EDLICSTLSSDITLFEKISSFAYRLRVNPLMKKGMGVSQSDTDDSGSVDDDFEGASTSSN
SSDDSDGSDLDSSMCEQAIVRYKSPHKRKRNKLVEYTEIDESYPGEAWVVGLMEGEYSNL
STEEKLSALAALVDLAGSGSSLRKEDPARSLSTNMPNIQQQRSGAKIKKASANSSTLPPS
YWGHMQSSTGTGNAERTVEMPSGVHPLQSIFLGSDRRYNSYWLFLGPCIVNEPGHRRVYF
ESSEDGHWEVIDTEEALCSLLSVLDGRGAREAQLLASLTKREALLSQVMSENRKNESETG
IRQAKSSDPSDMDVNNGNGSSPISDLDNNLNLSEGTSDGSASSGAILLELGKNYEEKKQK
WDRLQEFDTWIWNSFYNNLNAVRFSKVPYLDSLTRCRSCHDLYWRDEKHCKICHTTFELD
FDLEEKYVVHVATCREIEGTSMFPSHKVLPSQLQALKAAIHAIESVLPEEACGRTWTSSA
RKLWGKRLRRTSSVPELLQVLTDLVGAISEEWLSQCGFSLGSNTFLDEILVFFQTMPQTT
SAFALWMVKLDTVIGPYLERLQSEKSLKCKPQVKRKRVVS

## Sheet: Ac. calamus
>CP_A09g00712 locus=Chr09:8933869:8939115:+
MAKVVMDSGKYVRYTPEQVEALERVYMECPKPSSMRRQQLIMDCPILSNIEPKQIKVWFQNRRCREKQRKEASRLQTVNRKLTAMNKLLMEENDRLQKQVSHLVYENGYMKHQIRTAPVPTTDNSCESVVTGGQHQQNPTPQHPQRDANNPAGLLAIAEETLAEFLSKATGTAVDWVQMLGMKPGPDSIGIIAVSHNCSGVAARACGLVSLEPTKVAEILKDRPSWYRDCRCVDVLTAIPTGNGGTIELIYMQTYAPTTLATARDFWTLRYTTGLEDGSLVICERSLTSSTGGPTGPPAPTFVRAEMLPSGYLIRPCDGGGSIIHIVDHVDLDALSVPEVLRPLYESSKILAQKMTIAALRHIRQIAQENSGEINHGGGRQPAVLRTFSQRLSRGFNDA…
>CP_A07g00847 locus=Chr07:14812677:14820385:+
MMAVASCKEGKGGLDNGKYVRYTPEQVEALERFYHECPKPSSIRRQQLIRDCPILSNIEPKQIKVWFQNRRCREKQRKEASRLQAVNRKLTAMNKLLMEENDRLQKQVSQLVYENGCFRQQTLNTALPTTDTSCESVVTSGQHHLATQRPPRDASPAGLMSIAEETLTEFLSKATGTAVEWVQMPGMKPGPDSIGIIAISHGCPGVAARACSLVGLEPTRVAEILKDRPSWFRDCRSVDVINVLPTTNGGTIELLYMQLYAPTTLAPARDFWLLRYTSILDDGSLVVCERSLSNTQGGPSMPPVQPFSRAEMLPSGYLIRPCDGGGSIIHIVDHMDLEPWSVPEVLRPLYESSTVLAQKTTLAALRHLRQITHEVTNSNNTGWGRQPVALRALSQRLSR…
>CP_A06g00792 locus=Chr06:9760801:9778666:+
MMAVTSCKEGKGGLDNGKYVRYTPEQVEALERLYHECPKPSSIRRQQLIRDCPILSNIEPKQIKVWFQNRRCREKQRKEASRLQAVNRKLTAMNKLLMEENDRLQKQVSQLVYENGYFRQQTQNTALATTDTSCESVVTSGQHHLTPQHPPRDASPAGLMSIAEETLAEFLSKATGTAVEWVQMPGMKPGPDSIGIIAISHGCPGVAARACGLVGLEPAKVAEILKDRPSWFRDCRSVDVINVLPTANGGTIELLYMQIYAPTTLAPARDFWLLRYTSILDDGSLVVCERSLSNTQGGPSMPLVQPFARAEMLPSGYLIRPCEGGGSIIHIVDHMDLEALRHLRQISHEVTHSNNTGWGRQPVALRALSQRLSRGFNEALNGFTDEGWSLMGNDGIDDV…
>CP_A06g00796 locus=Chr06:9819103:9829000:+
MMAVTSCKEGKGGLDNGKYVRYTPEQVEALERLYHECPKPSSIRRQQLIRDCPILSNIEPKQIKVWFQNRRCREKQRKEASRLQAVNRKLTAMNKLLMEENDRLQKQVSQLVYENGYFRQQTQNTALATTDTSCESVVTSGQHHLTPQHPPRDASPAGLMSIAEETLAEFLSKATGTAVEWVQMPGMKPGPDSIGIIAISHGCPGVAARACGLVGLEPAKVAETLKDRPSWFRDCRSVDVINVLPTANGGTIELLYMQIYAPTTLAPARDFWLLRYTSILDDGSLVVCERSLSNTQGGPSMPLVQPFARAEMLPSGYLIRPCEGGGSIIHIVDHMDLEPWSVPEVLRPLYESSTVLAQKTTMAALRHLRQISHEVTHSNNTGWGRQPVALRALSQRLSR…
>CP_A01g02553 locus=Chr01:40234559:40238860:-
MSFGGFVDSGHKPIFTSPGLSLALQTSMDGVLVRRQSGDFDFGGLNREEEYESRSGSDNIEGGSGDELDPDEPPSKKKKRYHRHTPQQIQELEALFKECPHPDEKQRLELSRRLSLETRQVKFWFQNRRTQMKTQLERHENSILRHENDKLRAENMSIRDTMSNPICTNCGGPALLGEVSLEEQHLRIENARLKDELDRICALAGRFLGKPVSAHLGAHHLPMPSSSLELGVGSATNGFGVPGQVPGSFNVPVGVDRSVFLELALTAMDELVKMAQEREPLWVPGLYGGRETVNYEEYLRMFPRCIGVRPMGFATEATRDTGLVIINGIALVETLMDANRWADMFPAMISRTSTTDVISSGMGGTRNGALQLMHAELQVLSPLVPVREVNFLRFCKQHA…
>CP_A01g00952 locus=Chr01:11348966:11354808:-
MPAGIMTPAGHMPPMMGRNGKFVAGYGSSGLSLNQPNLMEGQQHQLHHQLEITQTPESEMAKIRGEDDFECKSGSENLEGASGDDQDPNQRPNKKKRYHRHTQHQIQEMEAFFKECPHPDDKQRKELSRELGLEPLQVKFWFQNKRTQMKTQHERHENTQLRSDNDKLRAENMRYKEALSNASCPNCGGPAALGEMSFDEHHLRIENARLREEIDRISGIAAKYVGKPIGSYPLLSPSISARSPLDLGVGNYGVQPGIGGEMFGAGELLRSVSGQPEIEKPMVIELAVAAMEELVRMAQIGEPLWVPGLDNPMEILSEEEYVRTFPRGIGPRPFGLKSEASRETAVVIMNRINLVEILMDVNQWSTVFSGIVSRAMTLEVLSTGVAGNYNGALQVMTAE…
>CP_A09g01241 locus=Chr09:23285681:23291163:-
MPTGIMIPAGHMPPMMGRTGKIVAGYGSSGLSLSQPNLLEGQQHQLQHHHQPEFMQTPESVDMAKIRGGEDDFESKSGSENLEGASGDDQDPNQRPKKKRYHRHTQHQIQEMEAFFKECPHPDDKQRKELGRELGLEPLQVKFWFQNKRTQMKTQHERHENSQLRADNDKLQAENMRYKEALTNASCPNCGGPAALGEMSFDEHHLRIENARLREEIDRISAIAAKYVGKPMASYPLLSPSISSRSPLDLGFGVQPGIGGEMFGAGELLRSVSGQPEFEKPMVVELAVAAMEELVRMAQIGEPLWVPSLNNPMEILSEDEYIRTFPRGIGPRQFGLKSEASRETAVVLMNHINLVEILMDVNQWSTVFSGIVSRAMTLEVLSTGVAGNYNGALQVMTAE…
>CP_A09g00253 locus=Chr09:2477232:2477946:-
MYFPFSASPVYGDQWVLNNNNGDRSSNPSGPAMDSGEDPDALEAHRNKKKRHHRHTARQIQELESMFKECPHPDEKQRMQLSRDLGLEPRQIKFWFQNRRTQMKAQHERADNYILRSENDKIRCENIAMREALKNIICPSCGGPPLGEDSYFDEQKLRMENARLKDEVNRTPVFFHFQDCFLFPVFSD*
>CP_A10g01204 locus=Chr10:13786943:13793038:+
MYGDCQVMSSLGGGNMITSSDGLFTSPSPIRNPNHLGFLSSMPFHHHFPSLIPKEEVGVGVLGLGKEEDIMESGGSGSGHVDGLSCGEEHDNDKLNHHPKPQLENPQSKKKRYHRHTARQIQEMEALFKECPHPDDKQRMRLSQDLGLKPRQVKFWFQNRRTQMKAQQDRSDNVVLRAENENLKNENFRLQAAIRNVVCPNCGGPAVLGEMTFDEQHLRLENARLKDELERLSCIASRYGHRSVQPLGSTPPWLIPSLDLDMGMYSRHFNDPMGDVISALPPPPPPMPDSPYPTFLIMDQEKHLALELAMTAMDELVRMCHMNEPLWTRSGDEEVLDLEEHTKMFPPWPMDLKPVNHDEFRTEATRDSALVIMNSITLVDAFMDANKWVELFPSIVSKA…
>CP_A10g00664 locus=Chr10:7235514:7236763:+
MNNYKEMGFPFSNQQATRIVGDGRNGGVLGNYSFNIGVTDVDYDGLSGSGSTADSITGFTAININSKNDDNNYQRYTKEQIQVLQNIFDRCPNPDEKERRELSQLLKLSKSQIKFWFQNRRSYMKIQMERQENSLLKEENERIRKENEALVERMSKHICSNCRGDNGESSSLLLFESSMQELQLREENACVGKEIQQLITQIEIKSREALPIPMGHVPPQQQSGVTSSHNINIATNDLGLINIINAPVGNANFTSGGFIGPSSSSAFRLVTPHSPTTTFEFVKDSSGSSSTEPLAGPPPNMDDHATERVSTTDGWLGGMTRSGGSCSES*
>CP_A10g00662 locus=Chr10:7196047:7200384:-
MSFGGFLDSGHSGRVVSDIPFNTTTMPAGALSQPHLMSPPHLSKPTFSSPALSLALQTNNMEGLLVHQQPTTVGVVGGGSGGGGGGVGGGGSGSGDFDSVGRNREEEYESRSGSDNVDGVSGDEQDPNQPPSKKKRYHRHTPQQIQELESLFKECPHPDEKQRLELSRRLNLESRQVKFWFQNRRTQMKTQLERHENQILRNENDKLRAENMSIRDAMRNPICTNCGGPALLGEVSLEEQHLRIENSRLKDELDRVCTLAGKFLGRPISTLAHHPPMPNSSLELGVGGANGFGGLGHITGPMPSISDFMPGSGVSVAPNSTSVVPVASERQVFLELALAAMDELLKMAHGDDPLWMRSLDGGRETLNYEEYLRVFPRCIGVKPVGFATEATRETGLVII…
>CP_A06g00690 locus=Chr06:8430282:8435865:-
MEALFKESPHPDEKQRQQLSKRLGLAPRQVKFWFQNRRTQIKAIQERHENSLLKSEIEKLREESRNLRESKKKACCPKCGFSGRGSPAMVAEEQQLKNENARLKSEVEILRGMVGRFSGRASPPNFSSSTDNEQHIMNSIQHEDRLFGLEKSKTLDIVDGATSELLKMATTGEPLWVRSIEARRDILDYNAYIKEFSQENSTIGRARKSIEASRESGVVFLDAPRLVQAFMDVNQWKDMFACMVSKAATVDVICEGEGPNRSGAVQLMSVELQMLTPMVPTRELHFVRSCKQLSLDKWVIVDVSVDNSEGANHWRRPSGCIIEDQSNGHCKVTWVEHSEFLKSTTTPMYRTIVNSGLAFGAARWLATLHLQCERLVFSVATNVPTKDSNGVATLAGRKS…
>CP_A06g02342 locus=Chr06:37751053:37754716:+
MYFPFNASPVYGDEWVLNNNNNRSTRNANNIINNSDRPSITTGAAMDSGEDPDAPDTNRNKKKRHHRHTAHQIQELESMFKECPHPDEKQRMQLSRDLGLEPRQIKFWFQNRRTQMKAQHERADNCSLRSENDKIRCENIAMREALKNVICPSCGGPPLGEDSYFDEQKLRMENARLKEELERVSSIASKYIGRPISQLPPVQPIPISSLDLSVGPFGGGGCSSSSHHSMGLSPFFDLDLLPGSSSTPPSLSIPATGLTEMEKSLMAEMAAAALDEAVRLLQADGPFWVKNSSDGREVLDLDSYVRAFPKLGPPKSPDVRIEASRDSGLVIMNTLALVDMFMDSAKWAELFPTIVSKVRTIEILATGMAGSRSGSLVLMTAELQVLSPVVSTREFHFLR…
>CP_A03g02025 locus=Chr03:32840862:32842748:+
MDNHNEMGFSFNNHQPEEVIEAGGDNEDLFDIGDLDLGFLMGDSDYNGPLKNNSYNININNNNMINNSNINSIPTSKNKKKKEKINRHSKEQIQILQSLFKQCPHPDERRMKELSQLLNLKKSQIKYWFQNQRSYEKIKTERQDNGQLKDENDRLRIDNSILQKKIANMVCSKCRGDDNQMSLLLSSLECSMRQLREQNSQMEEEIQHLQTNIDKTSTQSLLGGGGGGGGFTRLAHLQTQSSAGLFNSTTNVAAAAPIGTNFMHVGSSSSSVPQHAFPRQTMMDNARAHGGMRFVGSTYASRNTDQVPSMQDIVSGRISVADPWLGGRITHGGHRLKKKSVRDDNENDNDDDDNDDE*
>CP_A09g00610 locus=Chr09:7409835:7411232:-
MEMAFFPANFIFQSPHEDSSNPHQPPPPPLLSSLLPSCTIHGLQGAATLIGKRSMSIEEDELSDDGLQIGEKKRRLSVEQVRILEKNFELGSKLEPERKMQLARALGLRPRQIAIWFQNRRARWKIKQLERDYDVLKRRFDAVQAENEALISKNKKIQSEILVLKGREAQEPINLNIKETEGSSSSSSEINLDISRTSETASVAAEAATAHHHQQQHLFHWTSSRSEAPPPQCTKAEQPAQDESFVNMFCGIDEHPGFWTWSENHNFH*
>CP_A10g00948 locus=Chr10:10541757:10543004:+
MMVGNDDHLGLSLSLSPSGGGNHHHHHHRLPLQLDLMSPSPVETAAQPFVFPQRNNRSDLLASSADRNRFLRGIDVNRAPPPPQDLEEEAGVSSPNSTVSSVSGGGGGAKRSSAERGPFASEKIGLAGEANEAERASSSRGNSDEEEDGGEHSRKKLRLSKDQSAVLEESFKEHNTLNPKQKMALAKQLNLRPRQVEVWFQNRRARTKLKQTEVDCEFLKRCCENLTDENRRLQKEVQELRALKMSPQFYMQMTPPTTLTMCPSCEKVAVSASSTDNNNNNHHQIHHHRPIPWTPTPVRARFDATMARS*
>CP_A06g00542 locus=Chr06:6675492:6676840:+
MTPTMEMPFFPSNFIFQDPHEDSPNPHHHHQPPPPLLSSLLPSCTSQDFQGVATLMGKQRSMSYEDGVGNGEDELSDEGSQMGEKKRRLNVEQVRTLEKNFELGNKLEPERKMQLARALGLQPRQIAIWFQNRRARWKTKQLEKDYDLLKRQFDAVKAENDALLSHNKKLQSEILALKGREGVEPINLNIKETEGSSSNRSENSSEINLDISRTAATAIDSPMSTHQNNRQFFPPPMSIRSAAAAAAHHHHHHQQQQLLHGSRSDAAAVAPCMKVEQPVQDESFVNMFCGIDEHPGFWTWSENHSFH*
>CP_A08g00491 locus=Chr08:6401384:6402427:-
MAWNNANFILYPARYEESLTFIYDPDRFSSVPVGVQGMDQAAIAGERLQAQPVSAPGRVGVRGVGGSSDGGGAERKRRLSTEQMEHLERSFLEEFKLEPERKMRLARELGLHPRQVAVWFQNRRARWKTKQLERVYSALKHDFDAVSREKQRLQEEVVRLKAVLEERVDKQDSTCCPTEEEEVSAEDETVESASATATAVALHRSNNFTQGSSSSYQPHPHVPAGGSDYVFDMQDYSDTWSVLPGYALS*
>CP_A02g00035 locus=Chr02:403131:404212:-
MRNKEEKTLFKMMNMVHHEDGLTLGLGYGGGRTTESKLSSDGHRHHQFKLYEPSLTLGWPSEDSIHGGYDEATTTTTTTVTTMAAAAASHSSPNSTVSSFSNVNLSAVKRERDIVSEEVDLERPVSSRISDEDEDGSTGARKKLRLTKEQSALLEDSFKEHSTLNPKQKQDLAHRLNLRPRQVEVWFQNRRARTKLKQTEVDCEFLKRCCESLTDENRRLQKELQELKMIKYASSMPLYMQFPAATLSMCPSCERIASAGGGEDKAKAATFLIGAPKPTHLYGPFTNSPAAC*
>CP_A03g01905 locus=Chr03:30507469:30508182:-
MVEINEYYSSLGDEAAESGDSVDTTTAKKKSNNKGRRKNKRRFSEEQIQSLETLFESQTKLEPRQKLQLAVELGLQPRQVAIWFQNKRARWKSKQLEREYSALRAQYDTLLANFESVNKEKQSLMKQLSKMVDLLERQDLVSKDGFEGEIKCVKDEAKSSQSMIEGSDFMLNWGDNMERTLTLPGQFCFNADASDQSGENSEWWEFWP*
>CP_A02g00417 locus=Chr02:4409238:4410765:-
MLRLSHYIKRHRTQDQKKETTTTYNMSMDDMEEQMLLLSELYSEYYTSQVPPQGEGKVRRRRKRKGKGEGESKKRRLSDEQVKFLEMSFGRERKLESGRKVNLASELGLDPKQVAVWFQNRRARWKTRQLEEEYSKLKAEKEAIVLDKCHLQAQILKLEQQLSEAEKEIRRLSGQSDGDGSPSSSFSMATNHPLMGDDLHTVQQNEALLYVHENNYIHTMEWLNSYGF*
>CP_A09g00312 locus=Chr09:3291097:3292484:+
MRFRLDSKDNGSPNMGLSIGGGGRDEEEDEVRVSVDRPIQLDLLPFAPVPRSQVSSSSSSQMGLPWLNNGNSERGFDVNRPPEEAVEESSPSAGSSFPMEFAFAAAAADGEAAEAARASSRASDEDEMGSTRKKLRLSKEQSAFLEESFKEHNTLNPKQKLVLAKQLNLRPRQVEVWFQNRRARTKLKQTEVDCEYLKRCCETLTEENRRLQKELQELRALKTTHPYYMQFPATTLTMCPSCERVATSTTSSAAAAAPPAGAPPQAKPLFDAFKTRPPNKPTAS*
>CP_A05g01945 locus=Chr05:22921910:22924553:-
MDSGRLIFDPSCGDGNMLIIGNGGYVFRGGRSAMNMEEGSKRRPFFTSPDEFIEEEYYDEQLPEKKRRLTAEQVHLLERSFETENKLEPERKTQLAKKLGLQPRQVAVWFQNRRARWKTKQLEKDFDLLKSSYDSLLSDYDTVSKENDLLRSKIAMITENLNGKEPTNVMTEEKAVPTTGDRISTGSSGGSAVMDVEEGPQLMADSDESYFPRDHELGPIGGVGGDCGAHSEEGDDGSDNGGYLTDVLAAAERRHQEEEVQVGWWEWSEKVL*
>CP_A07g00385 locus=Chr07:4633694:4636421:-
MAGRSRIYGGSKLTTVGDPPPEAIEALLVSGSSPGFHGTMVNFQEVHQQPFYQSLDPEEVADDDFDEFAHQPGKKRRLSSEQVKFLERSFDTENKLEPERKIQLAKDLGLQPRQVAIWFQNRRARWKTKQLEKDYDVLKTSYDGLKGDYDCLLKEKEKLKAELIFYTEKLLQREQDRNTDPIDLTLLAKPVPNPVPTTNQEAEEPQILIACKQEDLSSANGDVFDADSPLSLQLDPADSSNAPLSDESHCEAEEEEPIFRHFPKLEEDDYTSQCNYGFPVDEQTFWLWS*
>CP_A07g00374 locus=Chr07:4474693:4477423:+
MAGRSRIYGGSKLTTVGDPPPEAIEALLVSGSSPGFHGTMVNFQEVHQQPFYQSLDPEEVADDDFDEFAHQPGKKRRLSSEQVKFLERSFDTENKLEPERKIQLAKDLGLQPRQVAIWFQNRRARWKTKQLEKDYDVLKTSYDGLKGDYDCLLKEKEKLKAELIFYTEKLLQREQDRRNTDPIDLTLLAKPVPNPVPTTNQEAEEPQILIACKQEDLSSANGDVFDADSPLSLQLDPADSSNAPLSDESHCEAEEEEPIFRHFPKLEEDDYTSQCNYGFPVDEQTFWLWS*
>CP_A10g00582 locus=Chr10:6014882:6017168:+
MAGRSSSRYGGSNKSTVVEGFTSETIEALLVSGSSSGFHGSMVNFQEVQGHTPDRTFYLPHDPEDVADDDFDECAHQPEKKRRLSSEQVQFLERSFENENKLEPERKVQLAKDLGLQPRQVAIWFQNRRARWKTKQLQKDYDALKASYDGLKADYDCLLNEKEKLKTEVILYTEKLLRREQERGNTDPNDHASLAKQVPNSVSTTNQEAEPPVLLTCKQEDLSSINSDVLDADSPCSPPFDPVDSSMHPSSTTHRMMKSPSSQSLKKTTQASAIMDYPLMSITSGYGLDCVIFM*
>CP_A05g01179 locus=Chr05:12417851:12419342:-
MSKDNKEEEQMQDEAEEEQMLFLRELYSEYYTTQLPPQGEGKVRRRRKRKGKGEGEAKKRRLSDEQVKFLEMNFGRERKLESGRKVHLATELGLDPKQVSVWFQNRRARWKTKQLEEEYSKLKAEKEAIVADKYHLETQVLKLKEKLSIAEKEIKRLSGQSEGDGLWSGGEMTSSPSSSFSMVTHKPFMADDHQNEALLYVHESNYIHTMEWLNSYVL*
>CP_B04g01969 locus=Chr04:28588615:28589731:+
MMTGQDDGAIGSSSSEKRQRSAEGEERSDEDDGETAAKKKLRLSKEQSAVLEESFREHNTLNPKQKLVLAKKLNLKPRQVEVWFQNRRARTKLKQTEVDCELLKKCCKNLTEENRRLQRELIELRSLKRSPHLFMQVPATTLTLCPTCETARRRRPQIRS*
>CP_A10g01363 locus=Chr10:15828644:15831044:+
MELTLPVGGGRCSFLRCTGENVGRESEDHPSLQLELKLSWSNELDVNSVPSKSDRNGEAGRSSSTNHALTDAEAEKGSSKCSEDDKEGGGGVTKTRQKKLRLSKEQSCYLEDSFEEHTTLSPKQKNAIAKQLNLRPRQVEVWFQNRRARTKLKQTEVDYERLKQRCENLTTENQRLRRELQELRALRAPTHRANASPTALCVCPSCEKATPTTSDDGKRFGGYLGFPMRLKRQFC*
>CP_A05g01681 locus=Chr05:18910603:18911596:+
MVHEDGLSLGLGYGGGGGGGATTTESKLSSDGHHQKQQDLQFKHYYEPSLTLGRPSDDSNSVVSSFSNVVNTSAPPAVKRERDDVASEERPAVSSRVSDEDEDVGTGKRKQALAKQLNLRPRQVEVWFQNRRARTKLKQTEMDCEILKRCCENLTDENRRLQKELQELKKIKYAPSSTPPIYMQFPAAATLSVCPSCERMISSAGGSGDNTKAAAPFLIAPKPTHLYGSFTNSPAAC*
>CP_A01g01358 locus=Chr01:15624660:15632204:+
MKQKEALASKLQLRPRQVEVWFQNRRARTKLKQTEMECEYLKRWYGTLTEENRRLQREVEELRLLRVAPPTVISPHTCQPLPASSLTMCPRCERISTSNNNNGHYNYYNNNSGGGGDDKRKGGNGGGGGVGFLSYPTDLLRVISE*
>CP_A02g01535 locus=Chr02:22797826:22798701:-
MKMKRTKLKQTEVDCEFLKKCCESLSDENRRLKRELQELRSMKPGAASPFYMNLSKTASVTTMTVCPSCERNSVGKDGRITTGGTNNGGLDFKPKLYGTTVKDSPSNMAC*
>CP_A06g02002 locus=Chr06:33635780:33636778:+
MKRQSSSDSLEALLPVCPSPTTEKVMIGDQSLMDGYDEEEVQTAMMMSSSPSEKKRRLSVDQVKALEKNFEVENKLEPERKARLATELGLQPRQVAVWFQNRRARWKTKQLEREFSVLKSNYDFLKISFESLQRDKDSLLAEIKELKAKMMEEEKVPSMKGKESDAPDAKIDGRDYLIDGSSDDSDSSAVLNAASVTVKMDGGGSCTSGSPGPPMDPPFAFGFGSRSDDHQYQFEHDFFTAASDVAYDFFFDEPTSPTGDGGNRRELSGF*
>CP_A08g01693 locus=Chr08:26544725:26545030:-
MSFEVENKLEPDRKTQLAKNLGLQPRQVTVWFQNRRARWKMKQLERDFHCLKSSYDSLLSDYNTVSKENDALRSEVYTIFNTPIPSIQYNVNFLVNIITIT*
>CP_A05g01722 locus=Chr05:19454371:19456353:+
MGDFNILDNKNKRKKSRHTKEQIQALNSVFEQSNRPNENKIKELCEKINMKISQIKTWFQNRRSHLKRAGYHRILQQSPTSPKEIHNRRISYLSLHLWLFIKDFDDVWAVRKGMQEGGNWWSK*
>CP_A03g02030 locus=Chr03:32883483:32884142:-
MTELAQRISIDDAQVRYWFQNRHTRTKLRMEEYENKMLREENDMIMQENMANLDFLRRHMYCSRCLNGGMTVEELRMENIWLRKELARVIAHVEDVSGQPILALLSVVPNETSSPPPASSATTDDFLSLGPPNHV*
>CP_A03g02029 locus=Chr03:32874798:32875577:-
MKKSQIKYWFQNQRSYKKIKMERHDNEQLKEENDRLRIDNAIIQKKITNMVCSKCRGDDSQMSLLLSSLECSMRDLREEKSHMEQEIQHLQMHIDKSGGGFAGLACLQTQSSSGSSLSTNVGAAAAPIGTSFMTAGSSSASSVVSHENALAHALRSMGQLPSMEDIVSGRISAADPWLGGRITRGGYRPKKRSVRDVDVDGGDDE*
>CP_A01g02162 locus=Chr01:34651796:34652553:-
MDDMNMDIGNMEEQTLLFKELYSTFCTLRGRKNLNSGKAVHLATELGLKPKQVTVWFHNRRVSWRKKKLEEKHSKLKAGRSSIKADMEGLGSKQGSFTSKAAYIWEAKISLKAVLHVRRGS*
>CP_A08g01689 locus=Chr08:26498083:26501348:-
MDSGRLIFDPSRDGNVIFFGDGGCGFNGSKRRPFFSSPDDYFEEYYDEQLPEKKRRLTPEQNRRARWKMKQLERDFHCLKSSYDSLLSDYNTVSKENDALRSEAPINLIE*
>CP_B22g00189 locus=Chr22:2826280:2831512:+
MAKVVMDSGKYVRYTPEQVEALERVYMECPKPSSMRRQQLIMDCPILSNIEPKQIKVWFQNRRCREKQRKEASRLQTVNRKLTAMNKLLMEENDRLQKQVSHLVYENGYMKHQIRTAPVPTTDNSCESVVTGGQHQQNPTPQHPQRDANNPAGLLAIAEETLAEFLSKATGTAVDWVQMLGMKPGPDSIGIIAVSHNCSGVAARACGLVSLEPTKVAEILKDRPSWYRDCRCVDVLTAIPTGNGGTIELIYMQTYAPTTLATARDFWTLRYTTGLEDGSLVICERSLTSSTGGPTGPPAPTFVRAEMLPSGYLIRPCDGGGSIIHIVDHVDLDALSVPEVLRPLYESSKILAQKMTIAALRHIRQIAQENSGEINHGGGRQPAVLRTFSQRLSRGFNDA…
>CP_B18g01039 locus=Chr18:19637893:19644842:-
MMAVTSCKEGKGGLDNGKYVRYTPEQVEALERLYHECPKPSSIRRQQLIRDCPILSNIEPKQIKVWFQNRRCREKQRKEASRLQAVNRKLTAMNKLLMEENDRLQKQVSQLVYENGYFRQQTQNTALATTDTSCESVVTSGQHHLTPQHPPRDASPAGLMSIAEETLAEFLSKATGTAVEWVQMPGMKPGPDSIGIIAISHGCPGVAARACGLVGLEPTKVAEILKDRPSWFRDCRSVDVINALPTANGGTIELLYMQIYAPTTLAPARDFWLLRYTSILDDGSLVVCERSLSNTQGGPSMPLVQPFARAEMLPSGYLIRPCEGGGSIIHIVDHMDLEPWSVPEVLRPLYESSIVLAQKTTMAALRHLRQISHEVTHSNNTGWGRQPVALRALSQRLSR…
>CP_B18g02110 locus=Chr18:32796467:32804508:-
MRRQQLIRECPILSNIEPKQIKVWFQNRRCREKQRKEACRLQTVNRKLNAMNKLLMEENERLQKQVSQLVYENGYMRQQLQSASLATDTTCESVVTTPHHSLRDANNPTGLLSIAEETLAEFLSKATGTAVDWVQMPGMKPGPDSTGIVAISHSCSGVAARACGLVSLEPTKIAEILKDRPSWFRDCRSLEVFTMFPAGNGGTVELVYMQMYAPTTLAPARDFWTLRYTTGLEDGSLVVCERSLSGSGGGPSASTAHQFVRAEMLPSGYLIRPCEGGGSIVHIVDHVDLEAWRVPEVLRPLYESSKVVAQKLTIAALHHIKQIAQEISGEVVYNLGRQPAVLRTFSQRLSRGFNDAINGFIDDGWSLLDCDGVEDVIISTNSSKCMGTNVNPGNPLAMS…
>CP_B20g00613 locus=Chr20:8204475:8211842:-
MMVVASCKEGKGVLDNGKYVRYTPEQVEALERFYDECPKPSSIRRQQLIRDCPILSNIEPKQIKVWFQNRRCREKQRKEASRLQAVNRKLTAMNKLLMEENDRLQKQVSQLVYENGCFRQQTLNTALPTTDTSCESVVTSGQHHLATQRPPRDASPAGLMSIAEETLAEFLSKATGTAVEWVQMPGMKPGPDSIGIIAISHGCPGVAARACSLVGLEPTRVAEILKDRPSWFRDCRSVDVINVLPTTNGGTIELLYMQLYAPTTLAPARDFWLLRYTSILDDGSLVVCERSLSNTQGGPSMPLVQPFSRAEMLPSGYLIRPCDGGGSIIHIVDHMDLEPLSVPEVLRPLYESSTVLAQKTTLAALRHLRQITHEVTNSNNTGWGRQPVALRALSQRLSR…
>CP_B20g01643 locus=Chr20:24184376:24185618:-
MNNYKEMGFPFSNHQATRIVGEGRNGGVLGNYSFNIGVTDVDYDGLSGSGSTGDSITGVAAININSKNDDNNYQRYTKEQIEVLQNIFDRCPNPDEKERRELSQLLKLSKSQIKFWFQNRRSYMKIQMERQENSLLKEENERIRKENEALMERMSKHICSNCRGDNGESSSLLLFESSMQELQLREENACIGKEIQQLITQIETKSRETLPIPMGHVPPQQQSGVTSSHNLNIATNDLGLINIINAPVGNANFTSGGFIGPSSSSAFRLVTPHSPTTTFEFVKDSSGSSSTEPLAGPPPNMDDLATERVSTTDGWLGGMTRSGGSCSES*
>CP_B18g02109 locus=Chr18:32779465:32784420:-
MGLSNSPLSLGLLVALFVGFAVYFRLQEIDSAFAFEEDLLSIDCLRSGEDTMLKNLWDSRDAILCCSLKAGFDMVERLEELQDMVLDETLDPKMLCSEFSDIIEQVQFLSRGLSDYRRQFDRASIEAMDESAEWRMKYDREVERVSQFSEDLSQARAALDYKNREAEDLNKRVDVLNKENSNLLEQVDSLKRDLETMKQKCHL*
>CP_B20g01209 locus=Chr20:19201411:19207266:-
MYGDCQVMSSLGGGNMITSSDGLFTSPSPIRNPNHLGFLSSMPFHHHFPSLIPKEEVGVGVLGLGKEEDIMESGGSGSGHVDGLSCGEEHDNDKLNHHPKPQLENPQSKKKRYHRHTARQIQEMEALFKECPHPDDKQRMRLSQDLGLKPRQVKFWFQNRRTQMKAQQDRSDNVVLRAENENLKNENFRLQAAIRNVVCPNCGGPALLGEMSFDEQHLRLENARLKDELERLSCIASRYGHRSVQPLGSTPPWLIPSLDLDMGMYSRHFNDPMGDVISALPPPPPPMPDSSYPTFLIMDQEKHLALELAMTAMDELVRMCHMNEPLWTRSGDEEVLDLEEHAKMFPPWPMDLKPVNHDEFRTEATRDSALVIMNSITLVDAFMDANKWVELFPSIVSKA…
>CP_B21g00885 locus=Chr21:10024865:10026748:+
MQTPESVDMAKMRGGEDDFESKSGSDNLEGASGDDQDPNQRPKKKRYHRHTQHQIQEMEAFFKECPHPDDKQRKELGRELGLEPLQVKFWFQNKRTQMKTQHERHENSQLRADNDKLRAENMRYKEALTNASCPNCGGPAALGEMSFDEHHLRIENARLREEIDRISAIAAKYVGKPMASYPLLSPSISRSPLDLGFGVQPGIGGEMFGAGEPLRSVSGQPEFEKPMVVELAVAAMEELVRMAQLGEPLWVPSLDNPMEILSEDEYIRTFPRGIGPRQFGLKSEASRETAVVLMSHINLVEILMDVNQWSSVFSGIVSRAMTLEVLSTGVAGNYNGALQVMTAEFQVPSPLVPTRESYFVRYCKQQQTTRGRWLMFR*
>CP_B11g00570 locus=Chr11:6561442:6584018:+
MRYKGHLLYNIDQNIHLLENEKYAPTPSLVVNNKYTLSLRVFTFHQKVEIKQTNMDGVLVHRQSGDFDFGGPNREEEYESRSGSDNIEGGSDDELDPDEPPSKKKKRYHRHTPQQIQELEALFKECPHPDEKQRLELSRRLSLETRQVKFWFQNRRTQMKVKSEEHHSSNKKNVV*
>CP_B19g01720 locus=Chr19:23807303:23810999:+
MYFPFNASPVYGDEWVLNNNNNTSTRNANNIINNNSDRPSIPTGAAMDSGEDPDAPDTNRNKKKRHHRHTAHQIQELESMFKECPHPDEKQRMQLSRDLGLEPRQIKFWFQNRRTQMKAQHERADNCSLRSENDKIRCENIAMREALKNVICPSCGGPPLGEDSYFDEQKLRMENARLKEELERVSSIASKYVGRPISQLPPVQPIPISSLDLSVGPFGGGGGCSSSSHHSMGLSPLFDLDLLPGSSSTAPSLSLPATVLTEMEKSLMAEMAAAALDEAVRLLQADEPFWVKNSSDGREVLDLDSYVRAFPKLGPQKNPDVRVEASRDSGLVIMNTLALVDMFMDSAKWVELFPTIVSKAKTIEILATGMAGSRSGSLVFMSAELQVLSPVVSTREFHF…
>CP_B12g01611 locus=Chr12:29851042:29853999:+
MYFPFSASPVYGDQWILNNNNGDRSSNPSGPAMDSGEDPDALEAHRNKKKRHHRHTARQIQELESMFKECPHPDEKQRMQLSRDLGLEPRQIKFWFQNRRTQMKAQHERADNCILRSENDKIRCENIAMREALKNIICPSCGGPPLGEDSYFDEQKLRMENVRLKDERLKFFLCSAKLERVSTMASKYVGRPISHFPPVQPIPISSLDLSVGSHHSICCGGGGGGHAMMGLSPPSLDLDLLHGSSSSAPALHVPPSMGMTEMEKSLMAELASAALDEAVRLLRADEPFWVRSGGDGGEVLDLDSYSRSFAKLGPAKSPDVRVEASRDSGLVFMRAHALIDMLMDSMNEELQVLSPLVATREFNFLRYCQQIEPGLWAIADVSVDLSSRETMRSAYRKLP…
>CP_B15g00698 locus=Chr15:7593143:7594392:+
MDNHSEMGLSFENHQPKGVVEAGGDNEELYGIGDLDLGILMEDNDRNGPLNNNNNNNRNDCRVHNSKNKNRKEKVHRHSKEQIQILKSLYKQCPHPDEKQRKELSQLLNMKKSQIKYWFQNQRSYKKIKTERHDNEQLKEENDRLRIDNAIIQKKITNMVCSKCRGDDNQMSLLLSSLECSMRDLREEKSHMEQEIQHLQTHIDKSGGGFAGLARLQTQSPSGSSLSTNVAAAAAAPIGTSFTTGGSSSASSVVTHENARAHALRSAGQVPSMEDIVSGRISAADPWLGGRITRGGYRPKKKSVRDVDFDGGDDE*
>CP_B18g01158 locus=Chr18:21242511:21246029:+
MEALFKESPHPDEKQRQQLSKRLGLAPRQVKFWFQNRRTQIKAIQERHENSLLKSEIEKLREENRNLRESKKKACCLSCGFSGRGGPAMVAEEQQLKNENARLKIEVEKLRGMVGRFSGRASPPNFSSSTDNEQHIMNLIQHEDRFFGLEKSKISDIVDGATSELLKMATTGEPLWVRSIEARRDILDYNAYIKEFSQEDSTIGRARKSIEASRESGVVFLDAPRLVQVFMDVNQWKDMFACMVYKAATVDVICEGEGPNRSGAVQLMSVELQMLTPMVPTRELHFVRSCKQLSLDKWVIVDVSVDDSEGANHRRRPSGCVIEDQSNGHCKVTWVEHSEYLKALPPPCTGRS*
>CP_B12g01171 locus=Chr12:24004639:24006060:+
MDMAFFPANFIFQSPREDSSNPHQPPPPPLLSSLLPSCTIHGFQGAATLIGKRSMSIEVDELSDDGLQIGEKKRRLSVEQVRILEKNFELGNKLEPERKMQLARALGLQPRQIAIWFQNRRARWKIKQLERDYDVLKRRLDAVKAENEALISKNKKIQSEILALKGREAQEPINLNIKDTEGSSSNSSEINLDISRTSATASVAAEVATAHHHQQQNLLHWTSSRSEALPPECTKAEQPVQDESFVNMFCGIDEHPGFWTWSENHNFH*
>CP_B22g00566 locus=Chr22:11562845:11565674:-
MRGNHQFDGGVGVGGHGAGLLSDDDFDAWITTLLEENVDMTPIDHDMGDSNILDNKNKRKKSRHTKEQIQALNSVFEQCNRPNENKIKELCEKLNMKRSQIKIWFQNRRSHLKDELRKENATLREKIHVIHEALNRGFLTSQHVQRYTGIGTSDPSLLSAVNGPSSSFNVLESGLLSYSTTIPIIPQGNAPQSDIIFESSPLAFYQGYLSNSHPTPYSSKDTPTIRARPSHGPHGSSTGDPPAGSIDVFLVGPA*
>CP_B20g01408 locus=Chr20:21354157:21355420:-
MMVGNDDHLGLSLSLSPSGGGNHLHHHHHHRLPLQLDLMSPSPVATAVQPFVFQQRNNRSDVLASSADRSRFLRGIDVNRAPPHAAAGAVDLEEEAGVSSPNSTVSSISGGGGGGAKRSSAERGPFANEKIGLAGEANEAERASSSRGNSDEEDDGGEHSRKKLRLSKDQSAVLEESFKEHNTLNPKQKMALAKQLNLRPRQVEVWFQNRRARTKLKQTEVDCEFLKRCCENLTEENRRLQKEVQELRALKMSPQFYMQMTPPTTLTMCPSCEKVGVSAPSNDNNNNHHHQIHHHRPIPWTPTPVRARFDATMARS*
>CP_B22g00551 locus=Chr22:11369940:11370735:-
MRGNHQFDGGVGVGGHGDGLLSDDDFDAWITTLLAENVDMTPIDLDMGDSNILDNKNKRKKSRHTKEQIQALNSVFEQCNRPNENKIKELCEKLNMKRSQIKIWFQNRRSHLKVKMDGHQNLILKGENHMLQIERKTLRAKLDSQMCSKCCCHYKDELRKENATLREKIHVIHQALNRGFLTSQHVHRYTGIGTSDPQAC*
>CP_B22g00547 locus=Chr22:11288455:11289399:-
MRGNHQFDGGVGVGGHGAGLLSDDDFDAWITTLLEEDVDMTPIDHDMGDSNILDNKNKRKKSRHTKEQIQALNSVFEQCNRPNENKIKELCEKLNMKRSQIKIWFQNRRSHLKVEMDGHQNLILKGENQMLQIERKTLQAKLDSQMCSKCCCNYKDELRKENATLREKIHVIHQALNRGFLTSQHVQRYTGIGTSDPSLLSAVNGPSSSFNVLESGLLSYSTTIPIIPQGNAPQSDIIFESSPLAFYQGF*
>CP_B22g00548 locus=Chr22:11308792:11310218:-
MRGNHQFDGGVGVGGHGAGLLSDDDFDAWITTLLEENIDMTPIDLDMGDSNILDNKNKRKKSRHTKEQIQALNSVFEQCKRPNENKIKELCEKLNMKRSQIKIWFQNRRSHLKDELRKQNATLREKFHVIHQALNRGFLTSQHVQRYTGIGTSDPSLLSAVNGPSSSFNVLERKQEPPKTTKSPKETESNQEMKRE*
>CP_B15g00703 locus=Chr15:7639859:7640888:-
MKWGMEDMNINLEEDVEKGVNLELKITCEVINTHSDSVETDSHTPSSCNKQKKLLHHSKAQIEALETFFKECPHPNEKQRIELGQRIGLDTTKVKYWFQNRRTSRIARKEWHENKKLREENEKMKMENMVTLDVLGNPMCPRCLSEDMKMEQLKMENIRLKEELARVQAHLVEVSGQPGPNLAKGPGTGPSQGPC*
>CP_B22g00550 locus=Chr22:11347968:11355818:-
MVGEKMRGNHQFDGGVGVGGHGAGLLSDDDFDAWITTFLEENVDMTPIDHDMGDSNIIDNKNKRKKSRHTKEQIQALNSVFEQCNRPNQNKIKELCEKLNMKRSQIKIWFQNRRSHLKDELRKENVTLREKIHVIHQALNRGFLTSQHVQRYTGIGKSDTSLLSAVNGPSSSVNVLESGLLSYSTTIPIIPQGNAPQSDIIFESSPLAFYQGYLSNCHPTPYSSKDTPTIRARPSHGPHGSSTGDPPAGLIDVFLVGPA*
>CP_B17g00759 locus=Chr17:10761607:10763848:-
MRQICARAAAGVREGWRTVECQRSHKRSVTQTKNQRKKDSSSDTMLLSEIEENEPKILLGEMRGNHQFDGGVGVGGHDAGLLSDDDFDAWITTLLEEDFDMTPIDFDMGNSNIIDNKNKRKKSRHTKEQIQALNFVFEQCNCPNENKIKELCDKLNMKRSQIKTWFQNRRSHLKRRILQAKLDSQMCSKCCCNYKDELHKENDTLREKIHVIHQTLNKGFLASQHVQRYTGIGTSDQSLLSVVNGPSLFNVMESGLLSYSTMIPIIPQGNALQSDIIFESSPLAFYQGF*
>CP_B22g00567 locus=Chr22:11585506:11586449:-
MRGNHQFDGGVGVGGHGAGLLSDDDFDAWITTLLEENVDMTPIDHDMGDSNILDNKNKRKKSRHTKEQIQALNSVFEQCNRPNENKIKELCEKLNMKRSQIKIWFQNRRSHLKLKCLKQVEMDGHHNLILKGENHMLQIERKTLQAKLDSQMCSKCCSNYEDELRKENATLREKIHVIHQALNRGFLTSQHVQRYTGIGTSDPSLLSAVNGPSSSVNVLESGLLSYSTTIPIIPQGNAPQSDIIFESSPLAFYQGF*
>CP_B19g01626 locus=Chr19:22920303:22922148:+
MELALSLGDMSVPINLGTLQNERKDENRASIEVRGFDMNELPPEEIVEAAAAEEEGTSPNSLSAAAAASSKLIGFKEVEVEVVEMAEGLTRKKLRLSREQSSFLEESFKENQTLNPQQKLNLAKKLNLRPRQVEVWFQNRRARTKLKQTELKREEYKREFETLRELYERLQKEVQDLRTLKTTSPSLCMLPPTTLIICHECHEKAKAAAVAPRSIQGPATTELSPVSCELSFEKVK*
>CP_B13g01720 locus=Chr13:29083588:29084664:+
MAWNNANFILYPARYEESLTFIYDPDRFSSVPVGMQGMDQAAIAGGERLQAQPVSAPGRVGVRGGGGSSDGVGAERKRRLSTEQMEHLERSFLEEFKLEPERKMRLARELGLHPRQVAVWFQNRRARWKTKQLERVYSALKHDFDAVSREKQRLQEEVVQLKAVLEERVDKQDSTCCPTEEEEVSAEDETVESASATATAVALHRSNNFTQGSSSSYQPHPHVPAGGSDYVFDMQDYSDTWSVLPGYSLS*
>CP_B20g01068 locus=Chr20:17630260:17633789:-
MKTKNRKTVKTRNRFDLATGESERAGHMPDYGSTRRNAGHHQFDGSVGVGGHGAGLLSDDDFDAWITTLLEKNFDMTPIDFDMSGSNILDNKNKRKKSRHTKEHIQALNFVFEQCNRPNKNKIKELCEKLNMERSQIKIWFQNRRSHLKVEMDSHQNLILKGENHMLQVERRTLQAKLDSQVCSKCCCNYKDELRKENATLREKIHDIHQALNRTFLTSQHIQRYTGVRTSDPSLLSAINDPSSLFNVLESGLSSYFTTIPIIPQGNAPQSDIIFESSSLAFHQGF*
>CP_B17g02638 locus=Chr17:32989842:32990859:-
MCEKQRHRASKTINMVHEDGLSLGLGYGGGGGATTTESKLSSDGHQKQQDLQFKHYYEPSLTLGRPPDDSNSVVSSFSNVVNTSAPQAVKRERDDVASEERPAVSSRVSDEDEDVGTGVRKKLRLTKEQSALLEDSFKEHSTLNPKQKQALAKQLNLRPRQVEVWFQNRRARTKLKQTEMDCEILKRCCENLTDENRRLQKELQELKKIKYGPSSTPPIYMQFPAAATLSVCPSCERMISSTGGGSGDNTKAAAPFLIAPKPTHLYGSFTNSPAAC*
>CP_B22g00546 locus=Chr22:11271596:11281350:-
MRGNHQFDGGVGVGGHGAGLLSDDDFDAWITTLLEEDVDMTPIDHDMGDSNILDNKNKRKKSRHTKEQIQALNSVFEQCNRPNENKIKELCEKLNMKRSQIKIWFQNRRSHLKVEMDGHQNLILKGENHMLQIERKTLQAKLDSQMCSKCCCNYKDELRKENATLREKIHVIHQALNRGFLTSQHVQRYTGIGTSDPSLLSVVNGPSSSFNVLESGLLSYSTTIPIIPQGNAPQSDIIFESSPLAFYQGNKSLERIMVEPFRAGMHRIVKVRRTMWGTLGLLVH*
>CP_B13g00039 locus=Chr13:424254:425332:-
MRNKEEKALFKMMNMVHHEDGLTLGLGYGGGRTSESKLSSDGHRHHLFKHYEPSLTLGRPSEDSIHGGYDEATTTTTTVTNMAAAAASHSSPNSAVSSFSNVNRSAVKRERDIASEEVDLERPVSSRVSDEDEDGSTGARKKLRLTKEQSALLEDSFKEHSTLNPKQKQDLAHRLNLRPRQVEVWFQNRRARTKLKQTEVDCEFLKRCCESLTDENRRLQKELQELKMIKYTSSMPLYMQFPAATLSMCPSCERIASAGGGEDKAKAATFLIGAPKPTHLYGPFTNSPAAC*
>CP_B18g01335 locus=Chr18:23444665:23446002:-
MTPTMEMPFFPSNFIFQDPHEDSPNPHHHHHHHQPPPPPPLLSSLLPSCTSQDFQGVATLMGKQRSMSYEDGAGNGEDELSDEGSQMGEKKRRLNVEQVRTLEKNFELGNKLEPERKMQLARALGLQPRQIAIWFQNRRARWKTKQLEKDYDLLKRQFDTVKAENDALLSHNKKLQSEILALKGREGVEPINLNIKETEGSSSNRSENSSEINLDISRTAATAIDSPMSAHQNNRQFFPPPISIRSAAAAHHHHHQQQQLLHGSRSDAAAAPCMKVEQPVQDESFVNMFCGIDEHPGFWTWSENHSFH*
>CP_B12g01534 locus=Chr12:28925881:28927254:-
MRIRLDSKDSGSPNMGLSIGGGGRDEEKDEVRVSVDRPIQLDLLPFAPVPRSQVSSSSSSQMGLQWLNNGNSERGFDVNRPPEEAVEESSPSAGSSFPMEFSFTAAAAAADGEAAEAARASSRASDEDEMGSTRKKLRLSKEQSAFLEESFKEHNTLNPKQKLVLAKQLNLRPRQVEVWFQNRRARTKLKQTEVDCEYLKRCCETLTEENRRLQKELQELRALKTTHPYYMQFPATTLTMCPSCERVATSTTSSAAAAAPPAGAPPQAKPLFDAFKTRQPNNKSTAS*
>CP_B12g00461 locus=Chr12:6180334:6189917:-
MRDNHQFDGGVGVGEHGAGLLSDDDFDAWITTLLEEDFDMTPIDFDTGGSNILDNKNKRKKSRHTKEQIQALNSVFEQCDRPNENKIKGFCEKLNVKRSQIKTWFQNRRSHLKV*
>CP_B14g01310 locus=Chr14:21715401:21717962:+
MAGRSRIYGGSKLTTVGDPPPEAIEALLVSGSSPGFHGTMVNFQEVHQQPFYQPLDPEEVADDDFDECAYQPGKKRRLSSEQVKFLERSFDTENKLEPERKIQLAKDLGLQPRQVAIWFQNRRARWKTKQLEKDYDVLKTSYDGLKGDYDCLLKEKEKLKAEVIFYTEKLLQREQDRRNTDPIDLTLLAKPVPTPVPTTNQEAEEPQILIACKQEDLSSANGDVFDADSPLSLPLDPADSSNAPLSDESHCEAEEEEPIFRHFPKLEEDDYTSQCNYGFPVDEQTFWLWP*
>CP_B15g00859 locus=Chr15:12392256:12392963:+
MVEINEYYSSLGDEADESGDSVDTTTATKMSNNKGRRKNKRRFSEEQIQSLETMFESQTKLEPRQKLQLAVELGLQPRQVAIWFQNKRARWKSKMLEREYSALRAQYDVLLANFESVNKEKQSLMKQLSKMVDLLERQDLVSKDGFEGETKCVKDKAKSSQSMIEGSDFMLNWGDNMERTLTLPGQFCFNADVSDQSGENSEWWEFWP*
>CP_B17g02220 locus=Chr17:28715735:28717178:-
MQDEVEEEQMLFLRELYSEYYTTQLPPQGEGKVRRRRKRKGKGEGEAKKRRLSDEQVKFLEMNFGRERKLESGRKVHLATELGLDPKQVSVWFQNRRARWKTKQLEEEYSKLKAEKEAIVADKYHLETQVLKLKEKLSIAEKEIKRLSGQSEGDGLWSGGEMTSSPSSSFSMVTHKPFIADDHQNEALLYVHESNYIHTMEWLNSYVL*
>CP_B22g00881 locus=Chr22:16564580:16566848:-
MAGRSSSRYGGSNKSTVVEGFTSEAIEALLVSGSSSGLHGSMVNFQEVQGHTPDRTFYLPHDPEDVADDDFDECAHQPEKKRRLSSEQVQFLERSFENENKLEPERKVQLAKDLGLQPRQVAIWFQNRRARWKTKQLQKDYDALKASYDGLKADYDCLLNEKEKLKAEVILYTEKLLQREQERGNMDPNDHASLAKQVPNSVSTTNQEAEPPVLLTCKQEDLSSINSDVLDADSPCSPPFDPVDSSNAPFEHDPSDDEEPIFPKLEEDYTGQCNYGLPIDEHNFWLWP*
>CP_A16g00063 locus=Chr16:771533:772630:-
MDTYDDGTEDGAIGSSSSEKRQRSADGEERSDEDDGETAAKKKLRLSKEQSAVLEESFREHNTLNPKQKLVLAKKLNLKPRQVEVWFQNRRARTKLKQTEVDCELLKKCCKNLTEENRRLQRELVELRSLKRSPHLFMQVPATTLTLCPTCETARQRRPQIRS*
>CP_B18g00143 locus=Chr18:1641535:1642552:+
MEEETCYTDLGLGLGCRDLDRERKPPVKLHLLFPHESAKEEMRSDEDEEVVMKENNSTVGDDHVNDDIGVGNARKKLRLTKEQTSLLEESFRQHNTLTPAQKQELAEQLNLRARQVEVWFQNRRARTKLKQTEVDCEFLKKCCESLSDENRRLKRELQELRSINPGAASPFYMNLSKTAAVTTMTVCPSCERNSVGKGGRITTGATNNGGLDFKPKLYGTTVKDSPSNMAC*
>CP_B12g00251 locus=Chr12:3102933:3110227:+
MELLQRSPSGLELTMAVAGLSPSSDHVGCCNIRDLDINQPPATDEDEYDEEGSAVRCGSDGGARKKLRLTKEQSLLLEESFRENQTLNPKQKEALASKLQLRPRQVEVWFQNRRARTKLKQTEMECEYLKRWYGTLTEENRKLQREVEELRSLRVAPPTVISPHTCQPLPASSLTMCPRCERISTSNNNNNGHYNYYNNNSGGGGGGAVVRTLSLTRGLNERPRGPKLSIYA*
>CP_B20g01155 locus=Chr20:18571502:18573779:+
MELTLPVGGGQCSFYRSTGENVGRESEDHLSLQLELKLSWSNELDVNAVPQKSDHDGEASRSSSTNHALTDAEAEKGSSKCSEDDKEGGGGATKTRQKKLRLSKEQSCYLEDSFEEHTTLSPKQKNAIAKQLNLRPRQVEVWFQNRRARTKLKQTELDYERLKQRCENLTTENQRLRRELQELRALRAPTHRANGPPTALCVCPSCEKATPTTGDDGKRLGGYLGFPIKLKRQLC*
>CP_B20g01161 locus=Chr20:18637927:18640202:+
MELTLPVGGGQCSFYRSTGENVGRESEDHLSLQLELKLSWSNELDVNAVPQKSDHDGEASRSSSTNHALTDAEAEKGSSKCSEDDKEGGGGATKTRQKKLRLSKEQSCYLEDSFEEHTTLSPKQKNAIAKQLNLRPRQVEVWFQNRRARTKLKQTELDYERLKQRCENLTTENQRLRRELQELRALRAPTHRANGPPTALCVCPSCEKATPTTGDDGKRLGGYLGFPIKLKRQLC*
>CP_B11g00306 locus=Chr11:3263532:3265558:-
MMLVGNDDHLGLSLSLVPSSGTGGHHHHQRLPLQLNLMPPSPEATATATAGQPFVFHHKNHWSDVLVSSDRETTRSRFLRGFDVNRAPAPAKTTAVVDLGEEEEEEVGVSSPNSTVSSVSGGAKRSSAEREGFFGGNDKIGVAGDENETERASSSRGMSDDEDGGEQSRKKLRLSKDQSAVLEESFKEHSTLNPDEIEADGGGLRVPKEVLRESDGGESEAAEGGARAEGAEDVPSVLHADDTSDDAHHVPFLREGLLLCFLY*
>CP_B17g00516 locus=Chr17:6453198:6455887:+
MDSGRLIFDPSCGDGNMLILGNGGYIFRGGRTAMNMEEGSKRRLFFTSPDDFIEEEYYDEQLPEKKRRLTPSRSFETENKLEPERKTQLAKKLGLQPRQVAVWFQNRRARWKTKQLEKDFDLLKSSYDSLLSDYDNVSKENDLLRSKITILTENLNGKEPTNVIMKEKTVPVTGDRISSGSSGGSAVMDVEEGPQLMADSDESYFPGDHELGPIGGGGRDCGAHSEEGDDGSDNGGYLTDVLAAAERQHQEEEVQVGWWDWSEKVL*
>CP_B19g01374 locus=Chr19:19549927:19550948:+
MKRQSSSDSLEALLPMCPSPTTEEKVMIGDQSLMDGYDEEEVQTAMMISSSPSEKKRRLSVDQVKALEKNFEVENKLEPERKARLATELGLQPRQVAVWFQNRRARWKTKQLEREFSVLKSNYDFLKISFESLQRDKDSLLAEIKELKAKEEEKVPSMEGKESDAPDAKIDGRDYLIDGSSDDSDSSAVLNAASVTVKMDGGGSCTSGSPGPPMDPCFPFGFGSRSDDHQYQFEHDFFTAASDVAYDFFFDEPTSPTGDGGNRRELSGI*
>CP_B19g01375 locus=Chr19:19594701:19595720:+
MKRQSSSDSLEALLPMCPSPTTEEKVMIGDQSLMDGYDEEEVQTAMMISSSPSEKKRRLSVDQVKALEKNFEVENKLEPERKARLATELGLQPRQVAVWFQNRRARWKTKQLEREFSVLKSNYDFLKISFESLQRDKDSLLAEIKELKAKEEEKVPSMEGKESDAPDAKIDGRDYLIDGSSDDSDSSAVLNAASVTVKMDGGGSCTSGSPGPPMDPCFPFGFGSRSDDHQYQFEHDFFTAASDVAYDFFFDEPTSPTGDGGNRRELSGI*
>CP_B13g00551 locus=Chr13:5816032:5817447:-
MDEQMLLLREGKVRRRRKRKGKGEGESKKRRLSDEQVKFLEMNFGRERKLESERKVHLASELGLDPKQVAVWFQNRRARWKTKQLEEEYSKLKAEKEAVVLDKCHLQAQILKLEQQLSEAEKEIRRLSRQSDGDGSPSSSFSMTTHHPLMGDDLHTVEQNEALLYVHENNYIHTMEWLNSYGF*
>CP_B20g01873 locus=Chr20:26876854:26879054:-
MGDANYNKPPSNNKKGDSNIPNNTNKKKKNKFYRHTKEQIRILQAIFDRNSHPDEKQMKELSLQLNMKRSQIKFWFQNRRTHLKILQLIHGLVVEEFEVNPVLQSDCGQEMLFIF*
>CP_B15g00702 locus=Chr15:7628146:7630017:-
MVNHNEMGFSFNNHQPEEVIEAGGDNEELFDIGDLDLGQMKELSQLLNLKKSQIKYWFQNQRSYEKIKTERHDNEQLKGENDRLRIDNSILQKKIANTVCSKCRGDDNQMSLLLSSLECSMRELRLQNSHMEEEIQHLQTNIDKTLTQSLSGSGGSGFARLAHLQNQSSAGLFNTTNVAAPPPTGTNFMNVGSSSSSVPQHAFPRQTMMDNSRAHGGMRFVGSTYASRSTGQVPSMQDIVSGRISVADPWLGGRITHGGHRPKKKSVRDDNENGNDDDGNDDE*
>CP_B15g00697 locus=Chr15:7589388:7590013:+
MTELAQRIGIDDAQVRYWFQNRHTRTKLRMEEYENKLLREENDMIMQENMANLDFLRRHMYCSRCLNGGMTVEELRMENIWLRKELARVIAHVEDVSGQPIVALLSVVPDETSSPPPASSATTDDFLSLGPPNHV*
>CP_B21g01266 locus=Chr21:20210222:20211087:-
MEVLEWENMIMTLSEEDFDMTPIDFDMGDSNILDNKNKRKKSITQNIFEQCNRPNENKIKEFCEKLNMKRSQIKTWFQNRRSHLKDELRKENATLREKIHVIHQALNRAFLTSQHVQIYTGIGTSDPSLLNAVNGPSSLFNVLESGISSYSTTIPIIPQENAP*
