# Supplementary material for: Genome-wide characterization and expression profiling of the HD-ZIP gene family in Acoraceae under salinity and cold stress
Source: Front Plant Sci. 2024 Apr 26;15:1372580. doi: 10.3389/fpls.2024.1372580 (PMC11082295; doi:10.3389/fpls.2024.1372580)
Supplement: Supplementary file 3 [file Table_2.xlsx]

## Sheet: Ac. gramineus
miRNA_Acc.	Target_Acc.	Expectation	UPE$	miRNA_start	miRNA_end	Target_start	Target_end	miRNA_aligned_fragment	alignment	Target_aligned_fragment	Inhibition	Target_Desc.	Multiplicity
far-miR166	DACA002672	0	-1	1	21	554	574	CCGGACCAGGCUUCAUCCCAG	:::::::::::::::::::::	CUGGGAUGAAGCCUGGUCCGG	Cleavage	locus=Chr07:12662273:12669644:-	1
far-miR166	DACA015668	0	-1	1	21	554	574	CCGGACCAGGCUUCAUCCCAG	:::::::::::::::::::::	CUGGGAUGAAGCCUGGUCCGG	Cleavage	locus=Chr08:11066706:11074546:-	1
far-miR166	DACA022171	0	-1	1	21	539	559	CCGGACCAGGCUUCAUCCCAG	.::::::::::::::::::::	UUGGGAUGAAGCCUGGUCCGG	Cleavage	locus=Chr02:2486221:2491454:+	1
far-miR166	DACA002429	0	-1	1	21	569	589	CCGGACCAGGCUUCAUCCCAG	: :::::::::::::::::::	CCGGGAUGAAGCCUGGUCCGG	Cleavage	locus=Chr11:16707398:16716252:-	1
far-miR166	DACA015342	0	-1	1	21	569	589	CCGGACCAGGCUUCAUCCCAG	: :::::::::::::::::::	CCGGGAUGAAGCCUGGUCCGG	Cleavage	locus=Chr07:24317952:24325668:-	1
pta-miR166c	DACA015668	0	-1	1	21	554	574	CCGGACCAGGCUUCAUCCCAG	:::::::::::::::::::::	CUGGGAUGAAGCCUGGUCCGG	Cleavage	locus=Chr08:11066706:11074546:-	1
pta-miR166c	DACA002672	0	-1	1	21	554	574	CCGGACCAGGCUUCAUCCCAG	:::::::::::::::::::::	CUGGGAUGAAGCCUGGUCCGG	Cleavage	locus=Chr07:12662273:12669644:-	1
pta-miR166c	DACA022171	0	-1	1	21	539	559	CCGGACCAGGCUUCAUCCCAG	.::::::::::::::::::::	UUGGGAUGAAGCCUGGUCCGG	Cleavage	locus=Chr02:2486221:2491454:+	1
pta-miR166c	DACA015342	0	-1	1	21	569	589	CCGGACCAGGCUUCAUCCCAG	: :::::::::::::::::::	CCGGGAUGAAGCCUGGUCCGG	Cleavage	locus=Chr07:24317952:24325668:-	1
pta-miR166c	DACA002429	0	-1	1	21	569	589	CCGGACCAGGCUUCAUCCCAG	: :::::::::::::::::::	CCGGGAUGAAGCCUGGUCCGG	Cleavage	locus=Chr11:16707398:16716252:-	1
aly-miR165a-3p	DACA022171	0.5	-1	1	20	540	559	UCGGACCAGGCUUCAUCCCC	::::::::::::::::::.	UGGGAUGAAGCCUGGUCCGG	Cleavage	locus=Chr02:2486221:2491454:+	1
aly-miR165a-3p	DACA002672	0.5	-1	1	20	555	574	UCGGACCAGGCUUCAUCCCC	::::::::::::::::::.	UGGGAUGAAGCCUGGUCCGG	Cleavage	locus=Chr07:12662273:12669644:-	1
aly-miR165a-3p	DACA015668	0.5	-1	1	20	555	574	UCGGACCAGGCUUCAUCCCC	::::::::::::::::::.	UGGGAUGAAGCCUGGUCCGG	Cleavage	locus=Chr08:11066706:11074546:-	1
aly-miR165a-3p	DACA015342	0.5	-1	1	20	570	589	UCGGACCAGGCUUCAUCCCC	::::::::::::::::::.	CGGGAUGAAGCCUGGUCCGG	Cleavage	locus=Chr07:24317952:24325668:-	1
aly-miR165a-3p	DACA002429	0.5	-1	1	20	570	589	UCGGACCAGGCUUCAUCCCC	::::::::::::::::::.	CGGGAUGAAGCCUGGUCCGG	Cleavage	locus=Chr11:16707398:16716252:-	1
aly-miR165b-3p	DACA002429	0.5	-1	1	20	570	589	UCGGACCAGGCUUCAUCCCC	::::::::::::::::::.	CGGGAUGAAGCCUGGUCCGG	Cleavage	locus=Chr11:16707398:16716252:-	1
aly-miR165b-3p	DACA015342	0.5	-1	1	20	570	589	UCGGACCAGGCUUCAUCCCC	::::::::::::::::::.	CGGGAUGAAGCCUGGUCCGG	Cleavage	locus=Chr07:24317952:24325668:-	1
aly-miR165b-3p	DACA002672	0.5	-1	1	20	555	574	UCGGACCAGGCUUCAUCCCC	::::::::::::::::::.	UGGGAUGAAGCCUGGUCCGG	Cleavage	locus=Chr07:12662273:12669644:-	1
aly-miR165b-3p	DACA022171	0.5	-1	1	20	540	559	UCGGACCAGGCUUCAUCCCC	::::::::::::::::::.	UGGGAUGAAGCCUGGUCCGG	Cleavage	locus=Chr02:2486221:2491454:+	1
aly-miR165b-3p	DACA015668	0.5	-1	1	20	555	574	UCGGACCAGGCUUCAUCCCC	::::::::::::::::::.	UGGGAUGAAGCCUGGUCCGG	Cleavage	locus=Chr08:11066706:11074546:-	1
ath-miR165a-3p	DACA015668	0.5	-1	1	21	554	574	UCGGACCAGGCUUCAUCCCCC	::::::::::::::::::.	CUGGGAUGAAGCCUGGUCCGG	Cleavage	locus=Chr08:11066706:11074546:-	1
ath-miR165a-3p	DACA002672	0.5	-1	1	21	554	574	UCGGACCAGGCUUCAUCCCCC	::::::::::::::::::.	CUGGGAUGAAGCCUGGUCCGG	Cleavage	locus=Chr07:12662273:12669644:-	1
ath-miR165a-3p	DACA022171	0.5	-1	1	21	539	559	UCGGACCAGGCUUCAUCCCCC	::::::::::::::::::.	UUGGGAUGAAGCCUGGUCCGG	Cleavage	locus=Chr02:2486221:2491454:+	1
ath-miR165a-3p	DACA015342	0.5	-1	1	21	569	589	UCGGACCAGGCUUCAUCCCCC	::::::::::::::::::.	CCGGGAUGAAGCCUGGUCCGG	Cleavage	locus=Chr07:24317952:24325668:-	1
ath-miR165a-3p	DACA002429	0.5	-1	1	21	569	589	UCGGACCAGGCUUCAUCCCCC	::::::::::::::::::.	CCGGGAUGAAGCCUGGUCCGG	Cleavage	locus=Chr11:16707398:16716252:-	1
ath-miR165b	DACA015342	0.5	-1	1	21	569	589	UCGGACCAGGCUUCAUCCCCC	::::::::::::::::::.	CCGGGAUGAAGCCUGGUCCGG	Cleavage	locus=Chr07:24317952:24325668:-	1
ath-miR165b	DACA002429	0.5	-1	1	21	569	589	UCGGACCAGGCUUCAUCCCCC	::::::::::::::::::.	CCGGGAUGAAGCCUGGUCCGG	Cleavage	locus=Chr11:16707398:16716252:-	1
ath-miR165b	DACA022171	0.5	-1	1	21	539	559	UCGGACCAGGCUUCAUCCCCC	::::::::::::::::::.	UUGGGAUGAAGCCUGGUCCGG	Cleavage	locus=Chr02:2486221:2491454:+	1
ath-miR165b	DACA002672	0.5	-1	1	21	554	574	UCGGACCAGGCUUCAUCCCCC	::::::::::::::::::.	CUGGGAUGAAGCCUGGUCCGG	Cleavage	locus=Chr07:12662273:12669644:-	1
ath-miR165b	DACA015668	0.5	-1	1	21	554	574	UCGGACCAGGCUUCAUCCCCC	::::::::::::::::::.	CUGGGAUGAAGCCUGGUCCGG	Cleavage	locus=Chr08:11066706:11074546:-	1
bna-miR166f	DACA002672	0.5	-1	1	21	554	574	UCGGACCAGGCUUCAUCCCCC	::::::::::::::::::.	CUGGGAUGAAGCCUGGUCCGG	Cleavage	locus=Chr07:12662273:12669644:-	1
bna-miR166f	DACA015668	0.5	-1	1	21	554	574	UCGGACCAGGCUUCAUCCCCC	::::::::::::::::::.	CUGGGAUGAAGCCUGGUCCGG	Cleavage	locus=Chr08:11066706:11074546:-	1
bna-miR166f	DACA022171	0.5	-1	1	21	539	559	UCGGACCAGGCUUCAUCCCCC	::::::::::::::::::.	UUGGGAUGAAGCCUGGUCCGG	Cleavage	locus=Chr02:2486221:2491454:+	1
bna-miR166f	DACA002429	0.5	-1	1	21	569	589	UCGGACCAGGCUUCAUCCCCC	::::::::::::::::::.	CCGGGAUGAAGCCUGGUCCGG	Cleavage	locus=Chr11:16707398:16716252:-	1
bna-miR166f	DACA015342	0.5	-1	1	21	569	589	UCGGACCAGGCUUCAUCCCCC	::::::::::::::::::.	CCGGGAUGAAGCCUGGUCCGG	Cleavage	locus=Chr07:24317952:24325668:-	1
ppt-miR166j	DACA022171	0.5	-1	1	21	540	560	UCCGGACCAGGCUUCAUUCCC	::.:::::::::::::::::	UGGGAUGAAGCCUGGUCCGGA	Cleavage	locus=Chr02:2486221:2491454:+	1
ppt-miR166j	DACA002672	0.5	-1	1	21	555	575	UCCGGACCAGGCUUCAUUCCC	::.:::::::::::::::::	UGGGAUGAAGCCUGGUCCGGA	Cleavage	locus=Chr07:12662273:12669644:-	1
ppt-miR166j	DACA015668	0.5	-1	1	21	555	575	UCCGGACCAGGCUUCAUUCCC	::.:::::::::::::::::	UGGGAUGAAGCCUGGUCCGGA	Cleavage	locus=Chr08:11066706:11074546:-	1
ppt-miR166j	DACA002429	0.5	-1	1	21	570	590	UCCGGACCAGGCUUCAUUCCC	::.:::::::::::::::::	CGGGAUGAAGCCUGGUCCGGA	Cleavage	locus=Chr11:16707398:16716252:-	1
ppt-miR166j	DACA015342	0.5	-1	1	21	570	590	UCCGGACCAGGCUUCAUUCCC	::.:::::::::::::::::	CGGGAUGAAGCCUGGUCCGGA	Cleavage	locus=Chr07:24317952:24325668:-	1
ppt-miR166k	DACA022171	0.5	-1	1	21	540	560	UCCGGACCAGGCUUCAUUCCC	::.:::::::::::::::::	UGGGAUGAAGCCUGGUCCGGA	Cleavage	locus=Chr02:2486221:2491454:+	1
ppt-miR166k	DACA015342	0.5	-1	1	21	570	590	UCCGGACCAGGCUUCAUUCCC	::.:::::::::::::::::	CGGGAUGAAGCCUGGUCCGGA	Cleavage	locus=Chr07:24317952:24325668:-	1
ppt-miR166k	DACA002429	0.5	-1	1	21	570	590	UCCGGACCAGGCUUCAUUCCC	::.:::::::::::::::::	CGGGAUGAAGCCUGGUCCGGA	Cleavage	locus=Chr11:16707398:16716252:-	1
ppt-miR166k	DACA002672	0.5	-1	1	21	555	575	UCCGGACCAGGCUUCAUUCCC	::.:::::::::::::::::	UGGGAUGAAGCCUGGUCCGGA	Cleavage	locus=Chr07:12662273:12669644:-	1
ppt-miR166k	DACA015668	0.5	-1	1	21	555	575	UCCGGACCAGGCUUCAUUCCC	::.:::::::::::::::::	UGGGAUGAAGCCUGGUCCGGA	Cleavage	locus=Chr08:11066706:11074546:-	1
ppt-miR166l	DACA002429	0.5	-1	1	21	570	590	UCCGGACCAGGCUUCAUUCCC	::.:::::::::::::::::	CGGGAUGAAGCCUGGUCCGGA	Cleavage	locus=Chr11:16707398:16716252:-	1
ppt-miR166l	DACA015668	0.5	-1	1	21	555	575	UCCGGACCAGGCUUCAUUCCC	::.:::::::::::::::::	UGGGAUGAAGCCUGGUCCGGA	Cleavage	locus=Chr08:11066706:11074546:-	1
ppt-miR166l	DACA015342	0.5	-1	1	21	570	590	UCCGGACCAGGCUUCAUUCCC	::.:::::::::::::::::	CGGGAUGAAGCCUGGUCCGGA	Cleavage	locus=Chr07:24317952:24325668:-	1
ppt-miR166l	DACA002672	0.5	-1	1	21	555	575	UCCGGACCAGGCUUCAUUCCC	::.:::::::::::::::::	UGGGAUGAAGCCUGGUCCGGA	Cleavage	locus=Chr07:12662273:12669644:-	1
ppt-miR166l	DACA022171	0.5	-1	1	21	540	560	UCCGGACCAGGCUUCAUUCCC	::.:::::::::::::::::	UGGGAUGAAGCCUGGUCCGGA	Cleavage	locus=Chr02:2486221:2491454:+	1
aly-miR166a-3p	DACA002429	1	-1	1	21	569	589	UCGGACCAGGCUUCAUUCCCC	::.:::::::::::::::.	CCGGGAUGAAGCCUGGUCCGG	Cleavage	locus=Chr11:16707398:16716252:-	1
aly-miR166a-3p	DACA022171	1	-1	1	21	539	559	UCGGACCAGGCUUCAUUCCCC	::.:::::::::::::::.	UUGGGAUGAAGCCUGGUCCGG	Cleavage	locus=Chr02:2486221:2491454:+	1
aly-miR166a-3p	DACA002672	1	-1	1	21	554	574	UCGGACCAGGCUUCAUUCCCC	::.:::::::::::::::.	CUGGGAUGAAGCCUGGUCCGG	Cleavage	locus=Chr07:12662273:12669644:-	1
aly-miR166a-3p	DACA015668	1	-1	1	21	554	574	UCGGACCAGGCUUCAUUCCCC	::.:::::::::::::::.	CUGGGAUGAAGCCUGGUCCGG	Cleavage	locus=Chr08:11066706:11074546:-	1
aly-miR166a-3p	DACA015342	1	-1	1	21	569	589	UCGGACCAGGCUUCAUUCCCC	::.:::::::::::::::.	CCGGGAUGAAGCCUGGUCCGG	Cleavage	locus=Chr07:24317952:24325668:-	1
aly-miR166b-3p	DACA002672	1	-1	1	21	554	574	UCGGACCAGGCUUCAUUCCCC	::.:::::::::::::::.	CUGGGAUGAAGCCUGGUCCGG	Cleavage	locus=Chr07:12662273:12669644:-	1
aly-miR166b-3p	DACA022171	1	-1	1	21	539	559	UCGGACCAGGCUUCAUUCCCC	::.:::::::::::::::.	UUGGGAUGAAGCCUGGUCCGG	Cleavage	locus=Chr02:2486221:2491454:+	1
aly-miR166b-3p	DACA015668	1	-1	1	21	554	574	UCGGACCAGGCUUCAUUCCCC	::.:::::::::::::::.	CUGGGAUGAAGCCUGGUCCGG	Cleavage	locus=Chr08:11066706:11074546:-	1
aly-miR166b-3p	DACA015342	1	-1	1	21	569	589	UCGGACCAGGCUUCAUUCCCC	::.:::::::::::::::.	CCGGGAUGAAGCCUGGUCCGG	Cleavage	locus=Chr07:24317952:24325668:-	1
aly-miR166b-3p	DACA002429	1	-1	1	21	569	589	UCGGACCAGGCUUCAUUCCCC	::.:::::::::::::::.	CCGGGAUGAAGCCUGGUCCGG	Cleavage	locus=Chr11:16707398:16716252:-	1
aly-miR166c-3p	DACA015668	1	-1	1	21	554	574	UCGGACCAGGCUUCAUUCCCC	::.:::::::::::::::.	CUGGGAUGAAGCCUGGUCCGG	Cleavage	locus=Chr08:11066706:11074546:-	1
aly-miR166c-3p	DACA002672	1	-1	1	21	554	574	UCGGACCAGGCUUCAUUCCCC	::.:::::::::::::::.	CUGGGAUGAAGCCUGGUCCGG	Cleavage	locus=Chr07:12662273:12669644:-	1
aly-miR166c-3p	DACA022171	1	-1	1	21	539	559	UCGGACCAGGCUUCAUUCCCC	::.:::::::::::::::.	UUGGGAUGAAGCCUGGUCCGG	Cleavage	locus=Chr02:2486221:2491454:+	1
aly-miR166c-3p	DACA015342	1	-1	1	21	569	589	UCGGACCAGGCUUCAUUCCCC	::.:::::::::::::::.	CCGGGAUGAAGCCUGGUCCGG	Cleavage	locus=Chr07:24317952:24325668:-	1
aly-miR166c-3p	DACA002429	1	-1	1	21	569	589	UCGGACCAGGCUUCAUUCCCC	::.:::::::::::::::.	CCGGGAUGAAGCCUGGUCCGG	Cleavage	locus=Chr11:16707398:16716252:-	1
aly-miR166d-3p	DACA002429	1	-1	1	21	569	589	UCGGACCAGGCUUCAUUCCCC	::.:::::::::::::::.	CCGGGAUGAAGCCUGGUCCGG	Cleavage	locus=Chr11:16707398:16716252:-	1
aly-miR166d-3p	DACA002672	1	-1	1	21	554	574	UCGGACCAGGCUUCAUUCCCC	::.:::::::::::::::.	CUGGGAUGAAGCCUGGUCCGG	Cleavage	locus=Chr07:12662273:12669644:-	1
aly-miR166d-3p	DACA015668	1	-1	1	21	554	574	UCGGACCAGGCUUCAUUCCCC	::.:::::::::::::::.	CUGGGAUGAAGCCUGGUCCGG	Cleavage	locus=Chr08:11066706:11074546:-	1
aly-miR166d-3p	DACA015342	1	-1	1	21	569	589	UCGGACCAGGCUUCAUUCCCC	::.:::::::::::::::.	CCGGGAUGAAGCCUGGUCCGG	Cleavage	locus=Chr07:24317952:24325668:-	1
aly-miR166d-3p	DACA022171	1	-1	1	21	539	559	UCGGACCAGGCUUCAUUCCCC	::.:::::::::::::::.	UUGGGAUGAAGCCUGGUCCGG	Cleavage	locus=Chr02:2486221:2491454:+	1
aly-miR166e-3p	DACA015668	1	-1	1	21	554	574	UCGGACCAGGCUUCAUUCCCC	::.:::::::::::::::.	CUGGGAUGAAGCCUGGUCCGG	Cleavage	locus=Chr08:11066706:11074546:-	1
aly-miR166e-3p	DACA015342	1	-1	1	21	569	589	UCGGACCAGGCUUCAUUCCCC	::.:::::::::::::::.	CCGGGAUGAAGCCUGGUCCGG	Cleavage	locus=Chr07:24317952:24325668:-	1
aly-miR166e-3p	DACA002429	1	-1	1	21	569	589	UCGGACCAGGCUUCAUUCCCC	::.:::::::::::::::.	CCGGGAUGAAGCCUGGUCCGG	Cleavage	locus=Chr11:16707398:16716252:-	1
aly-miR166e-3p	DACA022171	1	-1	1	21	539	559	UCGGACCAGGCUUCAUUCCCC	::.:::::::::::::::.	UUGGGAUGAAGCCUGGUCCGG	Cleavage	locus=Chr02:2486221:2491454:+	1
aly-miR166e-3p	DACA002672	1	-1	1	21	554	574	UCGGACCAGGCUUCAUUCCCC	::.:::::::::::::::.	CUGGGAUGAAGCCUGGUCCGG	Cleavage	locus=Chr07:12662273:12669644:-	1
aly-miR166f-3p	DACA015668	1	-1	1	21	554	574	UCGGACCAGGCUUCAUUCCCC	::.:::::::::::::::.	CUGGGAUGAAGCCUGGUCCGG	Cleavage	locus=Chr08:11066706:11074546:-	1
aly-miR166f-3p	DACA015342	1	-1	1	21	569	589	UCGGACCAGGCUUCAUUCCCC	::.:::::::::::::::.	CCGGGAUGAAGCCUGGUCCGG	Cleavage	locus=Chr07:24317952:24325668:-	1
aly-miR166f-3p	DACA002429	1	-1	1	21	569	589	UCGGACCAGGCUUCAUUCCCC	::.:::::::::::::::.	CCGGGAUGAAGCCUGGUCCGG	Cleavage	locus=Chr11:16707398:16716252:-	1
aly-miR166f-3p	DACA022171	1	-1	1	21	539	559	UCGGACCAGGCUUCAUUCCCC	::.:::::::::::::::.	UUGGGAUGAAGCCUGGUCCGG	Cleavage	locus=Chr02:2486221:2491454:+	1
aly-miR166f-3p	DACA002672	1	-1	1	21	554	574	UCGGACCAGGCUUCAUUCCCC	::.:::::::::::::::.	CUGGGAUGAAGCCUGGUCCGG	Cleavage	locus=Chr07:12662273:12669644:-	1
aly-miR166g-3p	DACA015668	1	-1	1	21	554	574	UCGGACCAGGCUUCAUUCCCC	::.:::::::::::::::.	CUGGGAUGAAGCCUGGUCCGG	Cleavage	locus=Chr08:11066706:11074546:-	1
aly-miR166g-3p	DACA002429	1	-1	1	21	569	589	UCGGACCAGGCUUCAUUCCCC	::.:::::::::::::::.	CCGGGAUGAAGCCUGGUCCGG	Cleavage	locus=Chr11:16707398:16716252:-	1
aly-miR166g-3p	DACA002672	1	-1	1	21	554	574	UCGGACCAGGCUUCAUUCCCC	::.:::::::::::::::.	CUGGGAUGAAGCCUGGUCCGG	Cleavage	locus=Chr07:12662273:12669644:-	1
aly-miR166g-3p	DACA015342	1	-1	1	21	569	589	UCGGACCAGGCUUCAUUCCCC	::.:::::::::::::::.	CCGGGAUGAAGCCUGGUCCGG	Cleavage	locus=Chr07:24317952:24325668:-	1
aly-miR166g-3p	DACA022171	1	-1	1	21	539	559	UCGGACCAGGCUUCAUUCCCC	::.:::::::::::::::.	UUGGGAUGAAGCCUGGUCCGG	Cleavage	locus=Chr02:2486221:2491454:+	1
aly-miR166h-3p	DACA015342	1	-1	1	21	569	589	UCGGACCAGGCUUCAUUCCCC	::.:::::::::::::::.	CCGGGAUGAAGCCUGGUCCGG	Cleavage	locus=Chr07:24317952:24325668:-	1
aly-miR166h-3p	DACA002429	1	-1	1	21	569	589	UCGGACCAGGCUUCAUUCCCC	::.:::::::::::::::.	CCGGGAUGAAGCCUGGUCCGG	Cleavage	locus=Chr11:16707398:16716252:-	1
aly-miR166h-3p	DACA022171	1	-1	1	21	539	559	UCGGACCAGGCUUCAUUCCCC	::.:::::::::::::::.	UUGGGAUGAAGCCUGGUCCGG	Cleavage	locus=Chr02:2486221:2491454:+	1
aly-miR166h-3p	DACA002672	1	-1	1	21	554	574	UCGGACCAGGCUUCAUUCCCC	::.:::::::::::::::.	CUGGGAUGAAGCCUGGUCCGG	Cleavage	locus=Chr07:12662273:12669644:-	1
aly-miR166h-3p	DACA015668	1	-1	1	21	554	574	UCGGACCAGGCUUCAUUCCCC	::.:::::::::::::::.	CUGGGAUGAAGCCUGGUCCGG	Cleavage	locus=Chr08:11066706:11074546:-	1
aqc-miR166a	DACA015668	1	-1	1	21	554	574	UCGGACCAGGCUUCAUUCCUC	::.:::::::::::::::.	CUGGGAUGAAGCCUGGUCCGG	Cleavage	locus=Chr08:11066706:11074546:-	1
aqc-miR166a	DACA002429	1	-1	1	21	569	589	UCGGACCAGGCUUCAUUCCUC	::.:::::::::::::::.	CCGGGAUGAAGCCUGGUCCGG	Cleavage	locus=Chr11:16707398:16716252:-	1
aqc-miR166a	DACA002672	1	-1	1	21	554	574	UCGGACCAGGCUUCAUUCCUC	::.:::::::::::::::.	CUGGGAUGAAGCCUGGUCCGG	Cleavage	locus=Chr07:12662273:12669644:-	1
aqc-miR166a	DACA015342	1	-1	1	21	569	589	UCGGACCAGGCUUCAUUCCUC	::.:::::::::::::::.	CCGGGAUGAAGCCUGGUCCGG	Cleavage	locus=Chr07:24317952:24325668:-	1
aqc-miR166a	DACA022171	1	-1	1	21	539	559	UCGGACCAGGCUUCAUUCCUC	::.:::::::::::::::.	UUGGGAUGAAGCCUGGUCCGG	Cleavage	locus=Chr02:2486221:2491454:+	1
aqc-miR166b	DACA015342	1	-1	1	21	569	589	UCGGACCAGGCUUCAUUCCCC	::.:::::::::::::::.	CCGGGAUGAAGCCUGGUCCGG	Cleavage	locus=Chr07:24317952:24325668:-	1
aqc-miR166b	DACA002429	1	-1	1	21	569	589	UCGGACCAGGCUUCAUUCCCC	::.:::::::::::::::.	CCGGGAUGAAGCCUGGUCCGG	Cleavage	locus=Chr11:16707398:16716252:-	1
aqc-miR166b	DACA002672	1	-1	1	21	554	574	UCGGACCAGGCUUCAUUCCCC	::.:::::::::::::::.	CUGGGAUGAAGCCUGGUCCGG	Cleavage	locus=Chr07:12662273:12669644:-	1
aqc-miR166b	DACA015668	1	-1	1	21	554	574	UCGGACCAGGCUUCAUUCCCC	::.:::::::::::::::.	CUGGGAUGAAGCCUGGUCCGG	Cleavage	locus=Chr08:11066706:11074546:-	1
aqc-miR166b	DACA022171	1	-1	1	21	539	559	UCGGACCAGGCUUCAUUCCCC	::.:::::::::::::::.	UUGGGAUGAAGCCUGGUCCGG	Cleavage	locus=Chr02:2486221:2491454:+	1
aqc-miR166c	DACA002672	1	-1	1	20	555	574	UCGGACCAGGCUUCAUUCCU	::.:::::::::::::::.	UGGGAUGAAGCCUGGUCCGG	Cleavage	locus=Chr07:12662273:12669644:-	1
aqc-miR166c	DACA015668	1	-1	1	20	555	574	UCGGACCAGGCUUCAUUCCU	::.:::::::::::::::.	UGGGAUGAAGCCUGGUCCGG	Cleavage	locus=Chr08:11066706:11074546:-	1
aqc-miR166c	DACA015342	1	-1	1	20	570	589	UCGGACCAGGCUUCAUUCCU	::.:::::::::::::::.	CGGGAUGAAGCCUGGUCCGG	Cleavage	locus=Chr07:24317952:24325668:-	1
aqc-miR166c	DACA002429	1	-1	1	20	570	589	UCGGACCAGGCUUCAUUCCU	::.:::::::::::::::.	CGGGAUGAAGCCUGGUCCGG	Cleavage	locus=Chr11:16707398:16716252:-	1
aqc-miR166c	DACA022171	1	-1	1	20	540	559	UCGGACCAGGCUUCAUUCCU	::.:::::::::::::::.	UGGGAUGAAGCCUGGUCCGG	Cleavage	locus=Chr02:2486221:2491454:+	1
aqc-miR166d	DACA015668	1	-1	1	21	554	574	UCGGACCAGGCUUCAUUCCUC	::.:::::::::::::::.	CUGGGAUGAAGCCUGGUCCGG	Cleavage	locus=Chr08:11066706:11074546:-	1
aqc-miR166d	DACA015342	1	-1	1	21	569	589	UCGGACCAGGCUUCAUUCCUC	::.:::::::::::::::.	CCGGGAUGAAGCCUGGUCCGG	Cleavage	locus=Chr07:24317952:24325668:-	1
aqc-miR166d	DACA002429	1	-1	1	21	569	589	UCGGACCAGGCUUCAUUCCUC	::.:::::::::::::::.	CCGGGAUGAAGCCUGGUCCGG	Cleavage	locus=Chr11:16707398:16716252:-	1
aqc-miR166d	DACA002672	1	-1	1	21	554	574	UCGGACCAGGCUUCAUUCCUC	::.:::::::::::::::.	CUGGGAUGAAGCCUGGUCCGG	Cleavage	locus=Chr07:12662273:12669644:-	1
aqc-miR166d	DACA022171	1	-1	1	21	539	559	UCGGACCAGGCUUCAUUCCUC	::.:::::::::::::::.	UUGGGAUGAAGCCUGGUCCGG	Cleavage	locus=Chr02:2486221:2491454:+	1
aqc-miR166e	DACA022171	1	-1	1	21	539	559	UCGGACCAGGCUUCAUUCCCC	::.:::::::::::::::.	UUGGGAUGAAGCCUGGUCCGG	Cleavage	locus=Chr02:2486221:2491454:+	1
aqc-miR166e	DACA002672	1	-1	1	21	554	574	UCGGACCAGGCUUCAUUCCCC	::.:::::::::::::::.	CUGGGAUGAAGCCUGGUCCGG	Cleavage	locus=Chr07:12662273:12669644:-	1
aqc-miR166e	DACA015668	1	-1	1	21	554	574	UCGGACCAGGCUUCAUUCCCC	::.:::::::::::::::.	CUGGGAUGAAGCCUGGUCCGG	Cleavage	locus=Chr08:11066706:11074546:-	1
aqc-miR166e	DACA015342	1	-1	1	21	569	589	UCGGACCAGGCUUCAUUCCCC	::.:::::::::::::::.	CCGGGAUGAAGCCUGGUCCGG	Cleavage	locus=Chr07:24317952:24325668:-	1
aqc-miR166e	DACA002429	1	-1	1	21	569	589	UCGGACCAGGCUUCAUUCCCC	::.:::::::::::::::.	CCGGGAUGAAGCCUGGUCCGG	Cleavage	locus=Chr11:16707398:16716252:-	1
ata-miR166a-3p	DACA002429	1	-1	1	21	569	589	UCGGACCAGGCUUCAUUCCCC	::.:::::::::::::::.	CCGGGAUGAAGCCUGGUCCGG	Cleavage	locus=Chr11:16707398:16716252:-	1
ata-miR166a-3p	DACA002672	1	-1	1	21	554	574	UCGGACCAGGCUUCAUUCCCC	::.:::::::::::::::.	CUGGGAUGAAGCCUGGUCCGG	Cleavage	locus=Chr07:12662273:12669644:-	1
ata-miR166a-3p	DACA022171	1	-1	1	21	539	559	UCGGACCAGGCUUCAUUCCCC	::.:::::::::::::::.	UUGGGAUGAAGCCUGGUCCGG	Cleavage	locus=Chr02:2486221:2491454:+	1
ata-miR166a-3p	DACA015668	1	-1	1	21	554	574	UCGGACCAGGCUUCAUUCCCC	::.:::::::::::::::.	CUGGGAUGAAGCCUGGUCCGG	Cleavage	locus=Chr08:11066706:11074546:-	1
ata-miR166a-3p	DACA015342	1	-1	1	21	569	589	UCGGACCAGGCUUCAUUCCCC	::.:::::::::::::::.	CCGGGAUGAAGCCUGGUCCGG	Cleavage	locus=Chr07:24317952:24325668:-	1
ata-miR166b-3p	DACA022171	1	-1	1	21	539	559	UCGGACCAGGCUUCAUUCCCC	::.:::::::::::::::.	UUGGGAUGAAGCCUGGUCCGG	Cleavage	locus=Chr02:2486221:2491454:+	1
ata-miR166b-3p	DACA002672	1	-1	1	21	554	574	UCGGACCAGGCUUCAUUCCCC	::.:::::::::::::::.	CUGGGAUGAAGCCUGGUCCGG	Cleavage	locus=Chr07:12662273:12669644:-	1
ata-miR166b-3p	DACA015668	1	-1	1	21	554	574	UCGGACCAGGCUUCAUUCCCC	::.:::::::::::::::.	CUGGGAUGAAGCCUGGUCCGG	Cleavage	locus=Chr08:11066706:11074546:-	1
ata-miR166b-3p	DACA015342	1	-1	1	21	569	589	UCGGACCAGGCUUCAUUCCCC	::.:::::::::::::::.	CCGGGAUGAAGCCUGGUCCGG	Cleavage	locus=Chr07:24317952:24325668:-	1
ata-miR166b-3p	DACA002429	1	-1	1	21	569	589	UCGGACCAGGCUUCAUUCCCC	::.:::::::::::::::.	CCGGGAUGAAGCCUGGUCCGG	Cleavage	locus=Chr11:16707398:16716252:-	1
ata-miR166c-3p	DACA015668	1	-1	1	21	554	574	UCGGACCAGGCUUCAUUCCUU	::.:::::::::::::::.	CUGGGAUGAAGCCUGGUCCGG	Cleavage	locus=Chr08:11066706:11074546:-	1
ata-miR166c-3p	DACA015342	1	-1	1	21	569	589	UCGGACCAGGCUUCAUUCCUU	::.:::::::::::::::.	CCGGGAUGAAGCCUGGUCCGG	Cleavage	locus=Chr07:24317952:24325668:-	1
ata-miR166c-3p	DACA002429	1	-1	1	21	569	589	UCGGACCAGGCUUCAUUCCUU	::.:::::::::::::::.	CCGGGAUGAAGCCUGGUCCGG	Cleavage	locus=Chr11:16707398:16716252:-	1
ata-miR166c-3p	DACA022171	1	-1	1	21	539	559	UCGGACCAGGCUUCAUUCCUU	::.:::::::::::::::.	UUGGGAUGAAGCCUGGUCCGG	Cleavage	locus=Chr02:2486221:2491454:+	1
ata-miR166c-3p	DACA002672	1	-1	1	21	554	574	UCGGACCAGGCUUCAUUCCUU	::.:::::::::::::::.	CUGGGAUGAAGCCUGGUCCGG	Cleavage	locus=Chr07:12662273:12669644:-	1
ata-miR166d-3p	DACA015668	1	-1	1	21	554	574	UCGGACCAGGCUUCAUUCCCC	::.:::::::::::::::.	CUGGGAUGAAGCCUGGUCCGG	Cleavage	locus=Chr08:11066706:11074546:-	1
ata-miR166d-3p	DACA015342	1	-1	1	21	569	589	UCGGACCAGGCUUCAUUCCCC	::.:::::::::::::::.	CCGGGAUGAAGCCUGGUCCGG	Cleavage	locus=Chr07:24317952:24325668:-	1
ata-miR166d-3p	DACA002429	1	-1	1	21	569	589	UCGGACCAGGCUUCAUUCCCC	::.:::::::::::::::.	CCGGGAUGAAGCCUGGUCCGG	Cleavage	locus=Chr11:16707398:16716252:-	1
ata-miR166d-3p	DACA002672	1	-1	1	21	554	574	UCGGACCAGGCUUCAUUCCCC	::.:::::::::::::::.	CUGGGAUGAAGCCUGGUCCGG	Cleavage	locus=Chr07:12662273:12669644:-	1
ata-miR166d-3p	DACA022171	1	-1	1	21	539	559	UCGGACCAGGCUUCAUUCCCC	::.:::::::::::::::.	UUGGGAUGAAGCCUGGUCCGG	Cleavage	locus=Chr02:2486221:2491454:+	1
ata-miR166e-3p	DACA002672	1	-1	1	21	554	574	UCGGACCAGGCUUCAUUCCCC	::.:::::::::::::::.	CUGGGAUGAAGCCUGGUCCGG	Cleavage	locus=Chr07:12662273:12669644:-	1
ata-miR166e-3p	DACA015342	1	-1	1	21	569	589	UCGGACCAGGCUUCAUUCCCC	::.:::::::::::::::.	CCGGGAUGAAGCCUGGUCCGG	Cleavage	locus=Chr07:24317952:24325668:-	1
ata-miR166e-3p	DACA002429	1	-1	1	21	569	589	UCGGACCAGGCUUCAUUCCCC	::.:::::::::::::::.	CCGGGAUGAAGCCUGGUCCGG	Cleavage	locus=Chr11:16707398:16716252:-	1
ata-miR166e-3p	DACA022171	1	-1	1	21	539	559	UCGGACCAGGCUUCAUUCCCC	::.:::::::::::::::.	UUGGGAUGAAGCCUGGUCCGG	Cleavage	locus=Chr02:2486221:2491454:+	1
ata-miR166e-3p	DACA015668	1	-1	1	21	554	574	UCGGACCAGGCUUCAUUCCCC	::.:::::::::::::::.	CUGGGAUGAAGCCUGGUCCGG	Cleavage	locus=Chr08:11066706:11074546:-	1
ath-miR166a-3p	DACA022171	1	-1	1	21	539	559	UCGGACCAGGCUUCAUUCCCC	::.:::::::::::::::.	UUGGGAUGAAGCCUGGUCCGG	Cleavage	locus=Chr02:2486221:2491454:+	1
ath-miR166a-3p	DACA002672	1	-1	1	21	554	574	UCGGACCAGGCUUCAUUCCCC	::.:::::::::::::::.	CUGGGAUGAAGCCUGGUCCGG	Cleavage	locus=Chr07:12662273:12669644:-	1
ath-miR166a-3p	DACA015668	1	-1	1	21	554	574	UCGGACCAGGCUUCAUUCCCC	::.:::::::::::::::.	CUGGGAUGAAGCCUGGUCCGG	Cleavage	locus=Chr08:11066706:11074546:-	1
ath-miR166a-3p	DACA015342	1	-1	1	21	569	589	UCGGACCAGGCUUCAUUCCCC	::.:::::::::::::::.	CCGGGAUGAAGCCUGGUCCGG	Cleavage	locus=Chr07:24317952:24325668:-	1
ath-miR166a-3p	DACA002429	1	-1	1	21	569	589	UCGGACCAGGCUUCAUUCCCC	::.:::::::::::::::.	CCGGGAUGAAGCCUGGUCCGG	Cleavage	locus=Chr11:16707398:16716252:-	1
ath-miR166b-3p	DACA015342	1	-1	1	21	569	589	UCGGACCAGGCUUCAUUCCCC	::.:::::::::::::::.	CCGGGAUGAAGCCUGGUCCGG	Cleavage	locus=Chr07:24317952:24325668:-	1
ath-miR166b-3p	DACA002429	1	-1	1	21	569	589	UCGGACCAGGCUUCAUUCCCC	::.:::::::::::::::.	CCGGGAUGAAGCCUGGUCCGG	Cleavage	locus=Chr11:16707398:16716252:-	1
ath-miR166b-3p	DACA002672	1	-1	1	21	554	574	UCGGACCAGGCUUCAUUCCCC	::.:::::::::::::::.	CUGGGAUGAAGCCUGGUCCGG	Cleavage	locus=Chr07:12662273:12669644:-	1
ath-miR166b-3p	DACA015668	1	-1	1	21	554	574	UCGGACCAGGCUUCAUUCCCC	::.:::::::::::::::.	CUGGGAUGAAGCCUGGUCCGG	Cleavage	locus=Chr08:11066706:11074546:-	1
ath-miR166b-3p	DACA022171	1	-1	1	21	539	559	UCGGACCAGGCUUCAUUCCCC	::.:::::::::::::::.	UUGGGAUGAAGCCUGGUCCGG	Cleavage	locus=Chr02:2486221:2491454:+	1
ath-miR166c	DACA015668	1	-1	1	21	554	574	UCGGACCAGGCUUCAUUCCCC	::.:::::::::::::::.	CUGGGAUGAAGCCUGGUCCGG	Cleavage	locus=Chr08:11066706:11074546:-	1
ath-miR166c	DACA002672	1	-1	1	21	554	574	UCGGACCAGGCUUCAUUCCCC	::.:::::::::::::::.	CUGGGAUGAAGCCUGGUCCGG	Cleavage	locus=Chr07:12662273:12669644:-	1
ath-miR166c	DACA022171	1	-1	1	21	539	559	UCGGACCAGGCUUCAUUCCCC	::.:::::::::::::::.	UUGGGAUGAAGCCUGGUCCGG	Cleavage	locus=Chr02:2486221:2491454:+	1
ath-miR166c	DACA015342	1	-1	1	21	569	589	UCGGACCAGGCUUCAUUCCCC	::.:::::::::::::::.	CCGGGAUGAAGCCUGGUCCGG	Cleavage	locus=Chr07:24317952:24325668:-	1
ath-miR166c	DACA002429	1	-1	1	21	569	589	UCGGACCAGGCUUCAUUCCCC	::.:::::::::::::::.	CCGGGAUGAAGCCUGGUCCGG	Cleavage	locus=Chr11:16707398:16716252:-	1
ath-miR166d	DACA022171	1	-1	1	21	539	559	UCGGACCAGGCUUCAUUCCCC	::.:::::::::::::::.	UUGGGAUGAAGCCUGGUCCGG	Cleavage	locus=Chr02:2486221:2491454:+	1
ath-miR166d	DACA002672	1	-1	1	21	554	574	UCGGACCAGGCUUCAUUCCCC	::.:::::::::::::::.	CUGGGAUGAAGCCUGGUCCGG	Cleavage	locus=Chr07:12662273:12669644:-	1
ath-miR166d	DACA015668	1	-1	1	21	554	574	UCGGACCAGGCUUCAUUCCCC	::.:::::::::::::::.	CUGGGAUGAAGCCUGGUCCGG	Cleavage	locus=Chr08:11066706:11074546:-	1
ath-miR166d	DACA015342	1	-1	1	21	569	589	UCGGACCAGGCUUCAUUCCCC	::.:::::::::::::::.	CCGGGAUGAAGCCUGGUCCGG	Cleavage	locus=Chr07:24317952:24325668:-	1
ath-miR166d	DACA002429	1	-1	1	21	569	589	UCGGACCAGGCUUCAUUCCCC	::.:::::::::::::::.	CCGGGAUGAAGCCUGGUCCGG	Cleavage	locus=Chr11:16707398:16716252:-	1
ath-miR166e-3p	DACA002672	1	-1	1	21	554	574	UCGGACCAGGCUUCAUUCCCC	::.:::::::::::::::.	CUGGGAUGAAGCCUGGUCCGG	Cleavage	locus=Chr07:12662273:12669644:-	1
ath-miR166e-3p	DACA022171	1	-1	1	21	539	559	UCGGACCAGGCUUCAUUCCCC	::.:::::::::::::::.	UUGGGAUGAAGCCUGGUCCGG	Cleavage	locus=Chr02:2486221:2491454:+	1
ath-miR166e-3p	DACA015668	1	-1	1	21	554	574	UCGGACCAGGCUUCAUUCCCC	::.:::::::::::::::.	CUGGGAUGAAGCCUGGUCCGG	Cleavage	locus=Chr08:11066706:11074546:-	1
ath-miR166e-3p	DACA015342	1	-1	1	21	569	589	UCGGACCAGGCUUCAUUCCCC	::.:::::::::::::::.	CCGGGAUGAAGCCUGGUCCGG	Cleavage	locus=Chr07:24317952:24325668:-	1
ath-miR166e-3p	DACA002429	1	-1	1	21	569	589	UCGGACCAGGCUUCAUUCCCC	::.:::::::::::::::.	CCGGGAUGAAGCCUGGUCCGG	Cleavage	locus=Chr11:16707398:16716252:-	1
ath-miR166f	DACA015668	1	-1	1	21	554	574	UCGGACCAGGCUUCAUUCCCC	::.:::::::::::::::.	CUGGGAUGAAGCCUGGUCCGG	Cleavage	locus=Chr08:11066706:11074546:-	1
ath-miR166f	DACA002672	1	-1	1	21	554	574	UCGGACCAGGCUUCAUUCCCC	::.:::::::::::::::.	CUGGGAUGAAGCCUGGUCCGG	Cleavage	locus=Chr07:12662273:12669644:-	1
ath-miR166f	DACA022171	1	-1	1	21	539	559	UCGGACCAGGCUUCAUUCCCC	::.:::::::::::::::.	UUGGGAUGAAGCCUGGUCCGG	Cleavage	locus=Chr02:2486221:2491454:+	1
ath-miR166f	DACA015342	1	-1	1	21	569	589	UCGGACCAGGCUUCAUUCCCC	::.:::::::::::::::.	CCGGGAUGAAGCCUGGUCCGG	Cleavage	locus=Chr07:24317952:24325668:-	1
ath-miR166f	DACA002429	1	-1	1	21	569	589	UCGGACCAGGCUUCAUUCCCC	::.:::::::::::::::.	CCGGGAUGAAGCCUGGUCCGG	Cleavage	locus=Chr11:16707398:16716252:-	1
ath-miR166g	DACA002429	1	-1	1	21	569	589	UCGGACCAGGCUUCAUUCCCC	::.:::::::::::::::.	CCGGGAUGAAGCCUGGUCCGG	Cleavage	locus=Chr11:16707398:16716252:-	1
ath-miR166g	DACA022171	1	-1	1	21	539	559	UCGGACCAGGCUUCAUUCCCC	::.:::::::::::::::.	UUGGGAUGAAGCCUGGUCCGG	Cleavage	locus=Chr02:2486221:2491454:+	1
ath-miR166g	DACA002672	1	-1	1	21	554	574	UCGGACCAGGCUUCAUUCCCC	::.:::::::::::::::.	CUGGGAUGAAGCCUGGUCCGG	Cleavage	locus=Chr07:12662273:12669644:-	1
ath-miR166g	DACA015668	1	-1	1	21	554	574	UCGGACCAGGCUUCAUUCCCC	::.:::::::::::::::.	CUGGGAUGAAGCCUGGUCCGG	Cleavage	locus=Chr08:11066706:11074546:-	1
ath-miR166g	DACA015342	1	-1	1	21	569	589	UCGGACCAGGCUUCAUUCCCC	::.:::::::::::::::.	CCGGGAUGAAGCCUGGUCCGG	Cleavage	locus=Chr07:24317952:24325668:-	1
bdi-miR166a-3p	DACA022171	1	-1	1	21	539	559	UCGGACCAGGCUUCAUUCCCC	::.:::::::::::::::.	UUGGGAUGAAGCCUGGUCCGG	Cleavage	locus=Chr02:2486221:2491454:+	1
bdi-miR166a-3p	DACA002672	1	-1	1	21	554	574	UCGGACCAGGCUUCAUUCCCC	::.:::::::::::::::.	CUGGGAUGAAGCCUGGUCCGG	Cleavage	locus=Chr07:12662273:12669644:-	1
bdi-miR166a-3p	DACA015668	1	-1	1	21	554	574	UCGGACCAGGCUUCAUUCCCC	::.:::::::::::::::.	CUGGGAUGAAGCCUGGUCCGG	Cleavage	locus=Chr08:11066706:11074546:-	1
bdi-miR166a-3p	DACA015342	1	-1	1	21	569	589	UCGGACCAGGCUUCAUUCCCC	::.:::::::::::::::.	CCGGGAUGAAGCCUGGUCCGG	Cleavage	locus=Chr07:24317952:24325668:-	1
bdi-miR166a-3p	DACA002429	1	-1	1	21	569	589	UCGGACCAGGCUUCAUUCCCC	::.:::::::::::::::.	CCGGGAUGAAGCCUGGUCCGG	Cleavage	locus=Chr11:16707398:16716252:-	1
bdi-miR166b-3p	DACA015342	1	-1	1	21	569	589	UCGGACCAGGCUUCAUUCCCC	::.:::::::::::::::.	CCGGGAUGAAGCCUGGUCCGG	Cleavage	locus=Chr07:24317952:24325668:-	1
bdi-miR166b-3p	DACA002429	1	-1	1	21	569	589	UCGGACCAGGCUUCAUUCCCC	::.:::::::::::::::.	CCGGGAUGAAGCCUGGUCCGG	Cleavage	locus=Chr11:16707398:16716252:-	1
bdi-miR166b-3p	DACA002672	1	-1	1	21	554	574	UCGGACCAGGCUUCAUUCCCC	::.:::::::::::::::.	CUGGGAUGAAGCCUGGUCCGG	Cleavage	locus=Chr07:12662273:12669644:-	1
bdi-miR166b-3p	DACA022171	1	-1	1	21	539	559	UCGGACCAGGCUUCAUUCCCC	::.:::::::::::::::.	UUGGGAUGAAGCCUGGUCCGG	Cleavage	locus=Chr02:2486221:2491454:+	1
bdi-miR166b-3p	DACA015668	1	-1	1	21	554	574	UCGGACCAGGCUUCAUUCCCC	::.:::::::::::::::.	CUGGGAUGAAGCCUGGUCCGG	Cleavage	locus=Chr08:11066706:11074546:-	1
bdi-miR166c-3p	DACA022171	1	-1	1	21	539	559	UCGGACCAGGCUUCAUUCCCC	::.:::::::::::::::.	UUGGGAUGAAGCCUGGUCCGG	Cleavage	locus=Chr02:2486221:2491454:+	1
bdi-miR166c-3p	DACA015668	1	-1	1	21	554	574	UCGGACCAGGCUUCAUUCCCC	::.:::::::::::::::.	CUGGGAUGAAGCCUGGUCCGG	Cleavage	locus=Chr08:11066706:11074546:-	1
bdi-miR166c-3p	DACA015342	1	-1	1	21	569	589	UCGGACCAGGCUUCAUUCCCC	::.:::::::::::::::.	CCGGGAUGAAGCCUGGUCCGG	Cleavage	locus=Chr07:24317952:24325668:-	1
bdi-miR166c-3p	DACA002429	1	-1	1	21	569	589	UCGGACCAGGCUUCAUUCCCC	::.:::::::::::::::.	CCGGGAUGAAGCCUGGUCCGG	Cleavage	locus=Chr11:16707398:16716252:-	1
bdi-miR166c-3p	DACA002672	1	-1	1	21	554	574	UCGGACCAGGCUUCAUUCCCC	::.:::::::::::::::.	CUGGGAUGAAGCCUGGUCCGG	Cleavage	locus=Chr07:12662273:12669644:-	1
bdi-miR166d-3p	DACA015668	1	-1	1	21	554	574	UCGGACCAGGCUUCAUUCCCC	::.:::::::::::::::.	CUGGGAUGAAGCCUGGUCCGG	Cleavage	locus=Chr08:11066706:11074546:-	1
bdi-miR166d-3p	DACA015342	1	-1	1	21	569	589	UCGGACCAGGCUUCAUUCCCC	::.:::::::::::::::.	CCGGGAUGAAGCCUGGUCCGG	Cleavage	locus=Chr07:24317952:24325668:-	1
bdi-miR166d-3p	DACA002429	1	-1	1	21	569	589	UCGGACCAGGCUUCAUUCCCC	::.:::::::::::::::.	CCGGGAUGAAGCCUGGUCCGG	Cleavage	locus=Chr11:16707398:16716252:-	1
bdi-miR166d-3p	DACA002672	1	-1	1	21	554	574	UCGGACCAGGCUUCAUUCCCC	::.:::::::::::::::.	CUGGGAUGAAGCCUGGUCCGG	Cleavage	locus=Chr07:12662273:12669644:-	1
bdi-miR166d-3p	DACA022171	1	-1	1	21	539	559	UCGGACCAGGCUUCAUUCCCC	::.:::::::::::::::.	UUGGGAUGAAGCCUGGUCCGG	Cleavage	locus=Chr02:2486221:2491454:+	1
bdi-miR166i-3p	DACA022171	1	-1	1	21	539	559	UCGGACCAGGCUUCAUUCCCC	::.:::::::::::::::.	UUGGGAUGAAGCCUGGUCCGG	Cleavage	locus=Chr02:2486221:2491454:+	1
bdi-miR166i-3p	DACA015668	1	-1	1	21	554	574	UCGGACCAGGCUUCAUUCCCC	::.:::::::::::::::.	CUGGGAUGAAGCCUGGUCCGG	Cleavage	locus=Chr08:11066706:11074546:-	1
bdi-miR166i-3p	DACA002672	1	-1	1	21	554	574	UCGGACCAGGCUUCAUUCCCC	::.:::::::::::::::.	CUGGGAUGAAGCCUGGUCCGG	Cleavage	locus=Chr07:12662273:12669644:-	1
bdi-miR166i-3p	DACA015342	1	-1	1	21	569	589	UCGGACCAGGCUUCAUUCCCC	::.:::::::::::::::.	CCGGGAUGAAGCCUGGUCCGG	Cleavage	locus=Chr07:24317952:24325668:-	1
bdi-miR166i-3p	DACA002429	1	-1	1	21	569	589	UCGGACCAGGCUUCAUUCCCC	::.:::::::::::::::.	CCGGGAUGAAGCCUGGUCCGG	Cleavage	locus=Chr11:16707398:16716252:-	1
bdi-miR166j	DACA002672	1	-1	1	21	554	574	UCGGACCAGGCUUCAUUCCUU	::.:::::::::::::::.	CUGGGAUGAAGCCUGGUCCGG	Cleavage	locus=Chr07:12662273:12669644:-	1
bdi-miR166j	DACA022171	1	-1	1	21	539	559	UCGGACCAGGCUUCAUUCCUU	::.:::::::::::::::.	UUGGGAUGAAGCCUGGUCCGG	Cleavage	locus=Chr02:2486221:2491454:+	1
bdi-miR166j	DACA015668	1	-1	1	21	554	574	UCGGACCAGGCUUCAUUCCUU	::.:::::::::::::::.	CUGGGAUGAAGCCUGGUCCGG	Cleavage	locus=Chr08:11066706:11074546:-	1
bdi-miR166j	DACA015342	1	-1	1	21	569	589	UCGGACCAGGCUUCAUUCCUU	::.:::::::::::::::.	CCGGGAUGAAGCCUGGUCCGG	Cleavage	locus=Chr07:24317952:24325668:-	1
bdi-miR166j	DACA002429	1	-1	1	21	569	589	UCGGACCAGGCUUCAUUCCUU	::.:::::::::::::::.	CCGGGAUGAAGCCUGGUCCGG	Cleavage	locus=Chr11:16707398:16716252:-	1
bna-miR166a	DACA002429	1	-1	1	21	569	589	UCGGACCAGGCUUCAUUCCCC	::.:::::::::::::::.	CCGGGAUGAAGCCUGGUCCGG	Cleavage	locus=Chr11:16707398:16716252:-	1
bna-miR166a	DACA015668	1	-1	1	21	554	574	UCGGACCAGGCUUCAUUCCCC	::.:::::::::::::::.	CUGGGAUGAAGCCUGGUCCGG	Cleavage	locus=Chr08:11066706:11074546:-	1
bna-miR166a	DACA015342	1	-1	1	21	569	589	UCGGACCAGGCUUCAUUCCCC	::.:::::::::::::::.	CCGGGAUGAAGCCUGGUCCGG	Cleavage	locus=Chr07:24317952:24325668:-	1
bna-miR166a	DACA022171	1	-1	1	21	539	559	UCGGACCAGGCUUCAUUCCCC	::.:::::::::::::::.	UUGGGAUGAAGCCUGGUCCGG	Cleavage	locus=Chr02:2486221:2491454:+	1
bna-miR166a	DACA002672	1	-1	1	21	554	574	UCGGACCAGGCUUCAUUCCCC	::.:::::::::::::::.	CUGGGAUGAAGCCUGGUCCGG	Cleavage	locus=Chr07:12662273:12669644:-	1
bna-miR166b	DACA015668	1	-1	1	21	554	574	UCGGACCAGGCUUCAUUCCCC	::.:::::::::::::::.	CUGGGAUGAAGCCUGGUCCGG	Cleavage	locus=Chr08:11066706:11074546:-	1
bna-miR166b	DACA015342	1	-1	1	21	569	589	UCGGACCAGGCUUCAUUCCCC	::.:::::::::::::::.	CCGGGAUGAAGCCUGGUCCGG	Cleavage	locus=Chr07:24317952:24325668:-	1
bna-miR166b	DACA022171	1	-1	1	21	539	559	UCGGACCAGGCUUCAUUCCCC	::.:::::::::::::::.	UUGGGAUGAAGCCUGGUCCGG	Cleavage	locus=Chr02:2486221:2491454:+	1
bna-miR166b	DACA002429	1	-1	1	21	569	589	UCGGACCAGGCUUCAUUCCCC	::.:::::::::::::::.	CCGGGAUGAAGCCUGGUCCGG	Cleavage	locus=Chr11:16707398:16716252:-	1
bna-miR166b	DACA002672	1	-1	1	21	554	574	UCGGACCAGGCUUCAUUCCCC	::.:::::::::::::::.	CUGGGAUGAAGCCUGGUCCGG	Cleavage	locus=Chr07:12662273:12669644:-	1
bna-miR166c	DACA015668	1	-1	1	21	554	574	UCGGACCAGGCUUCAUUCCCC	::.:::::::::::::::.	CUGGGAUGAAGCCUGGUCCGG	Cleavage	locus=Chr08:11066706:11074546:-	1
bna-miR166c	DACA002429	1	-1	1	21	569	589	UCGGACCAGGCUUCAUUCCCC	::.:::::::::::::::.	CCGGGAUGAAGCCUGGUCCGG	Cleavage	locus=Chr11:16707398:16716252:-	1
bna-miR166c	DACA002672	1	-1	1	21	554	574	UCGGACCAGGCUUCAUUCCCC	::.:::::::::::::::.	CUGGGAUGAAGCCUGGUCCGG	Cleavage	locus=Chr07:12662273:12669644:-	1
bna-miR166c	DACA015342	1	-1	1	21	569	589	UCGGACCAGGCUUCAUUCCCC	::.:::::::::::::::.	CCGGGAUGAAGCCUGGUCCGG	Cleavage	locus=Chr07:24317952:24325668:-	1
bna-miR166c	DACA022171	1	-1	1	21	539	559	UCGGACCAGGCUUCAUUCCCC	::.:::::::::::::::.	UUGGGAUGAAGCCUGGUCCGG	Cleavage	locus=Chr02:2486221:2491454:+	1
bna-miR166d	DACA002429	1	-1	1	21	569	589	UCGGACCAGGCUUCAUUCCCC	::.:::::::::::::::.	CCGGGAUGAAGCCUGGUCCGG	Cleavage	locus=Chr11:16707398:16716252:-	1
bna-miR166d	DACA015668	1	-1	1	21	554	574	UCGGACCAGGCUUCAUUCCCC	::.:::::::::::::::.	CUGGGAUGAAGCCUGGUCCGG	Cleavage	locus=Chr08:11066706:11074546:-	1
bna-miR166d	DACA015342	1	-1	1	21	569	589	UCGGACCAGGCUUCAUUCCCC	::.:::::::::::::::.	CCGGGAUGAAGCCUGGUCCGG	Cleavage	locus=Chr07:24317952:24325668:-	1
bna-miR166d	DACA002672	1	-1	1	21	554	574	UCGGACCAGGCUUCAUUCCCC	::.:::::::::::::::.	CUGGGAUGAAGCCUGGUCCGG	Cleavage	locus=Chr07:12662273:12669644:-	1
bna-miR166d	DACA022171	1	-1	1	21	539	559	UCGGACCAGGCUUCAUUCCCC	::.:::::::::::::::.	UUGGGAUGAAGCCUGGUCCGG	Cleavage	locus=Chr02:2486221:2491454:+	1
bna-miR166e	DACA002672	1	-1	1	21	554	574	UCGGACCAGGCUUCAUUCCCC	::.:::::::::::::::.	CUGGGAUGAAGCCUGGUCCGG	Cleavage	locus=Chr07:12662273:12669644:-	1
bna-miR166e	DACA022171	1	-1	1	21	539	559	UCGGACCAGGCUUCAUUCCCC	::.:::::::::::::::.	UUGGGAUGAAGCCUGGUCCGG	Cleavage	locus=Chr02:2486221:2491454:+	1
bna-miR166e	DACA015668	1	-1	1	21	554	574	UCGGACCAGGCUUCAUUCCCC	::.:::::::::::::::.	CUGGGAUGAAGCCUGGUCCGG	Cleavage	locus=Chr08:11066706:11074546:-	1
bna-miR166e	DACA015342	1	-1	1	21	569	589	UCGGACCAGGCUUCAUUCCCC	::.:::::::::::::::.	CCGGGAUGAAGCCUGGUCCGG	Cleavage	locus=Chr07:24317952:24325668:-	1
bna-miR166e	DACA002429	1	-1	1	21	569	589	UCGGACCAGGCUUCAUUCCCC	::.:::::::::::::::.	CCGGGAUGAAGCCUGGUCCGG	Cleavage	locus=Chr11:16707398:16716252:-	1
cme-miR166a	DACA022171	1	-1	1	21	539	559	UCGGACCAGGCUUCAUUCCCC	::.:::::::::::::::.	UUGGGAUGAAGCCUGGUCCGG	Cleavage	locus=Chr02:2486221:2491454:+	1
cme-miR166a	DACA015342	1	-1	1	21	569	589	UCGGACCAGGCUUCAUUCCCC	::.:::::::::::::::.	CCGGGAUGAAGCCUGGUCCGG	Cleavage	locus=Chr07:24317952:24325668:-	1
cme-miR166a	DACA002429	1	-1	1	21	569	589	UCGGACCAGGCUUCAUUCCCC	::.:::::::::::::::.	CCGGGAUGAAGCCUGGUCCGG	Cleavage	locus=Chr11:16707398:16716252:-	1
cme-miR166a	DACA002672	1	-1	1	21	554	574	UCGGACCAGGCUUCAUUCCCC	::.:::::::::::::::.	CUGGGAUGAAGCCUGGUCCGG	Cleavage	locus=Chr07:12662273:12669644:-	1
cme-miR166a	DACA015668	1	-1	1	21	554	574	UCGGACCAGGCUUCAUUCCCC	::.:::::::::::::::.	CUGGGAUGAAGCCUGGUCCGG	Cleavage	locus=Chr08:11066706:11074546:-	1
cme-miR166b	DACA015668	1	-1	1	21	554	574	UCGGACCAGGCUUCAUUCCCC	::.:::::::::::::::.	CUGGGAUGAAGCCUGGUCCGG	Cleavage	locus=Chr08:11066706:11074546:-	1
cme-miR166b	DACA015342	1	-1	1	21	569	589	UCGGACCAGGCUUCAUUCCCC	::.:::::::::::::::.	CCGGGAUGAAGCCUGGUCCGG	Cleavage	locus=Chr07:24317952:24325668:-	1
cme-miR166b	DACA002429	1	-1	1	21	569	589	UCGGACCAGGCUUCAUUCCCC	::.:::::::::::::::.	CCGGGAUGAAGCCUGGUCCGG	Cleavage	locus=Chr11:16707398:16716252:-	1
cme-miR166b	DACA022171	1	-1	1	21	539	559	UCGGACCAGGCUUCAUUCCCC	::.:::::::::::::::.	UUGGGAUGAAGCCUGGUCCGG	Cleavage	locus=Chr02:2486221:2491454:+	1
cme-miR166b	DACA002672	1	-1	1	21	554	574	UCGGACCAGGCUUCAUUCCCC	::.:::::::::::::::.	CUGGGAUGAAGCCUGGUCCGG	Cleavage	locus=Chr07:12662273:12669644:-	1
cme-miR166c	DACA002672	1	-1	1	21	554	574	UCGGACCAGGCUUCAUUCCCC	::.:::::::::::::::.	CUGGGAUGAAGCCUGGUCCGG	Cleavage	locus=Chr07:12662273:12669644:-	1
cme-miR166c	DACA015668	1	-1	1	21	554	574	UCGGACCAGGCUUCAUUCCCC	::.:::::::::::::::.	CUGGGAUGAAGCCUGGUCCGG	Cleavage	locus=Chr08:11066706:11074546:-	1
cme-miR166c	DACA015342	1	-1	1	21	569	589	UCGGACCAGGCUUCAUUCCCC	::.:::::::::::::::.	CCGGGAUGAAGCCUGGUCCGG	Cleavage	locus=Chr07:24317952:24325668:-	1
cme-miR166c	DACA002429	1	-1	1	21	569	589	UCGGACCAGGCUUCAUUCCCC	::.:::::::::::::::.	CCGGGAUGAAGCCUGGUCCGG	Cleavage	locus=Chr11:16707398:16716252:-	1
cme-miR166c	DACA022171	1	-1	1	21	539	559	UCGGACCAGGCUUCAUUCCCC	::.:::::::::::::::.	UUGGGAUGAAGCCUGGUCCGG	Cleavage	locus=Chr02:2486221:2491454:+	1
cme-miR166d	DACA015668	1	-1	1	21	554	574	UCGGACCAGGCUUCAUUCCCC	::.:::::::::::::::.	CUGGGAUGAAGCCUGGUCCGG	Cleavage	locus=Chr08:11066706:11074546:-	1
cme-miR166d	DACA015342	1	-1	1	21	569	589	UCGGACCAGGCUUCAUUCCCC	::.:::::::::::::::.	CCGGGAUGAAGCCUGGUCCGG	Cleavage	locus=Chr07:24317952:24325668:-	1
cme-miR166d	DACA002429	1	-1	1	21	569	589	UCGGACCAGGCUUCAUUCCCC	::.:::::::::::::::.	CCGGGAUGAAGCCUGGUCCGG	Cleavage	locus=Chr11:16707398:16716252:-	1
cme-miR166d	DACA002672	1	-1	1	21	554	574	UCGGACCAGGCUUCAUUCCCC	::.:::::::::::::::.	CUGGGAUGAAGCCUGGUCCGG	Cleavage	locus=Chr07:12662273:12669644:-	1
cme-miR166d	DACA022171	1	-1	1	21	539	559	UCGGACCAGGCUUCAUUCCCC	::.:::::::::::::::.	UUGGGAUGAAGCCUGGUCCGG	Cleavage	locus=Chr02:2486221:2491454:+	1
cme-miR166e	DACA015668	1	-1	1	21	554	574	UCGGACCAGGCUUCAUUCCUC	::.:::::::::::::::.	CUGGGAUGAAGCCUGGUCCGG	Cleavage	locus=Chr08:11066706:11074546:-	1
cme-miR166e	DACA015342	1	-1	1	21	569	589	UCGGACCAGGCUUCAUUCCUC	::.:::::::::::::::.	CCGGGAUGAAGCCUGGUCCGG	Cleavage	locus=Chr07:24317952:24325668:-	1
cme-miR166e	DACA002429	1	-1	1	21	569	589	UCGGACCAGGCUUCAUUCCUC	::.:::::::::::::::.	CCGGGAUGAAGCCUGGUCCGG	Cleavage	locus=Chr11:16707398:16716252:-	1
cme-miR166e	DACA002672	1	-1	1	21	554	574	UCGGACCAGGCUUCAUUCCUC	::.:::::::::::::::.	CUGGGAUGAAGCCUGGUCCGG	Cleavage	locus=Chr07:12662273:12669644:-	1
cme-miR166e	DACA022171	1	-1	1	21	539	559	UCGGACCAGGCUUCAUUCCUC	::.:::::::::::::::.	UUGGGAUGAAGCCUGGUCCGG	Cleavage	locus=Chr02:2486221:2491454:+	1
cme-miR166f	DACA002672	1	-1	1	21	554	574	UCGGACCAGGCUUCAUUCCCC	::.:::::::::::::::.	CUGGGAUGAAGCCUGGUCCGG	Cleavage	locus=Chr07:12662273:12669644:-	1
cme-miR166f	DACA015668	1	-1	1	21	554	574	UCGGACCAGGCUUCAUUCCCC	::.:::::::::::::::.	CUGGGAUGAAGCCUGGUCCGG	Cleavage	locus=Chr08:11066706:11074546:-	1
cme-miR166f	DACA015342	1	-1	1	21	569	589	UCGGACCAGGCUUCAUUCCCC	::.:::::::::::::::.	CCGGGAUGAAGCCUGGUCCGG	Cleavage	locus=Chr07:24317952:24325668:-	1
cme-miR166f	DACA002429	1	-1	1	21	569	589	UCGGACCAGGCUUCAUUCCCC	::.:::::::::::::::.	CCGGGAUGAAGCCUGGUCCGG	Cleavage	locus=Chr11:16707398:16716252:-	1
cme-miR166f	DACA022171	1	-1	1	21	539	559	UCGGACCAGGCUUCAUUCCCC	::.:::::::::::::::.	UUGGGAUGAAGCCUGGUCCGG	Cleavage	locus=Chr02:2486221:2491454:+	1
cme-miR166g	DACA015668	1	-1	1	20	555	574	UCGGACCAGGCUUCAUUCCC	::.:::::::::::::::.	UGGGAUGAAGCCUGGUCCGG	Cleavage	locus=Chr08:11066706:11074546:-	1
cme-miR166g	DACA015342	1	-1	1	20	570	589	UCGGACCAGGCUUCAUUCCC	::.:::::::::::::::.	CGGGAUGAAGCCUGGUCCGG	Cleavage	locus=Chr07:24317952:24325668:-	1
cme-miR166g	DACA022171	1	-1	1	20	540	559	UCGGACCAGGCUUCAUUCCC	::.:::::::::::::::.	UGGGAUGAAGCCUGGUCCGG	Cleavage	locus=Chr02:2486221:2491454:+	1
cme-miR166g	DACA002429	1	-1	1	20	570	589	UCGGACCAGGCUUCAUUCCC	::.:::::::::::::::.	CGGGAUGAAGCCUGGUCCGG	Cleavage	locus=Chr11:16707398:16716252:-	1
cme-miR166g	DACA002672	1	-1	1	20	555	574	UCGGACCAGGCUUCAUUCCC	::.:::::::::::::::.	UGGGAUGAAGCCUGGUCCGG	Cleavage	locus=Chr07:12662273:12669644:-	1
cme-miR166h	DACA002429	1	-1	1	21	569	589	UCGGACCAGGCUUCAUUCCCC	::.:::::::::::::::.	CCGGGAUGAAGCCUGGUCCGG	Cleavage	locus=Chr11:16707398:16716252:-	1
cme-miR166h	DACA022171	1	-1	1	21	539	559	UCGGACCAGGCUUCAUUCCCC	::.:::::::::::::::.	UUGGGAUGAAGCCUGGUCCGG	Cleavage	locus=Chr02:2486221:2491454:+	1
cme-miR166h	DACA002672	1	-1	1	21	554	574	UCGGACCAGGCUUCAUUCCCC	::.:::::::::::::::.	CUGGGAUGAAGCCUGGUCCGG	Cleavage	locus=Chr07:12662273:12669644:-	1
cme-miR166h	DACA015668	1	-1	1	21	554	574	UCGGACCAGGCUUCAUUCCCC	::.:::::::::::::::.	CUGGGAUGAAGCCUGGUCCGG	Cleavage	locus=Chr08:11066706:11074546:-	1
cme-miR166h	DACA015342	1	-1	1	21	569	589	UCGGACCAGGCUUCAUUCCCC	::.:::::::::::::::.	CCGGGAUGAAGCCUGGUCCGG	Cleavage	locus=Chr07:24317952:24325668:-	1
cpa-miR166a	DACA002672	1	-1	1	21	554	574	UCGGACCAGGCUUCAUUCCCC	::.:::::::::::::::.	CUGGGAUGAAGCCUGGUCCGG	Cleavage	locus=Chr07:12662273:12669644:-	1
cpa-miR166a	DACA022171	1	-1	1	21	539	559	UCGGACCAGGCUUCAUUCCCC	::.:::::::::::::::.	UUGGGAUGAAGCCUGGUCCGG	Cleavage	locus=Chr02:2486221:2491454:+	1
cpa-miR166a	DACA015668	1	-1	1	21	554	574	UCGGACCAGGCUUCAUUCCCC	::.:::::::::::::::.	CUGGGAUGAAGCCUGGUCCGG	Cleavage	locus=Chr08:11066706:11074546:-	1
cpa-miR166a	DACA015342	1	-1	1	21	569	589	UCGGACCAGGCUUCAUUCCCC	::.:::::::::::::::.	CCGGGAUGAAGCCUGGUCCGG	Cleavage	locus=Chr07:24317952:24325668:-	1
cpa-miR166a	DACA002429	1	-1	1	21	569	589	UCGGACCAGGCUUCAUUCCCC	::.:::::::::::::::.	CCGGGAUGAAGCCUGGUCCGG	Cleavage	locus=Chr11:16707398:16716252:-	1
cpa-miR166b	DACA002429	1	-1	1	21	569	589	UCGGACCAGGCUUCAUUCCCC	::.:::::::::::::::.	CCGGGAUGAAGCCUGGUCCGG	Cleavage	locus=Chr11:16707398:16716252:-	1
cpa-miR166b	DACA015668	1	-1	1	21	554	574	UCGGACCAGGCUUCAUUCCCC	::.:::::::::::::::.	CUGGGAUGAAGCCUGGUCCGG	Cleavage	locus=Chr08:11066706:11074546:-	1
cpa-miR166b	DACA015342	1	-1	1	21	569	589	UCGGACCAGGCUUCAUUCCCC	::.:::::::::::::::.	CCGGGAUGAAGCCUGGUCCGG	Cleavage	locus=Chr07:24317952:24325668:-	1
cpa-miR166b	DACA022171	1	-1	1	21	539	559	UCGGACCAGGCUUCAUUCCCC	::.:::::::::::::::.	UUGGGAUGAAGCCUGGUCCGG	Cleavage	locus=Chr02:2486221:2491454:+	1
cpa-miR166b	DACA002672	1	-1	1	21	554	574	UCGGACCAGGCUUCAUUCCCC	::.:::::::::::::::.	CUGGGAUGAAGCCUGGUCCGG	Cleavage	locus=Chr07:12662273:12669644:-	1
cpa-miR166c	DACA015668	1	-1	1	21	554	574	UCGGACCAGGCUUCAUUCCCC	::.:::::::::::::::.	CUGGGAUGAAGCCUGGUCCGG	Cleavage	locus=Chr08:11066706:11074546:-	1
cpa-miR166c	DACA015342	1	-1	1	21	569	589	UCGGACCAGGCUUCAUUCCCC	::.:::::::::::::::.	CCGGGAUGAAGCCUGGUCCGG	Cleavage	locus=Chr07:24317952:24325668:-	1
cpa-miR166c	DACA002429	1	-1	1	21	569	589	UCGGACCAGGCUUCAUUCCCC	::.:::::::::::::::.	CCGGGAUGAAGCCUGGUCCGG	Cleavage	locus=Chr11:16707398:16716252:-	1
cpa-miR166c	DACA022171	1	-1	1	21	539	559	UCGGACCAGGCUUCAUUCCCC	::.:::::::::::::::.	UUGGGAUGAAGCCUGGUCCGG	Cleavage	locus=Chr02:2486221:2491454:+	1
cpa-miR166c	DACA002672	1	-1	1	21	554	574	UCGGACCAGGCUUCAUUCCCC	::.:::::::::::::::.	CUGGGAUGAAGCCUGGUCCGG	Cleavage	locus=Chr07:12662273:12669644:-	1
cpa-miR166d	DACA015668	1	-1	1	21	554	574	UCGGACCAGGCUUCAUUCCCG	: ::.:::::::::::::::.	CUGGGAUGAAGCCUGGUCCGG	Cleavage	locus=Chr08:11066706:11074546:-	1
cpa-miR166d	DACA015342	1	-1	1	21	569	589	UCGGACCAGGCUUCAUUCCCG	: ::.:::::::::::::::.	CCGGGAUGAAGCCUGGUCCGG	Cleavage	locus=Chr07:24317952:24325668:-	1
cpa-miR166d	DACA002429	1	-1	1	21	569	589	UCGGACCAGGCUUCAUUCCCG	: ::.:::::::::::::::.	CCGGGAUGAAGCCUGGUCCGG	Cleavage	locus=Chr11:16707398:16716252:-	1
cpa-miR166d	DACA002672	1	-1	1	21	554	574	UCGGACCAGGCUUCAUUCCCG	: ::.:::::::::::::::.	CUGGGAUGAAGCCUGGUCCGG	Cleavage	locus=Chr07:12662273:12669644:-	1
cpa-miR166d	DACA022171	1	-1	1	21	539	559	UCGGACCAGGCUUCAUUCCCG	::.:::::::::::::::.	UUGGGAUGAAGCCUGGUCCGG	Cleavage	locus=Chr02:2486221:2491454:+	1
crt-miR166a	DACA015668	1	-1	1	22	553	574	UCGGACCAGGCUUCAUUCCCGU	: ::.:::::::::::::::.	CCUGGGAUGAAGCCUGGUCCGG	Cleavage	locus=Chr08:11066706:11074546:-	1
crt-miR166a	DACA015342	1	-1	1	22	568	589	UCGGACCAGGCUUCAUUCCCGU	: ::.:::::::::::::::.	CCCGGGAUGAAGCCUGGUCCGG	Cleavage	locus=Chr07:24317952:24325668:-	1
crt-miR166a	DACA002429	1	-1	1	22	568	589	UCGGACCAGGCUUCAUUCCCGU	: ::.:::::::::::::::.	CCCGGGAUGAAGCCUGGUCCGG	Cleavage	locus=Chr11:16707398:16716252:-	1
crt-miR166a	DACA002672	1	-1	1	22	553	574	UCGGACCAGGCUUCAUUCCCGU	: ::.:::::::::::::::.	CCUGGGAUGAAGCCUGGUCCGG	Cleavage	locus=Chr07:12662273:12669644:-	1
crt-miR166a	DACA022171	1	-1	1	22	538	559	UCGGACCAGGCUUCAUUCCCGU	::.:::::::::::::::.	CUUGGGAUGAAGCCUGGUCCGG	Cleavage	locus=Chr02:2486221:2491454:+	1
crt-miR166b	DACA015668	1	-1	1	22	553	574	UCGGACCAGGCUUCAUUCCCUU	::.:::::::::::::::.	CCUGGGAUGAAGCCUGGUCCGG	Cleavage	locus=Chr08:11066706:11074546:-	1
crt-miR166b	DACA015342	1	-1	1	22	568	589	UCGGACCAGGCUUCAUUCCCUU	::.:::::::::::::::.	CCCGGGAUGAAGCCUGGUCCGG	Cleavage	locus=Chr07:24317952:24325668:-	1
crt-miR166b	DACA002429	1	-1	1	22	568	589	UCGGACCAGGCUUCAUUCCCUU	::.:::::::::::::::.	CCCGGGAUGAAGCCUGGUCCGG	Cleavage	locus=Chr11:16707398:16716252:-	1
crt-miR166b	DACA022171	1	-1	1	22	538	559	UCGGACCAGGCUUCAUUCCCUU	::.:::::::::::::::.	CUUGGGAUGAAGCCUGGUCCGG	Cleavage	locus=Chr02:2486221:2491454:+	1
crt-miR166b	DACA002672	1	-1	1	22	553	574	UCGGACCAGGCUUCAUUCCCUU	::.:::::::::::::::.	CCUGGGAUGAAGCCUGGUCCGG	Cleavage	locus=Chr07:12662273:12669644:-	1
csi-miR166a	DACA002672	1	-1	1	22	553	574	UCGGACCAGGCUUCAUUCCCCC	::.:::::::::::::::.	CCUGGGAUGAAGCCUGGUCCGG	Cleavage	locus=Chr07:12662273:12669644:-	1
csi-miR166a	DACA022171	1	-1	1	22	538	559	UCGGACCAGGCUUCAUUCCCCC	::.:::::::::::::::.	CUUGGGAUGAAGCCUGGUCCGG	Cleavage	locus=Chr02:2486221:2491454:+	1
csi-miR166a	DACA015342	1	-1	1	22	568	589	UCGGACCAGGCUUCAUUCCCCC	::.:::::::::::::::.	CCCGGGAUGAAGCCUGGUCCGG	Cleavage	locus=Chr07:24317952:24325668:-	1
csi-miR166a	DACA002429	1	-1	1	22	568	589	UCGGACCAGGCUUCAUUCCCCC	::.:::::::::::::::.	CCCGGGAUGAAGCCUGGUCCGG	Cleavage	locus=Chr11:16707398:16716252:-	1
csi-miR166a	DACA015668	1	-1	1	22	553	574	UCGGACCAGGCUUCAUUCCCCC	::.:::::::::::::::.	CCUGGGAUGAAGCCUGGUCCGG	Cleavage	locus=Chr08:11066706:11074546:-	1
csi-miR166b	DACA015668	1	-1	1	22	553	574	UCGGACCAGGCUUCAUUCCCGU	: ::.:::::::::::::::.	CCUGGGAUGAAGCCUGGUCCGG	Cleavage	locus=Chr08:11066706:11074546:-	1
csi-miR166b	DACA015342	1	-1	1	22	568	589	UCGGACCAGGCUUCAUUCCCGU	: ::.:::::::::::::::.	CCCGGGAUGAAGCCUGGUCCGG	Cleavage	locus=Chr07:24317952:24325668:-	1
csi-miR166b	DACA002429	1	-1	1	22	568	589	UCGGACCAGGCUUCAUUCCCGU	: ::.:::::::::::::::.	CCCGGGAUGAAGCCUGGUCCGG	Cleavage	locus=Chr11:16707398:16716252:-	1
csi-miR166b	DACA002672	1	-1	1	22	553	574	UCGGACCAGGCUUCAUUCCCGU	: ::.:::::::::::::::.	CCUGGGAUGAAGCCUGGUCCGG	Cleavage	locus=Chr07:12662273:12669644:-	1
csi-miR166b	DACA022171	1	-1	1	22	538	559	UCGGACCAGGCUUCAUUCCCGU	::.:::::::::::::::.	CUUGGGAUGAAGCCUGGUCCGG	Cleavage	locus=Chr02:2486221:2491454:+	1
csi-miR166c	DACA015668	1	-1	1	20	555	574	UCGGACCAGGCUUCAUUCCC	::.:::::::::::::::.	UGGGAUGAAGCCUGGUCCGG	Cleavage	locus=Chr08:11066706:11074546:-	1
csi-miR166c	DACA015342	1	-1	1	20	570	589	UCGGACCAGGCUUCAUUCCC	::.:::::::::::::::.	CGGGAUGAAGCCUGGUCCGG	Cleavage	locus=Chr07:24317952:24325668:-	1
csi-miR166c	DACA002429	1	-1	1	20	570	589	UCGGACCAGGCUUCAUUCCC	::.:::::::::::::::.	CGGGAUGAAGCCUGGUCCGG	Cleavage	locus=Chr11:16707398:16716252:-	1
csi-miR166c	DACA022171	1	-1	1	20	540	559	UCGGACCAGGCUUCAUUCCC	::.:::::::::::::::.	UGGGAUGAAGCCUGGUCCGG	Cleavage	locus=Chr02:2486221:2491454:+	1
csi-miR166c	DACA002672	1	-1	1	20	555	574	UCGGACCAGGCUUCAUUCCC	::.:::::::::::::::.	UGGGAUGAAGCCUGGUCCGG	Cleavage	locus=Chr07:12662273:12669644:-	1
csi-miR166d	DACA015342	1	-1	1	21	569	589	UCGGACCAGGCUUCAUUCCCU	::.:::::::::::::::.	CCGGGAUGAAGCCUGGUCCGG	Cleavage	locus=Chr07:24317952:24325668:-	1
csi-miR166d	DACA002429	1	-1	1	21	569	589	UCGGACCAGGCUUCAUUCCCU	::.:::::::::::::::.	CCGGGAUGAAGCCUGGUCCGG	Cleavage	locus=Chr11:16707398:16716252:-	1
csi-miR166d	DACA022171	1	-1	1	21	539	559	UCGGACCAGGCUUCAUUCCCU	::.:::::::::::::::.	UUGGGAUGAAGCCUGGUCCGG	Cleavage	locus=Chr02:2486221:2491454:+	1
csi-miR166d	DACA015668	1	-1	1	21	554	574	UCGGACCAGGCUUCAUUCCCU	::.:::::::::::::::.	CUGGGAUGAAGCCUGGUCCGG	Cleavage	locus=Chr08:11066706:11074546:-	1
csi-miR166d	DACA002672	1	-1	1	21	554	574	UCGGACCAGGCUUCAUUCCCU	::.:::::::::::::::.	CUGGGAUGAAGCCUGGUCCGG	Cleavage	locus=Chr07:12662273:12669644:-	1
csi-miR166e-3p	DACA022171	1	-1	1	21	539	559	UCGGACCAGGCUUCAUUCCCC	::.:::::::::::::::.	UUGGGAUGAAGCCUGGUCCGG	Cleavage	locus=Chr02:2486221:2491454:+	1
csi-miR166e-3p	DACA015668	1	-1	1	21	554	574	UCGGACCAGGCUUCAUUCCCC	::.:::::::::::::::.	CUGGGAUGAAGCCUGGUCCGG	Cleavage	locus=Chr08:11066706:11074546:-	1
csi-miR166e-3p	DACA015342	1	-1	1	21	569	589	UCGGACCAGGCUUCAUUCCCC	::.:::::::::::::::.	CCGGGAUGAAGCCUGGUCCGG	Cleavage	locus=Chr07:24317952:24325668:-	1
csi-miR166e-3p	DACA002429	1	-1	1	21	569	589	UCGGACCAGGCUUCAUUCCCC	::.:::::::::::::::.	CCGGGAUGAAGCCUGGUCCGG	Cleavage	locus=Chr11:16707398:16716252:-	1
csi-miR166e-3p	DACA002672	1	-1	1	21	554	574	UCGGACCAGGCUUCAUUCCCC	::.:::::::::::::::.	CUGGGAUGAAGCCUGGUCCGG	Cleavage	locus=Chr07:12662273:12669644:-	1
ctr-miR166	DACA015342	1	-1	1	22	568	589	UCGGACCAGGCUUCAUUCCCCC	::.:::::::::::::::.	CCCGGGAUGAAGCCUGGUCCGG	Cleavage	locus=Chr07:24317952:24325668:-	1
ctr-miR166	DACA002429	1	-1	1	22	568	589	UCGGACCAGGCUUCAUUCCCCC	::.:::::::::::::::.	CCCGGGAUGAAGCCUGGUCCGG	Cleavage	locus=Chr11:16707398:16716252:-	1
ctr-miR166	DACA022171	1	-1	1	22	538	559	UCGGACCAGGCUUCAUUCCCCC	::.:::::::::::::::.	CUUGGGAUGAAGCCUGGUCCGG	Cleavage	locus=Chr02:2486221:2491454:+	1
ctr-miR166	DACA002672	1	-1	1	22	553	574	UCGGACCAGGCUUCAUUCCCCC	::.:::::::::::::::.	CCUGGGAUGAAGCCUGGUCCGG	Cleavage	locus=Chr07:12662273:12669644:-	1
ctr-miR166	DACA015668	1	-1	1	22	553	574	UCGGACCAGGCUUCAUUCCCCC	::.:::::::::::::::.	CCUGGGAUGAAGCCUGGUCCGG	Cleavage	locus=Chr08:11066706:11074546:-	1
dpr-miR166a	DACA015668	1	-1	1	21	554	574	UCGGACCAGGCUUCAUUCCUC	::.:::::::::::::::.	CUGGGAUGAAGCCUGGUCCGG	Cleavage	locus=Chr08:11066706:11074546:-	1
dpr-miR166a	DACA015342	1	-1	1	21	569	589	UCGGACCAGGCUUCAUUCCUC	::.:::::::::::::::.	CCGGGAUGAAGCCUGGUCCGG	Cleavage	locus=Chr07:24317952:24325668:-	1
dpr-miR166a	DACA002429	1	-1	1	21	569	589	UCGGACCAGGCUUCAUUCCUC	::.:::::::::::::::.	CCGGGAUGAAGCCUGGUCCGG	Cleavage	locus=Chr11:16707398:16716252:-	1
dpr-miR166a	DACA002672	1	-1	1	21	554	574	UCGGACCAGGCUUCAUUCCUC	::.:::::::::::::::.	CUGGGAUGAAGCCUGGUCCGG	Cleavage	locus=Chr07:12662273:12669644:-	1
dpr-miR166a	DACA022171	1	-1	1	21	539	559	UCGGACCAGGCUUCAUUCCUC	::.:::::::::::::::.	UUGGGAUGAAGCCUGGUCCGG	Cleavage	locus=Chr02:2486221:2491454:+	1
dpr-miR166b	DACA002672	1	-1	1	21	554	574	UCGGACCAGGCUUCAUUCCCC	::.:::::::::::::::.	CUGGGAUGAAGCCUGGUCCGG	Cleavage	locus=Chr07:12662273:12669644:-	1
dpr-miR166b	DACA022171	1	-1	1	21	539	559	UCGGACCAGGCUUCAUUCCCC	::.:::::::::::::::.	UUGGGAUGAAGCCUGGUCCGG	Cleavage	locus=Chr02:2486221:2491454:+	1
dpr-miR166b	DACA015668	1	-1	1	21	554	574	UCGGACCAGGCUUCAUUCCCC	::.:::::::::::::::.	CUGGGAUGAAGCCUGGUCCGG	Cleavage	locus=Chr08:11066706:11074546:-	1
dpr-miR166b	DACA015342	1	-1	1	21	569	589	UCGGACCAGGCUUCAUUCCCC	::.:::::::::::::::.	CCGGGAUGAAGCCUGGUCCGG	Cleavage	locus=Chr07:24317952:24325668:-	1
dpr-miR166b	DACA002429	1	-1	1	21	569	589	UCGGACCAGGCUUCAUUCCCC	::.:::::::::::::::.	CCGGGAUGAAGCCUGGUCCGG	Cleavage	locus=Chr11:16707398:16716252:-	1
ghr-miR166b	DACA002429	1	-1	1	21	569	589	UCGGACCAGGCUUCAUUCCCC	::.:::::::::::::::.	CCGGGAUGAAGCCUGGUCCGG	Cleavage	locus=Chr11:16707398:16716252:-	1
ghr-miR166b	DACA015668	1	-1	1	21	554	574	UCGGACCAGGCUUCAUUCCCC	::.:::::::::::::::.	CUGGGAUGAAGCCUGGUCCGG	Cleavage	locus=Chr08:11066706:11074546:-	1
ghr-miR166b	DACA002672	1	-1	1	21	554	574	UCGGACCAGGCUUCAUUCCCC	::.:::::::::::::::.	CUGGGAUGAAGCCUGGUCCGG	Cleavage	locus=Chr07:12662273:12669644:-	1
ghr-miR166b	DACA015342	1	-1	1	21	569	589	UCGGACCAGGCUUCAUUCCCC	::.:::::::::::::::.	CCGGGAUGAAGCCUGGUCCGG	Cleavage	locus=Chr07:24317952:24325668:-	1
ghr-miR166b	DACA022171	1	-1	1	21	539	559	UCGGACCAGGCUUCAUUCCCC	::.:::::::::::::::.	UUGGGAUGAAGCCUGGUCCGG	Cleavage	locus=Chr02:2486221:2491454:+	1
gma-miR166a-3p	DACA002429	1	-1	1	21	569	589	UCGGACCAGGCUUCAUUCCCC	::.:::::::::::::::.	CCGGGAUGAAGCCUGGUCCGG	Cleavage	locus=Chr11:16707398:16716252:-	1
gma-miR166a-3p	DACA015668	1	-1	1	21	554	574	UCGGACCAGGCUUCAUUCCCC	::.:::::::::::::::.	CUGGGAUGAAGCCUGGUCCGG	Cleavage	locus=Chr08:11066706:11074546:-	1
gma-miR166a-3p	DACA002672	1	-1	1	21	554	574	UCGGACCAGGCUUCAUUCCCC	::.:::::::::::::::.	CUGGGAUGAAGCCUGGUCCGG	Cleavage	locus=Chr07:12662273:12669644:-	1
gma-miR166a-3p	DACA022171	1	-1	1	21	539	559	UCGGACCAGGCUUCAUUCCCC	::.:::::::::::::::.	UUGGGAUGAAGCCUGGUCCGG	Cleavage	locus=Chr02:2486221:2491454:+	1
gma-miR166a-3p	DACA015342	1	-1	1	21	569	589	UCGGACCAGGCUUCAUUCCCC	::.:::::::::::::::.	CCGGGAUGAAGCCUGGUCCGG	Cleavage	locus=Chr07:24317952:24325668:-	1
gma-miR166b	DACA022171	1	-1	1	21	539	559	UCGGACCAGGCUUCAUUCCCC	::.:::::::::::::::.	UUGGGAUGAAGCCUGGUCCGG	Cleavage	locus=Chr02:2486221:2491454:+	1
gma-miR166b	DACA015668	1	-1	1	21	554	574	UCGGACCAGGCUUCAUUCCCC	::.:::::::::::::::.	CUGGGAUGAAGCCUGGUCCGG	Cleavage	locus=Chr08:11066706:11074546:-	1
gma-miR166b	DACA002429	1	-1	1	21	569	589	UCGGACCAGGCUUCAUUCCCC	::.:::::::::::::::.	CCGGGAUGAAGCCUGGUCCGG	Cleavage	locus=Chr11:16707398:16716252:-	1
gma-miR166b	DACA002672	1	-1	1	21	554	574	UCGGACCAGGCUUCAUUCCCC	::.:::::::::::::::.	CUGGGAUGAAGCCUGGUCCGG	Cleavage	locus=Chr07:12662273:12669644:-	1
gma-miR166b	DACA015342	1	-1	1	21	569	589	UCGGACCAGGCUUCAUUCCCC	::.:::::::::::::::.	CCGGGAUGAAGCCUGGUCCGG	Cleavage	locus=Chr07:24317952:24325668:-	1
gma-miR166c-3p	DACA002672	1	-1	1	21	554	574	UCGGACCAGGCUUCAUUCCCC	::.:::::::::::::::.	CUGGGAUGAAGCCUGGUCCGG	Cleavage	locus=Chr07:12662273:12669644:-	1
gma-miR166c-3p	DACA015668	1	-1	1	21	554	574	UCGGACCAGGCUUCAUUCCCC	::.:::::::::::::::.	CUGGGAUGAAGCCUGGUCCGG	Cleavage	locus=Chr08:11066706:11074546:-	1
gma-miR166c-3p	DACA015342	1	-1	1	21	569	589	UCGGACCAGGCUUCAUUCCCC	::.:::::::::::::::.	CCGGGAUGAAGCCUGGUCCGG	Cleavage	locus=Chr07:24317952:24325668:-	1
gma-miR166c-3p	DACA002429	1	-1	1	21	569	589	UCGGACCAGGCUUCAUUCCCC	::.:::::::::::::::.	CCGGGAUGAAGCCUGGUCCGG	Cleavage	locus=Chr11:16707398:16716252:-	1
gma-miR166c-3p	DACA022171	1	-1	1	21	539	559	UCGGACCAGGCUUCAUUCCCC	::.:::::::::::::::.	UUGGGAUGAAGCCUGGUCCGG	Cleavage	locus=Chr02:2486221:2491454:+	1
gma-miR166d	DACA015342	1	-1	1	21	569	589	UCGGACCAGGCUUCAUUCCCC	::.:::::::::::::::.	CCGGGAUGAAGCCUGGUCCGG	Cleavage	locus=Chr07:24317952:24325668:-	1
gma-miR166d	DACA002429	1	-1	1	21	569	589	UCGGACCAGGCUUCAUUCCCC	::.:::::::::::::::.	CCGGGAUGAAGCCUGGUCCGG	Cleavage	locus=Chr11:16707398:16716252:-	1
gma-miR166d	DACA022171	1	-1	1	21	539	559	UCGGACCAGGCUUCAUUCCCC	::.:::::::::::::::.	UUGGGAUGAAGCCUGGUCCGG	Cleavage	locus=Chr02:2486221:2491454:+	1
gma-miR166d	DACA002672	1	-1	1	21	554	574	UCGGACCAGGCUUCAUUCCCC	::.:::::::::::::::.	CUGGGAUGAAGCCUGGUCCGG	Cleavage	locus=Chr07:12662273:12669644:-	1
gma-miR166d	DACA015668	1	-1	1	21	554	574	UCGGACCAGGCUUCAUUCCCC	::.:::::::::::::::.	CUGGGAUGAAGCCUGGUCCGG	Cleavage	locus=Chr08:11066706:11074546:-	1
gma-miR166e	DACA015342	1	-1	1	21	569	589	UCGGACCAGGCUUCAUUCCCC	::.:::::::::::::::.	CCGGGAUGAAGCCUGGUCCGG	Cleavage	locus=Chr07:24317952:24325668:-	1
gma-miR166e	DACA002429	1	-1	1	21	569	589	UCGGACCAGGCUUCAUUCCCC	::.:::::::::::::::.	CCGGGAUGAAGCCUGGUCCGG	Cleavage	locus=Chr11:16707398:16716252:-	1
gma-miR166e	DACA022171	1	-1	1	21	539	559	UCGGACCAGGCUUCAUUCCCC	::.:::::::::::::::.	UUGGGAUGAAGCCUGGUCCGG	Cleavage	locus=Chr02:2486221:2491454:+	1
gma-miR166e	DACA002672	1	-1	1	21	554	574	UCGGACCAGGCUUCAUUCCCC	::.:::::::::::::::.	CUGGGAUGAAGCCUGGUCCGG	Cleavage	locus=Chr07:12662273:12669644:-	1
gma-miR166e	DACA015668	1	-1	1	21	554	574	UCGGACCAGGCUUCAUUCCCC	::.:::::::::::::::.	CUGGGAUGAAGCCUGGUCCGG	Cleavage	locus=Chr08:11066706:11074546:-	1
gma-miR166f	DACA015342	1	-1	1	21	569	589	UCGGACCAGGCUUCAUUCCCC	::.:::::::::::::::.	CCGGGAUGAAGCCUGGUCCGG	Cleavage	locus=Chr07:24317952:24325668:-	1
gma-miR166f	DACA002429	1	-1	1	21	569	589	UCGGACCAGGCUUCAUUCCCC	::.:::::::::::::::.	CCGGGAUGAAGCCUGGUCCGG	Cleavage	locus=Chr11:16707398:16716252:-	1
gma-miR166f	DACA022171	1	-1	1	21	539	559	UCGGACCAGGCUUCAUUCCCC	::.:::::::::::::::.	UUGGGAUGAAGCCUGGUCCGG	Cleavage	locus=Chr02:2486221:2491454:+	1
gma-miR166f	DACA002672	1	-1	1	21	554	574	UCGGACCAGGCUUCAUUCCCC	::.:::::::::::::::.	CUGGGAUGAAGCCUGGUCCGG	Cleavage	locus=Chr07:12662273:12669644:-	1
gma-miR166f	DACA015668	1	-1	1	21	554	574	UCGGACCAGGCUUCAUUCCCC	::.:::::::::::::::.	CUGGGAUGAAGCCUGGUCCGG	Cleavage	locus=Chr08:11066706:11074546:-	1
gma-miR166g	DACA015668	1	-1	1	21	554	574	UCGGACCAGGCUUCAUUCCCC	::.:::::::::::::::.	CUGGGAUGAAGCCUGGUCCGG	Cleavage	locus=Chr08:11066706:11074546:-	1
gma-miR166g	DACA015342	1	-1	1	21	569	589	UCGGACCAGGCUUCAUUCCCC	::.:::::::::::::::.	CCGGGAUGAAGCCUGGUCCGG	Cleavage	locus=Chr07:24317952:24325668:-	1
gma-miR166g	DACA002429	1	-1	1	21	569	589	UCGGACCAGGCUUCAUUCCCC	::.:::::::::::::::.	CCGGGAUGAAGCCUGGUCCGG	Cleavage	locus=Chr11:16707398:16716252:-	1
gma-miR166g	DACA002672	1	-1	1	21	554	574	UCGGACCAGGCUUCAUUCCCC	::.:::::::::::::::.	CUGGGAUGAAGCCUGGUCCGG	Cleavage	locus=Chr07:12662273:12669644:-	1
gma-miR166g	DACA022171	1	-1	1	21	539	559	UCGGACCAGGCUUCAUUCCCC	::.:::::::::::::::.	UUGGGAUGAAGCCUGGUCCGG	Cleavage	locus=Chr02:2486221:2491454:+	1
gma-miR166i-3p	DACA015668	1	-1	1	21	554	574	UCGGACCAGGCUUCAUUCCCC	::.:::::::::::::::.	CUGGGAUGAAGCCUGGUCCGG	Cleavage	locus=Chr08:11066706:11074546:-	1
gma-miR166i-3p	DACA015342	1	-1	1	21	569	589	UCGGACCAGGCUUCAUUCCCC	::.:::::::::::::::.	CCGGGAUGAAGCCUGGUCCGG	Cleavage	locus=Chr07:24317952:24325668:-	1
gma-miR166i-3p	DACA002429	1	-1	1	21	569	589	UCGGACCAGGCUUCAUUCCCC	::.:::::::::::::::.	CCGGGAUGAAGCCUGGUCCGG	Cleavage	locus=Chr11:16707398:16716252:-	1
gma-miR166i-3p	DACA002672	1	-1	1	21	554	574	UCGGACCAGGCUUCAUUCCCC	::.:::::::::::::::.	CUGGGAUGAAGCCUGGUCCGG	Cleavage	locus=Chr07:12662273:12669644:-	1
gma-miR166i-3p	DACA022171	1	-1	1	21	539	559	UCGGACCAGGCUUCAUUCCCC	::.:::::::::::::::.	UUGGGAUGAAGCCUGGUCCGG	Cleavage	locus=Chr02:2486221:2491454:+	1
gma-miR166j-3p	DACA002429	1	-1	1	21	569	589	UCGGACCAGGCUUCAUUCCCG	: ::.:::::::::::::::.	CCGGGAUGAAGCCUGGUCCGG	Cleavage	locus=Chr11:16707398:16716252:-	1
gma-miR166j-3p	DACA002672	1	-1	1	21	554	574	UCGGACCAGGCUUCAUUCCCG	: ::.:::::::::::::::.	CUGGGAUGAAGCCUGGUCCGG	Cleavage	locus=Chr07:12662273:12669644:-	1
gma-miR166j-3p	DACA015668	1	-1	1	21	554	574	UCGGACCAGGCUUCAUUCCCG	: ::.:::::::::::::::.	CUGGGAUGAAGCCUGGUCCGG	Cleavage	locus=Chr08:11066706:11074546:-	1
gma-miR166j-3p	DACA015342	1	-1	1	21	569	589	UCGGACCAGGCUUCAUUCCCG	: ::.:::::::::::::::.	CCGGGAUGAAGCCUGGUCCGG	Cleavage	locus=Chr07:24317952:24325668:-	1
gma-miR166j-3p	DACA022171	1	-1	1	21	539	559	UCGGACCAGGCUUCAUUCCCG	::.:::::::::::::::.	UUGGGAUGAAGCCUGGUCCGG	Cleavage	locus=Chr02:2486221:2491454:+	1
gma-miR166n	DACA002429	1	-1	1	21	569	589	UCGGACCAGGCUUCAUUCCCC	::.:::::::::::::::.	CCGGGAUGAAGCCUGGUCCGG	Cleavage	locus=Chr11:16707398:16716252:-	1
gma-miR166n	DACA022171	1	-1	1	21	539	559	UCGGACCAGGCUUCAUUCCCC	::.:::::::::::::::.	UUGGGAUGAAGCCUGGUCCGG	Cleavage	locus=Chr02:2486221:2491454:+	1
gma-miR166n	DACA015668	1	-1	1	21	554	574	UCGGACCAGGCUUCAUUCCCC	::.:::::::::::::::.	CUGGGAUGAAGCCUGGUCCGG	Cleavage	locus=Chr08:11066706:11074546:-	1
gma-miR166n	DACA015342	1	-1	1	21	569	589	UCGGACCAGGCUUCAUUCCCC	::.:::::::::::::::.	CCGGGAUGAAGCCUGGUCCGG	Cleavage	locus=Chr07:24317952:24325668:-	1
gma-miR166n	DACA002672	1	-1	1	21	554	574	UCGGACCAGGCUUCAUUCCCC	::.:::::::::::::::.	CUGGGAUGAAGCCUGGUCCGG	Cleavage	locus=Chr07:12662273:12669644:-	1
gma-miR166o	DACA015668	1	-1	1	21	554	574	UCGGACCAGGCUUCAUUCCCC	::.:::::::::::::::.	CUGGGAUGAAGCCUGGUCCGG	Cleavage	locus=Chr08:11066706:11074546:-	1
gma-miR166o	DACA015342	1	-1	1	21	569	589	UCGGACCAGGCUUCAUUCCCC	::.:::::::::::::::.	CCGGGAUGAAGCCUGGUCCGG	Cleavage	locus=Chr07:24317952:24325668:-	1
gma-miR166o	DACA002429	1	-1	1	21	569	589	UCGGACCAGGCUUCAUUCCCC	::.:::::::::::::::.	CCGGGAUGAAGCCUGGUCCGG	Cleavage	locus=Chr11:16707398:16716252:-	1
gma-miR166o	DACA002672	1	-1	1	21	554	574	UCGGACCAGGCUUCAUUCCCC	::.:::::::::::::::.	CUGGGAUGAAGCCUGGUCCGG	Cleavage	locus=Chr07:12662273:12669644:-	1
gma-miR166o	DACA022171	1	-1	1	21	539	559	UCGGACCAGGCUUCAUUCCCC	::.:::::::::::::::.	UUGGGAUGAAGCCUGGUCCGG	Cleavage	locus=Chr02:2486221:2491454:+	1
gma-miR166p	DACA015668	1	-1	1	20	555	574	UCGGACCAGGCUUCAUUCCC	::.:::::::::::::::.	UGGGAUGAAGCCUGGUCCGG	Cleavage	locus=Chr08:11066706:11074546:-	1
gma-miR166p	DACA015342	1	-1	1	20	570	589	UCGGACCAGGCUUCAUUCCC	::.:::::::::::::::.	CGGGAUGAAGCCUGGUCCGG	Cleavage	locus=Chr07:24317952:24325668:-	1
gma-miR166p	DACA002429	1	-1	1	20	570	589	UCGGACCAGGCUUCAUUCCC	::.:::::::::::::::.	CGGGAUGAAGCCUGGUCCGG	Cleavage	locus=Chr11:16707398:16716252:-	1
gma-miR166p	DACA022171	1	-1	1	20	540	559	UCGGACCAGGCUUCAUUCCC	::.:::::::::::::::.	UGGGAUGAAGCCUGGUCCGG	Cleavage	locus=Chr02:2486221:2491454:+	1
gma-miR166p	DACA002672	1	-1	1	20	555	574	UCGGACCAGGCUUCAUUCCC	::.:::::::::::::::.	UGGGAUGAAGCCUGGUCCGG	Cleavage	locus=Chr07:12662273:12669644:-	1
gma-miR166q	DACA002672	1	-1	1	20	555	574	UCGGACCAGGCUUCAUUCCC	::.:::::::::::::::.	UGGGAUGAAGCCUGGUCCGG	Cleavage	locus=Chr07:12662273:12669644:-	1
gma-miR166q	DACA015668	1	-1	1	20	555	574	UCGGACCAGGCUUCAUUCCC	::.:::::::::::::::.	UGGGAUGAAGCCUGGUCCGG	Cleavage	locus=Chr08:11066706:11074546:-	1
gma-miR166q	DACA015342	1	-1	1	20	570	589	UCGGACCAGGCUUCAUUCCC	::.:::::::::::::::.	CGGGAUGAAGCCUGGUCCGG	Cleavage	locus=Chr07:24317952:24325668:-	1
gma-miR166q	DACA002429	1	-1	1	20	570	589	UCGGACCAGGCUUCAUUCCC	::.:::::::::::::::.	CGGGAUGAAGCCUGGUCCGG	Cleavage	locus=Chr11:16707398:16716252:-	1
gma-miR166q	DACA022171	1	-1	1	20	540	559	UCGGACCAGGCUUCAUUCCC	::.:::::::::::::::.	UGGGAUGAAGCCUGGUCCGG	Cleavage	locus=Chr02:2486221:2491454:+	1
gma-miR166r	DACA002672	1	-1	1	20	555	574	UCGGACCAGGCUUCAUUCCC	::.:::::::::::::::.	UGGGAUGAAGCCUGGUCCGG	Cleavage	locus=Chr07:12662273:12669644:-	1
gma-miR166r	DACA022171	1	-1	1	20	540	559	UCGGACCAGGCUUCAUUCCC	::.:::::::::::::::.	UGGGAUGAAGCCUGGUCCGG	Cleavage	locus=Chr02:2486221:2491454:+	1
gma-miR166r	DACA015342	1	-1	1	20	570	589	UCGGACCAGGCUUCAUUCCC	::.:::::::::::::::.	CGGGAUGAAGCCUGGUCCGG	Cleavage	locus=Chr07:24317952:24325668:-	1
gma-miR166r	DACA002429	1	-1	1	20	570	589	UCGGACCAGGCUUCAUUCCC	::.:::::::::::::::.	CGGGAUGAAGCCUGGUCCGG	Cleavage	locus=Chr11:16707398:16716252:-	1
gma-miR166r	DACA015668	1	-1	1	20	555	574	UCGGACCAGGCUUCAUUCCC	::.:::::::::::::::.	UGGGAUGAAGCCUGGUCCGG	Cleavage	locus=Chr08:11066706:11074546:-	1
gma-miR166s	DACA002672	1	-1	1	20	555	574	UCGGACCAGGCUUCAUUCCC	::.:::::::::::::::.	UGGGAUGAAGCCUGGUCCGG	Cleavage	locus=Chr07:12662273:12669644:-	1
gma-miR166s	DACA015668	1	-1	1	20	555	574	UCGGACCAGGCUUCAUUCCC	::.:::::::::::::::.	UGGGAUGAAGCCUGGUCCGG	Cleavage	locus=Chr08:11066706:11074546:-	1
gma-miR166s	DACA022171	1	-1	1	20	540	559	UCGGACCAGGCUUCAUUCCC	::.:::::::::::::::.	UGGGAUGAAGCCUGGUCCGG	Cleavage	locus=Chr02:2486221:2491454:+	1
gma-miR166s	DACA015342	1	-1	1	20	570	589	UCGGACCAGGCUUCAUUCCC	::.:::::::::::::::.	CGGGAUGAAGCCUGGUCCGG	Cleavage	locus=Chr07:24317952:24325668:-	1
gma-miR166s	DACA002429	1	-1	1	20	570	589	UCGGACCAGGCUUCAUUCCC	::.:::::::::::::::.	CGGGAUGAAGCCUGGUCCGG	Cleavage	locus=Chr11:16707398:16716252:-	1
gma-miR166t	DACA015342	1	-1	1	20	570	589	UCGGACCAGGCUUCAUUCCC	::.:::::::::::::::.	CGGGAUGAAGCCUGGUCCGG	Cleavage	locus=Chr07:24317952:24325668:-	1
gma-miR166t	DACA002429	1	-1	1	20	570	589	UCGGACCAGGCUUCAUUCCC	::.:::::::::::::::.	CGGGAUGAAGCCUGGUCCGG	Cleavage	locus=Chr11:16707398:16716252:-	1
gma-miR166t	DACA002672	1	-1	1	20	555	574	UCGGACCAGGCUUCAUUCCC	::.:::::::::::::::.	UGGGAUGAAGCCUGGUCCGG	Cleavage	locus=Chr07:12662273:12669644:-	1
gma-miR166t	DACA022171	1	-1	1	20	540	559	UCGGACCAGGCUUCAUUCCC	::.:::::::::::::::.	UGGGAUGAAGCCUGGUCCGG	Cleavage	locus=Chr02:2486221:2491454:+	1
gma-miR166t	DACA015668	1	-1	1	20	555	574	UCGGACCAGGCUUCAUUCCC	::.:::::::::::::::.	UGGGAUGAAGCCUGGUCCGG	Cleavage	locus=Chr08:11066706:11074546:-	1
hbr-miR166a	DACA015342	1	-1	1	19	571	589	UCGGACCAGGCUUCAUUCC	::.:::::::::::::::.	GGGAUGAAGCCUGGUCCGG	Cleavage	locus=Chr07:24317952:24325668:-	1
hbr-miR166a	DACA022171	1	-1	1	19	541	559	UCGGACCAGGCUUCAUUCC	::.:::::::::::::::.	GGGAUGAAGCCUGGUCCGG	Cleavage	locus=Chr02:2486221:2491454:+	1
hbr-miR166a	DACA015668	1	-1	1	19	556	574	UCGGACCAGGCUUCAUUCC	::.:::::::::::::::.	GGGAUGAAGCCUGGUCCGG	Cleavage	locus=Chr08:11066706:11074546:-	1
hbr-miR166a	DACA002429	1	-1	1	19	571	589	UCGGACCAGGCUUCAUUCC	::.:::::::::::::::.	GGGAUGAAGCCUGGUCCGG	Cleavage	locus=Chr11:16707398:16716252:-	1
hbr-miR166a	DACA002672	1	-1	1	19	556	574	UCGGACCAGGCUUCAUUCC	::.:::::::::::::::.	GGGAUGAAGCCUGGUCCGG	Cleavage	locus=Chr07:12662273:12669644:-	1
hbr-miR166b	DACA002672	1	-1	1	22	553	574	UCGGACCAGGCUUCAUUCCCCC	::.:::::::::::::::.	CCUGGGAUGAAGCCUGGUCCGG	Cleavage	locus=Chr07:12662273:12669644:-	1
hbr-miR166b	DACA022171	1	-1	1	22	538	559	UCGGACCAGGCUUCAUUCCCCC	::.:::::::::::::::.	CUUGGGAUGAAGCCUGGUCCGG	Cleavage	locus=Chr02:2486221:2491454:+	1
hbr-miR166b	DACA015342	1	-1	1	22	568	589	UCGGACCAGGCUUCAUUCCCCC	::.:::::::::::::::.	CCCGGGAUGAAGCCUGGUCCGG	Cleavage	locus=Chr07:24317952:24325668:-	1
hbr-miR166b	DACA002429	1	-1	1	22	568	589	UCGGACCAGGCUUCAUUCCCCC	::.:::::::::::::::.	CCCGGGAUGAAGCCUGGUCCGG	Cleavage	locus=Chr11:16707398:16716252:-	1
hbr-miR166b	DACA015668	1	-1	1	22	553	574	UCGGACCAGGCUUCAUUCCCCC	::.:::::::::::::::.	CCUGGGAUGAAGCCUGGUCCGG	Cleavage	locus=Chr08:11066706:11074546:-	1
hpa-miR166a	DACA015668	1	-1	1	21	554	574	UCGGACCAGGCUUCAUUCCCC	::.:::::::::::::::.	CUGGGAUGAAGCCUGGUCCGG	Cleavage	locus=Chr08:11066706:11074546:-	1
hpa-miR166a	DACA002429	1	-1	1	21	569	589	UCGGACCAGGCUUCAUUCCCC	::.:::::::::::::::.	CCGGGAUGAAGCCUGGUCCGG	Cleavage	locus=Chr11:16707398:16716252:-	1
hpa-miR166a	DACA022171	1	-1	1	21	539	559	UCGGACCAGGCUUCAUUCCCC	::.:::::::::::::::.	UUGGGAUGAAGCCUGGUCCGG	Cleavage	locus=Chr02:2486221:2491454:+	1
hpa-miR166a	DACA015342	1	-1	1	21	569	589	UCGGACCAGGCUUCAUUCCCC	::.:::::::::::::::.	CCGGGAUGAAGCCUGGUCCGG	Cleavage	locus=Chr07:24317952:24325668:-	1
hpa-miR166a	DACA002672	1	-1	1	21	554	574	UCGGACCAGGCUUCAUUCCCC	::.:::::::::::::::.	CUGGGAUGAAGCCUGGUCCGG	Cleavage	locus=Chr07:12662273:12669644:-	1
hpe-miR166a	DACA015342	1	-1	1	21	569	589	UCGGACCAGGCUUCAUUCCCC	::.:::::::::::::::.	CCGGGAUGAAGCCUGGUCCGG	Cleavage	locus=Chr07:24317952:24325668:-	1
hpe-miR166a	DACA002429	1	-1	1	21	569	589	UCGGACCAGGCUUCAUUCCCC	::.:::::::::::::::.	CCGGGAUGAAGCCUGGUCCGG	Cleavage	locus=Chr11:16707398:16716252:-	1
hpe-miR166a	DACA002672	1	-1	1	21	554	574	UCGGACCAGGCUUCAUUCCCC	::.:::::::::::::::.	CUGGGAUGAAGCCUGGUCCGG	Cleavage	locus=Chr07:12662273:12669644:-	1
hpe-miR166a	DACA022171	1	-1	1	21	539	559	UCGGACCAGGCUUCAUUCCCC	::.:::::::::::::::.	UUGGGAUGAAGCCUGGUCCGG	Cleavage	locus=Chr02:2486221:2491454:+	1
hpe-miR166a	DACA015668	1	-1	1	21	554	574	UCGGACCAGGCUUCAUUCCCC	::.:::::::::::::::.	CUGGGAUGAAGCCUGGUCCGG	Cleavage	locus=Chr08:11066706:11074546:-	1
hvu-miR166a	DACA015668	1	-1	1	21	554	574	UCGGACCAGGCUUCAUUCCCC	::.:::::::::::::::.	CUGGGAUGAAGCCUGGUCCGG	Cleavage	locus=Chr08:11066706:11074546:-	1
hvu-miR166a	DACA002672	1	-1	1	21	554	574	UCGGACCAGGCUUCAUUCCCC	::.:::::::::::::::.	CUGGGAUGAAGCCUGGUCCGG	Cleavage	locus=Chr07:12662273:12669644:-	1
hvu-miR166a	DACA022171	1	-1	1	21	539	559	UCGGACCAGGCUUCAUUCCCC	::.:::::::::::::::.	UUGGGAUGAAGCCUGGUCCGG	Cleavage	locus=Chr02:2486221:2491454:+	1
hvu-miR166a	DACA015342	1	-1	1	21	569	589	UCGGACCAGGCUUCAUUCCCC	::.:::::::::::::::.	CCGGGAUGAAGCCUGGUCCGG	Cleavage	locus=Chr07:24317952:24325668:-	1
hvu-miR166a	DACA002429	1	-1	1	21	569	589	UCGGACCAGGCUUCAUUCCCC	::.:::::::::::::::.	CCGGGAUGAAGCCUGGUCCGG	Cleavage	locus=Chr11:16707398:16716252:-	1
hvu-miR166b	DACA015668	1	-1	1	21	554	574	UCGGACCAGGCUUCAUUCCCC	::.:::::::::::::::.	CUGGGAUGAAGCCUGGUCCGG	Cleavage	locus=Chr08:11066706:11074546:-	1
hvu-miR166b	DACA015342	1	-1	1	21	569	589	UCGGACCAGGCUUCAUUCCCC	::.:::::::::::::::.	CCGGGAUGAAGCCUGGUCCGG	Cleavage	locus=Chr07:24317952:24325668:-	1
hvu-miR166b	DACA002429	1	-1	1	21	569	589	UCGGACCAGGCUUCAUUCCCC	::.:::::::::::::::.	CCGGGAUGAAGCCUGGUCCGG	Cleavage	locus=Chr11:16707398:16716252:-	1
hvu-miR166b	DACA022171	1	-1	1	21	539	559	UCGGACCAGGCUUCAUUCCCC	::.:::::::::::::::.	UUGGGAUGAAGCCUGGUCCGG	Cleavage	locus=Chr02:2486221:2491454:+	1
hvu-miR166b	DACA002672	1	-1	1	21	554	574	UCGGACCAGGCUUCAUUCCCC	::.:::::::::::::::.	CUGGGAUGAAGCCUGGUCCGG	Cleavage	locus=Chr07:12662273:12669644:-	1
hvu-miR166c	DACA015342	1	-1	1	21	569	589	UCGGACCAGGCUUCAUUCCCC	::.:::::::::::::::.	CCGGGAUGAAGCCUGGUCCGG	Cleavage	locus=Chr07:24317952:24325668:-	1
hvu-miR166c	DACA002429	1	-1	1	21	569	589	UCGGACCAGGCUUCAUUCCCC	::.:::::::::::::::.	CCGGGAUGAAGCCUGGUCCGG	Cleavage	locus=Chr11:16707398:16716252:-	1
hvu-miR166c	DACA022171	1	-1	1	21	539	559	UCGGACCAGGCUUCAUUCCCC	::.:::::::::::::::.	UUGGGAUGAAGCCUGGUCCGG	Cleavage	locus=Chr02:2486221:2491454:+	1
hvu-miR166c	DACA002672	1	-1	1	21	554	574	UCGGACCAGGCUUCAUUCCCC	::.:::::::::::::::.	CUGGGAUGAAGCCUGGUCCGG	Cleavage	locus=Chr07:12662273:12669644:-	1
hvu-miR166c	DACA015668	1	-1	1	21	554	574	UCGGACCAGGCUUCAUUCCCC	::.:::::::::::::::.	CUGGGAUGAAGCCUGGUCCGG	Cleavage	locus=Chr08:11066706:11074546:-	1
mdm-miR166a	DACA022171	1	-1	1	21	539	559	UCGGACCAGGCUUCAUUCCCC	::.:::::::::::::::.	UUGGGAUGAAGCCUGGUCCGG	Cleavage	locus=Chr02:2486221:2491454:+	1
mdm-miR166a	DACA015342	1	-1	1	21	569	589	UCGGACCAGGCUUCAUUCCCC	::.:::::::::::::::.	CCGGGAUGAAGCCUGGUCCGG	Cleavage	locus=Chr07:24317952:24325668:-	1
mdm-miR166a	DACA002429	1	-1	1	21	569	589	UCGGACCAGGCUUCAUUCCCC	::.:::::::::::::::.	CCGGGAUGAAGCCUGGUCCGG	Cleavage	locus=Chr11:16707398:16716252:-	1
mdm-miR166a	DACA015668	1	-1	1	21	554	574	UCGGACCAGGCUUCAUUCCCC	::.:::::::::::::::.	CUGGGAUGAAGCCUGGUCCGG	Cleavage	locus=Chr08:11066706:11074546:-	1
mdm-miR166a	DACA002672	1	-1	1	21	554	574	UCGGACCAGGCUUCAUUCCCC	::.:::::::::::::::.	CUGGGAUGAAGCCUGGUCCGG	Cleavage	locus=Chr07:12662273:12669644:-	1
mdm-miR166b	DACA015668	1	-1	1	21	554	574	UCGGACCAGGCUUCAUUCCCC	::.:::::::::::::::.	CUGGGAUGAAGCCUGGUCCGG	Cleavage	locus=Chr08:11066706:11074546:-	1
mdm-miR166b	DACA002672	1	-1	1	21	554	574	UCGGACCAGGCUUCAUUCCCC	::.:::::::::::::::.	CUGGGAUGAAGCCUGGUCCGG	Cleavage	locus=Chr07:12662273:12669644:-	1
mdm-miR166b	DACA022171	1	-1	1	21	539	559	UCGGACCAGGCUUCAUUCCCC	::.:::::::::::::::.	UUGGGAUGAAGCCUGGUCCGG	Cleavage	locus=Chr02:2486221:2491454:+	1
mdm-miR166b	DACA002429	1	-1	1	21	569	589	UCGGACCAGGCUUCAUUCCCC	::.:::::::::::::::.	CCGGGAUGAAGCCUGGUCCGG	Cleavage	locus=Chr11:16707398:16716252:-	1
mdm-miR166b	DACA015342	1	-1	1	21	569	589	UCGGACCAGGCUUCAUUCCCC	::.:::::::::::::::.	CCGGGAUGAAGCCUGGUCCGG	Cleavage	locus=Chr07:24317952:24325668:-	1
mdm-miR166c	DACA015668	1	-1	1	21	554	574	UCGGACCAGGCUUCAUUCCCC	::.:::::::::::::::.	CUGGGAUGAAGCCUGGUCCGG	Cleavage	locus=Chr08:11066706:11074546:-	1
mdm-miR166c	DACA015342	1	-1	1	21	569	589	UCGGACCAGGCUUCAUUCCCC	::.:::::::::::::::.	CCGGGAUGAAGCCUGGUCCGG	Cleavage	locus=Chr07:24317952:24325668:-	1
mdm-miR166c	DACA002429	1	-1	1	21	569	589	UCGGACCAGGCUUCAUUCCCC	::.:::::::::::::::.	CCGGGAUGAAGCCUGGUCCGG	Cleavage	locus=Chr11:16707398:16716252:-	1
mdm-miR166c	DACA022171	1	-1	1	21	539	559	UCGGACCAGGCUUCAUUCCCC	::.:::::::::::::::.	UUGGGAUGAAGCCUGGUCCGG	Cleavage	locus=Chr02:2486221:2491454:+	1
mdm-miR166c	DACA002672	1	-1	1	21	554	574	UCGGACCAGGCUUCAUUCCCC	::.:::::::::::::::.	CUGGGAUGAAGCCUGGUCCGG	Cleavage	locus=Chr07:12662273:12669644:-	1
mdm-miR166d	DACA015668	1	-1	1	21	554	574	UCGGACCAGGCUUCAUUCCCC	::.:::::::::::::::.	CUGGGAUGAAGCCUGGUCCGG	Cleavage	locus=Chr08:11066706:11074546:-	1
mdm-miR166d	DACA015342	1	-1	1	21	569	589	UCGGACCAGGCUUCAUUCCCC	::.:::::::::::::::.	CCGGGAUGAAGCCUGGUCCGG	Cleavage	locus=Chr07:24317952:24325668:-	1
mdm-miR166d	DACA002429	1	-1	1	21	569	589	UCGGACCAGGCUUCAUUCCCC	::.:::::::::::::::.	CCGGGAUGAAGCCUGGUCCGG	Cleavage	locus=Chr11:16707398:16716252:-	1
mdm-miR166d	DACA022171	1	-1	1	21	539	559	UCGGACCAGGCUUCAUUCCCC	::.:::::::::::::::.	UUGGGAUGAAGCCUGGUCCGG	Cleavage	locus=Chr02:2486221:2491454:+	1
mdm-miR166d	DACA002672	1	-1	1	21	554	574	UCGGACCAGGCUUCAUUCCCC	::.:::::::::::::::.	CUGGGAUGAAGCCUGGUCCGG	Cleavage	locus=Chr07:12662273:12669644:-	1
mdm-miR166e	DACA022171	1	-1	1	21	539	559	UCGGACCAGGCUUCAUUCCCC	::.:::::::::::::::.	UUGGGAUGAAGCCUGGUCCGG	Cleavage	locus=Chr02:2486221:2491454:+	1
mdm-miR166e	DACA015342	1	-1	1	21	569	589	UCGGACCAGGCUUCAUUCCCC	::.:::::::::::::::.	CCGGGAUGAAGCCUGGUCCGG	Cleavage	locus=Chr07:24317952:24325668:-	1
mdm-miR166e	DACA002429	1	-1	1	21	569	589	UCGGACCAGGCUUCAUUCCCC	::.:::::::::::::::.	CCGGGAUGAAGCCUGGUCCGG	Cleavage	locus=Chr11:16707398:16716252:-	1
mdm-miR166e	DACA002672	1	-1	1	21	554	574	UCGGACCAGGCUUCAUUCCCC	::.:::::::::::::::.	CUGGGAUGAAGCCUGGUCCGG	Cleavage	locus=Chr07:12662273:12669644:-	1
mdm-miR166e	DACA015668	1	-1	1	21	554	574	UCGGACCAGGCUUCAUUCCCC	::.:::::::::::::::.	CUGGGAUGAAGCCUGGUCCGG	Cleavage	locus=Chr08:11066706:11074546:-	1
mdm-miR166f	DACA002672	1	-1	1	21	554	574	UCGGACCAGGCUUCAUUCCCC	::.:::::::::::::::.	CUGGGAUGAAGCCUGGUCCGG	Cleavage	locus=Chr07:12662273:12669644:-	1
mdm-miR166f	DACA015668	1	-1	1	21	554	574	UCGGACCAGGCUUCAUUCCCC	::.:::::::::::::::.	CUGGGAUGAAGCCUGGUCCGG	Cleavage	locus=Chr08:11066706:11074546:-	1
mdm-miR166f	DACA015342	1	-1	1	21	569	589	UCGGACCAGGCUUCAUUCCCC	::.:::::::::::::::.	CCGGGAUGAAGCCUGGUCCGG	Cleavage	locus=Chr07:24317952:24325668:-	1
mdm-miR166f	DACA002429	1	-1	1	21	569	589	UCGGACCAGGCUUCAUUCCCC	::.:::::::::::::::.	CCGGGAUGAAGCCUGGUCCGG	Cleavage	locus=Chr11:16707398:16716252:-	1
mdm-miR166f	DACA022171	1	-1	1	21	539	559	UCGGACCAGGCUUCAUUCCCC	::.:::::::::::::::.	UUGGGAUGAAGCCUGGUCCGG	Cleavage	locus=Chr02:2486221:2491454:+	1
mdm-miR166g	DACA015668	1	-1	1	21	554	574	UCGGACCAGGCUUCAUUCCCC	::.:::::::::::::::.	CUGGGAUGAAGCCUGGUCCGG	Cleavage	locus=Chr08:11066706:11074546:-	1
mdm-miR166g	DACA002672	1	-1	1	21	554	574	UCGGACCAGGCUUCAUUCCCC	::.:::::::::::::::.	CUGGGAUGAAGCCUGGUCCGG	Cleavage	locus=Chr07:12662273:12669644:-	1
mdm-miR166g	DACA015342	1	-1	1	21	569	589	UCGGACCAGGCUUCAUUCCCC	::.:::::::::::::::.	CCGGGAUGAAGCCUGGUCCGG	Cleavage	locus=Chr07:24317952:24325668:-	1
mdm-miR166g	DACA002429	1	-1	1	21	569	589	UCGGACCAGGCUUCAUUCCCC	::.:::::::::::::::.	CCGGGAUGAAGCCUGGUCCGG	Cleavage	locus=Chr11:16707398:16716252:-	1
mdm-miR166g	DACA022171	1	-1	1	21	539	559	UCGGACCAGGCUUCAUUCCCC	::.:::::::::::::::.	UUGGGAUGAAGCCUGGUCCGG	Cleavage	locus=Chr02:2486221:2491454:+	1
mdm-miR166h	DACA002429	1	-1	1	21	569	589	UCGGACCAGGCUUCAUUCCCC	::.:::::::::::::::.	CCGGGAUGAAGCCUGGUCCGG	Cleavage	locus=Chr11:16707398:16716252:-	1
mdm-miR166h	DACA015668	1	-1	1	21	554	574	UCGGACCAGGCUUCAUUCCCC	::.:::::::::::::::.	CUGGGAUGAAGCCUGGUCCGG	Cleavage	locus=Chr08:11066706:11074546:-	1
mdm-miR166h	DACA015342	1	-1	1	21	569	589	UCGGACCAGGCUUCAUUCCCC	::.:::::::::::::::.	CCGGGAUGAAGCCUGGUCCGG	Cleavage	locus=Chr07:24317952:24325668:-	1
mdm-miR166h	DACA002672	1	-1	1	21	554	574	UCGGACCAGGCUUCAUUCCCC	::.:::::::::::::::.	CUGGGAUGAAGCCUGGUCCGG	Cleavage	locus=Chr07:12662273:12669644:-	1
mdm-miR166h	DACA022171	1	-1	1	21	539	559	UCGGACCAGGCUUCAUUCCCC	::.:::::::::::::::.	UUGGGAUGAAGCCUGGUCCGG	Cleavage	locus=Chr02:2486221:2491454:+	1
mdm-miR166i	DACA002672	1	-1	1	21	554	574	UCGGACCAGGCUUCAUUCCCC	::.:::::::::::::::.	CUGGGAUGAAGCCUGGUCCGG	Cleavage	locus=Chr07:12662273:12669644:-	1
mdm-miR166i	DACA002429	1	-1	1	21	569	589	UCGGACCAGGCUUCAUUCCCC	::.:::::::::::::::.	CCGGGAUGAAGCCUGGUCCGG	Cleavage	locus=Chr11:16707398:16716252:-	1
mdm-miR166i	DACA022171	1	-1	1	21	539	559	UCGGACCAGGCUUCAUUCCCC	::.:::::::::::::::.	UUGGGAUGAAGCCUGGUCCGG	Cleavage	locus=Chr02:2486221:2491454:+	1
mdm-miR166i	DACA015668	1	-1	1	21	554	574	UCGGACCAGGCUUCAUUCCCC	::.:::::::::::::::.	CUGGGAUGAAGCCUGGUCCGG	Cleavage	locus=Chr08:11066706:11074546:-	1
mdm-miR166i	DACA015342	1	-1	1	21	569	589	UCGGACCAGGCUUCAUUCCCC	::.:::::::::::::::.	CCGGGAUGAAGCCUGGUCCGG	Cleavage	locus=Chr07:24317952:24325668:-	1
mes-miR166a	DACA015342	1	-1	1	21	569	589	UCGGACCAGGCUUCAUUCCCC	::.:::::::::::::::.	CCGGGAUGAAGCCUGGUCCGG	Cleavage	locus=Chr07:24317952:24325668:-	1
mes-miR166a	DACA002429	1	-1	1	21	569	589	UCGGACCAGGCUUCAUUCCCC	::.:::::::::::::::.	CCGGGAUGAAGCCUGGUCCGG	Cleavage	locus=Chr11:16707398:16716252:-	1
mes-miR166a	DACA002672	1	-1	1	21	554	574	UCGGACCAGGCUUCAUUCCCC	::.:::::::::::::::.	CUGGGAUGAAGCCUGGUCCGG	Cleavage	locus=Chr07:12662273:12669644:-	1
mes-miR166a	DACA022171	1	-1	1	21	539	559	UCGGACCAGGCUUCAUUCCCC	::.:::::::::::::::.	UUGGGAUGAAGCCUGGUCCGG	Cleavage	locus=Chr02:2486221:2491454:+	1
mes-miR166a	DACA015668	1	-1	1	21	554	574	UCGGACCAGGCUUCAUUCCCC	::.:::::::::::::::.	CUGGGAUGAAGCCUGGUCCGG	Cleavage	locus=Chr08:11066706:11074546:-	1
mes-miR166b	DACA002672	1	-1	1	21	554	574	UCGGACCAGGCUUCAUUCCCC	::.:::::::::::::::.	CUGGGAUGAAGCCUGGUCCGG	Cleavage	locus=Chr07:12662273:12669644:-	1
mes-miR166b	DACA015342	1	-1	1	21	569	589	UCGGACCAGGCUUCAUUCCCC	::.:::::::::::::::.	CCGGGAUGAAGCCUGGUCCGG	Cleavage	locus=Chr07:24317952:24325668:-	1
mes-miR166b	DACA002429	1	-1	1	21	569	589	UCGGACCAGGCUUCAUUCCCC	::.:::::::::::::::.	CCGGGAUGAAGCCUGGUCCGG	Cleavage	locus=Chr11:16707398:16716252:-	1
mes-miR166b	DACA022171	1	-1	1	21	539	559	UCGGACCAGGCUUCAUUCCCC	::.:::::::::::::::.	UUGGGAUGAAGCCUGGUCCGG	Cleavage	locus=Chr02:2486221:2491454:+	1
mes-miR166b	DACA015668	1	-1	1	21	554	574	UCGGACCAGGCUUCAUUCCCC	::.:::::::::::::::.	CUGGGAUGAAGCCUGGUCCGG	Cleavage	locus=Chr08:11066706:11074546:-	1
mes-miR166c	DACA002672	1	-1	1	21	554	574	UCGGACCAGGCUUCAUUCCCC	::.:::::::::::::::.	CUGGGAUGAAGCCUGGUCCGG	Cleavage	locus=Chr07:12662273:12669644:-	1
mes-miR166c	DACA022171	1	-1	1	21	539	559	UCGGACCAGGCUUCAUUCCCC	::.:::::::::::::::.	UUGGGAUGAAGCCUGGUCCGG	Cleavage	locus=Chr02:2486221:2491454:+	1
mes-miR166c	DACA015668	1	-1	1	21	554	574	UCGGACCAGGCUUCAUUCCCC	::.:::::::::::::::.	CUGGGAUGAAGCCUGGUCCGG	Cleavage	locus=Chr08:11066706:11074546:-	1
mes-miR166c	DACA015342	1	-1	1	21	569	589	UCGGACCAGGCUUCAUUCCCC	::.:::::::::::::::.	CCGGGAUGAAGCCUGGUCCGG	Cleavage	locus=Chr07:24317952:24325668:-	1
mes-miR166c	DACA002429	1	-1	1	21	569	589	UCGGACCAGGCUUCAUUCCCC	::.:::::::::::::::.	CCGGGAUGAAGCCUGGUCCGG	Cleavage	locus=Chr11:16707398:16716252:-	1
mes-miR166d	DACA015668	1	-1	1	21	554	574	UCGGACCAGGCUUCAUUCCCC	::.:::::::::::::::.	CUGGGAUGAAGCCUGGUCCGG	Cleavage	locus=Chr08:11066706:11074546:-	1
mes-miR166d	DACA002429	1	-1	1	21	569	589	UCGGACCAGGCUUCAUUCCCC	::.:::::::::::::::.	CCGGGAUGAAGCCUGGUCCGG	Cleavage	locus=Chr11:16707398:16716252:-	1
mes-miR166d	DACA002672	1	-1	1	21	554	574	UCGGACCAGGCUUCAUUCCCC	::.:::::::::::::::.	CUGGGAUGAAGCCUGGUCCGG	Cleavage	locus=Chr07:12662273:12669644:-	1
mes-miR166d	DACA015342	1	-1	1	21	569	589	UCGGACCAGGCUUCAUUCCCC	::.:::::::::::::::.	CCGGGAUGAAGCCUGGUCCGG	Cleavage	locus=Chr07:24317952:24325668:-	1
mes-miR166d	DACA022171	1	-1	1	21	539	559	UCGGACCAGGCUUCAUUCCCC	::.:::::::::::::::.	UUGGGAUGAAGCCUGGUCCGG	Cleavage	locus=Chr02:2486221:2491454:+	1
mes-miR166e	DACA015668	1	-1	1	21	554	574	UCGGACCAGGCUUCAUUCCCC	::.:::::::::::::::.	CUGGGAUGAAGCCUGGUCCGG	Cleavage	locus=Chr08:11066706:11074546:-	1
mes-miR166e	DACA015342	1	-1	1	21	569	589	UCGGACCAGGCUUCAUUCCCC	::.:::::::::::::::.	CCGGGAUGAAGCCUGGUCCGG	Cleavage	locus=Chr07:24317952:24325668:-	1
mes-miR166e	DACA022171	1	-1	1	21	539	559	UCGGACCAGGCUUCAUUCCCC	::.:::::::::::::::.	UUGGGAUGAAGCCUGGUCCGG	Cleavage	locus=Chr02:2486221:2491454:+	1
mes-miR166e	DACA002672	1	-1	1	21	554	574	UCGGACCAGGCUUCAUUCCCC	::.:::::::::::::::.	CUGGGAUGAAGCCUGGUCCGG	Cleavage	locus=Chr07:12662273:12669644:-	1
mes-miR166e	DACA002429	1	-1	1	21	569	589	UCGGACCAGGCUUCAUUCCCC	::.:::::::::::::::.	CCGGGAUGAAGCCUGGUCCGG	Cleavage	locus=Chr11:16707398:16716252:-	1
mes-miR166f	DACA002429	1	-1	1	21	569	589	UCGGACCAGGCUUCAUUCCCC	::.:::::::::::::::.	CCGGGAUGAAGCCUGGUCCGG	Cleavage	locus=Chr11:16707398:16716252:-	1
mes-miR166f	DACA002672	1	-1	1	21	554	574	UCGGACCAGGCUUCAUUCCCC	::.:::::::::::::::.	CUGGGAUGAAGCCUGGUCCGG	Cleavage	locus=Chr07:12662273:12669644:-	1
mes-miR166f	DACA015668	1	-1	1	21	554	574	UCGGACCAGGCUUCAUUCCCC	::.:::::::::::::::.	CUGGGAUGAAGCCUGGUCCGG	Cleavage	locus=Chr08:11066706:11074546:-	1
mes-miR166f	DACA015342	1	-1	1	21	569	589	UCGGACCAGGCUUCAUUCCCC	::.:::::::::::::::.	CCGGGAUGAAGCCUGGUCCGG	Cleavage	locus=Chr07:24317952:24325668:-	1
mes-miR166f	DACA022171	1	-1	1	21	539	559	UCGGACCAGGCUUCAUUCCCC	::.:::::::::::::::.	UUGGGAUGAAGCCUGGUCCGG	Cleavage	locus=Chr02:2486221:2491454:+	1
mes-miR166g	DACA015342	1	-1	1	21	569	589	UCGGACCAGGCUUCAUUCCCC	::.:::::::::::::::.	CCGGGAUGAAGCCUGGUCCGG	Cleavage	locus=Chr07:24317952:24325668:-	1
mes-miR166g	DACA002429	1	-1	1	21	569	589	UCGGACCAGGCUUCAUUCCCC	::.:::::::::::::::.	CCGGGAUGAAGCCUGGUCCGG	Cleavage	locus=Chr11:16707398:16716252:-	1
mes-miR166g	DACA002672	1	-1	1	21	554	574	UCGGACCAGGCUUCAUUCCCC	::.:::::::::::::::.	CUGGGAUGAAGCCUGGUCCGG	Cleavage	locus=Chr07:12662273:12669644:-	1
mes-miR166g	DACA015668	1	-1	1	21	554	574	UCGGACCAGGCUUCAUUCCCC	::.:::::::::::::::.	CUGGGAUGAAGCCUGGUCCGG	Cleavage	locus=Chr08:11066706:11074546:-	1
mes-miR166g	DACA022171	1	-1	1	21	539	559	UCGGACCAGGCUUCAUUCCCC	::.:::::::::::::::.	UUGGGAUGAAGCCUGGUCCGG	Cleavage	locus=Chr02:2486221:2491454:+	1
mes-miR166h	DACA002672	1	-1	1	22	553	574	UCGGACCAGGCUUCAUUCCCGU	: ::.:::::::::::::::.	CCUGGGAUGAAGCCUGGUCCGG	Cleavage	locus=Chr07:12662273:12669644:-	1
mes-miR166h	DACA015668	1	-1	1	22	553	574	UCGGACCAGGCUUCAUUCCCGU	: ::.:::::::::::::::.	CCUGGGAUGAAGCCUGGUCCGG	Cleavage	locus=Chr08:11066706:11074546:-	1
mes-miR166h	DACA015342	1	-1	1	22	568	589	UCGGACCAGGCUUCAUUCCCGU	: ::.:::::::::::::::.	CCCGGGAUGAAGCCUGGUCCGG	Cleavage	locus=Chr07:24317952:24325668:-	1
mes-miR166h	DACA002429	1	-1	1	22	568	589	UCGGACCAGGCUUCAUUCCCGU	: ::.:::::::::::::::.	CCCGGGAUGAAGCCUGGUCCGG	Cleavage	locus=Chr11:16707398:16716252:-	1
mes-miR166h	DACA022171	1	-1	1	22	538	559	UCGGACCAGGCUUCAUUCCCGU	::.:::::::::::::::.	CUUGGGAUGAAGCCUGGUCCGG	Cleavage	locus=Chr02:2486221:2491454:+	1
mes-miR166j	DACA015668	1	-1	1	21	554	574	UCGGACCAGGCUUCAUUCCUC	::.:::::::::::::::.	CUGGGAUGAAGCCUGGUCCGG	Cleavage	locus=Chr08:11066706:11074546:-	1
mes-miR166j	DACA015342	1	-1	1	21	569	589	UCGGACCAGGCUUCAUUCCUC	::.:::::::::::::::.	CCGGGAUGAAGCCUGGUCCGG	Cleavage	locus=Chr07:24317952:24325668:-	1
mes-miR166j	DACA002429	1	-1	1	21	569	589	UCGGACCAGGCUUCAUUCCUC	::.:::::::::::::::.	CCGGGAUGAAGCCUGGUCCGG	Cleavage	locus=Chr11:16707398:16716252:-	1
mes-miR166j	DACA002672	1	-1	1	21	554	574	UCGGACCAGGCUUCAUUCCUC	::.:::::::::::::::.	CUGGGAUGAAGCCUGGUCCGG	Cleavage	locus=Chr07:12662273:12669644:-	1
mes-miR166j	DACA022171	1	-1	1	21	539	559	UCGGACCAGGCUUCAUUCCUC	::.:::::::::::::::.	UUGGGAUGAAGCCUGGUCCGG	Cleavage	locus=Chr02:2486221:2491454:+	1
mtr-miR166a	DACA002672	1	-1	1	21	554	574	UCGGACCAGGCUUCAUUCCCC	::.:::::::::::::::.	CUGGGAUGAAGCCUGGUCCGG	Cleavage	locus=Chr07:12662273:12669644:-	1
mtr-miR166a	DACA015668	1	-1	1	21	554	574	UCGGACCAGGCUUCAUUCCCC	::.:::::::::::::::.	CUGGGAUGAAGCCUGGUCCGG	Cleavage	locus=Chr08:11066706:11074546:-	1
mtr-miR166a	DACA015342	1	-1	1	21	569	589	UCGGACCAGGCUUCAUUCCCC	::.:::::::::::::::.	CCGGGAUGAAGCCUGGUCCGG	Cleavage	locus=Chr07:24317952:24325668:-	1
mtr-miR166a	DACA002429	1	-1	1	21	569	589	UCGGACCAGGCUUCAUUCCCC	::.:::::::::::::::.	CCGGGAUGAAGCCUGGUCCGG	Cleavage	locus=Chr11:16707398:16716252:-	1
mtr-miR166a	DACA022171	1	-1	1	21	539	559	UCGGACCAGGCUUCAUUCCCC	::.:::::::::::::::.	UUGGGAUGAAGCCUGGUCCGG	Cleavage	locus=Chr02:2486221:2491454:+	1
mtr-miR166b	DACA022171	1	-1	1	21	539	559	UCGGACCAGGCUUCAUUCCUA	: ::.:::::::::::::::.	UUGGGAUGAAGCCUGGUCCGG	Cleavage	locus=Chr02:2486221:2491454:+	1
mtr-miR166b	DACA015668	1	-1	1	21	554	574	UCGGACCAGGCUUCAUUCCUA	::.:::::::::::::::.	CUGGGAUGAAGCCUGGUCCGG	Cleavage	locus=Chr08:11066706:11074546:-	1
mtr-miR166b	DACA002672	1	-1	1	21	554	574	UCGGACCAGGCUUCAUUCCUA	::.:::::::::::::::.	CUGGGAUGAAGCCUGGUCCGG	Cleavage	locus=Chr07:12662273:12669644:-	1
mtr-miR166b	DACA015342	1	-1	1	21	569	589	UCGGACCAGGCUUCAUUCCUA	::.:::::::::::::::.	CCGGGAUGAAGCCUGGUCCGG	Cleavage	locus=Chr07:24317952:24325668:-	1
mtr-miR166b	DACA002429	1	-1	1	21	569	589	UCGGACCAGGCUUCAUUCCUA	::.:::::::::::::::.	CCGGGAUGAAGCCUGGUCCGG	Cleavage	locus=Chr11:16707398:16716252:-	1
mtr-miR166c	DACA015668	1	-1	1	21	554	574	UCGGACCAGGCUUCAUUCCUC	::.:::::::::::::::.	CUGGGAUGAAGCCUGGUCCGG	Cleavage	locus=Chr08:11066706:11074546:-	1
mtr-miR166c	DACA002672	1	-1	1	21	554	574	UCGGACCAGGCUUCAUUCCUC	::.:::::::::::::::.	CUGGGAUGAAGCCUGGUCCGG	Cleavage	locus=Chr07:12662273:12669644:-	1
mtr-miR166c	DACA022171	1	-1	1	21	539	559	UCGGACCAGGCUUCAUUCCUC	::.:::::::::::::::.	UUGGGAUGAAGCCUGGUCCGG	Cleavage	locus=Chr02:2486221:2491454:+	1
mtr-miR166c	DACA015342	1	-1	1	21	569	589	UCGGACCAGGCUUCAUUCCUC	::.:::::::::::::::.	CCGGGAUGAAGCCUGGUCCGG	Cleavage	locus=Chr07:24317952:24325668:-	1
mtr-miR166c	DACA002429	1	-1	1	21	569	589	UCGGACCAGGCUUCAUUCCUC	::.:::::::::::::::.	CCGGGAUGAAGCCUGGUCCGG	Cleavage	locus=Chr11:16707398:16716252:-	1
mtr-miR166d	DACA002429	1	-1	1	21	569	589	UCGGGCCAGGCUUCAUCCCCC	::::::::::::::.:::.	CCGGGAUGAAGCCUGGUCCGG	Cleavage	locus=Chr11:16707398:16716252:-	1
mtr-miR166d	DACA002672	1	-1	1	21	554	574	UCGGGCCAGGCUUCAUCCCCC	::::::::::::::.:::.	CUGGGAUGAAGCCUGGUCCGG	Cleavage	locus=Chr07:12662273:12669644:-	1
mtr-miR166d	DACA015668	1	-1	1	21	554	574	UCGGGCCAGGCUUCAUCCCCC	::::::::::::::.:::.	CUGGGAUGAAGCCUGGUCCGG	Cleavage	locus=Chr08:11066706:11074546:-	1
mtr-miR166d	DACA015342	1	-1	1	21	569	589	UCGGGCCAGGCUUCAUCCCCC	::::::::::::::.:::.	CCGGGAUGAAGCCUGGUCCGG	Cleavage	locus=Chr07:24317952:24325668:-	1
mtr-miR166d	DACA022171	1	-1	1	21	539	559	UCGGGCCAGGCUUCAUCCCCC	::::::::::::::.:::.	UUGGGAUGAAGCCUGGUCCGG	Cleavage	locus=Chr02:2486221:2491454:+	1
mtr-miR166e-3p	DACA022171	1	-1	1	21	539	559	UCGGACCAGGCUUCAUUCCCC	::.:::::::::::::::.	UUGGGAUGAAGCCUGGUCCGG	Cleavage	locus=Chr02:2486221:2491454:+	1
mtr-miR166e-3p	DACA002672	1	-1	1	21	554	574	UCGGACCAGGCUUCAUUCCCC	::.:::::::::::::::.	CUGGGAUGAAGCCUGGUCCGG	Cleavage	locus=Chr07:12662273:12669644:-	1
mtr-miR166e-3p	DACA015342	1	-1	1	21	569	589	UCGGACCAGGCUUCAUUCCCC	::.:::::::::::::::.	CCGGGAUGAAGCCUGGUCCGG	Cleavage	locus=Chr07:24317952:24325668:-	1
mtr-miR166e-3p	DACA002429	1	-1	1	21	569	589	UCGGACCAGGCUUCAUUCCCC	::.:::::::::::::::.	CCGGGAUGAAGCCUGGUCCGG	Cleavage	locus=Chr11:16707398:16716252:-	1
mtr-miR166e-3p	DACA015668	1	-1	1	21	554	574	UCGGACCAGGCUUCAUUCCCC	::.:::::::::::::::.	CUGGGAUGAAGCCUGGUCCGG	Cleavage	locus=Chr08:11066706:11074546:-	1
mtr-miR166f	DACA002429	1	-1	1	21	569	589	UCGGACCAGGCUUCAUUCCUC	::.:::::::::::::::.	CCGGGAUGAAGCCUGGUCCGG	Cleavage	locus=Chr11:16707398:16716252:-	1
mtr-miR166f	DACA022171	1	-1	1	21	539	559	UCGGACCAGGCUUCAUUCCUC	::.:::::::::::::::.	UUGGGAUGAAGCCUGGUCCGG	Cleavage	locus=Chr02:2486221:2491454:+	1
mtr-miR166f	DACA002672	1	-1	1	21	554	574	UCGGACCAGGCUUCAUUCCUC	::.:::::::::::::::.	CUGGGAUGAAGCCUGGUCCGG	Cleavage	locus=Chr07:12662273:12669644:-	1
mtr-miR166f	DACA015668	1	-1	1	21	554	574	UCGGACCAGGCUUCAUUCCUC	::.:::::::::::::::.	CUGGGAUGAAGCCUGGUCCGG	Cleavage	locus=Chr08:11066706:11074546:-	1
mtr-miR166f	DACA015342	1	-1	1	21	569	589	UCGGACCAGGCUUCAUUCCUC	::.:::::::::::::::.	CCGGGAUGAAGCCUGGUCCGG	Cleavage	locus=Chr07:24317952:24325668:-	1
mtr-miR166g-3p	DACA002672	1	-1	1	21	554	574	UCGGACCAGGCUUCAUUCCCC	::.:::::::::::::::.	CUGGGAUGAAGCCUGGUCCGG	Cleavage	locus=Chr07:12662273:12669644:-	1
mtr-miR166g-3p	DACA015668	1	-1	1	21	554	574	UCGGACCAGGCUUCAUUCCCC	::.:::::::::::::::.	CUGGGAUGAAGCCUGGUCCGG	Cleavage	locus=Chr08:11066706:11074546:-	1
mtr-miR166g-3p	DACA015342	1	-1	1	21	569	589	UCGGACCAGGCUUCAUUCCCC	::.:::::::::::::::.	CCGGGAUGAAGCCUGGUCCGG	Cleavage	locus=Chr07:24317952:24325668:-	1
mtr-miR166g-3p	DACA002429	1	-1	1	21	569	589	UCGGACCAGGCUUCAUUCCCC	::.:::::::::::::::.	CCGGGAUGAAGCCUGGUCCGG	Cleavage	locus=Chr11:16707398:16716252:-	1
mtr-miR166g-3p	DACA022171	1	-1	1	21	539	559	UCGGACCAGGCUUCAUUCCCC	::.:::::::::::::::.	UUGGGAUGAAGCCUGGUCCGG	Cleavage	locus=Chr02:2486221:2491454:+	1
nta-miR166a	DACA002429	1	-1	1	21	569	589	UCGGACCAGGCUUCAUUCCCC	::.:::::::::::::::.	CCGGGAUGAAGCCUGGUCCGG	Cleavage	locus=Chr11:16707398:16716252:-	1
nta-miR166a	DACA015668	1	-1	1	21	554	574	UCGGACCAGGCUUCAUUCCCC	::.:::::::::::::::.	CUGGGAUGAAGCCUGGUCCGG	Cleavage	locus=Chr08:11066706:11074546:-	1
nta-miR166a	DACA022171	1	-1	1	21	539	559	UCGGACCAGGCUUCAUUCCCC	::.:::::::::::::::.	UUGGGAUGAAGCCUGGUCCGG	Cleavage	locus=Chr02:2486221:2491454:+	1
nta-miR166a	DACA002672	1	-1	1	21	554	574	UCGGACCAGGCUUCAUUCCCC	::.:::::::::::::::.	CUGGGAUGAAGCCUGGUCCGG	Cleavage	locus=Chr07:12662273:12669644:-	1
nta-miR166a	DACA015342	1	-1	1	21	569	589	UCGGACCAGGCUUCAUUCCCC	::.:::::::::::::::.	CCGGGAUGAAGCCUGGUCCGG	Cleavage	locus=Chr07:24317952:24325668:-	1
nta-miR166b	DACA015342	1	-1	1	21	569	589	UCGGACCAGGCUUCAUUCCCC	::.:::::::::::::::.	CCGGGAUGAAGCCUGGUCCGG	Cleavage	locus=Chr07:24317952:24325668:-	1
nta-miR166b	DACA022171	1	-1	1	21	539	559	UCGGACCAGGCUUCAUUCCCC	::.:::::::::::::::.	UUGGGAUGAAGCCUGGUCCGG	Cleavage	locus=Chr02:2486221:2491454:+	1
nta-miR166b	DACA002672	1	-1	1	21	554	574	UCGGACCAGGCUUCAUUCCCC	::.:::::::::::::::.	CUGGGAUGAAGCCUGGUCCGG	Cleavage	locus=Chr07:12662273:12669644:-	1
nta-miR166b	DACA002429	1	-1	1	21	569	589	UCGGACCAGGCUUCAUUCCCC	::.:::::::::::::::.	CCGGGAUGAAGCCUGGUCCGG	Cleavage	locus=Chr11:16707398:16716252:-	1
nta-miR166b	DACA015668	1	-1	1	21	554	574	UCGGACCAGGCUUCAUUCCCC	::.:::::::::::::::.	CUGGGAUGAAGCCUGGUCCGG	Cleavage	locus=Chr08:11066706:11074546:-	1
nta-miR166c	DACA002429	1	-1	1	21	569	589	UCGGACCAGGCUUCAUUCCCC	::.:::::::::::::::.	CCGGGAUGAAGCCUGGUCCGG	Cleavage	locus=Chr11:16707398:16716252:-	1
nta-miR166c	DACA015668	1	-1	1	21	554	574	UCGGACCAGGCUUCAUUCCCC	::.:::::::::::::::.	CUGGGAUGAAGCCUGGUCCGG	Cleavage	locus=Chr08:11066706:11074546:-	1
nta-miR166c	DACA015342	1	-1	1	21	569	589	UCGGACCAGGCUUCAUUCCCC	::.:::::::::::::::.	CCGGGAUGAAGCCUGGUCCGG	Cleavage	locus=Chr07:24317952:24325668:-	1
nta-miR166c	DACA022171	1	-1	1	21	539	559	UCGGACCAGGCUUCAUUCCCC	::.:::::::::::::::.	UUGGGAUGAAGCCUGGUCCGG	Cleavage	locus=Chr02:2486221:2491454:+	1
nta-miR166c	DACA002672	1	-1	1	21	554	574	UCGGACCAGGCUUCAUUCCCC	::.:::::::::::::::.	CUGGGAUGAAGCCUGGUCCGG	Cleavage	locus=Chr07:12662273:12669644:-	1
nta-miR166d	DACA002672	1	-1	1	21	554	574	UCGGACCAGGCUUCAUUCCCC	::.:::::::::::::::.	CUGGGAUGAAGCCUGGUCCGG	Cleavage	locus=Chr07:12662273:12669644:-	1
nta-miR166d	DACA002429	1	-1	1	21	569	589	UCGGACCAGGCUUCAUUCCCC	::.:::::::::::::::.	CCGGGAUGAAGCCUGGUCCGG	Cleavage	locus=Chr11:16707398:16716252:-	1
nta-miR166d	DACA015668	1	-1	1	21	554	574	UCGGACCAGGCUUCAUUCCCC	::.:::::::::::::::.	CUGGGAUGAAGCCUGGUCCGG	Cleavage	locus=Chr08:11066706:11074546:-	1
nta-miR166d	DACA015342	1	-1	1	21	569	589	UCGGACCAGGCUUCAUUCCCC	::.:::::::::::::::.	CCGGGAUGAAGCCUGGUCCGG	Cleavage	locus=Chr07:24317952:24325668:-	1
nta-miR166d	DACA022171	1	-1	1	21	539	559	UCGGACCAGGCUUCAUUCCCC	::.:::::::::::::::.	UUGGGAUGAAGCCUGGUCCGG	Cleavage	locus=Chr02:2486221:2491454:+	1
nta-miR166e	DACA015342	1	-1	1	21	569	589	UCGGACCAGGCUUCAUUCCCC	::.:::::::::::::::.	CCGGGAUGAAGCCUGGUCCGG	Cleavage	locus=Chr07:24317952:24325668:-	1
nta-miR166e	DACA002672	1	-1	1	21	554	574	UCGGACCAGGCUUCAUUCCCC	::.:::::::::::::::.	CUGGGAUGAAGCCUGGUCCGG	Cleavage	locus=Chr07:12662273:12669644:-	1
nta-miR166e	DACA022171	1	-1	1	21	539	559	UCGGACCAGGCUUCAUUCCCC	::.:::::::::::::::.	UUGGGAUGAAGCCUGGUCCGG	Cleavage	locus=Chr02:2486221:2491454:+	1
nta-miR166e	DACA015668	1	-1	1	21	554	574	UCGGACCAGGCUUCAUUCCCC	::.:::::::::::::::.	CUGGGAUGAAGCCUGGUCCGG	Cleavage	locus=Chr08:11066706:11074546:-	1
nta-miR166e	DACA002429	1	-1	1	21	569	589	UCGGACCAGGCUUCAUUCCCC	::.:::::::::::::::.	CCGGGAUGAAGCCUGGUCCGG	Cleavage	locus=Chr11:16707398:16716252:-	1
nta-miR166f	DACA002672	1	-1	1	21	554	574	UCGGACCAGGCUUCAUUCCCC	::.:::::::::::::::.	CUGGGAUGAAGCCUGGUCCGG	Cleavage	locus=Chr07:12662273:12669644:-	1
nta-miR166f	DACA022171	1	-1	1	21	539	559	UCGGACCAGGCUUCAUUCCCC	::.:::::::::::::::.	UUGGGAUGAAGCCUGGUCCGG	Cleavage	locus=Chr02:2486221:2491454:+	1
nta-miR166f	DACA015668	1	-1	1	21	554	574	UCGGACCAGGCUUCAUUCCCC	::.:::::::::::::::.	CUGGGAUGAAGCCUGGUCCGG	Cleavage	locus=Chr08:11066706:11074546:-	1
nta-miR166f	DACA015342	1	-1	1	21	569	589	UCGGACCAGGCUUCAUUCCCC	::.:::::::::::::::.	CCGGGAUGAAGCCUGGUCCGG	Cleavage	locus=Chr07:24317952:24325668:-	1
nta-miR166f	DACA002429	1	-1	1	21	569	589	UCGGACCAGGCUUCAUUCCCC	::.:::::::::::::::.	CCGGGAUGAAGCCUGGUCCGG	Cleavage	locus=Chr11:16707398:16716252:-	1
nta-miR166g	DACA002429	1	-1	1	21	569	589	UCGGACCAGGCUUCAUUCCCC	::.:::::::::::::::.	CCGGGAUGAAGCCUGGUCCGG	Cleavage	locus=Chr11:16707398:16716252:-	1
nta-miR166g	DACA015668	1	-1	1	21	554	574	UCGGACCAGGCUUCAUUCCCC	::.:::::::::::::::.	CUGGGAUGAAGCCUGGUCCGG	Cleavage	locus=Chr08:11066706:11074546:-	1
nta-miR166g	DACA015342	1	-1	1	21	569	589	UCGGACCAGGCUUCAUUCCCC	::.:::::::::::::::.	CCGGGAUGAAGCCUGGUCCGG	Cleavage	locus=Chr07:24317952:24325668:-	1
nta-miR166g	DACA022171	1	-1	1	21	539	559	UCGGACCAGGCUUCAUUCCCC	::.:::::::::::::::.	UUGGGAUGAAGCCUGGUCCGG	Cleavage	locus=Chr02:2486221:2491454:+	1
nta-miR166g	DACA002672	1	-1	1	21	554	574	UCGGACCAGGCUUCAUUCCCC	::.:::::::::::::::.	CUGGGAUGAAGCCUGGUCCGG	Cleavage	locus=Chr07:12662273:12669644:-	1
nta-miR166h	DACA002672	1	-1	1	21	554	574	UCGGACCAGGCUUCAUUCCCC	::.:::::::::::::::.	CUGGGAUGAAGCCUGGUCCGG	Cleavage	locus=Chr07:12662273:12669644:-	1
nta-miR166h	DACA015668	1	-1	1	21	554	574	UCGGACCAGGCUUCAUUCCCC	::.:::::::::::::::.	CUGGGAUGAAGCCUGGUCCGG	Cleavage	locus=Chr08:11066706:11074546:-	1
nta-miR166h	DACA022171	1	-1	1	21	539	559	UCGGACCAGGCUUCAUUCCCC	::.:::::::::::::::.	UUGGGAUGAAGCCUGGUCCGG	Cleavage	locus=Chr02:2486221:2491454:+	1
nta-miR166h	DACA015342	1	-1	1	21	569	589	UCGGACCAGGCUUCAUUCCCC	::.:::::::::::::::.	CCGGGAUGAAGCCUGGUCCGG	Cleavage	locus=Chr07:24317952:24325668:-	1
nta-miR166h	DACA002429	1	-1	1	21	569	589	UCGGACCAGGCUUCAUUCCCC	::.:::::::::::::::.	CCGGGAUGAAGCCUGGUCCGG	Cleavage	locus=Chr11:16707398:16716252:-	1
osa-miR166a-3p	DACA022171	1	-1	1	21	539	559	UCGGACCAGGCUUCAUUCCCC	::.:::::::::::::::.	UUGGGAUGAAGCCUGGUCCGG	Cleavage	locus=Chr02:2486221:2491454:+	1
osa-miR166a-3p	DACA002429	1	-1	1	21	569	589	UCGGACCAGGCUUCAUUCCCC	::.:::::::::::::::.	CCGGGAUGAAGCCUGGUCCGG	Cleavage	locus=Chr11:16707398:16716252:-	1
osa-miR166a-3p	DACA015668	1	-1	1	21	554	574	UCGGACCAGGCUUCAUUCCCC	::.:::::::::::::::.	CUGGGAUGAAGCCUGGUCCGG	Cleavage	locus=Chr08:11066706:11074546:-	1
osa-miR166a-3p	DACA002672	1	-1	1	21	554	574	UCGGACCAGGCUUCAUUCCCC	::.:::::::::::::::.	CUGGGAUGAAGCCUGGUCCGG	Cleavage	locus=Chr07:12662273:12669644:-	1
osa-miR166a-3p	DACA015342	1	-1	1	21	569	589	UCGGACCAGGCUUCAUUCCCC	::.:::::::::::::::.	CCGGGAUGAAGCCUGGUCCGG	Cleavage	locus=Chr07:24317952:24325668:-	1
osa-miR166b-3p	DACA015342	1	-1	1	21	569	589	UCGGACCAGGCUUCAUUCCCC	::.:::::::::::::::.	CCGGGAUGAAGCCUGGUCCGG	Cleavage	locus=Chr07:24317952:24325668:-	1
osa-miR166b-3p	DACA002429	1	-1	1	21	569	589	UCGGACCAGGCUUCAUUCCCC	::.:::::::::::::::.	CCGGGAUGAAGCCUGGUCCGG	Cleavage	locus=Chr11:16707398:16716252:-	1
osa-miR166b-3p	DACA022171	1	-1	1	21	539	559	UCGGACCAGGCUUCAUUCCCC	::.:::::::::::::::.	UUGGGAUGAAGCCUGGUCCGG	Cleavage	locus=Chr02:2486221:2491454:+	1
osa-miR166b-3p	DACA002672	1	-1	1	21	554	574	UCGGACCAGGCUUCAUUCCCC	::.:::::::::::::::.	CUGGGAUGAAGCCUGGUCCGG	Cleavage	locus=Chr07:12662273:12669644:-	1
osa-miR166b-3p	DACA015668	1	-1	1	21	554	574	UCGGACCAGGCUUCAUUCCCC	::.:::::::::::::::.	CUGGGAUGAAGCCUGGUCCGG	Cleavage	locus=Chr08:11066706:11074546:-	1
osa-miR166c-3p	DACA015668	1	-1	1	21	554	574	UCGGACCAGGCUUCAUUCCCC	::.:::::::::::::::.	CUGGGAUGAAGCCUGGUCCGG	Cleavage	locus=Chr08:11066706:11074546:-	1
osa-miR166c-3p	DACA015342	1	-1	1	21	569	589	UCGGACCAGGCUUCAUUCCCC	::.:::::::::::::::.	CCGGGAUGAAGCCUGGUCCGG	Cleavage	locus=Chr07:24317952:24325668:-	1
osa-miR166c-3p	DACA002429	1	-1	1	21	569	589	UCGGACCAGGCUUCAUUCCCC	::.:::::::::::::::.	CCGGGAUGAAGCCUGGUCCGG	Cleavage	locus=Chr11:16707398:16716252:-	1
osa-miR166c-3p	DACA002672	1	-1	1	21	554	574	UCGGACCAGGCUUCAUUCCCC	::.:::::::::::::::.	CUGGGAUGAAGCCUGGUCCGG	Cleavage	locus=Chr07:12662273:12669644:-	1
osa-miR166c-3p	DACA022171	1	-1	1	21	539	559	UCGGACCAGGCUUCAUUCCCC	::.:::::::::::::::.	UUGGGAUGAAGCCUGGUCCGG	Cleavage	locus=Chr02:2486221:2491454:+	1
osa-miR166d-3p	DACA015342	1	-1	1	21	569	589	UCGGACCAGGCUUCAUUCCCC	::.:::::::::::::::.	CCGGGAUGAAGCCUGGUCCGG	Cleavage	locus=Chr07:24317952:24325668:-	1
osa-miR166d-3p	DACA002429	1	-1	1	21	569	589	UCGGACCAGGCUUCAUUCCCC	::.:::::::::::::::.	CCGGGAUGAAGCCUGGUCCGG	Cleavage	locus=Chr11:16707398:16716252:-	1
osa-miR166d-3p	DACA022171	1	-1	1	21	539	559	UCGGACCAGGCUUCAUUCCCC	::.:::::::::::::::.	UUGGGAUGAAGCCUGGUCCGG	Cleavage	locus=Chr02:2486221:2491454:+	1
osa-miR166d-3p	DACA002672	1	-1	1	21	554	574	UCGGACCAGGCUUCAUUCCCC	::.:::::::::::::::.	CUGGGAUGAAGCCUGGUCCGG	Cleavage	locus=Chr07:12662273:12669644:-	1
osa-miR166d-3p	DACA015668	1	-1	1	21	554	574	UCGGACCAGGCUUCAUUCCCC	::.:::::::::::::::.	CUGGGAUGAAGCCUGGUCCGG	Cleavage	locus=Chr08:11066706:11074546:-	1
osa-miR166f	DACA002672	1	-1	1	21	554	574	UCGGACCAGGCUUCAUUCCCC	::.:::::::::::::::.	CUGGGAUGAAGCCUGGUCCGG	Cleavage	locus=Chr07:12662273:12669644:-	1
osa-miR166f	DACA022171	1	-1	1	21	539	559	UCGGACCAGGCUUCAUUCCCC	::.:::::::::::::::.	UUGGGAUGAAGCCUGGUCCGG	Cleavage	locus=Chr02:2486221:2491454:+	1
osa-miR166f	DACA015668	1	-1	1	21	554	574	UCGGACCAGGCUUCAUUCCCC	::.:::::::::::::::.	CUGGGAUGAAGCCUGGUCCGG	Cleavage	locus=Chr08:11066706:11074546:-	1
osa-miR166f	DACA015342	1	-1	1	21	569	589	UCGGACCAGGCUUCAUUCCCC	::.:::::::::::::::.	CCGGGAUGAAGCCUGGUCCGG	Cleavage	locus=Chr07:24317952:24325668:-	1
osa-miR166f	DACA002429	1	-1	1	21	569	589	UCGGACCAGGCUUCAUUCCCC	::.:::::::::::::::.	CCGGGAUGAAGCCUGGUCCGG	Cleavage	locus=Chr11:16707398:16716252:-	1
osa-miR166g-3p	DACA015668	1	-1	1	21	554	574	UCGGACCAGGCUUCAUUCCUC	::.:::::::::::::::.	CUGGGAUGAAGCCUGGUCCGG	Cleavage	locus=Chr08:11066706:11074546:-	1
osa-miR166g-3p	DACA022171	1	-1	1	21	539	559	UCGGACCAGGCUUCAUUCCUC	::.:::::::::::::::.	UUGGGAUGAAGCCUGGUCCGG	Cleavage	locus=Chr02:2486221:2491454:+	1
osa-miR166g-3p	DACA015342	1	-1	1	21	569	589	UCGGACCAGGCUUCAUUCCUC	::.:::::::::::::::.	CCGGGAUGAAGCCUGGUCCGG	Cleavage	locus=Chr07:24317952:24325668:-	1
osa-miR166g-3p	DACA002429	1	-1	1	21	569	589	UCGGACCAGGCUUCAUUCCUC	::.:::::::::::::::.	CCGGGAUGAAGCCUGGUCCGG	Cleavage	locus=Chr11:16707398:16716252:-	1
osa-miR166g-3p	DACA002672	1	-1	1	21	554	574	UCGGACCAGGCUUCAUUCCUC	::.:::::::::::::::.	CUGGGAUGAAGCCUGGUCCGG	Cleavage	locus=Chr07:12662273:12669644:-	1
osa-miR166h-3p	DACA022171	1	-1	1	21	539	559	UCGGACCAGGCUUCAUUCCUC	::.:::::::::::::::.	UUGGGAUGAAGCCUGGUCCGG	Cleavage	locus=Chr02:2486221:2491454:+	1
osa-miR166h-3p	DACA015668	1	-1	1	21	554	574	UCGGACCAGGCUUCAUUCCUC	::.:::::::::::::::.	CUGGGAUGAAGCCUGGUCCGG	Cleavage	locus=Chr08:11066706:11074546:-	1
osa-miR166h-3p	DACA015342	1	-1	1	21	569	589	UCGGACCAGGCUUCAUUCCUC	::.:::::::::::::::.	CCGGGAUGAAGCCUGGUCCGG	Cleavage	locus=Chr07:24317952:24325668:-	1
osa-miR166h-3p	DACA002429	1	-1	1	21	569	589	UCGGACCAGGCUUCAUUCCUC	::.:::::::::::::::.	CCGGGAUGAAGCCUGGUCCGG	Cleavage	locus=Chr11:16707398:16716252:-	1
osa-miR166h-3p	DACA002672	1	-1	1	21	554	574	UCGGACCAGGCUUCAUUCCUC	::.:::::::::::::::.	CUGGGAUGAAGCCUGGUCCGG	Cleavage	locus=Chr07:12662273:12669644:-	1
osa-miR166j-3p	DACA015668	1	-1	1	21	554	574	UCGGACCAGGCUUCAUUCCCC	::.:::::::::::::::.	CUGGGAUGAAGCCUGGUCCGG	Cleavage	locus=Chr08:11066706:11074546:-	1
osa-miR166j-3p	DACA015342	1	-1	1	21	569	589	UCGGACCAGGCUUCAUUCCCC	::.:::::::::::::::.	CCGGGAUGAAGCCUGGUCCGG	Cleavage	locus=Chr07:24317952:24325668:-	1
osa-miR166j-3p	DACA002429	1	-1	1	21	569	589	UCGGACCAGGCUUCAUUCCCC	::.:::::::::::::::.	CCGGGAUGAAGCCUGGUCCGG	Cleavage	locus=Chr11:16707398:16716252:-	1
osa-miR166j-3p	DACA022171	1	-1	1	21	539	559	UCGGACCAGGCUUCAUUCCCC	::.:::::::::::::::.	UUGGGAUGAAGCCUGGUCCGG	Cleavage	locus=Chr02:2486221:2491454:+	1
osa-miR166j-3p	DACA002672	1	-1	1	21	554	574	UCGGACCAGGCUUCAUUCCCC	::.:::::::::::::::.	CUGGGAUGAAGCCUGGUCCGG	Cleavage	locus=Chr07:12662273:12669644:-	1
osa-miR166m	DACA002672	1	-1	1	21	554	574	UCGGACCAGGCUUCAUUCCCU	::.:::::::::::::::.	CUGGGAUGAAGCCUGGUCCGG	Cleavage	locus=Chr07:12662273:12669644:-	1
osa-miR166m	DACA022171	1	-1	1	21	539	559	UCGGACCAGGCUUCAUUCCCU	::.:::::::::::::::.	UUGGGAUGAAGCCUGGUCCGG	Cleavage	locus=Chr02:2486221:2491454:+	1
osa-miR166m	DACA015668	1	-1	1	21	554	574	UCGGACCAGGCUUCAUUCCCU	::.:::::::::::::::.	CUGGGAUGAAGCCUGGUCCGG	Cleavage	locus=Chr08:11066706:11074546:-	1
osa-miR166m	DACA015342	1	-1	1	21	569	589	UCGGACCAGGCUUCAUUCCCU	::.:::::::::::::::.	CCGGGAUGAAGCCUGGUCCGG	Cleavage	locus=Chr07:24317952:24325668:-	1
osa-miR166m	DACA002429	1	-1	1	21	569	589	UCGGACCAGGCUUCAUUCCCU	::.:::::::::::::::.	CCGGGAUGAAGCCUGGUCCGG	Cleavage	locus=Chr11:16707398:16716252:-	1
pab-miR166a	DACA002429	1	-1	1	21	569	589	UCGGACCAGGCUUCAUUCCUC	::.:::::::::::::::.	CCGGGAUGAAGCCUGGUCCGG	Cleavage	locus=Chr11:16707398:16716252:-	1
pab-miR166a	DACA002672	1	-1	1	21	554	574	UCGGACCAGGCUUCAUUCCUC	::.:::::::::::::::.	CUGGGAUGAAGCCUGGUCCGG	Cleavage	locus=Chr07:12662273:12669644:-	1
pab-miR166a	DACA022171	1	-1	1	21	539	559	UCGGACCAGGCUUCAUUCCUC	::.:::::::::::::::.	UUGGGAUGAAGCCUGGUCCGG	Cleavage	locus=Chr02:2486221:2491454:+	1
pab-miR166a	DACA015668	1	-1	1	21	554	574	UCGGACCAGGCUUCAUUCCUC	::.:::::::::::::::.	CUGGGAUGAAGCCUGGUCCGG	Cleavage	locus=Chr08:11066706:11074546:-	1
pab-miR166a	DACA015342	1	-1	1	21	569	589	UCGGACCAGGCUUCAUUCCUC	::.:::::::::::::::.	CCGGGAUGAAGCCUGGUCCGG	Cleavage	locus=Chr07:24317952:24325668:-	1
pab-miR166b	DACA015668	1	-1	1	21	554	574	UCGGACCAGGCUUCAUUCCUU	::.:::::::::::::::.	CUGGGAUGAAGCCUGGUCCGG	Cleavage	locus=Chr08:11066706:11074546:-	1
pab-miR166b	DACA015342	1	-1	1	21	569	589	UCGGACCAGGCUUCAUUCCUU	::.:::::::::::::::.	CCGGGAUGAAGCCUGGUCCGG	Cleavage	locus=Chr07:24317952:24325668:-	1
pab-miR166b	DACA002429	1	-1	1	21	569	589	UCGGACCAGGCUUCAUUCCUU	::.:::::::::::::::.	CCGGGAUGAAGCCUGGUCCGG	Cleavage	locus=Chr11:16707398:16716252:-	1
pab-miR166b	DACA002672	1	-1	1	21	554	574	UCGGACCAGGCUUCAUUCCUU	::.:::::::::::::::.	CUGGGAUGAAGCCUGGUCCGG	Cleavage	locus=Chr07:12662273:12669644:-	1
pab-miR166b	DACA022171	1	-1	1	21	539	559	UCGGACCAGGCUUCAUUCCUU	::.:::::::::::::::.	UUGGGAUGAAGCCUGGUCCGG	Cleavage	locus=Chr02:2486221:2491454:+	1
pde-miR166a	DACA002672	1	-1	1	19	556	574	UCGGACCAGGCUUCAUUCC	::.:::::::::::::::.	GGGAUGAAGCCUGGUCCGG	Cleavage	locus=Chr07:12662273:12669644:-	1
pde-miR166a	DACA015668	1	-1	1	19	556	574	UCGGACCAGGCUUCAUUCC	::.:::::::::::::::.	GGGAUGAAGCCUGGUCCGG	Cleavage	locus=Chr08:11066706:11074546:-	1
pde-miR166a	DACA002429	1	-1	1	19	571	589	UCGGACCAGGCUUCAUUCC	::.:::::::::::::::.	GGGAUGAAGCCUGGUCCGG	Cleavage	locus=Chr11:16707398:16716252:-	1
pde-miR166a	DACA015342	1	-1	1	19	571	589	UCGGACCAGGCUUCAUUCC	::.:::::::::::::::.	GGGAUGAAGCCUGGUCCGG	Cleavage	locus=Chr07:24317952:24325668:-	1
pde-miR166a	DACA022171	1	-1	1	19	541	559	UCGGACCAGGCUUCAUUCC	::.:::::::::::::::.	GGGAUGAAGCCUGGUCCGG	Cleavage	locus=Chr02:2486221:2491454:+	1
pde-miR166b	DACA002672	1	-1	1	19	556	574	UCGGACCAGGCUUCAUUCC	::.:::::::::::::::.	GGGAUGAAGCCUGGUCCGG	Cleavage	locus=Chr07:12662273:12669644:-	1
pde-miR166b	DACA015668	1	-1	1	19	556	574	UCGGACCAGGCUUCAUUCC	::.:::::::::::::::.	GGGAUGAAGCCUGGUCCGG	Cleavage	locus=Chr08:11066706:11074546:-	1
pde-miR166b	DACA002429	1	-1	1	19	571	589	UCGGACCAGGCUUCAUUCC	::.:::::::::::::::.	GGGAUGAAGCCUGGUCCGG	Cleavage	locus=Chr11:16707398:16716252:-	1
pde-miR166b	DACA022171	1	-1	1	19	541	559	UCGGACCAGGCUUCAUUCC	::.:::::::::::::::.	GGGAUGAAGCCUGGUCCGG	Cleavage	locus=Chr02:2486221:2491454:+	1
pde-miR166b	DACA015342	1	-1	1	19	571	589	UCGGACCAGGCUUCAUUCC	::.:::::::::::::::.	GGGAUGAAGCCUGGUCCGG	Cleavage	locus=Chr07:24317952:24325668:-	1
ppt-miR166a	DACA002672	1	-1	1	21	554	574	UCGGACCAGGCUUCAUUCCCC	::.:::::::::::::::.	CUGGGAUGAAGCCUGGUCCGG	Cleavage	locus=Chr07:12662273:12669644:-	1
ppt-miR166a	DACA015668	1	-1	1	21	554	574	UCGGACCAGGCUUCAUUCCCC	::.:::::::::::::::.	CUGGGAUGAAGCCUGGUCCGG	Cleavage	locus=Chr08:11066706:11074546:-	1
ppt-miR166a	DACA015342	1	-1	1	21	569	589	UCGGACCAGGCUUCAUUCCCC	::.:::::::::::::::.	CCGGGAUGAAGCCUGGUCCGG	Cleavage	locus=Chr07:24317952:24325668:-	1
ppt-miR166a	DACA002429	1	-1	1	21	569	589	UCGGACCAGGCUUCAUUCCCC	::.:::::::::::::::.	CCGGGAUGAAGCCUGGUCCGG	Cleavage	locus=Chr11:16707398:16716252:-	1
ppt-miR166a	DACA022171	1	-1	1	21	539	559	UCGGACCAGGCUUCAUUCCCC	::.:::::::::::::::.	UUGGGAUGAAGCCUGGUCCGG	Cleavage	locus=Chr02:2486221:2491454:+	1
ppt-miR166b	DACA015668	1	-1	1	21	554	574	UCGGACCAGGCUUCAUUCCCC	::.:::::::::::::::.	CUGGGAUGAAGCCUGGUCCGG	Cleavage	locus=Chr08:11066706:11074546:-	1
ppt-miR166b	DACA015342	1	-1	1	21	569	589	UCGGACCAGGCUUCAUUCCCC	::.:::::::::::::::.	CCGGGAUGAAGCCUGGUCCGG	Cleavage	locus=Chr07:24317952:24325668:-	1
ppt-miR166b	DACA002429	1	-1	1	21	569	589	UCGGACCAGGCUUCAUUCCCC	::.:::::::::::::::.	CCGGGAUGAAGCCUGGUCCGG	Cleavage	locus=Chr11:16707398:16716252:-	1
ppt-miR166b	DACA022171	1	-1	1	21	539	559	UCGGACCAGGCUUCAUUCCCC	::.:::::::::::::::.	UUGGGAUGAAGCCUGGUCCGG	Cleavage	locus=Chr02:2486221:2491454:+	1
ppt-miR166b	DACA002672	1	-1	1	21	554	574	UCGGACCAGGCUUCAUUCCCC	::.:::::::::::::::.	CUGGGAUGAAGCCUGGUCCGG	Cleavage	locus=Chr07:12662273:12669644:-	1
ppt-miR166c	DACA015668	1	-1	1	21	554	574	UCGGACCAGGCUUCAUUCCCC	::.:::::::::::::::.	CUGGGAUGAAGCCUGGUCCGG	Cleavage	locus=Chr08:11066706:11074546:-	1
ppt-miR166c	DACA015342	1	-1	1	21	569	589	UCGGACCAGGCUUCAUUCCCC	::.:::::::::::::::.	CCGGGAUGAAGCCUGGUCCGG	Cleavage	locus=Chr07:24317952:24325668:-	1
ppt-miR166c	DACA002429	1	-1	1	21	569	589	UCGGACCAGGCUUCAUUCCCC	::.:::::::::::::::.	CCGGGAUGAAGCCUGGUCCGG	Cleavage	locus=Chr11:16707398:16716252:-	1
ppt-miR166c	DACA022171	1	-1	1	21	539	559	UCGGACCAGGCUUCAUUCCCC	::.:::::::::::::::.	UUGGGAUGAAGCCUGGUCCGG	Cleavage	locus=Chr02:2486221:2491454:+	1
ppt-miR166c	DACA002672	1	-1	1	21	554	574	UCGGACCAGGCUUCAUUCCCC	::.:::::::::::::::.	CUGGGAUGAAGCCUGGUCCGG	Cleavage	locus=Chr07:12662273:12669644:-	1
ppt-miR166d	DACA002429	1	-1	1	21	569	589	UCGGACCAGGCUUCAUUCCCC	::.:::::::::::::::.	CCGGGAUGAAGCCUGGUCCGG	Cleavage	locus=Chr11:16707398:16716252:-	1
ppt-miR166d	DACA022171	1	-1	1	21	539	559	UCGGACCAGGCUUCAUUCCCC	::.:::::::::::::::.	UUGGGAUGAAGCCUGGUCCGG	Cleavage	locus=Chr02:2486221:2491454:+	1
ppt-miR166d	DACA002672	1	-1	1	21	554	574	UCGGACCAGGCUUCAUUCCCC	::.:::::::::::::::.	CUGGGAUGAAGCCUGGUCCGG	Cleavage	locus=Chr07:12662273:12669644:-	1
ppt-miR166d	DACA015668	1	-1	1	21	554	574	UCGGACCAGGCUUCAUUCCCC	::.:::::::::::::::.	CUGGGAUGAAGCCUGGUCCGG	Cleavage	locus=Chr08:11066706:11074546:-	1
ppt-miR166d	DACA015342	1	-1	1	21	569	589	UCGGACCAGGCUUCAUUCCCC	::.:::::::::::::::.	CCGGGAUGAAGCCUGGUCCGG	Cleavage	locus=Chr07:24317952:24325668:-	1
ppt-miR166e	DACA002672	1	-1	1	21	554	574	UCGGACCAGGCUUCAUUCCCC	::.:::::::::::::::.	CUGGGAUGAAGCCUGGUCCGG	Cleavage	locus=Chr07:12662273:12669644:-	1
ppt-miR166e	DACA015668	1	-1	1	21	554	574	UCGGACCAGGCUUCAUUCCCC	::.:::::::::::::::.	CUGGGAUGAAGCCUGGUCCGG	Cleavage	locus=Chr08:11066706:11074546:-	1
ppt-miR166e	DACA015342	1	-1	1	21	569	589	UCGGACCAGGCUUCAUUCCCC	::.:::::::::::::::.	CCGGGAUGAAGCCUGGUCCGG	Cleavage	locus=Chr07:24317952:24325668:-	1
ppt-miR166e	DACA002429	1	-1	1	21	569	589	UCGGACCAGGCUUCAUUCCCC	::.:::::::::::::::.	CCGGGAUGAAGCCUGGUCCGG	Cleavage	locus=Chr11:16707398:16716252:-	1
ppt-miR166e	DACA022171	1	-1	1	21	539	559	UCGGACCAGGCUUCAUUCCCC	::.:::::::::::::::.	UUGGGAUGAAGCCUGGUCCGG	Cleavage	locus=Chr02:2486221:2491454:+	1
ppt-miR166f	DACA022171	1	-1	1	21	539	559	UCGGACCAGGCUUCAUUCCCC	::.:::::::::::::::.	UUGGGAUGAAGCCUGGUCCGG	Cleavage	locus=Chr02:2486221:2491454:+	1
ppt-miR166f	DACA002672	1	-1	1	21	554	574	UCGGACCAGGCUUCAUUCCCC	::.:::::::::::::::.	CUGGGAUGAAGCCUGGUCCGG	Cleavage	locus=Chr07:12662273:12669644:-	1
ppt-miR166f	DACA015668	1	-1	1	21	554	574	UCGGACCAGGCUUCAUUCCCC	::.:::::::::::::::.	CUGGGAUGAAGCCUGGUCCGG	Cleavage	locus=Chr08:11066706:11074546:-	1
ppt-miR166f	DACA015342	1	-1	1	21	569	589	UCGGACCAGGCUUCAUUCCCC	::.:::::::::::::::.	CCGGGAUGAAGCCUGGUCCGG	Cleavage	locus=Chr07:24317952:24325668:-	1
ppt-miR166f	DACA002429	1	-1	1	21	569	589	UCGGACCAGGCUUCAUUCCCC	::.:::::::::::::::.	CCGGGAUGAAGCCUGGUCCGG	Cleavage	locus=Chr11:16707398:16716252:-	1
ppt-miR166g	DACA015668	1	-1	1	21	554	574	UCGGACCAGGCUUCAUUCCCC	::.:::::::::::::::.	CUGGGAUGAAGCCUGGUCCGG	Cleavage	locus=Chr08:11066706:11074546:-	1
ppt-miR166g	DACA002672	1	-1	1	21	554	574	UCGGACCAGGCUUCAUUCCCC	::.:::::::::::::::.	CUGGGAUGAAGCCUGGUCCGG	Cleavage	locus=Chr07:12662273:12669644:-	1
ppt-miR166g	DACA015342	1	-1	1	21	569	589	UCGGACCAGGCUUCAUUCCCC	::.:::::::::::::::.	CCGGGAUGAAGCCUGGUCCGG	Cleavage	locus=Chr07:24317952:24325668:-	1
ppt-miR166g	DACA002429	1	-1	1	21	569	589	UCGGACCAGGCUUCAUUCCCC	::.:::::::::::::::.	CCGGGAUGAAGCCUGGUCCGG	Cleavage	locus=Chr11:16707398:16716252:-	1
ppt-miR166g	DACA022171	1	-1	1	21	539	559	UCGGACCAGGCUUCAUUCCCC	::.:::::::::::::::.	UUGGGAUGAAGCCUGGUCCGG	Cleavage	locus=Chr02:2486221:2491454:+	1
ppt-miR166h	DACA015342	1	-1	1	21	569	589	UCGGACCAGGCUUCAUUCCCC	::.:::::::::::::::.	CCGGGAUGAAGCCUGGUCCGG	Cleavage	locus=Chr07:24317952:24325668:-	1
ppt-miR166h	DACA002429	1	-1	1	21	569	589	UCGGACCAGGCUUCAUUCCCC	::.:::::::::::::::.	CCGGGAUGAAGCCUGGUCCGG	Cleavage	locus=Chr11:16707398:16716252:-	1
ppt-miR166h	DACA022171	1	-1	1	21	539	559	UCGGACCAGGCUUCAUUCCCC	::.:::::::::::::::.	UUGGGAUGAAGCCUGGUCCGG	Cleavage	locus=Chr02:2486221:2491454:+	1
ppt-miR166h	DACA015668	1	-1	1	21	554	574	UCGGACCAGGCUUCAUUCCCC	::.:::::::::::::::.	CUGGGAUGAAGCCUGGUCCGG	Cleavage	locus=Chr08:11066706:11074546:-	1
ppt-miR166h	DACA002672	1	-1	1	21	554	574	UCGGACCAGGCUUCAUUCCCC	::.:::::::::::::::.	CUGGGAUGAAGCCUGGUCCGG	Cleavage	locus=Chr07:12662273:12669644:-	1
ppt-miR166i	DACA015342	1	-1	1	21	569	589	UCGGACCAGGCUUCAUUCCCC	::.:::::::::::::::.	CCGGGAUGAAGCCUGGUCCGG	Cleavage	locus=Chr07:24317952:24325668:-	1
ppt-miR166i	DACA002429	1	-1	1	21	569	589	UCGGACCAGGCUUCAUUCCCC	::.:::::::::::::::.	CCGGGAUGAAGCCUGGUCCGG	Cleavage	locus=Chr11:16707398:16716252:-	1
ppt-miR166i	DACA022171	1	-1	1	21	539	559	UCGGACCAGGCUUCAUUCCCC	::.:::::::::::::::.	UUGGGAUGAAGCCUGGUCCGG	Cleavage	locus=Chr02:2486221:2491454:+	1
ppt-miR166i	DACA002672	1	-1	1	21	554	574	UCGGACCAGGCUUCAUUCCCC	::.:::::::::::::::.	CUGGGAUGAAGCCUGGUCCGG	Cleavage	locus=Chr07:12662273:12669644:-	1
ppt-miR166i	DACA015668	1	-1	1	21	554	574	UCGGACCAGGCUUCAUUCCCC	::.:::::::::::::::.	CUGGGAUGAAGCCUGGUCCGG	Cleavage	locus=Chr08:11066706:11074546:-	1
pta-miR166a	DACA015342	1	-1	1	21	569	589	UCGGACCAGGCUUCAUUCCCC	::.:::::::::::::::.	CCGGGAUGAAGCCUGGUCCGG	Cleavage	locus=Chr07:24317952:24325668:-	1
pta-miR166a	DACA002429	1	-1	1	21	569	589	UCGGACCAGGCUUCAUUCCCC	::.:::::::::::::::.	CCGGGAUGAAGCCUGGUCCGG	Cleavage	locus=Chr11:16707398:16716252:-	1
pta-miR166a	DACA022171	1	-1	1	21	539	559	UCGGACCAGGCUUCAUUCCCC	::.:::::::::::::::.	UUGGGAUGAAGCCUGGUCCGG	Cleavage	locus=Chr02:2486221:2491454:+	1
pta-miR166a	DACA015668	1	-1	1	21	554	574	UCGGACCAGGCUUCAUUCCCC	::.:::::::::::::::.	CUGGGAUGAAGCCUGGUCCGG	Cleavage	locus=Chr08:11066706:11074546:-	1
pta-miR166a	DACA002672	1	-1	1	21	554	574	UCGGACCAGGCUUCAUUCCCC	::.:::::::::::::::.	CUGGGAUGAAGCCUGGUCCGG	Cleavage	locus=Chr07:12662273:12669644:-	1
pta-miR166b	DACA015668	1	-1	1	21	554	574	UCGGACCAGGCUUCAUUCCCC	::.:::::::::::::::.	CUGGGAUGAAGCCUGGUCCGG	Cleavage	locus=Chr08:11066706:11074546:-	1
pta-miR166b	DACA015342	1	-1	1	21	569	589	UCGGACCAGGCUUCAUUCCCC	::.:::::::::::::::.	CCGGGAUGAAGCCUGGUCCGG	Cleavage	locus=Chr07:24317952:24325668:-	1
pta-miR166b	DACA002429	1	-1	1	21	569	589	UCGGACCAGGCUUCAUUCCCC	::.:::::::::::::::.	CCGGGAUGAAGCCUGGUCCGG	Cleavage	locus=Chr11:16707398:16716252:-	1
pta-miR166b	DACA022171	1	-1	1	21	539	559	UCGGACCAGGCUUCAUUCCCC	::.:::::::::::::::.	UUGGGAUGAAGCCUGGUCCGG	Cleavage	locus=Chr02:2486221:2491454:+	1
pta-miR166b	DACA002672	1	-1	1	21	554	574	UCGGACCAGGCUUCAUUCCCC	::.:::::::::::::::.	CUGGGAUGAAGCCUGGUCCGG	Cleavage	locus=Chr07:12662273:12669644:-	1
ptc-miR166a	DACA015668	1	-1	1	21	554	574	UCGGACCAGGCUUCAUUCCCC	::.:::::::::::::::.	CUGGGAUGAAGCCUGGUCCGG	Cleavage	locus=Chr08:11066706:11074546:-	1
ptc-miR166a	DACA015342	1	-1	1	21	569	589	UCGGACCAGGCUUCAUUCCCC	::.:::::::::::::::.	CCGGGAUGAAGCCUGGUCCGG	Cleavage	locus=Chr07:24317952:24325668:-	1
ptc-miR166a	DACA002429	1	-1	1	21	569	589	UCGGACCAGGCUUCAUUCCCC	::.:::::::::::::::.	CCGGGAUGAAGCCUGGUCCGG	Cleavage	locus=Chr11:16707398:16716252:-	1
ptc-miR166a	DACA002672	1	-1	1	21	554	574	UCGGACCAGGCUUCAUUCCCC	::.:::::::::::::::.	CUGGGAUGAAGCCUGGUCCGG	Cleavage	locus=Chr07:12662273:12669644:-	1
ptc-miR166a	DACA022171	1	-1	1	21	539	559	UCGGACCAGGCUUCAUUCCCC	::.:::::::::::::::.	UUGGGAUGAAGCCUGGUCCGG	Cleavage	locus=Chr02:2486221:2491454:+	1
ptc-miR166b	DACA002672	1	-1	1	21	554	574	UCGGACCAGGCUUCAUUCCCC	::.:::::::::::::::.	CUGGGAUGAAGCCUGGUCCGG	Cleavage	locus=Chr07:12662273:12669644:-	1
ptc-miR166b	DACA015342	1	-1	1	21	569	589	UCGGACCAGGCUUCAUUCCCC	::.:::::::::::::::.	CCGGGAUGAAGCCUGGUCCGG	Cleavage	locus=Chr07:24317952:24325668:-	1
ptc-miR166b	DACA002429	1	-1	1	21	569	589	UCGGACCAGGCUUCAUUCCCC	::.:::::::::::::::.	CCGGGAUGAAGCCUGGUCCGG	Cleavage	locus=Chr11:16707398:16716252:-	1
ptc-miR166b	DACA022171	1	-1	1	21	539	559	UCGGACCAGGCUUCAUUCCCC	::.:::::::::::::::.	UUGGGAUGAAGCCUGGUCCGG	Cleavage	locus=Chr02:2486221:2491454:+	1
ptc-miR166b	DACA015668	1	-1	1	21	554	574	UCGGACCAGGCUUCAUUCCCC	::.:::::::::::::::.	CUGGGAUGAAGCCUGGUCCGG	Cleavage	locus=Chr08:11066706:11074546:-	1
ptc-miR166c	DACA015668	1	-1	1	21	554	574	UCGGACCAGGCUUCAUUCCCC	::.:::::::::::::::.	CUGGGAUGAAGCCUGGUCCGG	Cleavage	locus=Chr08:11066706:11074546:-	1
ptc-miR166c	DACA015342	1	-1	1	21	569	589	UCGGACCAGGCUUCAUUCCCC	::.:::::::::::::::.	CCGGGAUGAAGCCUGGUCCGG	Cleavage	locus=Chr07:24317952:24325668:-	1
ptc-miR166c	DACA002429	1	-1	1	21	569	589	UCGGACCAGGCUUCAUUCCCC	::.:::::::::::::::.	CCGGGAUGAAGCCUGGUCCGG	Cleavage	locus=Chr11:16707398:16716252:-	1
ptc-miR166c	DACA022171	1	-1	1	21	539	559	UCGGACCAGGCUUCAUUCCCC	::.:::::::::::::::.	UUGGGAUGAAGCCUGGUCCGG	Cleavage	locus=Chr02:2486221:2491454:+	1
ptc-miR166c	DACA002672	1	-1	1	21	554	574	UCGGACCAGGCUUCAUUCCCC	::.:::::::::::::::.	CUGGGAUGAAGCCUGGUCCGG	Cleavage	locus=Chr07:12662273:12669644:-	1
ptc-miR166d	DACA022171	1	-1	1	21	539	559	UCGGACCAGGCUUCAUUCCCC	::.:::::::::::::::.	UUGGGAUGAAGCCUGGUCCGG	Cleavage	locus=Chr02:2486221:2491454:+	1
ptc-miR166d	DACA015668	1	-1	1	21	554	574	UCGGACCAGGCUUCAUUCCCC	::.:::::::::::::::.	CUGGGAUGAAGCCUGGUCCGG	Cleavage	locus=Chr08:11066706:11074546:-	1
ptc-miR166d	DACA015342	1	-1	1	21	569	589	UCGGACCAGGCUUCAUUCCCC	::.:::::::::::::::.	CCGGGAUGAAGCCUGGUCCGG	Cleavage	locus=Chr07:24317952:24325668:-	1
ptc-miR166d	DACA002429	1	-1	1	21	569	589	UCGGACCAGGCUUCAUUCCCC	::.:::::::::::::::.	CCGGGAUGAAGCCUGGUCCGG	Cleavage	locus=Chr11:16707398:16716252:-	1
ptc-miR166d	DACA002672	1	-1	1	21	554	574	UCGGACCAGGCUUCAUUCCCC	::.:::::::::::::::.	CUGGGAUGAAGCCUGGUCCGG	Cleavage	locus=Chr07:12662273:12669644:-	1
ptc-miR166e	DACA015668	1	-1	1	21	554	574	UCGGACCAGGCUUCAUUCCCC	::.:::::::::::::::.	CUGGGAUGAAGCCUGGUCCGG	Cleavage	locus=Chr08:11066706:11074546:-	1
ptc-miR166e	DACA015342	1	-1	1	21	569	589	UCGGACCAGGCUUCAUUCCCC	::.:::::::::::::::.	CCGGGAUGAAGCCUGGUCCGG	Cleavage	locus=Chr07:24317952:24325668:-	1
ptc-miR166e	DACA002429	1	-1	1	21	569	589	UCGGACCAGGCUUCAUUCCCC	::.:::::::::::::::.	CCGGGAUGAAGCCUGGUCCGG	Cleavage	locus=Chr11:16707398:16716252:-	1
ptc-miR166e	DACA022171	1	-1	1	21	539	559	UCGGACCAGGCUUCAUUCCCC	::.:::::::::::::::.	UUGGGAUGAAGCCUGGUCCGG	Cleavage	locus=Chr02:2486221:2491454:+	1
ptc-miR166e	DACA002672	1	-1	1	21	554	574	UCGGACCAGGCUUCAUUCCCC	::.:::::::::::::::.	CUGGGAUGAAGCCUGGUCCGG	Cleavage	locus=Chr07:12662273:12669644:-	1
ptc-miR166f	DACA015668	1	-1	1	21	554	574	UCGGACCAGGCUUCAUUCCCC	::.:::::::::::::::.	CUGGGAUGAAGCCUGGUCCGG	Cleavage	locus=Chr08:11066706:11074546:-	1
ptc-miR166f	DACA015342	1	-1	1	21	569	589	UCGGACCAGGCUUCAUUCCCC	::.:::::::::::::::.	CCGGGAUGAAGCCUGGUCCGG	Cleavage	locus=Chr07:24317952:24325668:-	1
ptc-miR166f	DACA002429	1	-1	1	21	569	589	UCGGACCAGGCUUCAUUCCCC	::.:::::::::::::::.	CCGGGAUGAAGCCUGGUCCGG	Cleavage	locus=Chr11:16707398:16716252:-	1
ptc-miR166f	DACA022171	1	-1	1	21	539	559	UCGGACCAGGCUUCAUUCCCC	::.:::::::::::::::.	UUGGGAUGAAGCCUGGUCCGG	Cleavage	locus=Chr02:2486221:2491454:+	1
ptc-miR166f	DACA002672	1	-1	1	21	554	574	UCGGACCAGGCUUCAUUCCCC	::.:::::::::::::::.	CUGGGAUGAAGCCUGGUCCGG	Cleavage	locus=Chr07:12662273:12669644:-	1
ptc-miR166g	DACA002429	1	-1	1	21	569	589	UCGGACCAGGCUUCAUUCCCC	::.:::::::::::::::.	CCGGGAUGAAGCCUGGUCCGG	Cleavage	locus=Chr11:16707398:16716252:-	1
ptc-miR166g	DACA022171	1	-1	1	21	539	559	UCGGACCAGGCUUCAUUCCCC	::.:::::::::::::::.	UUGGGAUGAAGCCUGGUCCGG	Cleavage	locus=Chr02:2486221:2491454:+	1
ptc-miR166g	DACA002672	1	-1	1	21	554	574	UCGGACCAGGCUUCAUUCCCC	::.:::::::::::::::.	CUGGGAUGAAGCCUGGUCCGG	Cleavage	locus=Chr07:12662273:12669644:-	1
ptc-miR166g	DACA015668	1	-1	1	21	554	574	UCGGACCAGGCUUCAUUCCCC	::.:::::::::::::::.	CUGGGAUGAAGCCUGGUCCGG	Cleavage	locus=Chr08:11066706:11074546:-	1
ptc-miR166g	DACA015342	1	-1	1	21	569	589	UCGGACCAGGCUUCAUUCCCC	::.:::::::::::::::.	CCGGGAUGAAGCCUGGUCCGG	Cleavage	locus=Chr07:24317952:24325668:-	1
ptc-miR166h	DACA022171	1	-1	1	21	539	559	UCGGACCAGGCUUCAUUCCCC	::.:::::::::::::::.	UUGGGAUGAAGCCUGGUCCGG	Cleavage	locus=Chr02:2486221:2491454:+	1
ptc-miR166h	DACA002429	1	-1	1	21	569	589	UCGGACCAGGCUUCAUUCCCC	::.:::::::::::::::.	CCGGGAUGAAGCCUGGUCCGG	Cleavage	locus=Chr11:16707398:16716252:-	1
ptc-miR166h	DACA002672	1	-1	1	21	554	574	UCGGACCAGGCUUCAUUCCCC	::.:::::::::::::::.	CUGGGAUGAAGCCUGGUCCGG	Cleavage	locus=Chr07:12662273:12669644:-	1
ptc-miR166h	DACA015668	1	-1	1	21	554	574	UCGGACCAGGCUUCAUUCCCC	::.:::::::::::::::.	CUGGGAUGAAGCCUGGUCCGG	Cleavage	locus=Chr08:11066706:11074546:-	1
ptc-miR166h	DACA015342	1	-1	1	21	569	589	UCGGACCAGGCUUCAUUCCCC	::.:::::::::::::::.	CCGGGAUGAAGCCUGGUCCGG	Cleavage	locus=Chr07:24317952:24325668:-	1
ptc-miR166i	DACA015668	1	-1	1	21	554	574	UCGGACCAGGCUUCAUUCCCC	::.:::::::::::::::.	CUGGGAUGAAGCCUGGUCCGG	Cleavage	locus=Chr08:11066706:11074546:-	1
ptc-miR166i	DACA015342	1	-1	1	21	569	589	UCGGACCAGGCUUCAUUCCCC	::.:::::::::::::::.	CCGGGAUGAAGCCUGGUCCGG	Cleavage	locus=Chr07:24317952:24325668:-	1
ptc-miR166i	DACA002429	1	-1	1	21	569	589	UCGGACCAGGCUUCAUUCCCC	::.:::::::::::::::.	CCGGGAUGAAGCCUGGUCCGG	Cleavage	locus=Chr11:16707398:16716252:-	1
ptc-miR166i	DACA022171	1	-1	1	21	539	559	UCGGACCAGGCUUCAUUCCCC	::.:::::::::::::::.	UUGGGAUGAAGCCUGGUCCGG	Cleavage	locus=Chr02:2486221:2491454:+	1
ptc-miR166i	DACA002672	1	-1	1	21	554	574	UCGGACCAGGCUUCAUUCCCC	::.:::::::::::::::.	CUGGGAUGAAGCCUGGUCCGG	Cleavage	locus=Chr07:12662273:12669644:-	1
ptc-miR166j	DACA015668	1	-1	1	21	554	574	UCGGACCAGGCUUCAUUCCCC	::.:::::::::::::::.	CUGGGAUGAAGCCUGGUCCGG	Cleavage	locus=Chr08:11066706:11074546:-	1
ptc-miR166j	DACA015342	1	-1	1	21	569	589	UCGGACCAGGCUUCAUUCCCC	::.:::::::::::::::.	CCGGGAUGAAGCCUGGUCCGG	Cleavage	locus=Chr07:24317952:24325668:-	1
ptc-miR166j	DACA002429	1	-1	1	21	569	589	UCGGACCAGGCUUCAUUCCCC	::.:::::::::::::::.	CCGGGAUGAAGCCUGGUCCGG	Cleavage	locus=Chr11:16707398:16716252:-	1
ptc-miR166j	DACA002672	1	-1	1	21	554	574	UCGGACCAGGCUUCAUUCCCC	::.:::::::::::::::.	CUGGGAUGAAGCCUGGUCCGG	Cleavage	locus=Chr07:12662273:12669644:-	1
ptc-miR166j	DACA022171	1	-1	1	21	539	559	UCGGACCAGGCUUCAUUCCCC	::.:::::::::::::::.	UUGGGAUGAAGCCUGGUCCGG	Cleavage	locus=Chr02:2486221:2491454:+	1
ptc-miR166k	DACA022171	1	-1	1	21	539	559	UCGGACCAGGCUUCAUUCCCC	::.:::::::::::::::.	UUGGGAUGAAGCCUGGUCCGG	Cleavage	locus=Chr02:2486221:2491454:+	1
ptc-miR166k	DACA015342	1	-1	1	21	569	589	UCGGACCAGGCUUCAUUCCCC	::.:::::::::::::::.	CCGGGAUGAAGCCUGGUCCGG	Cleavage	locus=Chr07:24317952:24325668:-	1
ptc-miR166k	DACA002429	1	-1	1	21	569	589	UCGGACCAGGCUUCAUUCCCC	::.:::::::::::::::.	CCGGGAUGAAGCCUGGUCCGG	Cleavage	locus=Chr11:16707398:16716252:-	1
ptc-miR166k	DACA002672	1	-1	1	21	554	574	UCGGACCAGGCUUCAUUCCCC	::.:::::::::::::::.	CUGGGAUGAAGCCUGGUCCGG	Cleavage	locus=Chr07:12662273:12669644:-	1
ptc-miR166k	DACA015668	1	-1	1	21	554	574	UCGGACCAGGCUUCAUUCCCC	::.:::::::::::::::.	CUGGGAUGAAGCCUGGUCCGG	Cleavage	locus=Chr08:11066706:11074546:-	1
ptc-miR166l	DACA022171	1	-1	1	21	539	559	UCGGACCAGGCUUCAUUCCCC	::.:::::::::::::::.	UUGGGAUGAAGCCUGGUCCGG	Cleavage	locus=Chr02:2486221:2491454:+	1
ptc-miR166l	DACA002429	1	-1	1	21	569	589	UCGGACCAGGCUUCAUUCCCC	::.:::::::::::::::.	CCGGGAUGAAGCCUGGUCCGG	Cleavage	locus=Chr11:16707398:16716252:-	1
ptc-miR166l	DACA002672	1	-1	1	21	554	574	UCGGACCAGGCUUCAUUCCCC	::.:::::::::::::::.	CUGGGAUGAAGCCUGGUCCGG	Cleavage	locus=Chr07:12662273:12669644:-	1
ptc-miR166l	DACA015668	1	-1	1	21	554	574	UCGGACCAGGCUUCAUUCCCC	::.:::::::::::::::.	CUGGGAUGAAGCCUGGUCCGG	Cleavage	locus=Chr08:11066706:11074546:-	1
ptc-miR166l	DACA015342	1	-1	1	21	569	589	UCGGACCAGGCUUCAUUCCCC	::.:::::::::::::::.	CCGGGAUGAAGCCUGGUCCGG	Cleavage	locus=Chr07:24317952:24325668:-	1
ptc-miR166m	DACA002672	1	-1	1	21	554	574	UCGGACCAGGCUUCAUUCCCC	::.:::::::::::::::.	CUGGGAUGAAGCCUGGUCCGG	Cleavage	locus=Chr07:12662273:12669644:-	1
ptc-miR166m	DACA022171	1	-1	1	21	539	559	UCGGACCAGGCUUCAUUCCCC	::.:::::::::::::::.	UUGGGAUGAAGCCUGGUCCGG	Cleavage	locus=Chr02:2486221:2491454:+	1
ptc-miR166m	DACA015342	1	-1	1	21	569	589	UCGGACCAGGCUUCAUUCCCC	::.:::::::::::::::.	CCGGGAUGAAGCCUGGUCCGG	Cleavage	locus=Chr07:24317952:24325668:-	1
ptc-miR166m	DACA002429	1	-1	1	21	569	589	UCGGACCAGGCUUCAUUCCCC	::.:::::::::::::::.	CCGGGAUGAAGCCUGGUCCGG	Cleavage	locus=Chr11:16707398:16716252:-	1
ptc-miR166m	DACA015668	1	-1	1	21	554	574	UCGGACCAGGCUUCAUUCCCC	::.:::::::::::::::.	CUGGGAUGAAGCCUGGUCCGG	Cleavage	locus=Chr08:11066706:11074546:-	1
ptc-miR166n	DACA002429	1	-1	1	21	569	589	UCGGACCAGGCUUCAUUCCUU	::.:::::::::::::::.	CCGGGAUGAAGCCUGGUCCGG	Cleavage	locus=Chr11:16707398:16716252:-	1
ptc-miR166n	DACA022171	1	-1	1	21	539	559	UCGGACCAGGCUUCAUUCCUU	::.:::::::::::::::.	UUGGGAUGAAGCCUGGUCCGG	Cleavage	locus=Chr02:2486221:2491454:+	1
ptc-miR166n	DACA015668	1	-1	1	21	554	574	UCGGACCAGGCUUCAUUCCUU	::.:::::::::::::::.	CUGGGAUGAAGCCUGGUCCGG	Cleavage	locus=Chr08:11066706:11074546:-	1
ptc-miR166n	DACA015342	1	-1	1	21	569	589	UCGGACCAGGCUUCAUUCCUU	::.:::::::::::::::.	CCGGGAUGAAGCCUGGUCCGG	Cleavage	locus=Chr07:24317952:24325668:-	1
ptc-miR166n	DACA002672	1	-1	1	21	554	574	UCGGACCAGGCUUCAUUCCUU	::.:::::::::::::::.	CUGGGAUGAAGCCUGGUCCGG	Cleavage	locus=Chr07:12662273:12669644:-	1
ptc-miR166o	DACA015668	1	-1	1	21	554	574	UCGGACCAGGCUUCAUUCCUU	::.:::::::::::::::.	CUGGGAUGAAGCCUGGUCCGG	Cleavage	locus=Chr08:11066706:11074546:-	1
ptc-miR166o	DACA015342	1	-1	1	21	569	589	UCGGACCAGGCUUCAUUCCUU	::.:::::::::::::::.	CCGGGAUGAAGCCUGGUCCGG	Cleavage	locus=Chr07:24317952:24325668:-	1
ptc-miR166o	DACA002429	1	-1	1	21	569	589	UCGGACCAGGCUUCAUUCCUU	::.:::::::::::::::.	CCGGGAUGAAGCCUGGUCCGG	Cleavage	locus=Chr11:16707398:16716252:-	1
ptc-miR166o	DACA002672	1	-1	1	21	554	574	UCGGACCAGGCUUCAUUCCUU	::.:::::::::::::::.	CUGGGAUGAAGCCUGGUCCGG	Cleavage	locus=Chr07:12662273:12669644:-	1
ptc-miR166o	DACA022171	1	-1	1	21	539	559	UCGGACCAGGCUUCAUUCCUU	::.:::::::::::::::.	UUGGGAUGAAGCCUGGUCCGG	Cleavage	locus=Chr02:2486221:2491454:+	1
ptc-miR166q	DACA002429	1	-1	1	21	569	589	UCGGACCAGGCUUCAUUCCUU	::.:::::::::::::::.	CCGGGAUGAAGCCUGGUCCGG	Cleavage	locus=Chr11:16707398:16716252:-	1
ptc-miR166q	DACA022171	1	-1	1	21	539	559	UCGGACCAGGCUUCAUUCCUU	::.:::::::::::::::.	UUGGGAUGAAGCCUGGUCCGG	Cleavage	locus=Chr02:2486221:2491454:+	1
ptc-miR166q	DACA002672	1	-1	1	21	554	574	UCGGACCAGGCUUCAUUCCUU	::.:::::::::::::::.	CUGGGAUGAAGCCUGGUCCGG	Cleavage	locus=Chr07:12662273:12669644:-	1
ptc-miR166q	DACA015668	1	-1	1	21	554	574	UCGGACCAGGCUUCAUUCCUU	::.:::::::::::::::.	CUGGGAUGAAGCCUGGUCCGG	Cleavage	locus=Chr08:11066706:11074546:-	1
ptc-miR166q	DACA015342	1	-1	1	21	569	589	UCGGACCAGGCUUCAUUCCUU	::.:::::::::::::::.	CCGGGAUGAAGCCUGGUCCGG	Cleavage	locus=Chr07:24317952:24325668:-	1
pvu-miR166a	DACA022171	1	-1	1	21	539	559	UCGGACCAGGCUUCAUUCCCC	::.:::::::::::::::.	UUGGGAUGAAGCCUGGUCCGG	Cleavage	locus=Chr02:2486221:2491454:+	1
pvu-miR166a	DACA015342	1	-1	1	21	569	589	UCGGACCAGGCUUCAUUCCCC	::.:::::::::::::::.	CCGGGAUGAAGCCUGGUCCGG	Cleavage	locus=Chr07:24317952:24325668:-	1
pvu-miR166a	DACA002429	1	-1	1	21	569	589	UCGGACCAGGCUUCAUUCCCC	::.:::::::::::::::.	CCGGGAUGAAGCCUGGUCCGG	Cleavage	locus=Chr11:16707398:16716252:-	1
pvu-miR166a	DACA002672	1	-1	1	21	554	574	UCGGACCAGGCUUCAUUCCCC	::.:::::::::::::::.	CUGGGAUGAAGCCUGGUCCGG	Cleavage	locus=Chr07:12662273:12669644:-	1
pvu-miR166a	DACA015668	1	-1	1	21	554	574	UCGGACCAGGCUUCAUUCCCC	::.:::::::::::::::.	CUGGGAUGAAGCCUGGUCCGG	Cleavage	locus=Chr08:11066706:11074546:-	1
rco-miR166a	DACA015668	1	-1	1	21	554	574	UCGGACCAGGCUUCAUUCCCC	::.:::::::::::::::.	CUGGGAUGAAGCCUGGUCCGG	Cleavage	locus=Chr08:11066706:11074546:-	1
rco-miR166a	DACA015342	1	-1	1	21	569	589	UCGGACCAGGCUUCAUUCCCC	::.:::::::::::::::.	CCGGGAUGAAGCCUGGUCCGG	Cleavage	locus=Chr07:24317952:24325668:-	1
rco-miR166a	DACA002429	1	-1	1	21	569	589	UCGGACCAGGCUUCAUUCCCC	::.:::::::::::::::.	CCGGGAUGAAGCCUGGUCCGG	Cleavage	locus=Chr11:16707398:16716252:-	1
rco-miR166a	DACA002672	1	-1	1	21	554	574	UCGGACCAGGCUUCAUUCCCC	::.:::::::::::::::.	CUGGGAUGAAGCCUGGUCCGG	Cleavage	locus=Chr07:12662273:12669644:-	1
rco-miR166a	DACA022171	1	-1	1	21	539	559	UCGGACCAGGCUUCAUUCCCC	::.:::::::::::::::.	UUGGGAUGAAGCCUGGUCCGG	Cleavage	locus=Chr02:2486221:2491454:+	1
rco-miR166b	DACA015342	1	-1	1	21	569	589	UCGGACCAGGCUUCAUUCCCC	::.:::::::::::::::.	CCGGGAUGAAGCCUGGUCCGG	Cleavage	locus=Chr07:24317952:24325668:-	1
rco-miR166b	DACA002429	1	-1	1	21	569	589	UCGGACCAGGCUUCAUUCCCC	::.:::::::::::::::.	CCGGGAUGAAGCCUGGUCCGG	Cleavage	locus=Chr11:16707398:16716252:-	1
rco-miR166b	DACA022171	1	-1	1	21	539	559	UCGGACCAGGCUUCAUUCCCC	::.:::::::::::::::.	UUGGGAUGAAGCCUGGUCCGG	Cleavage	locus=Chr02:2486221:2491454:+	1
rco-miR166b	DACA002672	1	-1	1	21	554	574	UCGGACCAGGCUUCAUUCCCC	::.:::::::::::::::.	CUGGGAUGAAGCCUGGUCCGG	Cleavage	locus=Chr07:12662273:12669644:-	1
rco-miR166b	DACA015668	1	-1	1	21	554	574	UCGGACCAGGCUUCAUUCCCC	::.:::::::::::::::.	CUGGGAUGAAGCCUGGUCCGG	Cleavage	locus=Chr08:11066706:11074546:-	1
rco-miR166c	DACA015668	1	-1	1	21	554	574	UCGGACCAGGCUUCAUUCCCC	::.:::::::::::::::.	CUGGGAUGAAGCCUGGUCCGG	Cleavage	locus=Chr08:11066706:11074546:-	1
rco-miR166c	DACA015342	1	-1	1	21	569	589	UCGGACCAGGCUUCAUUCCCC	::.:::::::::::::::.	CCGGGAUGAAGCCUGGUCCGG	Cleavage	locus=Chr07:24317952:24325668:-	1
rco-miR166c	DACA002429	1	-1	1	21	569	589	UCGGACCAGGCUUCAUUCCCC	::.:::::::::::::::.	CCGGGAUGAAGCCUGGUCCGG	Cleavage	locus=Chr11:16707398:16716252:-	1
rco-miR166c	DACA022171	1	-1	1	21	539	559	UCGGACCAGGCUUCAUUCCCC	::.:::::::::::::::.	UUGGGAUGAAGCCUGGUCCGG	Cleavage	locus=Chr02:2486221:2491454:+	1
rco-miR166c	DACA002672	1	-1	1	21	554	574	UCGGACCAGGCUUCAUUCCCC	::.:::::::::::::::.	CUGGGAUGAAGCCUGGUCCGG	Cleavage	locus=Chr07:12662273:12669644:-	1
rco-miR166d	DACA002672	1	-1	1	21	554	574	UCGGACCAGGCUUCAUUCCCC	::.:::::::::::::::.	CUGGGAUGAAGCCUGGUCCGG	Cleavage	locus=Chr07:12662273:12669644:-	1
rco-miR166d	DACA022171	1	-1	1	21	539	559	UCGGACCAGGCUUCAUUCCCC	::.:::::::::::::::.	UUGGGAUGAAGCCUGGUCCGG	Cleavage	locus=Chr02:2486221:2491454:+	1
rco-miR166d	DACA015668	1	-1	1	21	554	574	UCGGACCAGGCUUCAUUCCCC	::.:::::::::::::::.	CUGGGAUGAAGCCUGGUCCGG	Cleavage	locus=Chr08:11066706:11074546:-	1
rco-miR166d	DACA015342	1	-1	1	21	569	589	UCGGACCAGGCUUCAUUCCCC	::.:::::::::::::::.	CCGGGAUGAAGCCUGGUCCGG	Cleavage	locus=Chr07:24317952:24325668:-	1
rco-miR166d	DACA002429	1	-1	1	21	569	589	UCGGACCAGGCUUCAUUCCCC	::.:::::::::::::::.	CCGGGAUGAAGCCUGGUCCGG	Cleavage	locus=Chr11:16707398:16716252:-	1
rco-miR166e	DACA015668	1	-1	1	21	554	574	UCGGACCAGGCUUCAUUCCCC	::.:::::::::::::::.	CUGGGAUGAAGCCUGGUCCGG	Cleavage	locus=Chr08:11066706:11074546:-	1
rco-miR166e	DACA015342	1	-1	1	21	569	589	UCGGACCAGGCUUCAUUCCCC	::.:::::::::::::::.	CCGGGAUGAAGCCUGGUCCGG	Cleavage	locus=Chr07:24317952:24325668:-	1
rco-miR166e	DACA002429	1	-1	1	21	569	589	UCGGACCAGGCUUCAUUCCCC	::.:::::::::::::::.	CCGGGAUGAAGCCUGGUCCGG	Cleavage	locus=Chr11:16707398:16716252:-	1
rco-miR166e	DACA002672	1	-1	1	21	554	574	UCGGACCAGGCUUCAUUCCCC	::.:::::::::::::::.	CUGGGAUGAAGCCUGGUCCGG	Cleavage	locus=Chr07:12662273:12669644:-	1
rco-miR166e	DACA022171	1	-1	1	21	539	559	UCGGACCAGGCUUCAUUCCCC	::.:::::::::::::::.	UUGGGAUGAAGCCUGGUCCGG	Cleavage	locus=Chr02:2486221:2491454:+	1
sbi-miR166a	DACA015668	1	-1	1	20	555	574	UCGGACCAGGCUUCAUUCCC	::.:::::::::::::::.	UGGGAUGAAGCCUGGUCCGG	Cleavage	locus=Chr08:11066706:11074546:-	1
sbi-miR166a	DACA015342	1	-1	1	20	570	589	UCGGACCAGGCUUCAUUCCC	::.:::::::::::::::.	CGGGAUGAAGCCUGGUCCGG	Cleavage	locus=Chr07:24317952:24325668:-	1
sbi-miR166a	DACA002429	1	-1	1	20	570	589	UCGGACCAGGCUUCAUUCCC	::.:::::::::::::::.	CGGGAUGAAGCCUGGUCCGG	Cleavage	locus=Chr11:16707398:16716252:-	1
sbi-miR166a	DACA022171	1	-1	1	20	540	559	UCGGACCAGGCUUCAUUCCC	::.:::::::::::::::.	UGGGAUGAAGCCUGGUCCGG	Cleavage	locus=Chr02:2486221:2491454:+	1
sbi-miR166a	DACA002672	1	-1	1	20	555	574	UCGGACCAGGCUUCAUUCCC	::.:::::::::::::::.	UGGGAUGAAGCCUGGUCCGG	Cleavage	locus=Chr07:12662273:12669644:-	1
sbi-miR166b	DACA002672	1	-1	1	20	555	574	UCGGACCAGGCUUCAUUCCC	::.:::::::::::::::.	UGGGAUGAAGCCUGGUCCGG	Cleavage	locus=Chr07:12662273:12669644:-	1
sbi-miR166b	DACA015668	1	-1	1	20	555	574	UCGGACCAGGCUUCAUUCCC	::.:::::::::::::::.	UGGGAUGAAGCCUGGUCCGG	Cleavage	locus=Chr08:11066706:11074546:-	1
sbi-miR166b	DACA002429	1	-1	1	20	570	589	UCGGACCAGGCUUCAUUCCC	::.:::::::::::::::.	CGGGAUGAAGCCUGGUCCGG	Cleavage	locus=Chr11:16707398:16716252:-	1
sbi-miR166b	DACA015342	1	-1	1	20	570	589	UCGGACCAGGCUUCAUUCCC	::.:::::::::::::::.	CGGGAUGAAGCCUGGUCCGG	Cleavage	locus=Chr07:24317952:24325668:-	1
sbi-miR166b	DACA022171	1	-1	1	20	540	559	UCGGACCAGGCUUCAUUCCC	::.:::::::::::::::.	UGGGAUGAAGCCUGGUCCGG	Cleavage	locus=Chr02:2486221:2491454:+	1
sbi-miR166c	DACA022171	1	-1	1	20	540	559	UCGGACCAGGCUUCAUUCCC	::.:::::::::::::::.	UGGGAUGAAGCCUGGUCCGG	Cleavage	locus=Chr02:2486221:2491454:+	1
sbi-miR166c	DACA002672	1	-1	1	20	555	574	UCGGACCAGGCUUCAUUCCC	::.:::::::::::::::.	UGGGAUGAAGCCUGGUCCGG	Cleavage	locus=Chr07:12662273:12669644:-	1
sbi-miR166c	DACA015668	1	-1	1	20	555	574	UCGGACCAGGCUUCAUUCCC	::.:::::::::::::::.	UGGGAUGAAGCCUGGUCCGG	Cleavage	locus=Chr08:11066706:11074546:-	1
sbi-miR166c	DACA015342	1	-1	1	20	570	589	UCGGACCAGGCUUCAUUCCC	::.:::::::::::::::.	CGGGAUGAAGCCUGGUCCGG	Cleavage	locus=Chr07:24317952:24325668:-	1
sbi-miR166c	DACA002429	1	-1	1	20	570	589	UCGGACCAGGCUUCAUUCCC	::.:::::::::::::::.	CGGGAUGAAGCCUGGUCCGG	Cleavage	locus=Chr11:16707398:16716252:-	1
sbi-miR166d	DACA015668	1	-1	1	20	555	574	UCGGACCAGGCUUCAUUCCC	::.:::::::::::::::.	UGGGAUGAAGCCUGGUCCGG	Cleavage	locus=Chr08:11066706:11074546:-	1
sbi-miR166d	DACA002672	1	-1	1	20	555	574	UCGGACCAGGCUUCAUUCCC	::.:::::::::::::::.	UGGGAUGAAGCCUGGUCCGG	Cleavage	locus=Chr07:12662273:12669644:-	1
sbi-miR166d	DACA015342	1	-1	1	20	570	589	UCGGACCAGGCUUCAUUCCC	::.:::::::::::::::.	CGGGAUGAAGCCUGGUCCGG	Cleavage	locus=Chr07:24317952:24325668:-	1
sbi-miR166d	DACA002429	1	-1	1	20	570	589	UCGGACCAGGCUUCAUUCCC	::.:::::::::::::::.	CGGGAUGAAGCCUGGUCCGG	Cleavage	locus=Chr11:16707398:16716252:-	1
sbi-miR166d	DACA022171	1	-1	1	20	540	559	UCGGACCAGGCUUCAUUCCC	::.:::::::::::::::.	UGGGAUGAAGCCUGGUCCGG	Cleavage	locus=Chr02:2486221:2491454:+	1
sbi-miR166f	DACA002672	1	-1	1	21	554	574	UCGGACCAGGCUUCAUUCCUC	::.:::::::::::::::.	CUGGGAUGAAGCCUGGUCCGG	Cleavage	locus=Chr07:12662273:12669644:-	1
sbi-miR166f	DACA022171	1	-1	1	21	539	559	UCGGACCAGGCUUCAUUCCUC	::.:::::::::::::::.	UUGGGAUGAAGCCUGGUCCGG	Cleavage	locus=Chr02:2486221:2491454:+	1
sbi-miR166f	DACA015342	1	-1	1	21	569	589	UCGGACCAGGCUUCAUUCCUC	::.:::::::::::::::.	CCGGGAUGAAGCCUGGUCCGG	Cleavage	locus=Chr07:24317952:24325668:-	1
sbi-miR166f	DACA002429	1	-1	1	21	569	589	UCGGACCAGGCUUCAUUCCUC	::.:::::::::::::::.	CCGGGAUGAAGCCUGGUCCGG	Cleavage	locus=Chr11:16707398:16716252:-	1
sbi-miR166f	DACA015668	1	-1	1	21	554	574	UCGGACCAGGCUUCAUUCCUC	::.:::::::::::::::.	CUGGGAUGAAGCCUGGUCCGG	Cleavage	locus=Chr08:11066706:11074546:-	1
sbi-miR166h	DACA022171	1	-1	1	20	540	559	UCGGACCAGGCUUCAUUCCC	::.:::::::::::::::.	UGGGAUGAAGCCUGGUCCGG	Cleavage	locus=Chr02:2486221:2491454:+	1
sbi-miR166h	DACA002672	1	-1	1	20	555	574	UCGGACCAGGCUUCAUUCCC	::.:::::::::::::::.	UGGGAUGAAGCCUGGUCCGG	Cleavage	locus=Chr07:12662273:12669644:-	1
sbi-miR166h	DACA015668	1	-1	1	20	555	574	UCGGACCAGGCUUCAUUCCC	::.:::::::::::::::.	UGGGAUGAAGCCUGGUCCGG	Cleavage	locus=Chr08:11066706:11074546:-	1
sbi-miR166h	DACA015342	1	-1	1	20	570	589	UCGGACCAGGCUUCAUUCCC	::.:::::::::::::::.	CGGGAUGAAGCCUGGUCCGG	Cleavage	locus=Chr07:24317952:24325668:-	1
sbi-miR166h	DACA002429	1	-1	1	20	570	589	UCGGACCAGGCUUCAUUCCC	::.:::::::::::::::.	CGGGAUGAAGCCUGGUCCGG	Cleavage	locus=Chr11:16707398:16716252:-	1
sbi-miR166i	DACA022171	1	-1	1	20	540	559	UCGGACCAGGCUUCAUUCCC	::.:::::::::::::::.	UGGGAUGAAGCCUGGUCCGG	Cleavage	locus=Chr02:2486221:2491454:+	1
sbi-miR166i	DACA002672	1	-1	1	20	555	574	UCGGACCAGGCUUCAUUCCC	::.:::::::::::::::.	UGGGAUGAAGCCUGGUCCGG	Cleavage	locus=Chr07:12662273:12669644:-	1
sbi-miR166i	DACA015342	1	-1	1	20	570	589	UCGGACCAGGCUUCAUUCCC	::.:::::::::::::::.	CGGGAUGAAGCCUGGUCCGG	Cleavage	locus=Chr07:24317952:24325668:-	1
sbi-miR166i	DACA002429	1	-1	1	20	570	589	UCGGACCAGGCUUCAUUCCC	::.:::::::::::::::.	CGGGAUGAAGCCUGGUCCGG	Cleavage	locus=Chr11:16707398:16716252:-	1
sbi-miR166i	DACA015668	1	-1	1	20	555	574	UCGGACCAGGCUUCAUUCCC	::.:::::::::::::::.	UGGGAUGAAGCCUGGUCCGG	Cleavage	locus=Chr08:11066706:11074546:-	1
sbi-miR166j	DACA002429	1	-1	1	20	570	589	UCGGACCAGGCUUCAUUCCC	::.:::::::::::::::.	CGGGAUGAAGCCUGGUCCGG	Cleavage	locus=Chr11:16707398:16716252:-	1
sbi-miR166j	DACA002672	1	-1	1	20	555	574	UCGGACCAGGCUUCAUUCCC	::.:::::::::::::::.	UGGGAUGAAGCCUGGUCCGG	Cleavage	locus=Chr07:12662273:12669644:-	1
sbi-miR166j	DACA015668	1	-1	1	20	555	574	UCGGACCAGGCUUCAUUCCC	::.:::::::::::::::.	UGGGAUGAAGCCUGGUCCGG	Cleavage	locus=Chr08:11066706:11074546:-	1
sbi-miR166j	DACA015342	1	-1	1	20	570	589	UCGGACCAGGCUUCAUUCCC	::.:::::::::::::::.	CGGGAUGAAGCCUGGUCCGG	Cleavage	locus=Chr07:24317952:24325668:-	1
sbi-miR166j	DACA022171	1	-1	1	20	540	559	UCGGACCAGGCUUCAUUCCC	::.:::::::::::::::.	UGGGAUGAAGCCUGGUCCGG	Cleavage	locus=Chr02:2486221:2491454:+	1
sbi-miR166k	DACA015668	1	-1	1	20	555	574	UCGGACCAGGCUUCAUUCCU	::.:::::::::::::::.	UGGGAUGAAGCCUGGUCCGG	Cleavage	locus=Chr08:11066706:11074546:-	1
sbi-miR166k	DACA015342	1	-1	1	20	570	589	UCGGACCAGGCUUCAUUCCU	::.:::::::::::::::.	CGGGAUGAAGCCUGGUCCGG	Cleavage	locus=Chr07:24317952:24325668:-	1
sbi-miR166k	DACA002429	1	-1	1	20	570	589	UCGGACCAGGCUUCAUUCCU	::.:::::::::::::::.	CGGGAUGAAGCCUGGUCCGG	Cleavage	locus=Chr11:16707398:16716252:-	1
sbi-miR166k	DACA002672	1	-1	1	20	555	574	UCGGACCAGGCUUCAUUCCU	::.:::::::::::::::.	UGGGAUGAAGCCUGGUCCGG	Cleavage	locus=Chr07:12662273:12669644:-	1
sbi-miR166k	DACA022171	1	-1	1	20	540	559	UCGGACCAGGCUUCAUUCCU	::.:::::::::::::::.	UGGGAUGAAGCCUGGUCCGG	Cleavage	locus=Chr02:2486221:2491454:+	1
sly-miR166a	DACA015668	1	-1	1	21	554	574	UCGGACCAGGCUUCAUUCCCC	::.:::::::::::::::.	CUGGGAUGAAGCCUGGUCCGG	Cleavage	locus=Chr08:11066706:11074546:-	1
sly-miR166a	DACA022171	1	-1	1	21	539	559	UCGGACCAGGCUUCAUUCCCC	::.:::::::::::::::.	UUGGGAUGAAGCCUGGUCCGG	Cleavage	locus=Chr02:2486221:2491454:+	1
sly-miR166a	DACA002429	1	-1	1	21	569	589	UCGGACCAGGCUUCAUUCCCC	::.:::::::::::::::.	CCGGGAUGAAGCCUGGUCCGG	Cleavage	locus=Chr11:16707398:16716252:-	1
sly-miR166a	DACA002672	1	-1	1	21	554	574	UCGGACCAGGCUUCAUUCCCC	::.:::::::::::::::.	CUGGGAUGAAGCCUGGUCCGG	Cleavage	locus=Chr07:12662273:12669644:-	1
sly-miR166a	DACA015342	1	-1	1	21	569	589	UCGGACCAGGCUUCAUUCCCC	::.:::::::::::::::.	CCGGGAUGAAGCCUGGUCCGG	Cleavage	locus=Chr07:24317952:24325668:-	1
sly-miR166b	DACA022171	1	-1	1	21	539	559	UCGGACCAGGCUUCAUUCCCC	::.:::::::::::::::.	UUGGGAUGAAGCCUGGUCCGG	Cleavage	locus=Chr02:2486221:2491454:+	1
sly-miR166b	DACA015668	1	-1	1	21	554	574	UCGGACCAGGCUUCAUUCCCC	::.:::::::::::::::.	CUGGGAUGAAGCCUGGUCCGG	Cleavage	locus=Chr08:11066706:11074546:-	1
sly-miR166b	DACA015342	1	-1	1	21	569	589	UCGGACCAGGCUUCAUUCCCC	::.:::::::::::::::.	CCGGGAUGAAGCCUGGUCCGG	Cleavage	locus=Chr07:24317952:24325668:-	1
sly-miR166b	DACA002429	1	-1	1	21	569	589	UCGGACCAGGCUUCAUUCCCC	::.:::::::::::::::.	CCGGGAUGAAGCCUGGUCCGG	Cleavage	locus=Chr11:16707398:16716252:-	1
sly-miR166b	DACA002672	1	-1	1	21	554	574	UCGGACCAGGCUUCAUUCCCC	::.:::::::::::::::.	CUGGGAUGAAGCCUGGUCCGG	Cleavage	locus=Chr07:12662273:12669644:-	1
sly-miR166c-3p	DACA015668	1	-1	1	21	554	574	UCGGACCAGGCUUCAUUCCUC	::.:::::::::::::::.	CUGGGAUGAAGCCUGGUCCGG	Cleavage	locus=Chr08:11066706:11074546:-	1
sly-miR166c-3p	DACA002672	1	-1	1	21	554	574	UCGGACCAGGCUUCAUUCCUC	::.:::::::::::::::.	CUGGGAUGAAGCCUGGUCCGG	Cleavage	locus=Chr07:12662273:12669644:-	1
sly-miR166c-3p	DACA022171	1	-1	1	21	539	559	UCGGACCAGGCUUCAUUCCUC	::.:::::::::::::::.	UUGGGAUGAAGCCUGGUCCGG	Cleavage	locus=Chr02:2486221:2491454:+	1
sly-miR166c-3p	DACA015342	1	-1	1	21	569	589	UCGGACCAGGCUUCAUUCCUC	::.:::::::::::::::.	CCGGGAUGAAGCCUGGUCCGG	Cleavage	locus=Chr07:24317952:24325668:-	1
sly-miR166c-3p	DACA002429	1	-1	1	21	569	589	UCGGACCAGGCUUCAUUCCUC	::.:::::::::::::::.	CCGGGAUGAAGCCUGGUCCGG	Cleavage	locus=Chr11:16707398:16716252:-	1
smo-miR166a	DACA022171	1	-1	1	21	539	559	UCGGACCAGGCUUCAUUCCCC	::.:::::::::::::::.	UUGGGAUGAAGCCUGGUCCGG	Cleavage	locus=Chr02:2486221:2491454:+	1
smo-miR166a	DACA015342	1	-1	1	21	569	589	UCGGACCAGGCUUCAUUCCCC	::.:::::::::::::::.	CCGGGAUGAAGCCUGGUCCGG	Cleavage	locus=Chr07:24317952:24325668:-	1
smo-miR166a	DACA002672	1	-1	1	21	554	574	UCGGACCAGGCUUCAUUCCCC	::.:::::::::::::::.	CUGGGAUGAAGCCUGGUCCGG	Cleavage	locus=Chr07:12662273:12669644:-	1
smo-miR166a	DACA015668	1	-1	1	21	554	574	UCGGACCAGGCUUCAUUCCCC	::.:::::::::::::::.	CUGGGAUGAAGCCUGGUCCGG	Cleavage	locus=Chr08:11066706:11074546:-	1
smo-miR166a	DACA002429	1	-1	1	21	569	589	UCGGACCAGGCUUCAUUCCCC	::.:::::::::::::::.	CCGGGAUGAAGCCUGGUCCGG	Cleavage	locus=Chr11:16707398:16716252:-	1
smo-miR166b	DACA022171	1	-1	1	21	539	559	UCGGACCAGGCUUCAUUCCCC	::.:::::::::::::::.	UUGGGAUGAAGCCUGGUCCGG	Cleavage	locus=Chr02:2486221:2491454:+	1
smo-miR166b	DACA015342	1	-1	1	21	569	589	UCGGACCAGGCUUCAUUCCCC	::.:::::::::::::::.	CCGGGAUGAAGCCUGGUCCGG	Cleavage	locus=Chr07:24317952:24325668:-	1
smo-miR166b	DACA002429	1	-1	1	21	569	589	UCGGACCAGGCUUCAUUCCCC	::.:::::::::::::::.	CCGGGAUGAAGCCUGGUCCGG	Cleavage	locus=Chr11:16707398:16716252:-	1
smo-miR166b	DACA002672	1	-1	1	21	554	574	UCGGACCAGGCUUCAUUCCCC	::.:::::::::::::::.	CUGGGAUGAAGCCUGGUCCGG	Cleavage	locus=Chr07:12662273:12669644:-	1
smo-miR166b	DACA015668	1	-1	1	21	554	574	UCGGACCAGGCUUCAUUCCCC	::.:::::::::::::::.	CUGGGAUGAAGCCUGGUCCGG	Cleavage	locus=Chr08:11066706:11074546:-	1
smo-miR166c	DACA015668	1	-1	1	21	554	574	UCGGACCAGGCUUCAUUCCCC	::.:::::::::::::::.	CUGGGAUGAAGCCUGGUCCGG	Cleavage	locus=Chr08:11066706:11074546:-	1
smo-miR166c	DACA015342	1	-1	1	21	569	589	UCGGACCAGGCUUCAUUCCCC	::.:::::::::::::::.	CCGGGAUGAAGCCUGGUCCGG	Cleavage	locus=Chr07:24317952:24325668:-	1
smo-miR166c	DACA002429	1	-1	1	21	569	589	UCGGACCAGGCUUCAUUCCCC	::.:::::::::::::::.	CCGGGAUGAAGCCUGGUCCGG	Cleavage	locus=Chr11:16707398:16716252:-	1
smo-miR166c	DACA022171	1	-1	1	21	539	559	UCGGACCAGGCUUCAUUCCCC	::.:::::::::::::::.	UUGGGAUGAAGCCUGGUCCGG	Cleavage	locus=Chr02:2486221:2491454:+	1
smo-miR166c	DACA002672	1	-1	1	21	554	574	UCGGACCAGGCUUCAUUCCCC	::.:::::::::::::::.	CUGGGAUGAAGCCUGGUCCGG	Cleavage	locus=Chr07:12662273:12669644:-	1
ssl-miR166a	DACA015668	1	-1	1	21	554	574	UCGGACCAGGCUUCAUUCCUC	::.:::::::::::::::.	CUGGGAUGAAGCCUGGUCCGG	Cleavage	locus=Chr08:11066706:11074546:-	1
ssl-miR166a	DACA015342	1	-1	1	21	569	589	UCGGACCAGGCUUCAUUCCUC	::.:::::::::::::::.	CCGGGAUGAAGCCUGGUCCGG	Cleavage	locus=Chr07:24317952:24325668:-	1
ssl-miR166a	DACA002672	1	-1	1	21	554	574	UCGGACCAGGCUUCAUUCCUC	::.:::::::::::::::.	CUGGGAUGAAGCCUGGUCCGG	Cleavage	locus=Chr07:12662273:12669644:-	1
ssl-miR166a	DACA002429	1	-1	1	21	569	589	UCGGACCAGGCUUCAUUCCUC	::.:::::::::::::::.	CCGGGAUGAAGCCUGGUCCGG	Cleavage	locus=Chr11:16707398:16716252:-	1
ssl-miR166a	DACA022171	1	-1	1	21	539	559	UCGGACCAGGCUUCAUUCCUC	::.:::::::::::::::.	UUGGGAUGAAGCCUGGUCCGG	Cleavage	locus=Chr02:2486221:2491454:+	1
ssl-miR166b	DACA002429	1	-1	1	21	569	589	UCGGACCAGGCUUCAUUCCCC	::.:::::::::::::::.	CCGGGAUGAAGCCUGGUCCGG	Cleavage	locus=Chr11:16707398:16716252:-	1
ssl-miR166b	DACA022171	1	-1	1	21	539	559	UCGGACCAGGCUUCAUUCCCC	::.:::::::::::::::.	UUGGGAUGAAGCCUGGUCCGG	Cleavage	locus=Chr02:2486221:2491454:+	1
ssl-miR166b	DACA015668	1	-1	1	21	554	574	UCGGACCAGGCUUCAUUCCCC	::.:::::::::::::::.	CUGGGAUGAAGCCUGGUCCGG	Cleavage	locus=Chr08:11066706:11074546:-	1
ssl-miR166b	DACA015342	1	-1	1	21	569	589	UCGGACCAGGCUUCAUUCCCC	::.:::::::::::::::.	CCGGGAUGAAGCCUGGUCCGG	Cleavage	locus=Chr07:24317952:24325668:-	1
ssl-miR166b	DACA002672	1	-1	1	21	554	574	UCGGACCAGGCUUCAUUCCCC	::.:::::::::::::::.	CUGGGAUGAAGCCUGGUCCGG	Cleavage	locus=Chr07:12662273:12669644:-	1
ssp-miR166	DACA015668	1	-1	1	21	554	574	UCGGACCAGGCUUCAUUCCCC	::.:::::::::::::::.	CUGGGAUGAAGCCUGGUCCGG	Cleavage	locus=Chr08:11066706:11074546:-	1
ssp-miR166	DACA015342	1	-1	1	21	569	589	UCGGACCAGGCUUCAUUCCCC	::.:::::::::::::::.	CCGGGAUGAAGCCUGGUCCGG	Cleavage	locus=Chr07:24317952:24325668:-	1
ssp-miR166	DACA002429	1	-1	1	21	569	589	UCGGACCAGGCUUCAUUCCCC	::.:::::::::::::::.	CCGGGAUGAAGCCUGGUCCGG	Cleavage	locus=Chr11:16707398:16716252:-	1
ssp-miR166	DACA002672	1	-1	1	21	554	574	UCGGACCAGGCUUCAUUCCCC	::.:::::::::::::::.	CUGGGAUGAAGCCUGGUCCGG	Cleavage	locus=Chr07:12662273:12669644:-	1
ssp-miR166	DACA022171	1	-1	1	21	539	559	UCGGACCAGGCUUCAUUCCCC	::.:::::::::::::::.	UUGGGAUGAAGCCUGGUCCGG	Cleavage	locus=Chr02:2486221:2491454:+	1
stu-miR166a-3p	DACA022171	1	-1	1	21	539	559	UCGGACCAGGCUUCAUUCCCC	::.:::::::::::::::.	UUGGGAUGAAGCCUGGUCCGG	Cleavage	locus=Chr02:2486221:2491454:+	1
stu-miR166a-3p	DACA002672	1	-1	1	21	554	574	UCGGACCAGGCUUCAUUCCCC	::.:::::::::::::::.	CUGGGAUGAAGCCUGGUCCGG	Cleavage	locus=Chr07:12662273:12669644:-	1
stu-miR166a-3p	DACA015342	1	-1	1	21	569	589	UCGGACCAGGCUUCAUUCCCC	::.:::::::::::::::.	CCGGGAUGAAGCCUGGUCCGG	Cleavage	locus=Chr07:24317952:24325668:-	1
stu-miR166a-3p	DACA002429	1	-1	1	21	569	589	UCGGACCAGGCUUCAUUCCCC	::.:::::::::::::::.	CCGGGAUGAAGCCUGGUCCGG	Cleavage	locus=Chr11:16707398:16716252:-	1
stu-miR166a-3p	DACA015668	1	-1	1	21	554	574	UCGGACCAGGCUUCAUUCCCC	::.:::::::::::::::.	CUGGGAUGAAGCCUGGUCCGG	Cleavage	locus=Chr08:11066706:11074546:-	1
stu-miR166b	DACA015342	1	-1	1	21	569	589	UCGGACCAGGCUUCAUUCCUC	::.:::::::::::::::.	CCGGGAUGAAGCCUGGUCCGG	Cleavage	locus=Chr07:24317952:24325668:-	1
stu-miR166b	DACA002429	1	-1	1	21	569	589	UCGGACCAGGCUUCAUUCCUC	::.:::::::::::::::.	CCGGGAUGAAGCCUGGUCCGG	Cleavage	locus=Chr11:16707398:16716252:-	1
stu-miR166b	DACA022171	1	-1	1	21	539	559	UCGGACCAGGCUUCAUUCCUC	::.:::::::::::::::.	UUGGGAUGAAGCCUGGUCCGG	Cleavage	locus=Chr02:2486221:2491454:+	1
stu-miR166b	DACA002672	1	-1	1	21	554	574	UCGGACCAGGCUUCAUUCCUC	::.:::::::::::::::.	CUGGGAUGAAGCCUGGUCCGG	Cleavage	locus=Chr07:12662273:12669644:-	1
stu-miR166b	DACA015668	1	-1	1	21	554	574	UCGGACCAGGCUUCAUUCCUC	::.:::::::::::::::.	CUGGGAUGAAGCCUGGUCCGG	Cleavage	locus=Chr08:11066706:11074546:-	1
stu-miR166c-3p	DACA015668	1	-1	1	21	554	574	UCGGACCAGGCUUCAUUCCCC	::.:::::::::::::::.	CUGGGAUGAAGCCUGGUCCGG	Cleavage	locus=Chr08:11066706:11074546:-	1
stu-miR166c-3p	DACA015342	1	-1	1	21	569	589	UCGGACCAGGCUUCAUUCCCC	::.:::::::::::::::.	CCGGGAUGAAGCCUGGUCCGG	Cleavage	locus=Chr07:24317952:24325668:-	1
stu-miR166c-3p	DACA002429	1	-1	1	21	569	589	UCGGACCAGGCUUCAUUCCCC	::.:::::::::::::::.	CCGGGAUGAAGCCUGGUCCGG	Cleavage	locus=Chr11:16707398:16716252:-	1
stu-miR166c-3p	DACA022171	1	-1	1	21	539	559	UCGGACCAGGCUUCAUUCCCC	::.:::::::::::::::.	UUGGGAUGAAGCCUGGUCCGG	Cleavage	locus=Chr02:2486221:2491454:+	1
stu-miR166c-3p	DACA002672	1	-1	1	21	554	574	UCGGACCAGGCUUCAUUCCCC	::.:::::::::::::::.	CUGGGAUGAAGCCUGGUCCGG	Cleavage	locus=Chr07:12662273:12669644:-	1
stu-miR166d-3p	DACA002672	1	-1	1	21	554	574	UCGGACCAGGCUUCAUUCCCC	::.:::::::::::::::.	CUGGGAUGAAGCCUGGUCCGG	Cleavage	locus=Chr07:12662273:12669644:-	1
stu-miR166d-3p	DACA015668	1	-1	1	21	554	574	UCGGACCAGGCUUCAUUCCCC	::.:::::::::::::::.	CUGGGAUGAAGCCUGGUCCGG	Cleavage	locus=Chr08:11066706:11074546:-	1
stu-miR166d-3p	DACA015342	1	-1	1	21	569	589	UCGGACCAGGCUUCAUUCCCC	::.:::::::::::::::.	CCGGGAUGAAGCCUGGUCCGG	Cleavage	locus=Chr07:24317952:24325668:-	1
stu-miR166d-3p	DACA002429	1	-1	1	21	569	589	UCGGACCAGGCUUCAUUCCCC	::.:::::::::::::::.	CCGGGAUGAAGCCUGGUCCGG	Cleavage	locus=Chr11:16707398:16716252:-	1
stu-miR166d-3p	DACA022171	1	-1	1	21	539	559	UCGGACCAGGCUUCAUUCCCC	::.:::::::::::::::.	UUGGGAUGAAGCCUGGUCCGG	Cleavage	locus=Chr02:2486221:2491454:+	1
tcc-miR166a	DACA015668	1	-1	1	21	554	574	UCGGACCAGGCUUCAUUCCCC	::.:::::::::::::::.	CUGGGAUGAAGCCUGGUCCGG	Cleavage	locus=Chr08:11066706:11074546:-	1
tcc-miR166a	DACA015342	1	-1	1	21	569	589	UCGGACCAGGCUUCAUUCCCC	::.:::::::::::::::.	CCGGGAUGAAGCCUGGUCCGG	Cleavage	locus=Chr07:24317952:24325668:-	1
tcc-miR166a	DACA002429	1	-1	1	21	569	589	UCGGACCAGGCUUCAUUCCCC	::.:::::::::::::::.	CCGGGAUGAAGCCUGGUCCGG	Cleavage	locus=Chr11:16707398:16716252:-	1
tcc-miR166a	DACA002672	1	-1	1	21	554	574	UCGGACCAGGCUUCAUUCCCC	::.:::::::::::::::.	CUGGGAUGAAGCCUGGUCCGG	Cleavage	locus=Chr07:12662273:12669644:-	1
tcc-miR166a	DACA022171	1	-1	1	21	539	559	UCGGACCAGGCUUCAUUCCCC	::.:::::::::::::::.	UUGGGAUGAAGCCUGGUCCGG	Cleavage	locus=Chr02:2486221:2491454:+	1
tcc-miR166b	DACA022171	1	-1	1	20	540	559	UCGGACCAGGCUUCAUUCCC	::.:::::::::::::::.	UGGGAUGAAGCCUGGUCCGG	Cleavage	locus=Chr02:2486221:2491454:+	1
tcc-miR166b	DACA015342	1	-1	1	20	570	589	UCGGACCAGGCUUCAUUCCC	::.:::::::::::::::.	CGGGAUGAAGCCUGGUCCGG	Cleavage	locus=Chr07:24317952:24325668:-	1
tcc-miR166b	DACA002429	1	-1	1	20	570	589	UCGGACCAGGCUUCAUUCCC	::.:::::::::::::::.	CGGGAUGAAGCCUGGUCCGG	Cleavage	locus=Chr11:16707398:16716252:-	1
tcc-miR166b	DACA002672	1	-1	1	20	555	574	UCGGACCAGGCUUCAUUCCC	::.:::::::::::::::.	UGGGAUGAAGCCUGGUCCGG	Cleavage	locus=Chr07:12662273:12669644:-	1
tcc-miR166b	DACA015668	1	-1	1	20	555	574	UCGGACCAGGCUUCAUUCCC	::.:::::::::::::::.	UGGGAUGAAGCCUGGUCCGG	Cleavage	locus=Chr08:11066706:11074546:-	1
tcc-miR166c	DACA022171	1	-1	1	21	539	559	UCGGACCAGGCUUCAUUCCUC	::.:::::::::::::::.	UUGGGAUGAAGCCUGGUCCGG	Cleavage	locus=Chr02:2486221:2491454:+	1
tcc-miR166c	DACA015668	1	-1	1	21	554	574	UCGGACCAGGCUUCAUUCCUC	::.:::::::::::::::.	CUGGGAUGAAGCCUGGUCCGG	Cleavage	locus=Chr08:11066706:11074546:-	1
tcc-miR166c	DACA015342	1	-1	1	21	569	589	UCGGACCAGGCUUCAUUCCUC	::.:::::::::::::::.	CCGGGAUGAAGCCUGGUCCGG	Cleavage	locus=Chr07:24317952:24325668:-	1
tcc-miR166c	DACA002429	1	-1	1	21	569	589	UCGGACCAGGCUUCAUUCCUC	::.:::::::::::::::.	CCGGGAUGAAGCCUGGUCCGG	Cleavage	locus=Chr11:16707398:16716252:-	1
tcc-miR166c	DACA002672	1	-1	1	21	554	574	UCGGACCAGGCUUCAUUCCUC	::.:::::::::::::::.	CUGGGAUGAAGCCUGGUCCGG	Cleavage	locus=Chr07:12662273:12669644:-	1
tcc-miR166d	DACA002672	1	-1	1	21	554	574	UCGGACCAGGCUUCAUUCCCC	::.:::::::::::::::.	CUGGGAUGAAGCCUGGUCCGG	Cleavage	locus=Chr07:12662273:12669644:-	1
tcc-miR166d	DACA022171	1	-1	1	21	539	559	UCGGACCAGGCUUCAUUCCCC	::.:::::::::::::::.	UUGGGAUGAAGCCUGGUCCGG	Cleavage	locus=Chr02:2486221:2491454:+	1
tcc-miR166d	DACA015342	1	-1	1	21	569	589	UCGGACCAGGCUUCAUUCCCC	::.:::::::::::::::.	CCGGGAUGAAGCCUGGUCCGG	Cleavage	locus=Chr07:24317952:24325668:-	1
tcc-miR166d	DACA002429	1	-1	1	21	569	589	UCGGACCAGGCUUCAUUCCCC	::.:::::::::::::::.	CCGGGAUGAAGCCUGGUCCGG	Cleavage	locus=Chr11:16707398:16716252:-	1
tcc-miR166d	DACA015668	1	-1	1	21	554	574	UCGGACCAGGCUUCAUUCCCC	::.:::::::::::::::.	CUGGGAUGAAGCCUGGUCCGG	Cleavage	locus=Chr08:11066706:11074546:-	1
vvi-miR166a	DACA002672	1	-1	1	19	556	574	UCGGACCAGGCUUCAUUCC	::.:::::::::::::::.	GGGAUGAAGCCUGGUCCGG	Cleavage	locus=Chr07:12662273:12669644:-	1
vvi-miR166a	DACA002429	1	-1	1	19	571	589	UCGGACCAGGCUUCAUUCC	::.:::::::::::::::.	GGGAUGAAGCCUGGUCCGG	Cleavage	locus=Chr11:16707398:16716252:-	1
vvi-miR166a	DACA022171	1	-1	1	19	541	559	UCGGACCAGGCUUCAUUCC	::.:::::::::::::::.	GGGAUGAAGCCUGGUCCGG	Cleavage	locus=Chr02:2486221:2491454:+	1
vvi-miR166a	DACA015668	1	-1	1	19	556	574	UCGGACCAGGCUUCAUUCC	::.:::::::::::::::.	GGGAUGAAGCCUGGUCCGG	Cleavage	locus=Chr08:11066706:11074546:-	1
vvi-miR166a	DACA015342	1	-1	1	19	571	589	UCGGACCAGGCUUCAUUCC	::.:::::::::::::::.	GGGAUGAAGCCUGGUCCGG	Cleavage	locus=Chr07:24317952:24325668:-	1
vvi-miR166b	DACA015342	1	-1	1	19	571	589	UCGGACCAGGCUUCAUUCC	::.:::::::::::::::.	GGGAUGAAGCCUGGUCCGG	Cleavage	locus=Chr07:24317952:24325668:-	1
vvi-miR166b	DACA015668	1	-1	1	19	556	574	UCGGACCAGGCUUCAUUCC	::.:::::::::::::::.	GGGAUGAAGCCUGGUCCGG	Cleavage	locus=Chr08:11066706:11074546:-	1
vvi-miR166b	DACA002672	1	-1	1	19	556	574	UCGGACCAGGCUUCAUUCC	::.:::::::::::::::.	GGGAUGAAGCCUGGUCCGG	Cleavage	locus=Chr07:12662273:12669644:-	1
vvi-miR166b	DACA002429	1	-1	1	19	571	589	UCGGACCAGGCUUCAUUCC	::.:::::::::::::::.	GGGAUGAAGCCUGGUCCGG	Cleavage	locus=Chr11:16707398:16716252:-	1
vvi-miR166b	DACA022171	1	-1	1	19	541	559	UCGGACCAGGCUUCAUUCC	::.:::::::::::::::.	GGGAUGAAGCCUGGUCCGG	Cleavage	locus=Chr02:2486221:2491454:+	1
vvi-miR166c	DACA015342	1	-1	1	21	569	589	UCGGACCAGGCUUCAUUCCCC	::.:::::::::::::::.	CCGGGAUGAAGCCUGGUCCGG	Cleavage	locus=Chr07:24317952:24325668:-	1
vvi-miR166c	DACA002429	1	-1	1	21	569	589	UCGGACCAGGCUUCAUUCCCC	::.:::::::::::::::.	CCGGGAUGAAGCCUGGUCCGG	Cleavage	locus=Chr11:16707398:16716252:-	1
vvi-miR166c	DACA002672	1	-1	1	21	554	574	UCGGACCAGGCUUCAUUCCCC	::.:::::::::::::::.	CUGGGAUGAAGCCUGGUCCGG	Cleavage	locus=Chr07:12662273:12669644:-	1
vvi-miR166c	DACA022171	1	-1	1	21	539	559	UCGGACCAGGCUUCAUUCCCC	::.:::::::::::::::.	UUGGGAUGAAGCCUGGUCCGG	Cleavage	locus=Chr02:2486221:2491454:+	1
vvi-miR166c	DACA015668	1	-1	1	21	554	574	UCGGACCAGGCUUCAUUCCCC	::.:::::::::::::::.	CUGGGAUGAAGCCUGGUCCGG	Cleavage	locus=Chr08:11066706:11074546:-	1
vvi-miR166d	DACA015342	1	-1	1	21	569	589	UCGGACCAGGCUUCAUUCCCC	::.:::::::::::::::.	CCGGGAUGAAGCCUGGUCCGG	Cleavage	locus=Chr07:24317952:24325668:-	1
vvi-miR166d	DACA002429	1	-1	1	21	569	589	UCGGACCAGGCUUCAUUCCCC	::.:::::::::::::::.	CCGGGAUGAAGCCUGGUCCGG	Cleavage	locus=Chr11:16707398:16716252:-	1
vvi-miR166d	DACA022171	1	-1	1	21	539	559	UCGGACCAGGCUUCAUUCCCC	::.:::::::::::::::.	UUGGGAUGAAGCCUGGUCCGG	Cleavage	locus=Chr02:2486221:2491454:+	1
vvi-miR166d	DACA002672	1	-1	1	21	554	574	UCGGACCAGGCUUCAUUCCCC	::.:::::::::::::::.	CUGGGAUGAAGCCUGGUCCGG	Cleavage	locus=Chr07:12662273:12669644:-	1
vvi-miR166d	DACA015668	1	-1	1	21	554	574	UCGGACCAGGCUUCAUUCCCC	::.:::::::::::::::.	CUGGGAUGAAGCCUGGUCCGG	Cleavage	locus=Chr08:11066706:11074546:-	1
vvi-miR166e	DACA002672	1	-1	1	21	554	574	UCGGACCAGGCUUCAUUCCCC	::.:::::::::::::::.	CUGGGAUGAAGCCUGGUCCGG	Cleavage	locus=Chr07:12662273:12669644:-	1
vvi-miR166e	DACA022171	1	-1	1	21	539	559	UCGGACCAGGCUUCAUUCCCC	::.:::::::::::::::.	UUGGGAUGAAGCCUGGUCCGG	Cleavage	locus=Chr02:2486221:2491454:+	1
vvi-miR166e	DACA015668	1	-1	1	21	554	574	UCGGACCAGGCUUCAUUCCCC	::.:::::::::::::::.	CUGGGAUGAAGCCUGGUCCGG	Cleavage	locus=Chr08:11066706:11074546:-	1
vvi-miR166e	DACA015342	1	-1	1	21	569	589	UCGGACCAGGCUUCAUUCCCC	::.:::::::::::::::.	CCGGGAUGAAGCCUGGUCCGG	Cleavage	locus=Chr07:24317952:24325668:-	1
vvi-miR166e	DACA002429	1	-1	1	21	569	589	UCGGACCAGGCUUCAUUCCCC	::.:::::::::::::::.	CCGGGAUGAAGCCUGGUCCGG	Cleavage	locus=Chr11:16707398:16716252:-	1
vvi-miR166f	DACA022171	1	-1	1	21	539	559	UCGGACCAGGCUUCAUUCCCC	::.:::::::::::::::.	UUGGGAUGAAGCCUGGUCCGG	Cleavage	locus=Chr02:2486221:2491454:+	1
vvi-miR166f	DACA002672	1	-1	1	21	554	574	UCGGACCAGGCUUCAUUCCCC	::.:::::::::::::::.	CUGGGAUGAAGCCUGGUCCGG	Cleavage	locus=Chr07:12662273:12669644:-	1
vvi-miR166f	DACA015668	1	-1	1	21	554	574	UCGGACCAGGCUUCAUUCCCC	::.:::::::::::::::.	CUGGGAUGAAGCCUGGUCCGG	Cleavage	locus=Chr08:11066706:11074546:-	1
vvi-miR166f	DACA015342	1	-1	1	21	569	589	UCGGACCAGGCUUCAUUCCCC	::.:::::::::::::::.	CCGGGAUGAAGCCUGGUCCGG	Cleavage	locus=Chr07:24317952:24325668:-	1
vvi-miR166f	DACA002429	1	-1	1	21	569	589	UCGGACCAGGCUUCAUUCCCC	::.:::::::::::::::.	CCGGGAUGAAGCCUGGUCCGG	Cleavage	locus=Chr11:16707398:16716252:-	1
vvi-miR166g	DACA002429	1	-1	1	21	569	589	UCGGACCAGGCUUCAUUCCCC	::.:::::::::::::::.	CCGGGAUGAAGCCUGGUCCGG	Cleavage	locus=Chr11:16707398:16716252:-	1
vvi-miR166g	DACA015668	1	-1	1	21	554	574	UCGGACCAGGCUUCAUUCCCC	::.:::::::::::::::.	CUGGGAUGAAGCCUGGUCCGG	Cleavage	locus=Chr08:11066706:11074546:-	1
vvi-miR166g	DACA015342	1	-1	1	21	569	589	UCGGACCAGGCUUCAUUCCCC	::.:::::::::::::::.	CCGGGAUGAAGCCUGGUCCGG	Cleavage	locus=Chr07:24317952:24325668:-	1
vvi-miR166g	DACA022171	1	-1	1	21	539	559	UCGGACCAGGCUUCAUUCCCC	::.:::::::::::::::.	UUGGGAUGAAGCCUGGUCCGG	Cleavage	locus=Chr02:2486221:2491454:+	1
vvi-miR166g	DACA002672	1	-1	1	21	554	574	UCGGACCAGGCUUCAUUCCCC	::.:::::::::::::::.	CUGGGAUGAAGCCUGGUCCGG	Cleavage	locus=Chr07:12662273:12669644:-	1
vvi-miR166h	DACA002672	1	-1	1	21	554	574	UCGGACCAGGCUUCAUUCCCC	::.:::::::::::::::.	CUGGGAUGAAGCCUGGUCCGG	Cleavage	locus=Chr07:12662273:12669644:-	1
vvi-miR166h	DACA022171	1	-1	1	21	539	559	UCGGACCAGGCUUCAUUCCCC	::.:::::::::::::::.	UUGGGAUGAAGCCUGGUCCGG	Cleavage	locus=Chr02:2486221:2491454:+	1
vvi-miR166h	DACA015668	1	-1	1	21	554	574	UCGGACCAGGCUUCAUUCCCC	::.:::::::::::::::.	CUGGGAUGAAGCCUGGUCCGG	Cleavage	locus=Chr08:11066706:11074546:-	1
vvi-miR166h	DACA015342	1	-1	1	21	569	589	UCGGACCAGGCUUCAUUCCCC	::.:::::::::::::::.	CCGGGAUGAAGCCUGGUCCGG	Cleavage	locus=Chr07:24317952:24325668:-	1
vvi-miR166h	DACA002429	1	-1	1	21	569	589	UCGGACCAGGCUUCAUUCCCC	::.:::::::::::::::.	CCGGGAUGAAGCCUGGUCCGG	Cleavage	locus=Chr11:16707398:16716252:-	1
zma-miR166a-3p	DACA015668	1	-1	1	21	554	574	UCGGACCAGGCUUCAUUCCCC	::.:::::::::::::::.	CUGGGAUGAAGCCUGGUCCGG	Cleavage	locus=Chr08:11066706:11074546:-	1
zma-miR166a-3p	DACA015342	1	-1	1	21	569	589	UCGGACCAGGCUUCAUUCCCC	::.:::::::::::::::.	CCGGGAUGAAGCCUGGUCCGG	Cleavage	locus=Chr07:24317952:24325668:-	1
zma-miR166a-3p	DACA002429	1	-1	1	21	569	589	UCGGACCAGGCUUCAUUCCCC	::.:::::::::::::::.	CCGGGAUGAAGCCUGGUCCGG	Cleavage	locus=Chr11:16707398:16716252:-	1
zma-miR166a-3p	DACA022171	1	-1	1	21	539	559	UCGGACCAGGCUUCAUUCCCC	::.:::::::::::::::.	UUGGGAUGAAGCCUGGUCCGG	Cleavage	locus=Chr02:2486221:2491454:+	1
zma-miR166a-3p	DACA002672	1	-1	1	21	554	574	UCGGACCAGGCUUCAUUCCCC	::.:::::::::::::::.	CUGGGAUGAAGCCUGGUCCGG	Cleavage	locus=Chr07:12662273:12669644:-	1
zma-miR166b-3p	DACA002672	1	-1	1	20	555	574	UCGGACCAGGCUUCAUUCCC	::.:::::::::::::::.	UGGGAUGAAGCCUGGUCCGG	Cleavage	locus=Chr07:12662273:12669644:-	1
zma-miR166b-3p	DACA015668	1	-1	1	20	555	574	UCGGACCAGGCUUCAUUCCC	::.:::::::::::::::.	UGGGAUGAAGCCUGGUCCGG	Cleavage	locus=Chr08:11066706:11074546:-	1
zma-miR166b-3p	DACA015342	1	-1	1	20	570	589	UCGGACCAGGCUUCAUUCCC	::.:::::::::::::::.	CGGGAUGAAGCCUGGUCCGG	Cleavage	locus=Chr07:24317952:24325668:-	1
zma-miR166b-3p	DACA022171	1	-1	1	20	540	559	UCGGACCAGGCUUCAUUCCC	::.:::::::::::::::.	UGGGAUGAAGCCUGGUCCGG	Cleavage	locus=Chr02:2486221:2491454:+	1
zma-miR166b-3p	DACA002429	1	-1	1	20	570	589	UCGGACCAGGCUUCAUUCCC	::.:::::::::::::::.	CGGGAUGAAGCCUGGUCCGG	Cleavage	locus=Chr11:16707398:16716252:-	1
zma-miR166c-3p	DACA002672	1	-1	1	20	555	574	UCGGACCAGGCUUCAUUCCC	::.:::::::::::::::.	UGGGAUGAAGCCUGGUCCGG	Cleavage	locus=Chr07:12662273:12669644:-	1
zma-miR166c-3p	DACA022171	1	-1	1	20	540	559	UCGGACCAGGCUUCAUUCCC	::.:::::::::::::::.	UGGGAUGAAGCCUGGUCCGG	Cleavage	locus=Chr02:2486221:2491454:+	1
zma-miR166c-3p	DACA015668	1	-1	1	20	555	574	UCGGACCAGGCUUCAUUCCC	::.:::::::::::::::.	UGGGAUGAAGCCUGGUCCGG	Cleavage	locus=Chr08:11066706:11074546:-	1
zma-miR166c-3p	DACA015342	1	-1	1	20	570	589	UCGGACCAGGCUUCAUUCCC	::.:::::::::::::::.	CGGGAUGAAGCCUGGUCCGG	Cleavage	locus=Chr07:24317952:24325668:-	1
zma-miR166c-3p	DACA002429	1	-1	1	20	570	589	UCGGACCAGGCUUCAUUCCC	::.:::::::::::::::.	CGGGAUGAAGCCUGGUCCGG	Cleavage	locus=Chr11:16707398:16716252:-	1
zma-miR166d-3p	DACA015342	1	-1	1	20	570	589	UCGGACCAGGCUUCAUUCCC	::.:::::::::::::::.	CGGGAUGAAGCCUGGUCCGG	Cleavage	locus=Chr07:24317952:24325668:-	1
zma-miR166d-3p	DACA015668	1	-1	1	20	555	574	UCGGACCAGGCUUCAUUCCC	::.:::::::::::::::.	UGGGAUGAAGCCUGGUCCGG	Cleavage	locus=Chr08:11066706:11074546:-	1
zma-miR166d-3p	DACA002672	1	-1	1	20	555	574	UCGGACCAGGCUUCAUUCCC	::.:::::::::::::::.	UGGGAUGAAGCCUGGUCCGG	Cleavage	locus=Chr07:12662273:12669644:-	1
zma-miR166d-3p	DACA002429	1	-1	1	20	570	589	UCGGACCAGGCUUCAUUCCC	::.:::::::::::::::.	CGGGAUGAAGCCUGGUCCGG	Cleavage	locus=Chr11:16707398:16716252:-	1
zma-miR166d-3p	DACA022171	1	-1	1	20	540	559	UCGGACCAGGCUUCAUUCCC	::.:::::::::::::::.	UGGGAUGAAGCCUGGUCCGG	Cleavage	locus=Chr02:2486221:2491454:+	1
zma-miR166e	DACA015342	1	-1	1	20	570	589	UCGGACCAGGCUUCAUUCCC	::.:::::::::::::::.	CGGGAUGAAGCCUGGUCCGG	Cleavage	locus=Chr07:24317952:24325668:-	1
zma-miR166e	DACA022171	1	-1	1	20	540	559	UCGGACCAGGCUUCAUUCCC	::.:::::::::::::::.	UGGGAUGAAGCCUGGUCCGG	Cleavage	locus=Chr02:2486221:2491454:+	1
zma-miR166e	DACA015668	1	-1	1	20	555	574	UCGGACCAGGCUUCAUUCCC	::.:::::::::::::::.	UGGGAUGAAGCCUGGUCCGG	Cleavage	locus=Chr08:11066706:11074546:-	1
zma-miR166e	DACA002672	1	-1	1	20	555	574	UCGGACCAGGCUUCAUUCCC	::.:::::::::::::::.	UGGGAUGAAGCCUGGUCCGG	Cleavage	locus=Chr07:12662273:12669644:-	1
zma-miR166e	DACA002429	1	-1	1	20	570	589	UCGGACCAGGCUUCAUUCCC	::.:::::::::::::::.	CGGGAUGAAGCCUGGUCCGG	Cleavage	locus=Chr11:16707398:16716252:-	1
zma-miR166f	DACA015668	1	-1	1	20	555	574	UCGGACCAGGCUUCAUUCCC	::.:::::::::::::::.	UGGGAUGAAGCCUGGUCCGG	Cleavage	locus=Chr08:11066706:11074546:-	1
zma-miR166f	DACA015342	1	-1	1	20	570	589	UCGGACCAGGCUUCAUUCCC	::.:::::::::::::::.	CGGGAUGAAGCCUGGUCCGG	Cleavage	locus=Chr07:24317952:24325668:-	1
zma-miR166f	DACA002429	1	-1	1	20	570	589	UCGGACCAGGCUUCAUUCCC	::.:::::::::::::::.	CGGGAUGAAGCCUGGUCCGG	Cleavage	locus=Chr11:16707398:16716252:-	1
zma-miR166f	DACA002672	1	-1	1	20	555	574	UCGGACCAGGCUUCAUUCCC	::.:::::::::::::::.	UGGGAUGAAGCCUGGUCCGG	Cleavage	locus=Chr07:12662273:12669644:-	1
zma-miR166f	DACA022171	1	-1	1	20	540	559	UCGGACCAGGCUUCAUUCCC	::.:::::::::::::::.	UGGGAUGAAGCCUGGUCCGG	Cleavage	locus=Chr02:2486221:2491454:+	1
zma-miR166g-3p	DACA015668	1	-1	1	20	555	574	UCGGACCAGGCUUCAUUCCC	::.:::::::::::::::.	UGGGAUGAAGCCUGGUCCGG	Cleavage	locus=Chr08:11066706:11074546:-	1
zma-miR166g-3p	DACA015342	1	-1	1	20	570	589	UCGGACCAGGCUUCAUUCCC	::.:::::::::::::::.	CGGGAUGAAGCCUGGUCCGG	Cleavage	locus=Chr07:24317952:24325668:-	1
zma-miR166g-3p	DACA002429	1	-1	1	20	570	589	UCGGACCAGGCUUCAUUCCC	::.:::::::::::::::.	CGGGAUGAAGCCUGGUCCGG	Cleavage	locus=Chr11:16707398:16716252:-	1
zma-miR166g-3p	DACA002672	1	-1	1	20	555	574	UCGGACCAGGCUUCAUUCCC	::.:::::::::::::::.	UGGGAUGAAGCCUGGUCCGG	Cleavage	locus=Chr07:12662273:12669644:-	1
zma-miR166g-3p	DACA022171	1	-1	1	20	540	559	UCGGACCAGGCUUCAUUCCC	::.:::::::::::::::.	UGGGAUGAAGCCUGGUCCGG	Cleavage	locus=Chr02:2486221:2491454:+	1
zma-miR166h-3p	DACA015668	1	-1	1	20	555	574	UCGGACCAGGCUUCAUUCCC	::.:::::::::::::::.	UGGGAUGAAGCCUGGUCCGG	Cleavage	locus=Chr08:11066706:11074546:-	1
zma-miR166h-3p	DACA002429	1	-1	1	20	570	589	UCGGACCAGGCUUCAUUCCC	::.:::::::::::::::.	CGGGAUGAAGCCUGGUCCGG	Cleavage	locus=Chr11:16707398:16716252:-	1
zma-miR166h-3p	DACA002672	1	-1	1	20	555	574	UCGGACCAGGCUUCAUUCCC	::.:::::::::::::::.	UGGGAUGAAGCCUGGUCCGG	Cleavage	locus=Chr07:12662273:12669644:-	1
zma-miR166h-3p	DACA015342	1	-1	1	20	570	589	UCGGACCAGGCUUCAUUCCC	::.:::::::::::::::.	CGGGAUGAAGCCUGGUCCGG	Cleavage	locus=Chr07:24317952:24325668:-	1
zma-miR166h-3p	DACA022171	1	-1	1	20	540	559	UCGGACCAGGCUUCAUUCCC	::.:::::::::::::::.	UGGGAUGAAGCCUGGUCCGG	Cleavage	locus=Chr02:2486221:2491454:+	1
zma-miR166i-3p	DACA015342	1	-1	1	20	570	589	UCGGACCAGGCUUCAUUCCC	::.:::::::::::::::.	CGGGAUGAAGCCUGGUCCGG	Cleavage	locus=Chr07:24317952:24325668:-	1
zma-miR166i-3p	DACA002429	1	-1	1	20	570	589	UCGGACCAGGCUUCAUUCCC	::.:::::::::::::::.	CGGGAUGAAGCCUGGUCCGG	Cleavage	locus=Chr11:16707398:16716252:-	1
zma-miR166i-3p	DACA002672	1	-1	1	20	555	574	UCGGACCAGGCUUCAUUCCC	::.:::::::::::::::.	UGGGAUGAAGCCUGGUCCGG	Cleavage	locus=Chr07:12662273:12669644:-	1
zma-miR166i-3p	DACA022171	1	-1	1	20	540	559	UCGGACCAGGCUUCAUUCCC	::.:::::::::::::::.	UGGGAUGAAGCCUGGUCCGG	Cleavage	locus=Chr02:2486221:2491454:+	1
zma-miR166i-3p	DACA015668	1	-1	1	20	555	574	UCGGACCAGGCUUCAUUCCC	::.:::::::::::::::.	UGGGAUGAAGCCUGGUCCGG	Cleavage	locus=Chr08:11066706:11074546:-	1
zma-miR166l-3p	DACA002672	1	-1	1	21	554	574	UCGGACCAGGCUUCAUUCCUC	::.:::::::::::::::.	CUGGGAUGAAGCCUGGUCCGG	Cleavage	locus=Chr07:12662273:12669644:-	1
zma-miR166l-3p	DACA022171	1	-1	1	21	539	559	UCGGACCAGGCUUCAUUCCUC	::.:::::::::::::::.	UUGGGAUGAAGCCUGGUCCGG	Cleavage	locus=Chr02:2486221:2491454:+	1
zma-miR166l-3p	DACA015668	1	-1	1	21	554	574	UCGGACCAGGCUUCAUUCCUC	::.:::::::::::::::.	CUGGGAUGAAGCCUGGUCCGG	Cleavage	locus=Chr08:11066706:11074546:-	1
zma-miR166l-3p	DACA015342	1	-1	1	21	569	589	UCGGACCAGGCUUCAUUCCUC	::.:::::::::::::::.	CCGGGAUGAAGCCUGGUCCGG	Cleavage	locus=Chr07:24317952:24325668:-	1
zma-miR166l-3p	DACA002429	1	-1	1	21	569	589	UCGGACCAGGCUUCAUUCCUC	::.:::::::::::::::.	CCGGGAUGAAGCCUGGUCCGG	Cleavage	locus=Chr11:16707398:16716252:-	1
zma-miR166m-3p	DACA015342	1	-1	1	21	569	589	UCGGACCAGGCUUCAUUCCUC	::.:::::::::::::::.	CCGGGAUGAAGCCUGGUCCGG	Cleavage	locus=Chr07:24317952:24325668:-	1
zma-miR166m-3p	DACA002429	1	-1	1	21	569	589	UCGGACCAGGCUUCAUUCCUC	::.:::::::::::::::.	CCGGGAUGAAGCCUGGUCCGG	Cleavage	locus=Chr11:16707398:16716252:-	1
zma-miR166m-3p	DACA002672	1	-1	1	21	554	574	UCGGACCAGGCUUCAUUCCUC	::.:::::::::::::::.	CUGGGAUGAAGCCUGGUCCGG	Cleavage	locus=Chr07:12662273:12669644:-	1
zma-miR166m-3p	DACA022171	1	-1	1	21	539	559	UCGGACCAGGCUUCAUUCCUC	::.:::::::::::::::.	UUGGGAUGAAGCCUGGUCCGG	Cleavage	locus=Chr02:2486221:2491454:+	1
zma-miR166m-3p	DACA015668	1	-1	1	21	554	574	UCGGACCAGGCUUCAUUCCUC	::.:::::::::::::::.	CUGGGAUGAAGCCUGGUCCGG	Cleavage	locus=Chr08:11066706:11074546:-	1
cme-miR166i	DACA015668	1.5	-1	1	20	555	574	UCGGACCAGGCUUCAUUCUC	.:.:::::::::::::::.	UGGGAUGAAGCCUGGUCCGG	Cleavage	locus=Chr08:11066706:11074546:-	1
cme-miR166i	DACA015342	1.5	-1	1	20	570	589	UCGGACCAGGCUUCAUUCUC	.:.:::::::::::::::.	CGGGAUGAAGCCUGGUCCGG	Cleavage	locus=Chr07:24317952:24325668:-	1
cme-miR166i	DACA002429	1.5	-1	1	20	570	589	UCGGACCAGGCUUCAUUCUC	.:.:::::::::::::::.	CGGGAUGAAGCCUGGUCCGG	Cleavage	locus=Chr11:16707398:16716252:-	1
cme-miR166i	DACA002672	1.5	-1	1	20	555	574	UCGGACCAGGCUUCAUUCUC	.:.:::::::::::::::.	UGGGAUGAAGCCUGGUCCGG	Cleavage	locus=Chr07:12662273:12669644:-	1
cme-miR166i	DACA022171	1.5	-1	1	20	540	559	UCGGACCAGGCUUCAUUCUC	.:.:::::::::::::::.	UGGGAUGAAGCCUGGUCCGG	Cleavage	locus=Chr02:2486221:2491454:+	1
gma-miR166m	DACA015668	1.5	-1	1	20	554	573	CGGACCAGGCUUCAUUCCCC	::.:::::::::::::::	CUGGGAUGAAGCCUGGUCCG	Cleavage	locus=Chr08:11066706:11074546:-	1
gma-miR166m	DACA015342	1.5	-1	1	20	569	588	CGGACCAGGCUUCAUUCCCC	::.:::::::::::::::	CCGGGAUGAAGCCUGGUCCG	Cleavage	locus=Chr07:24317952:24325668:-	1
gma-miR166m	DACA002429	1.5	-1	1	20	569	588	CGGACCAGGCUUCAUUCCCC	::.:::::::::::::::	CCGGGAUGAAGCCUGGUCCG	Cleavage	locus=Chr11:16707398:16716252:-	1
gma-miR166m	DACA022171	1.5	-1	1	20	539	558	CGGACCAGGCUUCAUUCCCC	::.:::::::::::::::	UUGGGAUGAAGCCUGGUCCG	Cleavage	locus=Chr02:2486221:2491454:+	1
gma-miR166m	DACA002672	1.5	-1	1	20	554	573	CGGACCAGGCUUCAUUCCCC	::.:::::::::::::::	CUGGGAUGAAGCCUGGUCCG	Cleavage	locus=Chr07:12662273:12669644:-	1
mes-miR166i	DACA022171	1.5	-1	1	21	539	559	UUGGACCAGGCUUCAUUCCCC	::.::::::::::::::..	UUGGGAUGAAGCCUGGUCCGG	Cleavage	locus=Chr02:2486221:2491454:+	1
mes-miR166i	DACA015342	1.5	-1	1	21	569	589	UUGGACCAGGCUUCAUUCCCC	::.::::::::::::::..	CCGGGAUGAAGCCUGGUCCGG	Cleavage	locus=Chr07:24317952:24325668:-	1
mes-miR166i	DACA002429	1.5	-1	1	21	569	589	UUGGACCAGGCUUCAUUCCCC	::.::::::::::::::..	CCGGGAUGAAGCCUGGUCCGG	Cleavage	locus=Chr11:16707398:16716252:-	1
mes-miR166i	DACA002672	1.5	-1	1	21	554	574	UUGGACCAGGCUUCAUUCCCC	::.::::::::::::::..	CUGGGAUGAAGCCUGGUCCGG	Cleavage	locus=Chr07:12662273:12669644:-	1
mes-miR166i	DACA015668	1.5	-1	1	21	554	574	UUGGACCAGGCUUCAUUCCCC	::.::::::::::::::..	CUGGGAUGAAGCCUGGUCCGG	Cleavage	locus=Chr08:11066706:11074546:-	1
mtr-miR2673a	DACA012489	1.5	-1	1	22	283	304	CCUCUUCCUCUUCCUCUUCCAC	: :::::::::.:::::.:.::	GAGGAAGAGGAGGAGGAGGGGG	Cleavage	locus=Chr04:27666731:27668717:+	1
mtr-miR2673b	DACA012489	1.5	-1	1	22	283	304	CCUCUUCCUCUUCCUCUUCCAC	: :::::::::.:::::.:.::	GAGGAAGAGGAGGAGGAGGGGG	Cleavage	locus=Chr04:27666731:27668717:+	1
osa-miR166i-3p	DACA015342	1.5	-1	1	21	569	589	UCGGAUCAGGCUUCAUUCCUC	::.::::::::::.::::.	CCGGGAUGAAGCCUGGUCCGG	Cleavage	locus=Chr07:24317952:24325668:-	1
osa-miR166i-3p	DACA002429	1.5	-1	1	21	569	589	UCGGAUCAGGCUUCAUUCCUC	::.::::::::::.::::.	CCGGGAUGAAGCCUGGUCCGG	Cleavage	locus=Chr11:16707398:16716252:-	1
osa-miR166i-3p	DACA022171	1.5	-1	1	21	539	559	UCGGAUCAGGCUUCAUUCCUC	::.::::::::::.::::.	UUGGGAUGAAGCCUGGUCCGG	Cleavage	locus=Chr02:2486221:2491454:+	1
osa-miR166i-3p	DACA002672	1.5	-1	1	21	554	574	UCGGAUCAGGCUUCAUUCCUC	::.::::::::::.::::.	CUGGGAUGAAGCCUGGUCCGG	Cleavage	locus=Chr07:12662273:12669644:-	1
osa-miR166i-3p	DACA015668	1.5	-1	1	21	554	574	UCGGAUCAGGCUUCAUUCCUC	::.::::::::::.::::.	CUGGGAUGAAGCCUGGUCCGG	Cleavage	locus=Chr08:11066706:11074546:-	1
ata-miR5168-3p	DACA015668	2	-1	1	21	554	574	UCGGACCAGGCUUCAAUCCCU	::. ::::::::::::::.	CUGGGAUGAAGCCUGGUCCGG	Cleavage	locus=Chr08:11066706:11074546:-	1
ata-miR5168-3p	DACA015342	2	-1	1	21	569	589	UCGGACCAGGCUUCAAUCCCU	::. ::::::::::::::.	CCGGGAUGAAGCCUGGUCCGG	Cleavage	locus=Chr07:24317952:24325668:-	1
ata-miR5168-3p	DACA002429	2	-1	1	21	569	589	UCGGACCAGGCUUCAAUCCCU	::. ::::::::::::::.	CCGGGAUGAAGCCUGGUCCGG	Cleavage	locus=Chr11:16707398:16716252:-	1
ata-miR5168-3p	DACA022171	2	-1	1	21	539	559	UCGGACCAGGCUUCAAUCCCU	::. ::::::::::::::.	UUGGGAUGAAGCCUGGUCCGG	Cleavage	locus=Chr02:2486221:2491454:+	1
ata-miR5168-3p	DACA002672	2	-1	1	21	554	574	UCGGACCAGGCUUCAAUCCCU	::. ::::::::::::::.	CUGGGAUGAAGCCUGGUCCGG	Cleavage	locus=Chr07:12662273:12669644:-	1
bdi-miR166e-3p	DACA015342	2	-1	1	21	570	590	CUCGGACCAGGCUUCAUUCCC	::.:::::::::::::::.	CGGGAUGAAGCCUGGUCCGGA	Cleavage	locus=Chr07:24317952:24325668:-	1
bdi-miR166e-3p	DACA002429	2	-1	1	21	570	590	CUCGGACCAGGCUUCAUUCCC	::.:::::::::::::::.	CGGGAUGAAGCCUGGUCCGGA	Cleavage	locus=Chr11:16707398:16716252:-	1
bdi-miR166e-3p	DACA022171	2	-1	1	21	540	560	CUCGGACCAGGCUUCAUUCCC	::.:::::::::::::::.	UGGGAUGAAGCCUGGUCCGGA	Cleavage	locus=Chr02:2486221:2491454:+	1
bdi-miR166e-3p	DACA015668	2	-1	1	21	555	575	CUCGGACCAGGCUUCAUUCCC	::.:::::::::::::::.	UGGGAUGAAGCCUGGUCCGGA	Cleavage	locus=Chr08:11066706:11074546:-	1
bdi-miR166e-3p	DACA002672	2	-1	1	21	555	575	CUCGGACCAGGCUUCAUUCCC	::.:::::::::::::::.	UGGGAUGAAGCCUGGUCCGGA	Cleavage	locus=Chr07:12662273:12669644:-	1
bdi-miR166h-3p	DACA022171	2	-1	1	21	539	559	UCGGACCAGGCUUCAAUCCCU	::. ::::::::::::::.	UUGGGAUGAAGCCUGGUCCGG	Cleavage	locus=Chr02:2486221:2491454:+	1
bdi-miR166h-3p	DACA002672	2	-1	1	21	554	574	UCGGACCAGGCUUCAAUCCCU	::. ::::::::::::::.	CUGGGAUGAAGCCUGGUCCGG	Cleavage	locus=Chr07:12662273:12669644:-	1
bdi-miR166h-3p	DACA015342	2	-1	1	21	569	589	UCGGACCAGGCUUCAAUCCCU	::. ::::::::::::::.	CCGGGAUGAAGCCUGGUCCGG	Cleavage	locus=Chr07:24317952:24325668:-	1
bdi-miR166h-3p	DACA002429	2	-1	1	21	569	589	UCGGACCAGGCUUCAAUCCCU	::. ::::::::::::::.	CCGGGAUGAAGCCUGGUCCGG	Cleavage	locus=Chr11:16707398:16716252:-	1
bdi-miR166h-3p	DACA015668	2	-1	1	21	554	574	UCGGACCAGGCUUCAAUCCCU	::. ::::::::::::::.	CUGGGAUGAAGCCUGGUCCGG	Cleavage	locus=Chr08:11066706:11074546:-	1
gra-miR8668	DACA008865	2	-1	1	20	457	476	UUUUGGAAUCAAGACUACAU	.:: :::.:::.::::::::	GUGAAGUUUUGGUUCCAAAA	Cleavage	locus=Chr10:9714453:9720437:+	1
osa-miR166k-3p	DACA022171	2	-1	1	21	539	559	UCGGACCAGGCUUCAAUCCCU	::. ::::::::::::::.	UUGGGAUGAAGCCUGGUCCGG	Cleavage	locus=Chr02:2486221:2491454:+	1
osa-miR166k-3p	DACA015668	2	-1	1	21	554	574	UCGGACCAGGCUUCAAUCCCU	::. ::::::::::::::.	CUGGGAUGAAGCCUGGUCCGG	Cleavage	locus=Chr08:11066706:11074546:-	1
osa-miR166k-3p	DACA002429	2	-1	1	21	569	589	UCGGACCAGGCUUCAAUCCCU	::. ::::::::::::::.	CCGGGAUGAAGCCUGGUCCGG	Cleavage	locus=Chr11:16707398:16716252:-	1
osa-miR166k-3p	DACA002672	2	-1	1	21	554	574	UCGGACCAGGCUUCAAUCCCU	::. ::::::::::::::.	CUGGGAUGAAGCCUGGUCCGG	Cleavage	locus=Chr07:12662273:12669644:-	1
osa-miR166k-3p	DACA015342	2	-1	1	21	569	589	UCGGACCAGGCUUCAAUCCCU	::. ::::::::::::::.	CCGGGAUGAAGCCUGGUCCGG	Cleavage	locus=Chr07:24317952:24325668:-	1
osa-miR166l-3p	DACA002429	2	-1	1	21	569	589	UCGGACCAGGCUUCAAUCCCU	::. ::::::::::::::.	CCGGGAUGAAGCCUGGUCCGG	Cleavage	locus=Chr11:16707398:16716252:-	1
osa-miR166l-3p	DACA022171	2	-1	1	21	539	559	UCGGACCAGGCUUCAAUCCCU	::. ::::::::::::::.	UUGGGAUGAAGCCUGGUCCGG	Cleavage	locus=Chr02:2486221:2491454:+	1
osa-miR166l-3p	DACA002672	2	-1	1	21	554	574	UCGGACCAGGCUUCAAUCCCU	::. ::::::::::::::.	CUGGGAUGAAGCCUGGUCCGG	Cleavage	locus=Chr07:12662273:12669644:-	1
osa-miR166l-3p	DACA015668	2	-1	1	21	554	574	UCGGACCAGGCUUCAAUCCCU	::. ::::::::::::::.	CUGGGAUGAAGCCUGGUCCGG	Cleavage	locus=Chr08:11066706:11074546:-	1
osa-miR166l-3p	DACA015342	2	-1	1	21	569	589	UCGGACCAGGCUUCAAUCCCU	::. ::::::::::::::.	CCGGGAUGAAGCCUGGUCCGG	Cleavage	locus=Chr07:24317952:24325668:-	1
sbi-miR166e	DACA015668	2	-1	1	21	554	574	UCGGACCAGGCUUCAAUCCCU	::. ::::::::::::::.	CUGGGAUGAAGCCUGGUCCGG	Cleavage	locus=Chr08:11066706:11074546:-	1
sbi-miR166e	DACA015342	2	-1	1	21	569	589	UCGGACCAGGCUUCAAUCCCU	::. ::::::::::::::.	CCGGGAUGAAGCCUGGUCCGG	Cleavage	locus=Chr07:24317952:24325668:-	1
sbi-miR166e	DACA002429	2	-1	1	21	569	589	UCGGACCAGGCUUCAAUCCCU	::. ::::::::::::::.	CCGGGAUGAAGCCUGGUCCGG	Cleavage	locus=Chr11:16707398:16716252:-	1
sbi-miR166e	DACA002672	2	-1	1	21	554	574	UCGGACCAGGCUUCAAUCCCU	::. ::::::::::::::.	CUGGGAUGAAGCCUGGUCCGG	Cleavage	locus=Chr07:12662273:12669644:-	1
sbi-miR166e	DACA022171	2	-1	1	21	539	559	UCGGACCAGGCUUCAAUCCCU	::. ::::::::::::::.	UUGGGAUGAAGCCUGGUCCGG	Cleavage	locus=Chr02:2486221:2491454:+	1
sbi-miR166g	DACA015668	2	-1	1	21	554	574	UCGGACCAGGCUUCAAUCCCU	::. ::::::::::::::.	CUGGGAUGAAGCCUGGUCCGG	Cleavage	locus=Chr08:11066706:11074546:-	1
sbi-miR166g	DACA015342	2	-1	1	21	569	589	UCGGACCAGGCUUCAAUCCCU	::. ::::::::::::::.	CCGGGAUGAAGCCUGGUCCGG	Cleavage	locus=Chr07:24317952:24325668:-	1
sbi-miR166g	DACA002429	2	-1	1	21	569	589	UCGGACCAGGCUUCAAUCCCU	::. ::::::::::::::.	CCGGGAUGAAGCCUGGUCCGG	Cleavage	locus=Chr11:16707398:16716252:-	1
sbi-miR166g	DACA002672	2	-1	1	21	554	574	UCGGACCAGGCUUCAAUCCCU	::. ::::::::::::::.	CUGGGAUGAAGCCUGGUCCGG	Cleavage	locus=Chr07:12662273:12669644:-	1
sbi-miR166g	DACA022171	2	-1	1	21	539	559	UCGGACCAGGCUUCAAUCCCU	::. ::::::::::::::.	UUGGGAUGAAGCCUGGUCCGG	Cleavage	locus=Chr02:2486221:2491454:+	1
tae-miR1130a	DACA023137	2	-1	1	23	741	763	CCUCCGUCUCGUAAUGUAAGACG	:: : :::::.::::.::::::	CGAGUCACAUUGCGAGGCGGAGG	Cleavage	locus=Chr08:784609:787172:-	1
zma-miR166j-3p	DACA015668	2	-1	1	21	554	574	UCGGACCAGGCUUCAAUCCCU	::. ::::::::::::::.	CUGGGAUGAAGCCUGGUCCGG	Cleavage	locus=Chr08:11066706:11074546:-	1
zma-miR166j-3p	DACA015342	2	-1	1	21	569	589	UCGGACCAGGCUUCAAUCCCU	::. ::::::::::::::.	CCGGGAUGAAGCCUGGUCCGG	Cleavage	locus=Chr07:24317952:24325668:-	1
zma-miR166j-3p	DACA022171	2	-1	1	21	539	559	UCGGACCAGGCUUCAAUCCCU	::. ::::::::::::::.	UUGGGAUGAAGCCUGGUCCGG	Cleavage	locus=Chr02:2486221:2491454:+	1
zma-miR166j-3p	DACA002672	2	-1	1	21	554	574	UCGGACCAGGCUUCAAUCCCU	::. ::::::::::::::.	CUGGGAUGAAGCCUGGUCCGG	Cleavage	locus=Chr07:12662273:12669644:-	1
zma-miR166j-3p	DACA002429	2	-1	1	21	569	589	UCGGACCAGGCUUCAAUCCCU	::. ::::::::::::::.	CCGGGAUGAAGCCUGGUCCGG	Cleavage	locus=Chr11:16707398:16716252:-	1
zma-miR166k-3p	DACA015342	2	-1	1	21	569	589	UCGGACCAGGCUUCAAUCCCU	::. ::::::::::::::.	CCGGGAUGAAGCCUGGUCCGG	Cleavage	locus=Chr07:24317952:24325668:-	1
zma-miR166k-3p	DACA022171	2	-1	1	21	539	559	UCGGACCAGGCUUCAAUCCCU	::. ::::::::::::::.	UUGGGAUGAAGCCUGGUCCGG	Cleavage	locus=Chr02:2486221:2491454:+	1
zma-miR166k-3p	DACA002672	2	-1	1	21	554	574	UCGGACCAGGCUUCAAUCCCU	::. ::::::::::::::.	CUGGGAUGAAGCCUGGUCCGG	Cleavage	locus=Chr07:12662273:12669644:-	1
zma-miR166k-3p	DACA015668	2	-1	1	21	554	574	UCGGACCAGGCUUCAAUCCCU	::. ::::::::::::::.	CUGGGAUGAAGCCUGGUCCGG	Cleavage	locus=Chr08:11066706:11074546:-	1
zma-miR166k-3p	DACA002429	2	-1	1	21	569	589	UCGGACCAGGCUUCAAUCCCU	::. ::::::::::::::.	CCGGGAUGAAGCCUGGUCCGG	Cleavage	locus=Chr11:16707398:16716252:-	1
zma-miR166n-3p	DACA015668	2	-1	1	21	554	574	UCGGACCAGGCUUCAAUCCCU	::. ::::::::::::::.	CUGGGAUGAAGCCUGGUCCGG	Cleavage	locus=Chr08:11066706:11074546:-	1
zma-miR166n-3p	DACA002429	2	-1	1	21	569	589	UCGGACCAGGCUUCAAUCCCU	::. ::::::::::::::.	CCGGGAUGAAGCCUGGUCCGG	Cleavage	locus=Chr11:16707398:16716252:-	1
zma-miR166n-3p	DACA002672	2	-1	1	21	554	574	UCGGACCAGGCUUCAAUCCCU	::. ::::::::::::::.	CUGGGAUGAAGCCUGGUCCGG	Cleavage	locus=Chr07:12662273:12669644:-	1
zma-miR166n-3p	DACA022171	2	-1	1	21	539	559	UCGGACCAGGCUUCAAUCCCU	::. ::::::::::::::.	UUGGGAUGAAGCCUGGUCCGG	Cleavage	locus=Chr02:2486221:2491454:+	1
zma-miR166n-3p	DACA015342	2	-1	1	21	569	589	UCGGACCAGGCUUCAAUCCCU	::. ::::::::::::::.	CCGGGAUGAAGCCUGGUCCGG	Cleavage	locus=Chr07:24317952:24325668:-	1
aly-miR4244	DACA005525	2.5	-1	1	21	1019	1039	UUGUUGAUUCCUUGGAGAUUG	: ::::::::::::::: ::	CUAUCUCCAAGGAAUCAUCAU	Cleavage	locus=Chr12:8111140:8126508:-	1
ath-miR5665	DACA002672	2.5	-1	1	21	1967	1987	UUGGUGGACAAGAUCUGGGAU	:::..:::.::::::::::	CUCCUGGAUUUUGUCCACCAC	Cleavage	locus=Chr07:12662273:12669644:-	1
cpa-miR166e	DACA002429	2.5	-1	1	19	569	587	GGACCAGGCUUCAUUCCCC	::.::::::::::::::	CCGGGAUGAAGCCUGGUCC	Cleavage	locus=Chr11:16707398:16716252:-	1
cpa-miR166e	DACA015668	2.5	-1	1	19	554	572	GGACCAGGCUUCAUUCCCC	::.::::::::::::::	CUGGGAUGAAGCCUGGUCC	Cleavage	locus=Chr08:11066706:11074546:-	1
cpa-miR166e	DACA002672	2.5	-1	1	19	554	572	GGACCAGGCUUCAUUCCCC	::.::::::::::::::	CUGGGAUGAAGCCUGGUCC	Cleavage	locus=Chr07:12662273:12669644:-	1
cpa-miR166e	DACA015342	2.5	-1	1	19	569	587	GGACCAGGCUUCAUUCCCC	::.::::::::::::::	CCGGGAUGAAGCCUGGUCC	Cleavage	locus=Chr07:24317952:24325668:-	1
cpa-miR166e	DACA022171	2.5	-1	1	19	539	557	GGACCAGGCUUCAUUCCCC	::.::::::::::::::	UUGGGAUGAAGCCUGGUCC	Cleavage	locus=Chr02:2486221:2491454:+	1
cre-miR906-5p	DACA023137	2.5	-1	1	21	196	216	CGGUUGGUGGGCGUGAUCAGC	: ::: ..:::::::::.:::	GAUGAGUGCGCCCACCAGCCG	Cleavage	locus=Chr08:784609:787172:-	1
gma-miR390b-5p	DACA005525	2.5	-1	1	21	3010	3030	AAGCUCAGGAGGGAUAGCACC	::::: ::.:.::.:::::::	GGUGCCAUUCUUCUUGAGCUU	Cleavage	locus=Chr12:8111140:8126508:-	1
gma-miR390d	DACA005525	2.5	-1	1	21	3010	3030	AAGCUCAGGAGGGAUAGCACC	::::: ::.:.::.:::::::	GGUGCCAUUCUUCUUGAGCUU	Cleavage	locus=Chr12:8111140:8126508:-	1
gma-miR5041-5p	DACA000927	2.5	-1	1	21	458	477	UUUCAUCUUCAACUUGCUCAA	: ::::: ::::::::::.::	UGGAGCA-GUUGAAGAUGGAA	Cleavage	locus=Chr10:17698392:17699669:-	1
gra-miR8786a	DACA015342	2.5	-1	1	24	1468	1491	UUUUAGUGAUGUGGCAGAAAGAUG	:. ::::::..::::::: :::	GCUUAUUCUGCUGCAUCACUCAAA	Cleavage	locus=Chr07:24317952:24325668:-	1
gra-miR8786a	DACA002429	2.5	-1	1	24	1468	1491	UUUUAGUGAUGUGGCAGAAAGAUG	:. ::::::..::::::: :::	GCUUAUUCUGCUGCAUCACUCAAA	Cleavage	locus=Chr11:16707398:16716252:-	1
gra-miR8786b	DACA002429	2.5	-1	1	24	1468	1491	UUUUAGUGAUGUGGCAGAAAGAUG	:. ::::::..::::::: :::	GCUUAUUCUGCUGCAUCACUCAAA	Cleavage	locus=Chr11:16707398:16716252:-	1
gra-miR8786b	DACA015342	2.5	-1	1	24	1468	1491	UUUUAGUGAUGUGGCAGAAAGAUG	:. ::::::..::::::: :::	GCUUAUUCUGCUGCAUCACUCAAA	Cleavage	locus=Chr07:24317952:24325668:-	1
mtr-miR2673a	DACA001730	2.5	-1	1	22	102	123	CCUCUUCCUCUUCCUCUUCCAC	: :::.::: :::::::::.::	GAGGAGGAGAAAGAGGAAGGGG	Cleavage	locus=Chr03:13773813:13775310:+	1
mtr-miR2673b	DACA001730	2.5	-1	1	22	102	123	CCUCUUCCUCUUCCUCUUCCAC	: :::.::: :::::::::.::	GAGGAGGAGAAAGAGGAAGGGG	Cleavage	locus=Chr03:13773813:13775310:+	1
nta-miR390a	DACA005525	2.5	-1	1	21	3010	3030	AAGCUCAGGAGGGAUAGCACC	::::: ::.:.::.:::::::	GGUGCCAUUCUUCUUGAGCUU	Cleavage	locus=Chr12:8111140:8126508:-	1
osa-miR166e-3p	DACA015668	2.5	-1	1	21	554	574	UCGAACCAGGCUUCAUUCCCC	::.:::::::::::: ::.	CUGGGAUGAAGCCUGGUCCGG	Cleavage	locus=Chr08:11066706:11074546:-	1
osa-miR166e-3p	DACA015342	2.5	-1	1	21	569	589	UCGAACCAGGCUUCAUUCCCC	::.:::::::::::: ::.	CCGGGAUGAAGCCUGGUCCGG	Cleavage	locus=Chr07:24317952:24325668:-	1
osa-miR166e-3p	DACA002429	2.5	-1	1	21	569	589	UCGAACCAGGCUUCAUUCCCC	::.:::::::::::: ::.	CCGGGAUGAAGCCUGGUCCGG	Cleavage	locus=Chr11:16707398:16716252:-	1
osa-miR166e-3p	DACA022171	2.5	-1	1	21	539	559	UCGAACCAGGCUUCAUUCCCC	::.:::::::::::: ::.	UUGGGAUGAAGCCUGGUCCGG	Cleavage	locus=Chr02:2486221:2491454:+	1
osa-miR166e-3p	DACA002672	2.5	-1	1	21	554	574	UCGAACCAGGCUUCAUUCCCC	::.:::::::::::: ::.	CUGGGAUGAAGCCUGGUCCGG	Cleavage	locus=Chr07:12662273:12669644:-	1
osa-miR413	DACA010840	2.5	-1	1	21	1077	1097	CUAGUUUCACUUGUUCUGCAC	::.:::...:::.::::::	AAGCGGAAUGGGUGGAACUAG	Cleavage	locus=Chr04:24213209:24217283:-	1
ppt-miR166m	DACA022171	2.5	-1	1	21	539	559	UCGGACCAGGCAUCAUUCCUU	::.:::: ::::::::::.	UUGGGAUGAAGCCUGGUCCGG	Cleavage	locus=Chr02:2486221:2491454:+	1
ppt-miR166m	DACA002672	2.5	-1	1	21	554	574	UCGGACCAGGCAUCAUUCCUU	::.:::: ::::::::::.	CUGGGAUGAAGCCUGGUCCGG	Cleavage	locus=Chr07:12662273:12669644:-	1
ppt-miR166m	DACA015342	2.5	-1	1	21	569	589	UCGGACCAGGCAUCAUUCCUU	::.:::: ::::::::::.	CCGGGAUGAAGCCUGGUCCGG	Cleavage	locus=Chr07:24317952:24325668:-	1
ppt-miR166m	DACA002429	2.5	-1	1	21	569	589	UCGGACCAGGCAUCAUUCCUU	::.:::: ::::::::::.	CCGGGAUGAAGCCUGGUCCGG	Cleavage	locus=Chr11:16707398:16716252:-	1
ppt-miR166m	DACA015668	2.5	-1	1	21	554	574	UCGGACCAGGCAUCAUUCCUU	::.:::: ::::::::::.	CUGGGAUGAAGCCUGGUCCGG	Cleavage	locus=Chr08:11066706:11074546:-	1
ptc-miR166p	DACA015668	2.5	-1	1	21	554	574	UCGGACCAGGCUCCAUUCCUU	::.::: :::::::::::.	CUGGGAUGAAGCCUGGUCCGG	Cleavage	locus=Chr08:11066706:11074546:-	1
ptc-miR166p	DACA015342	2.5	-1	1	21	569	589	UCGGACCAGGCUCCAUUCCUU	::.::: :::::::::::.	CCGGGAUGAAGCCUGGUCCGG	Cleavage	locus=Chr07:24317952:24325668:-	1
ptc-miR166p	DACA002429	2.5	-1	1	21	569	589	UCGGACCAGGCUCCAUUCCUU	::.::: :::::::::::.	CCGGGAUGAAGCCUGGUCCGG	Cleavage	locus=Chr11:16707398:16716252:-	1
ptc-miR166p	DACA022171	2.5	-1	1	21	539	559	UCGGACCAGGCUCCAUUCCUU	::.::: :::::::::::.	UUGGGAUGAAGCCUGGUCCGG	Cleavage	locus=Chr02:2486221:2491454:+	1
ptc-miR166p	DACA002672	2.5	-1	1	21	554	574	UCGGACCAGGCUCCAUUCCUU	::.::: :::::::::::.	CUGGGAUGAAGCCUGGUCCGG	Cleavage	locus=Chr07:12662273:12669644:-	1
rgl-miR164	DACA009322	2.5	-1	1	21	139	159	UGGGGAAGAAGAGCACAUGAA	: :::: .::::::::::::	AUGAUGUCUUCUUCUUCCCCA	Cleavage	locus=Chr09:14296476:14297507:-	1
sly-miR390a-5p	DACA005525	2.5	-1	1	21	3010	3030	AAGCUCAGGAGGGAUAGCACC	::::: ::.:.::.:::::::	GGUGCCAUUCUUCUUGAGCUU	Cleavage	locus=Chr12:8111140:8126508:-	1
stu-miR390-5p	DACA005525	2.5	-1	1	21	3010	3030	AAGCUCAGGAGGGAUAGCACC	::::: ::.:.::.:::::::	GGUGCCAUUCUUCUUGAGCUU	Cleavage	locus=Chr12:8111140:8126508:-	1
tae-miR5048-5p	DACA008865	2.5	-1	1	22	1046	1067	UUUGCAGGUUUUAGGUCUAAGU	:.::.:::::.::::..::	CUAUGGAUCUAAAGCCUGUGAA	Cleavage	locus=Chr10:9714453:9720437:+	1
zma-miR395k-3p	DACA005525	2.5	-1	1	21	1519	1539	GUGAAGUGUUUGAGGAAACUC	:::::: :::::.::.::::.	GAGUUUGCUCAAGCAUUUCAU	Cleavage	locus=Chr12:8111140:8126508:-	1
aly-miR172d-5p	DACA015668	3	-1	1	21	2207	2227	GCAACAUCUUCAAGAUUCAGA	::: ::::::::::::::	GCUGCUCCUUGAAGAUGUUGC	Cleavage	locus=Chr08:11066706:11074546:-	1
aly-miR3447-3p	DACA018179	3	-1	1	21	425	445	UUUGAGUGUGUUUGUUAUGAA	: :: :::::::.::: ::::	UCCAAAACAAACGCACCCAAA	Cleavage	locus=Chr01:14603431:14609298:+	1
aly-miR390a-5p	DACA005525	3	-1	1	21	3010	3030	AAGCUCAGGAGGGAUAGCGCC	::.:: ::.:.::.:::::::	GGUGCCAUUCUUCUUGAGCUU	Cleavage	locus=Chr12:8111140:8126508:-	1
aly-miR390b-5p	DACA005525	3	-1	1	21	3010	3030	AAGCUCAGGAGGGAUAGCGCC	::.:: ::.:.::.:::::::	GGUGCCAUUCUUCUUGAGCUU	Cleavage	locus=Chr12:8111140:8126508:-	1
aly-miR838-3p	DACA009322	3	-1	1	21	453	473	UUUUCUUCUUCUUCUUGCACA	:: .:::::::::::.::	GAUGAUGGAAGAAGAAGAGAA	Cleavage	locus=Chr09:14296476:14297507:-	1
ata-miR2275b-3p	DACA015342	3	-1	1	22	318	339	CUUGUUUUCCUCCAAUAUCUCA	: :. :::::::::::.::	GCUGUUGAUGGAGGAAAACGAG	Cleavage	locus=Chr07:24317952:24325668:-	1
ata-miR390-5p	DACA005525	3	-1	1	21	3010	3030	AAGCUCAGGAGGGAUAGCGCC	::.:: ::.:.::.:::::::	GGUGCCAUUCUUCUUGAGCUU	Cleavage	locus=Chr12:8111140:8126508:-	1
ata-miR395a-3p	DACA005525	3	-1	1	20	1519	1538	UGAAGUGUUUGGGGGAACUC	:::::. :.:::.::.::::	GAGUUUGCUCAAGCAUUUCA	Cleavage	locus=Chr12:8111140:8126508:-	1
ata-miR395c-3p	DACA005525	3	-1	1	20	1519	1538	UGAAGUGUUUGGGGGAACUC	:::::. :.:::.::.::::	GAGUUUGCUCAAGCAUUUCA	Cleavage	locus=Chr12:8111140:8126508:-	1
ata-miR395d-3p	DACA005525	3	-1	1	20	1519	1538	UGAAGUGUUUGGGGGAACUC	:::::. :.:::.::.::::	GAGUUUGCUCAAGCAUUUCA	Cleavage	locus=Chr12:8111140:8126508:-	1
ata-miR395e-3p	DACA005525	3	-1	1	20	1519	1538	UGAAGUGUUUGGGGGAACUC	:::::. :.:::.::.::::	GAGUUUGCUCAAGCAUUUCA	Cleavage	locus=Chr12:8111140:8126508:-	1
ata-miR395f-3p	DACA005525	3	-1	1	20	1519	1538	UGAAGUGUUUGGGGGAACUC	:::::. :.:::.::.::::	GAGUUUGCUCAAGCAUUUCA	Cleavage	locus=Chr12:8111140:8126508:-	1
ath-miR172d-5p	DACA015668	3	-1	1	21	2207	2227	GCAACAUCUUCAAGAUUCAGA	::: ::::::::::::::	GCUGCUCCUUGAAGAUGUUGC	Cleavage	locus=Chr08:11066706:11074546:-	1
ath-miR390a-5p	DACA005525	3	-1	1	21	3010	3030	AAGCUCAGGAGGGAUAGCGCC	::.:: ::.:.::.:::::::	GGUGCCAUUCUUCUUGAGCUU	Cleavage	locus=Chr12:8111140:8126508:-	1
ath-miR390b-5p	DACA005525	3	-1	1	21	3010	3030	AAGCUCAGGAGGGAUAGCGCC	::.:: ::.:.::.:::::::	GGUGCCAUUCUUCUUGAGCUU	Cleavage	locus=Chr12:8111140:8126508:-	1
ath-miR397b	DACA015668	3	-1	1	21	1200	1220	UCAUUGAGUGCAUCGUUGAUG	:.::.:: ::::::::::.	UUUUAAUGAGGCACUCAAUGG	Cleavage	locus=Chr08:11066706:11074546:-	1
ath-miR414	DACA022106	3	-1	1	21	327	347	UCAUCUUCAUCAUCAUCGUCA	.:::::: ::::::::::	CAGCGAUGAAGAUGAAGAUGU	Cleavage	locus=Chr06:11266475:11267521:-	1
ath-miR4221	DACA012489	3	-1	1	22	618	639	UUUUCCUCUGUUGAAUUCUUGC	::.::::: ..::.:::::.::	GCGAGAAUCUGACGGAGGAGAA	Cleavage	locus=Chr04:27666731:27668717:+	1
ath-miR833b	DACA005525	3	-1	1	21	2423	2443	UGUUUGUUGACAUCGGUCUAG	: :::.: ::::::::::::	CAAGAUCCCUGUCAACAAACA	Cleavage	locus=Chr12:8111140:8126508:-	1
ath-miR859	DACA020352	3	-1	1	21	907	927	UCUCUCUGUUGUGAAGUCAAA	:::. :..::::::::::.	GAUGAUCUUGCAACAGAGAGG	Cleavage	locus=Chr10:503444:504689:-	1
bdi-miR390a-5p	DACA005525	3	-1	1	21	3010	3030	AAGCUCAGGAGGGAUAGCGCC	::.:: ::.:.::.:::::::	GGUGCCAUUCUUCUUGAGCUU	Cleavage	locus=Chr12:8111140:8126508:-	1
bdi-miR395a	DACA005525	3	-1	1	20	1519	1538	UGAAGUGUUUGGGGGAACUC	:::::. :.:::.::.::::	GAGUUUGCUCAAGCAUUUCA	Cleavage	locus=Chr12:8111140:8126508:-	1
bdi-miR395b	DACA005525	3	-1	1	20	1519	1538	UGAAGUGUUUGGGGGAACUC	:::::. :.:::.::.::::	GAGUUUGCUCAAGCAUUUCA	Cleavage	locus=Chr12:8111140:8126508:-	1
bdi-miR395c-3p	DACA005525	3	-1	1	20	1519	1538	UGAAGUGUUUGGGGGAACUC	:::::. :.:::.::.::::	GAGUUUGCUCAAGCAUUUCA	Cleavage	locus=Chr12:8111140:8126508:-	1
bdi-miR395e-3p	DACA005525	3	-1	1	20	1519	1538	UGAAGUGUUUGGGGGAACUC	:::::. :.:::.::.::::	GAGUUUGCUCAAGCAUUUCA	Cleavage	locus=Chr12:8111140:8126508:-	1
bdi-miR395f-3p	DACA005525	3	-1	1	20	1519	1538	UGAAGUGUUUGGGGGAACUC	:::::. :.:::.::.::::	GAGUUUGCUCAAGCAUUUCA	Cleavage	locus=Chr12:8111140:8126508:-	1
bdi-miR395g-3p	DACA005525	3	-1	1	20	1519	1538	UGAAGUGUUUGGGGGAACUC	:::::. :.:::.::.::::	GAGUUUGCUCAAGCAUUUCA	Cleavage	locus=Chr12:8111140:8126508:-	1
bdi-miR395h-3p	DACA005525	3	-1	1	20	1519	1538	UGAAGUGUUUGGGGGAACUC	:::::. :.:::.::.::::	GAGUUUGCUCAAGCAUUUCA	Cleavage	locus=Chr12:8111140:8126508:-	1
bdi-miR395j-3p	DACA005525	3	-1	1	20	1519	1538	UGAAGUGUUUGGGGGAACUC	:::::. :.:::.::.::::	GAGUUUGCUCAAGCAUUUCA	Cleavage	locus=Chr12:8111140:8126508:-	1
bdi-miR395k-3p	DACA005525	3	-1	1	20	1519	1538	UGAAGUGUUUGGGGGAACUC	:::::. :.:::.::.::::	GAGUUUGCUCAAGCAUUUCA	Cleavage	locus=Chr12:8111140:8126508:-	1
bdi-miR395l-3p	DACA005525	3	-1	1	20	1519	1538	UGAAGUGUUUGGGGGAACUC	:::::. :.:::.::.::::	GAGUUUGCUCAAGCAUUUCA	Cleavage	locus=Chr12:8111140:8126508:-	1
bdi-miR395m	DACA005525	3	-1	1	20	1519	1538	UGAAGUGUUUGGGGGAACUC	:::::. :.:::.::.::::	GAGUUUGCUCAAGCAUUUCA	Cleavage	locus=Chr12:8111140:8126508:-	1
bdi-miR395n-3p	DACA005525	3	-1	1	20	1519	1538	UGAAGUGUUUGGGGGAACUC	:::::. :.:::.::.::::	GAGUUUGCUCAAGCAUUUCA	Cleavage	locus=Chr12:8111140:8126508:-	1
bdi-miR395o-3p	DACA005525	3	-1	1	20	1519	1538	UGAAGUGUUUGGGGGAACUC	:::::. :.:::.::.::::	GAGUUUGCUCAAGCAUUUCA	Cleavage	locus=Chr12:8111140:8126508:-	1
bdi-miR395q	DACA005525	3	-1	1	20	1519	1538	UGAAGUGUUUGGGGGAACUC	:::::. :.:::.::.::::	GAGUUUGCUCAAGCAUUUCA	Cleavage	locus=Chr12:8111140:8126508:-	1
bdi-miR444b	DACA015342	3	-1	1	21	381	401	UGCAGUUGCUGCCUCAAGCUU	: :: :::::::::::::	AUACAUGCGGCAGCAACUGCA	Cleavage	locus=Chr07:24317952:24325668:-	1
bna-miR390a	DACA005525	3	-1	1	21	3010	3030	AAGCUCAGGAGGGAUAGCGCC	::.:: ::.:.::.:::::::	GGUGCCAUUCUUCUUGAGCUU	Cleavage	locus=Chr12:8111140:8126508:-	1
bna-miR390b	DACA005525	3	-1	1	21	3010	3030	AAGCUCAGGAGGGAUAGCGCC	::.:: ::.:.::.:::::::	GGUGCCAUUCUUCUUGAGCUU	Cleavage	locus=Chr12:8111140:8126508:-	1
bna-miR390c	DACA005525	3	-1	1	21	3010	3030	AAGCUCAGGAGGGAUAGCGCC	::.:: ::.:.::.:::::::	GGUGCCAUUCUUCUUGAGCUU	Cleavage	locus=Chr12:8111140:8126508:-	1
bra-miR390-5p	DACA005525	3	-1	1	21	3010	3030	AAGCUCAGGAGGGAUAGCGCC	::.:: ::.:.::.:::::::	GGUGCCAUUCUUCUUGAGCUU	Cleavage	locus=Chr12:8111140:8126508:-	1
cca-miR390	DACA005525	3	-1	1	21	3010	3030	AAGCUCAGGAGGGAUAGCGUC	:..:: ::.:.::.:::::::	GGUGCCAUUCUUCUUGAGCUU	Cleavage	locus=Chr12:8111140:8126508:-	1
cme-miR172f	DACA002429	3	-1	1	21	2185	2205	UGAAUCUUGAUGAUGCCGCAC	: .:::::::::::::: ::	CUAUGGCAUCAUCAAGAUGCA	Cleavage	locus=Chr11:16707398:16716252:-	1
cme-miR390a	DACA005525	3	-1	1	21	3010	3030	AAGCUCAGGAGGGAUAGCGCC	::.:: ::.:.::.:::::::	GGUGCCAUUCUUCUUGAGCUU	Cleavage	locus=Chr12:8111140:8126508:-	1
cme-miR390b	DACA005525	3	-1	1	21	3010	3030	AAGCUCAGGAGGGAUAGCGCC	::.:: ::.:.::.:::::::	GGUGCCAUUCUUCUUGAGCUU	Cleavage	locus=Chr12:8111140:8126508:-	1
cme-miR390c	DACA005525	3	-1	1	21	3010	3030	AAGCUCAGGAGGGAUAGCGCC	::.:: ::.:.::.:::::::	GGUGCCAUUCUUCUUGAGCUU	Cleavage	locus=Chr12:8111140:8126508:-	1
cme-miR390d	DACA005525	3	-1	1	21	3010	3030	AAGCUCAGGAGGGAUAGCGCC	::.:: ::.:.::.:::::::	GGUGCCAUUCUUCUUGAGCUU	Cleavage	locus=Chr12:8111140:8126508:-	1
cpa-miR390a	DACA005525	3	-1	1	21	3010	3030	AAGCUCAGGAGGGAUAGCGCC	::.:: ::.:.::.:::::::	GGUGCCAUUCUUCUUGAGCUU	Cleavage	locus=Chr12:8111140:8126508:-	1
cpa-miR390b	DACA005525	3	-1	1	21	3010	3030	AAGCUCAGGAGGGAUAGCGCC	::.:: ::.:.::.:::::::	GGUGCCAUUCUUCUUGAGCUU	Cleavage	locus=Chr12:8111140:8126508:-	1
cpa-miR395a	DACA005525	3	-1	1	20	1519	1538	UGAAGUGUUUGGGGGAACUC	:::::. :.:::.::.::::	GAGUUUGCUCAAGCAUUUCA	Cleavage	locus=Chr12:8111140:8126508:-	1
cpa-miR395b	DACA005525	3	-1	1	20	1519	1538	UGAAGUGUUUGGGGGAACUC	:::::. :.:::.::.::::	GAGUUUGCUCAAGCAUUUCA	Cleavage	locus=Chr12:8111140:8126508:-	1
cpa-miR395c	DACA005525	3	-1	1	20	1519	1538	UGAAGUGUUUGGGGGAACUC	:::::. :.:::.::.::::	GAGUUUGCUCAAGCAUUUCA	Cleavage	locus=Chr12:8111140:8126508:-	1
cpa-miR395d	DACA005525	3	-1	1	20	1519	1538	UGAAGUGUUUGGGGGAACUC	:::::. :.:::.::.::::	GAGUUUGCUCAAGCAUUUCA	Cleavage	locus=Chr12:8111140:8126508:-	1
cpa-miR395e	DACA005525	3	-1	1	20	1519	1538	UGAAGUGUUUGGGGGAACUC	:::::. :.:::.::.::::	GAGUUUGCUCAAGCAUUUCA	Cleavage	locus=Chr12:8111140:8126508:-	1
csi-miR390	DACA005525	3	-1	1	21	3010	3030	AAGCUCAGGAGGGAUAGCGCC	::.:: ::.:.::.:::::::	GGUGCCAUUCUUCUUGAGCUU	Cleavage	locus=Chr12:8111140:8126508:-	1
esi-miR3466-3p	DACA022464	3	-1	1	21	547	567	UGAUGGUCGUCCUCCGAAAGG	:::.:::::.: :.:::::	GGUUUUGGAGGGCCAUCAUCA	Cleavage	locus=Chr03:28715628:28717834:+	1
ghr-miR390a	DACA005525	3	-1	1	21	3010	3030	AAGCUCAGGAGGGAUAGCGCC	::.:: ::.:.::.:::::::	GGUGCCAUUCUUCUUGAGCUU	Cleavage	locus=Chr12:8111140:8126508:-	1
ghr-miR390b	DACA005525	3	-1	1	21	3010	3030	AAGCUCAGGAGGGAUAGCGCC	::.:: ::.:.::.:::::::	GGUGCCAUUCUUCUUGAGCUU	Cleavage	locus=Chr12:8111140:8126508:-	1
ghr-miR390c	DACA005525	3	-1	1	21	3010	3030	AAGCUCAGGAGGGAUAGCGCC	::.:: ::.:.::.:::::::	GGUGCCAUUCUUCUUGAGCUU	Cleavage	locus=Chr12:8111140:8126508:-	1
gma-miR319n	DACA022171	3	-1	1	21	2134	2154	UUUGGACCGAAGGGAGCCCCU	:: : .::::::::::.::	GUGGACCUCCUUCGGUCCGAA	Cleavage	locus=Chr02:2486221:2491454:+	1
gma-miR390a-5p	DACA005525	3	-1	1	21	3010	3030	AAGCUCAGGAGGGAUAGCGCC	::.:: ::.:.::.:::::::	GGUGCCAUUCUUCUUGAGCUU	Cleavage	locus=Chr12:8111140:8126508:-	1
gma-miR390e	DACA005525	3	-1	1	20	3010	3029	AGCUCAGGAGGGAUAGCGCC	::.:: ::.:.::.::::::	GGUGCCAUUCUUCUUGAGCU	Cleavage	locus=Chr12:8111140:8126508:-	1
gma-miR390f	DACA005525	3	-1	1	21	3010	3030	AAGCUCAGGAGGGAUAGCGCC	::.:: ::.:.::.:::::::	GGUGCCAUUCUUCUUGAGCUU	Cleavage	locus=Chr12:8111140:8126508:-	1
gma-miR390g	DACA005525	3	-1	1	21	3010	3030	AAGCUCAGGAGGGAUAGCGCC	::.:: ::.:.::.:::::::	GGUGCCAUUCUUCUUGAGCUU	Cleavage	locus=Chr12:8111140:8126508:-	1
gma-miR395d	DACA005525	3	-1	1	21	1518	1538	UGAAGUGUUUGGGGGAACUUU	.::::. :.:::.::.::::	UGAGUUUGCUCAAGCAUUUCA	Cleavage	locus=Chr12:8111140:8126508:-	1
gma-miR395e	DACA005525	3	-1	1	21	1518	1538	UGAAGUGUUUGGGGGAACUUU	.::::. :.:::.::.::::	UGAGUUUGCUCAAGCAUUUCA	Cleavage	locus=Chr12:8111140:8126508:-	1
gma-miR395f	DACA005525	3	-1	1	21	1518	1538	UGAAGUGUUUGGGGGAACUUU	.::::. :.:::.::.::::	UGAGUUUGCUCAAGCAUUUCA	Cleavage	locus=Chr12:8111140:8126508:-	1
gma-miR395g	DACA005525	3	-1	1	21	1518	1538	UGAAGUGUUUGGGGGAACUUU	.::::. :.:::.::.::::	UGAGUUUGCUCAAGCAUUUCA	Cleavage	locus=Chr12:8111140:8126508:-	1
gma-miR395h	DACA005525	3	-1	1	21	1519	1539	AUGAAGUGUUUGGGAGAACUC	:::::. :.:::.::.:::::	GAGUUUGCUCAAGCAUUUCAU	Cleavage	locus=Chr12:8111140:8126508:-	1
gma-miR395i	DACA005525	3	-1	1	21	1519	1539	AUGAAGUGUUUGGGGGAACUC	:::::. :.:::.::.:::::	GAGUUUGCUCAAGCAUUUCAU	Cleavage	locus=Chr12:8111140:8126508:-	1
gma-miR395j	DACA005525	3	-1	1	21	1519	1539	AUGAAGUGUUUGGGGGAACUC	:::::. :.:::.::.:::::	GAGUUUGCUCAAGCAUUUCAU	Cleavage	locus=Chr12:8111140:8126508:-	1
gma-miR395k	DACA005525	3	-1	1	21	1519	1539	AUGAAGUGUUUGGGGGAACUC	:::::. :.:::.::.:::::	GAGUUUGCUCAAGCAUUUCAU	Cleavage	locus=Chr12:8111140:8126508:-	1
gma-miR395l	DACA005525	3	-1	1	21	1519	1539	AUGAAGUGUUUGGGGGAACUC	:::::. :.:::.::.:::::	GAGUUUGCUCAAGCAUUUCAU	Cleavage	locus=Chr12:8111140:8126508:-	1
gma-miR395m	DACA005525	3	-1	1	21	1519	1539	AUGAAGUGUUUGGGGGAACUC	:::::. :.:::.::.:::::	GAGUUUGCUCAAGCAUUUCAU	Cleavage	locus=Chr12:8111140:8126508:-	1
gma-miR4363	DACA015668	3	-1	1	22	1850	1871	CGAUUACCAGAAGGCUUAUUAG	::::. :.:::::::.::.:	GAAAUAGACUUUCUGGUGAUUG	Cleavage	locus=Chr08:11066706:11074546:-	1
gma-miR5036	DACA008865	3	-1	1	22	2113	2134	AGAGGCCCUUGGGGAGGAGUAA	:::::::::: ::::.::	CCCCUCCUCCCCAUGGGCUUCG	Cleavage	locus=Chr10:9714453:9720437:+	1
gra-miR8668	DACA022464	3	-1	1	20	217	236	UUUUGGAAUCAAGACUACAU	:: :::.:::.::::::::	AUCAAGUUUUGGUUCCAAAA	Cleavage	locus=Chr03:28715628:28717834:+	1
gra-miR8668	DACA020352	3	-1	1	20	337	356	UUUUGGAAUCAAGACUACAU	:: :::.:::.::::::::	AUAAAGUUUUGGUUCCAAAA	Cleavage	locus=Chr10:503444:504689:-	1
gra-miR8757a	DACA017212	3	-1	1	23	917	939	UGGGCCGAGCUUGGACAAGCAUA	::: :: :::::::::::.	GGGCCUUCUCGAAGCUCGGCCCG	Cleavage	locus=Chr02:15648176:15651151:+	1
gra-miR8765	DACA022464	3	-1	1	21	412	432	UUAGUGGAGCUCAUGCUAGAA	: : :::::::::::::. ::	UCCAAGCAUGAGCUCCAUGAA	Cleavage	locus=Chr03:28715628:28717834:+	1
hex-miR390a	DACA005525	3	-1	1	21	3010	3030	AAGCUCAGGAGGGAUAGCGCC	::.:: ::.:.::.:::::::	GGUGCCAUUCUUCUUGAGCUU	Cleavage	locus=Chr12:8111140:8126508:-	1
hex-miR390b	DACA005525	3	-1	1	21	3010	3030	AAGCUCAGGAGGGAUAGCGCC	::.:: ::.:.::.:::::::	GGUGCCAUUCUUCUUGAGCUU	Cleavage	locus=Chr12:8111140:8126508:-	1
hvu-miR5048a	DACA008865	3	-1	1	22	1048	1069	UAUUUGCAGGUUUUAGGUCUAA	:.::.:::::.::::..:::	AUGGAUCUAAAGCCUGUGAAUC	Cleavage	locus=Chr10:9714453:9720437:+	1
hvu-miR5048b	DACA008865	3	-1	1	22	1048	1069	UAUUUGCAGGUUUUAGGUCUAA	:.::.:::::.::::..:::	AUGGAUCUAAAGCCUGUGAAUC	Cleavage	locus=Chr10:9714453:9720437:+	1
lja-miR390a-5p	DACA005525	3	-1	1	21	3010	3030	AAGCUCAGGAGGGAUAGCGCC	::.:: ::.:.::.:::::::	GGUGCCAUUCUUCUUGAGCUU	Cleavage	locus=Chr12:8111140:8126508:-	1
lja-miR390b-5p	DACA005525	3	-1	1	21	3010	3030	AAGCUCAGGAGGGAUAGCGCC	::.:: ::.:.::.:::::::	GGUGCCAUUCUUCUUGAGCUU	Cleavage	locus=Chr12:8111140:8126508:-	1
mdm-miR390a	DACA005525	3	-1	1	21	3010	3030	AAGCUCAGGAGGGAUAGCGCC	::.:: ::.:.::.:::::::	GGUGCCAUUCUUCUUGAGCUU	Cleavage	locus=Chr12:8111140:8126508:-	1
mdm-miR390b	DACA005525	3	-1	1	21	3010	3030	AAGCUCAGGAGGGAUAGCGCC	::.:: ::.:.::.:::::::	GGUGCCAUUCUUCUUGAGCUU	Cleavage	locus=Chr12:8111140:8126508:-	1
mdm-miR390c	DACA005525	3	-1	1	21	3010	3030	AAGCUCAGGAGGGAUAGCGCC	::.:: ::.:.::.:::::::	GGUGCCAUUCUUCUUGAGCUU	Cleavage	locus=Chr12:8111140:8126508:-	1
mdm-miR390d	DACA005525	3	-1	1	21	3010	3030	AAGCUCAGGAGGGAUAGCGCC	::.:: ::.:.::.:::::::	GGUGCCAUUCUUCUUGAGCUU	Cleavage	locus=Chr12:8111140:8126508:-	1
mdm-miR390e	DACA005525	3	-1	1	21	3010	3030	AAGCUCAGGAGGGAUAGCGCC	::.:: ::.:.::.:::::::	GGUGCCAUUCUUCUUGAGCUU	Cleavage	locus=Chr12:8111140:8126508:-	1
mdm-miR390f	DACA005525	3	-1	1	21	3010	3030	AAGCUCAGGAGGGAUAGCGCC	::.:: ::.:.::.:::::::	GGUGCCAUUCUUCUUGAGCUU	Cleavage	locus=Chr12:8111140:8126508:-	1
mes-miR172c	DACA002429	3	-1	1	21	2185	2205	UGAAUCUUGAUGAUGCUACGC	:.::::::::::::: ::	CUAUGGCAUCAUCAAGAUGCA	Cleavage	locus=Chr11:16707398:16716252:-	1
mes-miR2950	DACA008364	3	-1	1	21	97	117	UUCCAUCUCUUGCACACUGGA	.:::::::::.::::::	GUGGGUGUGCAAGGGAUGGAU	Cleavage	locus=Chr09:6034729:6035961:+	1
mtr-miR2601	DACA020351	3	-1	1	22	1168	1189	UAUUUGGUAUCGCUUUGGUCCC	:::.: :.::::.:::::.	ACCACCGAUGUGAUAUCAAAUG	Cleavage	locus=Chr10:543702:547889:+	1
mtr-miR2601	DACA025095	3	-1	1	22	973	994	UAUUUGGUAUCGCUUUGGUCCC	:::.: :.::::.:::::.	ACCACCGAUGUGAUAUCAAAUG	Cleavage	locus=Chr52:553692:557879:+	1
mtr-miR390	DACA005525	3	-1	1	21	3010	3030	AAGCUCAGGAGGGAUAGCGCC	::.:: ::.:.::.:::::::	GGUGCCAUUCUUCUUGAGCUU	Cleavage	locus=Chr12:8111140:8126508:-	1
mtr-miR395a	DACA005525	3	-1	1	21	1519	1539	AUGAAGUGUUUGGGGGAACUC	:::::. :.:::.::.:::::	GAGUUUGCUCAAGCAUUUCAU	Cleavage	locus=Chr12:8111140:8126508:-	1
mtr-miR395c	DACA005525	3	-1	1	21	1519	1539	AUGAAGUGUUUGGGGGAACUC	:::::. :.:::.::.:::::	GAGUUUGCUCAAGCAUUUCAU	Cleavage	locus=Chr12:8111140:8126508:-	1
mtr-miR395d	DACA005525	3	-1	1	21	1519	1539	AUGAAGUGUUUGGGGGAACUC	:::::. :.:::.::.:::::	GAGUUUGCUCAAGCAUUUCAU	Cleavage	locus=Chr12:8111140:8126508:-	1
mtr-miR395e	DACA005525	3	-1	1	21	1519	1539	AUGAAGUGUUUGGGGGAACUC	:::::. :.:::.::.:::::	GAGUUUGCUCAAGCAUUUCAU	Cleavage	locus=Chr12:8111140:8126508:-	1
mtr-miR395f	DACA005525	3	-1	1	21	1519	1539	AUGAAGUGUUUGGGGGAACUC	:::::. :.:::.::.:::::	GAGUUUGCUCAAGCAUUUCAU	Cleavage	locus=Chr12:8111140:8126508:-	1
mtr-miR395h	DACA005525	3	-1	1	21	1519	1539	AUGAAGUGUUUGGGGGAACUU	.::::. :.:::.::.:::::	GAGUUUGCUCAAGCAUUUCAU	Cleavage	locus=Chr12:8111140:8126508:-	1
mtr-miR395i	DACA005525	3	-1	1	21	1519	1539	AUGAAGUGUUUGGGGGAACUC	:::::. :.:::.::.:::::	GAGUUUGCUCAAGCAUUUCAU	Cleavage	locus=Chr12:8111140:8126508:-	1
mtr-miR395j	DACA005525	3	-1	1	21	1519	1539	AUGAAGUGUUUGGGGGAACUC	:::::. :.:::.::.:::::	GAGUUUGCUCAAGCAUUUCAU	Cleavage	locus=Chr12:8111140:8126508:-	1
mtr-miR395l	DACA005525	3	-1	1	21	1519	1539	AUGAAGUGUUUGGGGGAACUC	:::::. :.:::.::.:::::	GAGUUUGCUCAAGCAUUUCAU	Cleavage	locus=Chr12:8111140:8126508:-	1
mtr-miR395m	DACA005525	3	-1	1	21	1519	1539	AUGAAGUGUUUGGGGGAACUC	:::::. :.:::.::.:::::	GAGUUUGCUCAAGCAUUUCAU	Cleavage	locus=Chr12:8111140:8126508:-	1
mtr-miR395n	DACA005525	3	-1	1	21	1519	1539	AUGAAGUGUUUGGGGGAACUC	:::::. :.:::.::.:::::	GAGUUUGCUCAAGCAUUUCAU	Cleavage	locus=Chr12:8111140:8126508:-	1
mtr-miR395o	DACA005525	3	-1	1	21	1519	1539	AUGAAGUGUUUGGGGGAACUC	:::::. :.:::.::.:::::	GAGUUUGCUCAAGCAUUUCAU	Cleavage	locus=Chr12:8111140:8126508:-	1
mtr-miR4414b	DACA015668	3	-1	1	21	1754	1774	UGUGAAUGAUGCGGGAGCUAA	:.:.:.::::::::::: ::	CUGGUUUCCGCAUCAUUCCCA	Cleavage	locus=Chr08:11066706:11074546:-	1
nta-miR390b	DACA005525	3	-1	1	21	3010	3030	AAGCUCAGGAGGGAUAGCGCC	::.:: ::.:.::.:::::::	GGUGCCAUUCUUCUUGAGCUU	Cleavage	locus=Chr12:8111140:8126508:-	1
nta-miR390c	DACA005525	3	-1	1	21	3010	3030	AAGCUCAGGAGGGAUAGCGCC	::.:: ::.:.::.:::::::	GGUGCCAUUCUUCUUGAGCUU	Cleavage	locus=Chr12:8111140:8126508:-	1
nta-miR482a	DACA010840	3	-1	1	22	1079	1100	UUUCCAAUUCCACCCAUUCCUA	::::::::::::: : ::::	GCGGAAUGGGUGGAACUAGAAA	Cleavage	locus=Chr04:24213209:24217283:-	1
nta-miR482a	DACA025095	3	-1	1	22	992	1013	UUUCCAAUUCCACCCAUUCCUA	::::::::::::: : ::::	AUGGAAUGGGUGGAACUAGAAA	Cleavage	locus=Chr52:553692:557879:+	1
nta-miR482a	DACA020351	3	-1	1	22	1187	1208	UUUCCAAUUCCACCCAUUCCUA	::::::::::::: : ::::	AUGGAAUGGGUGGAACUAGAAA	Cleavage	locus=Chr10:543702:547889:+	1
nta-miR482c	DACA010840	3	-1	1	22	1079	1100	UUUCCAAUUCCACCCAUUCCUA	::::::::::::: : ::::	GCGGAAUGGGUGGAACUAGAAA	Cleavage	locus=Chr04:24213209:24217283:-	1
nta-miR482c	DACA025095	3	-1	1	22	992	1013	UUUCCAAUUCCACCCAUUCCUA	::::::::::::: : ::::	AUGGAAUGGGUGGAACUAGAAA	Cleavage	locus=Chr52:553692:557879:+	1
nta-miR482c	DACA020351	3	-1	1	22	1187	1208	UUUCCAAUUCCACCCAUUCCUA	::::::::::::: : ::::	AUGGAAUGGGUGGAACUAGAAA	Cleavage	locus=Chr10:543702:547889:+	1
osa-miR1847.1	DACA015342	3	-1	1	21	388	408	UGCAGUUUGCAGUUGUGGCAC	:: .:::::::::: ::::	CGGCAGCAACUGCAAAGUGCA	Cleavage	locus=Chr07:24317952:24325668:-	1
osa-miR2877	DACA017212	3	-1	1	24	220	243	UUGCAUCCUCUGCACUUUGGGCCU	:.:. :::::::::::::	CCGGACGAGAAGCAGAGGAUGCAA	Cleavage	locus=Chr02:15648176:15651151:+	1
osa-miR2877	DACA021755	3	-1	1	24	265	288	UUGCAUCCUCUGCACUUUGGGCCU	:.:. :::::::::::::	CCGGACGAGAAGCAGAGGAUGCAA	Cleavage	locus=Chr09:9598434:9601733:-	1
osa-miR390-5p	DACA005525	3	-1	1	21	3010	3030	AAGCUCAGGAGGGAUAGCGCC	::.:: ::.:.::.:::::::	GGUGCCAUUCUUCUUGAGCUU	Cleavage	locus=Chr12:8111140:8126508:-	1
osa-miR395a	DACA005525	3	-1	1	21	1519	1539	GUGAAGUGCUUGGGGGAACUC	:::::. :.::::::.::::.	GAGUUUGCUCAAGCAUUUCAU	Cleavage	locus=Chr12:8111140:8126508:-	1
osa-miR395t	DACA005525	3	-1	1	21	1519	1539	GUGAAGUGUUUGGGGAAACUC	:::::: :.:::.::.::::.	GAGUUUGCUCAAGCAUUUCAU	Cleavage	locus=Chr12:8111140:8126508:-	1
osa-miR444a-3p.2	DACA015342	3	-1	1	21	381	401	UGCAGUUGCUGCCUCAAGCUU	: :: :::::::::::::	AUACAUGCGGCAGCAACUGCA	Cleavage	locus=Chr07:24317952:24325668:-	1
osa-miR444d.2	DACA015342	3	-1	1	21	381	401	UGCAGUUGCUGCCUCAAGCUU	: :: :::::::::::::	AUACAUGCGGCAGCAACUGCA	Cleavage	locus=Chr07:24317952:24325668:-	1
osa-miR444e	DACA015342	3	-1	1	21	381	401	UGCAGUUGCUGCCUCAAGCUU	: :: :::::::::::::	AUACAUGCGGCAGCAACUGCA	Cleavage	locus=Chr07:24317952:24325668:-	1
osa-miR5075	DACA017212	3	-1	1	21	652	672	UUCUCCGUCGCCGCCGUCCGC	:.::::::::.:::::..	GGCGGCGGCGGCGGCGGAGGG	Cleavage	locus=Chr02:15648176:15651151:+	2
osa-miR6249a	DACA022106	3	-1	1	21	303	323	CGUGAAGAGCUCGCCGGCGGC	:::::::. :::::::::	AAGGCCGGCGGUCUCUUCACG	Translation	locus=Chr06:11266475:11267521:-	1
osa-miR6249b	DACA022106	3	-1	1	21	303	323	CGUGAAGAGCUCGCCGGCGGC	:::::::. :::::::::	AAGGCCGGCGGUCUCUUCACG	Translation	locus=Chr06:11266475:11267521:-	1
ppt-miR1074	DACA017212	3	-1	1	21	2182	2202	AGGGUUGUUAGUUGUGUUGAU	.:::::::...::::::::.	GUCAACACGGUUAACAACCUC	Cleavage	locus=Chr02:15648176:15651151:+	1
ppt-miR390a	DACA005525	3	-1	1	21	3010	3030	AAGCUCAGGAGGGAUAGCGCC	::.:: ::.:.::.:::::::	GGUGCCAUUCUUCUUGAGCUU	Cleavage	locus=Chr12:8111140:8126508:-	1
ppt-miR390b	DACA005525	3	-1	1	21	3010	3030	AAGCUCAGGAGGGAUAGCGCC	::.:: ::.:.::.:::::::	GGUGCCAUUCUUCUUGAGCUU	Cleavage	locus=Chr12:8111140:8126508:-	1
ptc-miR390a	DACA005525	3	-1	1	21	3010	3030	AAGCUCAGGAGGGAUAGCGCC	::.:: ::.:.::.:::::::	GGUGCCAUUCUUCUUGAGCUU	Cleavage	locus=Chr12:8111140:8126508:-	1
ptc-miR390b	DACA005525	3	-1	1	21	3010	3030	AAGCUCAGGAGGGAUAGCGCC	::.:: ::.:.::.:::::::	GGUGCCAUUCUUCUUGAGCUU	Cleavage	locus=Chr12:8111140:8126508:-	1
ptc-miR390c	DACA005525	3	-1	1	21	3010	3030	AAGCUCAGGAGGGAUAGCGCC	::.:: ::.:.::.:::::::	GGUGCCAUUCUUCUUGAGCUU	Cleavage	locus=Chr12:8111140:8126508:-	1
ptc-miR390d-5p	DACA005525	3	-1	1	21	3010	3030	AAGCUCAGGAGGGAUAGCGCC	::.:: ::.:.::.:::::::	GGUGCCAUUCUUCUUGAGCUU	Cleavage	locus=Chr12:8111140:8126508:-	1
rco-miR390a	DACA005525	3	-1	1	21	3010	3030	AAGCUCAGGAGGGAUAGCGCC	::.:: ::.:.::.:::::::	GGUGCCAUUCUUCUUGAGCUU	Cleavage	locus=Chr12:8111140:8126508:-	1
rco-miR390b	DACA005525	3	-1	1	21	3010	3030	AAGCUCAGGAGGGAUAGCGCC	::.:: ::.:.::.:::::::	GGUGCCAUUCUUCUUGAGCUU	Cleavage	locus=Chr12:8111140:8126508:-	1
sbi-miR390	DACA005525	3	-1	1	21	3010	3030	AAGCUCAGGAGGGAUAGCGCC	::.:: ::.:.::.:::::::	GGUGCCAUUCUUCUUGAGCUU	Cleavage	locus=Chr12:8111140:8126508:-	1
sbi-miR395f	DACA005525	3	-1	1	21	1519	1539	AUGAAGUGUUUGGGGGAACUC	:::::. :.:::.::.:::::	GAGUUUGCUCAAGCAUUUCAU	Cleavage	locus=Chr12:8111140:8126508:-	1
sbi-miR395l	DACA005525	3	-1	1	21	1519	1539	GUGAAGUGCUUGGGGGAACUC	:::::. :.::::::.::::.	GAGUUUGCUCAAGCAUUUCAU	Cleavage	locus=Chr12:8111140:8126508:-	1
sbi-miR397-3p	DACA009322	3	-1	1	21	578	598	UCACCGGCGCUGCACUCAAUU	::::: ::.:::.::::::	UAUUGAACGCGGCGUCGGUGA	Cleavage	locus=Chr09:14296476:14297507:-	1
sly-miR390b-5p	DACA005525	3	-1	1	21	3010	3030	AAGCUCAGGAGGGAUAGCGCC	::.:: ::.:.::.:::::::	GGUGCCAUUCUUCUUGAGCUU	Cleavage	locus=Chr12:8111140:8126508:-	1
sly-miR482a	DACA020351	3	-1	1	22	1187	1208	UUUCCAAUUCCACCCAUUCCUA	::::::::::::: : ::::	AUGGAAUGGGUGGAACUAGAAA	Cleavage	locus=Chr10:543702:547889:+	1
sly-miR482a	DACA010840	3	-1	1	22	1079	1100	UUUCCAAUUCCACCCAUUCCUA	::::::::::::: : ::::	GCGGAAUGGGUGGAACUAGAAA	Cleavage	locus=Chr04:24213209:24217283:-	1
sly-miR482a	DACA025095	3	-1	1	22	992	1013	UUUCCAAUUCCACCCAUUCCUA	::::::::::::: : ::::	AUGGAAUGGGUGGAACUAGAAA	Cleavage	locus=Chr52:553692:557879:+	1
stu-miR482a-3p	DACA020351	3	-1	1	22	1187	1208	UUUCCAAUUCCACCCAUUCCUA	::::::::::::: : ::::	AUGGAAUGGGUGGAACUAGAAA	Cleavage	locus=Chr10:543702:547889:+	1
stu-miR482a-3p	DACA010840	3	-1	1	22	1079	1100	UUUCCAAUUCCACCCAUUCCUA	::::::::::::: : ::::	GCGGAAUGGGUGGAACUAGAAA	Cleavage	locus=Chr04:24213209:24217283:-	1
stu-miR482a-3p	DACA025095	3	-1	1	22	992	1013	UUUCCAAUUCCACCCAUUCCUA	::::::::::::: : ::::	AUGGAAUGGGUGGAACUAGAAA	Cleavage	locus=Chr52:553692:557879:+	1
tae-miR395b	DACA005525	3	-1	1	20	1519	1538	UGAAGUGUUUGGGGGAACUC	:::::. :.:::.::.::::	GAGUUUGCUCAAGCAUUUCA	Cleavage	locus=Chr12:8111140:8126508:-	1
tae-miR9773	DACA000928	3	-1	1	24	328	351	UUUGUUUUUAUGUUAUUUUGUGAA	:...:: ::.::.::::::::	CGGAUGGAAGAAUAUGAAAACAAA	Cleavage	locus=Chr10:17663768:17664732:-	1
tae-miR9773	DACA000927	3	-1	1	24	331	354	UUUGUUUUUAUGUUAUUUUGUGAA	: ..:.:..:::.::::::::	CGAAAGGAGUGGCAUGAAAACAAA	Cleavage	locus=Chr10:17698392:17699669:-	1
tcc-miR169f	DACA002429	3	-1	1	21	1247	1267	AAGCCAAGAAUGACUUGCCUG	::: .:::::: :::::::	AUGGCUGGUCAUUGUUGGCUU	Cleavage	locus=Chr11:16707398:16716252:-	1
tcc-miR390a	DACA005525	3	-1	1	21	3010	3030	AAGCUCAGGAGGGAUAGCGCC	::.:: ::.:.::.:::::::	GGUGCCAUUCUUCUUGAGCUU	Cleavage	locus=Chr12:8111140:8126508:-	1
tcc-miR390b	DACA005525	3	-1	1	21	3010	3030	AAGCUCAGGAGGGAUAGCGCC	::.:: ::.:.::.:::::::	GGUGCCAUUCUUCUUGAGCUU	Cleavage	locus=Chr12:8111140:8126508:-	1
vvi-miR172a	DACA002429	3	-1	1	21	2185	2205	UGAAUCUUGAUGAUGCUACAU	: :.::::::::::::: ::	CUAUGGCAUCAUCAAGAUGCA	Cleavage	locus=Chr11:16707398:16716252:-	1
vvi-miR172b	DACA002429	3	-1	1	21	2185	2205	UGAAUCUUGAUGAUGCUACAC	: :.::::::::::::: ::	CUAUGGCAUCAUCAAGAUGCA	Cleavage	locus=Chr11:16707398:16716252:-	1
vvi-miR2950-5p	DACA008364	3	-1	1	21	97	117	UUCCAUCUCUUGCACACUGGA	.:::::::::.::::::	GUGGGUGUGCAAGGGAUGGAU	Cleavage	locus=Chr09:6034729:6035961:+	1
vvi-miR390	DACA005525	3	-1	1	21	3010	3030	AAGCUCAGGAGGGAUAGCGCC	::.:: ::.:.::.:::::::	GGUGCCAUUCUUCUUGAGCUU	Cleavage	locus=Chr12:8111140:8126508:-	1
zma-miR390a-5p	DACA005525	3	-1	1	21	3010	3030	AAGCUCAGGAGGGAUAGCGCC	::.:: ::.:.::.:::::::	GGUGCCAUUCUUCUUGAGCUU	Cleavage	locus=Chr12:8111140:8126508:-	1
zma-miR390b-5p	DACA005525	3	-1	1	21	3010	3030	AAGCUCAGGAGGGAUAGCGCC	::.:: ::.:.::.:::::::	GGUGCCAUUCUUCUUGAGCUU	Cleavage	locus=Chr12:8111140:8126508:-	1
zma-miR395o-3p	DACA005525	3	-1	1	21	1519	1539	GUGAAGUGUUUGGGUGAACUC	:::::..:.:::.::.::::.	GAGUUUGCUCAAGCAUUUCAU	Cleavage	locus=Chr12:8111140:8126508:-	1
zma-miR399b-5p	DACA008865	3	-1	1	21	2001	2021	GUGCAGCUCUCCUCUGGCAUG	::::.: :::::::: ::::	GAUGCUACAGGAGAGCAGCAC	Cleavage	locus=Chr10:9714453:9720437:+	1
zma-miR399i-5p	DACA008865	3	-1	1	21	2001	2021	GUGCGGCUCUCCUCUGGCAUG	::::.: :::::::: ::::	GAUGCUACAGGAGAGCAGCAC	Cleavage	locus=Chr10:9714453:9720437:+	1
aly-miR161-5p.2	DACA022171	3.5	-1	1	21	681	701	UCAAUGCAUUGAAAGUGACUA	: :: ::: ::.::::.::::	UCGUGACUGUCGAUGCGUUGA	Cleavage	locus=Chr02:2486221:2491454:+	1
aly-miR172d-5p	DACA002672	3.5	-1	1	21	2132	2152	GCAACAUCUUCAAGAUUCAGA	::: :::::::.::::::	GCUGCUCCUUGAAGGUGUUGC	Cleavage	locus=Chr07:12662273:12669644:-	1
aly-miR172e-3p	DACA002429	3.5	-1	1	20	2185	2204	GAAUCUUGAUGAUGCUGCAU	: ..::::::::::::: :	CUAUGGCAUCAUCAAGAUGC	Cleavage	locus=Chr11:16707398:16716252:-	1
aly-miR3447-3p	DACA018089	3.5	-1	1	21	434	454	UUUGAGUGUGUUUGUUAUGAA	: :: :::::.:.::: ::::	UCCAAAACAAGCGCACCCAAA	Cleavage	locus=Chr11:2157606:2162912:+	1
aly-miR834-3p	DACA022464	3.5	-1	1	21	382	402	UGGUAGCAGUAGCGGUGGUAA	: ::..::::.::.::.::	AAAACAUUGCUAUUGUUAUCA	Cleavage	locus=Chr03:28715628:28717834:+	1
aly-miR837-5p	DACA004061	3.5	-1	1	21	116	136	CAUUGUUUCUUGUUUUUUUCA	.::.:.:..::::.:.:::	AAGAAGAGAUGAGAAGCGAUG	Cleavage	locus=Chr03:20116171:20117182:+	1
aly-miR838-3p	DACA006650	3.5	-1	1	21	92	112	UUUUCUUCUUCUUCUUGCACA	::::..:::::.:::::	ACAACAAGGGGAAGAGGAAAA	Cleavage	locus=Chr17:11045:11756:+	1
aly-miR838-3p	DACA022464	3.5	-1	1	21	74	94	UUUUCUUCUUCUUCUUGCACA	::::::::::::::: :	CAAACAAGAAGAAGAAGAAUA	Cleavage	locus=Chr03:28715628:28717834:+	1
aly-miR838-3p	DACA006215	3.5	-1	1	21	124	144	UUUUCUUCUUCUUCUUGCACA	:..::.::.::.::::::	AAGGUGAGGAGGAGGAGAAAA	Cleavage	locus=Chr06:7083522:7085003:-	2
aly-miR838-3p	DACA000927	3.5	-1	1	21	149	169	UUUUCUUCUUCUUCUUGCACA	::::: ::: ::::::::	CCUGCAACAAGCAGAAGAAAU	Translation	locus=Chr10:17698392:17699669:-	1
aly-miR838-3p	DACA012489	3.5	-1	1	21	279	299	UUUUCUUCUUCUUCUUGCACA	: :: :.:::::.::.::..:	UUUGGAGGAAGAGGAGGAGGA	Cleavage	locus=Chr04:27666731:27668717:+	1
aly-miR859-5p	DACA020352	3.5	-1	1	21	907	927	UCUCUCCGUUGUAAAAUCAAA	:::: ::.:::: :::::.	GAUGAUCUUGCAACAGAGAGG	Cleavage	locus=Chr10:503444:504689:-	1
ata-miR2275a-5p	DACA002429	3.5	-1	1	20	1175	1195	UGAGUGUUCGAGGAA-AGCAA	:::: :::.:::::::.:.:	CUGCUGUUCUUCGAACAUUUA	Cleavage	locus=Chr11:16707398:16716252:-	1
ath-miR161.2	DACA022171	3.5	-1	1	21	681	701	UCAAUGCAUUGAAAGUGACUA	: :: ::: ::.::::.::::	UCGUGACUGUCGAUGCGUUGA	Cleavage	locus=Chr02:2486221:2491454:+	1
ath-miR172d-5p	DACA002672	3.5	-1	1	21	2132	2152	GCAACAUCUUCAAGAUUCAGA	::: :::::::.::::::	GCUGCUCCUUGAAGGUGUUGC	Cleavage	locus=Chr07:12662273:12669644:-	1
ath-miR4243	DACA013924	3.5	-1	1	21	262	282	UUGAAAUUGUAGAUUUCGUAC	:. :::::::::::: :.:	CAAUUAAAUCUACAAUUCCGA	Cleavage	locus=Chr06:12486019:12486945:-	1
ath-miR5658	DACA000653	3.5	-1	1	21	550	570	AUGAUGAUGAUGAUGAUGAAA	:::::::::::::: ::	GCGCAUCAUCAUCAUCACCAG	Cleavage	locus=Chr07:16064301:16065225:-	1
ath-miR8181	DACA020351	3.5	-1	1	20	1	20	UGGGGGUGGGGGGGUGACAG	:::: ::.:::::::.:.	AUGUCUCCUCCCCACCUCUC	Cleavage	locus=Chr10:543702:547889:+	1
ath-miR8181	DACA025095	3.5	-1	1	20	1	20	UGGGGGUGGGGGGGUGACAG	:::: ::.:::::::.:.	AUGUCUCCUCCCCACCUCUC	Cleavage	locus=Chr52:553692:557879:+	1
ath-miR829-5p	DACA021755	3.5	-1	1	21	350	370	ACUUUGAAGCUUUGAUUUGAA	::::: ::.:.::::.::	CCCAAAUGAAGGUUUCAGAGG	Cleavage	locus=Chr09:9598434:9601733:-	1
ath-miR831-3p	DACA020351	3.5	-1	1	22	1444	1465	UGAUCUCUUCGUACUCUUCUUG	:: : :::::::::.:::: :.	CACGCAGAGUACGAGGAGAACG	Cleavage	locus=Chr10:543702:547889:+	1
ath-miR831-3p	DACA025095	3.5	-1	1	22	1231	1252	UGAUCUCUUCGUACUCUUCUUG	:: : :::::::::.:::: :.	CACGCAGAGUACGAGGAGAACG	Cleavage	locus=Chr52:553692:557879:+	1
ath-miR834	DACA022464	3.5	-1	1	21	382	402	UGGUAGCAGUAGCGGUGGUAA	: ::..::::.::.::.::	AAAACAUUGCUAUUGUUAUCA	Cleavage	locus=Chr03:28715628:28717834:+	1
ath-miR838	DACA000927	3.5	-1	1	21	149	169	UUUUCUUCUACUUCUUGCACA	::::: ::: ::::::::	CCUGCAACAAGCAGAAGAAAU	Translation	locus=Chr10:17698392:17699669:-	1
bdi-miR166f	DACA015668	3.5	-1	1	21	556	576	UCUCGGACCAGGCUUCAUUCC	::.:::::::::::::::.	GGGAUGAAGCCUGGUCCGGAU	Cleavage	locus=Chr08:11066706:11074546:-	1
bdi-miR166f	DACA015342	3.5	-1	1	21	571	591	UCUCGGACCAGGCUUCAUUCC	::.:::::::::::::::.	GGGAUGAAGCCUGGUCCGGAU	Cleavage	locus=Chr07:24317952:24325668:-	1
bdi-miR166f	DACA002429	3.5	-1	1	21	571	591	UCUCGGACCAGGCUUCAUUCC	::.:::::::::::::::.	GGGAUGAAGCCUGGUCCGGAU	Cleavage	locus=Chr11:16707398:16716252:-	1
bdi-miR166f	DACA002672	3.5	-1	1	21	556	576	UCUCGGACCAGGCUUCAUUCC	::.:::::::::::::::.	GGGAUGAAGCCUGGUCCGGAU	Cleavage	locus=Chr07:12662273:12669644:-	1
bdi-miR166f	DACA022171	3.5	-1	1	21	541	561	UCUCGGACCAGGCUUCAUUCC	::.:::::::::::::::.	GGGAUGAAGCCUGGUCCGGAU	Cleavage	locus=Chr02:2486221:2491454:+	1
bdi-miR5181a-5p	DACA002672	3.5	-1	1	21	981	1001	UGAUCCAUAAUAAGUGUCAGG	: :.:: ::::.:::::::	AAUAAUACAUAUUGUGGAUCA	Cleavage	locus=Chr07:12662273:12669644:-	1
bra-miR9557-5p	DACA017499	3.5	-1	1	21	410	430	UUUUGCGUUUCAACUCGGUCC	:: :: :::::::::.:..	AAACGGAAUUGAAACGCGAGG	Cleavage	locus=Chr09:10624920:10626582:-	1
cme-miR156j	DACA015342	3.5	-1	1	22	2491	2514	GUUGACAGAAGAGA--GUGAGCAC	:::.: ::::::.:::::::	UGUCUCGCCUUCUCUUUUGUCAAC	Cleavage	locus=Chr07:24317952:24325668:-	1
cme-miR169r	DACA002429	3.5	-1	1	21	1247	1267	GAGCCAAGAAUGACUUGCCGG	.::: .:::::: ::::::.	AUGGCUGGUCAUUGUUGGCUU	Cleavage	locus=Chr11:16707398:16716252:-	1
cre-miR1164	DACA020351	3.5	-1	1	21	823	843	UGGUGCAACAGGCCAGUGGUU	:.. .: ::.:::::::::::	AGUGGCGGGUCUGUUGCACCA	Cleavage	locus=Chr10:543702:547889:+	1
csi-miR169	DACA002429	3.5	-1	1	21	1247	1267	GAGCCAAGAAUGACUUGCCGA	.::: .:::::: ::::::.	AUGGCUGGUCAUUGUUGGCUU	Cleavage	locus=Chr11:16707398:16716252:-	1
csi-miR477c	DACA002672	3.5	-1	1	22	1438	1459	UCCCUCGAAGGCUUCCAAUAUA	:::::::::.:: :.:::	AGAAUUGGAAGCUUUGGGGGGC	Cleavage	locus=Chr07:12662273:12669644:-	1
egu-miR172d	DACA002429	3.5	-1	1	21	2185	2205	UGAAUCUUGAUGAUGCUGCAC	: ..::::::::::::: ::	CUAUGGCAUCAUCAAGAUGCA	Cleavage	locus=Chr11:16707398:16716252:-	1
egu-miR172e	DACA002429	3.5	-1	1	21	2185	2205	UGAAUCUUGAUGAUGCUGCAC	: ..::::::::::::: ::	CUAUGGCAUCAUCAAGAUGCA	Cleavage	locus=Chr11:16707398:16716252:-	1
egu-miR172f	DACA002429	3.5	-1	1	21	2185	2205	UGAAUCUUGAUGAUGCUGCAC	: ..::::::::::::: ::	CUAUGGCAUCAUCAAGAUGCA	Cleavage	locus=Chr11:16707398:16716252:-	1
gma-miR1514a-3p	DACA005525	3.5	-1	1	21	689	709	AUGCCUAUUUUAAAAUGAAAA	: .::::::::: :::.::	AAUAUAUUUUAAAAAAGGUAU	Cleavage	locus=Chr12:8111140:8126508:-	1
gma-miR1514b-3p	DACA005525	3.5	-1	1	21	689	709	AUGCCUAUUUUAAAAUGAAAA	: .::::::::: :::.::	AAUAUAUUUUAAAAAAGGUAU	Cleavage	locus=Chr12:8111140:8126508:-	1
gma-miR166h-3p	DACA002429	3.5	-1	1	21	571	591	UCUCGGACCAGGCUUCAUUCC	::.:::::::::::::::.	GGGAUGAAGCCUGGUCCGGAU	Cleavage	locus=Chr11:16707398:16716252:-	1
gma-miR166h-3p	DACA015668	3.5	-1	1	21	556	576	UCUCGGACCAGGCUUCAUUCC	::.:::::::::::::::.	GGGAUGAAGCCUGGUCCGGAU	Cleavage	locus=Chr08:11066706:11074546:-	1
gma-miR166h-3p	DACA002672	3.5	-1	1	21	556	576	UCUCGGACCAGGCUUCAUUCC	::.:::::::::::::::.	GGGAUGAAGCCUGGUCCGGAU	Cleavage	locus=Chr07:12662273:12669644:-	1
gma-miR166h-3p	DACA015342	3.5	-1	1	21	571	591	UCUCGGACCAGGCUUCAUUCC	::.:::::::::::::::.	GGGAUGAAGCCUGGUCCGGAU	Cleavage	locus=Chr07:24317952:24325668:-	1
gma-miR166h-3p	DACA022171	3.5	-1	1	21	541	561	UCUCGGACCAGGCUUCAUUCC	::.:::::::::::::::.	GGGAUGAAGCCUGGUCCGGAU	Cleavage	locus=Chr02:2486221:2491454:+	1
gma-miR166k	DACA022171	3.5	-1	1	21	541	561	UCUCGGACCAGGCUUCAUUCC	::.:::::::::::::::.	GGGAUGAAGCCUGGUCCGGAU	Cleavage	locus=Chr02:2486221:2491454:+	1
gma-miR166k	DACA002672	3.5	-1	1	21	556	576	UCUCGGACCAGGCUUCAUUCC	::.:::::::::::::::.	GGGAUGAAGCCUGGUCCGGAU	Cleavage	locus=Chr07:12662273:12669644:-	1
gma-miR166k	DACA015668	3.5	-1	1	21	556	576	UCUCGGACCAGGCUUCAUUCC	::.:::::::::::::::.	GGGAUGAAGCCUGGUCCGGAU	Cleavage	locus=Chr08:11066706:11074546:-	1
gma-miR166k	DACA015342	3.5	-1	1	21	571	591	UCUCGGACCAGGCUUCAUUCC	::.:::::::::::::::.	GGGAUGAAGCCUGGUCCGGAU	Cleavage	locus=Chr07:24317952:24325668:-	1
gma-miR166k	DACA002429	3.5	-1	1	21	571	591	UCUCGGACCAGGCUUCAUUCC	::.:::::::::::::::.	GGGAUGAAGCCUGGUCCGGAU	Cleavage	locus=Chr11:16707398:16716252:-	1
gma-miR166u	DACA022171	3.5	-1	1	20	542	561	UCUCGGACCAGGCUUCAUUC	:.:::::::::::::::.	GGAUGAAGCCUGGUCCGGAU	Cleavage	locus=Chr02:2486221:2491454:+	1
gma-miR166u	DACA002429	3.5	-1	1	20	572	591	UCUCGGACCAGGCUUCAUUC	:.:::::::::::::::.	GGAUGAAGCCUGGUCCGGAU	Cleavage	locus=Chr11:16707398:16716252:-	1
gma-miR166u	DACA002672	3.5	-1	1	20	557	576	UCUCGGACCAGGCUUCAUUC	:.:::::::::::::::.	GGAUGAAGCCUGGUCCGGAU	Cleavage	locus=Chr07:12662273:12669644:-	1
gma-miR166u	DACA015668	3.5	-1	1	20	557	576	UCUCGGACCAGGCUUCAUUC	:.:::::::::::::::.	GGAUGAAGCCUGGUCCGGAU	Cleavage	locus=Chr08:11066706:11074546:-	1
gma-miR166u	DACA015342	3.5	-1	1	20	572	591	UCUCGGACCAGGCUUCAUUC	:.:::::::::::::::.	GGAUGAAGCCUGGUCCGGAU	Cleavage	locus=Chr07:24317952:24325668:-	1
gma-miR169c	DACA002429	3.5	-1	1	21	1247	1267	AAGCCAAGGAUGACUUGCCGA	.::: .:::::. :::::::	AUGGCUGGUCAUUGUUGGCUU	Cleavage	locus=Chr11:16707398:16716252:-	1
gma-miR169s	DACA002429	3.5	-1	1	21	1247	1267	AAGCCAAGGAUGACUUGCCGG	.::: .:::::. :::::::	AUGGCUGGUCAUUGUUGGCUU	Cleavage	locus=Chr11:16707398:16716252:-	1
gma-miR172k	DACA002429	3.5	-1	1	21	2185	2205	UGAAUCUUGAUGAUGCUGCAU	: ..::::::::::::: ::	CUAUGGCAUCAUCAAGAUGCA	Cleavage	locus=Chr11:16707398:16716252:-	1
gma-miR4993	DACA020879	3.5	-1	1	21	788	808	GAGCGGCGGCGGUGGAGGAUG	: ::::::.:::::::.::	CCUCCUCCGCCGCCGCUGCCG	Cleavage	locus=Chr02:14605226:14606667:-	1
gma-miR530a	DACA006215	3.5	-1	1	20	16	35	UGCAUUUGCACCUGCACUUU	:::: : ::: :::::::::	AAAGAGGAGGAGCAAAUGCA	Translation	locus=Chr06:7083522:7085003:-	1
gma-miR530b	DACA006215	3.5	-1	1	21	15	35	UGCAUUUGCACCUGCACUUUA	:::: : ::: :::::::::	CAAAGAGGAGGAGCAAAUGCA	Translation	locus=Chr06:7083522:7085003:-	1
gma-miR530c	DACA006215	3.5	-1	1	21	15	35	UGCAUUUGCACCUGCACUUUA	:::: : ::: :::::::::	CAAAGAGGAGGAGCAAAUGCA	Translation	locus=Chr06:7083522:7085003:-	1
gma-miR530d	DACA006215	3.5	-1	1	21	15	35	UGCAUUUGCACCUGCACUUUA	:::: : ::: :::::::::	CAAAGAGGAGGAGCAAAUGCA	Translation	locus=Chr06:7083522:7085003:-	1
gma-miR530e	DACA006215	3.5	-1	1	21	15	35	UGCAUUUGCACCUGCACUUUA	:::: : ::: :::::::::	CAAAGAGGAGGAGCAAAUGCA	Translation	locus=Chr06:7083522:7085003:-	1
gma-miR9723	DACA005525	3.5	-1	1	21	832	852	CAAAGGAGAUUUGGACAACUC	:: : :::::::: ::::::	AAGAUCUCCAAAUCACCUUUG	Cleavage	locus=Chr12:8111140:8126508:-	1
gma-miR9742	DACA015342	3.5	-1	1	21	1789	1809	UGUGUUGUUUGUUUUGUAGCA	.: ::::.::.::.:::.:	GAUUCCAAAGCAGACGACAUA	Cleavage	locus=Chr07:24317952:24325668:-	1
gma-miR9752	DACA023137	3.5	-1	1	21	456	476	UGCUUCUUCUUUUCCCUGUUU	:: :::::::.::::::	CCUCAAGGAAAAGGAGAAGCU	Cleavage	locus=Chr08:784609:787172:-	1
gra-miR8722	DACA000927	3.5	-1	1	22	375	396	CAUGUUUUUCCUGUUCAUCUUC	::::::::: : :.::::::::	GAAGAUGAAAAUGGAAAACAUG	Translation	locus=Chr10:17698392:17699669:-	1
gra-miR8748	DACA005525	3.5	-1	1	24	1007	1031	UCGGUGGAGAUGGAUAAAAU-GAAU	:::: .:::::::.::::::: ::	AUUCUGUUUUAUCUAUCUCCAAGGA	Cleavage	locus=Chr12:8111140:8126508:-	1
gra-miR8758	DACA023137	3.5	-1	1	24	117	140	UGGGCUUCUUGCAAGAUGAAGGUA	::: .:: :::::::.:::	CAUGGUCAAUUUUCAAGAAGUCCA	Cleavage	locus=Chr08:784609:787172:-	1
hme-miR-14	DACA006215	3.5	-1	1	22	221	242	UCAGUCUUUUUCUCUCUCCUAU	:.::::.::::..::: .:::	UUGGGAGGGAGAGGAAGCUUGA	Cleavage	locus=Chr06:7083522:7085003:-	1
hme-miR-279c	DACA013923	3.5	-1	1	22	216	237	UGACUAGAUUUUCACUUAUCCU	:: ::::::::::.:.::.	GCGACAAGUGAAAAUUUGGUUU	Cleavage	locus=Chr06:12489975:12490847:+	1
hme-miR-283	DACA015342	3.5	-1	1	21	2391	2411	UAAAUAUCAGCUGGUAAUUCU	: ::::::::::.: :::.	GUAUUUACCAGCUGGUCUUUG	Cleavage	locus=Chr07:24317952:24325668:-	1
hme-miR-6302-3p	DACA023137	3.5	-1	1	22	175	196	CAAACUCAUCGUCAGCCUUCUC	:: . ::::::.::::: ::::	GAAGCGGCUGAUGAUGAUUUUG	Cleavage	locus=Chr08:784609:787172:-	1
hme-miR-6309-3p	DACA012489	3.5	-1	1	22	6	27	AUGGUCUUCAUUUUCUACUUCG	.:: :.:::::: ::::::	GUUGGUCGGAAAUGAUGACCAU	Cleavage	locus=Chr04:27666731:27668717:+	1
hme-miR-981	DACA010840	3.5	-1	1	22	9	30	UUCGUUGUCGACGAAACCUGCA	:: .:: ::.:::::::..:.:	UGGGGGAUUUGUCGACAGUGGA	Cleavage	locus=Chr04:24213209:24217283:-	1
hvu-miR397a	DACA002672	3.5	-1	1	21	1125	1145	CCGUUGAGUGCAGCGUUGAUG	:.:::: :::::::::::	UUUUAACGAGGCACUCAACGG	Cleavage	locus=Chr07:12662273:12669644:-	1
hvu-miR444b	DACA015342	3.5	-1	1	21	381	401	UGCAGUUGCUGUCUCAAGCUU	: :: :.:::::::::::	AUACAUGCGGCAGCAACUGCA	Cleavage	locus=Chr07:24317952:24325668:-	1
mes-miR169i	DACA002429	3.5	-1	1	21	1247	1267	GAGCCAAGAAUGACUUGCCGG	.::: .:::::: ::::::.	AUGGCUGGUCAUUGUUGGCUU	Cleavage	locus=Chr11:16707398:16716252:-	1
mes-miR169j	DACA002429	3.5	-1	1	21	1247	1267	GAGCCAAGAAUGACUUGCCGG	.::: .:::::: ::::::.	AUGGCUGGUCAUUGUUGGCUU	Cleavage	locus=Chr11:16707398:16716252:-	1
mes-miR169k	DACA002429	3.5	-1	1	21	1247	1267	GAGCCAAGAAUGACUUGCCGG	.::: .:::::: ::::::.	AUGGCUGGUCAUUGUUGGCUU	Cleavage	locus=Chr11:16707398:16716252:-	1
mes-miR169n	DACA002429	3.5	-1	1	21	1247	1267	GAGCCAAGAAUGACUUGCCGA	.::: .:::::: ::::::.	AUGGCUGGUCAUUGUUGGCUU	Cleavage	locus=Chr11:16707398:16716252:-	1
mtr-miR169d-5p	DACA002429	3.5	-1	1	21	1247	1267	AAGCCAAGGAUGACUUGCCGG	.::: .:::::. :::::::	AUGGCUGGUCAUUGUUGGCUU	Cleavage	locus=Chr11:16707398:16716252:-	1
mtr-miR169f	DACA002429	3.5	-1	1	21	1247	1267	AAGCCAAGGAUGACUUGCCUA	::: .:::::. :::::::	AUGGCUGGUCAUUGUUGGCUU	Cleavage	locus=Chr11:16707398:16716252:-	1
mtr-miR2596	DACA015668	3.5	-1	1	21	1245	1265	UCUAUUUCAUUGUUCCACACA	:: : ::..:::.::::::	GAUGGGAAAUGAUGGAAUAGA	Cleavage	locus=Chr08:11066706:11074546:-	1
mtr-miR2673a	DACA006215	3.5	-1	1	22	120	141	CCUCUUCCUCUUCCUCUUCCAC	:::::. ::.:::::.:::	AGGGAAGGUGAGGAGGAGGAGA	Cleavage	locus=Chr06:7083522:7085003:-	2
mtr-miR2673a	DACA023137	3.5	-1	1	22	751	772	CCUCUUCCUCUUCCUCUUCCAC	::.: :::.:::::.:::	UGCGAGGCGGAGGAGGAGGAGC	Cleavage	locus=Chr08:784609:787172:-	1
mtr-miR2673a	DACA000653	3.5	-1	1	22	57	78	CCUCUUCCUCUUCCUCUUCCAC	:: :.::.::: :::::::	GCAGAUGGGGGAGAAGAAGAGG	Cleavage	locus=Chr07:16064301:16065225:-	1
mtr-miR2673b	DACA006215	3.5	-1	1	22	120	141	CCUCUUCCUCUUCCUCUUCCAC	:::::. ::.:::::.:::	AGGGAAGGUGAGGAGGAGGAGA	Cleavage	locus=Chr06:7083522:7085003:-	2
mtr-miR2673b	DACA023137	3.5	-1	1	22	751	772	CCUCUUCCUCUUCCUCUUCCAC	::.: :::.:::::.:::	UGCGAGGCGGAGGAGGAGGAGC	Cleavage	locus=Chr08:784609:787172:-	1
mtr-miR2673b	DACA000653	3.5	-1	1	22	57	78	CCUCUUCCUCUUCCUCUUCCAC	:: :.::.::: :::::::	GCAGAUGGGGGAGAAGAAGAGG	Cleavage	locus=Chr07:16064301:16065225:-	1
mtr-miR530	DACA006215	3.5	-1	1	21	15	35	UGCAUUUGCACCUGCACUUUC	:::: : ::: :::::::::	CAAAGAGGAGGAGCAAAUGCA	Translation	locus=Chr06:7083522:7085003:-	1
nta-miR6144	DACA008395	3.5	-1	1	21	137	157	UGGCAACUUCUUCAUCAUGCC	: :::::::::::::: :	AUGAAGAUGAAGAAGUUGCGA	Cleavage	locus=Chr09:5737728:5738557:-	1
nta-miR6144	DACA008394	3.5	-1	1	21	137	157	UGGCAACUUCUUCAUCAUGCC	: :::::::::::::: :	AUGAAGAUGAAGAAGUUGCGA	Cleavage	locus=Chr09:5741597:5742470:-	1
osa-miR166k-5p	DACA013364	3.5	-1	1	21	258	278	GGUUUGUUGUCUGGCUCGAGG	..::::::.::. :::::.:.	UUUCGAGCUAGGGAACAAGCU	Cleavage	locus=Chr11:7402726:7404164:-	1
osa-miR172c	DACA002429	3.5	-1	1	21	2185	2205	UGAAUCUUGAUGAUGCUGCAC	: ..::::::::::::: ::	CUAUGGCAUCAUCAAGAUGCA	Cleavage	locus=Chr11:16707398:16716252:-	1
osa-miR1857-5p	DACA021755	3.5	-1	1	21	1827	1847	UGGUUUUUUUGGAGCAUGAGG	::::: ::::::.:.:.:..	GCUCAUCCUCCAAGAGAGCUG	Cleavage	locus=Chr09:9598434:9601733:-	1
osa-miR2097-3p	DACA015960	3.5	-1	1	20	1	20	UUCUCUUCUUCGUGUCGCAU	::: :: :: ::::::::::	AUGAGAAACAAAGAAGAGAA	Translation	locus=Chr03:18533366:18534449:+	1
osa-miR2275d	DACA015342	3.5	-1	1	22	318	339	CUUGUUUUUCUCCAAUAUCUCA	: :. :::::.:::::.::	GCUGUUGAUGGAGGAAAACGAG	Cleavage	locus=Chr07:24317952:24325668:-	1
osa-miR2876-5p	DACA004061	3.5	-1	1	21	164	184	AAUUGCUGGCAGCACUGUUUA	::::::::::...:..::	ACAACAGUGCUGUUGGUGAUG	Cleavage	locus=Chr03:20116171:20117182:+	1
osa-miR2905	DACA006215	3.5	-1	1	21	381	401	UACAUGUCAGUGACAAAGGCA	::: ::::..:::::: :::	GGCCAUUGUUGCUGACAAGUA	Cleavage	locus=Chr06:7083522:7085003:-	1
osa-miR395b	DACA005525	3.5	-1	1	21	1519	1539	GUGAAGUGUUUGGGGGAACUC	:::::. :.:::.::.::::.	GAGUUUGCUCAAGCAUUUCAU	Cleavage	locus=Chr12:8111140:8126508:-	1
osa-miR395d	DACA005525	3.5	-1	1	21	1519	1539	GUGAAGUGUUUGGGGGAACUC	:::::. :.:::.::.::::.	GAGUUUGCUCAAGCAUUUCAU	Cleavage	locus=Chr12:8111140:8126508:-	1
osa-miR395e	DACA005525	3.5	-1	1	21	1519	1539	GUGAAGUGUUUGGGGGAACUC	:::::. :.:::.::.::::.	GAGUUUGCUCAAGCAUUUCAU	Cleavage	locus=Chr12:8111140:8126508:-	1
osa-miR395g	DACA005525	3.5	-1	1	21	1519	1539	GUGAAGUGUUUGGGGGAACUC	:::::. :.:::.::.::::.	GAGUUUGCUCAAGCAUUUCAU	Cleavage	locus=Chr12:8111140:8126508:-	1
osa-miR395h	DACA005525	3.5	-1	1	21	1519	1539	GUGAAGUGUUUGGGGGAACUC	:::::. :.:::.::.::::.	GAGUUUGCUCAAGCAUUUCAU	Cleavage	locus=Chr12:8111140:8126508:-	1
osa-miR395i	DACA005525	3.5	-1	1	21	1519	1539	GUGAAGUGUUUGGGGGAACUC	:::::. :.:::.::.::::.	GAGUUUGCUCAAGCAUUUCAU	Cleavage	locus=Chr12:8111140:8126508:-	1
osa-miR395j	DACA005525	3.5	-1	1	21	1519	1539	GUGAAGUGUUUGGGGGAACUC	:::::. :.:::.::.::::.	GAGUUUGCUCAAGCAUUUCAU	Cleavage	locus=Chr12:8111140:8126508:-	1
osa-miR395k	DACA005525	3.5	-1	1	21	1519	1539	GUGAAGUGUUUGGGGGAACUC	:::::. :.:::.::.::::.	GAGUUUGCUCAAGCAUUUCAU	Cleavage	locus=Chr12:8111140:8126508:-	1
osa-miR395l	DACA005525	3.5	-1	1	21	1519	1539	GUGAAGUGUUUGGGGGAACUC	:::::. :.:::.::.::::.	GAGUUUGCUCAAGCAUUUCAU	Cleavage	locus=Chr12:8111140:8126508:-	1
osa-miR395m	DACA005525	3.5	-1	1	21	1519	1539	GUGAAGUGUUUGGGGGAACUC	:::::. :.:::.::.::::.	GAGUUUGCUCAAGCAUUUCAU	Cleavage	locus=Chr12:8111140:8126508:-	1
osa-miR395n	DACA005525	3.5	-1	1	21	1519	1539	GUGAAGUGUUUGGGGGAACUC	:::::. :.:::.::.::::.	GAGUUUGCUCAAGCAUUUCAU	Cleavage	locus=Chr12:8111140:8126508:-	1
osa-miR395p	DACA005525	3.5	-1	1	21	1519	1539	GUGAAGUGUUUGGGGGAACUC	:::::. :.:::.::.::::.	GAGUUUGCUCAAGCAUUUCAU	Cleavage	locus=Chr12:8111140:8126508:-	1
osa-miR395q	DACA005525	3.5	-1	1	21	1519	1539	GUGAAGUGUUUGGGGGAACUC	:::::. :.:::.::.::::.	GAGUUUGCUCAAGCAUUUCAU	Cleavage	locus=Chr12:8111140:8126508:-	1
osa-miR395r	DACA005525	3.5	-1	1	21	1519	1539	GUGAAGUGUUUGGGGGAACUC	:::::. :.:::.::.::::.	GAGUUUGCUCAAGCAUUUCAU	Cleavage	locus=Chr12:8111140:8126508:-	1
osa-miR395s	DACA005525	3.5	-1	1	21	1519	1539	GUGAAGUGUUUGGGGGAACUC	:::::. :.:::.::.::::.	GAGUUUGCUCAAGCAUUUCAU	Cleavage	locus=Chr12:8111140:8126508:-	1
osa-miR395y	DACA005525	3.5	-1	1	21	1519	1539	GUGAAGUGUUUGGGGGAACUC	:::::. :.:::.::.::::.	GAGUUUGCUCAAGCAUUUCAU	Cleavage	locus=Chr12:8111140:8126508:-	1
osa-miR444f	DACA015342	3.5	-1	1	21	381	401	UGCAGUUGUUGCCUCAAGCUU	: :: ::::.::::::::	AUACAUGCGGCAGCAACUGCA	Cleavage	locus=Chr07:24317952:24325668:-	1
osa-miR5493	DACA018089	3.5	-1	1	21	1303	1323	AGCCGGGCUCGGUCGCGCGUG	:: .:::::::::::: :.:	AACUUGCGACCGAGCCCCGUU	Cleavage	locus=Chr11:2157606:2162912:+	1
osa-miR5819	DACA020351	3.5	-1	1	21	39	59	AGGACGAGGGGAACGGCGGCG	::::: ::.:.:::: :::	UCCCGCCCUUUCUCUCGCCCU	Cleavage	locus=Chr10:543702:547889:+	1
osa-miR5819	DACA025095	3.5	-1	1	21	39	59	AGGACGAGGGGAACGGCGGCG	::::: ::.:.:::: :::	UCCCGCCCUUUCUCUCGCCCU	Cleavage	locus=Chr52:553692:557879:+	1
osa-miR5833	DACA006215	3.5	-1	1	21	333	353	UCCUCCUCGGGCUCAUCGGGC	: :: : :::.:::::::::	GACCAAGCAGCUCGAGGAGGA	Cleavage	locus=Chr06:7083522:7085003:-	1
peu-miR2916	DACA006946	3.5	-1	1	23	704	726	UGGGGACUCGAAGACGAUCAUAU	::: ::::.:::::..::	UGGAUAUCAUCUUUGAGUCUUCA	Cleavage	locus=Chr06:19306094:19307032:-	1
ppt-miR1028c-5p	DACA002429	3.5	-1	1	21	2045	2065	UCUUAGAUCUACAAUGCCUCU	.::::::: .::::::::	GUGGGCAUUGGGGAUCUAAGC	Translation	locus=Chr11:16707398:16716252:-	1
ppt-miR1039-5p	DACA005525	3.5	-1	1	21	89	109	UCUUUGGGUCUUUCUCUCCUG	: : ::::::: ::::::::	CUGAAGAGAAAUACCCAAAGC	Translation	locus=Chr12:8111140:8126508:-	1
ppt-miR390c-5p	DACA005525	3.5	-1	1	21	3010	3030	GAGCUCAGGAGGGAUAGCGCC	::.:: ::.:.::.::::::.	GGUGCCAUUCUUCUUGAGCUU	Cleavage	locus=Chr12:8111140:8126508:-	1
ptc-miR1444a	DACA005525	3.5	-1	1	20	300	319	UCCACAUUCGGUCAAUGUUC	::: ::::: ::::::::	AAACUGUGACCAAAUGUGGA	Cleavage	locus=Chr12:8111140:8126508:-	1
ptc-miR169o	DACA002429	3.5	-1	1	21	1247	1267	AAGCCAAGGAUGACUUGCCUG	::: .:::::. :::::::	AUGGCUGGUCAUUGUUGGCUU	Cleavage	locus=Chr11:16707398:16716252:-	1
ptc-miR169t	DACA002429	3.5	-1	1	21	1247	1267	GAGCCAAGAAUGACUUGCCGG	.::: .:::::: ::::::.	AUGGCUGGUCAUUGUUGGCUU	Cleavage	locus=Chr11:16707398:16716252:-	1
ptc-miR394a-3p	DACA018089	3.5	-1	1	20	637	656	CUGUUGGUCUCUCUUUGUAA	:::.:. :::::.:.::::	CUACGAGAAGAGAUCGACAG	Cleavage	locus=Chr11:2157606:2162912:+	2
ptc-miR394b-3p	DACA018089	3.5	-1	1	20	637	656	CUGUUGGUCUCUCUUUGUAA	:::.:. :::::.:.::::	CUACGAGAAGAGAUCGACAG	Cleavage	locus=Chr11:2157606:2162912:+	2
ptc-miR473a-5p	DACA015668	3.5	-1	1	20	1518	1537	ACUCUCCCUCAAGGCUUCCA	:::::::.:::.:::: ::	UGGAAGCUUUGGGGGACAGG	Cleavage	locus=Chr08:11066706:11074546:-	1
ptc-miR478d	DACA017499	3.5	-1	1	24	10	33	UGACAUGUCUUCUAUUUUUAGUAA	.:::. :::.:::::::::.	GGUUUAAGCUUAGGAGACAUGUCG	Cleavage	locus=Chr09:10624920:10626582:-	1
ptc-miR478f	DACA017499	3.5	-1	1	24	10	33	UGACAUGUCUUCUAUUUUUAGGGA	..:::. :::.:::::::::.	GGUUUAAGCUUAGGAGACAUGUCG	Cleavage	locus=Chr09:10624920:10626582:-	1
ptc-miR6423	DACA017499	3.5	-1	1	22	133	154	CCGCUGUCGCCACUAUCUUCCU	:.::::.:::: :.:.::::	GAGGAGAUGGUGGAGGCGGCGG	Cleavage	locus=Chr09:10624920:10626582:-	1
sbi-miR172e	DACA002429	3.5	-1	1	21	2185	2205	UGAAUCUUGAUGAUGCUGCAC	: ..::::::::::::: ::	CUAUGGCAUCAUCAAGAUGCA	Cleavage	locus=Chr11:16707398:16716252:-	1
sbi-miR395a	DACA005525	3.5	-1	1	21	1519	1539	GUGAAGUGUUUGGGGGAACUC	:::::. :.:::.::.::::.	GAGUUUGCUCAAGCAUUUCAU	Cleavage	locus=Chr12:8111140:8126508:-	1
sbi-miR395b	DACA005525	3.5	-1	1	21	1519	1539	GUGAAGUGUUUGGGGGAACUC	:::::. :.:::.::.::::.	GAGUUUGCUCAAGCAUUUCAU	Cleavage	locus=Chr12:8111140:8126508:-	1
sbi-miR395c	DACA005525	3.5	-1	1	21	1519	1539	GUGAAGUGUUUGGGGGAACUC	:::::. :.:::.::.::::.	GAGUUUGCUCAAGCAUUUCAU	Cleavage	locus=Chr12:8111140:8126508:-	1
sbi-miR395d	DACA005525	3.5	-1	1	21	1519	1539	GUGAAGUGUUUGGGGGAACUC	:::::. :.:::.::.::::.	GAGUUUGCUCAAGCAUUUCAU	Cleavage	locus=Chr12:8111140:8126508:-	1
sbi-miR395e	DACA005525	3.5	-1	1	21	1519	1539	GUGAAGUGUUUGGGGGAACUC	:::::. :.:::.::.::::.	GAGUUUGCUCAAGCAUUUCAU	Cleavage	locus=Chr12:8111140:8126508:-	1
sbi-miR395g	DACA005525	3.5	-1	1	21	1519	1539	GUGAAGUGUUUGGGGGAACUC	:::::. :.:::.::.::::.	GAGUUUGCUCAAGCAUUUCAU	Cleavage	locus=Chr12:8111140:8126508:-	1
sbi-miR395h	DACA005525	3.5	-1	1	21	1519	1539	GUGAAGUGUUUGGGGGAACUC	:::::. :.:::.::.::::.	GAGUUUGCUCAAGCAUUUCAU	Cleavage	locus=Chr12:8111140:8126508:-	1
sbi-miR395i	DACA005525	3.5	-1	1	21	1519	1539	GUGAAGUGUUUGGGGGAACUC	:::::. :.:::.::.::::.	GAGUUUGCUCAAGCAUUUCAU	Cleavage	locus=Chr12:8111140:8126508:-	1
sbi-miR395j	DACA005525	3.5	-1	1	21	1519	1539	GUGAAGUGUUUGGGGGAACUC	:::::. :.:::.::.::::.	GAGUUUGCUCAAGCAUUUCAU	Cleavage	locus=Chr12:8111140:8126508:-	1
sbi-miR5385	DACA025095	3.5	-1	1	22	90	111	ACCACCAACCCCACCGCUUCUC	:.::::.::::: : :::::::	GGGAAGUGGUGGUGCUGGUGGU	Translation	locus=Chr52:553692:557879:+	1
sbi-miR5385	DACA020351	3.5	-1	1	22	126	147	ACCACCAACCCCACCGCUUCUC	:.::::.::::: : :::::::	GGGAAGUGGUGGUGCUGGUGGU	Translation	locus=Chr10:543702:547889:+	1
sbi-miR6221-3p	DACA018179	3.5	-1	1	21	801	821	CCGGGGCCAGAUCUCAGAAGC	::::.::::.:::: :.:.::	GCUUUUGAGGUCUGUCUCUGG	Cleavage	locus=Chr01:14603431:14609298:+	1
sly-miR6024	DACA022464	3.5	-1	1	22	316	337	UUUUAGCAAGAGUUGUUUUACC	:: ::::::::::. .:::	GAAAAUACAACUCUUGUAGAAA	Cleavage	locus=Chr03:28715628:28717834:+	1
smo-miR1082a	DACA008865	3.5	-1	1	21	2328	2348	GCGUUGGCCUGCUGGCCGGUG	:.::: ::::::: .::.:::	CGCCGUCCAGCAGAUCAGCGC	Cleavage	locus=Chr10:9714453:9720437:+	1
smo-miR1084	DACA008865	3.5	-1	1	22	1206	1227	UAACUCAGGUGGUAUGUUCCCA	:: ::::.::::::.: ::	UCAGAUCAUAUCACCUGGGGUA	Cleavage	locus=Chr10:9714453:9720437:+	1
smo-miR1086	DACA005431	3.5	-1	1	21	314	334	UAGUGCCGUGGUCCUUUUGGC	::::::::::.::: :.::	UCCAAAAGGACUACGACGCUC	Cleavage	locus=Chr12:6847830:6850879:-	1
smo-miR1088-5p	DACA022106	3.5	-1	1	21	216	236	CAGAAGAAAGAGAGCACGCAU	::::: :::::: :::::	CAGCGUGGUCUCUUCCUUCUC	Cleavage	locus=Chr06:11266475:11267521:-	1
smo-miR319	DACA002429	3.5	-1	1	20	154	173	UGCUGCCGACUCAUGCAUCC	: : :::: ::::::::::	AGCUCCAUGCGUCGGCAGCA	Translation	locus=Chr11:16707398:16716252:-	1
ssp-miR444a	DACA015342	3.5	-1	1	21	381	401	UGCAGUUGUUGCCUCAAGCUU	: :: ::::.::::::::	AUACAUGCGGCAGCAACUGCA	Cleavage	locus=Chr07:24317952:24325668:-	1
ssp-miR444b.2	DACA015342	3.5	-1	1	21	381	401	UGCAGUUGUUGCCUCAAGCUU	: :: ::::.::::::::	AUACAUGCGGCAGCAACUGCA	Cleavage	locus=Chr07:24317952:24325668:-	1
stu-miR6024-3p	DACA022464	3.5	-1	1	22	316	337	UUUUAGCAAGAGUUGUUUUCCC	:: ::::::::::. .:::	GAAAAUACAACUCUUGUAGAAA	Cleavage	locus=Chr03:28715628:28717834:+	1
stu-miR8002-3p	DACA015668	3.5	-1	1	24	2307	2330	AUUCCAUUAUUAUCAAGAAAAAAG	::.: :::.:::::::.:	GAAAAUUUUCGAUGAUAAUGGGAA	Cleavage	locus=Chr08:11066706:11074546:-	1
tae-miR395a	DACA005525	3.5	-1	1	21	1519	1539	GUGAAGUGUUUGGGGGAACUC	:::::. :.:::.::.::::.	GAGUUUGCUCAAGCAUUUCAU	Cleavage	locus=Chr12:8111140:8126508:-	1
tae-miR9652-5p	DACA001730	3.5	-1	1	22	148	169	CCUGUUUGUCAUUAAGUUUCUU	:. :..:: :.::::.:.::::	AGAAGGCUGAGUGACGAGCAGG	Cleavage	locus=Chr03:13773813:13775310:+	1
tae-miR9674a-5p	DACA002672	3.5	-1	1	21	1176	1196	GCAUCAUCCAUCCUACCAUUC	:::: :.:::: :::::::.	AAAUGAUGGGAUAGAUGAUGU	Cleavage	locus=Chr07:12662273:12669644:-	1
tae-miR9773	DACA017499	3.5	-1	1	24	64	87	UUUGUUUUUAUGUUAUUUUGUGAA	::.: :: ::.::::::::	AAUGAAAGAAAAGAUGAAAACAAA	Cleavage	locus=Chr09:10624920:10626582:-	1
vvi-miR169i	DACA002429	3.5	-1	1	21	1247	1267	GAGCCAAGGAUGACUGGCCGU	:.:::..:::::. ::::::.	AUGGCUGGUCAUUGUUGGCUU	Cleavage	locus=Chr11:16707398:16716252:-	1
vvi-miR3624-3p	DACA005525	3.5	-1	1	21	122	142	UCAGGGCAGCAGCAUACUACU	: ::::::::: ::::::	AAGACUAUGCUGCUUCCCUGA	Cleavage	locus=Chr12:8111140:8126508:-	1
zma-miR2275a-3p	DACA015342	3.5	-1	1	22	318	339	UUUGUUUUCCUCCAAUAUCUCA	: :. :::::::::::.:.	GCUGUUGAUGGAGGAAAACGAG	Cleavage	locus=Chr07:24317952:24325668:-	1
zma-miR395a-3p	DACA005525	3.5	-1	1	21	1519	1539	GUGAAGUGUUUGGGGGAACUC	:::::. :.:::.::.::::.	GAGUUUGCUCAAGCAUUUCAU	Cleavage	locus=Chr12:8111140:8126508:-	1
zma-miR395b-3p	DACA005525	3.5	-1	1	21	1519	1539	GUGAAGUGUUUGGGGGAACUC	:::::. :.:::.::.::::.	GAGUUUGCUCAAGCAUUUCAU	Cleavage	locus=Chr12:8111140:8126508:-	1
zma-miR395d-3p	DACA005525	3.5	-1	1	21	1519	1539	GUGAAGUGUUUGGGGGAACUC	:::::. :.:::.::.::::.	GAGUUUGCUCAAGCAUUUCAU	Cleavage	locus=Chr12:8111140:8126508:-	1
zma-miR395e-3p	DACA005525	3.5	-1	1	21	1519	1539	GUGAAGUGUUUGGGGGAACUC	:::::. :.:::.::.::::.	GAGUUUGCUCAAGCAUUUCAU	Cleavage	locus=Chr12:8111140:8126508:-	1
zma-miR395f-3p	DACA005525	3.5	-1	1	21	1519	1539	GUGAAGUGUUUGGGGGAACUC	:::::. :.:::.::.::::.	GAGUUUGCUCAAGCAUUUCAU	Cleavage	locus=Chr12:8111140:8126508:-	1
zma-miR395g-3p	DACA005525	3.5	-1	1	21	1519	1539	GUGAAGUGUUUGGGGGAACUC	:::::. :.:::.::.::::.	GAGUUUGCUCAAGCAUUUCAU	Cleavage	locus=Chr12:8111140:8126508:-	1
zma-miR395h-3p	DACA005525	3.5	-1	1	21	1519	1539	GUGAAGUGUUUGGGGGAACUC	:::::. :.:::.::.::::.	GAGUUUGCUCAAGCAUUUCAU	Cleavage	locus=Chr12:8111140:8126508:-	1
zma-miR395i-3p	DACA005525	3.5	-1	1	21	1519	1539	GUGAAGUGUUUGGGGGAACUC	:::::. :.:::.::.::::.	GAGUUUGCUCAAGCAUUUCAU	Cleavage	locus=Chr12:8111140:8126508:-	1
zma-miR395j-3p	DACA005525	3.5	-1	1	21	1519	1539	GUGAAGUGUUUGGGGGAACUC	:::::. :.:::.::.::::.	GAGUUUGCUCAAGCAUUUCAU	Cleavage	locus=Chr12:8111140:8126508:-	1
zma-miR395n-3p	DACA005525	3.5	-1	1	21	1519	1539	GUGAAGUGUUUGGGGGAACUC	:::::. :.:::.::.::::.	GAGUUUGCUCAAGCAUUUCAU	Cleavage	locus=Chr12:8111140:8126508:-	1
zma-miR395p-3p	DACA005525	3.5	-1	1	21	1519	1539	GUGAAGUGUUUGGGGGAACUC	:::::. :.:::.::.::::.	GAGUUUGCUCAAGCAUUUCAU	Cleavage	locus=Chr12:8111140:8126508:-	1
zma-miR399a-5p	DACA008865	3.5	-1	1	21	2001	2021	GUGCGGUUCUCCUCUGGCACG	:::.: ::::::.: ::::	GAUGCUACAGGAGAGCAGCAC	Cleavage	locus=Chr10:9714453:9720437:+	1
zma-miR399b-5p	DACA006153	3.5	-1	1	21	141	161	GUGCAGCUCUCCUCUGGCAUG	.:::.:::::::::.: ::	AGUGCUAGAGGAGAGUUUCAG	Cleavage	locus=Chr05:26188498:26189591:+	1
zma-miR399d-5p	DACA008865	3.5	-1	1	21	2001	2021	GUGUGGCUCUCCUCUGGCAUG	::::.: :::::::: .:::	GAUGCUACAGGAGAGCAGCAC	Cleavage	locus=Chr10:9714453:9720437:+	1
zma-miR399h-5p	DACA008865	3.5	-1	1	21	2001	2021	GUGCAGUUCUCCUCUGGCACG	:::.: ::::::.: ::::	GAUGCUACAGGAGAGCAGCAC	Cleavage	locus=Chr10:9714453:9720437:+	1
ahy-miR156c	DACA015342	4	-1	1	21	2493	2513	UUGACAGAAGAGAGAGAGCAC	: : .::::::.::::::	UCUCGCCUUCUCUUUUGUCAA	Cleavage	locus=Chr07:24317952:24325668:-	1
aly-miR156g-3p	DACA018089	4	-1	1	21	1568	1588	GCUUACUCUCUUCUUGUCUCC	:: :::::::.::: :::	CAAGCCAAGAAGGGAGGAAGA	Cleavage	locus=Chr11:2157606:2162912:+	1
aly-miR156h-3p	DACA010840	4	-1	1	21	819	838	GCUCUCUUUCCUUCUGCCACC	: :::: : :::::::.::::	GAUGGC-GCAGGAAAGGGAGC	Cleavage	locus=Chr04:24213209:24217283:-	1
aly-miR3441-3p.2	DACA008395	4	-1	1	21	133	153	AACGACUUCAUCUUCUUUGCU	::::: :::::::::: :::	AGCAAUGAAGAUGAAGAAGUU	Cleavage	locus=Chr09:5737728:5738557:-	1
aly-miR3441-3p.2	DACA008394	4	-1	1	21	133	153	AACGACUUCAUCUUCUUUGCU	::::: :::::::::: :::	AGCAAUGAAGAUGAAGAAGUU	Cleavage	locus=Chr09:5741597:5742470:-	1
aly-miR3441-3p.2	DACA017499	4	-1	1	21	196	216	AACGACUUCAUCUUCUUUGCU	:..::::: :::::: :::	GACGGAGAAGUUGAAGUAGUU	Translation	locus=Chr09:10624920:10626582:-	1
aly-miR3441-5p.2	DACA021755	4	-1	1	21	1670	1690	CGAAGAAAAUGAAGUCGUUUU	::::.: ::::: :::::::	AAAAUGUCUUCAAUUUCUUCA	Cleavage	locus=Chr09:9598434:9601733:-	1
aly-miR3442-3p	DACA002429	4	-1	1	21	819	839	UUCAGAGUCUAAACAUGGUGU	:.. :: :::.::::::::.	UCGUGAUUUUUGGACUCUGAG	Cleavage	locus=Chr11:16707398:16716252:-	1
aly-miR395d-3p	DACA005525	4	-1	1	21	1519	1539	CUGAAGUGUUUGGGGGAACUC	:::::. :.:::.::.::::	GAGUUUGCUCAAGCAUUUCAU	Cleavage	locus=Chr12:8111140:8126508:-	1
aly-miR395e-3p	DACA005525	4	-1	1	21	1519	1539	CUGAAGUGUUUGGGGGAACUC	:::::. :.:::.::.::::	GAGUUUGCUCAAGCAUUUCAU	Cleavage	locus=Chr12:8111140:8126508:-	1
aly-miR395g-3p	DACA005525	4	-1	1	21	1519	1539	CUGAAGUGUUUGGGGGAACUC	:::::. :.:::.::.::::	GAGUUUGCUCAAGCAUUUCAU	Cleavage	locus=Chr12:8111140:8126508:-	1
aly-miR4221	DACA002429	4	-1	1	22	816	837	AAGAGUUCAAAAGUAGUGAAGA	::.. :.:::::.:::::	UGCUCGUGAUUUUUGGACUCUG	Cleavage	locus=Chr11:16707398:16716252:-	1
aly-miR4224	DACA013364	4	-1	1	21	210	230	CAACUGAGCUUCCUCAUCUCU	::: :::::.:::::::	GAAGAAGAGGAGGCUCAGUGU	Cleavage	locus=Chr11:7402726:7404164:-	1
aly-miR4229	DACA021755	4	-1	1	22	1880	1901	UUGGCAGGGAGGUCCUCCACAC	:: :::::::::::::	CCCCGGUCGACCUCCCUGCCAU	Cleavage	locus=Chr09:9598434:9601733:-	1
aly-miR774a-3p.1	DACA008865	4	-1	1	21	163	183	UACCCAUAUCUCCAUCUCCAA	::::::::.:.:. ::::	GAGGAGAUGGGGGUGGGGGUU	Cleavage	locus=Chr10:9714453:9720437:+	1
aly-miR824-3p	DACA022106	4	-1	1	21	72	92	CCUUCUCAUCGAUGGUCUAGA	.:::.:.:: :: :::::::	GUUAGGCUAUGGAGGAGAAGG	Translation	locus=Chr06:11266475:11267521:-	1
aly-miR834-3p	DACA017499	4	-1	1	21	587	607	UGGUAGCAGUAGCGGUGGUAA	.::::::::.:::: ..:.	CCGCCACCGCUGCUGCCGUCG	Cleavage	locus=Chr09:10624920:10626582:-	1
aly-miR838-3p	DACA013364	4	-1	1	21	200	220	UUUUCUUCUUCUUCUUGCACA	::.:.:::::::::..:	AGAUCAGGGAGAAGAAGAGGA	Cleavage	locus=Chr11:7402726:7404164:-	1
aly-miR838-3p	DACA017378	4	-1	1	21	92	112	UUUUCUUCUUCUUCUUGCACA	::::..:::::.:::.:	ACAACAAGGGGAAGAGGAAGA	Cleavage	locus=Chr36:1289000:1289710:+	1
aly-miR838-3p	DACA001730	4	-1	1	21	94	114	UUUUCUUCUUCUUCUUGCACA	:..::.::.::.:::::.	AAGGUGAGGAGGAGGAGAAAG	Cleavage	locus=Chr03:13773813:13775310:+	1
aly-miR838-3p	DACA000929	4	-1	1	21	194	214	UUUUCUUCUUCUUCUUGCACA	::::::: ::::: ::::	AUAGCAAGAAUAAGAAUAAAA	Translation	locus=Chr10:17659209:17661561:-	1
aly-miR838-3p	DACA005525	4	-1	1	21	185	205	UUUUCUUCUUCUUCUUGCACA	: : :::.:::.::::.:.:	GGAGAAAGGAGAGGAAGGAGA	Cleavage	locus=Chr12:8111140:8126508:-	1
aqc-miR477c	DACA015341	4	-1	1	20	157	176	CUCUCCCUCAAGUUCUUCUA	: :::::::::: :::: ::	UUGAAGAACUUGUGGGAUAG	Cleavage	locus=Chr07:24309785:24310846:-	1
aqc-miR477d	DACA008395	4	-1	1	20	343	362	CUCUUCUUCAAAGGCUUCUA	:: .::..:::::::::: :	UACGAGUUUUUGAAGAAGUG	Cleavage	locus=Chr09:5737728:5738557:-	1
aqc-miR477g	DACA015341	4	-1	1	20	157	176	CUCUCCCUCAAGUUCUUCUA	: :::::::::: :::: ::	UUGAAGAACUUGUGGGAUAG	Cleavage	locus=Chr07:24309785:24310846:-	1
ata-miR168-5p	DACA020351	4	-1	1	21	547	567	UCGCUUGGUGCAGAUCGGGAC	::: ::::::::::: .:	AACCCCAUCUGCACCAACUGC	Cleavage	locus=Chr10:543702:547889:+	1
ata-miR168-5p	DACA010840	4	-1	1	21	490	510	UCGCUUGGUGCAGAUCGGGAC	::: ::::::::::: .:	AACCCAAUCUGCACCAACUGU	Cleavage	locus=Chr04:24213209:24217283:-	1
ata-miR168-5p	DACA025095	4	-1	1	21	511	531	UCGCUUGGUGCAGAUCGGGAC	::: ::::::::::: .:	AACCCCAUCUGCACCAACUGC	Cleavage	locus=Chr52:553692:557879:+	1
ata-miR2275a-3p	DACA015342	4	-1	1	22	318	339	UUUGUUUUUCUCCAAUAUCUCA	: :. :::::.:::::.:.	GCUGUUGAUGGAGGAAAACGAG	Cleavage	locus=Chr07:24317952:24325668:-	1
ath-miR395a	DACA005525	4	-1	1	21	1519	1539	CUGAAGUGUUUGGGGGAACUC	:::::. :.:::.::.::::	GAGUUUGCUCAAGCAUUUCAU	Cleavage	locus=Chr12:8111140:8126508:-	1
ath-miR395d	DACA005525	4	-1	1	21	1519	1539	CUGAAGUGUUUGGGGGAACUC	:::::. :.:::.::.::::	GAGUUUGCUCAAGCAUUUCAU	Cleavage	locus=Chr12:8111140:8126508:-	1
ath-miR395e	DACA005525	4	-1	1	21	1519	1539	CUGAAGUGUUUGGGGGAACUC	:::::. :.:::.::.::::	GAGUUUGCUCAAGCAUUUCAU	Cleavage	locus=Chr12:8111140:8126508:-	1
ath-miR397b	DACA002672	4	-1	1	21	1125	1145	UCAUUGAGUGCAUCGUUGAUG	:.::::: :::::::: :.	UUUUAACGAGGCACUCAACGG	Cleavage	locus=Chr07:12662273:12669644:-	1
ath-miR402	DACA002672	4	-1	1	22	630	651	UUCGAGGCCUAUUAAACCUCUG	: :: ::..::::.::.:::	UUGCGGCUUGGUAGGUCUUGAA	Cleavage	locus=Chr07:12662273:12669644:-	1
ath-miR414	DACA009322	4	-1	1	21	590	610	UCAUCUUCAUCAUCAUCGUCA	: ::.::: :.::::::::.	CGUCGGUGACGGUGAAGAUGG	Cleavage	locus=Chr09:14296476:14297507:-	1
ath-miR5022	DACA013924	4	-1	1	21	421	441	GUCAUGGGGUAUGAUCGAAUG	:::::::::: :::: .::.:	CAUUCGAUCAAACCCAGUGGC	Translation	locus=Chr06:12486019:12486945:-	1
ath-miR8181	DACA008865	4	-1	1	20	68	87	UGGGGGUGGGGGGGUGACAG	:::::.:::::.:.::.	UCUUCACCUCCCCAUCUCCG	Cleavage	locus=Chr10:9714453:9720437:+	1
ath-miR8183	DACA013924	4	-1	1	21	270	290	UUUAGUUGACGGAAUUGUGGC	:.::::::::: ::: ::.:	UCUACAAUUCCGACAAGUAGA	Cleavage	locus=Chr06:12486019:12486945:-	1
ath-miR822-3p	DACA010840	4	-1	1	21	881	901	UGUGCAAAUGCUUUCUACAGG	:: :. :.::.::::::.::	ACUAUGAAGAGUAUUUGCGCA	Cleavage	locus=Chr04:24213209:24217283:-	1
ath-miR824-3p	DACA022106	4	-1	1	21	72	92	CCUUCUCAUCGAUGGUCUAGA	.:::.:.:: :: :::::::	GUUAGGCUAUGGAGGAGAAGG	Translation	locus=Chr06:11266475:11267521:-	1
ath-miR834	DACA017499	4	-1	1	21	587	607	UGGUAGCAGUAGCGGUGGUAA	.::::::::.:::: ..:.	CCGCCACCGCUGCUGCCGUCG	Cleavage	locus=Chr09:10624920:10626582:-	1
ath-miR837-5p	DACA015668	4	-1	1	21	252	272	AUCAGUUUCUUGUUCGUUUCA	: :..:::.:.::::::::	GGCAGUGAAUAGGAAACUGAC	Cleavage	locus=Chr08:11066706:11074546:-	1
ath-miR851-5p	DACA017212	4	-1	1	21	253	273	UCUCGGUUCGCGAUCCACAAG	: :::.:: :::.:::::.	GAUUUGGGUCUCGAGCCGAGG	Translation	locus=Chr02:15648176:15651151:+	1
ath-miR861-3p	DACA018089	4	-1	1	21	583	603	GAUGGAUAUGUCUUCAAGGAC	: :::::.::: ::.::: ::	GCCCUUGGAGAGAUGUCCUUC	Translation	locus=Chr11:2157606:2162912:+	1
ath-miR866-5p	DACA017499	4	-1	1	21	261	281	UCAAGGAACGGAUUUUGUUAA	::::. :.::::.:::::	GGAACAGUCUUCGUUUCUUGA	Cleavage	locus=Chr09:10624920:10626582:-	1
bdi-miR166g-5p	DACA018089	4	-1	1	21	935	955	UCUGGUUCAAGGUCUCCACAU	::::::.:::::.: ::.	CGAUGGAGAUCUUGAGCGAGG	Cleavage	locus=Chr11:2157606:2162912:+	1
bdi-miR166h-5p	DACA013364	4	-1	1	21	258	278	GGUUUGUUGUCUGGCUCGGGG	...:::::.::. :::::.:.	UUUCGAGCUAGGGAACAAGCU	Cleavage	locus=Chr11:7402726:7404164:-	1
bdi-miR168-5p	DACA025095	4	-1	1	21	511	531	UCGCUUGGUGCAGAUCGGGAC	::: ::::::::::: .:	AACCCCAUCUGCACCAACUGC	Cleavage	locus=Chr52:553692:557879:+	1
bdi-miR168-5p	DACA020351	4	-1	1	21	547	567	UCGCUUGGUGCAGAUCGGGAC	::: ::::::::::: .:	AACCCCAUCUGCACCAACUGC	Cleavage	locus=Chr10:543702:547889:+	1
bdi-miR168-5p	DACA010840	4	-1	1	21	490	510	UCGCUUGGUGCAGAUCGGGAC	::: ::::::::::: .:	AACCCAAUCUGCACCAACUGU	Cleavage	locus=Chr04:24213209:24217283:-	1
bdi-miR169d	DACA002429	4	-1	1	21	1247	1267	UAGCCAAGAAUGACUUGCCUA	::: .:::::: ::::::	AUGGCUGGUCAUUGUUGGCUU	Cleavage	locus=Chr11:16707398:16716252:-	1
bdi-miR2118a	DACA015960	4	-1	1	22	645	666	UUUCCGAUGCCUCCCAUUCCUA	:. :::: :::::: :: ::::	UGAGAAUCGGAGGCUUCAGAAA	Cleavage	locus=Chr03:18533366:18534449:+	1
bdi-miR2118b	DACA015960	4	-1	1	22	645	666	UUCCUGAUGCCUCCCAUUCCUA	:. :::: :::::: :::: ::	UGAGAAUCGGAGGCUUCAGAAA	Cleavage	locus=Chr03:18533366:18534449:+	1
bdi-miR444c	DACA015342	4	-1	1	21	381	401	UGCAGUUGUUGUCUCAAGCUU	: :: :.::.::::::::	AUACAUGCGGCAGCAACUGCA	Cleavage	locus=Chr07:24317952:24325668:-	1
bdi-miR444d	DACA015342	4	-1	1	21	381	401	UGCAGUUGUUGUCUCAAGCUU	: :: :.::.::::::::	AUACAUGCGGCAGCAACUGCA	Cleavage	locus=Chr07:24317952:24325668:-	1
bdi-miR5058	DACA022464	4	-1	1	22	627	648	AACAGUUGAGGGAUGAAAAACA	::: : ::::.::::::: :	GCUUUGUGAUCCUUCAACUGAU	Cleavage	locus=Chr03:28715628:28717834:+	1
bdi-miR5163b-3p	DACA008865	4	-1	1	22	1210	1231	UAGAUAUUUCAGGUUGUGUGGA	.::.:. :::::...:::::.	AUCAUAUCACCUGGGGUAUCUG	Cleavage	locus=Chr10:9714453:9720437:+	1
bdi-miR5166	DACA002429	4	-1	1	21	2031	2051	UGCCCACCAGGGUUCGAUCCA	::: :: :.:::::::::	CCCAUCUAAACUUGGUGGGCA	Cleavage	locus=Chr11:16707398:16716252:-	1
bdi-miR5174d-3p	DACA005525	4	-1	1	24	2033	2055	CAAUCUUUAUGGAACGGAGAGAGU	::: :::: :: :::: ::::::	UCUC-CUCCUUUGCAUAUAGAUUG	Cleavage	locus=Chr12:8111140:8126508:-	1
bdi-miR7711-5p.2	DACA015668	4	-1	1	24	82	105	AUGAUAGAAUUUCUAAAUUAGAAG	:: :::..:::::::::	GAAGCUCUUGAGAGGUUCUAUCAU	Cleavage	locus=Chr08:11066706:11074546:-	1
bdi-miR7718-5p	DACA001730	4	-1	1	24	8	31	UCAUUUAUUCGUCCAUGGCGAUGG	:: :::::::::. :::::	UGGACGACAUGGACGAGCAAAUGC	Cleavage	locus=Chr03:13773813:13775310:+	1
bdi-miR7737-5p	DACA018179	4	-1	1	24	1655	1678	UUUCGGUCAAUGUAUUUCAAGCAG	: : ::.: ::::::: :.:.::	AUACAUGGACUACAUUGUCUGGAA	Cleavage	locus=Chr01:14603431:14609298:+	1
bdi-miR7741-5p.2	DACA015341	4	-1	1	21	63	83	UCUUGAAGUUUCGCAUGCAGU	::.:: . :.:::::::::	CGUGUAUUUCAGACUUCAAGA	Cleavage	locus=Chr07:24309785:24310846:-	1
bdi-miR7748a-3p	DACA000928	4	-1	1	24	462	485	AAUAUGUUUUCUAUUGUUGGACGG	:..: .::.::::::::::	GGAGCUGAGGAUGGAAAACAUAUG	Cleavage	locus=Chr10:17663768:17664732:-	1
bdi-miR7753-5p	DACA018089	4	-1	1	21	945	965	AUGUCUUCUUCCUUGCUCAUC	:::::.:::: ::. ::::	CUUGAGCGAGGAUGAGUACAU	Cleavage	locus=Chr11:2157606:2162912:+	1
bdi-miR7753-5p	DACA008865	4	-1	1	21	189	209	AUGUCUUCUUCCUUGCUCAUC	: : .: :::::.::.::.::	GUUAGGGAAGGAGGAGGAUAU	Cleavage	locus=Chr10:9714453:9720437:+	1
bdi-miR7779-5p	DACA021755	4	-1	1	24	1398	1421	GAGGUCAUUGUCAGACAUGGGAAG	::: :.:::::::..::::::	GUUCGCGUGUCUGAUGAUGACCGG	Cleavage	locus=Chr09:9598434:9601733:-	1
bna-miR1140	DACA008395	4	-1	1	21	27	48	ACAGCCUAAACCAA-UCGGAGC	:::. :: ::::::::::.:::	GCUUGGACUUGGUUUAGGUUGU	Cleavage	locus=Chr09:5737728:5738557:-	1
bna-miR1140	DACA008394	4	-1	1	21	27	48	ACAGCCUAAACCAA-UCGGAGC	:::. :: ::::::::::.:::	GCUUGGACUUGGUUUAGGUUGU	Cleavage	locus=Chr09:5741597:5742470:-	1
bna-miR395a	DACA005525	4	-1	1	21	1519	1539	CUGAAGUGUUUGGGGGAACUC	:::::. :.:::.::.::::	GAGUUUGCUCAAGCAUUUCAU	Cleavage	locus=Chr12:8111140:8126508:-	1
bna-miR395b	DACA005525	4	-1	1	21	1519	1539	CUGAAGUGUUUGGGGGAACUC	:::::. :.:::.::.::::	GAGUUUGCUCAAGCAUUUCAU	Cleavage	locus=Chr12:8111140:8126508:-	1
bna-miR395c	DACA005525	4	-1	1	21	1519	1539	CUGAAGUGUUUGGGGGAACUC	:::::. :.:::.::.::::	GAGUUUGCUCAAGCAUUUCAU	Cleavage	locus=Chr12:8111140:8126508:-	1
bra-miR1140	DACA008395	4	-1	1	21	27	48	ACAGCCUAAACCAA-UCGGAGC	:::. :: ::::::::::.:::	GCUUGGACUUGGUUUAGGUUGU	Cleavage	locus=Chr09:5737728:5738557:-	1
bra-miR1140	DACA008394	4	-1	1	21	27	48	ACAGCCUAAACCAA-UCGGAGC	:::. :: ::::::::::.:::	GCUUGGACUUGGUUUAGGUUGU	Cleavage	locus=Chr09:5741597:5742470:-	1
bra-miR395a-3p	DACA005525	4	-1	1	21	1519	1539	CUGAAGUGUUUGGGGGAACUC	:::::. :.:::.::.::::	GAGUUUGCUCAAGCAUUUCAU	Cleavage	locus=Chr12:8111140:8126508:-	1
bra-miR395b-3p	DACA005525	4	-1	1	21	1519	1539	CUGAAGUGUUUGGGGGAACUC	:::::. :.:::.::.::::	GAGUUUGCUCAAGCAUUUCAU	Cleavage	locus=Chr12:8111140:8126508:-	1
bra-miR395c-3p	DACA005525	4	-1	1	21	1519	1539	CUGAAGUGUUUGGGGGAACUC	:::::. :.:::.::.::::	GAGUUUGCUCAAGCAUUUCAU	Cleavage	locus=Chr12:8111140:8126508:-	1
bra-miR395d-3p	DACA005525	4	-1	1	21	1519	1539	CUGAAGUGUUUGGGGGAACUC	:::::. :.:::.::.::::	GAGUUUGCUCAAGCAUUUCAU	Cleavage	locus=Chr12:8111140:8126508:-	1
bra-miR9559-5p	DACA018089	4	-1	1	21	183	202	UUUGGAUUUUGGUCAUUGUUG	:.::: ::.::::.::::.:.	CGACA-UGGCCAAGAUCCGAG	Cleavage	locus=Chr11:2157606:2162912:+	1
bra-miR9565-5p	DACA000927	4	-1	1	21	356	376	UCUCGUUCUCUCGUUUCAGCU	::::.: ::::::.::::	UACUGAGAGAAGAGAAUGAGA	Cleavage	locus=Chr10:17698392:17699669:-	1
cca-miR6118-5p	DACA020351	4	-1	1	22	829	850	UGGAAUUGGGUGCUUCGGAAGA	::.: ::::: :::::::	GGGUCUGUUGCACCAAAUUCCA	Cleavage	locus=Chr10:543702:547889:+	1
cme-miR156g	DACA015342	4	-1	1	20	2493	2512	UGACAGAAGAGAGGGAGCAC	: ::.::::::.:::::	UCUCGCCUUCUCUUUUGUCA	Cleavage	locus=Chr07:24317952:24325668:-	1
cme-miR156h	DACA015342	4	-1	1	20	2493	2512	UGACAGAAGAGAGGGAGCAC	: ::.::::::.:::::	UCUCGCCUUCUCUUUUGUCA	Cleavage	locus=Chr07:24317952:24325668:-	1
cme-miR169a	DACA002429	4	-1	1	21	1247	1267	UAGCCAAAAAUGACUUGCCUG	::: .:::::: ::::::	AUGGCUGGUCAUUGUUGGCUU	Cleavage	locus=Chr11:16707398:16716252:-	1
cme-miR169b	DACA002429	4	-1	1	21	1247	1267	UAGCCAAAAAUGACUUGCCUG	::: .:::::: ::::::	AUGGCUGGUCAUUGUUGGCUU	Cleavage	locus=Chr11:16707398:16716252:-	1
cme-miR169i	DACA002429	4	-1	1	22	1246	1267	UAGCCAAAAAUGACUUGCCUGC	::: .:::::: ::::::	GAUGGCUGGUCAUUGUUGGCUU	Cleavage	locus=Chr11:16707398:16716252:-	1
cme-miR169j	DACA002429	4	-1	1	22	1246	1267	UAGCCAAAAAUGACUUGCCUGC	::: .:::::: ::::::	GAUGGCUGGUCAUUGUUGGCUU	Cleavage	locus=Chr11:16707398:16716252:-	1
cme-miR169l	DACA002429	4	-1	1	22	1246	1267	UAGCCAAAAAUGACUUGCCUGC	::: .:::::: ::::::	GAUGGCUGGUCAUUGUUGGCUU	Cleavage	locus=Chr11:16707398:16716252:-	1
cme-miR169m	DACA002429	4	-1	1	22	1246	1267	UAGCCAAAAAUGACUUGCCUGC	::: .:::::: ::::::	GAUGGCUGGUCAUUGUUGGCUU	Cleavage	locus=Chr11:16707398:16716252:-	1
cme-miR169t	DACA002429	4	-1	1	23	1246	1268	UGAGCCAAGAAUGACUUGCCGGC	: .::: .:::::: ::::::..	GAUGGCUGGUCAUUGUUGGCUUG	Cleavage	locus=Chr11:16707398:16716252:-	1
cme-miR395a	DACA005525	4	-1	1	21	1519	1539	CUGAAGUGUUUGGGGGAACUC	:::::. :.:::.::.::::	GAGUUUGCUCAAGCAUUUCAU	Cleavage	locus=Chr12:8111140:8126508:-	1
cme-miR395b	DACA005525	4	-1	1	21	1519	1539	UUGAAGUGUUUGGGGGAACUC	:::::. :.:::.::.::::	GAGUUUGCUCAAGCAUUUCAU	Cleavage	locus=Chr12:8111140:8126508:-	1
cme-miR395c	DACA005525	4	-1	1	21	1519	1539	UUGAAGUGUUUGGGGGAACUC	:::::. :.:::.::.::::	GAGUUUGCUCAAGCAUUUCAU	Cleavage	locus=Chr12:8111140:8126508:-	1
cme-miR395d	DACA005525	4	-1	1	21	1519	1539	CUGAAGUGUUUGGGGGAACUC	:::::. :.:::.::.::::	GAGUUUGCUCAAGCAUUUCAU	Cleavage	locus=Chr12:8111140:8126508:-	1
cme-miR395e	DACA005525	4	-1	1	21	1519	1539	CUGAAGUGUUUGGGGGAACUC	:::::. :.:::.::.::::	GAGUUUGCUCAAGCAUUUCAU	Cleavage	locus=Chr12:8111140:8126508:-	1
cme-miR395f	DACA005525	4	-1	1	21	1519	1539	CUGAAGUGUUUGGGGGAACUC	:::::. :.:::.::.::::	GAGUUUGCUCAAGCAUUUCAU	Cleavage	locus=Chr12:8111140:8126508:-	1
cme-miR399g	DACA018089	4	-1	1	22	580	601	AGGGCUUCUCUCCAUUGGCAGG	: ::: :::::::: :.:::	GCCGCCCUUGGAGAGAUGUCCU	Cleavage	locus=Chr11:2157606:2162912:+	1
cpa-miR169	DACA002429	4	-1	1	20	1248	1267	CAGCCAAGAAUGACUUGCCG	.::: .:::::: ::::::	UGGCUGGUCAUUGUUGGCUU	Cleavage	locus=Chr11:16707398:16716252:-	1
cpa-miR8136	DACA005525	4	-1	1	21	997	1017	UAAAGUGGAAUUGGGAUAAUA	:: ::: :::::...::::	AUUUCUCCAAAUUCUGUUUUA	Cleavage	locus=Chr12:8111140:8126508:-	1
cpa-miR8143	DACA015342	4	-1	1	24	2475	2498	GAGAGAUGGUGGACAGAUCAGGUA	: :::::.:::..:::: :	GGAUGGCUCUGUUCACUGUCUCGC	Cleavage	locus=Chr07:24317952:24325668:-	1
cpa-miR8143	DACA002429	4	-1	1	24	2469	2492	GAGAGAUGGUGGACAGAUCAGGUA	: :::::.:::..:::: :	GGAUAGCUCUGUUCACUGUCUCGC	Cleavage	locus=Chr11:16707398:16716252:-	1
cre-miR1169-3p	DACA018179	4	-1	1	21	1526	1546	UGUGGAUGUUGCUUGCUGGAU	: ..::::::::::::: :.	UUAUGGCAAGCAACAUCCCCG	Cleavage	locus=Chr01:14603431:14609298:+	1
csi-miR172c	DACA002429	4	-1	1	22	2185	2206	UGGAAUCUUGAUGAUGCUGCAG	:: ..::::::::::::: : :	CUAUGGCAUCAUCAAGAUGCAA	Cleavage	locus=Chr11:16707398:16716252:-	1
csi-miR395	DACA005525	4	-1	1	21	1519	1539	CUGAAGUGUUUGGGGGAACUC	:::::. :.:::.::.::::	GAGUUUGCUCAAGCAUUUCAU	Cleavage	locus=Chr12:8111140:8126508:-	1
ddi-miR-7095-5p	DACA000927	4	-1	1	21	457	477	UUCCAUUUUUAACAGAUACAA	:: : : :::.::.::::::	AUGGAGCAGUUGAAGAUGGAA	Cleavage	locus=Chr10:17698392:17699669:-	1
dpr-miR156a	DACA015342	4	-1	1	20	2493	2512	UGACAGAAGAGAGGGAGCAC	: ::.::::::.:::::	UCUCGCCUUCUCUUUUGUCA	Cleavage	locus=Chr07:24317952:24325668:-	1
dpr-miR397	DACA015668	4	-1	1	21	1200	1220	CCAUUGAGUGCAGCGUUGAUG	:.::.: :::::::::::	UUUUAAUGAGGCACUCAAUGG	Cleavage	locus=Chr08:11066706:11074546:-	1
esi-miR3463-5p	DACA005525	4	-1	1	21	2148	2168	UCAUUGCUGGUGCUCGUUGGA	::: :::: :::::.:::	CACAAGCAGCAACAGCAGUGA	Translation	locus=Chr12:8111140:8126508:-	1
esi-miR3466-5p	DACA002672	4	-1	1	21	841	861	UUCCGGAGGACUACCAUCACA	:::::::::::.: .:: :	GAUGAUGGUAGUCUUGUGGUA	Cleavage	locus=Chr07:12662273:12669644:-	1
esi-miR3466-5p	DACA015668	4	-1	1	21	841	861	UUCCGGAGGACUACCAUCACA	:::::::::::.: .:: :	GAUGAUGGUAGUCUUGUGGUA	Cleavage	locus=Chr08:11066706:11074546:-	1
esi-miR8625	DACA002672	4	-1	1	23	673	695	AACCAAGAUGGCCUGGAUUUGCG	: :::: .:::::::: :::::	CUCAAAGAUAGGCCAUCAUGGUU	Cleavage	locus=Chr07:12662273:12669644:-	1
far-miR156b	DACA015342	4	-1	1	21	2493	2513	UUGACAGAAGAGAGAGAGCAC	: : .::::::.::::::	UCUCGCCUUCUCUUUUGUCAA	Cleavage	locus=Chr07:24317952:24325668:-	1
ghr-miR399a	DACA017212	4	-1	1	21	781	801	CGCCAAUGGAGAUUUGUCCGG	.::: ::.::::.. :::::	AUGGAGAAGUCUCUGAUGGCG	Cleavage	locus=Chr02:15648176:15651151:+	1
ghr-miR399b	DACA017212	4	-1	1	21	781	801	CGCCAAUGGAGAUUUGUCCGG	.::: ::.::::.. :::::	AUGGAGAAGUCUCUGAUGGCG	Cleavage	locus=Chr02:15648176:15651151:+	1
ghr-miR482a	DACA015341	4	-1	1	22	128	149	UCUUUCCUACUCCUCCCAUACC	:.: :::::::.::.:.::	AUUGUCUGAGGAGUGGGGAGGA	Cleavage	locus=Chr07:24309785:24310846:-	1
ghr-miR7496a	DACA008865	4	-1	1	24	1516	1539	AUGACCAAAUUGAUAGAAUGUGUA	:.:::: : ::::::: ::::	CCGAUAUUCCAACAAUUUGUUCAU	Cleavage	locus=Chr10:9714453:9720437:+	1
ghr-miR7496b	DACA008865	4	-1	1	24	1516	1539	AUGACCAAAUUGAUAGAAUGUGUA	:.:::: : ::::::: ::::	CCGAUAUUCCAACAAUUUGUUCAU	Cleavage	locus=Chr10:9714453:9720437:+	1
gma-miR1513a-5p	DACA005525	4	-1	1	21	2076	2096	UGAGAGAAAGCCAUGACUUAC	::: ::::: : :::::::	AAAAGGCAUGGGUGUCUCUCA	Translation	locus=Chr12:8111140:8126508:-	1
gma-miR1513b	DACA005525	4	-1	1	21	2076	2096	UGAGAGAAAGCCAUGACUUAC	::: ::::: : :::::::	AAAAGGCAUGGGUGUCUCUCA	Translation	locus=Chr12:8111140:8126508:-	1
gma-miR1520m	DACA018179	4	-1	1	24	402	425	AAUCAGAACAUGACAUGUGACAAU	.::: :::: :::.::.::	GCCUCUACAAGUCAAGUUUUGGUU	Translation	locus=Chr01:14603431:14609298:+	1
gma-miR1535a	DACA005525	4	-1	1	19	3581	3599	CUUGUUUGUGGUGAUGUCU	::::: ..::.::.::::	AGACAAUGCCGCAGACAAC	Cleavage	locus=Chr12:8111140:8126508:-	1
gma-miR1535a	DACA022106	4	-1	1	19	127	145	CUUGUUUGUGGUGAUGUCU	.: :::::::: ::::::	GGUCAUCACCAAAAACAAC	Cleavage	locus=Chr06:11266475:11267521:-	1
gma-miR1535b	DACA022106	4	-1	1	21	125	145	CUUGUUUGUGGUGAUGUCUAG	:.: :::::::: ::::::	AUGGUCAUCACCAAAAACAAC	Cleavage	locus=Chr06:11266475:11267521:-	1
gma-miR1535b	DACA005525	4	-1	1	21	3579	3599	CUUGUUUGUGGUGAUGUCUAG	: ::::: ..::.::.::::	CCAGACAAUGCCGCAGACAAC	Cleavage	locus=Chr12:8111140:8126508:-	1
gma-miR156f	DACA015342	4	-1	1	22	2492	2513	UUGACAGAAGAGAGAGAGCACA	: : .::::::.::::::	GUCUCGCCUUCUCUUUUGUCAA	Cleavage	locus=Chr07:24317952:24325668:-	1
gma-miR169e	DACA002429	4	-1	1	20	1247	1266	AGCCAAGGAUGACUUGCCGG	.::: .:::::. ::::::	AUGGCUGGUCAUUGUUGGCU	Cleavage	locus=Chr11:16707398:16716252:-	1
gma-miR169j-5p	DACA002429	4	-1	1	21	1247	1267	UAGCCAAGAAUGACUUGCCGG	.::: .:::::: ::::::	AUGGCUGGUCAUUGUUGGCUU	Cleavage	locus=Chr11:16707398:16716252:-	1
gma-miR169k	DACA002429	4	-1	1	21	1247	1267	CAGCCAAGAAUGACUUGCCGG	.::: .:::::: ::::::	AUGGCUGGUCAUUGUUGGCUU	Cleavage	locus=Chr11:16707398:16716252:-	1
gma-miR169l-5p	DACA002429	4	-1	1	21	1247	1267	CAGCCAAGAAUGACUUGCCGG	.::: .:::::: ::::::	AUGGCUGGUCAUUGUUGGCUU	Cleavage	locus=Chr11:16707398:16716252:-	1
gma-miR394b-3p	DACA013924	4	-1	1	20	479	498	AGGUGGGCAUACUGUCAACU	::::: :::.::.::..:	CGUUGAGAGUGUGUCCGUCA	Cleavage	locus=Chr06:12486019:12486945:-	1
gma-miR395a	DACA005525	4	-1	1	21	1519	1539	CUGAAGUGUUUGGGGGAACUC	:::::. :.:::.::.::::	GAGUUUGCUCAAGCAUUUCAU	Cleavage	locus=Chr12:8111140:8126508:-	1
gma-miR395b	DACA005525	4	-1	1	21	1519	1539	CUGAAGUGUUUGGGGGAACUC	:::::. :.:::.::.::::	GAGUUUGCUCAAGCAUUUCAU	Cleavage	locus=Chr12:8111140:8126508:-	1
gma-miR395c	DACA005525	4	-1	1	21	1519	1539	CUGAAGUGUUUGGGGGAACUC	:::::. :.:::.::.::::	GAGUUUGCUCAAGCAUUUCAU	Cleavage	locus=Chr12:8111140:8126508:-	1
gma-miR397b-3p	DACA022171	4	-1	1	21	1427	1447	UAUUGACGCUGCACUCAAUCA	:. ::: ::.::::::.::.	GGGCUGACUGUAGCGUCGAUG	Cleavage	locus=Chr02:2486221:2491454:+	1
gma-miR482b-5p	DACA015342	4	-1	1	22	1921	1942	UAUGGGGGGAUUGGGAAGGAAU	::: :::.:::.:.:::..::.	AUUGCUUUCCAGUUCCCUUAUG	Cleavage	locus=Chr07:24317952:24325668:-	1
gma-miR482d-5p	DACA015342	4	-1	1	22	1921	1942	UAUGGGGGGAUUGGGAAGGAAU	::: :::.:::.:.:::..::.	AUUGCUUUCCAGUUCCCUUAUG	Cleavage	locus=Chr07:24317952:24325668:-	1
gma-miR482e	DACA015342	4	-1	1	21	1922	1942	UAUGGGGGGAUUGGGAAGGAA	:: :::.:::.:.:::..::.	UUGCUUUCCAGUUCCCUUAUG	Cleavage	locus=Chr07:24317952:24325668:-	1
gma-miR5372	DACA005525	4	-1	1	21	598	618	UUGUUCGAUAAAACUGUUGUG	::::::.: :::.:.:..:::	CACAACGGGUUUGUUGGGCAA	Cleavage	locus=Chr12:8111140:8126508:-	1
gma-miR5677	DACA000653	4	-1	1	21	217	237	UUUGGUCUUUAAUCAAGCUGA	.::: ::: .::::::::.	AGGGCUAGAUGGAAGACCAAG	Translation	locus=Chr07:16064301:16065225:-	1
gma-miR5775	DACA015668	4	-1	1	21	1572	1592	AUAAGCUCUUUUGAGAGCUUC	:.::.:::.:.::: :::::	GGAGUUCUUAGAAGUGCUUAA	Cleavage	locus=Chr08:11066706:11074546:-	1
gma-miR9752	DACA017378	4	-1	1	21	93	113	UGCUUCUUCUUUUCCCUGUUU	:::: ::..::::.:::: :	CAACAAGGGGAAGAGGAAGAA	Cleavage	locus=Chr36:1289000:1289710:+	1
gma-miR9752	DACA022106	4	-1	1	21	76	96	UGCUUCUUCUUUUCCCUGUUU	.: :::..:::::.::::	GGCUAUGGAGGAGAAGGAGCA	Cleavage	locus=Chr06:11266475:11267521:-	1
gma-miR9752	DACA018089	4	-1	1	21	369	389	UGCUUCUUCUUUUCCCUGUUU	.::: : :::.::::.:::	UGACAAGCAAAGGAAGGAGCU	Cleavage	locus=Chr11:2157606:2162912:+	1
gma-miR9755	DACA005525	4	-1	1	21	383	404	UGAUCC-AGGAACUUUUCAUCU	::::.:::::::: ::.:::	CAAUGAGAAGUUCCUUGGGUCA	Cleavage	locus=Chr12:8111140:8126508:-	1
gma-miR9764	DACA013924	4	-1	1	21	475	495	UGGAUACACUCUUACUUUCUC	: :: . :.:::::::.:::.	GCGACGUUGAGAGUGUGUCCG	Cleavage	locus=Chr06:12486019:12486945:-	1
gma-miR9765	DACA005525	4	-1	1	22	996	1017	UAAUACAGAAUUCGGAGACAAC	: ::::: :::::::: :::	CAUUUCUCCAAAUUCUGUUUUA	Cleavage	locus=Chr12:8111140:8126508:-	1
gra-miR482c	DACA015668	4	-1	1	22	1511	1532	UUCCCAAAACCUCCAAUUCCAA	: :::::::: : ::::::..	CUAGAAUUGGAAGCUUUGGGGG	Translation	locus=Chr08:11066706:11074546:-	1
gra-miR482c	DACA002672	4	-1	1	22	1436	1457	UUCCCAAAACCUCCAAUUCCAA	: :::::::: : ::::::..	CUAGAAUUGGAAGCUUUGGGGG	Translation	locus=Chr07:12662273:12669644:-	1
gra-miR7492d	DACA005431	4	-1	1	24	229	252	UGGGCUUAGAUUUUUUGCGGCGUU	.::: ::..:::::.:::.	CAGCUCGCCAAGGAUCUAGGCCUC	Cleavage	locus=Chr12:6847830:6850879:-	1
gra-miR7502b	DACA017499	4	-1	1	21	219	238	UUGUUAAAAGUUUCAUCCAUU	:::::::::..:::::: :::	AAUGGAUGAGGCUUUUA-CAA	Cleavage	locus=Chr09:10624920:10626582:-	1
gra-miR7502c	DACA017499	4	-1	1	21	219	238	UUGUUAAAAGUUUCAUCCAUU	:::::::::..:::::: :::	AAUGGAUGAGGCUUUUA-CAA	Cleavage	locus=Chr09:10624920:10626582:-	1
gra-miR8645	DACA010840	4	-1	1	22	357	378	UUGGUACCUGAACUUGACGUCU	: ::::::::: ::: ::::	GCAAGUCAAGUUCUGGUUCCAA	Cleavage	locus=Chr04:24213209:24217283:-	1
gra-miR8645	DACA025095	4	-1	1	22	378	399	UUGGUACCUGAACUUGACGUCU	: ::::::::: ::: ::::	GCAAGUCAAGUUCUGGUUCCAA	Cleavage	locus=Chr52:553692:557879:+	1
gra-miR8645	DACA020351	4	-1	1	22	414	435	UUGGUACCUGAACUUGACGUCU	: ::::::::: ::: ::::	GCAAGUCAAGUUCUGGUUCCAA	Cleavage	locus=Chr10:543702:547889:+	1
gra-miR8661	DACA015342	4	-1	1	21	1135	1155	CAUUACUUUUUCAUUCAUUAA	.:: :.::.:.::::..::	GAGAUCAGUGGAGAAGUGGUG	Cleavage	locus=Chr07:24317952:24325668:-	1
gra-miR8664	DACA008865	4	-1	1	23	1274	1296	UGGAGUCAACGGUGGGACGGAGA	.: ::.:::: :::..::::	AAGUCCUCUCACCAUUGGUUCCA	Translation	locus=Chr10:9714453:9720437:+	1
gra-miR8668	DACA018089	4	-1	1	20	421	440	UUUUGGAAUCAAGACUACAU	:::.:::.::::::::	GUCAAGUUUUGGUUCCAAAA	Cleavage	locus=Chr11:2157606:2162912:+	1
gra-miR8668	DACA018179	4	-1	1	20	412	431	UUUUGGAAUCAAGACUACAU	:::.:::.::::::::	GUCAAGUUUUGGUUCCAAAA	Cleavage	locus=Chr01:14603431:14609298:+	1
gra-miR8668	DACA020879	4	-1	1	20	559	578	UUUUGGAAUCAAGACUACAU	.:: :: .:::.::.::.::	GUGGAGGUUUGGUUUCAGAA	Cleavage	locus=Chr02:14605226:14606667:-	1
gra-miR8672	DACA002429	4	-1	1	24	1537	1560	AAGAGAAAUGAUUGUAUGAAACAG	::: :: :::::: :::::	GGAAGUCAAACUAUCAUUCCUCUU	Cleavage	locus=Chr11:16707398:16716252:-	1
gra-miR8684	DACA015668	4	-1	1	21	1594	1614	AGAAUGACUGGUUUACUCUUU	.::: : :.::::::::.:	UUGGAGAACAUCAGUCAUUUU	Cleavage	locus=Chr08:11066706:11074546:-	1
gra-miR8722	DACA018179	4	-1	1	22	1698	1719	CAUGUUUUUCCUGUUCAUCUUC	:::: ::::::.:.:::	GGUCAUGACCAGGAAGAGCAUA	Cleavage	locus=Chr01:14603431:14609298:+	2
gra-miR8722	DACA010840	4	-1	1	22	1638	1659	CAUGUUUUUCCUGUUCAUCUUC	:::: :::::..:.:.::	UGUCAUGACCAGGAGGAGCGUG	Cleavage	locus=Chr04:24213209:24217283:-	1
gra-miR8736	DACA013364	4	-1	1	24	724	747	GUGGAACGUGUUAAGAGAGGAAUA	::. ::::::.::::..:	GAGAGCUUCGUUAACAUGUUCUGC	Cleavage	locus=Chr11:7402726:7404164:-	1
gra-miR8757b	DACA017212	4	-1	1	23	917	939	UGGGUCGAGCUUAGGCAAGCAUA	::: .: :::::::.:::.	GGGCCUUCUCGAAGCUCGGCCCG	Cleavage	locus=Chr02:15648176:15651151:+	1
gra-miR8787	DACA017499	4	-1	1	23	53	75	UUUUCUUUUAAUUGGACGAGAUA	::: :: :: :.::::::::	GUACUCUUCAAAAUGAAAGAAAA	Translation	locus=Chr09:10624920:10626582:-	1
har-miR156c	DACA015342	4	-1	1	19	2494	2512	UGACAGAAGAGAGGGAGCA	: ::.::::::.:::::	CUCGCCUUCUCUUUUGUCA	Cleavage	locus=Chr07:24317952:24325668:-	1
hbr-miR6168	DACA017212	4	-1	1	21	128	148	UCUUGGUGCGGUGGACUGCUG	..: .: :::::::: :::::	UGGAGGCCCACCGCAACAAGA	Cleavage	locus=Chr02:15648176:15651151:+	1
hbr-miR6169	DACA020351	4	-1	1	21	195	215	UAGUAUUUCUCUUUUCUCUCU	: :::.:.:::.::::: :	GAAUAGAGAGGAGGAAUACGA	Cleavage	locus=Chr10:543702:547889:+	1
hbr-miR6169	DACA025095	4	-1	1	21	159	179	UAGUAUUUCUCUUUUCUCUCU	: :::.:.:::.::::: :	GAAUAGAGAGGAGGAAUACGA	Cleavage	locus=Chr52:553692:557879:+	1
hci-miR156b	DACA015342	4	-1	1	20	2493	2512	UGACAGAAGAGAGGGAGCAC	: ::.::::::.:::::	UCUCGCCUUCUCUUUUGUCA	Cleavage	locus=Chr07:24317952:24325668:-	1
hme-miR-277	DACA005525	4	-1	1	22	748	769	UAAAUGCACUAUCUGGUACGAC	: :: :::.::::::::.	ACUCUCCCUGAUGGUGCAUUUG	Cleavage	locus=Chr12:8111140:8126508:-	1
hme-miR-279c	DACA017499	4	-1	1	22	357	378	UGACUAGAUUUUCACUUAUCCU	: :: :::::.::.:::.::.	AAGACAAGUGGAAGUCUGGUUU	Cleavage	locus=Chr09:10624920:10626582:-	1
hme-miR-6307-3p	DACA000653	4	-1	1	22	106	127	CAAGCUCGAACUUUUCCUGCGU	.: :: :.:: ::::::::::	CUGGAGAAGAAUUUCGAGCUUG	Translation	locus=Chr07:16064301:16065225:-	1
hvu-miR168-5p	DACA010840	4	-1	1	21	490	510	UCGCUUGGUGCAGAUCGGGAC	::: ::::::::::: .:	AACCCAAUCUGCACCAACUGU	Cleavage	locus=Chr04:24213209:24217283:-	1
hvu-miR168-5p	DACA025095	4	-1	1	21	511	531	UCGCUUGGUGCAGAUCGGGAC	::: ::::::::::: .:	AACCCCAUCUGCACCAACUGC	Cleavage	locus=Chr52:553692:557879:+	1
hvu-miR168-5p	DACA020351	4	-1	1	21	547	567	UCGCUUGGUGCAGAUCGGGAC	::: ::::::::::: .:	AACCCCAUCUGCACCAACUGC	Cleavage	locus=Chr10:543702:547889:+	1
lja-miR7520	DACA002429	4	-1	1	21	2483	2502	GAGGGGGAAGGUGAUGACAUC	:::: ::.:::::.:..::	ACUGUC-UCGCCUUCUCUUUC	Cleavage	locus=Chr11:16707398:16716252:-	1
lja-miR7530	DACA006153	4	-1	1	22	58	79	CCUUCCUCUCUUCACUAUCUUC	:::.: ::.:::::::. :	GUCGAUGGAGAGGAGAGGAGCG	Cleavage	locus=Chr05:26188498:26189591:+	1
mdm-miR156t	DACA015342	4	-1	1	21	2493	2513	UUGACAGAAGAGAGAGAGCAC	: : .::::::.::::::	UCUCGCCUUCUCUUUUGUCAA	Cleavage	locus=Chr07:24317952:24325668:-	1
mdm-miR156u	DACA015342	4	-1	1	21	2493	2513	UUGACAGAAGAGAGAGAGCAC	: : .::::::.::::::	UCUCGCCUUCUCUUUUGUCAA	Cleavage	locus=Chr07:24317952:24325668:-	1
mdm-miR156v	DACA015342	4	-1	1	21	2493	2513	UUGACAGAAGAGAGAGAGCAC	: : .::::::.::::::	UCUCGCCUUCUCUUUUGUCAA	Cleavage	locus=Chr07:24317952:24325668:-	1
mdm-miR156w	DACA015342	4	-1	1	21	2493	2513	UUGACAGAAGAGAGAGAGCAC	: : .::::::.::::::	UCUCGCCUUCUCUUUUGUCAA	Cleavage	locus=Chr07:24317952:24325668:-	1
mdm-miR171o	DACA018179	4	-1	1	21	257	277	UGGGAUGUUGGUAUGGUUCAA	:: ::. ::::.:.:::::	AGGACCCGAACCAGCGUCCCA	Cleavage	locus=Chr01:14603431:14609298:+	1
mdm-miR395a	DACA005525	4	-1	1	21	1519	1539	CUGAAGUGUUUGGGGGAACUC	:::::. :.:::.::.::::	GAGUUUGCUCAAGCAUUUCAU	Cleavage	locus=Chr12:8111140:8126508:-	1
mdm-miR395b	DACA005525	4	-1	1	21	1519	1539	CUGAAGUGUUUGGGGGAACUC	:::::. :.:::.::.::::	GAGUUUGCUCAAGCAUUUCAU	Cleavage	locus=Chr12:8111140:8126508:-	1
mdm-miR395c	DACA005525	4	-1	1	21	1519	1539	CUGAAGUGUUUGGGGGAACUC	:::::. :.:::.::.::::	GAGUUUGCUCAAGCAUUUCAU	Cleavage	locus=Chr12:8111140:8126508:-	1
mdm-miR395d	DACA005525	4	-1	1	21	1519	1539	CUGAAGUGUUUGGGGGAACUC	:::::. :.:::.::.::::	GAGUUUGCUCAAGCAUUUCAU	Cleavage	locus=Chr12:8111140:8126508:-	1
mdm-miR395e	DACA005525	4	-1	1	21	1519	1539	CUGAAGUGUUUGGGGGAACUC	:::::. :.:::.::.::::	GAGUUUGCUCAAGCAUUUCAU	Cleavage	locus=Chr12:8111140:8126508:-	1
mdm-miR395f	DACA005525	4	-1	1	21	1519	1539	CUGAAGUGUUUGGGGGAACUC	:::::. :.:::.::.::::	GAGUUUGCUCAAGCAUUUCAU	Cleavage	locus=Chr12:8111140:8126508:-	1
mdm-miR395g	DACA005525	4	-1	1	21	1519	1539	CUGAAGUGUUUGGGGGAACUC	:::::. :.:::.::.::::	GAGUUUGCUCAAGCAUUUCAU	Cleavage	locus=Chr12:8111140:8126508:-	1
mdm-miR395h	DACA005525	4	-1	1	21	1519	1539	CUGAAGUGUUUGGGGGAACUC	:::::. :.:::.::.::::	GAGUUUGCUCAAGCAUUUCAU	Cleavage	locus=Chr12:8111140:8126508:-	1
mdm-miR395i	DACA005525	4	-1	1	21	1519	1539	CUGAAGUGUUUGGGGGAACUC	:::::. :.:::.::.::::	GAGUUUGCUCAAGCAUUUCAU	Cleavage	locus=Chr12:8111140:8126508:-	1
mdm-miR482a-5p	DACA008865	4	-1	1	22	857	878	AGGAAUGGGCUGUUUGGGAAGA	: : :::.::::::::: ::	CCAUGCCAGACAGCCCAUACCC	Cleavage	locus=Chr10:9714453:9720437:+	1
mes-miR169l	DACA002429	4	-1	1	21	1247	1267	CAGCCAAGAAUGACUUGCCGG	.::: .:::::: ::::::	AUGGCUGGUCAUUGUUGGCUU	Cleavage	locus=Chr11:16707398:16716252:-	1
mes-miR169m	DACA002429	4	-1	1	21	1247	1267	CAGCCAAGAAUGACUUGCCGG	.::: .:::::: ::::::	AUGGCUGGUCAUUGUUGGCUU	Cleavage	locus=Chr11:16707398:16716252:-	1
mes-miR395a	DACA005525	4	-1	1	21	1519	1539	CUGAAGUGUUUGGGGGAACUC	:::::. :.:::.::.::::	GAGUUUGCUCAAGCAUUUCAU	Cleavage	locus=Chr12:8111140:8126508:-	1
mes-miR395b	DACA005525	4	-1	1	21	1519	1539	CUGAAGUGUUUGGGGGAACUC	:::::. :.:::.::.::::	GAGUUUGCUCAAGCAUUUCAU	Cleavage	locus=Chr12:8111140:8126508:-	1
mes-miR395c	DACA005525	4	-1	1	21	1519	1539	CUGAAGUGUUUGGGGGAACUC	:::::. :.:::.::.::::	GAGUUUGCUCAAGCAUUUCAU	Cleavage	locus=Chr12:8111140:8126508:-	1
mes-miR395d	DACA005525	4	-1	1	21	1519	1539	CUGAAGUGUUUGGGGGAACUC	:::::. :.:::.::.::::	GAGUUUGCUCAAGCAUUUCAU	Cleavage	locus=Chr12:8111140:8126508:-	1
mtr-miR1510a-5p	DACA002672	4	-1	1	21	27	47	UUGUCUUACCCAUUCCUCCCA	:::: :..::::: .:::::	AGGGAAGGGUGGGUUGGACAA	Cleavage	locus=Chr07:12662273:12669644:-	1
mtr-miR169e-5p	DACA002429	4	-1	1	21	1247	1267	GAGCCAAGGAUGACUUGCCGG	.::: .:::::. ::::::.	AUGGCUGGUCAUUGUUGGCUU	Cleavage	locus=Chr11:16707398:16716252:-	1
mtr-miR169l-3p	DACA018089	4	-1	1	22	864	885	GGCAAGUUUUUCCUUGGCUAUA	:::: ::::.:.::::..	AGCUGCCAUGGAAGAGCUUGUU	Cleavage	locus=Chr11:2157606:2162912:+	1
mtr-miR169l-3p	DACA018179	4	-1	1	22	864	885	GGCAAGUUUUUCCUUGGCUAUA	.:::: ::::.:.::::.	GGCGGCCAUGGAAGAGCUUGUG	Cleavage	locus=Chr01:14603431:14609298:+	1
mtr-miR2586b	DACA025095	4	-1	1	22	969	990	CGGUGUCGUAUCGGUGUUGGAC	:::: :::::::..::.:.:	CUCCACCACCGAUGUGAUAUCA	Cleavage	locus=Chr52:553692:557879:+	1
mtr-miR2586b	DACA020351	4	-1	1	22	1164	1185	CGGUGUCGUAUCGGUGUUGGAC	:::: :::::::..::.:.:	CUCCACCACCGAUGUGAUAUCA	Cleavage	locus=Chr10:543702:547889:+	1
mtr-miR2592bm-5p	DACA010840	4	-1	1	22	142	163	CUCGGCAUUCAUGUUUUUCCUU	.:::::.:..::::: :::::	GAGGAAGAGUAUGAAAGCCGAU	Cleavage	locus=Chr04:24213209:24217283:-	1
mtr-miR2592bn-5p	DACA010840	4	-1	1	22	142	163	CUCGGCAUUCAUGUUUUUCCUU	.:::::.:..::::: :::::	GAGGAAGAGUAUGAAAGCCGAU	Cleavage	locus=Chr04:24213209:24217283:-	1
mtr-miR2596	DACA002672	4	-1	1	21	1170	1190	UCUAUUUCAUUGUUCCACACA	:: : ::..:::..:::::	GAUGGGAAAUGAUGGGAUAGA	Cleavage	locus=Chr07:12662273:12669644:-	1
mtr-miR2627	DACA010840	4	-1	1	22	1250	1271	UUUCGGUAGUUAACUGCUGAGG	:::: :: ::::.:::.:.	UGGCAGCCGUGAACUGCCGGAG	Cleavage	locus=Chr04:24213209:24217283:-	1
mtr-miR2630a	DACA010840	4	-1	1	21	1818	1838	UGGUUUUGGUCCUUGGUAUUU	.::::::.::::.:.::	CAUCGCCAAGGGCCAAGAUCA	Cleavage	locus=Chr04:24213209:24217283:-	1
mtr-miR2630b	DACA010840	4	-1	1	21	1818	1838	UGGUUUUGGUCCUUGGUAUUU	.::::::.::::.:.::	CAUCGCCAAGGGCCAAGAUCA	Cleavage	locus=Chr04:24213209:24217283:-	1
mtr-miR2630c	DACA010840	4	-1	1	21	1818	1838	UGGUUUUGGUCCUUGGUAUUU	.::::::.::::.:.::	CAUCGCCAAGGGCCAAGAUCA	Cleavage	locus=Chr04:24213209:24217283:-	1
mtr-miR2630d	DACA010840	4	-1	1	21	1818	1838	UGGUUUUGGUCCUUGGUAUUU	.::::::.::::.:.::	CAUCGCCAAGGGCCAAGAUCA	Cleavage	locus=Chr04:24213209:24217283:-	1
mtr-miR2630e	DACA010840	4	-1	1	21	1818	1838	UGGUUUUGGUCCUUGGUAUUU	.::::::.::::.:.::	CAUCGCCAAGGGCCAAGAUCA	Cleavage	locus=Chr04:24213209:24217283:-	1
mtr-miR2630f	DACA010840	4	-1	1	21	1818	1838	UGGUUUUGGUCCUUGGUAUUU	.::::::.::::.:.::	CAUCGCCAAGGGCCAAGAUCA	Cleavage	locus=Chr04:24213209:24217283:-	1
mtr-miR2630g	DACA010840	4	-1	1	21	1818	1838	UGGUUUUGGUCCUUGGUAUUU	.::::::.::::.:.::	CAUCGCCAAGGGCCAAGAUCA	Cleavage	locus=Chr04:24213209:24217283:-	1
mtr-miR2630h	DACA010840	4	-1	1	21	1818	1838	UGGUUUUGGUCCUUGGUAUUU	.::::::.::::.:.::	CAUCGCCAAGGGCCAAGAUCA	Cleavage	locus=Chr04:24213209:24217283:-	1
mtr-miR2630i	DACA010840	4	-1	1	21	1818	1838	UGGUUUUGGUCCUUGGUAUUU	.::::::.::::.:.::	CAUCGCCAAGGGCCAAGAUCA	Cleavage	locus=Chr04:24213209:24217283:-	1
mtr-miR2630j	DACA010840	4	-1	1	21	1818	1838	UGGUUUUGGUCCUUGGUAUUU	.::::::.::::.:.::	CAUCGCCAAGGGCCAAGAUCA	Cleavage	locus=Chr04:24213209:24217283:-	1
mtr-miR2630k	DACA010840	4	-1	1	21	1818	1838	UGGUUUUGGUCCUUGGUAUUU	.::::::.::::.:.::	CAUCGCCAAGGGCCAAGAUCA	Cleavage	locus=Chr04:24213209:24217283:-	1
mtr-miR2630l	DACA010840	4	-1	1	21	1818	1838	UGGUUUUGGUCCUUGGUAUUU	.::::::.::::.:.::	CAUCGCCAAGGGCCAAGAUCA	Cleavage	locus=Chr04:24213209:24217283:-	1
mtr-miR2630m	DACA010840	4	-1	1	21	1818	1838	UGGUUUUGGUCCUUGGUAUUU	.::::::.::::.:.::	CAUCGCCAAGGGCCAAGAUCA	Cleavage	locus=Chr04:24213209:24217283:-	1
mtr-miR2630n	DACA010840	4	-1	1	21	1818	1838	UGGUUUUGGUCCUUGGUAUUU	.::::::.::::.:.::	CAUCGCCAAGGGCCAAGAUCA	Cleavage	locus=Chr04:24213209:24217283:-	1
mtr-miR2630o	DACA010840	4	-1	1	21	1818	1838	UGGUUUUGGUCCUUGGUAUUU	.::::::.::::.:.::	CAUCGCCAAGGGCCAAGAUCA	Cleavage	locus=Chr04:24213209:24217283:-	1
mtr-miR2630p	DACA010840	4	-1	1	21	1818	1838	UGGUUUUGGUCCUUGGUAUUU	.::::::.::::.:.::	CAUCGCCAAGGGCCAAGAUCA	Cleavage	locus=Chr04:24213209:24217283:-	1
mtr-miR2630q	DACA010840	4	-1	1	21	1818	1838	UGGUUUUGGUCCUUGGUAUUU	.::::::.::::.:.::	CAUCGCCAAGGGCCAAGAUCA	Cleavage	locus=Chr04:24213209:24217283:-	1
mtr-miR2630r	DACA010840	4	-1	1	21	1818	1838	UGGUUUUGGUCCUUGGUAUUU	.::::::.::::.:.::	CAUCGCCAAGGGCCAAGAUCA	Cleavage	locus=Chr04:24213209:24217283:-	1
mtr-miR2630s	DACA010840	4	-1	1	21	1818	1838	UGGUUUUGGUCCUUGGUAUUU	.::::::.::::.:.::	CAUCGCCAAGGGCCAAGAUCA	Cleavage	locus=Chr04:24213209:24217283:-	1
mtr-miR2630t	DACA010840	4	-1	1	21	1818	1838	UGGUUUUGGUCCUUGGUAUUU	.::::::.::::.:.::	CAUCGCCAAGGGCCAAGAUCA	Cleavage	locus=Chr04:24213209:24217283:-	1
mtr-miR2630u	DACA010840	4	-1	1	21	1818	1838	UGGUUUUGGUCCUUGGUAUUU	.::::::.::::.:.::	CAUCGCCAAGGGCCAAGAUCA	Cleavage	locus=Chr04:24213209:24217283:-	1
mtr-miR2630v	DACA010840	4	-1	1	21	1818	1838	UGGUUUUGGUCCUUGGUAUUU	.::::::.::::.:.::	CAUCGCCAAGGGCCAAGAUCA	Cleavage	locus=Chr04:24213209:24217283:-	1
mtr-miR2630w	DACA010840	4	-1	1	21	1818	1838	UGGUUUUGGUCCUUGGUAUUU	.::::::.::::.:.::	CAUCGCCAAGGGCCAAGAUCA	Cleavage	locus=Chr04:24213209:24217283:-	1
mtr-miR2630x	DACA010840	4	-1	1	21	1818	1838	UGGUUUUGGUCCUUGGUAUUU	.::::::.::::.:.::	CAUCGCCAAGGGCCAAGAUCA	Cleavage	locus=Chr04:24213209:24217283:-	1
mtr-miR2630y	DACA010840	4	-1	1	21	1818	1838	UGGUUUUGGUCCUUGGUAUUU	.::::::.::::.:.::	CAUCGCCAAGGGCCAAGAUCA	Cleavage	locus=Chr04:24213209:24217283:-	1
mtr-miR2657	DACA018089	4	-1	1	22	1548	1569	UGUUAUUUCAUCGAUUUUGUUG	:..:.: ::::.:: .::::::	CGGCGAUAUCGGUGUGAUAACA	Cleavage	locus=Chr11:2157606:2162912:+	1
mtr-miR2673a	DACA017378	4	-1	1	22	99	120	CCUCUUCCUCUUCCUCUUCCAC	: :::::::::::: :::::	GGGGAAGAGGAAGAACAAGAGA	Cleavage	locus=Chr36:1289000:1289710:+	1
mtr-miR2673a	DACA006215	4	-1	1	22	138	159	CCUCUUCCUCUUCCUCUUCCAC	:: ::::::.:::::.:	GAGAAAAAGGAAGGGGAAGGGA	Cleavage	locus=Chr06:7083522:7085003:-	2
mtr-miR2673a	DACA018421	4	-1	1	22	448	469	CCUCUUCCUCUUCCUCUUCCAC	:::::::: :.::..:::	GAAGAAGAGGACGGGGGGGAGC	Translation	locus=Chr10:7311092:7311953:+	1
mtr-miR2673b	DACA017378	4	-1	1	22	99	120	CCUCUUCCUCUUCCUCUUCCAC	: :::::::::::: :::::	GGGGAAGAGGAAGAACAAGAGA	Cleavage	locus=Chr36:1289000:1289710:+	1
mtr-miR2673b	DACA006215	4	-1	1	22	138	159	CCUCUUCCUCUUCCUCUUCCAC	:: ::::::.:::::.:	GAGAAAAAGGAAGGGGAAGGGA	Cleavage	locus=Chr06:7083522:7085003:-	2
mtr-miR2673b	DACA018421	4	-1	1	22	448	469	CCUCUUCCUCUUCCUCUUCCAC	:::::::: :.::..:::	GAAGAAGAGGACGGGGGGGAGC	Translation	locus=Chr10:7311092:7311953:+	1
mtr-miR395g	DACA005525	4	-1	1	21	1519	1539	UUGAAGUGUUUGGGGGAACUC	:::::. :.:::.::.::::	GAGUUUGCUCAAGCAUUUCAU	Cleavage	locus=Chr12:8111140:8126508:-	1
mtr-miR4414b	DACA002672	4	-1	1	21	1679	1699	UGUGAAUGAUGCGGGAGCUAA	:.:.:.::::::::::: :	CUGGUUUCCGCAUCAUUCCCC	Cleavage	locus=Chr07:12662273:12669644:-	1
mtr-miR5210	DACA005525	4	-1	1	22	3535	3556	UAAAUGUGUUGGAAUUAAGGUU	:: ..:::.::.::::::	UCGCUGGGUUCUAAUACAUUUU	Cleavage	locus=Chr12:8111140:8126508:-	1
mtr-miR5231	DACA005525	4	-1	1	21	2791	2811	UUAUGCAAGUAGAUAAGCUCA	:::: : :::::::::: :	GAAGCUCAACUACUUGCAUCA	Cleavage	locus=Chr12:8111140:8126508:-	1
mtr-miR5556-5p	DACA022464	4	-1	1	21	655	675	UGGAAUUCUUCCGCCAUCCAA	: :.:::.::::::.::: :	CUUGGUGGUGGAAGAGUUCGA	Cleavage	locus=Chr03:28715628:28717834:+	1
nta-miR395a	DACA005525	4	-1	1	21	1519	1539	CUGAAGUGUUUGGGGGAACUC	:::::. :.:::.::.::::	GAGUUUGCUCAAGCAUUUCAU	Cleavage	locus=Chr12:8111140:8126508:-	1
nta-miR395b	DACA005525	4	-1	1	21	1519	1539	CUGAAGUGUUUGGGGGAACUC	:::::. :.:::.::.::::	GAGUUUGCUCAAGCAUUUCAU	Cleavage	locus=Chr12:8111140:8126508:-	1
nta-miR395c	DACA005525	4	-1	1	21	1519	1539	CUGAAGUGUUUGGGGGAACUC	:::::. :.:::.::.::::	GAGUUUGCUCAAGCAUUUCAU	Cleavage	locus=Chr12:8111140:8126508:-	1
nta-miR6020a-5p	DACA013364	4	-1	1	21	240	260	AAAUGUUUUUCGAGUAUCUUC	::.::: :::::.::. ::::	GAGGAUUCUCGAGAAGAAUUU	Cleavage	locus=Chr11:7402726:7404164:-	1
osa-miR166k-5p	DACA013303	4	-1	1	21	201	221	GGUUUGUUGUCUGGCUCGAGG	..::::: .::: :::::.:.	UUUCGAGGUAGAAAACAAGCU	Cleavage	locus=Chr04:5728597:5730529:-	1
osa-miR168a-5p	DACA025095	4	-1	1	21	511	531	UCGCUUGGUGCAGAUCGGGAC	::: ::::::::::: .:	AACCCCAUCUGCACCAACUGC	Cleavage	locus=Chr52:553692:557879:+	1
osa-miR168a-5p	DACA010840	4	-1	1	21	490	510	UCGCUUGGUGCAGAUCGGGAC	::: ::::::::::: .:	AACCCAAUCUGCACCAACUGU	Cleavage	locus=Chr04:24213209:24217283:-	1
osa-miR168a-5p	DACA020351	4	-1	1	21	547	567	UCGCUUGGUGCAGAUCGGGAC	::: ::::::::::: .:	AACCCCAUCUGCACCAACUGC	Cleavage	locus=Chr10:543702:547889:+	1
osa-miR169n	DACA002429	4	-1	1	21	1247	1267	UAGCCAAGAAUGACUUGCCUA	::: .:::::: ::::::	AUGGCUGGUCAUUGUUGGCUU	Cleavage	locus=Chr11:16707398:16716252:-	1
osa-miR169o	DACA002429	4	-1	1	21	1247	1267	UAGCCAAGAAUGACUUGCCUA	::: .:::::: ::::::	AUGGCUGGUCAUUGUUGGCUU	Cleavage	locus=Chr11:16707398:16716252:-	1
osa-miR1865-5p	DACA000653	4	-1	1	24	549	572	UGCUAGUGAUGGUGAUUCUUCGAC	: :: : ::::.:::::: ::::	GGCGCAUCAUCAUCAUCACCAGCA	Cleavage	locus=Chr07:16064301:16065225:-	1
osa-miR1879	DACA013924	4	-1	1	24	225	247	GUGUUUGGUUUAGGGAUGAGGUGG	.:::: :.:::::::::: ::	CACUCUCA-CUCUAAACCAAAAAC	Cleavage	locus=Chr06:12486019:12486945:-	1
osa-miR2055	DACA023137	4	-1	1	21	446	466	UUUCCUUGGGAAGGUGGUUUC	.:...::: :.::::::::	AUGAUUGCCUCCUCAAGGAAA	Translation	locus=Chr08:784609:787172:-	1
osa-miR2092-5p	DACA018421	4	-1	1	21	79	99	CAACUGAAGUCGGUGUUUACU	: :.::.::.:::: ::::	CAUCAGCAUCGGCUUCCGUUG	Cleavage	locus=Chr10:7311092:7311953:+	1
osa-miR2118a	DACA018179	4	-1	1	22	1006	1027	UUCUCGAUGCCUCCCAUUCCUA	::: :::::: ::::::.	CUCAAAUCGGAGGCCUCGAGAG	Cleavage	locus=Chr01:14603431:14609298:+	1
osa-miR2118f	DACA015960	4	-1	1	22	645	666	UUCCUGAUGCCUCCCAUUCCUA	:. :::: :::::: :::: ::	UGAGAAUCGGAGGCUUCAGAAA	Cleavage	locus=Chr03:18533366:18534449:+	1
osa-miR2118j	DACA015960	4	-1	1	22	645	666	UUCCUGAUGCCUCCCAUUCCUA	:. :::: :::::: :::: ::	UGAGAAUCGGAGGCUUCAGAAA	Cleavage	locus=Chr03:18533366:18534449:+	1
osa-miR2118l	DACA015668	4	-1	1	22	1511	1532	UUCCUAAUGCUUCCCAUUCCUA	:::: :::::: ::.::..	CUAGAAUUGGAAGCUUUGGGGG	Cleavage	locus=Chr08:11066706:11074546:-	1
osa-miR2118l	DACA002672	4	-1	1	22	1436	1457	UUCCUAAUGCUUCCCAUUCCUA	:::: :::::: ::.::..	CUAGAAUUGGAAGCUUUGGGGG	Cleavage	locus=Chr07:12662273:12669644:-	1
osa-miR2118m	DACA015960	4	-1	1	22	645	666	UUCCUGAUGCCUCCCAUUCCUA	:. :::: :::::: :::: ::	UGAGAAUCGGAGGCUUCAGAAA	Cleavage	locus=Chr03:18533366:18534449:+	1
osa-miR2876-3p	DACA005525	4	-1	1	21	417	436	UUCCUAUAUGAACACUGUUGC	:::: ::::::.::::.:	GACACAG-GUUCAUGUAGGGA	Cleavage	locus=Chr12:8111140:8126508:-	1
osa-miR395o	DACA005525	4	-1	1	21	1519	1539	AUGAAGUGUUUGGAGGAACUC	:::::. .:::.::.:::::	GAGUUUGCUCAAGCAUUUCAU	Cleavage	locus=Chr12:8111140:8126508:-	1
osa-miR413	DACA025095	4	-1	1	21	990	1010	CUAGUUUCACUUGUUCUGCAC	..:::...:::.::::::	AAAUGGAAUGGGUGGAACUAG	Cleavage	locus=Chr52:553692:557879:+	1
osa-miR413	DACA020351	4	-1	1	21	1185	1205	CUAGUUUCACUUGUUCUGCAC	..:::...:::.::::::	AAAUGGAAUGGGUGGAACUAG	Cleavage	locus=Chr10:543702:547889:+	1
osa-miR444b.2	DACA015342	4	-1	1	21	381	401	UGCAGUUGUUGUCUCAAGCUU	: :: :.::.::::::::	AUACAUGCGGCAGCAACUGCA	Cleavage	locus=Chr07:24317952:24325668:-	1
osa-miR444c.2	DACA015342	4	-1	1	21	381	401	UGCAGUUGUUGUCUCAAGCUU	: :: :.::.::::::::	AUACAUGCGGCAGCAACUGCA	Cleavage	locus=Chr07:24317952:24325668:-	1
osa-miR5075	DACA017499	4	-1	1	21	184	204	UUCUCCGUCGCCGCCGUCCGC	:::::::::::::::	UUUAGGGGCGGCGACGGAGAA	Cleavage	locus=Chr09:10624920:10626582:-	1
osa-miR5075	DACA013923	4	-1	1	21	408	428	UUCUCCGUCGCCGCCGUCCGC	:.::::::::.:: :::.	GGCGGCGGCGGCGGCGCAGAG	Cleavage	locus=Chr06:12489975:12490847:+	1
osa-miR5075	DACA018089	4	-1	1	21	1143	1163	UUCUCCGUCGCCGCCGUCCGC	::::: ::.:.:::.:::	CUCGACGGGGGUGGCGGGGAA	Cleavage	locus=Chr11:2157606:2162912:+	1
osa-miR531a	DACA023137	4	-1	1	24	320	343	CUCGCCGGGGCUGCGUGCCGCCAU	.::: . :::::::::: ::	ACCUUGGCCUCCAGCCCCGGCAAG	Cleavage	locus=Chr08:784609:787172:-	1
osa-miR531b	DACA023137	4	-1	1	20	324	343	CUCGCCGGGGCUGCGUGCCG	.::: . :::::::::: ::	UGGCCUCCAGCCCCGGCAAG	Cleavage	locus=Chr08:784609:787172:-	1
osa-miR531c	DACA023137	4	-1	1	24	320	343	CUCGCCGGGGCUGCGUGCCGCCAU	.::: . :::::::::: ::	ACCUUGGCCUCCAGCCCCGGCAAG	Cleavage	locus=Chr08:784609:787172:-	1
osa-miR535-3p	DACA018421	4	-1	1	21	451	471	GUGCUUUCUCCCGUUGUCACU	:: .:::::.:..:::::	GAAGAGGACGGGGGGGAGCAC	Cleavage	locus=Chr10:7311092:7311953:+	1
osa-miR5488	DACA015668	4	-1	1	21	1596	1616	UGAAGGCGACUGAUGAUUUCA	::.: :::::::: ..::::	GGAGAACAUCAGUCAUUUUCA	Cleavage	locus=Chr08:11066706:11074546:-	1
osa-miR5494	DACA022106	4	-1	1	21	690	710	UUAUAGGAGGUAUAGACGGUA	: :.::::.: :.::::.:.:	UUCUGUCUGUCCUUCCUGUGA	Translation	locus=Chr06:11266475:11267521:-	1
osa-miR5499	DACA020351	4	-1	1	21	2112	2132	GAAGGAAGAAUCGUUAUGGAA	: :.:..:: ::::::::::	CUACGUGGCGCUUCUUCCUUC	Translation	locus=Chr10:543702:547889:+	1
osa-miR5499	DACA025095	4	-1	1	21	1905	1925	GAAGGAAGAAUCGUUAUGGAA	: :.:..:: ::::::::::	CUACGUGGCGCUUCUUCCUUC	Translation	locus=Chr52:553692:557879:+	1
osa-miR5506	DACA021755	4	-1	1	21	747	767	UGGAUCGCUUCGUCUGAUGGU	:::..:: ::.:::.:::.	CGCAUUGGAAGAGGCGGUCCG	Cleavage	locus=Chr09:9598434:9601733:-	1
osa-miR5829	DACA015342	4	-1	1	24	880	903	AUCAGGACCAGUAGGCGAUGGUAA	::: :.:: ::::.:::.:	GAGAGAUCACUUAGUGGUUCUGGU	Translation	locus=Chr07:24317952:24325668:-	1
osa-miR5834	DACA020351	4	-1	1	21	837	857	ACGGAUGUAGAAAUUGGUGAU	:::::: ::: ::.::.::	UGCACCAAAUUCCACGUCUGU	Cleavage	locus=Chr10:543702:547889:+	1
osa-miR7693-5p	DACA006789	4	-1	1	24	101	124	GUUUCCGCUCUUCAUCGAUGGCUG	:::::: ::::.:. :::.:	UGAACAUCGAAGAAGGGUCGAAGC	Cleavage	locus=Chr06:17336365:17338974:+	1
osa-miR815a	DACA018089	4	-1	1	21	1977	1997	AAGGGGAUUGAGGAGAUUGGG	: ::. :::::::. :.::::	CACAGACUCCUCAGGCUCCUU	Cleavage	locus=Chr11:2157606:2162912:+	1
osa-miR815b	DACA018089	4	-1	1	21	1977	1997	AAGGGGAUUGAGGAGAUUGGG	: ::. :::::::. :.::::	CACAGACUCCUCAGGCUCCUU	Cleavage	locus=Chr11:2157606:2162912:+	1
osa-miR815c	DACA018089	4	-1	1	21	1977	1997	AAGGGGAUUGAGGAGAUUGGG	: ::. :::::::. :.::::	CACAGACUCCUCAGGCUCCUU	Cleavage	locus=Chr11:2157606:2162912:+	1
pde-miR159	DACA018089	4	-1	1	21	86	106	UUUGGUUUGAAGGGAGCUCUA	:.::::.:::.::..::.	CCGGGCUCUCUUUAAGUCAGC	Cleavage	locus=Chr11:2157606:2162912:+	1
ppt-miR1078	DACA006946	4	-1	1	21	228	248	UUUGGAUGAUUCAAUUGUGAU	::::: :::::::::::	UGAACAAUGCAAUCAUCCAAA	Cleavage	locus=Chr06:19306094:19307032:-	1
ppt-miR893	DACA022464	4	-1	1	20	598	617	AUUGGGACUUGUGCUGGGAC	::::: ::::.: :::::	UUCCCAUCACAGGCCCCAAC	Cleavage	locus=Chr03:28715628:28717834:+	1
ppt-miR902h-5p	DACA002429	4	-1	1	20	2176	2195	UUAUGAUGUAGAUUCUUCAU	:::::::::::.. ::: :	UUGAAGAAUCUAUGGCAUCA	Cleavage	locus=Chr11:16707398:16716252:-	1
ppt-miR902i-5p	DACA002429	4	-1	1	20	2176	2195	UUAUGAUGUAGAUUCUUCAU	:::::::::::.. ::: :	UUGAAGAAUCUAUGGCAUCA	Cleavage	locus=Chr11:16707398:16716252:-	1
pta-miR946a-5p	DACA001730	4	-1	1	21	540	560	UGUGGAUAGAGAAGGGUUAGU	:.::::::::::: ..::	UGAAGCCCUUCUCUAUGUGCA	Cleavage	locus=Chr03:13773813:13775310:+	1
ptc-miR1444b	DACA005525	4	-1	1	20	300	319	UUCACAUUCGGUCAACGUUC	::: ::::: ::::::.:	AAACUGUGACCAAAUGUGGA	Cleavage	locus=Chr12:8111140:8126508:-	1
ptc-miR1444c	DACA005525	4	-1	1	20	300	319	UUCACAUUCGGUCAACGUUC	::: ::::: ::::::.:	AAACUGUGACCAAAUGUGGA	Cleavage	locus=Chr12:8111140:8126508:-	1
ptc-miR156k	DACA015342	4	-1	1	20	2493	2512	UGACAGAAGAGAGGGAGCAC	: ::.::::::.:::::	UCUCGCCUUCUCUUUUGUCA	Cleavage	locus=Chr07:24317952:24325668:-	1
ptc-miR169aa	DACA002429	4	-1	1	21	1247	1267	GAGCCAAGAAUGACUUGUCGG	.:.: .:::::: ::::::.	AUGGCUGGUCAUUGUUGGCUU	Cleavage	locus=Chr11:16707398:16716252:-	1
ptc-miR169ag	DACA002429	4	-1	1	22	1246	1267	AAGCCAAGGGUGACUUGCCUGA	::: .::::.. :::::::	GAUGGCUGGUCAUUGUUGGCUU	Cleavage	locus=Chr11:16707398:16716252:-	1
ptc-miR169b-3p	DACA015960	4	-1	1	20	437	456	GGCAGGUUGUUCUUGGCUAC	: : :::::::..:::::	UCACCAAAGAACAGUCUGCC	Cleavage	locus=Chr03:18533366:18534449:+	1
ptc-miR169b-3p	DACA022106	4	-1	1	20	377	396	GGCAGGUUGUUCUUGGCUAC	: : ::::::::.::::.	UCACCAAAGAACAAUCUGCU	Cleavage	locus=Chr06:11266475:11267521:-	1
ptc-miR395b	DACA005525	4	-1	1	21	1519	1539	CUGAAGUGUUUGGGGGAACUC	:::::. :.:::.::.::::	GAGUUUGCUCAAGCAUUUCAU	Cleavage	locus=Chr12:8111140:8126508:-	1
ptc-miR395c	DACA005525	4	-1	1	21	1519	1539	CUGAAGUGUUUGGGGGAACUC	:::::. :.:::.::.::::	GAGUUUGCUCAAGCAUUUCAU	Cleavage	locus=Chr12:8111140:8126508:-	1
ptc-miR395d	DACA005525	4	-1	1	21	1519	1539	CUGAAGUGUUUGGGGGAACUC	:::::. :.:::.::.::::	GAGUUUGCUCAAGCAUUUCAU	Cleavage	locus=Chr12:8111140:8126508:-	1
ptc-miR395e	DACA005525	4	-1	1	21	1519	1539	CUGAAGUGUUUGGGGGAACUC	:::::. :.:::.::.::::	GAGUUUGCUCAAGCAUUUCAU	Cleavage	locus=Chr12:8111140:8126508:-	1
ptc-miR395f	DACA005525	4	-1	1	21	1519	1539	CUGAAGUGUUUGGGGGAACUC	:::::. :.:::.::.::::	GAGUUUGCUCAAGCAUUUCAU	Cleavage	locus=Chr12:8111140:8126508:-	1
ptc-miR395g	DACA005525	4	-1	1	21	1519	1539	CUGAAGUGUUUGGGGGAACUC	:::::. :.:::.::.::::	GAGUUUGCUCAAGCAUUUCAU	Cleavage	locus=Chr12:8111140:8126508:-	1
ptc-miR395h	DACA005525	4	-1	1	21	1519	1539	CUGAAGUGUUUGGGGGAACUC	:::::. :.:::.::.::::	GAGUUUGCUCAAGCAUUUCAU	Cleavage	locus=Chr12:8111140:8126508:-	1
ptc-miR395i	DACA005525	4	-1	1	21	1519	1539	CUGAAGUGUUUGGGGGAACUC	:::::. :.:::.::.::::	GAGUUUGCUCAAGCAUUUCAU	Cleavage	locus=Chr12:8111140:8126508:-	1
ptc-miR395j	DACA005525	4	-1	1	21	1519	1539	CUGAAGUGUUUGGGGGAACUC	:::::. :.:::.::.::::	GAGUUUGCUCAAGCAUUUCAU	Cleavage	locus=Chr12:8111140:8126508:-	1
ptc-miR395k	DACA005525	4	-1	1	21	1519	1539	CUGAAGUGUUUGGGGGAACUC	:::::. :.:::.::.::::	GAGUUUGCUCAAGCAUUUCAU	Cleavage	locus=Chr12:8111140:8126508:-	1
ptc-miR397b	DACA015668	4	-1	1	21	1200	1220	CCAUUGAGUGCAGCGUUGAUG	:.::.: :::::::::::	UUUUAAUGAGGCACUCAAUGG	Cleavage	locus=Chr08:11066706:11074546:-	1
ptc-miR398c-5p	DACA002672	4	-1	1	21	803	823	GGAGCGACCUGAAAUCACAUG	:::: ::: :::.:::::	CCCGUGACUUCUGGUUGCUCC	Translation	locus=Chr07:12662273:12669644:-	1
ptc-miR473a-5p	DACA002672	4	-1	1	20	1443	1462	ACUCUCCCUCAAGGCUUCCA	:::::::.:::.:::. ::	UGGAAGCUUUGGGGGGCAGG	Cleavage	locus=Chr07:12662273:12669644:-	1
ptc-miR473b	DACA015668	4	-1	1	20	1518	1537	GCUCUCCCUCAGGGCUUCCA	:::::::..::.:::: ::	UGGAAGCUUUGGGGGACAGG	Cleavage	locus=Chr08:11066706:11074546:-	1
ptc-miR477d-5p	DACA012489	4	-1	1	22	215	236	AUCUCCCUCAAAGGCUUCCUCU	.::: .:..::::::::.:::	GGAGCCGGUUUUUGAGGGGGAU	Cleavage	locus=Chr04:27666731:27668717:+	1
ptc-miR478a	DACA017499	4	-1	1	24	10	33	UGACGUGUCUUCUAUUUUUAGGGA	..:::. :::.:::::.:::.	GGUUUAAGCUUAGGAGACAUGUCG	Cleavage	locus=Chr09:10624920:10626582:-	1
ptc-miR478b	DACA017499	4	-1	1	24	10	33	UGACGUGUCUUCUAUUUUUAGGGA	..:::. :::.:::::.:::.	GGUUUAAGCUUAGGAGACAUGUCG	Cleavage	locus=Chr09:10624920:10626582:-	1
ptc-miR478c	DACA017499	4	-1	1	24	10	33	UGACGUGUCUUCUAUUUUUAGGGA	..:::. :::.:::::.:::.	GGUUUAAGCUUAGGAGACAUGUCG	Cleavage	locus=Chr09:10624920:10626582:-	1
ptc-miR478p	DACA015960	4	-1	1	24	6	29	UAACGUGUCUUCUAUUUUUAGGGA	: ::.:: ::::::::: ::	AAACAAAGAAGAGAAGACACUUUU	Cleavage	locus=Chr03:18533366:18534449:+	1
ptc-miR6438a	DACA005525	4	-1	1	22	1683	1704	UUGUACACAGAAUAGGUGAAAU	:::: ::::.:::::: ::	GCUUCAGGUAUUUUGUGUAAAA	Cleavage	locus=Chr12:8111140:8126508:-	1
ptc-miR6438b	DACA005525	4	-1	1	22	1683	1704	UUGUACACAGAAUAGGUGAAAU	:::: ::::.:::::: ::	GCUUCAGGUAUUUUGUGUAAAA	Cleavage	locus=Chr12:8111140:8126508:-	1
ptc-miR6477	DACA020351	4	-1	1	21	842	863	UGAACAGUAGACGU-GAAUUAU	::::: ::::::..:::::	CAAAUUCCACGUCUGUUGUUCC	Cleavage	locus=Chr10:543702:547889:+	1
ptc-miR7826	DACA000653	4	-1	1	21	111	131	UUACCAAGUUUCAAAUUCUCA	::::::: .:.::::: ::	GAAGAAUUUCGAGCUUGGGAA	Cleavage	locus=Chr07:16064301:16065225:-	1
rco-miR395a	DACA005525	4	-1	1	21	1519	1539	CUGAAGUGUUUGGGGGAACUC	:::::. :.:::.::.::::	GAGUUUGCUCAAGCAUUUCAU	Cleavage	locus=Chr12:8111140:8126508:-	1
rco-miR395b	DACA005525	4	-1	1	21	1519	1539	CUGAAGUGUUUGGGGGAACUC	:::::. :.:::.::.::::	GAGUUUGCUCAAGCAUUUCAU	Cleavage	locus=Chr12:8111140:8126508:-	1
rco-miR395c	DACA005525	4	-1	1	21	1519	1539	CUGAAGUGUUUGGGGGAACUC	:::::. :.:::.::.::::	GAGUUUGCUCAAGCAUUUCAU	Cleavage	locus=Chr12:8111140:8126508:-	1
rco-miR395d	DACA005525	4	-1	1	21	1519	1539	CUGAAGUGUUUGGGGGAACUC	:::::. :.:::.::.::::	GAGUUUGCUCAAGCAUUUCAU	Cleavage	locus=Chr12:8111140:8126508:-	1
rco-miR395e	DACA005525	4	-1	1	21	1519	1539	CUGAAGUGUUUGGGGGAACUC	:::::. :.:::.::.::::	GAGUUUGCUCAAGCAUUUCAU	Cleavage	locus=Chr12:8111140:8126508:-	1
sbi-miR168	DACA010840	4	-1	1	21	490	510	UCGCUUGGUGCAGAUCGGGAC	::: ::::::::::: .:	AACCCAAUCUGCACCAACUGU	Cleavage	locus=Chr04:24213209:24217283:-	1
sbi-miR168	DACA025095	4	-1	1	21	511	531	UCGCUUGGUGCAGAUCGGGAC	::: ::::::::::: .:	AACCCCAUCUGCACCAACUGC	Cleavage	locus=Chr52:553692:557879:+	1
sbi-miR168	DACA020351	4	-1	1	21	547	567	UCGCUUGGUGCAGAUCGGGAC	::: ::::::::::: .:	AACCCCAUCUGCACCAACUGC	Cleavage	locus=Chr10:543702:547889:+	1
sbi-miR169i	DACA002429	4	-1	1	21	1247	1267	UAGCCAAGAAUGACUUGCCUA	::: .:::::: ::::::	AUGGCUGGUCAUUGUUGGCUU	Cleavage	locus=Chr11:16707398:16716252:-	1
sly-miR394-3p	DACA013924	4	-1	1	20	479	498	AGGUGGGCAUACUGUCAACA	::::: :::.::.::..:	CGUUGAGAGUGUGUCCGUCA	Cleavage	locus=Chr06:12486019:12486945:-	1
sly-miR395a	DACA005525	4	-1	1	22	1518	1539	CUGAAGUGUUUGGGGGAACUCC	:::::. :.:::.::.::::	UGAGUUUGCUCAAGCAUUUCAU	Cleavage	locus=Chr12:8111140:8126508:-	1
sly-miR395b	DACA005525	4	-1	1	22	1518	1539	CUGAAGUGUUUGGGGGAACUCC	:::::. :.:::.::.::::	UGAGUUUGCUCAAGCAUUUCAU	Cleavage	locus=Chr12:8111140:8126508:-	1
sly-miR482e-3p	DACA015341	4	-1	1	22	128	149	UCUUUCCUACUCCUCCCAUACC	:.: :::::::.::.:.::	AUUGUCUGAGGAGUGGGGAGGA	Cleavage	locus=Chr07:24309785:24310846:-	1
sly-miR5303	DACA009322	4	-1	1	21	14	34	UUUUUGAAGAGUUCGAGCAAC	:::: .::::::.:.::.	GCAGCUCCGACUCUUUAGAAG	Cleavage	locus=Chr09:14296476:14297507:-	1
sly-miR5303	DACA017212	4	-1	1	21	1746	1766	UUUUUGAAGAGUUCGAGCAAC	::.:: : .::::::::.:	CGUGUUCAAUUUCUUCAAAGA	Cleavage	locus=Chr02:15648176:15651151:+	1
smo-miR1082b	DACA008865	4	-1	1	21	2328	2348	GUGUUGGCCUGCUGGCCGGCG	::::: ::::::: .::.:.:	CGCCGUCCAGCAGAUCAGCGC	Cleavage	locus=Chr10:9714453:9720437:+	1
smo-miR1088-3p	DACA018179	4	-1	1	21	1574	1594	GCGUGCUCUUUUUCUUCUGUC	::..::..:::::::.:.	AGGAGGGGAGGAAGAGCAUGU	Cleavage	locus=Chr01:14603431:14609298:+	1
smo-miR1097	DACA017576	4	-1	1	21	555	575	UAGCCAUUGUUGUUGUUGGAA	::::::::: :::.:::. :	CUCCAACAACUACAGUGGUCA	Translation	locus=Chr06:2312013:2313801:-	2
smo-miR1113	DACA021755	4	-1	1	21	1216	1236	UGAGCAGUCAUAAGGUAGCCU	: :::.:::: ::..::::..	AAGCUGCCUUCUGGUUGCUUG	Translation	locus=Chr09:9598434:9601733:-	1
sof-miR168a	DACA025095	4	-1	1	21	511	531	UCGCUUGGUGCAGAUCGGGAC	::: ::::::::::: .:	AACCCCAUCUGCACCAACUGC	Cleavage	locus=Chr52:553692:557879:+	1
sof-miR168a	DACA020351	4	-1	1	21	547	567	UCGCUUGGUGCAGAUCGGGAC	::: ::::::::::: .:	AACCCCAUCUGCACCAACUGC	Cleavage	locus=Chr10:543702:547889:+	1
sof-miR168a	DACA010840	4	-1	1	21	490	510	UCGCUUGGUGCAGAUCGGGAC	::: ::::::::::: .:	AACCCAAUCUGCACCAACUGU	Cleavage	locus=Chr04:24213209:24217283:-	1
ssp-miR1128	DACA006789	4	-1	1	21	783	803	UACUACUCCCUCCGUCCCAAA	::::..:: ::::::.::	GGUGGGGUGGUGGGAGUGGUC	Translation	locus=Chr06:17336365:17338974:+	1
ssp-miR1432	DACA005525	4	-1	1	21	3007	3027	CUCAGGAAAGAUGACACCGAC	.:::: :::. :::.::::	UCUGGUGCCAUUCUUCUUGAG	Cleavage	locus=Chr12:8111140:8126508:-	1
ssp-miR168a	DACA010840	4	-1	1	21	490	510	UCGCUUGGUGCAGAUCGGGAC	::: ::::::::::: .:	AACCCAAUCUGCACCAACUGU	Cleavage	locus=Chr04:24213209:24217283:-	1
ssp-miR168a	DACA025095	4	-1	1	21	511	531	UCGCUUGGUGCAGAUCGGGAC	::: ::::::::::: .:	AACCCCAUCUGCACCAACUGC	Cleavage	locus=Chr52:553692:557879:+	1
ssp-miR168a	DACA020351	4	-1	1	21	547	567	UCGCUUGGUGCAGAUCGGGAC	::: ::::::::::: .:	AACCCCAUCUGCACCAACUGC	Cleavage	locus=Chr10:543702:547889:+	1
ssp-miR444c-3p	DACA015342	4	-1	1	21	381	401	UGCAGUUGUUGUCUCAAGCUU	: :: :.::.::::::::	AUACAUGCGGCAGCAACUGCA	Cleavage	locus=Chr07:24317952:24325668:-	1
stu-miR172a-5p	DACA002672	4	-1	1	21	1236	1256	GUAGCAUAAUCAAGAUUCACA	:::::::::: :: :::::	AGUGAAUCUUGCUUUUGCUAA	Translation	locus=Chr07:12662273:12669644:-	1
stu-miR395a	DACA005525	4	-1	1	21	1519	1539	CUGAAGUGUUUGGGGGAACUC	:::::. :.:::.::.::::	GAGUUUGCUCAAGCAUUUCAU	Cleavage	locus=Chr12:8111140:8126508:-	1
stu-miR395b	DACA005525	4	-1	1	21	1519	1539	CUGAAGUGUUUGGGGGAACUC	:::::. :.:::.::.::::	GAGUUUGCUCAAGCAUUUCAU	Cleavage	locus=Chr12:8111140:8126508:-	1
stu-miR395c	DACA005525	4	-1	1	21	1519	1539	CUGAAGUGUUUGGGGGAACUC	:::::. :.:::.::.::::	GAGUUUGCUCAAGCAUUUCAU	Cleavage	locus=Chr12:8111140:8126508:-	1
stu-miR395d	DACA005525	4	-1	1	21	1519	1539	CUGAAGUGUUUGGGGGAACUC	:::::. :.:::.::.::::	GAGUUUGCUCAAGCAUUUCAU	Cleavage	locus=Chr12:8111140:8126508:-	1
stu-miR395e	DACA005525	4	-1	1	21	1519	1539	CUGAAGUGUUUGGGGGAACUC	:::::. :.:::.::.::::	GAGUUUGCUCAAGCAUUUCAU	Cleavage	locus=Chr12:8111140:8126508:-	1
stu-miR395f	DACA005525	4	-1	1	21	1519	1539	CUGAAGUGUUUGGGGGAACUC	:::::. :.:::.::.::::	GAGUUUGCUCAAGCAUUUCAU	Cleavage	locus=Chr12:8111140:8126508:-	1
stu-miR395g	DACA005525	4	-1	1	21	1519	1539	CUGAAGUGUUUGGGGGAACUC	:::::. :.:::.::.::::	GAGUUUGCUCAAGCAUUUCAU	Cleavage	locus=Chr12:8111140:8126508:-	1
stu-miR395h	DACA005525	4	-1	1	21	1519	1539	CUGAAGUGUUUGGGGGAACUC	:::::. :.:::.::.::::	GAGUUUGCUCAAGCAUUUCAU	Cleavage	locus=Chr12:8111140:8126508:-	1
stu-miR395i	DACA005525	4	-1	1	21	1519	1539	CUGAAGUGUUUGGGGGAACUC	:::::. :.:::.::.::::	GAGUUUGCUCAAGCAUUUCAU	Cleavage	locus=Chr12:8111140:8126508:-	1
stu-miR395j	DACA005525	4	-1	1	21	1519	1539	CUGAAGUGUUUGGGGGAACUC	:::::. :.:::.::.::::	GAGUUUGCUCAAGCAUUUCAU	Cleavage	locus=Chr12:8111140:8126508:-	1
stu-miR397-3p	DACA022171	4	-1	1	21	1427	1447	CAUCAACGCUACACUCAAUCA	:. ::: :::::::: ::::	GGGCUGACUGUAGCGUCGAUG	Cleavage	locus=Chr02:2486221:2491454:+	1
stu-miR530	DACA006215	4	-1	1	21	17	37	UCUGCAUUUGCACCUGCACCU	: : : ::: ::::::::::.	AAGAGGAGGAGCAAAUGCAGG	Cleavage	locus=Chr06:7083522:7085003:-	1
stu-miR5303g	DACA015342	4	-1	1	24	2351	2374	AUAUUUUUGAAGAGUCUGAGCAAC	::.:: :: :.::::::.:::	UAUGUUCUGAAUUUUCAAAGAUAA	Cleavage	locus=Chr07:24317952:24325668:-	1
stu-miR5303i	DACA015342	4	-1	1	24	2351	2374	AUAUUUUUGAAGAGUCUGAGCAAC	::.:: :: :.::::::.:::	UAUGUUCUGAAUUUUCAAAGAUAA	Cleavage	locus=Chr07:24317952:24325668:-	1
stu-miR8008a	DACA015342	4	-1	1	24	1519	1542	AUUUCCAGAAAAGCGACGGACAGU	: :: ::::::::::.:.	AGAUCCAGUGGCUUUUCUGGGAGC	Cleavage	locus=Chr07:24317952:24325668:-	1
stu-miR8009	DACA015342	4	-1	1	24	1519	1542	AUUUCCAGAAAAGCGACGGACAGU	: :: ::::::::::.:.	AGAUCCAGUGGCUUUUCUGGGAGC	Cleavage	locus=Chr07:24317952:24325668:-	1
stu-miR8024a-3p	DACA021755	4	-1	1	24	1668	1691	UUGGAGGAUUUGAAGAUUUCAACU	: .::::::: :.::.:::	UCAAAAUGUCUUCAAUUUCUUCAA	Cleavage	locus=Chr09:9598434:9601733:-	1
stu-miR8024a-5p	DACA021755	4	-1	1	24	1668	1691	UUGAAGAAUUUAAAGACUUCAACU	: ::::: :: ::::::::	UCAAAAUGUCUUCAAUUUCUUCAA	Cleavage	locus=Chr09:9598434:9601733:-	1
stu-miR8024b	DACA021755	4	-1	1	24	1668	1691	UUGGAGGAUUUGAAGAUUUCAACU	: .::::::: :.::.:::	UCAAAAUGUCUUCAAUUUCUUCAA	Cleavage	locus=Chr09:9598434:9601733:-	1
stu-miR8029	DACA005525	4	-1	1	24	1126	1149	AGCCAUUUUUCUUUGUUUUGGAGC	..::: :::::::..:::.	UCCAUGAAAAAAAGAAAGGUGGUG	Cleavage	locus=Chr12:8111140:8126508:-	1
stu-miR8035	DACA020352	4	-1	1	22	48	69	UCCAUCUUCAAUAUCACUUUCU	::: :.:::.:::::::	UACAAGAAUUGUUGGAGAUGGA	Cleavage	locus=Chr10:503444:504689:-	1
tae-miR397-5p	DACA009322	4	-1	1	21	578	598	UCACCGGCGCUGCACACAAUG	.:::: ::.:::.::::::	UAUUGAACGCGGCGUCGGUGA	Cleavage	locus=Chr09:14296476:14297507:-	1
tae-miR9652-5p	DACA006215	4	-1	1	22	178	199	CCUGUUUGUCAUUAAGUUUCUU	:.::..:: :.:::..:.::::	AGGAGGCUGAGUGAUGAGCAGG	Cleavage	locus=Chr06:7083522:7085003:-	1
tae-miR9676-5p	DACA009322	4	-1	1	22	127	148	UGGAUGUCAUCGUGGCCGUACA	::::: :.:::::..::.	CAGACGGCGAUGAUGAUGUCUU	Cleavage	locus=Chr09:14296476:14297507:-	1
tae-miR9774	DACA005525	4	-1	1	22	1866	1887	CAAGAUAUUGGGUAUUUCUGUC	::: :...::.:::::::	AGGUGAAUUGUUCAGUAUCUUG	Cleavage	locus=Chr12:8111140:8126508:-	1
tae-miR9782	DACA022464	4	-1	1	24	332	355	GUAUUAGGUUGGUCAAAUUGACGA	:: ::.:::::::..::.	UAGAAAAAAUGGCCAACCUGGUAU	Cleavage	locus=Chr03:28715628:28717834:+	1
tcc-miR395a	DACA005525	4	-1	1	21	1519	1539	CUGAAGUGUUUGGGGGAACUC	:::::. :.:::.::.::::	GAGUUUGCUCAAGCAUUUCAU	Cleavage	locus=Chr12:8111140:8126508:-	1
tcc-miR395b	DACA005525	4	-1	1	21	1519	1539	CUGAAGUGUUUGGGGGAACUC	:::::. :.:::.::.::::	GAGUUUGCUCAAGCAUUUCAU	Cleavage	locus=Chr12:8111140:8126508:-	1
vun-miR395	DACA005525	4	-1	1	21	1519	1539	CUGAAGUGUUUGGGGGAACUC	:::::. :.:::.::.::::	GAGUUUGCUCAAGCAUUUCAU	Cleavage	locus=Chr12:8111140:8126508:-	1
vvi-miR156a	DACA015342	4	-1	1	20	2493	2512	UGACAGAAGAGAGGGAGCAC	: ::.::::::.:::::	UCUCGCCUUCUCUUUUGUCA	Cleavage	locus=Chr07:24317952:24325668:-	1
vvi-miR169l	DACA002429	4	-1	1	21	1247	1267	GAGCCAAGGAUGACUUGCCGU	:.::: .:::::. ::::::.	AUGGCUGGUCAUUGUUGGCUU	Cleavage	locus=Chr11:16707398:16716252:-	1
vvi-miR169m	DACA002429	4	-1	1	21	1247	1267	GAGCCAAGGAUGACUUGCCGG	.::: .:::::. ::::::.	AUGGCUGGUCAUUGUUGGCUU	Cleavage	locus=Chr11:16707398:16716252:-	1
vvi-miR169n	DACA002429	4	-1	1	21	1247	1267	GAGCCAAGGAUGACUUGCCGG	.::: .:::::. ::::::.	AUGGCUGGUCAUUGUUGGCUU	Cleavage	locus=Chr11:16707398:16716252:-	1
vvi-miR169o	DACA002429	4	-1	1	21	1247	1267	GAGCCAAGGAUGACUUGCCGC	.::: .:::::. ::::::.	AUGGCUGGUCAUUGUUGGCUU	Cleavage	locus=Chr11:16707398:16716252:-	1
vvi-miR169p	DACA002429	4	-1	1	21	1247	1267	GAGCCAAGGAUGACUUGCCGG	.::: .:::::. ::::::.	AUGGCUGGUCAUUGUUGGCUU	Cleavage	locus=Chr11:16707398:16716252:-	1
vvi-miR169q	DACA002429	4	-1	1	21	1247	1267	GAGCCAAGGAUGACUUGCCGG	.::: .:::::. ::::::.	AUGGCUGGUCAUUGUUGGCUU	Cleavage	locus=Chr11:16707398:16716252:-	1
vvi-miR395a	DACA005525	4	-1	1	21	1519	1539	CUGAAGUGUUUGGGGGAACUC	:::::. :.:::.::.::::	GAGUUUGCUCAAGCAUUUCAU	Cleavage	locus=Chr12:8111140:8126508:-	1
vvi-miR395b	DACA005525	4	-1	1	21	1519	1539	CUGAAGUGUUUGGGGGAACUC	:::::. :.:::.::.::::	GAGUUUGCUCAAGCAUUUCAU	Cleavage	locus=Chr12:8111140:8126508:-	1
vvi-miR395c	DACA005525	4	-1	1	21	1519	1539	CUGAAGUGUUUGGGGGAACUC	:::::. :.:::.::.::::	GAGUUUGCUCAAGCAUUUCAU	Cleavage	locus=Chr12:8111140:8126508:-	1
vvi-miR395d	DACA005525	4	-1	1	21	1519	1539	CUGAAGUGUUUGGGGGAACUC	:::::. :.:::.::.::::	GAGUUUGCUCAAGCAUUUCAU	Cleavage	locus=Chr12:8111140:8126508:-	1
vvi-miR395e	DACA005525	4	-1	1	21	1519	1539	CUGAAGUGUUUGGGGGAACUC	:::::. :.:::.::.::::	GAGUUUGCUCAAGCAUUUCAU	Cleavage	locus=Chr12:8111140:8126508:-	1
vvi-miR395f	DACA005525	4	-1	1	21	1519	1539	CUGAAGUGUUUGGGGGAACUC	:::::. :.:::.::.::::	GAGUUUGCUCAAGCAUUUCAU	Cleavage	locus=Chr12:8111140:8126508:-	1
vvi-miR395g	DACA005525	4	-1	1	21	1519	1539	CUGAAGUGUUUGGGGGAACUC	:::::. :.:::.::.::::	GAGUUUGCUCAAGCAUUUCAU	Cleavage	locus=Chr12:8111140:8126508:-	1
vvi-miR395h	DACA005525	4	-1	1	21	1519	1539	CUGAAGUGUUUGGGGGAACUC	:::::. :.:::.::.::::	GAGUUUGCUCAAGCAUUUCAU	Cleavage	locus=Chr12:8111140:8126508:-	1
vvi-miR395i	DACA005525	4	-1	1	21	1519	1539	CUGAAGUGUUUGGGGGAACUC	:::::. :.:::.::.::::	GAGUUUGCUCAAGCAUUUCAU	Cleavage	locus=Chr12:8111140:8126508:-	1
vvi-miR395j	DACA005525	4	-1	1	21	1519	1539	CUGAAGUGUUUGGGGGAACUC	:::::. :.:::.::.::::	GAGUUUGCUCAAGCAUUUCAU	Cleavage	locus=Chr12:8111140:8126508:-	1
vvi-miR395k	DACA005525	4	-1	1	21	1519	1539	CUGAAGUGUUUGGGGGAACUC	:::::. :.:::.::.::::	GAGUUUGCUCAAGCAUUUCAU	Cleavage	locus=Chr12:8111140:8126508:-	1
vvi-miR395l	DACA005525	4	-1	1	21	1519	1539	CUGAAGUGUUUGGGGGAACUC	:::::. :.:::.::.::::	GAGUUUGCUCAAGCAUUUCAU	Cleavage	locus=Chr12:8111140:8126508:-	1
vvi-miR395m	DACA005525	4	-1	1	21	1519	1539	CUGAAGUGUUUGGGGGAACUC	:::::. :.:::.::.::::	GAGUUUGCUCAAGCAUUUCAU	Cleavage	locus=Chr12:8111140:8126508:-	1
vvi-miR477b-5p	DACA015342	4	-1	1	22	112	133	ACUCUUUCUCAAGGGCUUCUAG	:.::.:: :::::::..: ::	GUGGAGGCGCUUGAGAGGGUGU	Cleavage	locus=Chr07:24317952:24325668:-	1
zma-miR159e-3p	DACA018089	4	-1	1	21	86	106	AUUGGUUUGAAGGGAGCUCCA	:.::::.:::.::..::.	CCGGGCUCUCUUUAAGUCAGC	Cleavage	locus=Chr11:2157606:2162912:+	1
zma-miR159e-3p	DACA020351	4	-1	1	21	49	69	AUUGGUUUGAAGGGAGCUCCA	: ::::::::::::::	UCUCUCGCCCUUCAAACCAAU	Cleavage	locus=Chr10:543702:547889:+	1
zma-miR164e-3p	DACA022171	4	-1	1	21	2322	2343	CAUGUGUCCGCCCUC-UCCACC	: :::: ::::::::::.:: :	GCUGGACGAGGGCGGACGCAAG	Cleavage	locus=Chr02:2486221:2491454:+	1
zma-miR166k-5p	DACA005525	4	-1	1	21	2949	2969	GGAUUGUUGUCUGGCUCGGGG	..:.:: ..:::.::.::::.	UUCUGAUUUAGAUAAUAAUCU	Cleavage	locus=Chr12:8111140:8126508:-	1
zma-miR166n-5p	DACA005525	4	-1	1	21	2949	2969	GGAUUGUUGUCUGGCUCGGUG	:.:: ..:::.::.::::.	UUCUGAUUUAGAUAAUAAUCU	Cleavage	locus=Chr12:8111140:8126508:-	1
zma-miR168a-5p	DACA010840	4	-1	1	21	490	510	UCGCUUGGUGCAGAUCGGGAC	::: ::::::::::: .:	AACCCAAUCUGCACCAACUGU	Cleavage	locus=Chr04:24213209:24217283:-	1
zma-miR168a-5p	DACA025095	4	-1	1	21	511	531	UCGCUUGGUGCAGAUCGGGAC	::: ::::::::::: .:	AACCCCAUCUGCACCAACUGC	Cleavage	locus=Chr52:553692:557879:+	1
zma-miR168a-5p	DACA020351	4	-1	1	21	547	567	UCGCUUGGUGCAGAUCGGGAC	::: ::::::::::: .:	AACCCCAUCUGCACCAACUGC	Cleavage	locus=Chr10:543702:547889:+	1
zma-miR168b-5p	DACA025095	4	-1	1	21	511	531	UCGCUUGGUGCAGAUCGGGAC	::: ::::::::::: .:	AACCCCAUCUGCACCAACUGC	Cleavage	locus=Chr52:553692:557879:+	1
zma-miR168b-5p	DACA010840	4	-1	1	21	490	510	UCGCUUGGUGCAGAUCGGGAC	::: ::::::::::: .:	AACCCAAUCUGCACCAACUGU	Cleavage	locus=Chr04:24213209:24217283:-	1
zma-miR168b-5p	DACA020351	4	-1	1	21	547	567	UCGCUUGGUGCAGAUCGGGAC	::: ::::::::::: .:	AACCCCAUCUGCACCAACUGC	Cleavage	locus=Chr10:543702:547889:+	1
zma-miR169o-5p	DACA002429	4	-1	1	21	1247	1267	UAGCCAAGAAUGACUUGCCUA	::: .:::::: ::::::	AUGGCUGGUCAUUGUUGGCUU	Cleavage	locus=Chr11:16707398:16716252:-	1
zma-miR2118g	DACA015960	4	-1	1	22	645	666	UUCCUGAUGCCUCCUAUUCCUA	:. :::: :::::: :::: ::	UGAGAAUCGGAGGCUUCAGAAA	Cleavage	locus=Chr03:18533366:18534449:+	1
zma-miR2275b-5p	DACA013303	4	-1	1	21	340	359	AGGAUUAGAGGCAACUGAACC	:::: ::::::: :.::::	CUUUCA-UUGCCUCAAGUCCU	Cleavage	locus=Chr04:5728597:5730529:-	1
zma-miR2275d-3p	DACA015342	4	-1	1	22	318	339	UUUGUUUUCCUCUAAUAUCUCA	: :. :.:::::::::.:.	GCUGUUGAUGGAGGAAAACGAG	Cleavage	locus=Chr07:24317952:24325668:-	1
zma-miR2275d-5p	DACA015668	4	-1	1	21	1536	1556	AGAGUUGGAGGAAAGAAAACU	.::: :: ::::::.:.:::	GGUUGUCCUUCCUCUAGCUCA	Cleavage	locus=Chr08:11066706:11074546:-	1
zma-miR399d-5p	DACA006153	4	-1	1	21	141	161	GUGUGGCUCUCCUCUGGCAUG	.:::.:::::::::.. ::	AGUGCUAGAGGAGAGUUUCAG	Cleavage	locus=Chr05:26188498:26189591:+	1
zma-miR399e-5p	DACA005525	4	-1	1	21	1072	1092	GGGCUUCUCUUUCUUGGCAGG	..:::. ::::: :::.:::.	UUUGCUCAGAAAAAGAGGCCU	Cleavage	locus=Chr12:8111140:8126508:-	1
zma-miR399e-5p	DACA023137	4	-1	1	21	754	774	GGGCUUCUCUUUCUUGGCAGG	:: .::.:.:::.:::::	GAGGCGGAGGAGGAGGAGCCC	Cleavage	locus=Chr08:784609:787172:-	1
zma-miR399h-5p	DACA006153	4	-1	1	21	141	161	GUGCAGUUCUCCUCUGGCACG	::::.::::::::..: ::	AGUGCUAGAGGAGAGUUUCAG	Cleavage	locus=Chr05:26188498:26189591:+	1
zma-miR399i-5p	DACA006153	4	-1	1	21	141	161	GUGCGGCUCUCCUCUGGCAUG	.:::.:::::::::.. ::	AGUGCUAGAGGAGAGUUUCAG	Cleavage	locus=Chr05:26188498:26189591:+	1
zma-miR444a	DACA015342	4	-1	1	21	381	401	UGCAGUUGUUGUCUCAAGCUU	: :: :.::.::::::::	AUACAUGCGGCAGCAACUGCA	Cleavage	locus=Chr07:24317952:24325668:-	1
zma-miR444b	DACA015342	4	-1	1	21	381	401	UGCAGUUGUUGUCUCAAGCUU	: :: :.::.::::::::	AUACAUGCGGCAGCAACUGCA	Cleavage	locus=Chr07:24317952:24325668:-	1
zma-miR482-5p	DACA018089	4	-1	1	19	1988	2006	UGGGAGAUGAAGGAGCCUU	::::::::::.:: .:.:	CAGGCUCCUUCGUCAUCUA	Cleavage	locus=Chr11:2157606:2162912:+	1
aau-miR172	DACA018179	4.5	-1	1	23	1053	1075	UGAGAAUCUUGAUGAUGCUGCAU	:: : :..:..:::::::.:	GAUCAACCUUGUUGAGAUUCUUA	Cleavage	locus=Chr01:14603431:14609298:+	1
ahy-miR3508	DACA000927	4.5	-1	1	21	387	407	UAGAGGGUCCCCAUGUUCUCA	:: ::::::: ::::::. :	GGAAAACAUGGUGACCCUUGA	Translation	locus=Chr10:17698392:17699669:-	1
ahy-miR3513-3p	DACA005525	4.5	-1	1	21	1001	1021	UUGAUAAGAUAGAAAUUGUAU	: ::: ::::.:.::::: :	CUCCAAAUUCUGUUUUAUCUA	Cleavage	locus=Chr12:8111140:8126508:-	1
ahy-miR3513-5p	DACA005525	4.5	-1	1	21	930	950	UUAAUUUCUGAGUUUGUCAUC	:::::.::::::: :.:	UGCAACAAAUUCAGAAAAUGA	Cleavage	locus=Chr12:8111140:8126508:-	1
ahy-miR408-3p	DACA015342	4.5	-1	1	21	1138	1158	AUGCACUGCCUCUUCCCUGGC	.::: :.::: :..:::.::	AUCAGUGGAGAAGUGGUGUAU	Translation	locus=Chr07:24317952:24325668:-	1
aly-miR159b-3p	DACA022171	4.5	-1	1	21	2134	2154	UUUGGAUUGAAGGGAGCUCUU	:. : .:::::..:::.::	GUGGACCUCCUUCGGUCCGAA	Cleavage	locus=Chr02:2486221:2491454:+	1
aly-miR162a-5p	DACA008865	4.5	-1	1	21	2216	2236	GGAGGCAGCGGUUCAUCGAUC	:: :::.:: ::::.::..	CCUCCAUGGACGGCUGUCUUU	Translation	locus=Chr10:9714453:9720437:+	1
aly-miR162b-5p	DACA008865	4.5	-1	1	21	2216	2236	GGAGGCAGCGGUUCAUCGAUC	:: :::.:: ::::.::..	CCUCCAUGGACGGCUGUCUUU	Translation	locus=Chr10:9714453:9720437:+	1
aly-miR163-3p.1	DACA008865	4.5	-1	1	23	1263	1285	UGAAGAGGACUUGGAACUCGAUC	:::::.::::::::::	UGCAGAGUUUCAAGUCCUCUCAC	Cleavage	locus=Chr10:9714453:9720437:+	1
aly-miR168a-5p	DACA020351	4.5	-1	1	21	547	567	UCGCUUGGUGCAGGUCGGGAA	::: :.::::::::: .:	AACCCCAUCUGCACCAACUGC	Cleavage	locus=Chr10:543702:547889:+	1
aly-miR168a-5p	DACA010840	4.5	-1	1	21	490	510	UCGCUUGGUGCAGGUCGGGAA	::: :.::::::::: .:	AACCCAAUCUGCACCAACUGU	Cleavage	locus=Chr04:24213209:24217283:-	1
aly-miR168a-5p	DACA025095	4.5	-1	1	21	511	531	UCGCUUGGUGCAGGUCGGGAA	::: :.::::::::: .:	AACCCCAUCUGCACCAACUGC	Cleavage	locus=Chr52:553692:557879:+	1
aly-miR168b-5p	DACA020351	4.5	-1	1	21	547	567	UCGCUUGGUGCAGGUCGGGAA	::: :.::::::::: .:	AACCCCAUCUGCACCAACUGC	Cleavage	locus=Chr10:543702:547889:+	1
aly-miR168b-5p	DACA010840	4.5	-1	1	21	490	510	UCGCUUGGUGCAGGUCGGGAA	::: :.::::::::: .:	AACCCAAUCUGCACCAACUGU	Cleavage	locus=Chr04:24213209:24217283:-	1
aly-miR168b-5p	DACA025095	4.5	-1	1	21	511	531	UCGCUUGGUGCAGGUCGGGAA	::: :.::::::::: .:	AACCCCAUCUGCACCAACUGC	Cleavage	locus=Chr52:553692:557879:+	1
aly-miR169a-5p	DACA002429	4.5	-1	1	21	1247	1267	CAGCCAAGGAUGACUUGCCGA	.::: .:::::. ::::::	AUGGCUGGUCAUUGUUGGCUU	Cleavage	locus=Chr11:16707398:16716252:-	1
aly-miR169b-5p	DACA002429	4.5	-1	1	21	1247	1267	CAGCCAAGGAUGACUUGCCGG	.::: .:::::. ::::::	AUGGCUGGUCAUUGUUGGCUU	Cleavage	locus=Chr11:16707398:16716252:-	1
aly-miR169c-5p	DACA002429	4.5	-1	1	21	1247	1267	CAGCCAAGGAUGACUUGCCGG	.::: .:::::. ::::::	AUGGCUGGUCAUUGUUGGCUU	Cleavage	locus=Chr11:16707398:16716252:-	1
aly-miR169d-5p	DACA002429	4.5	-1	1	21	1248	1268	UGAGCCAAGGAUGACUUGCCG	.::: .:::::. ::::::..	UGGCUGGUCAUUGUUGGCUUG	Cleavage	locus=Chr11:16707398:16716252:-	1
aly-miR169d-5p	DACA000929	4.5	-1	1	21	842	862	UGAGCCAAGGAUGACUUGCCG	::.. : ::::::::::..	GCGCGGCUGAUCCUUGGCUUG	Cleavage	locus=Chr10:17659209:17661561:-	1
aly-miR169e-5p	DACA002429	4.5	-1	1	21	1248	1268	UGAGCCAAGGAUGACUUGCCG	.::: .:::::. ::::::..	UGGCUGGUCAUUGUUGGCUUG	Cleavage	locus=Chr11:16707398:16716252:-	1
aly-miR169e-5p	DACA000929	4.5	-1	1	21	842	862	UGAGCCAAGGAUGACUUGCCG	::.. : ::::::::::..	GCGCGGCUGAUCCUUGGCUUG	Cleavage	locus=Chr10:17659209:17661561:-	1
aly-miR169f-5p	DACA002429	4.5	-1	1	21	1248	1268	UGAGCCAAGGAUGACUUGCCG	.::: .:::::. ::::::..	UGGCUGGUCAUUGUUGGCUUG	Cleavage	locus=Chr11:16707398:16716252:-	1
aly-miR169f-5p	DACA000929	4.5	-1	1	21	842	862	UGAGCCAAGGAUGACUUGCCG	::.. : ::::::::::..	GCGCGGCUGAUCCUUGGCUUG	Cleavage	locus=Chr10:17659209:17661561:-	1
aly-miR169g-5p	DACA002429	4.5	-1	1	21	1248	1268	UGAGCCAAGGAUGACUUGCCG	.::: .:::::. ::::::..	UGGCUGGUCAUUGUUGGCUUG	Cleavage	locus=Chr11:16707398:16716252:-	1
aly-miR169g-5p	DACA000929	4.5	-1	1	21	842	862	UGAGCCAAGGAUGACUUGCCG	::.. : ::::::::::..	GCGCGGCUGAUCCUUGGCUUG	Cleavage	locus=Chr10:17659209:17661561:-	1
aly-miR169h-5p	DACA002429	4.5	-1	1	21	1247	1267	UAGCCAAGGAUGACUUGCCUG	::: .:::::. ::::::	AUGGCUGGUCAUUGUUGGCUU	Cleavage	locus=Chr11:16707398:16716252:-	1
aly-miR169i-5p	DACA002429	4.5	-1	1	21	1247	1267	UAGCCAAGGAUGACUUGCCUG	::: .:::::. ::::::	AUGGCUGGUCAUUGUUGGCUU	Cleavage	locus=Chr11:16707398:16716252:-	1
aly-miR169j-5p	DACA002429	4.5	-1	1	21	1247	1267	UAGCCAAGGAUGACUUGCCUG	::: .:::::. ::::::	AUGGCUGGUCAUUGUUGGCUU	Cleavage	locus=Chr11:16707398:16716252:-	1
aly-miR169k-5p	DACA002429	4.5	-1	1	21	1247	1267	UAGCCAAGGAUGACUUGCCUG	::: .:::::. ::::::	AUGGCUGGUCAUUGUUGGCUU	Cleavage	locus=Chr11:16707398:16716252:-	1
aly-miR169l-5p	DACA002429	4.5	-1	1	21	1247	1267	UAGCCAAGGAUGACUUGCCUG	::: .:::::. ::::::	AUGGCUGGUCAUUGUUGGCUU	Cleavage	locus=Chr11:16707398:16716252:-	1
[truncated: 3,441 more rows]

## Sheet: Ac. calamus
miRNA_Acc.	Target_Acc.	Expectation	UPE$	miRNA_start	miRNA_end	Target_start	Target_end	miRNA_aligned_fragment	alignment	Target_aligned_fragment	Inhibition	Target_Desc.	Multiplicity
far-miR166	CP_A06g00792	0	-1	1	21	554	574	CCGGACCAGGCUUCAUCCCAG	:::::::::::::::::::::	CUGGGAUGAAGCCUGGUCCGG	Cleavage	locus=Chr06:9760801:9778666:+	1
far-miR166	CP_A06g00796	0	-1	1	21	554	574	CCGGACCAGGCUUCAUCCCAG	:::::::::::::::::::::	CUGGGAUGAAGCCUGGUCCGG	Cleavage	locus=Chr06:9819103:9829000:+	1
far-miR166	CP_B18g01039	0	-1	1	21	554	574	CCGGACCAGGCUUCAUCCCAG	:::::::::::::::::::::	CUGGGAUGAAGCCUGGUCCGG	Cleavage	locus=Chr18:19637893:19644842:-	1
far-miR166	CP_B20g00613	0	-1	1	21	554	574	CCGGACCAGGCUUCAUCCCAG	:::::::::::::::::::::	CUGGGAUGAAGCCUGGUCCGG	Cleavage	locus=Chr20:8204475:8211842:-	1
far-miR166	CP_A07g00847	0	-1	1	21	554	574	CCGGACCAGGCUUCAUCCCAG	:::::::::::::::::::::	CUGGGAUGAAGCCUGGUCCGG	Cleavage	locus=Chr07:14812677:14820385:+	1
far-miR166	CP_A09g00712	0	-1	1	21	539	559	CCGGACCAGGCUUCAUCCCAG	.::::::::::::::::::::	UUGGGAUGAAGCCUGGUCCGG	Cleavage	locus=Chr09:8933869:8939115:+	1
far-miR166	CP_B22g00189	0	-1	1	21	539	559	CCGGACCAGGCUUCAUCCCAG	.::::::::::::::::::::	UUGGGAUGAAGCCUGGUCCGG	Cleavage	locus=Chr22:2826280:2831512:+	1
far-miR166	CP_B18g02110	0	-1	1	21	410	430	CCGGACCAGGCUUCAUCCCAG	: :::::::::::::::::::	CCGGGAUGAAGCCUGGUCCGG	Cleavage	locus=Chr18:32796467:32804508:-	1
pta-miR166c	CP_A06g00792	0	-1	1	21	554	574	CCGGACCAGGCUUCAUCCCAG	:::::::::::::::::::::	CUGGGAUGAAGCCUGGUCCGG	Cleavage	locus=Chr06:9760801:9778666:+	1
pta-miR166c	CP_A06g00796	0	-1	1	21	554	574	CCGGACCAGGCUUCAUCCCAG	:::::::::::::::::::::	CUGGGAUGAAGCCUGGUCCGG	Cleavage	locus=Chr06:9819103:9829000:+	1
pta-miR166c	CP_B18g01039	0	-1	1	21	554	574	CCGGACCAGGCUUCAUCCCAG	:::::::::::::::::::::	CUGGGAUGAAGCCUGGUCCGG	Cleavage	locus=Chr18:19637893:19644842:-	1
pta-miR166c	CP_B20g00613	0	-1	1	21	554	574	CCGGACCAGGCUUCAUCCCAG	:::::::::::::::::::::	CUGGGAUGAAGCCUGGUCCGG	Cleavage	locus=Chr20:8204475:8211842:-	1
pta-miR166c	CP_A07g00847	0	-1	1	21	554	574	CCGGACCAGGCUUCAUCCCAG	:::::::::::::::::::::	CUGGGAUGAAGCCUGGUCCGG	Cleavage	locus=Chr07:14812677:14820385:+	1
pta-miR166c	CP_A09g00712	0	-1	1	21	539	559	CCGGACCAGGCUUCAUCCCAG	.::::::::::::::::::::	UUGGGAUGAAGCCUGGUCCGG	Cleavage	locus=Chr09:8933869:8939115:+	1
pta-miR166c	CP_B22g00189	0	-1	1	21	539	559	CCGGACCAGGCUUCAUCCCAG	.::::::::::::::::::::	UUGGGAUGAAGCCUGGUCCGG	Cleavage	locus=Chr22:2826280:2831512:+	1
pta-miR166c	CP_B18g02110	0	-1	1	21	410	430	CCGGACCAGGCUUCAUCCCAG	: :::::::::::::::::::	CCGGGAUGAAGCCUGGUCCGG	Cleavage	locus=Chr18:32796467:32804508:-	1
aly-miR165a-3p	CP_A06g00792	0.5	-1	1	20	555	574	UCGGACCAGGCUUCAUCCCC	::::::::::::::::::.	UGGGAUGAAGCCUGGUCCGG	Cleavage	locus=Chr06:9760801:9778666:+	1
aly-miR165a-3p	CP_B18g02110	0.5	-1	1	20	411	430	UCGGACCAGGCUUCAUCCCC	::::::::::::::::::.	CGGGAUGAAGCCUGGUCCGG	Cleavage	locus=Chr18:32796467:32804508:-	1
aly-miR165a-3p	CP_B22g00189	0.5	-1	1	20	540	559	UCGGACCAGGCUUCAUCCCC	::::::::::::::::::.	UGGGAUGAAGCCUGGUCCGG	Cleavage	locus=Chr22:2826280:2831512:+	1
aly-miR165a-3p	CP_A09g00712	0.5	-1	1	20	540	559	UCGGACCAGGCUUCAUCCCC	::::::::::::::::::.	UGGGAUGAAGCCUGGUCCGG	Cleavage	locus=Chr09:8933869:8939115:+	1
aly-miR165a-3p	CP_A06g00796	0.5	-1	1	20	555	574	UCGGACCAGGCUUCAUCCCC	::::::::::::::::::.	UGGGAUGAAGCCUGGUCCGG	Cleavage	locus=Chr06:9819103:9829000:+	1
aly-miR165a-3p	CP_B18g01039	0.5	-1	1	20	555	574	UCGGACCAGGCUUCAUCCCC	::::::::::::::::::.	UGGGAUGAAGCCUGGUCCGG	Cleavage	locus=Chr18:19637893:19644842:-	1
aly-miR165a-3p	CP_B20g00613	0.5	-1	1	20	555	574	UCGGACCAGGCUUCAUCCCC	::::::::::::::::::.	UGGGAUGAAGCCUGGUCCGG	Cleavage	locus=Chr20:8204475:8211842:-	1
aly-miR165a-3p	CP_A07g00847	0.5	-1	1	20	555	574	UCGGACCAGGCUUCAUCCCC	::::::::::::::::::.	UGGGAUGAAGCCUGGUCCGG	Cleavage	locus=Chr07:14812677:14820385:+	1
aly-miR165b-3p	CP_B22g00189	0.5	-1	1	20	540	559	UCGGACCAGGCUUCAUCCCC	::::::::::::::::::.	UGGGAUGAAGCCUGGUCCGG	Cleavage	locus=Chr22:2826280:2831512:+	1
aly-miR165b-3p	CP_A09g00712	0.5	-1	1	20	540	559	UCGGACCAGGCUUCAUCCCC	::::::::::::::::::.	UGGGAUGAAGCCUGGUCCGG	Cleavage	locus=Chr09:8933869:8939115:+	1
aly-miR165b-3p	CP_A06g00796	0.5	-1	1	20	555	574	UCGGACCAGGCUUCAUCCCC	::::::::::::::::::.	UGGGAUGAAGCCUGGUCCGG	Cleavage	locus=Chr06:9819103:9829000:+	1
aly-miR165b-3p	CP_B18g02110	0.5	-1	1	20	411	430	UCGGACCAGGCUUCAUCCCC	::::::::::::::::::.	CGGGAUGAAGCCUGGUCCGG	Cleavage	locus=Chr18:32796467:32804508:-	1
aly-miR165b-3p	CP_B18g01039	0.5	-1	1	20	555	574	UCGGACCAGGCUUCAUCCCC	::::::::::::::::::.	UGGGAUGAAGCCUGGUCCGG	Cleavage	locus=Chr18:19637893:19644842:-	1
aly-miR165b-3p	CP_A07g00847	0.5	-1	1	20	555	574	UCGGACCAGGCUUCAUCCCC	::::::::::::::::::.	UGGGAUGAAGCCUGGUCCGG	Cleavage	locus=Chr07:14812677:14820385:+	1
aly-miR165b-3p	CP_B20g00613	0.5	-1	1	20	555	574	UCGGACCAGGCUUCAUCCCC	::::::::::::::::::.	UGGGAUGAAGCCUGGUCCGG	Cleavage	locus=Chr20:8204475:8211842:-	1
aly-miR165b-3p	CP_A06g00792	0.5	-1	1	20	555	574	UCGGACCAGGCUUCAUCCCC	::::::::::::::::::.	UGGGAUGAAGCCUGGUCCGG	Cleavage	locus=Chr06:9760801:9778666:+	1
ath-miR165a-3p	CP_A06g00792	0.5	-1	1	21	554	574	UCGGACCAGGCUUCAUCCCCC	::::::::::::::::::.	CUGGGAUGAAGCCUGGUCCGG	Cleavage	locus=Chr06:9760801:9778666:+	1
ath-miR165a-3p	CP_A09g00712	0.5	-1	1	21	539	559	UCGGACCAGGCUUCAUCCCCC	::::::::::::::::::.	UUGGGAUGAAGCCUGGUCCGG	Cleavage	locus=Chr09:8933869:8939115:+	1
ath-miR165a-3p	CP_B22g00189	0.5	-1	1	21	539	559	UCGGACCAGGCUUCAUCCCCC	::::::::::::::::::.	UUGGGAUGAAGCCUGGUCCGG	Cleavage	locus=Chr22:2826280:2831512:+	1
ath-miR165a-3p	CP_A06g00796	0.5	-1	1	21	554	574	UCGGACCAGGCUUCAUCCCCC	::::::::::::::::::.	CUGGGAUGAAGCCUGGUCCGG	Cleavage	locus=Chr06:9819103:9829000:+	1
ath-miR165a-3p	CP_B18g02110	0.5	-1	1	21	410	430	UCGGACCAGGCUUCAUCCCCC	::::::::::::::::::.	CCGGGAUGAAGCCUGGUCCGG	Cleavage	locus=Chr18:32796467:32804508:-	1
ath-miR165a-3p	CP_B18g01039	0.5	-1	1	21	554	574	UCGGACCAGGCUUCAUCCCCC	::::::::::::::::::.	CUGGGAUGAAGCCUGGUCCGG	Cleavage	locus=Chr18:19637893:19644842:-	1
ath-miR165a-3p	CP_B20g00613	0.5	-1	1	21	554	574	UCGGACCAGGCUUCAUCCCCC	::::::::::::::::::.	CUGGGAUGAAGCCUGGUCCGG	Cleavage	locus=Chr20:8204475:8211842:-	1
ath-miR165a-3p	CP_A07g00847	0.5	-1	1	21	554	574	UCGGACCAGGCUUCAUCCCCC	::::::::::::::::::.	CUGGGAUGAAGCCUGGUCCGG	Cleavage	locus=Chr07:14812677:14820385:+	1
ath-miR165b	CP_A06g00792	0.5	-1	1	21	554	574	UCGGACCAGGCUUCAUCCCCC	::::::::::::::::::.	CUGGGAUGAAGCCUGGUCCGG	Cleavage	locus=Chr06:9760801:9778666:+	1
ath-miR165b	CP_A09g00712	0.5	-1	1	21	539	559	UCGGACCAGGCUUCAUCCCCC	::::::::::::::::::.	UUGGGAUGAAGCCUGGUCCGG	Cleavage	locus=Chr09:8933869:8939115:+	1
ath-miR165b	CP_B22g00189	0.5	-1	1	21	539	559	UCGGACCAGGCUUCAUCCCCC	::::::::::::::::::.	UUGGGAUGAAGCCUGGUCCGG	Cleavage	locus=Chr22:2826280:2831512:+	1
ath-miR165b	CP_A06g00796	0.5	-1	1	21	554	574	UCGGACCAGGCUUCAUCCCCC	::::::::::::::::::.	CUGGGAUGAAGCCUGGUCCGG	Cleavage	locus=Chr06:9819103:9829000:+	1
ath-miR165b	CP_B18g02110	0.5	-1	1	21	410	430	UCGGACCAGGCUUCAUCCCCC	::::::::::::::::::.	CCGGGAUGAAGCCUGGUCCGG	Cleavage	locus=Chr18:32796467:32804508:-	1
ath-miR165b	CP_B18g01039	0.5	-1	1	21	554	574	UCGGACCAGGCUUCAUCCCCC	::::::::::::::::::.	CUGGGAUGAAGCCUGGUCCGG	Cleavage	locus=Chr18:19637893:19644842:-	1
ath-miR165b	CP_B20g00613	0.5	-1	1	21	554	574	UCGGACCAGGCUUCAUCCCCC	::::::::::::::::::.	CUGGGAUGAAGCCUGGUCCGG	Cleavage	locus=Chr20:8204475:8211842:-	1
ath-miR165b	CP_A07g00847	0.5	-1	1	21	554	574	UCGGACCAGGCUUCAUCCCCC	::::::::::::::::::.	CUGGGAUGAAGCCUGGUCCGG	Cleavage	locus=Chr07:14812677:14820385:+	1
bna-miR166f	CP_B22g00189	0.5	-1	1	21	539	559	UCGGACCAGGCUUCAUCCCCC	::::::::::::::::::.	UUGGGAUGAAGCCUGGUCCGG	Cleavage	locus=Chr22:2826280:2831512:+	1
bna-miR166f	CP_A09g00712	0.5	-1	1	21	539	559	UCGGACCAGGCUUCAUCCCCC	::::::::::::::::::.	UUGGGAUGAAGCCUGGUCCGG	Cleavage	locus=Chr09:8933869:8939115:+	1
bna-miR166f	CP_B18g02110	0.5	-1	1	21	410	430	UCGGACCAGGCUUCAUCCCCC	::::::::::::::::::.	CCGGGAUGAAGCCUGGUCCGG	Cleavage	locus=Chr18:32796467:32804508:-	1
bna-miR166f	CP_B18g01039	0.5	-1	1	21	554	574	UCGGACCAGGCUUCAUCCCCC	::::::::::::::::::.	CUGGGAUGAAGCCUGGUCCGG	Cleavage	locus=Chr18:19637893:19644842:-	1
bna-miR166f	CP_A07g00847	0.5	-1	1	21	554	574	UCGGACCAGGCUUCAUCCCCC	::::::::::::::::::.	CUGGGAUGAAGCCUGGUCCGG	Cleavage	locus=Chr07:14812677:14820385:+	1
bna-miR166f	CP_B20g00613	0.5	-1	1	21	554	574	UCGGACCAGGCUUCAUCCCCC	::::::::::::::::::.	CUGGGAUGAAGCCUGGUCCGG	Cleavage	locus=Chr20:8204475:8211842:-	1
bna-miR166f	CP_A06g00796	0.5	-1	1	21	554	574	UCGGACCAGGCUUCAUCCCCC	::::::::::::::::::.	CUGGGAUGAAGCCUGGUCCGG	Cleavage	locus=Chr06:9819103:9829000:+	1
bna-miR166f	CP_A06g00792	0.5	-1	1	21	554	574	UCGGACCAGGCUUCAUCCCCC	::::::::::::::::::.	CUGGGAUGAAGCCUGGUCCGG	Cleavage	locus=Chr06:9760801:9778666:+	1
ppt-miR166j	CP_A06g00792	0.5	-1	1	21	555	575	UCCGGACCAGGCUUCAUUCCC	::.:::::::::::::::::	UGGGAUGAAGCCUGGUCCGGA	Cleavage	locus=Chr06:9760801:9778666:+	1
ppt-miR166j	CP_A06g00796	0.5	-1	1	21	555	575	UCCGGACCAGGCUUCAUUCCC	::.:::::::::::::::::	UGGGAUGAAGCCUGGUCCGGA	Cleavage	locus=Chr06:9819103:9829000:+	1
ppt-miR166j	CP_B18g02110	0.5	-1	1	21	411	431	UCCGGACCAGGCUUCAUUCCC	::.:::::::::::::::::	CGGGAUGAAGCCUGGUCCGGA	Cleavage	locus=Chr18:32796467:32804508:-	1
ppt-miR166j	CP_B18g01039	0.5	-1	1	21	555	575	UCCGGACCAGGCUUCAUUCCC	::.:::::::::::::::::	UGGGAUGAAGCCUGGUCCGGA	Cleavage	locus=Chr18:19637893:19644842:-	1
ppt-miR166j	CP_B20g00613	0.5	-1	1	21	555	575	UCCGGACCAGGCUUCAUUCCC	::.:::::::::::::::::	UGGGAUGAAGCCUGGUCCGGA	Cleavage	locus=Chr20:8204475:8211842:-	1
ppt-miR166j	CP_A07g00847	0.5	-1	1	21	555	575	UCCGGACCAGGCUUCAUUCCC	::.:::::::::::::::::	UGGGAUGAAGCCUGGUCCGGA	Cleavage	locus=Chr07:14812677:14820385:+	1
ppt-miR166j	CP_A09g00712	0.5	-1	1	21	540	560	UCCGGACCAGGCUUCAUUCCC	::.:::::::::::::::::	UGGGAUGAAGCCUGGUCCGGA	Cleavage	locus=Chr09:8933869:8939115:+	1
ppt-miR166j	CP_B22g00189	0.5	-1	1	21	540	560	UCCGGACCAGGCUUCAUUCCC	::.:::::::::::::::::	UGGGAUGAAGCCUGGUCCGGA	Cleavage	locus=Chr22:2826280:2831512:+	1
ppt-miR166k	CP_A06g00796	0.5	-1	1	21	555	575	UCCGGACCAGGCUUCAUUCCC	::.:::::::::::::::::	UGGGAUGAAGCCUGGUCCGGA	Cleavage	locus=Chr06:9819103:9829000:+	1
ppt-miR166k	CP_B18g02110	0.5	-1	1	21	411	431	UCCGGACCAGGCUUCAUUCCC	::.:::::::::::::::::	CGGGAUGAAGCCUGGUCCGGA	Cleavage	locus=Chr18:32796467:32804508:-	1
ppt-miR166k	CP_B18g01039	0.5	-1	1	21	555	575	UCCGGACCAGGCUUCAUUCCC	::.:::::::::::::::::	UGGGAUGAAGCCUGGUCCGGA	Cleavage	locus=Chr18:19637893:19644842:-	1
ppt-miR166k	CP_A07g00847	0.5	-1	1	21	555	575	UCCGGACCAGGCUUCAUUCCC	::.:::::::::::::::::	UGGGAUGAAGCCUGGUCCGGA	Cleavage	locus=Chr07:14812677:14820385:+	1
ppt-miR166k	CP_B20g00613	0.5	-1	1	21	555	575	UCCGGACCAGGCUUCAUUCCC	::.:::::::::::::::::	UGGGAUGAAGCCUGGUCCGGA	Cleavage	locus=Chr20:8204475:8211842:-	1
ppt-miR166k	CP_A09g00712	0.5	-1	1	21	540	560	UCCGGACCAGGCUUCAUUCCC	::.:::::::::::::::::	UGGGAUGAAGCCUGGUCCGGA	Cleavage	locus=Chr09:8933869:8939115:+	1
ppt-miR166k	CP_B22g00189	0.5	-1	1	21	540	560	UCCGGACCAGGCUUCAUUCCC	::.:::::::::::::::::	UGGGAUGAAGCCUGGUCCGGA	Cleavage	locus=Chr22:2826280:2831512:+	1
ppt-miR166k	CP_A06g00792	0.5	-1	1	21	555	575	UCCGGACCAGGCUUCAUUCCC	::.:::::::::::::::::	UGGGAUGAAGCCUGGUCCGGA	Cleavage	locus=Chr06:9760801:9778666:+	1
ppt-miR166l	CP_B18g02110	0.5	-1	1	21	411	431	UCCGGACCAGGCUUCAUUCCC	::.:::::::::::::::::	CGGGAUGAAGCCUGGUCCGGA	Cleavage	locus=Chr18:32796467:32804508:-	1
ppt-miR166l	CP_A07g00847	0.5	-1	1	21	555	575	UCCGGACCAGGCUUCAUUCCC	::.:::::::::::::::::	UGGGAUGAAGCCUGGUCCGGA	Cleavage	locus=Chr07:14812677:14820385:+	1
ppt-miR166l	CP_B18g01039	0.5	-1	1	21	555	575	UCCGGACCAGGCUUCAUUCCC	::.:::::::::::::::::	UGGGAUGAAGCCUGGUCCGGA	Cleavage	locus=Chr18:19637893:19644842:-	1
ppt-miR166l	CP_B20g00613	0.5	-1	1	21	555	575	UCCGGACCAGGCUUCAUUCCC	::.:::::::::::::::::	UGGGAUGAAGCCUGGUCCGGA	Cleavage	locus=Chr20:8204475:8211842:-	1
ppt-miR166l	CP_B22g00189	0.5	-1	1	21	540	560	UCCGGACCAGGCUUCAUUCCC	::.:::::::::::::::::	UGGGAUGAAGCCUGGUCCGGA	Cleavage	locus=Chr22:2826280:2831512:+	1
ppt-miR166l	CP_A09g00712	0.5	-1	1	21	540	560	UCCGGACCAGGCUUCAUUCCC	::.:::::::::::::::::	UGGGAUGAAGCCUGGUCCGGA	Cleavage	locus=Chr09:8933869:8939115:+	1
ppt-miR166l	CP_A06g00792	0.5	-1	1	21	555	575	UCCGGACCAGGCUUCAUUCCC	::.:::::::::::::::::	UGGGAUGAAGCCUGGUCCGGA	Cleavage	locus=Chr06:9760801:9778666:+	1
ppt-miR166l	CP_A06g00796	0.5	-1	1	21	555	575	UCCGGACCAGGCUUCAUUCCC	::.:::::::::::::::::	UGGGAUGAAGCCUGGUCCGGA	Cleavage	locus=Chr06:9819103:9829000:+	1
aly-miR166a-3p	CP_A07g00847	1	-1	1	21	554	574	UCGGACCAGGCUUCAUUCCCC	::.:::::::::::::::.	CUGGGAUGAAGCCUGGUCCGG	Cleavage	locus=Chr07:14812677:14820385:+	1
aly-miR166a-3p	CP_B18g01039	1	-1	1	21	554	574	UCGGACCAGGCUUCAUUCCCC	::.:::::::::::::::.	CUGGGAUGAAGCCUGGUCCGG	Cleavage	locus=Chr18:19637893:19644842:-	1
aly-miR166a-3p	CP_B20g00613	1	-1	1	21	554	574	UCGGACCAGGCUUCAUUCCCC	::.:::::::::::::::.	CUGGGAUGAAGCCUGGUCCGG	Cleavage	locus=Chr20:8204475:8211842:-	1
aly-miR166a-3p	CP_A09g00712	1	-1	1	21	539	559	UCGGACCAGGCUUCAUUCCCC	::.:::::::::::::::.	UUGGGAUGAAGCCUGGUCCGG	Cleavage	locus=Chr09:8933869:8939115:+	1
aly-miR166a-3p	CP_B22g00189	1	-1	1	21	539	559	UCGGACCAGGCUUCAUUCCCC	::.:::::::::::::::.	UUGGGAUGAAGCCUGGUCCGG	Cleavage	locus=Chr22:2826280:2831512:+	1
aly-miR166a-3p	CP_A06g00792	1	-1	1	21	554	574	UCGGACCAGGCUUCAUUCCCC	::.:::::::::::::::.	CUGGGAUGAAGCCUGGUCCGG	Cleavage	locus=Chr06:9760801:9778666:+	1
aly-miR166a-3p	CP_A06g00796	1	-1	1	21	554	574	UCGGACCAGGCUUCAUUCCCC	::.:::::::::::::::.	CUGGGAUGAAGCCUGGUCCGG	Cleavage	locus=Chr06:9819103:9829000:+	1
aly-miR166a-3p	CP_B18g02110	1	-1	1	21	410	430	UCGGACCAGGCUUCAUUCCCC	::.:::::::::::::::.	CCGGGAUGAAGCCUGGUCCGG	Cleavage	locus=Chr18:32796467:32804508:-	1
aly-miR166b-3p	CP_B18g02110	1	-1	1	21	410	430	UCGGACCAGGCUUCAUUCCCC	::.:::::::::::::::.	CCGGGAUGAAGCCUGGUCCGG	Cleavage	locus=Chr18:32796467:32804508:-	1
aly-miR166b-3p	CP_B22g00189	1	-1	1	21	539	559	UCGGACCAGGCUUCAUUCCCC	::.:::::::::::::::.	UUGGGAUGAAGCCUGGUCCGG	Cleavage	locus=Chr22:2826280:2831512:+	1
aly-miR166b-3p	CP_A09g00712	1	-1	1	21	539	559	UCGGACCAGGCUUCAUUCCCC	::.:::::::::::::::.	UUGGGAUGAAGCCUGGUCCGG	Cleavage	locus=Chr09:8933869:8939115:+	1
aly-miR166b-3p	CP_B18g01039	1	-1	1	21	554	574	UCGGACCAGGCUUCAUUCCCC	::.:::::::::::::::.	CUGGGAUGAAGCCUGGUCCGG	Cleavage	locus=Chr18:19637893:19644842:-	1
aly-miR166b-3p	CP_A07g00847	1	-1	1	21	554	574	UCGGACCAGGCUUCAUUCCCC	::.:::::::::::::::.	CUGGGAUGAAGCCUGGUCCGG	Cleavage	locus=Chr07:14812677:14820385:+	1
aly-miR166b-3p	CP_B20g00613	1	-1	1	21	554	574	UCGGACCAGGCUUCAUUCCCC	::.:::::::::::::::.	CUGGGAUGAAGCCUGGUCCGG	Cleavage	locus=Chr20:8204475:8211842:-	1
aly-miR166b-3p	CP_A06g00792	1	-1	1	21	554	574	UCGGACCAGGCUUCAUUCCCC	::.:::::::::::::::.	CUGGGAUGAAGCCUGGUCCGG	Cleavage	locus=Chr06:9760801:9778666:+	1
aly-miR166b-3p	CP_A06g00796	1	-1	1	21	554	574	UCGGACCAGGCUUCAUUCCCC	::.:::::::::::::::.	CUGGGAUGAAGCCUGGUCCGG	Cleavage	locus=Chr06:9819103:9829000:+	1
aly-miR166c-3p	CP_A06g00792	1	-1	1	21	554	574	UCGGACCAGGCUUCAUUCCCC	::.:::::::::::::::.	CUGGGAUGAAGCCUGGUCCGG	Cleavage	locus=Chr06:9760801:9778666:+	1
aly-miR166c-3p	CP_B18g01039	1	-1	1	21	554	574	UCGGACCAGGCUUCAUUCCCC	::.:::::::::::::::.	CUGGGAUGAAGCCUGGUCCGG	Cleavage	locus=Chr18:19637893:19644842:-	1
aly-miR166c-3p	CP_A07g00847	1	-1	1	21	554	574	UCGGACCAGGCUUCAUUCCCC	::.:::::::::::::::.	CUGGGAUGAAGCCUGGUCCGG	Cleavage	locus=Chr07:14812677:14820385:+	1
aly-miR166c-3p	CP_B20g00613	1	-1	1	21	554	574	UCGGACCAGGCUUCAUUCCCC	::.:::::::::::::::.	CUGGGAUGAAGCCUGGUCCGG	Cleavage	locus=Chr20:8204475:8211842:-	1
aly-miR166c-3p	CP_A09g00712	1	-1	1	21	539	559	UCGGACCAGGCUUCAUUCCCC	::.:::::::::::::::.	UUGGGAUGAAGCCUGGUCCGG	Cleavage	locus=Chr09:8933869:8939115:+	1
aly-miR166c-3p	CP_B22g00189	1	-1	1	21	539	559	UCGGACCAGGCUUCAUUCCCC	::.:::::::::::::::.	UUGGGAUGAAGCCUGGUCCGG	Cleavage	locus=Chr22:2826280:2831512:+	1
aly-miR166c-3p	CP_A06g00796	1	-1	1	21	554	574	UCGGACCAGGCUUCAUUCCCC	::.:::::::::::::::.	CUGGGAUGAAGCCUGGUCCGG	Cleavage	locus=Chr06:9819103:9829000:+	1
aly-miR166c-3p	CP_B18g02110	1	-1	1	21	410	430	UCGGACCAGGCUUCAUUCCCC	::.:::::::::::::::.	CCGGGAUGAAGCCUGGUCCGG	Cleavage	locus=Chr18:32796467:32804508:-	1
aly-miR166d-3p	CP_B18g02110	1	-1	1	21	410	430	UCGGACCAGGCUUCAUUCCCC	::.:::::::::::::::.	CCGGGAUGAAGCCUGGUCCGG	Cleavage	locus=Chr18:32796467:32804508:-	1
aly-miR166d-3p	CP_A06g00796	1	-1	1	21	554	574	UCGGACCAGGCUUCAUUCCCC	::.:::::::::::::::.	CUGGGAUGAAGCCUGGUCCGG	Cleavage	locus=Chr06:9819103:9829000:+	1
aly-miR166d-3p	CP_A06g00792	1	-1	1	21	554	574	UCGGACCAGGCUUCAUUCCCC	::.:::::::::::::::.	CUGGGAUGAAGCCUGGUCCGG	Cleavage	locus=Chr06:9760801:9778666:+	1
aly-miR166d-3p	CP_B18g01039	1	-1	1	21	554	574	UCGGACCAGGCUUCAUUCCCC	::.:::::::::::::::.	CUGGGAUGAAGCCUGGUCCGG	Cleavage	locus=Chr18:19637893:19644842:-	1
aly-miR166d-3p	CP_B20g00613	1	-1	1	21	554	574	UCGGACCAGGCUUCAUUCCCC	::.:::::::::::::::.	CUGGGAUGAAGCCUGGUCCGG	Cleavage	locus=Chr20:8204475:8211842:-	1
aly-miR166d-3p	CP_A07g00847	1	-1	1	21	554	574	UCGGACCAGGCUUCAUUCCCC	::.:::::::::::::::.	CUGGGAUGAAGCCUGGUCCGG	Cleavage	locus=Chr07:14812677:14820385:+	1
aly-miR166d-3p	CP_A09g00712	1	-1	1	21	539	559	UCGGACCAGGCUUCAUUCCCC	::.:::::::::::::::.	UUGGGAUGAAGCCUGGUCCGG	Cleavage	locus=Chr09:8933869:8939115:+	1
aly-miR166d-3p	CP_B22g00189	1	-1	1	21	539	559	UCGGACCAGGCUUCAUUCCCC	::.:::::::::::::::.	UUGGGAUGAAGCCUGGUCCGG	Cleavage	locus=Chr22:2826280:2831512:+	1
aly-miR166e-3p	CP_B18g02110	1	-1	1	21	410	430	UCGGACCAGGCUUCAUUCCCC	::.:::::::::::::::.	CCGGGAUGAAGCCUGGUCCGG	Cleavage	locus=Chr18:32796467:32804508:-	1
aly-miR166e-3p	CP_A07g00847	1	-1	1	21	554	574	UCGGACCAGGCUUCAUUCCCC	::.:::::::::::::::.	CUGGGAUGAAGCCUGGUCCGG	Cleavage	locus=Chr07:14812677:14820385:+	1
aly-miR166e-3p	CP_B18g01039	1	-1	1	21	554	574	UCGGACCAGGCUUCAUUCCCC	::.:::::::::::::::.	CUGGGAUGAAGCCUGGUCCGG	Cleavage	locus=Chr18:19637893:19644842:-	1
aly-miR166e-3p	CP_B20g00613	1	-1	1	21	554	574	UCGGACCAGGCUUCAUUCCCC	::.:::::::::::::::.	CUGGGAUGAAGCCUGGUCCGG	Cleavage	locus=Chr20:8204475:8211842:-	1
aly-miR166e-3p	CP_B22g00189	1	-1	1	21	539	559	UCGGACCAGGCUUCAUUCCCC	::.:::::::::::::::.	UUGGGAUGAAGCCUGGUCCGG	Cleavage	locus=Chr22:2826280:2831512:+	1
aly-miR166e-3p	CP_A09g00712	1	-1	1	21	539	559	UCGGACCAGGCUUCAUUCCCC	::.:::::::::::::::.	UUGGGAUGAAGCCUGGUCCGG	Cleavage	locus=Chr09:8933869:8939115:+	1
aly-miR166e-3p	CP_A06g00792	1	-1	1	21	554	574	UCGGACCAGGCUUCAUUCCCC	::.:::::::::::::::.	CUGGGAUGAAGCCUGGUCCGG	Cleavage	locus=Chr06:9760801:9778666:+	1
aly-miR166e-3p	CP_A06g00796	1	-1	1	21	554	574	UCGGACCAGGCUUCAUUCCCC	::.:::::::::::::::.	CUGGGAUGAAGCCUGGUCCGG	Cleavage	locus=Chr06:9819103:9829000:+	1
aly-miR166f-3p	CP_A06g00796	1	-1	1	21	554	574	UCGGACCAGGCUUCAUUCCCC	::.:::::::::::::::.	CUGGGAUGAAGCCUGGUCCGG	Cleavage	locus=Chr06:9819103:9829000:+	1
aly-miR166f-3p	CP_B18g02110	1	-1	1	21	410	430	UCGGACCAGGCUUCAUUCCCC	::.:::::::::::::::.	CCGGGAUGAAGCCUGGUCCGG	Cleavage	locus=Chr18:32796467:32804508:-	1
aly-miR166f-3p	CP_B18g01039	1	-1	1	21	554	574	UCGGACCAGGCUUCAUUCCCC	::.:::::::::::::::.	CUGGGAUGAAGCCUGGUCCGG	Cleavage	locus=Chr18:19637893:19644842:-	1
aly-miR166f-3p	CP_A07g00847	1	-1	1	21	554	574	UCGGACCAGGCUUCAUUCCCC	::.:::::::::::::::.	CUGGGAUGAAGCCUGGUCCGG	Cleavage	locus=Chr07:14812677:14820385:+	1
aly-miR166f-3p	CP_B20g00613	1	-1	1	21	554	574	UCGGACCAGGCUUCAUUCCCC	::.:::::::::::::::.	CUGGGAUGAAGCCUGGUCCGG	Cleavage	locus=Chr20:8204475:8211842:-	1
aly-miR166f-3p	CP_A06g00792	1	-1	1	21	554	574	UCGGACCAGGCUUCAUUCCCC	::.:::::::::::::::.	CUGGGAUGAAGCCUGGUCCGG	Cleavage	locus=Chr06:9760801:9778666:+	1
aly-miR166f-3p	CP_A09g00712	1	-1	1	21	539	559	UCGGACCAGGCUUCAUUCCCC	::.:::::::::::::::.	UUGGGAUGAAGCCUGGUCCGG	Cleavage	locus=Chr09:8933869:8939115:+	1
aly-miR166f-3p	CP_B22g00189	1	-1	1	21	539	559	UCGGACCAGGCUUCAUUCCCC	::.:::::::::::::::.	UUGGGAUGAAGCCUGGUCCGG	Cleavage	locus=Chr22:2826280:2831512:+	1
aly-miR166g-3p	CP_A06g00792	1	-1	1	21	554	574	UCGGACCAGGCUUCAUUCCCC	::.:::::::::::::::.	CUGGGAUGAAGCCUGGUCCGG	Cleavage	locus=Chr06:9760801:9778666:+	1
aly-miR166g-3p	CP_B18g02110	1	-1	1	21	410	430	UCGGACCAGGCUUCAUUCCCC	::.:::::::::::::::.	CCGGGAUGAAGCCUGGUCCGG	Cleavage	locus=Chr18:32796467:32804508:-	1
aly-miR166g-3p	CP_B22g00189	1	-1	1	21	539	559	UCGGACCAGGCUUCAUUCCCC	::.:::::::::::::::.	UUGGGAUGAAGCCUGGUCCGG	Cleavage	locus=Chr22:2826280:2831512:+	1
aly-miR166g-3p	CP_A09g00712	1	-1	1	21	539	559	UCGGACCAGGCUUCAUUCCCC	::.:::::::::::::::.	UUGGGAUGAAGCCUGGUCCGG	Cleavage	locus=Chr09:8933869:8939115:+	1
aly-miR166g-3p	CP_A06g00796	1	-1	1	21	554	574	UCGGACCAGGCUUCAUUCCCC	::.:::::::::::::::.	CUGGGAUGAAGCCUGGUCCGG	Cleavage	locus=Chr06:9819103:9829000:+	1
aly-miR166g-3p	CP_B18g01039	1	-1	1	21	554	574	UCGGACCAGGCUUCAUUCCCC	::.:::::::::::::::.	CUGGGAUGAAGCCUGGUCCGG	Cleavage	locus=Chr18:19637893:19644842:-	1
aly-miR166g-3p	CP_B20g00613	1	-1	1	21	554	574	UCGGACCAGGCUUCAUUCCCC	::.:::::::::::::::.	CUGGGAUGAAGCCUGGUCCGG	Cleavage	locus=Chr20:8204475:8211842:-	1
aly-miR166g-3p	CP_A07g00847	1	-1	1	21	554	574	UCGGACCAGGCUUCAUUCCCC	::.:::::::::::::::.	CUGGGAUGAAGCCUGGUCCGG	Cleavage	locus=Chr07:14812677:14820385:+	1
aly-miR166h-3p	CP_B22g00189	1	-1	1	21	539	559	UCGGACCAGGCUUCAUUCCCC	::.:::::::::::::::.	UUGGGAUGAAGCCUGGUCCGG	Cleavage	locus=Chr22:2826280:2831512:+	1
aly-miR166h-3p	CP_A09g00712	1	-1	1	21	539	559	UCGGACCAGGCUUCAUUCCCC	::.:::::::::::::::.	UUGGGAUGAAGCCUGGUCCGG	Cleavage	locus=Chr09:8933869:8939115:+	1
aly-miR166h-3p	CP_A06g00792	1	-1	1	21	554	574	UCGGACCAGGCUUCAUUCCCC	::.:::::::::::::::.	CUGGGAUGAAGCCUGGUCCGG	Cleavage	locus=Chr06:9760801:9778666:+	1
aly-miR166h-3p	CP_A06g00796	1	-1	1	21	554	574	UCGGACCAGGCUUCAUUCCCC	::.:::::::::::::::.	CUGGGAUGAAGCCUGGUCCGG	Cleavage	locus=Chr06:9819103:9829000:+	1
aly-miR166h-3p	CP_B18g01039	1	-1	1	21	554	574	UCGGACCAGGCUUCAUUCCCC	::.:::::::::::::::.	CUGGGAUGAAGCCUGGUCCGG	Cleavage	locus=Chr18:19637893:19644842:-	1
aly-miR166h-3p	CP_B20g00613	1	-1	1	21	554	574	UCGGACCAGGCUUCAUUCCCC	::.:::::::::::::::.	CUGGGAUGAAGCCUGGUCCGG	Cleavage	locus=Chr20:8204475:8211842:-	1
aly-miR166h-3p	CP_A07g00847	1	-1	1	21	554	574	UCGGACCAGGCUUCAUUCCCC	::.:::::::::::::::.	CUGGGAUGAAGCCUGGUCCGG	Cleavage	locus=Chr07:14812677:14820385:+	1
aly-miR166h-3p	CP_B18g02110	1	-1	1	21	410	430	UCGGACCAGGCUUCAUUCCCC	::.:::::::::::::::.	CCGGGAUGAAGCCUGGUCCGG	Cleavage	locus=Chr18:32796467:32804508:-	1
aqc-miR166a	CP_A07g00847	1	-1	1	21	554	574	UCGGACCAGGCUUCAUUCCUC	::.:::::::::::::::.	CUGGGAUGAAGCCUGGUCCGG	Cleavage	locus=Chr07:14812677:14820385:+	1
aqc-miR166a	CP_B18g01039	1	-1	1	21	554	574	UCGGACCAGGCUUCAUUCCUC	::.:::::::::::::::.	CUGGGAUGAAGCCUGGUCCGG	Cleavage	locus=Chr18:19637893:19644842:-	1
aqc-miR166a	CP_B20g00613	1	-1	1	21	554	574	UCGGACCAGGCUUCAUUCCUC	::.:::::::::::::::.	CUGGGAUGAAGCCUGGUCCGG	Cleavage	locus=Chr20:8204475:8211842:-	1
aqc-miR166a	CP_A06g00796	1	-1	1	21	554	574	UCGGACCAGGCUUCAUUCCUC	::.:::::::::::::::.	CUGGGAUGAAGCCUGGUCCGG	Cleavage	locus=Chr06:9819103:9829000:+	1
aqc-miR166a	CP_A09g00712	1	-1	1	21	539	559	UCGGACCAGGCUUCAUUCCUC	::.:::::::::::::::.	UUGGGAUGAAGCCUGGUCCGG	Cleavage	locus=Chr09:8933869:8939115:+	1
aqc-miR166a	CP_B22g00189	1	-1	1	21	539	559	UCGGACCAGGCUUCAUUCCUC	::.:::::::::::::::.	UUGGGAUGAAGCCUGGUCCGG	Cleavage	locus=Chr22:2826280:2831512:+	1
aqc-miR166a	CP_A06g00792	1	-1	1	21	554	574	UCGGACCAGGCUUCAUUCCUC	::.:::::::::::::::.	CUGGGAUGAAGCCUGGUCCGG	Cleavage	locus=Chr06:9760801:9778666:+	1
aqc-miR166a	CP_B18g02110	1	-1	1	21	410	430	UCGGACCAGGCUUCAUUCCUC	::.:::::::::::::::.	CCGGGAUGAAGCCUGGUCCGG	Cleavage	locus=Chr18:32796467:32804508:-	1
aqc-miR166b	CP_A06g00796	1	-1	1	21	554	574	UCGGACCAGGCUUCAUUCCCC	::.:::::::::::::::.	CUGGGAUGAAGCCUGGUCCGG	Cleavage	locus=Chr06:9819103:9829000:+	1
aqc-miR166b	CP_B18g01039	1	-1	1	21	554	574	UCGGACCAGGCUUCAUUCCCC	::.:::::::::::::::.	CUGGGAUGAAGCCUGGUCCGG	Cleavage	locus=Chr18:19637893:19644842:-	1
aqc-miR166b	CP_A07g00847	1	-1	1	21	554	574	UCGGACCAGGCUUCAUUCCCC	::.:::::::::::::::.	CUGGGAUGAAGCCUGGUCCGG	Cleavage	locus=Chr07:14812677:14820385:+	1
aqc-miR166b	CP_B20g00613	1	-1	1	21	554	574	UCGGACCAGGCUUCAUUCCCC	::.:::::::::::::::.	CUGGGAUGAAGCCUGGUCCGG	Cleavage	locus=Chr20:8204475:8211842:-	1
aqc-miR166b	CP_A09g00712	1	-1	1	21	539	559	UCGGACCAGGCUUCAUUCCCC	::.:::::::::::::::.	UUGGGAUGAAGCCUGGUCCGG	Cleavage	locus=Chr09:8933869:8939115:+	1
aqc-miR166b	CP_B22g00189	1	-1	1	21	539	559	UCGGACCAGGCUUCAUUCCCC	::.:::::::::::::::.	UUGGGAUGAAGCCUGGUCCGG	Cleavage	locus=Chr22:2826280:2831512:+	1
aqc-miR166b	CP_A06g00792	1	-1	1	21	554	574	UCGGACCAGGCUUCAUUCCCC	::.:::::::::::::::.	CUGGGAUGAAGCCUGGUCCGG	Cleavage	locus=Chr06:9760801:9778666:+	1
aqc-miR166b	CP_B18g02110	1	-1	1	21	410	430	UCGGACCAGGCUUCAUUCCCC	::.:::::::::::::::.	CCGGGAUGAAGCCUGGUCCGG	Cleavage	locus=Chr18:32796467:32804508:-	1
aqc-miR166c	CP_B22g00189	1	-1	1	20	540	559	UCGGACCAGGCUUCAUUCCU	::.:::::::::::::::.	UGGGAUGAAGCCUGGUCCGG	Cleavage	locus=Chr22:2826280:2831512:+	1
aqc-miR166c	CP_A09g00712	1	-1	1	20	540	559	UCGGACCAGGCUUCAUUCCU	::.:::::::::::::::.	UGGGAUGAAGCCUGGUCCGG	Cleavage	locus=Chr09:8933869:8939115:+	1
aqc-miR166c	CP_B18g02110	1	-1	1	20	411	430	UCGGACCAGGCUUCAUUCCU	::.:::::::::::::::.	CGGGAUGAAGCCUGGUCCGG	Cleavage	locus=Chr18:32796467:32804508:-	1
aqc-miR166c	CP_A06g00796	1	-1	1	20	555	574	UCGGACCAGGCUUCAUUCCU	::.:::::::::::::::.	UGGGAUGAAGCCUGGUCCGG	Cleavage	locus=Chr06:9819103:9829000:+	1
aqc-miR166c	CP_B18g01039	1	-1	1	20	555	574	UCGGACCAGGCUUCAUUCCU	::.:::::::::::::::.	UGGGAUGAAGCCUGGUCCGG	Cleavage	locus=Chr18:19637893:19644842:-	1
aqc-miR166c	CP_A07g00847	1	-1	1	20	555	574	UCGGACCAGGCUUCAUUCCU	::.:::::::::::::::.	UGGGAUGAAGCCUGGUCCGG	Cleavage	locus=Chr07:14812677:14820385:+	1
aqc-miR166c	CP_B20g00613	1	-1	1	20	555	574	UCGGACCAGGCUUCAUUCCU	::.:::::::::::::::.	UGGGAUGAAGCCUGGUCCGG	Cleavage	locus=Chr20:8204475:8211842:-	1
aqc-miR166c	CP_A06g00792	1	-1	1	20	555	574	UCGGACCAGGCUUCAUUCCU	::.:::::::::::::::.	UGGGAUGAAGCCUGGUCCGG	Cleavage	locus=Chr06:9760801:9778666:+	1
aqc-miR166d	CP_A06g00796	1	-1	1	21	554	574	UCGGACCAGGCUUCAUUCCUC	::.:::::::::::::::.	CUGGGAUGAAGCCUGGUCCGG	Cleavage	locus=Chr06:9819103:9829000:+	1
aqc-miR166d	CP_B18g01039	1	-1	1	21	554	574	UCGGACCAGGCUUCAUUCCUC	::.:::::::::::::::.	CUGGGAUGAAGCCUGGUCCGG	Cleavage	locus=Chr18:19637893:19644842:-	1
aqc-miR166d	CP_A07g00847	1	-1	1	21	554	574	UCGGACCAGGCUUCAUUCCUC	::.:::::::::::::::.	CUGGGAUGAAGCCUGGUCCGG	Cleavage	locus=Chr07:14812677:14820385:+	1
aqc-miR166d	CP_B20g00613	1	-1	1	21	554	574	UCGGACCAGGCUUCAUUCCUC	::.:::::::::::::::.	CUGGGAUGAAGCCUGGUCCGG	Cleavage	locus=Chr20:8204475:8211842:-	1
aqc-miR166d	CP_A06g00792	1	-1	1	21	554	574	UCGGACCAGGCUUCAUUCCUC	::.:::::::::::::::.	CUGGGAUGAAGCCUGGUCCGG	Cleavage	locus=Chr06:9760801:9778666:+	1
aqc-miR166d	CP_B18g02110	1	-1	1	21	410	430	UCGGACCAGGCUUCAUUCCUC	::.:::::::::::::::.	CCGGGAUGAAGCCUGGUCCGG	Cleavage	locus=Chr18:32796467:32804508:-	1
aqc-miR166d	CP_A09g00712	1	-1	1	21	539	559	UCGGACCAGGCUUCAUUCCUC	::.:::::::::::::::.	UUGGGAUGAAGCCUGGUCCGG	Cleavage	locus=Chr09:8933869:8939115:+	1
aqc-miR166d	CP_B22g00189	1	-1	1	21	539	559	UCGGACCAGGCUUCAUUCCUC	::.:::::::::::::::.	UUGGGAUGAAGCCUGGUCCGG	Cleavage	locus=Chr22:2826280:2831512:+	1
aqc-miR166e	CP_A06g00796	1	-1	1	21	554	574	UCGGACCAGGCUUCAUUCCCC	::.:::::::::::::::.	CUGGGAUGAAGCCUGGUCCGG	Cleavage	locus=Chr06:9819103:9829000:+	1
aqc-miR166e	CP_B18g02110	1	-1	1	21	410	430	UCGGACCAGGCUUCAUUCCCC	::.:::::::::::::::.	CCGGGAUGAAGCCUGGUCCGG	Cleavage	locus=Chr18:32796467:32804508:-	1
aqc-miR166e	CP_B18g01039	1	-1	1	21	554	574	UCGGACCAGGCUUCAUUCCCC	::.:::::::::::::::.	CUGGGAUGAAGCCUGGUCCGG	Cleavage	locus=Chr18:19637893:19644842:-	1
aqc-miR166e	CP_A07g00847	1	-1	1	21	554	574	UCGGACCAGGCUUCAUUCCCC	::.:::::::::::::::.	CUGGGAUGAAGCCUGGUCCGG	Cleavage	locus=Chr07:14812677:14820385:+	1
aqc-miR166e	CP_B20g00613	1	-1	1	21	554	574	UCGGACCAGGCUUCAUUCCCC	::.:::::::::::::::.	CUGGGAUGAAGCCUGGUCCGG	Cleavage	locus=Chr20:8204475:8211842:-	1
aqc-miR166e	CP_A06g00792	1	-1	1	21	554	574	UCGGACCAGGCUUCAUUCCCC	::.:::::::::::::::.	CUGGGAUGAAGCCUGGUCCGG	Cleavage	locus=Chr06:9760801:9778666:+	1
aqc-miR166e	CP_A09g00712	1	-1	1	21	539	559	UCGGACCAGGCUUCAUUCCCC	::.:::::::::::::::.	UUGGGAUGAAGCCUGGUCCGG	Cleavage	locus=Chr09:8933869:8939115:+	1
aqc-miR166e	CP_B22g00189	1	-1	1	21	539	559	UCGGACCAGGCUUCAUUCCCC	::.:::::::::::::::.	UUGGGAUGAAGCCUGGUCCGG	Cleavage	locus=Chr22:2826280:2831512:+	1
ata-miR166a-3p	CP_B22g00189	1	-1	1	21	539	559	UCGGACCAGGCUUCAUUCCCC	::.:::::::::::::::.	UUGGGAUGAAGCCUGGUCCGG	Cleavage	locus=Chr22:2826280:2831512:+	1
ata-miR166a-3p	CP_A09g00712	1	-1	1	21	539	559	UCGGACCAGGCUUCAUUCCCC	::.:::::::::::::::.	UUGGGAUGAAGCCUGGUCCGG	Cleavage	locus=Chr09:8933869:8939115:+	1
ata-miR166a-3p	CP_B18g02110	1	-1	1	21	410	430	UCGGACCAGGCUUCAUUCCCC	::.:::::::::::::::.	CCGGGAUGAAGCCUGGUCCGG	Cleavage	locus=Chr18:32796467:32804508:-	1
ata-miR166a-3p	CP_A06g00796	1	-1	1	21	554	574	UCGGACCAGGCUUCAUUCCCC	::.:::::::::::::::.	CUGGGAUGAAGCCUGGUCCGG	Cleavage	locus=Chr06:9819103:9829000:+	1
ata-miR166a-3p	CP_B18g01039	1	-1	1	21	554	574	UCGGACCAGGCUUCAUUCCCC	::.:::::::::::::::.	CUGGGAUGAAGCCUGGUCCGG	Cleavage	locus=Chr18:19637893:19644842:-	1
ata-miR166a-3p	CP_A07g00847	1	-1	1	21	554	574	UCGGACCAGGCUUCAUUCCCC	::.:::::::::::::::.	CUGGGAUGAAGCCUGGUCCGG	Cleavage	locus=Chr07:14812677:14820385:+	1
ata-miR166a-3p	CP_B20g00613	1	-1	1	21	554	574	UCGGACCAGGCUUCAUUCCCC	::.:::::::::::::::.	CUGGGAUGAAGCCUGGUCCGG	Cleavage	locus=Chr20:8204475:8211842:-	1
ata-miR166a-3p	CP_A06g00792	1	-1	1	21	554	574	UCGGACCAGGCUUCAUUCCCC	::.:::::::::::::::.	CUGGGAUGAAGCCUGGUCCGG	Cleavage	locus=Chr06:9760801:9778666:+	1
ata-miR166b-3p	CP_A06g00792	1	-1	1	21	554	574	UCGGACCAGGCUUCAUUCCCC	::.:::::::::::::::.	CUGGGAUGAAGCCUGGUCCGG	Cleavage	locus=Chr06:9760801:9778666:+	1
ata-miR166b-3p	CP_B18g02110	1	-1	1	21	410	430	UCGGACCAGGCUUCAUUCCCC	::.:::::::::::::::.	CCGGGAUGAAGCCUGGUCCGG	Cleavage	locus=Chr18:32796467:32804508:-	1
ata-miR166b-3p	CP_B18g01039	1	-1	1	21	554	574	UCGGACCAGGCUUCAUUCCCC	::.:::::::::::::::.	CUGGGAUGAAGCCUGGUCCGG	Cleavage	locus=Chr18:19637893:19644842:-	1
ata-miR166b-3p	CP_A07g00847	1	-1	1	21	554	574	UCGGACCAGGCUUCAUUCCCC	::.:::::::::::::::.	CUGGGAUGAAGCCUGGUCCGG	Cleavage	locus=Chr07:14812677:14820385:+	1
ata-miR166b-3p	CP_B20g00613	1	-1	1	21	554	574	UCGGACCAGGCUUCAUUCCCC	::.:::::::::::::::.	CUGGGAUGAAGCCUGGUCCGG	Cleavage	locus=Chr20:8204475:8211842:-	1
ata-miR166b-3p	CP_A09g00712	1	-1	1	21	539	559	UCGGACCAGGCUUCAUUCCCC	::.:::::::::::::::.	UUGGGAUGAAGCCUGGUCCGG	Cleavage	locus=Chr09:8933869:8939115:+	1
ata-miR166b-3p	CP_B22g00189	1	-1	1	21	539	559	UCGGACCAGGCUUCAUUCCCC	::.:::::::::::::::.	UUGGGAUGAAGCCUGGUCCGG	Cleavage	locus=Chr22:2826280:2831512:+	1
ata-miR166b-3p	CP_A06g00796	1	-1	1	21	554	574	UCGGACCAGGCUUCAUUCCCC	::.:::::::::::::::.	CUGGGAUGAAGCCUGGUCCGG	Cleavage	locus=Chr06:9819103:9829000:+	1
ata-miR166c-3p	CP_A06g00796	1	-1	1	21	554	574	UCGGACCAGGCUUCAUUCCUU	::.:::::::::::::::.	CUGGGAUGAAGCCUGGUCCGG	Cleavage	locus=Chr06:9819103:9829000:+	1
ata-miR166c-3p	CP_B18g02110	1	-1	1	21	410	430	UCGGACCAGGCUUCAUUCCUU	::.:::::::::::::::.	CCGGGAUGAAGCCUGGUCCGG	Cleavage	locus=Chr18:32796467:32804508:-	1
ata-miR166c-3p	CP_A09g00712	1	-1	1	21	539	559	UCGGACCAGGCUUCAUUCCUU	::.:::::::::::::::.	UUGGGAUGAAGCCUGGUCCGG	Cleavage	locus=Chr09:8933869:8939115:+	1
ata-miR166c-3p	CP_B22g00189	1	-1	1	21	539	559	UCGGACCAGGCUUCAUUCCUU	::.:::::::::::::::.	UUGGGAUGAAGCCUGGUCCGG	Cleavage	locus=Chr22:2826280:2831512:+	1
ata-miR166c-3p	CP_B18g01039	1	-1	1	21	554	574	UCGGACCAGGCUUCAUUCCUU	::.:::::::::::::::.	CUGGGAUGAAGCCUGGUCCGG	Cleavage	locus=Chr18:19637893:19644842:-	1
ata-miR166c-3p	CP_A07g00847	1	-1	1	21	554	574	UCGGACCAGGCUUCAUUCCUU	::.:::::::::::::::.	CUGGGAUGAAGCCUGGUCCGG	Cleavage	locus=Chr07:14812677:14820385:+	1
ata-miR166c-3p	CP_B20g00613	1	-1	1	21	554	574	UCGGACCAGGCUUCAUUCCUU	::.:::::::::::::::.	CUGGGAUGAAGCCUGGUCCGG	Cleavage	locus=Chr20:8204475:8211842:-	1
ata-miR166c-3p	CP_A06g00792	1	-1	1	21	554	574	UCGGACCAGGCUUCAUUCCUU	::.:::::::::::::::.	CUGGGAUGAAGCCUGGUCCGG	Cleavage	locus=Chr06:9760801:9778666:+	1
ata-miR166d-3p	CP_B18g02110	1	-1	1	21	410	430	UCGGACCAGGCUUCAUUCCCC	::.:::::::::::::::.	CCGGGAUGAAGCCUGGUCCGG	Cleavage	locus=Chr18:32796467:32804508:-	1
ata-miR166d-3p	CP_A07g00847	1	-1	1	21	554	574	UCGGACCAGGCUUCAUUCCCC	::.:::::::::::::::.	CUGGGAUGAAGCCUGGUCCGG	Cleavage	locus=Chr07:14812677:14820385:+	1
ata-miR166d-3p	CP_B18g01039	1	-1	1	21	554	574	UCGGACCAGGCUUCAUUCCCC	::.:::::::::::::::.	CUGGGAUGAAGCCUGGUCCGG	Cleavage	locus=Chr18:19637893:19644842:-	1
ata-miR166d-3p	CP_B20g00613	1	-1	1	21	554	574	UCGGACCAGGCUUCAUUCCCC	::.:::::::::::::::.	CUGGGAUGAAGCCUGGUCCGG	Cleavage	locus=Chr20:8204475:8211842:-	1
ata-miR166d-3p	CP_B22g00189	1	-1	1	21	539	559	UCGGACCAGGCUUCAUUCCCC	::.:::::::::::::::.	UUGGGAUGAAGCCUGGUCCGG	Cleavage	locus=Chr22:2826280:2831512:+	1
ata-miR166d-3p	CP_A09g00712	1	-1	1	21	539	559	UCGGACCAGGCUUCAUUCCCC	::.:::::::::::::::.	UUGGGAUGAAGCCUGGUCCGG	Cleavage	locus=Chr09:8933869:8939115:+	1
ata-miR166d-3p	CP_A06g00792	1	-1	1	21	554	574	UCGGACCAGGCUUCAUUCCCC	::.:::::::::::::::.	CUGGGAUGAAGCCUGGUCCGG	Cleavage	locus=Chr06:9760801:9778666:+	1
ata-miR166d-3p	CP_A06g00796	1	-1	1	21	554	574	UCGGACCAGGCUUCAUUCCCC	::.:::::::::::::::.	CUGGGAUGAAGCCUGGUCCGG	Cleavage	locus=Chr06:9819103:9829000:+	1
ata-miR166e-3p	CP_B22g00189	1	-1	1	21	539	559	UCGGACCAGGCUUCAUUCCCC	::.:::::::::::::::.	UUGGGAUGAAGCCUGGUCCGG	Cleavage	locus=Chr22:2826280:2831512:+	1
ata-miR166e-3p	CP_A09g00712	1	-1	1	21	539	559	UCGGACCAGGCUUCAUUCCCC	::.:::::::::::::::.	UUGGGAUGAAGCCUGGUCCGG	Cleavage	locus=Chr09:8933869:8939115:+	1
ata-miR166e-3p	CP_A06g00792	1	-1	1	21	554	574	UCGGACCAGGCUUCAUUCCCC	::.:::::::::::::::.	CUGGGAUGAAGCCUGGUCCGG	Cleavage	locus=Chr06:9760801:9778666:+	1
ata-miR166e-3p	CP_A06g00796	1	-1	1	21	554	574	UCGGACCAGGCUUCAUUCCCC	::.:::::::::::::::.	CUGGGAUGAAGCCUGGUCCGG	Cleavage	locus=Chr06:9819103:9829000:+	1
ata-miR166e-3p	CP_B18g01039	1	-1	1	21	554	574	UCGGACCAGGCUUCAUUCCCC	::.:::::::::::::::.	CUGGGAUGAAGCCUGGUCCGG	Cleavage	locus=Chr18:19637893:19644842:-	1
ata-miR166e-3p	CP_B20g00613	1	-1	1	21	554	574	UCGGACCAGGCUUCAUUCCCC	::.:::::::::::::::.	CUGGGAUGAAGCCUGGUCCGG	Cleavage	locus=Chr20:8204475:8211842:-	1
ata-miR166e-3p	CP_A07g00847	1	-1	1	21	554	574	UCGGACCAGGCUUCAUUCCCC	::.:::::::::::::::.	CUGGGAUGAAGCCUGGUCCGG	Cleavage	locus=Chr07:14812677:14820385:+	1
ata-miR166e-3p	CP_B18g02110	1	-1	1	21	410	430	UCGGACCAGGCUUCAUUCCCC	::.:::::::::::::::.	CCGGGAUGAAGCCUGGUCCGG	Cleavage	locus=Chr18:32796467:32804508:-	1
ath-miR166a-3p	CP_B18g02110	1	-1	1	21	410	430	UCGGACCAGGCUUCAUUCCCC	::.:::::::::::::::.	CCGGGAUGAAGCCUGGUCCGG	Cleavage	locus=Chr18:32796467:32804508:-	1
ath-miR166a-3p	CP_A07g00847	1	-1	1	21	554	574	UCGGACCAGGCUUCAUUCCCC	::.:::::::::::::::.	CUGGGAUGAAGCCUGGUCCGG	Cleavage	locus=Chr07:14812677:14820385:+	1
ath-miR166a-3p	CP_B18g01039	1	-1	1	21	554	574	UCGGACCAGGCUUCAUUCCCC	::.:::::::::::::::.	CUGGGAUGAAGCCUGGUCCGG	Cleavage	locus=Chr18:19637893:19644842:-	1
ath-miR166a-3p	CP_B20g00613	1	-1	1	21	554	574	UCGGACCAGGCUUCAUUCCCC	::.:::::::::::::::.	CUGGGAUGAAGCCUGGUCCGG	Cleavage	locus=Chr20:8204475:8211842:-	1
ath-miR166a-3p	CP_B22g00189	1	-1	1	21	539	559	UCGGACCAGGCUUCAUUCCCC	::.:::::::::::::::.	UUGGGAUGAAGCCUGGUCCGG	Cleavage	locus=Chr22:2826280:2831512:+	1
ath-miR166a-3p	CP_A09g00712	1	-1	1	21	539	559	UCGGACCAGGCUUCAUUCCCC	::.:::::::::::::::.	UUGGGAUGAAGCCUGGUCCGG	Cleavage	locus=Chr09:8933869:8939115:+	1
ath-miR166a-3p	CP_A06g00792	1	-1	1	21	554	574	UCGGACCAGGCUUCAUUCCCC	::.:::::::::::::::.	CUGGGAUGAAGCCUGGUCCGG	Cleavage	locus=Chr06:9760801:9778666:+	1
ath-miR166a-3p	CP_A06g00796	1	-1	1	21	554	574	UCGGACCAGGCUUCAUUCCCC	::.:::::::::::::::.	CUGGGAUGAAGCCUGGUCCGG	Cleavage	locus=Chr06:9819103:9829000:+	1
ath-miR166b-3p	CP_A06g00792	1	-1	1	21	554	574	UCGGACCAGGCUUCAUUCCCC	::.:::::::::::::::.	CUGGGAUGAAGCCUGGUCCGG	Cleavage	locus=Chr06:9760801:9778666:+	1
ath-miR166b-3p	CP_B18g01039	1	-1	1	21	554	574	UCGGACCAGGCUUCAUUCCCC	::.:::::::::::::::.	CUGGGAUGAAGCCUGGUCCGG	Cleavage	locus=Chr18:19637893:19644842:-	1
ath-miR166b-3p	CP_A07g00847	1	-1	1	21	554	574	UCGGACCAGGCUUCAUUCCCC	::.:::::::::::::::.	CUGGGAUGAAGCCUGGUCCGG	Cleavage	locus=Chr07:14812677:14820385:+	1
ath-miR166b-3p	CP_B20g00613	1	-1	1	21	554	574	UCGGACCAGGCUUCAUUCCCC	::.:::::::::::::::.	CUGGGAUGAAGCCUGGUCCGG	Cleavage	locus=Chr20:8204475:8211842:-	1
ath-miR166b-3p	CP_A06g00796	1	-1	1	21	554	574	UCGGACCAGGCUUCAUUCCCC	::.:::::::::::::::.	CUGGGAUGAAGCCUGGUCCGG	Cleavage	locus=Chr06:9819103:9829000:+	1
ath-miR166b-3p	CP_B18g02110	1	-1	1	21	410	430	UCGGACCAGGCUUCAUUCCCC	::.:::::::::::::::.	CCGGGAUGAAGCCUGGUCCGG	Cleavage	locus=Chr18:32796467:32804508:-	1
ath-miR166b-3p	CP_A09g00712	1	-1	1	21	539	559	UCGGACCAGGCUUCAUUCCCC	::.:::::::::::::::.	UUGGGAUGAAGCCUGGUCCGG	Cleavage	locus=Chr09:8933869:8939115:+	1
ath-miR166b-3p	CP_B22g00189	1	-1	1	21	539	559	UCGGACCAGGCUUCAUUCCCC	::.:::::::::::::::.	UUGGGAUGAAGCCUGGUCCGG	Cleavage	locus=Chr22:2826280:2831512:+	1
ath-miR166c	CP_A06g00792	1	-1	1	21	554	574	UCGGACCAGGCUUCAUUCCCC	::.:::::::::::::::.	CUGGGAUGAAGCCUGGUCCGG	Cleavage	locus=Chr06:9760801:9778666:+	1
ath-miR166c	CP_A06g00796	1	-1	1	21	554	574	UCGGACCAGGCUUCAUUCCCC	::.:::::::::::::::.	CUGGGAUGAAGCCUGGUCCGG	Cleavage	locus=Chr06:9819103:9829000:+	1
ath-miR166c	CP_B18g02110	1	-1	1	21	410	430	UCGGACCAGGCUUCAUUCCCC	::.:::::::::::::::.	CCGGGAUGAAGCCUGGUCCGG	Cleavage	locus=Chr18:32796467:32804508:-	1
ath-miR166c	CP_B18g01039	1	-1	1	21	554	574	UCGGACCAGGCUUCAUUCCCC	::.:::::::::::::::.	CUGGGAUGAAGCCUGGUCCGG	Cleavage	locus=Chr18:19637893:19644842:-	1
ath-miR166c	CP_B20g00613	1	-1	1	21	554	574	UCGGACCAGGCUUCAUUCCCC	::.:::::::::::::::.	CUGGGAUGAAGCCUGGUCCGG	Cleavage	locus=Chr20:8204475:8211842:-	1
ath-miR166c	CP_A07g00847	1	-1	1	21	554	574	UCGGACCAGGCUUCAUUCCCC	::.:::::::::::::::.	CUGGGAUGAAGCCUGGUCCGG	Cleavage	locus=Chr07:14812677:14820385:+	1
ath-miR166c	CP_A09g00712	1	-1	1	21	539	559	UCGGACCAGGCUUCAUUCCCC	::.:::::::::::::::.	UUGGGAUGAAGCCUGGUCCGG	Cleavage	locus=Chr09:8933869:8939115:+	1
ath-miR166c	CP_B22g00189	1	-1	1	21	539	559	UCGGACCAGGCUUCAUUCCCC	::.:::::::::::::::.	UUGGGAUGAAGCCUGGUCCGG	Cleavage	locus=Chr22:2826280:2831512:+	1
ath-miR166d	CP_A07g00847	1	-1	1	21	554	574	UCGGACCAGGCUUCAUUCCCC	::.:::::::::::::::.	CUGGGAUGAAGCCUGGUCCGG	Cleavage	locus=Chr07:14812677:14820385:+	1
ath-miR166d	CP_B18g01039	1	-1	1	21	554	574	UCGGACCAGGCUUCAUUCCCC	::.:::::::::::::::.	CUGGGAUGAAGCCUGGUCCGG	Cleavage	locus=Chr18:19637893:19644842:-	1
ath-miR166d	CP_B20g00613	1	-1	1	21	554	574	UCGGACCAGGCUUCAUUCCCC	::.:::::::::::::::.	CUGGGAUGAAGCCUGGUCCGG	Cleavage	locus=Chr20:8204475:8211842:-	1
ath-miR166d	CP_A06g00796	1	-1	1	21	554	574	UCGGACCAGGCUUCAUUCCCC	::.:::::::::::::::.	CUGGGAUGAAGCCUGGUCCGG	Cleavage	locus=Chr06:9819103:9829000:+	1
ath-miR166d	CP_A09g00712	1	-1	1	21	539	559	UCGGACCAGGCUUCAUUCCCC	::.:::::::::::::::.	UUGGGAUGAAGCCUGGUCCGG	Cleavage	locus=Chr09:8933869:8939115:+	1
ath-miR166d	CP_B22g00189	1	-1	1	21	539	559	UCGGACCAGGCUUCAUUCCCC	::.:::::::::::::::.	UUGGGAUGAAGCCUGGUCCGG	Cleavage	locus=Chr22:2826280:2831512:+	1
ath-miR166d	CP_A06g00792	1	-1	1	21	554	574	UCGGACCAGGCUUCAUUCCCC	::.:::::::::::::::.	CUGGGAUGAAGCCUGGUCCGG	Cleavage	locus=Chr06:9760801:9778666:+	1
ath-miR166d	CP_B18g02110	1	-1	1	21	410	430	UCGGACCAGGCUUCAUUCCCC	::.:::::::::::::::.	CCGGGAUGAAGCCUGGUCCGG	Cleavage	locus=Chr18:32796467:32804508:-	1
ath-miR166e-3p	CP_B22g00189	1	-1	1	21	539	559	UCGGACCAGGCUUCAUUCCCC	::.:::::::::::::::.	UUGGGAUGAAGCCUGGUCCGG	Cleavage	locus=Chr22:2826280:2831512:+	1
ath-miR166e-3p	CP_A09g00712	1	-1	1	21	539	559	UCGGACCAGGCUUCAUUCCCC	::.:::::::::::::::.	UUGGGAUGAAGCCUGGUCCGG	Cleavage	locus=Chr09:8933869:8939115:+	1
ath-miR166e-3p	CP_A06g00792	1	-1	1	21	554	574	UCGGACCAGGCUUCAUUCCCC	::.:::::::::::::::.	CUGGGAUGAAGCCUGGUCCGG	Cleavage	locus=Chr06:9760801:9778666:+	1
ath-miR166e-3p	CP_A06g00796	1	-1	1	21	554	574	UCGGACCAGGCUUCAUUCCCC	::.:::::::::::::::.	CUGGGAUGAAGCCUGGUCCGG	Cleavage	locus=Chr06:9819103:9829000:+	1
ath-miR166e-3p	CP_B18g02110	1	-1	1	21	410	430	UCGGACCAGGCUUCAUUCCCC	::.:::::::::::::::.	CCGGGAUGAAGCCUGGUCCGG	Cleavage	locus=Chr18:32796467:32804508:-	1
ath-miR166e-3p	CP_B18g01039	1	-1	1	21	554	574	UCGGACCAGGCUUCAUUCCCC	::.:::::::::::::::.	CUGGGAUGAAGCCUGGUCCGG	Cleavage	locus=Chr18:19637893:19644842:-	1
ath-miR166e-3p	CP_B20g00613	1	-1	1	21	554	574	UCGGACCAGGCUUCAUUCCCC	::.:::::::::::::::.	CUGGGAUGAAGCCUGGUCCGG	Cleavage	locus=Chr20:8204475:8211842:-	1
ath-miR166e-3p	CP_A07g00847	1	-1	1	21	554	574	UCGGACCAGGCUUCAUUCCCC	::.:::::::::::::::.	CUGGGAUGAAGCCUGGUCCGG	Cleavage	locus=Chr07:14812677:14820385:+	1
ath-miR166f	CP_B18g02110	1	-1	1	21	410	430	UCGGACCAGGCUUCAUUCCCC	::.:::::::::::::::.	CCGGGAUGAAGCCUGGUCCGG	Cleavage	locus=Chr18:32796467:32804508:-	1
ath-miR166f	CP_A06g00796	1	-1	1	21	554	574	UCGGACCAGGCUUCAUUCCCC	::.:::::::::::::::.	CUGGGAUGAAGCCUGGUCCGG	Cleavage	locus=Chr06:9819103:9829000:+	1
ath-miR166f	CP_B18g01039	1	-1	1	21	554	574	UCGGACCAGGCUUCAUUCCCC	::.:::::::::::::::.	CUGGGAUGAAGCCUGGUCCGG	Cleavage	locus=Chr18:19637893:19644842:-	1
ath-miR166f	CP_A07g00847	1	-1	1	21	554	574	UCGGACCAGGCUUCAUUCCCC	::.:::::::::::::::.	CUGGGAUGAAGCCUGGUCCGG	Cleavage	locus=Chr07:14812677:14820385:+	1
ath-miR166f	CP_B20g00613	1	-1	1	21	554	574	UCGGACCAGGCUUCAUUCCCC	::.:::::::::::::::.	CUGGGAUGAAGCCUGGUCCGG	Cleavage	locus=Chr20:8204475:8211842:-	1
ath-miR166f	CP_A09g00712	1	-1	1	21	539	559	UCGGACCAGGCUUCAUUCCCC	::.:::::::::::::::.	UUGGGAUGAAGCCUGGUCCGG	Cleavage	locus=Chr09:8933869:8939115:+	1
ath-miR166f	CP_A06g00792	1	-1	1	21	554	574	UCGGACCAGGCUUCAUUCCCC	::.:::::::::::::::.	CUGGGAUGAAGCCUGGUCCGG	Cleavage	locus=Chr06:9760801:9778666:+	1
ath-miR166f	CP_B22g00189	1	-1	1	21	539	559	UCGGACCAGGCUUCAUUCCCC	::.:::::::::::::::.	UUGGGAUGAAGCCUGGUCCGG	Cleavage	locus=Chr22:2826280:2831512:+	1
ath-miR166g	CP_A07g00847	1	-1	1	21	554	574	UCGGACCAGGCUUCAUUCCCC	::.:::::::::::::::.	CUGGGAUGAAGCCUGGUCCGG	Cleavage	locus=Chr07:14812677:14820385:+	1
ath-miR166g	CP_B18g01039	1	-1	1	21	554	574	UCGGACCAGGCUUCAUUCCCC	::.:::::::::::::::.	CUGGGAUGAAGCCUGGUCCGG	Cleavage	locus=Chr18:19637893:19644842:-	1
ath-miR166g	CP_B20g00613	1	-1	1	21	554	574	UCGGACCAGGCUUCAUUCCCC	::.:::::::::::::::.	CUGGGAUGAAGCCUGGUCCGG	Cleavage	locus=Chr20:8204475:8211842:-	1
ath-miR166g	CP_A06g00792	1	-1	1	21	554	574	UCGGACCAGGCUUCAUUCCCC	::.:::::::::::::::.	CUGGGAUGAAGCCUGGUCCGG	Cleavage	locus=Chr06:9760801:9778666:+	1
ath-miR166g	CP_B18g02110	1	-1	1	21	410	430	UCGGACCAGGCUUCAUUCCCC	::.:::::::::::::::.	CCGGGAUGAAGCCUGGUCCGG	Cleavage	locus=Chr18:32796467:32804508:-	1
ath-miR166g	CP_A09g00712	1	-1	1	21	539	559	UCGGACCAGGCUUCAUUCCCC	::.:::::::::::::::.	UUGGGAUGAAGCCUGGUCCGG	Cleavage	locus=Chr09:8933869:8939115:+	1
ath-miR166g	CP_B22g00189	1	-1	1	21	539	559	UCGGACCAGGCUUCAUUCCCC	::.:::::::::::::::.	UUGGGAUGAAGCCUGGUCCGG	Cleavage	locus=Chr22:2826280:2831512:+	1
ath-miR166g	CP_A06g00796	1	-1	1	21	554	574	UCGGACCAGGCUUCAUUCCCC	::.:::::::::::::::.	CUGGGAUGAAGCCUGGUCCGG	Cleavage	locus=Chr06:9819103:9829000:+	1
bdi-miR166a-3p	CP_B18g02110	1	-1	1	21	410	430	UCGGACCAGGCUUCAUUCCCC	::.:::::::::::::::.	CCGGGAUGAAGCCUGGUCCGG	Cleavage	locus=Chr18:32796467:32804508:-	1
bdi-miR166a-3p	CP_A06g00796	1	-1	1	21	554	574	UCGGACCAGGCUUCAUUCCCC	::.:::::::::::::::.	CUGGGAUGAAGCCUGGUCCGG	Cleavage	locus=Chr06:9819103:9829000:+	1
bdi-miR166a-3p	CP_B18g01039	1	-1	1	21	554	574	UCGGACCAGGCUUCAUUCCCC	::.:::::::::::::::.	CUGGGAUGAAGCCUGGUCCGG	Cleavage	locus=Chr18:19637893:19644842:-	1
bdi-miR166a-3p	CP_A07g00847	1	-1	1	21	554	574	UCGGACCAGGCUUCAUUCCCC	::.:::::::::::::::.	CUGGGAUGAAGCCUGGUCCGG	Cleavage	locus=Chr07:14812677:14820385:+	1
bdi-miR166a-3p	CP_B20g00613	1	-1	1	21	554	574	UCGGACCAGGCUUCAUUCCCC	::.:::::::::::::::.	CUGGGAUGAAGCCUGGUCCGG	Cleavage	locus=Chr20:8204475:8211842:-	1
bdi-miR166a-3p	CP_A06g00792	1	-1	1	21	554	574	UCGGACCAGGCUUCAUUCCCC	::.:::::::::::::::.	CUGGGAUGAAGCCUGGUCCGG	Cleavage	locus=Chr06:9760801:9778666:+	1
bdi-miR166a-3p	CP_A09g00712	1	-1	1	21	539	559	UCGGACCAGGCUUCAUUCCCC	::.:::::::::::::::.	UUGGGAUGAAGCCUGGUCCGG	Cleavage	locus=Chr09:8933869:8939115:+	1
bdi-miR166a-3p	CP_B22g00189	1	-1	1	21	539	559	UCGGACCAGGCUUCAUUCCCC	::.:::::::::::::::.	UUGGGAUGAAGCCUGGUCCGG	Cleavage	locus=Chr22:2826280:2831512:+	1
bdi-miR166b-3p	CP_A06g00792	1	-1	1	21	554	574	UCGGACCAGGCUUCAUUCCCC	::.:::::::::::::::.	CUGGGAUGAAGCCUGGUCCGG	Cleavage	locus=Chr06:9760801:9778666:+	1
bdi-miR166b-3p	CP_B18g02110	1	-1	1	21	410	430	UCGGACCAGGCUUCAUUCCCC	::.:::::::::::::::.	CCGGGAUGAAGCCUGGUCCGG	Cleavage	locus=Chr18:32796467:32804508:-	1
bdi-miR166b-3p	CP_B22g00189	1	-1	1	21	539	559	UCGGACCAGGCUUCAUUCCCC	::.:::::::::::::::.	UUGGGAUGAAGCCUGGUCCGG	Cleavage	locus=Chr22:2826280:2831512:+	1
bdi-miR166b-3p	CP_A09g00712	1	-1	1	21	539	559	UCGGACCAGGCUUCAUUCCCC	::.:::::::::::::::.	UUGGGAUGAAGCCUGGUCCGG	Cleavage	locus=Chr09:8933869:8939115:+	1
bdi-miR166b-3p	CP_A06g00796	1	-1	1	21	554	574	UCGGACCAGGCUUCAUUCCCC	::.:::::::::::::::.	CUGGGAUGAAGCCUGGUCCGG	Cleavage	locus=Chr06:9819103:9829000:+	1
bdi-miR166b-3p	CP_B18g01039	1	-1	1	21	554	574	UCGGACCAGGCUUCAUUCCCC	::.:::::::::::::::.	CUGGGAUGAAGCCUGGUCCGG	Cleavage	locus=Chr18:19637893:19644842:-	1
bdi-miR166b-3p	CP_B20g00613	1	-1	1	21	554	574	UCGGACCAGGCUUCAUUCCCC	::.:::::::::::::::.	CUGGGAUGAAGCCUGGUCCGG	Cleavage	locus=Chr20:8204475:8211842:-	1
bdi-miR166b-3p	CP_A07g00847	1	-1	1	21	554	574	UCGGACCAGGCUUCAUUCCCC	::.:::::::::::::::.	CUGGGAUGAAGCCUGGUCCGG	Cleavage	locus=Chr07:14812677:14820385:+	1
bdi-miR166c-3p	CP_A06g00792	1	-1	1	21	554	574	UCGGACCAGGCUUCAUUCCCC	::.:::::::::::::::.	CUGGGAUGAAGCCUGGUCCGG	Cleavage	locus=Chr06:9760801:9778666:+	1
bdi-miR166c-3p	CP_B18g02110	1	-1	1	21	410	430	UCGGACCAGGCUUCAUUCCCC	::.:::::::::::::::.	CCGGGAUGAAGCCUGGUCCGG	Cleavage	locus=Chr18:32796467:32804508:-	1
bdi-miR166c-3p	CP_B18g01039	1	-1	1	21	554	574	UCGGACCAGGCUUCAUUCCCC	::.:::::::::::::::.	CUGGGAUGAAGCCUGGUCCGG	Cleavage	locus=Chr18:19637893:19644842:-	1
bdi-miR166c-3p	CP_A07g00847	1	-1	1	21	554	574	UCGGACCAGGCUUCAUUCCCC	::.:::::::::::::::.	CUGGGAUGAAGCCUGGUCCGG	Cleavage	locus=Chr07:14812677:14820385:+	1
bdi-miR166c-3p	CP_B20g00613	1	-1	1	21	554	574	UCGGACCAGGCUUCAUUCCCC	::.:::::::::::::::.	CUGGGAUGAAGCCUGGUCCGG	Cleavage	locus=Chr20:8204475:8211842:-	1
bdi-miR166c-3p	CP_A09g00712	1	-1	1	21	539	559	UCGGACCAGGCUUCAUUCCCC	::.:::::::::::::::.	UUGGGAUGAAGCCUGGUCCGG	Cleavage	locus=Chr09:8933869:8939115:+	1
bdi-miR166c-3p	CP_B22g00189	1	-1	1	21	539	559	UCGGACCAGGCUUCAUUCCCC	::.:::::::::::::::.	UUGGGAUGAAGCCUGGUCCGG	Cleavage	locus=Chr22:2826280:2831512:+	1
bdi-miR166c-3p	CP_A06g00796	1	-1	1	21	554	574	UCGGACCAGGCUUCAUUCCCC	::.:::::::::::::::.	CUGGGAUGAAGCCUGGUCCGG	Cleavage	locus=Chr06:9819103:9829000:+	1
bdi-miR166d-3p	CP_A06g00796	1	-1	1	21	554	574	UCGGACCAGGCUUCAUUCCCC	::.:::::::::::::::.	CUGGGAUGAAGCCUGGUCCGG	Cleavage	locus=Chr06:9819103:9829000:+	1
bdi-miR166d-3p	CP_B18g02110	1	-1	1	21	410	430	UCGGACCAGGCUUCAUUCCCC	::.:::::::::::::::.	CCGGGAUGAAGCCUGGUCCGG	Cleavage	locus=Chr18:32796467:32804508:-	1
bdi-miR166d-3p	CP_B18g01039	1	-1	1	21	554	574	UCGGACCAGGCUUCAUUCCCC	::.:::::::::::::::.	CUGGGAUGAAGCCUGGUCCGG	Cleavage	locus=Chr18:19637893:19644842:-	1
bdi-miR166d-3p	CP_A07g00847	1	-1	1	21	554	574	UCGGACCAGGCUUCAUUCCCC	::.:::::::::::::::.	CUGGGAUGAAGCCUGGUCCGG	Cleavage	locus=Chr07:14812677:14820385:+	1
bdi-miR166d-3p	CP_B20g00613	1	-1	1	21	554	574	UCGGACCAGGCUUCAUUCCCC	::.:::::::::::::::.	CUGGGAUGAAGCCUGGUCCGG	Cleavage	locus=Chr20:8204475:8211842:-	1
bdi-miR166d-3p	CP_A09g00712	1	-1	1	21	539	559	UCGGACCAGGCUUCAUUCCCC	::.:::::::::::::::.	UUGGGAUGAAGCCUGGUCCGG	Cleavage	locus=Chr09:8933869:8939115:+	1
bdi-miR166d-3p	CP_B22g00189	1	-1	1	21	539	559	UCGGACCAGGCUUCAUUCCCC	::.:::::::::::::::.	UUGGGAUGAAGCCUGGUCCGG	Cleavage	locus=Chr22:2826280:2831512:+	1
bdi-miR166d-3p	CP_A06g00792	1	-1	1	21	554	574	UCGGACCAGGCUUCAUUCCCC	::.:::::::::::::::.	CUGGGAUGAAGCCUGGUCCGG	Cleavage	locus=Chr06:9760801:9778666:+	1
bdi-miR166i-3p	CP_B22g00189	1	-1	1	21	539	559	UCGGACCAGGCUUCAUUCCCC	::.:::::::::::::::.	UUGGGAUGAAGCCUGGUCCGG	Cleavage	locus=Chr22:2826280:2831512:+	1
bdi-miR166i-3p	CP_A09g00712	1	-1	1	21	539	559	UCGGACCAGGCUUCAUUCCCC	::.:::::::::::::::.	UUGGGAUGAAGCCUGGUCCGG	Cleavage	locus=Chr09:8933869:8939115:+	1
bdi-miR166i-3p	CP_A06g00792	1	-1	1	21	554	574	UCGGACCAGGCUUCAUUCCCC	::.:::::::::::::::.	CUGGGAUGAAGCCUGGUCCGG	Cleavage	locus=Chr06:9760801:9778666:+	1
bdi-miR166i-3p	CP_A06g00796	1	-1	1	21	554	574	UCGGACCAGGCUUCAUUCCCC	::.:::::::::::::::.	CUGGGAUGAAGCCUGGUCCGG	Cleavage	locus=Chr06:9819103:9829000:+	1
bdi-miR166i-3p	CP_B18g02110	1	-1	1	21	410	430	UCGGACCAGGCUUCAUUCCCC	::.:::::::::::::::.	CCGGGAUGAAGCCUGGUCCGG	Cleavage	locus=Chr18:32796467:32804508:-	1
bdi-miR166i-3p	CP_B18g01039	1	-1	1	21	554	574	UCGGACCAGGCUUCAUUCCCC	::.:::::::::::::::.	CUGGGAUGAAGCCUGGUCCGG	Cleavage	locus=Chr18:19637893:19644842:-	1
bdi-miR166i-3p	CP_B20g00613	1	-1	1	21	554	574	UCGGACCAGGCUUCAUUCCCC	::.:::::::::::::::.	CUGGGAUGAAGCCUGGUCCGG	Cleavage	locus=Chr20:8204475:8211842:-	1
bdi-miR166i-3p	CP_A07g00847	1	-1	1	21	554	574	UCGGACCAGGCUUCAUUCCCC	::.:::::::::::::::.	CUGGGAUGAAGCCUGGUCCGG	Cleavage	locus=Chr07:14812677:14820385:+	1
bdi-miR166j	CP_B22g00189	1	-1	1	21	539	559	UCGGACCAGGCUUCAUUCCUU	::.:::::::::::::::.	UUGGGAUGAAGCCUGGUCCGG	Cleavage	locus=Chr22:2826280:2831512:+	1
bdi-miR166j	CP_A09g00712	1	-1	1	21	539	559	UCGGACCAGGCUUCAUUCCUU	::.:::::::::::::::.	UUGGGAUGAAGCCUGGUCCGG	Cleavage	locus=Chr09:8933869:8939115:+	1
bdi-miR166j	CP_A06g00792	1	-1	1	21	554	574	UCGGACCAGGCUUCAUUCCUU	::.:::::::::::::::.	CUGGGAUGAAGCCUGGUCCGG	Cleavage	locus=Chr06:9760801:9778666:+	1
bdi-miR166j	CP_A06g00796	1	-1	1	21	554	574	UCGGACCAGGCUUCAUUCCUU	::.:::::::::::::::.	CUGGGAUGAAGCCUGGUCCGG	Cleavage	locus=Chr06:9819103:9829000:+	1
bdi-miR166j	CP_B18g02110	1	-1	1	21	410	430	UCGGACCAGGCUUCAUUCCUU	::.:::::::::::::::.	CCGGGAUGAAGCCUGGUCCGG	Cleavage	locus=Chr18:32796467:32804508:-	1
bdi-miR166j	CP_B18g01039	1	-1	1	21	554	574	UCGGACCAGGCUUCAUUCCUU	::.:::::::::::::::.	CUGGGAUGAAGCCUGGUCCGG	Cleavage	locus=Chr18:19637893:19644842:-	1
bdi-miR166j	CP_B20g00613	1	-1	1	21	554	574	UCGGACCAGGCUUCAUUCCUU	::.:::::::::::::::.	CUGGGAUGAAGCCUGGUCCGG	Cleavage	locus=Chr20:8204475:8211842:-	1
bdi-miR166j	CP_A07g00847	1	-1	1	21	554	574	UCGGACCAGGCUUCAUUCCUU	::.:::::::::::::::.	CUGGGAUGAAGCCUGGUCCGG	Cleavage	locus=Chr07:14812677:14820385:+	1
bna-miR166a	CP_B18g02110	1	-1	1	21	410	430	UCGGACCAGGCUUCAUUCCCC	::.:::::::::::::::.	CCGGGAUGAAGCCUGGUCCGG	Cleavage	locus=Chr18:32796467:32804508:-	1
bna-miR166a	CP_A07g00847	1	-1	1	21	554	574	UCGGACCAGGCUUCAUUCCCC	::.:::::::::::::::.	CUGGGAUGAAGCCUGGUCCGG	Cleavage	locus=Chr07:14812677:14820385:+	1
bna-miR166a	CP_B18g01039	1	-1	1	21	554	574	UCGGACCAGGCUUCAUUCCCC	::.:::::::::::::::.	CUGGGAUGAAGCCUGGUCCGG	Cleavage	locus=Chr18:19637893:19644842:-	1
bna-miR166a	CP_B20g00613	1	-1	1	21	554	574	UCGGACCAGGCUUCAUUCCCC	::.:::::::::::::::.	CUGGGAUGAAGCCUGGUCCGG	Cleavage	locus=Chr20:8204475:8211842:-	1
bna-miR166a	CP_B22g00189	1	-1	1	21	539	559	UCGGACCAGGCUUCAUUCCCC	::.:::::::::::::::.	UUGGGAUGAAGCCUGGUCCGG	Cleavage	locus=Chr22:2826280:2831512:+	1
bna-miR166a	CP_A09g00712	1	-1	1	21	539	559	UCGGACCAGGCUUCAUUCCCC	::.:::::::::::::::.	UUGGGAUGAAGCCUGGUCCGG	Cleavage	locus=Chr09:8933869:8939115:+	1
bna-miR166a	CP_A06g00792	1	-1	1	21	554	574	UCGGACCAGGCUUCAUUCCCC	::.:::::::::::::::.	CUGGGAUGAAGCCUGGUCCGG	Cleavage	locus=Chr06:9760801:9778666:+	1
bna-miR166a	CP_A06g00796	1	-1	1	21	554	574	UCGGACCAGGCUUCAUUCCCC	::.:::::::::::::::.	CUGGGAUGAAGCCUGGUCCGG	Cleavage	locus=Chr06:9819103:9829000:+	1
bna-miR166b	CP_A07g00847	1	-1	1	21	554	574	UCGGACCAGGCUUCAUUCCCC	::.:::::::::::::::.	CUGGGAUGAAGCCUGGUCCGG	Cleavage	locus=Chr07:14812677:14820385:+	1
bna-miR166b	CP_B18g01039	1	-1	1	21	554	574	UCGGACCAGGCUUCAUUCCCC	::.:::::::::::::::.	CUGGGAUGAAGCCUGGUCCGG	Cleavage	locus=Chr18:19637893:19644842:-	1
bna-miR166b	CP_B20g00613	1	-1	1	21	554	574	UCGGACCAGGCUUCAUUCCCC	::.:::::::::::::::.	CUGGGAUGAAGCCUGGUCCGG	Cleavage	locus=Chr20:8204475:8211842:-	1
bna-miR166b	CP_A09g00712	1	-1	1	21	539	559	UCGGACCAGGCUUCAUUCCCC	::.:::::::::::::::.	UUGGGAUGAAGCCUGGUCCGG	Cleavage	locus=Chr09:8933869:8939115:+	1
bna-miR166b	CP_B22g00189	1	-1	1	21	539	559	UCGGACCAGGCUUCAUUCCCC	::.:::::::::::::::.	UUGGGAUGAAGCCUGGUCCGG	Cleavage	locus=Chr22:2826280:2831512:+	1
bna-miR166b	CP_A06g00792	1	-1	1	21	554	574	UCGGACCAGGCUUCAUUCCCC	::.:::::::::::::::.	CUGGGAUGAAGCCUGGUCCGG	Cleavage	locus=Chr06:9760801:9778666:+	1
bna-miR166b	CP_B18g02110	1	-1	1	21	410	430	UCGGACCAGGCUUCAUUCCCC	::.:::::::::::::::.	CCGGGAUGAAGCCUGGUCCGG	Cleavage	locus=Chr18:32796467:32804508:-	1
bna-miR166b	CP_A06g00796	1	-1	1	21	554	574	UCGGACCAGGCUUCAUUCCCC	::.:::::::::::::::.	CUGGGAUGAAGCCUGGUCCGG	Cleavage	locus=Chr06:9819103:9829000:+	1
bna-miR166c	CP_A06g00796	1	-1	1	21	554	574	UCGGACCAGGCUUCAUUCCCC	::.:::::::::::::::.	CUGGGAUGAAGCCUGGUCCGG	Cleavage	locus=Chr06:9819103:9829000:+	1
bna-miR166c	CP_B18g01039	1	-1	1	21	554	574	UCGGACCAGGCUUCAUUCCCC	::.:::::::::::::::.	CUGGGAUGAAGCCUGGUCCGG	Cleavage	locus=Chr18:19637893:19644842:-	1
bna-miR166c	CP_A07g00847	1	-1	1	21	554	574	UCGGACCAGGCUUCAUUCCCC	::.:::::::::::::::.	CUGGGAUGAAGCCUGGUCCGG	Cleavage	locus=Chr07:14812677:14820385:+	1
bna-miR166c	CP_B20g00613	1	-1	1	21	554	574	UCGGACCAGGCUUCAUUCCCC	::.:::::::::::::::.	CUGGGAUGAAGCCUGGUCCGG	Cleavage	locus=Chr20:8204475:8211842:-	1
bna-miR166c	CP_A09g00712	1	-1	1	21	539	559	UCGGACCAGGCUUCAUUCCCC	::.:::::::::::::::.	UUGGGAUGAAGCCUGGUCCGG	Cleavage	locus=Chr09:8933869:8939115:+	1
bna-miR166c	CP_B22g00189	1	-1	1	21	539	559	UCGGACCAGGCUUCAUUCCCC	::.:::::::::::::::.	UUGGGAUGAAGCCUGGUCCGG	Cleavage	locus=Chr22:2826280:2831512:+	1
bna-miR166c	CP_A06g00792	1	-1	1	21	554	574	UCGGACCAGGCUUCAUUCCCC	::.:::::::::::::::.	CUGGGAUGAAGCCUGGUCCGG	Cleavage	locus=Chr06:9760801:9778666:+	1
bna-miR166c	CP_B18g02110	1	-1	1	21	410	430	UCGGACCAGGCUUCAUUCCCC	::.:::::::::::::::.	CCGGGAUGAAGCCUGGUCCGG	Cleavage	locus=Chr18:32796467:32804508:-	1
bna-miR166d	CP_B18g02110	1	-1	1	21	410	430	UCGGACCAGGCUUCAUUCCCC	::.:::::::::::::::.	CCGGGAUGAAGCCUGGUCCGG	Cleavage	locus=Chr18:32796467:32804508:-	1
bna-miR166d	CP_A07g00847	1	-1	1	21	554	574	UCGGACCAGGCUUCAUUCCCC	::.:::::::::::::::.	CUGGGAUGAAGCCUGGUCCGG	Cleavage	locus=Chr07:14812677:14820385:+	1
bna-miR166d	CP_B18g01039	1	-1	1	21	554	574	UCGGACCAGGCUUCAUUCCCC	::.:::::::::::::::.	CUGGGAUGAAGCCUGGUCCGG	Cleavage	locus=Chr18:19637893:19644842:-	1
bna-miR166d	CP_B20g00613	1	-1	1	21	554	574	UCGGACCAGGCUUCAUUCCCC	::.:::::::::::::::.	CUGGGAUGAAGCCUGGUCCGG	Cleavage	locus=Chr20:8204475:8211842:-	1
bna-miR166d	CP_A06g00792	1	-1	1	21	554	574	UCGGACCAGGCUUCAUUCCCC	::.:::::::::::::::.	CUGGGAUGAAGCCUGGUCCGG	Cleavage	locus=Chr06:9760801:9778666:+	1
bna-miR166d	CP_A09g00712	1	-1	1	21	539	559	UCGGACCAGGCUUCAUUCCCC	::.:::::::::::::::.	UUGGGAUGAAGCCUGGUCCGG	Cleavage	locus=Chr09:8933869:8939115:+	1
bna-miR166d	CP_B22g00189	1	-1	1	21	539	559	UCGGACCAGGCUUCAUUCCCC	::.:::::::::::::::.	UUGGGAUGAAGCCUGGUCCGG	Cleavage	locus=Chr22:2826280:2831512:+	1
bna-miR166d	CP_A06g00796	1	-1	1	21	554	574	UCGGACCAGGCUUCAUUCCCC	::.:::::::::::::::.	CUGGGAUGAAGCCUGGUCCGG	Cleavage	locus=Chr06:9819103:9829000:+	1
bna-miR166e	CP_A06g00796	1	-1	1	21	554	574	UCGGACCAGGCUUCAUUCCCC	::.:::::::::::::::.	CUGGGAUGAAGCCUGGUCCGG	Cleavage	locus=Chr06:9819103:9829000:+	1
bna-miR166e	CP_B18g02110	1	-1	1	21	410	430	UCGGACCAGGCUUCAUUCCCC	::.:::::::::::::::.	CCGGGAUGAAGCCUGGUCCGG	Cleavage	locus=Chr18:32796467:32804508:-	1
bna-miR166e	CP_B18g01039	1	-1	1	21	554	574	UCGGACCAGGCUUCAUUCCCC	::.:::::::::::::::.	CUGGGAUGAAGCCUGGUCCGG	Cleavage	locus=Chr18:19637893:19644842:-	1
bna-miR166e	CP_A07g00847	1	-1	1	21	554	574	UCGGACCAGGCUUCAUUCCCC	::.:::::::::::::::.	CUGGGAUGAAGCCUGGUCCGG	Cleavage	locus=Chr07:14812677:14820385:+	1
bna-miR166e	CP_B20g00613	1	-1	1	21	554	574	UCGGACCAGGCUUCAUUCCCC	::.:::::::::::::::.	CUGGGAUGAAGCCUGGUCCGG	Cleavage	locus=Chr20:8204475:8211842:-	1
bna-miR166e	CP_A09g00712	1	-1	1	21	539	559	UCGGACCAGGCUUCAUUCCCC	::.:::::::::::::::.	UUGGGAUGAAGCCUGGUCCGG	Cleavage	locus=Chr09:8933869:8939115:+	1
bna-miR166e	CP_A06g00792	1	-1	1	21	554	574	UCGGACCAGGCUUCAUUCCCC	::.:::::::::::::::.	CUGGGAUGAAGCCUGGUCCGG	Cleavage	locus=Chr06:9760801:9778666:+	1
bna-miR166e	CP_B22g00189	1	-1	1	21	539	559	UCGGACCAGGCUUCAUUCCCC	::.:::::::::::::::.	UUGGGAUGAAGCCUGGUCCGG	Cleavage	locus=Chr22:2826280:2831512:+	1
cme-miR166a	CP_B18g02110	1	-1	1	21	410	430	UCGGACCAGGCUUCAUUCCCC	::.:::::::::::::::.	CCGGGAUGAAGCCUGGUCCGG	Cleavage	locus=Chr18:32796467:32804508:-	1
cme-miR166a	CP_B22g00189	1	-1	1	21	539	559	UCGGACCAGGCUUCAUUCCCC	::.:::::::::::::::.	UUGGGAUGAAGCCUGGUCCGG	Cleavage	locus=Chr22:2826280:2831512:+	1
cme-miR166a	CP_A09g00712	1	-1	1	21	539	559	UCGGACCAGGCUUCAUUCCCC	::.:::::::::::::::.	UUGGGAUGAAGCCUGGUCCGG	Cleavage	locus=Chr09:8933869:8939115:+	1
cme-miR166a	CP_A06g00792	1	-1	1	21	554	574	UCGGACCAGGCUUCAUUCCCC	::.:::::::::::::::.	CUGGGAUGAAGCCUGGUCCGG	Cleavage	locus=Chr06:9760801:9778666:+	1
cme-miR166a	CP_A06g00796	1	-1	1	21	554	574	UCGGACCAGGCUUCAUUCCCC	::.:::::::::::::::.	CUGGGAUGAAGCCUGGUCCGG	Cleavage	locus=Chr06:9819103:9829000:+	1
cme-miR166a	CP_B18g01039	1	-1	1	21	554	574	UCGGACCAGGCUUCAUUCCCC	::.:::::::::::::::.	CUGGGAUGAAGCCUGGUCCGG	Cleavage	locus=Chr18:19637893:19644842:-	1
cme-miR166a	CP_B20g00613	1	-1	1	21	554	574	UCGGACCAGGCUUCAUUCCCC	::.:::::::::::::::.	CUGGGAUGAAGCCUGGUCCGG	Cleavage	locus=Chr20:8204475:8211842:-	1
cme-miR166a	CP_A07g00847	1	-1	1	21	554	574	UCGGACCAGGCUUCAUUCCCC	::.:::::::::::::::.	CUGGGAUGAAGCCUGGUCCGG	Cleavage	locus=Chr07:14812677:14820385:+	1
cme-miR166b	CP_A06g00792	1	-1	1	21	554	574	UCGGACCAGGCUUCAUUCCCC	::.:::::::::::::::.	CUGGGAUGAAGCCUGGUCCGG	Cleavage	locus=Chr06:9760801:9778666:+	1
cme-miR166b	CP_A06g00796	1	-1	1	21	554	574	UCGGACCAGGCUUCAUUCCCC	::.:::::::::::::::.	CUGGGAUGAAGCCUGGUCCGG	Cleavage	locus=Chr06:9819103:9829000:+	1
cme-miR166b	CP_B18g02110	1	-1	1	21	410	430	UCGGACCAGGCUUCAUUCCCC	::.:::::::::::::::.	CCGGGAUGAAGCCUGGUCCGG	Cleavage	locus=Chr18:32796467:32804508:-	1
cme-miR166b	CP_B18g01039	1	-1	1	21	554	574	UCGGACCAGGCUUCAUUCCCC	::.:::::::::::::::.	CUGGGAUGAAGCCUGGUCCGG	Cleavage	locus=Chr18:19637893:19644842:-	1
cme-miR166b	CP_B20g00613	1	-1	1	21	554	574	UCGGACCAGGCUUCAUUCCCC	::.:::::::::::::::.	CUGGGAUGAAGCCUGGUCCGG	Cleavage	locus=Chr20:8204475:8211842:-	1
cme-miR166b	CP_A07g00847	1	-1	1	21	554	574	UCGGACCAGGCUUCAUUCCCC	::.:::::::::::::::.	CUGGGAUGAAGCCUGGUCCGG	Cleavage	locus=Chr07:14812677:14820385:+	1
cme-miR166b	CP_A09g00712	1	-1	1	21	539	559	UCGGACCAGGCUUCAUUCCCC	::.:::::::::::::::.	UUGGGAUGAAGCCUGGUCCGG	Cleavage	locus=Chr09:8933869:8939115:+	1
cme-miR166b	CP_B22g00189	1	-1	1	21	539	559	UCGGACCAGGCUUCAUUCCCC	::.:::::::::::::::.	UUGGGAUGAAGCCUGGUCCGG	Cleavage	locus=Chr22:2826280:2831512:+	1
cme-miR166c	CP_A06g00792	1	-1	1	21	554	574	UCGGACCAGGCUUCAUUCCCC	::.:::::::::::::::.	CUGGGAUGAAGCCUGGUCCGG	Cleavage	locus=Chr06:9760801:9778666:+	1
cme-miR166c	CP_A09g00712	1	-1	1	21	539	559	UCGGACCAGGCUUCAUUCCCC	::.:::::::::::::::.	UUGGGAUGAAGCCUGGUCCGG	Cleavage	locus=Chr09:8933869:8939115:+	1
cme-miR166c	CP_B22g00189	1	-1	1	21	539	559	UCGGACCAGGCUUCAUUCCCC	::.:::::::::::::::.	UUGGGAUGAAGCCUGGUCCGG	Cleavage	locus=Chr22:2826280:2831512:+	1
cme-miR166c	CP_A06g00796	1	-1	1	21	554	574	UCGGACCAGGCUUCAUUCCCC	::.:::::::::::::::.	CUGGGAUGAAGCCUGGUCCGG	Cleavage	locus=Chr06:9819103:9829000:+	1
cme-miR166c	CP_B18g02110	1	-1	1	21	410	430	UCGGACCAGGCUUCAUUCCCC	::.:::::::::::::::.	CCGGGAUGAAGCCUGGUCCGG	Cleavage	locus=Chr18:32796467:32804508:-	1
cme-miR166c	CP_B18g01039	1	-1	1	21	554	574	UCGGACCAGGCUUCAUUCCCC	::.:::::::::::::::.	CUGGGAUGAAGCCUGGUCCGG	Cleavage	locus=Chr18:19637893:19644842:-	1
cme-miR166c	CP_B20g00613	1	-1	1	21	554	574	UCGGACCAGGCUUCAUUCCCC	::.:::::::::::::::.	CUGGGAUGAAGCCUGGUCCGG	Cleavage	locus=Chr20:8204475:8211842:-	1
cme-miR166c	CP_A07g00847	1	-1	1	21	554	574	UCGGACCAGGCUUCAUUCCCC	::.:::::::::::::::.	CUGGGAUGAAGCCUGGUCCGG	Cleavage	locus=Chr07:14812677:14820385:+	1
cme-miR166d	CP_B18g02110	1	-1	1	21	410	430	UCGGACCAGGCUUCAUUCCCC	::.:::::::::::::::.	CCGGGAUGAAGCCUGGUCCGG	Cleavage	locus=Chr18:32796467:32804508:-	1
cme-miR166d	CP_A07g00847	1	-1	1	21	554	574	UCGGACCAGGCUUCAUUCCCC	::.:::::::::::::::.	CUGGGAUGAAGCCUGGUCCGG	Cleavage	locus=Chr07:14812677:14820385:+	1
cme-miR166d	CP_B18g01039	1	-1	1	21	554	574	UCGGACCAGGCUUCAUUCCCC	::.:::::::::::::::.	CUGGGAUGAAGCCUGGUCCGG	Cleavage	locus=Chr18:19637893:19644842:-	1
cme-miR166d	CP_B20g00613	1	-1	1	21	554	574	UCGGACCAGGCUUCAUUCCCC	::.:::::::::::::::.	CUGGGAUGAAGCCUGGUCCGG	Cleavage	locus=Chr20:8204475:8211842:-	1
cme-miR166d	CP_B22g00189	1	-1	1	21	539	559	UCGGACCAGGCUUCAUUCCCC	::.:::::::::::::::.	UUGGGAUGAAGCCUGGUCCGG	Cleavage	locus=Chr22:2826280:2831512:+	1
cme-miR166d	CP_A09g00712	1	-1	1	21	539	559	UCGGACCAGGCUUCAUUCCCC	::.:::::::::::::::.	UUGGGAUGAAGCCUGGUCCGG	Cleavage	locus=Chr09:8933869:8939115:+	1
cme-miR166d	CP_A06g00792	1	-1	1	21	554	574	UCGGACCAGGCUUCAUUCCCC	::.:::::::::::::::.	CUGGGAUGAAGCCUGGUCCGG	Cleavage	locus=Chr06:9760801:9778666:+	1
cme-miR166d	CP_A06g00796	1	-1	1	21	554	574	UCGGACCAGGCUUCAUUCCCC	::.:::::::::::::::.	CUGGGAUGAAGCCUGGUCCGG	Cleavage	locus=Chr06:9819103:9829000:+	1
cme-miR166e	CP_B22g00189	1	-1	1	21	539	559	UCGGACCAGGCUUCAUUCCUC	::.:::::::::::::::.	UUGGGAUGAAGCCUGGUCCGG	Cleavage	locus=Chr22:2826280:2831512:+	1
cme-miR166e	CP_A09g00712	1	-1	1	21	539	559	UCGGACCAGGCUUCAUUCCUC	::.:::::::::::::::.	UUGGGAUGAAGCCUGGUCCGG	Cleavage	locus=Chr09:8933869:8939115:+	1
cme-miR166e	CP_A06g00792	1	-1	1	21	554	574	UCGGACCAGGCUUCAUUCCUC	::.:::::::::::::::.	CUGGGAUGAAGCCUGGUCCGG	Cleavage	locus=Chr06:9760801:9778666:+	1
cme-miR166e	CP_B18g02110	1	-1	1	21	410	430	UCGGACCAGGCUUCAUUCCUC	::.:::::::::::::::.	CCGGGAUGAAGCCUGGUCCGG	Cleavage	locus=Chr18:32796467:32804508:-	1
cme-miR166e	CP_B18g01039	1	-1	1	21	554	574	UCGGACCAGGCUUCAUUCCUC	::.:::::::::::::::.	CUGGGAUGAAGCCUGGUCCGG	Cleavage	locus=Chr18:19637893:19644842:-	1
cme-miR166e	CP_B20g00613	1	-1	1	21	554	574	UCGGACCAGGCUUCAUUCCUC	::.:::::::::::::::.	CUGGGAUGAAGCCUGGUCCGG	Cleavage	locus=Chr20:8204475:8211842:-	1
cme-miR166e	CP_A07g00847	1	-1	1	21	554	574	UCGGACCAGGCUUCAUUCCUC	::.:::::::::::::::.	CUGGGAUGAAGCCUGGUCCGG	Cleavage	locus=Chr07:14812677:14820385:+	1
cme-miR166e	CP_A06g00796	1	-1	1	21	554	574	UCGGACCAGGCUUCAUUCCUC	::.:::::::::::::::.	CUGGGAUGAAGCCUGGUCCGG	Cleavage	locus=Chr06:9819103:9829000:+	1
cme-miR166f	CP_B22g00189	1	-1	1	21	539	559	UCGGACCAGGCUUCAUUCCCC	::.:::::::::::::::.	UUGGGAUGAAGCCUGGUCCGG	Cleavage	locus=Chr22:2826280:2831512:+	1
cme-miR166f	CP_A09g00712	1	-1	1	21	539	559	UCGGACCAGGCUUCAUUCCCC	::.:::::::::::::::.	UUGGGAUGAAGCCUGGUCCGG	Cleavage	locus=Chr09:8933869:8939115:+	1
cme-miR166f	CP_A06g00792	1	-1	1	21	554	574	UCGGACCAGGCUUCAUUCCCC	::.:::::::::::::::.	CUGGGAUGAAGCCUGGUCCGG	Cleavage	locus=Chr06:9760801:9778666:+	1
cme-miR166f	CP_B18g02110	1	-1	1	21	410	430	UCGGACCAGGCUUCAUUCCCC	::.:::::::::::::::.	CCGGGAUGAAGCCUGGUCCGG	Cleavage	locus=Chr18:32796467:32804508:-	1
cme-miR166f	CP_A06g00796	1	-1	1	21	554	574	UCGGACCAGGCUUCAUUCCCC	::.:::::::::::::::.	CUGGGAUGAAGCCUGGUCCGG	Cleavage	locus=Chr06:9819103:9829000:+	1
cme-miR166f	CP_B18g01039	1	-1	1	21	554	574	UCGGACCAGGCUUCAUUCCCC	::.:::::::::::::::.	CUGGGAUGAAGCCUGGUCCGG	Cleavage	locus=Chr18:19637893:19644842:-	1
cme-miR166f	CP_B20g00613	1	-1	1	21	554	574	UCGGACCAGGCUUCAUUCCCC	::.:::::::::::::::.	CUGGGAUGAAGCCUGGUCCGG	Cleavage	locus=Chr20:8204475:8211842:-	1
cme-miR166f	CP_A07g00847	1	-1	1	21	554	574	UCGGACCAGGCUUCAUUCCCC	::.:::::::::::::::.	CUGGGAUGAAGCCUGGUCCGG	Cleavage	locus=Chr07:14812677:14820385:+	1
cme-miR166g	CP_B18g02110	1	-1	1	20	411	430	UCGGACCAGGCUUCAUUCCC	::.:::::::::::::::.	CGGGAUGAAGCCUGGUCCGG	Cleavage	locus=Chr18:32796467:32804508:-	1
cme-miR166g	CP_A06g00796	1	-1	1	20	555	574	UCGGACCAGGCUUCAUUCCC	::.:::::::::::::::.	UGGGAUGAAGCCUGGUCCGG	Cleavage	locus=Chr06:9819103:9829000:+	1
cme-miR166g	CP_B18g01039	1	-1	1	20	555	574	UCGGACCAGGCUUCAUUCCC	::.:::::::::::::::.	UGGGAUGAAGCCUGGUCCGG	Cleavage	locus=Chr18:19637893:19644842:-	1
cme-miR166g	CP_A07g00847	1	-1	1	20	555	574	UCGGACCAGGCUUCAUUCCC	::.:::::::::::::::.	UGGGAUGAAGCCUGGUCCGG	Cleavage	locus=Chr07:14812677:14820385:+	1
cme-miR166g	CP_B20g00613	1	-1	1	20	555	574	UCGGACCAGGCUUCAUUCCC	::.:::::::::::::::.	UGGGAUGAAGCCUGGUCCGG	Cleavage	locus=Chr20:8204475:8211842:-	1
cme-miR166g	CP_A06g00792	1	-1	1	20	555	574	UCGGACCAGGCUUCAUUCCC	::.:::::::::::::::.	UGGGAUGAAGCCUGGUCCGG	Cleavage	locus=Chr06:9760801:9778666:+	1
cme-miR166g	CP_A09g00712	1	-1	1	20	540	559	UCGGACCAGGCUUCAUUCCC	::.:::::::::::::::.	UGGGAUGAAGCCUGGUCCGG	Cleavage	locus=Chr09:8933869:8939115:+	1
cme-miR166g	CP_B22g00189	1	-1	1	20	540	559	UCGGACCAGGCUUCAUUCCC	::.:::::::::::::::.	UGGGAUGAAGCCUGGUCCGG	Cleavage	locus=Chr22:2826280:2831512:+	1
cme-miR166h	CP_B18g02110	1	-1	1	21	410	430	UCGGACCAGGCUUCAUUCCCC	::.:::::::::::::::.	CCGGGAUGAAGCCUGGUCCGG	Cleavage	locus=Chr18:32796467:32804508:-	1
cme-miR166h	CP_A06g00796	1	-1	1	21	554	574	UCGGACCAGGCUUCAUUCCCC	::.:::::::::::::::.	CUGGGAUGAAGCCUGGUCCGG	Cleavage	locus=Chr06:9819103:9829000:+	1
cme-miR166h	CP_B18g01039	1	-1	1	21	554	574	UCGGACCAGGCUUCAUUCCCC	::.:::::::::::::::.	CUGGGAUGAAGCCUGGUCCGG	Cleavage	locus=Chr18:19637893:19644842:-	1
cme-miR166h	CP_A07g00847	1	-1	1	21	554	574	UCGGACCAGGCUUCAUUCCCC	::.:::::::::::::::.	CUGGGAUGAAGCCUGGUCCGG	Cleavage	locus=Chr07:14812677:14820385:+	1
cme-miR166h	CP_B20g00613	1	-1	1	21	554	574	UCGGACCAGGCUUCAUUCCCC	::.:::::::::::::::.	CUGGGAUGAAGCCUGGUCCGG	Cleavage	locus=Chr20:8204475:8211842:-	1
cme-miR166h	CP_A06g00792	1	-1	1	21	554	574	UCGGACCAGGCUUCAUUCCCC	::.:::::::::::::::.	CUGGGAUGAAGCCUGGUCCGG	Cleavage	locus=Chr06:9760801:9778666:+	1
cme-miR166h	CP_A09g00712	1	-1	1	21	539	559	UCGGACCAGGCUUCAUUCCCC	::.:::::::::::::::.	UUGGGAUGAAGCCUGGUCCGG	Cleavage	locus=Chr09:8933869:8939115:+	1
cme-miR166h	CP_B22g00189	1	-1	1	21	539	559	UCGGACCAGGCUUCAUUCCCC	::.:::::::::::::::.	UUGGGAUGAAGCCUGGUCCGG	Cleavage	locus=Chr22:2826280:2831512:+	1
cpa-miR166a	CP_A07g00847	1	-1	1	21	554	574	UCGGACCAGGCUUCAUUCCCC	::.:::::::::::::::.	CUGGGAUGAAGCCUGGUCCGG	Cleavage	locus=Chr07:14812677:14820385:+	1
cpa-miR166a	CP_B18g01039	1	-1	1	21	554	574	UCGGACCAGGCUUCAUUCCCC	::.:::::::::::::::.	CUGGGAUGAAGCCUGGUCCGG	Cleavage	locus=Chr18:19637893:19644842:-	1
cpa-miR166a	CP_B20g00613	1	-1	1	21	554	574	UCGGACCAGGCUUCAUUCCCC	::.:::::::::::::::.	CUGGGAUGAAGCCUGGUCCGG	Cleavage	locus=Chr20:8204475:8211842:-	1
cpa-miR166a	CP_A09g00712	1	-1	1	21	539	559	UCGGACCAGGCUUCAUUCCCC	::.:::::::::::::::.	UUGGGAUGAAGCCUGGUCCGG	Cleavage	locus=Chr09:8933869:8939115:+	1
cpa-miR166a	CP_B22g00189	1	-1	1	21	539	559	UCGGACCAGGCUUCAUUCCCC	::.:::::::::::::::.	UUGGGAUGAAGCCUGGUCCGG	Cleavage	locus=Chr22:2826280:2831512:+	1
cpa-miR166a	CP_A06g00792	1	-1	1	21	554	574	UCGGACCAGGCUUCAUUCCCC	::.:::::::::::::::.	CUGGGAUGAAGCCUGGUCCGG	Cleavage	locus=Chr06:9760801:9778666:+	1
cpa-miR166a	CP_A06g00796	1	-1	1	21	554	574	UCGGACCAGGCUUCAUUCCCC	::.:::::::::::::::.	CUGGGAUGAAGCCUGGUCCGG	Cleavage	locus=Chr06:9819103:9829000:+	1
cpa-miR166a	CP_B18g02110	1	-1	1	21	410	430	UCGGACCAGGCUUCAUUCCCC	::.:::::::::::::::.	CCGGGAUGAAGCCUGGUCCGG	Cleavage	locus=Chr18:32796467:32804508:-	1
cpa-miR166b	CP_A07g00847	1	-1	1	21	554	574	UCGGACCAGGCUUCAUUCCCC	::.:::::::::::::::.	CUGGGAUGAAGCCUGGUCCGG	Cleavage	locus=Chr07:14812677:14820385:+	1
cpa-miR166b	CP_B18g01039	1	-1	1	21	554	574	UCGGACCAGGCUUCAUUCCCC	::.:::::::::::::::.	CUGGGAUGAAGCCUGGUCCGG	Cleavage	locus=Chr18:19637893:19644842:-	1
cpa-miR166b	CP_B20g00613	1	-1	1	21	554	574	UCGGACCAGGCUUCAUUCCCC	::.:::::::::::::::.	CUGGGAUGAAGCCUGGUCCGG	Cleavage	locus=Chr20:8204475:8211842:-	1
cpa-miR166b	CP_A09g00712	1	-1	1	21	539	559	UCGGACCAGGCUUCAUUCCCC	::.:::::::::::::::.	UUGGGAUGAAGCCUGGUCCGG	Cleavage	locus=Chr09:8933869:8939115:+	1
cpa-miR166b	CP_B22g00189	1	-1	1	21	539	559	UCGGACCAGGCUUCAUUCCCC	::.:::::::::::::::.	UUGGGAUGAAGCCUGGUCCGG	Cleavage	locus=Chr22:2826280:2831512:+	1
cpa-miR166b	CP_A06g00792	1	-1	1	21	554	574	UCGGACCAGGCUUCAUUCCCC	::.:::::::::::::::.	CUGGGAUGAAGCCUGGUCCGG	Cleavage	locus=Chr06:9760801:9778666:+	1
cpa-miR166b	CP_A06g00796	1	-1	1	21	554	574	UCGGACCAGGCUUCAUUCCCC	::.:::::::::::::::.	CUGGGAUGAAGCCUGGUCCGG	Cleavage	locus=Chr06:9819103:9829000:+	1
cpa-miR166b	CP_B18g02110	1	-1	1	21	410	430	UCGGACCAGGCUUCAUUCCCC	::.:::::::::::::::.	CCGGGAUGAAGCCUGGUCCGG	Cleavage	locus=Chr18:32796467:32804508:-	1
cpa-miR166c	CP_A06g00792	1	-1	1	21	554	574	UCGGACCAGGCUUCAUUCCCC	::.:::::::::::::::.	CUGGGAUGAAGCCUGGUCCGG	Cleavage	locus=Chr06:9760801:9778666:+	1
cpa-miR166c	CP_A06g00796	1	-1	1	21	554	574	UCGGACCAGGCUUCAUUCCCC	::.:::::::::::::::.	CUGGGAUGAAGCCUGGUCCGG	Cleavage	locus=Chr06:9819103:9829000:+	1
cpa-miR166c	CP_B18g02110	1	-1	1	21	410	430	UCGGACCAGGCUUCAUUCCCC	::.:::::::::::::::.	CCGGGAUGAAGCCUGGUCCGG	Cleavage	locus=Chr18:32796467:32804508:-	1
cpa-miR166c	CP_B18g01039	1	-1	1	21	554	574	UCGGACCAGGCUUCAUUCCCC	::.:::::::::::::::.	CUGGGAUGAAGCCUGGUCCGG	Cleavage	locus=Chr18:19637893:19644842:-	1
cpa-miR166c	CP_B20g00613	1	-1	1	21	554	574	UCGGACCAGGCUUCAUUCCCC	::.:::::::::::::::.	CUGGGAUGAAGCCUGGUCCGG	Cleavage	locus=Chr20:8204475:8211842:-	1
cpa-miR166c	CP_A07g00847	1	-1	1	21	554	574	UCGGACCAGGCUUCAUUCCCC	::.:::::::::::::::.	CUGGGAUGAAGCCUGGUCCGG	Cleavage	locus=Chr07:14812677:14820385:+	1
cpa-miR166c	CP_A09g00712	1	-1	1	21	539	559	UCGGACCAGGCUUCAUUCCCC	::.:::::::::::::::.	UUGGGAUGAAGCCUGGUCCGG	Cleavage	locus=Chr09:8933869:8939115:+	1
cpa-miR166c	CP_B22g00189	1	-1	1	21	539	559	UCGGACCAGGCUUCAUUCCCC	::.:::::::::::::::.	UUGGGAUGAAGCCUGGUCCGG	Cleavage	locus=Chr22:2826280:2831512:+	1
cpa-miR166d	CP_A06g00796	1	-1	1	21	554	574	UCGGACCAGGCUUCAUUCCCG	: ::.:::::::::::::::.	CUGGGAUGAAGCCUGGUCCGG	Cleavage	locus=Chr06:9819103:9829000:+	1
cpa-miR166d	CP_B18g02110	1	-1	1	21	410	430	UCGGACCAGGCUUCAUUCCCG	: ::.:::::::::::::::.	CCGGGAUGAAGCCUGGUCCGG	Cleavage	locus=Chr18:32796467:32804508:-	1
cpa-miR166d	CP_B18g01039	1	-1	1	21	554	574	UCGGACCAGGCUUCAUUCCCG	: ::.:::::::::::::::.	CUGGGAUGAAGCCUGGUCCGG	Cleavage	locus=Chr18:19637893:19644842:-	1
cpa-miR166d	CP_A07g00847	1	-1	1	21	554	574	UCGGACCAGGCUUCAUUCCCG	: ::.:::::::::::::::.	CUGGGAUGAAGCCUGGUCCGG	Cleavage	locus=Chr07:14812677:14820385:+	1
cpa-miR166d	CP_B20g00613	1	-1	1	21	554	574	UCGGACCAGGCUUCAUUCCCG	: ::.:::::::::::::::.	CUGGGAUGAAGCCUGGUCCGG	Cleavage	locus=Chr20:8204475:8211842:-	1
cpa-miR166d	CP_A06g00792	1	-1	1	21	554	574	UCGGACCAGGCUUCAUUCCCG	: ::.:::::::::::::::.	CUGGGAUGAAGCCUGGUCCGG	Cleavage	locus=Chr06:9760801:9778666:+	1
cpa-miR166d	CP_A09g00712	1	-1	1	21	539	559	UCGGACCAGGCUUCAUUCCCG	::.:::::::::::::::.	UUGGGAUGAAGCCUGGUCCGG	Cleavage	locus=Chr09:8933869:8939115:+	1
cpa-miR166d	CP_B22g00189	1	-1	1	21	539	559	UCGGACCAGGCUUCAUUCCCG	::.:::::::::::::::.	UUGGGAUGAAGCCUGGUCCGG	Cleavage	locus=Chr22:2826280:2831512:+	1
crt-miR166a	CP_B18g02110	1	-1	1	22	409	430	UCGGACCAGGCUUCAUUCCCGU	: ::.:::::::::::::::.	CCCGGGAUGAAGCCUGGUCCGG	Cleavage	locus=Chr18:32796467:32804508:-	1
crt-miR166a	CP_A06g00792	1	-1	1	22	553	574	UCGGACCAGGCUUCAUUCCCGU	: ::.:::::::::::::::.	CCUGGGAUGAAGCCUGGUCCGG	Cleavage	locus=Chr06:9760801:9778666:+	1
crt-miR166a	CP_A06g00796	1	-1	1	22	553	574	UCGGACCAGGCUUCAUUCCCGU	: ::.:::::::::::::::.	CCUGGGAUGAAGCCUGGUCCGG	Cleavage	locus=Chr06:9819103:9829000:+	1
crt-miR166a	CP_B18g01039	1	-1	1	22	553	574	UCGGACCAGGCUUCAUUCCCGU	: ::.:::::::::::::::.	CCUGGGAUGAAGCCUGGUCCGG	Cleavage	locus=Chr18:19637893:19644842:-	1
crt-miR166a	CP_B20g00613	1	-1	1	22	553	574	UCGGACCAGGCUUCAUUCCCGU	: ::.:::::::::::::::.	CCUGGGAUGAAGCCUGGUCCGG	Cleavage	locus=Chr20:8204475:8211842:-	1
crt-miR166a	CP_A07g00847	1	-1	1	22	553	574	UCGGACCAGGCUUCAUUCCCGU	: ::.:::::::::::::::.	CCUGGGAUGAAGCCUGGUCCGG	Cleavage	locus=Chr07:14812677:14820385:+	1
crt-miR166a	CP_A09g00712	1	-1	1	22	538	559	UCGGACCAGGCUUCAUUCCCGU	::.:::::::::::::::.	CUUGGGAUGAAGCCUGGUCCGG	Cleavage	locus=Chr09:8933869:8939115:+	1
crt-miR166a	CP_B22g00189	1	-1	1	22	538	559	UCGGACCAGGCUUCAUUCCCGU	::.:::::::::::::::.	CUUGGGAUGAAGCCUGGUCCGG	Cleavage	locus=Chr22:2826280:2831512:+	1
crt-miR166b	CP_B18g02110	1	-1	1	22	409	430	UCGGACCAGGCUUCAUUCCCUU	::.:::::::::::::::.	CCCGGGAUGAAGCCUGGUCCGG	Cleavage	locus=Chr18:32796467:32804508:-	1
crt-miR166b	CP_B22g00189	1	-1	1	22	538	559	UCGGACCAGGCUUCAUUCCCUU	::.:::::::::::::::.	CUUGGGAUGAAGCCUGGUCCGG	Cleavage	locus=Chr22:2826280:2831512:+	1
crt-miR166b	CP_A06g00792	1	-1	1	22	553	574	UCGGACCAGGCUUCAUUCCCUU	::.:::::::::::::::.	CCUGGGAUGAAGCCUGGUCCGG	Cleavage	locus=Chr06:9760801:9778666:+	1
crt-miR166b	CP_A09g00712	1	-1	1	22	538	559	UCGGACCAGGCUUCAUUCCCUU	::.:::::::::::::::.	CUUGGGAUGAAGCCUGGUCCGG	Cleavage	locus=Chr09:8933869:8939115:+	1
crt-miR166b	CP_A06g00796	1	-1	1	22	553	574	UCGGACCAGGCUUCAUUCCCUU	::.:::::::::::::::.	CCUGGGAUGAAGCCUGGUCCGG	Cleavage	locus=Chr06:9819103:9829000:+	1
crt-miR166b	CP_B18g01039	1	-1	1	22	553	574	UCGGACCAGGCUUCAUUCCCUU	::.:::::::::::::::.	CCUGGGAUGAAGCCUGGUCCGG	Cleavage	locus=Chr18:19637893:19644842:-	1
crt-miR166b	CP_B20g00613	1	-1	1	22	553	574	UCGGACCAGGCUUCAUUCCCUU	::.:::::::::::::::.	CCUGGGAUGAAGCCUGGUCCGG	Cleavage	locus=Chr20:8204475:8211842:-	1
crt-miR166b	CP_A07g00847	1	-1	1	22	553	574	UCGGACCAGGCUUCAUUCCCUU	::.:::::::::::::::.	CCUGGGAUGAAGCCUGGUCCGG	Cleavage	locus=Chr07:14812677:14820385:+	1
csi-miR166a	CP_B18g02110	1	-1	1	22	409	430	UCGGACCAGGCUUCAUUCCCCC	::.:::::::::::::::.	CCCGGGAUGAAGCCUGGUCCGG	Cleavage	locus=Chr18:32796467:32804508:-	1
csi-miR166a	CP_A07g00847	1	-1	1	22	553	574	UCGGACCAGGCUUCAUUCCCCC	::.:::::::::::::::.	CCUGGGAUGAAGCCUGGUCCGG	Cleavage	locus=Chr07:14812677:14820385:+	1
csi-miR166a	CP_B18g01039	1	-1	1	22	553	574	UCGGACCAGGCUUCAUUCCCCC	::.:::::::::::::::.	CCUGGGAUGAAGCCUGGUCCGG	Cleavage	locus=Chr18:19637893:19644842:-	1
csi-miR166a	CP_B20g00613	1	-1	1	22	553	574	UCGGACCAGGCUUCAUUCCCCC	::.:::::::::::::::.	CCUGGGAUGAAGCCUGGUCCGG	Cleavage	locus=Chr20:8204475:8211842:-	1
csi-miR166a	CP_B22g00189	1	-1	1	22	538	559	UCGGACCAGGCUUCAUUCCCCC	::.:::::::::::::::.	CUUGGGAUGAAGCCUGGUCCGG	Cleavage	locus=Chr22:2826280:2831512:+	1
csi-miR166a	CP_A09g00712	1	-1	1	22	538	559	UCGGACCAGGCUUCAUUCCCCC	::.:::::::::::::::.	CUUGGGAUGAAGCCUGGUCCGG	Cleavage	locus=Chr09:8933869:8939115:+	1
csi-miR166a	CP_A06g00792	1	-1	1	22	553	574	UCGGACCAGGCUUCAUUCCCCC	::.:::::::::::::::.	CCUGGGAUGAAGCCUGGUCCGG	Cleavage	locus=Chr06:9760801:9778666:+	1
csi-miR166a	CP_A06g00796	1	-1	1	22	553	574	UCGGACCAGGCUUCAUUCCCCC	::.:::::::::::::::.	CCUGGGAUGAAGCCUGGUCCGG	Cleavage	locus=Chr06:9819103:9829000:+	1
csi-miR166b	CP_A07g00847	1	-1	1	22	553	574	UCGGACCAGGCUUCAUUCCCGU	: ::.:::::::::::::::.	CCUGGGAUGAAGCCUGGUCCGG	Cleavage	locus=Chr07:14812677:14820385:+	1
csi-miR166b	CP_B18g01039	1	-1	1	22	553	574	UCGGACCAGGCUUCAUUCCCGU	: ::.:::::::::::::::.	CCUGGGAUGAAGCCUGGUCCGG	Cleavage	locus=Chr18:19637893:19644842:-	1
csi-miR166b	CP_B20g00613	1	-1	1	22	553	574	UCGGACCAGGCUUCAUUCCCGU	: ::.:::::::::::::::.	CCUGGGAUGAAGCCUGGUCCGG	Cleavage	locus=Chr20:8204475:8211842:-	1
csi-miR166b	CP_A06g00792	1	-1	1	22	553	574	UCGGACCAGGCUUCAUUCCCGU	: ::.:::::::::::::::.	CCUGGGAUGAAGCCUGGUCCGG	Cleavage	locus=Chr06:9760801:9778666:+	1
csi-miR166b	CP_A06g00796	1	-1	1	22	553	574	UCGGACCAGGCUUCAUUCCCGU	: ::.:::::::::::::::.	CCUGGGAUGAAGCCUGGUCCGG	Cleavage	locus=Chr06:9819103:9829000:+	1
csi-miR166b	CP_B18g02110	1	-1	1	22	409	430	UCGGACCAGGCUUCAUUCCCGU	: ::.:::::::::::::::.	CCCGGGAUGAAGCCUGGUCCGG	Cleavage	locus=Chr18:32796467:32804508:-	1
csi-miR166b	CP_A09g00712	1	-1	1	22	538	559	UCGGACCAGGCUUCAUUCCCGU	::.:::::::::::::::.	CUUGGGAUGAAGCCUGGUCCGG	Cleavage	locus=Chr09:8933869:8939115:+	1
csi-miR166b	CP_B22g00189	1	-1	1	22	538	559	UCGGACCAGGCUUCAUUCCCGU	::.:::::::::::::::.	CUUGGGAUGAAGCCUGGUCCGG	Cleavage	locus=Chr22:2826280:2831512:+	1
csi-miR166c	CP_B22g00189	1	-1	1	20	540	559	UCGGACCAGGCUUCAUUCCC	::.:::::::::::::::.	UGGGAUGAAGCCUGGUCCGG	Cleavage	locus=Chr22:2826280:2831512:+	1
csi-miR166c	CP_A09g00712	1	-1	1	20	540	559	UCGGACCAGGCUUCAUUCCC	::.:::::::::::::::.	UGGGAUGAAGCCUGGUCCGG	Cleavage	locus=Chr09:8933869:8939115:+	1
csi-miR166c	CP_A06g00796	1	-1	1	20	555	574	UCGGACCAGGCUUCAUUCCC	::.:::::::::::::::.	UGGGAUGAAGCCUGGUCCGG	Cleavage	locus=Chr06:9819103:9829000:+	1
csi-miR166c	CP_B18g02110	1	-1	1	20	411	430	UCGGACCAGGCUUCAUUCCC	::.:::::::::::::::.	CGGGAUGAAGCCUGGUCCGG	Cleavage	locus=Chr18:32796467:32804508:-	1
csi-miR166c	CP_B18g01039	1	-1	1	20	555	574	UCGGACCAGGCUUCAUUCCC	::.:::::::::::::::.	UGGGAUGAAGCCUGGUCCGG	Cleavage	locus=Chr18:19637893:19644842:-	1
csi-miR166c	CP_A07g00847	1	-1	1	20	555	574	UCGGACCAGGCUUCAUUCCC	::.:::::::::::::::.	UGGGAUGAAGCCUGGUCCGG	Cleavage	locus=Chr07:14812677:14820385:+	1
csi-miR166c	CP_B20g00613	1	-1	1	20	555	574	UCGGACCAGGCUUCAUUCCC	::.:::::::::::::::.	UGGGAUGAAGCCUGGUCCGG	Cleavage	locus=Chr20:8204475:8211842:-	1
csi-miR166c	CP_A06g00792	1	-1	1	20	555	574	UCGGACCAGGCUUCAUUCCC	::.:::::::::::::::.	UGGGAUGAAGCCUGGUCCGG	Cleavage	locus=Chr06:9760801:9778666:+	1
csi-miR166d	CP_A06g00796	1	-1	1	21	554	574	UCGGACCAGGCUUCAUUCCCU	::.:::::::::::::::.	CUGGGAUGAAGCCUGGUCCGG	Cleavage	locus=Chr06:9819103:9829000:+	1
csi-miR166d	CP_B18g02110	1	-1	1	21	410	430	UCGGACCAGGCUUCAUUCCCU	::.:::::::::::::::.	CCGGGAUGAAGCCUGGUCCGG	Cleavage	locus=Chr18:32796467:32804508:-	1
csi-miR166d	CP_B18g01039	1	-1	1	21	554	574	UCGGACCAGGCUUCAUUCCCU	::.:::::::::::::::.	CUGGGAUGAAGCCUGGUCCGG	Cleavage	locus=Chr18:19637893:19644842:-	1
csi-miR166d	CP_A07g00847	1	-1	1	21	554	574	UCGGACCAGGCUUCAUUCCCU	::.:::::::::::::::.	CUGGGAUGAAGCCUGGUCCGG	Cleavage	locus=Chr07:14812677:14820385:+	1
csi-miR166d	CP_B20g00613	1	-1	1	21	554	574	UCGGACCAGGCUUCAUUCCCU	::.:::::::::::::::.	CUGGGAUGAAGCCUGGUCCGG	Cleavage	locus=Chr20:8204475:8211842:-	1
csi-miR166d	CP_A06g00792	1	-1	1	21	554	574	UCGGACCAGGCUUCAUUCCCU	::.:::::::::::::::.	CUGGGAUGAAGCCUGGUCCGG	Cleavage	locus=Chr06:9760801:9778666:+	1
csi-miR166d	CP_A09g00712	1	-1	1	21	539	559	UCGGACCAGGCUUCAUUCCCU	::.:::::::::::::::.	UUGGGAUGAAGCCUGGUCCGG	Cleavage	locus=Chr09:8933869:8939115:+	1
csi-miR166d	CP_B22g00189	1	-1	1	21	539	559	UCGGACCAGGCUUCAUUCCCU	::.:::::::::::::::.	UUGGGAUGAAGCCUGGUCCGG	Cleavage	locus=Chr22:2826280:2831512:+	1
csi-miR166e-3p	CP_B22g00189	1	-1	1	21	539	559	UCGGACCAGGCUUCAUUCCCC	::.:::::::::::::::.	UUGGGAUGAAGCCUGGUCCGG	Cleavage	locus=Chr22:2826280:2831512:+	1
csi-miR166e-3p	CP_A09g00712	1	-1	1	21	539	559	UCGGACCAGGCUUCAUUCCCC	::.:::::::::::::::.	UUGGGAUGAAGCCUGGUCCGG	Cleavage	locus=Chr09:8933869:8939115:+	1
csi-miR166e-3p	CP_B18g01039	1	-1	1	21	554	574	UCGGACCAGGCUUCAUUCCCC	::.:::::::::::::::.	CUGGGAUGAAGCCUGGUCCGG	Cleavage	locus=Chr18:19637893:19644842:-	1
csi-miR166e-3p	CP_A07g00847	1	-1	1	21	554	574	UCGGACCAGGCUUCAUUCCCC	::.:::::::::::::::.	CUGGGAUGAAGCCUGGUCCGG	Cleavage	locus=Chr07:14812677:14820385:+	1
csi-miR166e-3p	CP_B20g00613	1	-1	1	21	554	574	UCGGACCAGGCUUCAUUCCCC	::.:::::::::::::::.	CUGGGAUGAAGCCUGGUCCGG	Cleavage	locus=Chr20:8204475:8211842:-	1
csi-miR166e-3p	CP_A06g00796	1	-1	1	21	554	574	UCGGACCAGGCUUCAUUCCCC	::.:::::::::::::::.	CUGGGAUGAAGCCUGGUCCGG	Cleavage	locus=Chr06:9819103:9829000:+	1
csi-miR166e-3p	CP_A06g00792	1	-1	1	21	554	574	UCGGACCAGGCUUCAUUCCCC	::.:::::::::::::::.	CUGGGAUGAAGCCUGGUCCGG	Cleavage	locus=Chr06:9760801:9778666:+	1
csi-miR166e-3p	CP_B18g02110	1	-1	1	21	410	430	UCGGACCAGGCUUCAUUCCCC	::.:::::::::::::::.	CCGGGAUGAAGCCUGGUCCGG	Cleavage	locus=Chr18:32796467:32804508:-	1
ctr-miR166	CP_A06g00796	1	-1	1	22	553	574	UCGGACCAGGCUUCAUUCCCCC	::.:::::::::::::::.	CCUGGGAUGAAGCCUGGUCCGG	Cleavage	locus=Chr06:9819103:9829000:+	1
ctr-miR166	CP_B18g02110	1	-1	1	22	409	430	UCGGACCAGGCUUCAUUCCCCC	::.:::::::::::::::.	CCCGGGAUGAAGCCUGGUCCGG	Cleavage	locus=Chr18:32796467:32804508:-	1
ctr-miR166	CP_B18g01039	1	-1	1	22	553	574	UCGGACCAGGCUUCAUUCCCCC	::.:::::::::::::::.	CCUGGGAUGAAGCCUGGUCCGG	Cleavage	locus=Chr18:19637893:19644842:-	1
ctr-miR166	CP_A07g00847	1	-1	1	22	553	574	UCGGACCAGGCUUCAUUCCCCC	::.:::::::::::::::.	CCUGGGAUGAAGCCUGGUCCGG	Cleavage	locus=Chr07:14812677:14820385:+	1
ctr-miR166	CP_B20g00613	1	-1	1	22	553	574	UCGGACCAGGCUUCAUUCCCCC	::.:::::::::::::::.	CCUGGGAUGAAGCCUGGUCCGG	Cleavage	locus=Chr20:8204475:8211842:-	1
ctr-miR166	CP_A09g00712	1	-1	1	22	538	559	UCGGACCAGGCUUCAUUCCCCC	::.:::::::::::::::.	CUUGGGAUGAAGCCUGGUCCGG	Cleavage	locus=Chr09:8933869:8939115:+	1
ctr-miR166	CP_B22g00189	1	-1	1	22	538	559	UCGGACCAGGCUUCAUUCCCCC	::.:::::::::::::::.	CUUGGGAUGAAGCCUGGUCCGG	Cleavage	locus=Chr22:2826280:2831512:+	1
ctr-miR166	CP_A06g00792	1	-1	1	22	553	574	UCGGACCAGGCUUCAUUCCCCC	::.:::::::::::::::.	CCUGGGAUGAAGCCUGGUCCGG	Cleavage	locus=Chr06:9760801:9778666:+	1
dpr-miR166a	CP_A06g00792	1	-1	1	21	554	574	UCGGACCAGGCUUCAUUCCUC	::.:::::::::::::::.	CUGGGAUGAAGCCUGGUCCGG	Cleavage	locus=Chr06:9760801:9778666:+	1
dpr-miR166a	CP_B18g02110	1	-1	1	21	410	430	UCGGACCAGGCUUCAUUCCUC	::.:::::::::::::::.	CCGGGAUGAAGCCUGGUCCGG	Cleavage	locus=Chr18:32796467:32804508:-	1
dpr-miR166a	CP_B18g01039	1	-1	1	21	554	574	UCGGACCAGGCUUCAUUCCUC	::.:::::::::::::::.	CUGGGAUGAAGCCUGGUCCGG	Cleavage	locus=Chr18:19637893:19644842:-	1
dpr-miR166a	CP_A07g00847	1	-1	1	21	554	574	UCGGACCAGGCUUCAUUCCUC	::.:::::::::::::::.	CUGGGAUGAAGCCUGGUCCGG	Cleavage	locus=Chr07:14812677:14820385:+	1
dpr-miR166a	CP_B20g00613	1	-1	1	21	554	574	UCGGACCAGGCUUCAUUCCUC	::.:::::::::::::::.	CUGGGAUGAAGCCUGGUCCGG	Cleavage	locus=Chr20:8204475:8211842:-	1
dpr-miR166a	CP_A09g00712	1	-1	1	21	539	559	UCGGACCAGGCUUCAUUCCUC	::.:::::::::::::::.	UUGGGAUGAAGCCUGGUCCGG	Cleavage	locus=Chr09:8933869:8939115:+	1
dpr-miR166a	CP_B22g00189	1	-1	1	21	539	559	UCGGACCAGGCUUCAUUCCUC	::.:::::::::::::::.	UUGGGAUGAAGCCUGGUCCGG	Cleavage	locus=Chr22:2826280:2831512:+	1
dpr-miR166a	CP_A06g00796	1	-1	1	21	554	574	UCGGACCAGGCUUCAUUCCUC	::.:::::::::::::::.	CUGGGAUGAAGCCUGGUCCGG	Cleavage	locus=Chr06:9819103:9829000:+	1
dpr-miR166b	CP_A07g00847	1	-1	1	21	554	574	UCGGACCAGGCUUCAUUCCCC	::.:::::::::::::::.	CUGGGAUGAAGCCUGGUCCGG	Cleavage	locus=Chr07:14812677:14820385:+	1
dpr-miR166b	CP_B18g01039	1	-1	1	21	554	574	UCGGACCAGGCUUCAUUCCCC	::.:::::::::::::::.	CUGGGAUGAAGCCUGGUCCGG	Cleavage	locus=Chr18:19637893:19644842:-	1
dpr-miR166b	CP_B20g00613	1	-1	1	21	554	574	UCGGACCAGGCUUCAUUCCCC	::.:::::::::::::::.	CUGGGAUGAAGCCUGGUCCGG	Cleavage	locus=Chr20:8204475:8211842:-	1
dpr-miR166b	CP_A09g00712	1	-1	1	21	539	559	UCGGACCAGGCUUCAUUCCCC	::.:::::::::::::::.	UUGGGAUGAAGCCUGGUCCGG	Cleavage	locus=Chr09:8933869:8939115:+	1
dpr-miR166b	CP_B22g00189	1	-1	1	21	539	559	UCGGACCAGGCUUCAUUCCCC	::.:::::::::::::::.	UUGGGAUGAAGCCUGGUCCGG	Cleavage	locus=Chr22:2826280:2831512:+	1
dpr-miR166b	CP_A06g00792	1	-1	1	21	554	574	UCGGACCAGGCUUCAUUCCCC	::.:::::::::::::::.	CUGGGAUGAAGCCUGGUCCGG	Cleavage	locus=Chr06:9760801:9778666:+	1
dpr-miR166b	CP_A06g00796	1	-1	1	21	554	574	UCGGACCAGGCUUCAUUCCCC	::.:::::::::::::::.	CUGGGAUGAAGCCUGGUCCGG	Cleavage	locus=Chr06:9819103:9829000:+	1
dpr-miR166b	CP_B18g02110	1	-1	1	21	410	430	UCGGACCAGGCUUCAUUCCCC	::.:::::::::::::::.	CCGGGAUGAAGCCUGGUCCGG	Cleavage	locus=Chr18:32796467:32804508:-	1
ghr-miR166b	CP_B22g00189	1	-1	1	21	539	559	UCGGACCAGGCUUCAUUCCCC	::.:::::::::::::::.	UUGGGAUGAAGCCUGGUCCGG	Cleavage	locus=Chr22:2826280:2831512:+	1
ghr-miR166b	CP_A09g00712	1	-1	1	21	539	559	UCGGACCAGGCUUCAUUCCCC	::.:::::::::::::::.	UUGGGAUGAAGCCUGGUCCGG	Cleavage	locus=Chr09:8933869:8939115:+	1
ghr-miR166b	CP_A06g00796	1	-1	1	21	554	574	UCGGACCAGGCUUCAUUCCCC	::.:::::::::::::::.	CUGGGAUGAAGCCUGGUCCGG	Cleavage	locus=Chr06:9819103:9829000:+	1
ghr-miR166b	CP_B18g02110	1	-1	1	21	410	430	UCGGACCAGGCUUCAUUCCCC	::.:::::::::::::::.	CCGGGAUGAAGCCUGGUCCGG	Cleavage	locus=Chr18:32796467:32804508:-	1
ghr-miR166b	CP_B18g01039	1	-1	1	21	554	574	UCGGACCAGGCUUCAUUCCCC	::.:::::::::::::::.	CUGGGAUGAAGCCUGGUCCGG	Cleavage	locus=Chr18:19637893:19644842:-	1
ghr-miR166b	CP_A07g00847	1	-1	1	21	554	574	UCGGACCAGGCUUCAUUCCCC	::.:::::::::::::::.	CUGGGAUGAAGCCUGGUCCGG	Cleavage	locus=Chr07:14812677:14820385:+	1
ghr-miR166b	CP_B20g00613	1	-1	1	21	554	574	UCGGACCAGGCUUCAUUCCCC	::.:::::::::::::::.	CUGGGAUGAAGCCUGGUCCGG	Cleavage	locus=Chr20:8204475:8211842:-	1
ghr-miR166b	CP_A06g00792	1	-1	1	21	554	574	UCGGACCAGGCUUCAUUCCCC	::.:::::::::::::::.	CUGGGAUGAAGCCUGGUCCGG	Cleavage	locus=Chr06:9760801:9778666:+	1
gma-miR166a-3p	CP_A06g00796	1	-1	1	21	554	574	UCGGACCAGGCUUCAUUCCCC	::.:::::::::::::::.	CUGGGAUGAAGCCUGGUCCGG	Cleavage	locus=Chr06:9819103:9829000:+	1
gma-miR166a-3p	CP_B18g02110	1	-1	1	21	410	430	UCGGACCAGGCUUCAUUCCCC	::.:::::::::::::::.	CCGGGAUGAAGCCUGGUCCGG	Cleavage	locus=Chr18:32796467:32804508:-	1
gma-miR166a-3p	CP_B18g01039	1	-1	1	21	554	574	UCGGACCAGGCUUCAUUCCCC	::.:::::::::::::::.	CUGGGAUGAAGCCUGGUCCGG	Cleavage	locus=Chr18:19637893:19644842:-	1
gma-miR166a-3p	CP_A07g00847	1	-1	1	21	554	574	UCGGACCAGGCUUCAUUCCCC	::.:::::::::::::::.	CUGGGAUGAAGCCUGGUCCGG	Cleavage	locus=Chr07:14812677:14820385:+	1
gma-miR166a-3p	CP_B20g00613	1	-1	1	21	554	574	UCGGACCAGGCUUCAUUCCCC	::.:::::::::::::::.	CUGGGAUGAAGCCUGGUCCGG	Cleavage	locus=Chr20:8204475:8211842:-	1
gma-miR166a-3p	CP_A09g00712	1	-1	1	21	539	559	UCGGACCAGGCUUCAUUCCCC	::.:::::::::::::::.	UUGGGAUGAAGCCUGGUCCGG	Cleavage	locus=Chr09:8933869:8939115:+	1
gma-miR166a-3p	CP_B22g00189	1	-1	1	21	539	559	UCGGACCAGGCUUCAUUCCCC	::.:::::::::::::::.	UUGGGAUGAAGCCUGGUCCGG	Cleavage	locus=Chr22:2826280:2831512:+	1
gma-miR166a-3p	CP_A06g00792	1	-1	1	21	554	574	UCGGACCAGGCUUCAUUCCCC	::.:::::::::::::::.	CUGGGAUGAAGCCUGGUCCGG	Cleavage	locus=Chr06:9760801:9778666:+	1
gma-miR166b	CP_B18g02110	1	-1	1	21	410	430	UCGGACCAGGCUUCAUUCCCC	::.:::::::::::::::.	CCGGGAUGAAGCCUGGUCCGG	Cleavage	locus=Chr18:32796467:32804508:-	1
gma-miR166b	CP_B22g00189	1	-1	1	21	539	559	UCGGACCAGGCUUCAUUCCCC	::.:::::::::::::::.	UUGGGAUGAAGCCUGGUCCGG	Cleavage	locus=Chr22:2826280:2831512:+	1
gma-miR166b	CP_A06g00792	1	-1	1	21	554	574	UCGGACCAGGCUUCAUUCCCC	::.:::::::::::::::.	CUGGGAUGAAGCCUGGUCCGG	Cleavage	locus=Chr06:9760801:9778666:+	1
gma-miR166b	CP_A09g00712	1	-1	1	21	539	559	UCGGACCAGGCUUCAUUCCCC	::.:::::::::::::::.	UUGGGAUGAAGCCUGGUCCGG	Cleavage	locus=Chr09:8933869:8939115:+	1
gma-miR166b	CP_B18g01039	1	-1	1	21	554	574	UCGGACCAGGCUUCAUUCCCC	::.:::::::::::::::.	CUGGGAUGAAGCCUGGUCCGG	Cleavage	locus=Chr18:19637893:19644842:-	1
gma-miR166b	CP_B20g00613	1	-1	1	21	554	574	UCGGACCAGGCUUCAUUCCCC	::.:::::::::::::::.	CUGGGAUGAAGCCUGGUCCGG	Cleavage	locus=Chr20:8204475:8211842:-	1
gma-miR166b	CP_A07g00847	1	-1	1	21	554	574	UCGGACCAGGCUUCAUUCCCC	::.:::::::::::::::.	CUGGGAUGAAGCCUGGUCCGG	Cleavage	locus=Chr07:14812677:14820385:+	1
gma-miR166b	CP_A06g00796	1	-1	1	21	554	574	UCGGACCAGGCUUCAUUCCCC	::.:::::::::::::::.	CUGGGAUGAAGCCUGGUCCGG	Cleavage	locus=Chr06:9819103:9829000:+	1
gma-miR166c-3p	CP_B22g00189	1	-1	1	21	539	559	UCGGACCAGGCUUCAUUCCCC	::.:::::::::::::::.	UUGGGAUGAAGCCUGGUCCGG	Cleavage	locus=Chr22:2826280:2831512:+	1
gma-miR166c-3p	CP_A09g00712	1	-1	1	21	539	559	UCGGACCAGGCUUCAUUCCCC	::.:::::::::::::::.	UUGGGAUGAAGCCUGGUCCGG	Cleavage	locus=Chr09:8933869:8939115:+	1
gma-miR166c-3p	CP_A06g00792	1	-1	1	21	554	574	UCGGACCAGGCUUCAUUCCCC	::.:::::::::::::::.	CUGGGAUGAAGCCUGGUCCGG	Cleavage	locus=Chr06:9760801:9778666:+	1
gma-miR166c-3p	CP_A06g00796	1	-1	1	21	554	574	UCGGACCAGGCUUCAUUCCCC	::.:::::::::::::::.	CUGGGAUGAAGCCUGGUCCGG	Cleavage	locus=Chr06:9819103:9829000:+	1
gma-miR166c-3p	CP_B18g02110	1	-1	1	21	410	430	UCGGACCAGGCUUCAUUCCCC	::.:::::::::::::::.	CCGGGAUGAAGCCUGGUCCGG	Cleavage	locus=Chr18:32796467:32804508:-	1
gma-miR166c-3p	CP_B18g01039	1	-1	1	21	554	574	UCGGACCAGGCUUCAUUCCCC	::.:::::::::::::::.	CUGGGAUGAAGCCUGGUCCGG	Cleavage	locus=Chr18:19637893:19644842:-	1
gma-miR166c-3p	CP_B20g00613	1	-1	1	21	554	574	UCGGACCAGGCUUCAUUCCCC	::.:::::::::::::::.	CUGGGAUGAAGCCUGGUCCGG	Cleavage	locus=Chr20:8204475:8211842:-	1
gma-miR166c-3p	CP_A07g00847	1	-1	1	21	554	574	UCGGACCAGGCUUCAUUCCCC	::.:::::::::::::::.	CUGGGAUGAAGCCUGGUCCGG	Cleavage	locus=Chr07:14812677:14820385:+	1
gma-miR166d	CP_A06g00796	1	-1	1	21	554	574	UCGGACCAGGCUUCAUUCCCC	::.:::::::::::::::.	CUGGGAUGAAGCCUGGUCCGG	Cleavage	locus=Chr06:9819103:9829000:+	1
gma-miR166d	CP_A09g00712	1	-1	1	21	539	559	UCGGACCAGGCUUCAUUCCCC	::.:::::::::::::::.	UUGGGAUGAAGCCUGGUCCGG	Cleavage	locus=Chr09:8933869:8939115:+	1
gma-miR166d	CP_B22g00189	1	-1	1	21	539	559	UCGGACCAGGCUUCAUUCCCC	::.:::::::::::::::.	UUGGGAUGAAGCCUGGUCCGG	Cleavage	locus=Chr22:2826280:2831512:+	1
gma-miR166d	CP_A06g00792	1	-1	1	21	554	574	UCGGACCAGGCUUCAUUCCCC	::.:::::::::::::::.	CUGGGAUGAAGCCUGGUCCGG	Cleavage	locus=Chr06:9760801:9778666:+	1
gma-miR166d	CP_B18g02110	1	-1	1	21	410	430	UCGGACCAGGCUUCAUUCCCC	::.:::::::::::::::.	CCGGGAUGAAGCCUGGUCCGG	Cleavage	locus=Chr18:32796467:32804508:-	1
gma-miR166d	CP_B18g01039	1	-1	1	21	554	574	UCGGACCAGGCUUCAUUCCCC	::.:::::::::::::::.	CUGGGAUGAAGCCUGGUCCGG	Cleavage	locus=Chr18:19637893:19644842:-	1
gma-miR166d	CP_B20g00613	1	-1	1	21	554	574	UCGGACCAGGCUUCAUUCCCC	::.:::::::::::::::.	CUGGGAUGAAGCCUGGUCCGG	Cleavage	locus=Chr20:8204475:8211842:-	1
gma-miR166d	CP_A07g00847	1	-1	1	21	554	574	UCGGACCAGGCUUCAUUCCCC	::.:::::::::::::::.	CUGGGAUGAAGCCUGGUCCGG	Cleavage	locus=Chr07:14812677:14820385:+	1
gma-miR166e	CP_A06g00792	1	-1	1	21	554	574	UCGGACCAGGCUUCAUUCCCC	::.:::::::::::::::.	CUGGGAUGAAGCCUGGUCCGG	Cleavage	locus=Chr06:9760801:9778666:+	1
gma-miR166e	CP_A09g00712	1	-1	1	21	539	559	UCGGACCAGGCUUCAUUCCCC	::.:::::::::::::::.	UUGGGAUGAAGCCUGGUCCGG	Cleavage	locus=Chr09:8933869:8939115:+	1
gma-miR166e	CP_B22g00189	1	-1	1	21	539	559	UCGGACCAGGCUUCAUUCCCC	::.:::::::::::::::.	UUGGGAUGAAGCCUGGUCCGG	Cleavage	locus=Chr22:2826280:2831512:+	1
gma-miR166e	CP_A06g00796	1	-1	1	21	554	574	UCGGACCAGGCUUCAUUCCCC	::.:::::::::::::::.	CUGGGAUGAAGCCUGGUCCGG	Cleavage	locus=Chr06:9819103:9829000:+	1
gma-miR166e	CP_B18g02110	1	-1	1	21	410	430	UCGGACCAGGCUUCAUUCCCC	::.:::::::::::::::.	CCGGGAUGAAGCCUGGUCCGG	Cleavage	locus=Chr18:32796467:32804508:-	1
gma-miR166e	CP_B18g01039	1	-1	1	21	554	574	UCGGACCAGGCUUCAUUCCCC	::.:::::::::::::::.	CUGGGAUGAAGCCUGGUCCGG	Cleavage	locus=Chr18:19637893:19644842:-	1
gma-miR166e	CP_B20g00613	1	-1	1	21	554	574	UCGGACCAGGCUUCAUUCCCC	::.:::::::::::::::.	CUGGGAUGAAGCCUGGUCCGG	Cleavage	locus=Chr20:8204475:8211842:-	1
gma-miR166e	CP_A07g00847	1	-1	1	21	554	574	UCGGACCAGGCUUCAUUCCCC	::.:::::::::::::::.	CUGGGAUGAAGCCUGGUCCGG	Cleavage	locus=Chr07:14812677:14820385:+	1
gma-miR166f	CP_B18g02110	1	-1	1	21	410	430	UCGGACCAGGCUUCAUUCCCC	::.:::::::::::::::.	CCGGGAUGAAGCCUGGUCCGG	Cleavage	locus=Chr18:32796467:32804508:-	1
gma-miR166f	CP_A07g00847	1	-1	1	21	554	574	UCGGACCAGGCUUCAUUCCCC	::.:::::::::::::::.	CUGGGAUGAAGCCUGGUCCGG	Cleavage	locus=Chr07:14812677:14820385:+	1
gma-miR166f	CP_B18g01039	1	-1	1	21	554	574	UCGGACCAGGCUUCAUUCCCC	::.:::::::::::::::.	CUGGGAUGAAGCCUGGUCCGG	Cleavage	locus=Chr18:19637893:19644842:-	1
gma-miR166f	CP_B20g00613	1	-1	1	21	554	574	UCGGACCAGGCUUCAUUCCCC	::.:::::::::::::::.	CUGGGAUGAAGCCUGGUCCGG	Cleavage	locus=Chr20:8204475:8211842:-	1
gma-miR166f	CP_B22g00189	1	-1	1	21	539	559	UCGGACCAGGCUUCAUUCCCC	::.:::::::::::::::.	UUGGGAUGAAGCCUGGUCCGG	Cleavage	locus=Chr22:2826280:2831512:+	1
gma-miR166f	CP_A09g00712	1	-1	1	21	539	559	UCGGACCAGGCUUCAUUCCCC	::.:::::::::::::::.	UUGGGAUGAAGCCUGGUCCGG	Cleavage	locus=Chr09:8933869:8939115:+	1
gma-miR166f	CP_A06g00792	1	-1	1	21	554	574	UCGGACCAGGCUUCAUUCCCC	::.:::::::::::::::.	CUGGGAUGAAGCCUGGUCCGG	Cleavage	locus=Chr06:9760801:9778666:+	1
gma-miR166f	CP_A06g00796	1	-1	1	21	554	574	UCGGACCAGGCUUCAUUCCCC	::.:::::::::::::::.	CUGGGAUGAAGCCUGGUCCGG	Cleavage	locus=Chr06:9819103:9829000:+	1
gma-miR166g	CP_A06g00796	1	-1	1	21	554	574	UCGGACCAGGCUUCAUUCCCC	::.:::::::::::::::.	CUGGGAUGAAGCCUGGUCCGG	Cleavage	locus=Chr06:9819103:9829000:+	1
gma-miR166g	CP_B18g02110	1	-1	1	21	410	430	UCGGACCAGGCUUCAUUCCCC	::.:::::::::::::::.	CCGGGAUGAAGCCUGGUCCGG	Cleavage	locus=Chr18:32796467:32804508:-	1
gma-miR166g	CP_A09g00712	1	-1	1	21	539	559	UCGGACCAGGCUUCAUUCCCC	::.:::::::::::::::.	UUGGGAUGAAGCCUGGUCCGG	Cleavage	locus=Chr09:8933869:8939115:+	1
gma-miR166g	CP_B22g00189	1	-1	1	21	539	559	UCGGACCAGGCUUCAUUCCCC	::.:::::::::::::::.	UUGGGAUGAAGCCUGGUCCGG	Cleavage	locus=Chr22:2826280:2831512:+	1
gma-miR166g	CP_A06g00792	1	-1	1	21	554	574	UCGGACCAGGCUUCAUUCCCC	::.:::::::::::::::.	CUGGGAUGAAGCCUGGUCCGG	Cleavage	locus=Chr06:9760801:9778666:+	1
gma-miR166g	CP_B18g01039	1	-1	1	21	554	574	UCGGACCAGGCUUCAUUCCCC	::.:::::::::::::::.	CUGGGAUGAAGCCUGGUCCGG	Cleavage	locus=Chr18:19637893:19644842:-	1
gma-miR166g	CP_B20g00613	1	-1	1	21	554	574	UCGGACCAGGCUUCAUUCCCC	::.:::::::::::::::.	CUGGGAUGAAGCCUGGUCCGG	Cleavage	locus=Chr20:8204475:8211842:-	1
gma-miR166g	CP_A07g00847	1	-1	1	21	554	574	UCGGACCAGGCUUCAUUCCCC	::.:::::::::::::::.	CUGGGAUGAAGCCUGGUCCGG	Cleavage	locus=Chr07:14812677:14820385:+	1
gma-miR166i-3p	CP_A06g00796	1	-1	1	21	554	574	UCGGACCAGGCUUCAUUCCCC	::.:::::::::::::::.	CUGGGAUGAAGCCUGGUCCGG	Cleavage	locus=Chr06:9819103:9829000:+	1
gma-miR166i-3p	CP_B18g02110	1	-1	1	21	410	430	UCGGACCAGGCUUCAUUCCCC	::.:::::::::::::::.	CCGGGAUGAAGCCUGGUCCGG	Cleavage	locus=Chr18:32796467:32804508:-	1
gma-miR166i-3p	CP_B18g01039	1	-1	1	21	554	574	UCGGACCAGGCUUCAUUCCCC	::.:::::::::::::::.	CUGGGAUGAAGCCUGGUCCGG	Cleavage	locus=Chr18:19637893:19644842:-	1
gma-miR166i-3p	CP_A07g00847	1	-1	1	21	554	574	UCGGACCAGGCUUCAUUCCCC	::.:::::::::::::::.	CUGGGAUGAAGCCUGGUCCGG	Cleavage	locus=Chr07:14812677:14820385:+	1
gma-miR166i-3p	CP_B20g00613	1	-1	1	21	554	574	UCGGACCAGGCUUCAUUCCCC	::.:::::::::::::::.	CUGGGAUGAAGCCUGGUCCGG	Cleavage	locus=Chr20:8204475:8211842:-	1
gma-miR166i-3p	CP_A09g00712	1	-1	1	21	539	559	UCGGACCAGGCUUCAUUCCCC	::.:::::::::::::::.	UUGGGAUGAAGCCUGGUCCGG	Cleavage	locus=Chr09:8933869:8939115:+	1
gma-miR166i-3p	CP_B22g00189	1	-1	1	21	539	559	UCGGACCAGGCUUCAUUCCCC	::.:::::::::::::::.	UUGGGAUGAAGCCUGGUCCGG	Cleavage	locus=Chr22:2826280:2831512:+	1
gma-miR166i-3p	CP_A06g00792	1	-1	1	21	554	574	UCGGACCAGGCUUCAUUCCCC	::.:::::::::::::::.	CUGGGAUGAAGCCUGGUCCGG	Cleavage	locus=Chr06:9760801:9778666:+	1
gma-miR166j-3p	CP_B18g02110	1	-1	1	21	410	430	UCGGACCAGGCUUCAUUCCCG	: ::.:::::::::::::::.	CCGGGAUGAAGCCUGGUCCGG	Cleavage	locus=Chr18:32796467:32804508:-	1
gma-miR166j-3p	CP_A07g00847	1	-1	1	21	554	574	UCGGACCAGGCUUCAUUCCCG	: ::.:::::::::::::::.	CUGGGAUGAAGCCUGGUCCGG	Cleavage	locus=Chr07:14812677:14820385:+	1
gma-miR166j-3p	CP_B18g01039	1	-1	1	21	554	574	UCGGACCAGGCUUCAUUCCCG	: ::.:::::::::::::::.	CUGGGAUGAAGCCUGGUCCGG	Cleavage	locus=Chr18:19637893:19644842:-	1
gma-miR166j-3p	CP_B20g00613	1	-1	1	21	554	574	UCGGACCAGGCUUCAUUCCCG	: ::.:::::::::::::::.	CUGGGAUGAAGCCUGGUCCGG	Cleavage	locus=Chr20:8204475:8211842:-	1
gma-miR166j-3p	CP_A06g00792	1	-1	1	21	554	574	UCGGACCAGGCUUCAUUCCCG	: ::.:::::::::::::::.	CUGGGAUGAAGCCUGGUCCGG	Cleavage	locus=Chr06:9760801:9778666:+	1
gma-miR166j-3p	CP_A06g00796	1	-1	1	21	554	574	UCGGACCAGGCUUCAUUCCCG	: ::.:::::::::::::::.	CUGGGAUGAAGCCUGGUCCGG	Cleavage	locus=Chr06:9819103:9829000:+	1
gma-miR166j-3p	CP_A09g00712	1	-1	1	21	539	559	UCGGACCAGGCUUCAUUCCCG	::.:::::::::::::::.	UUGGGAUGAAGCCUGGUCCGG	Cleavage	locus=Chr09:8933869:8939115:+	1
gma-miR166j-3p	CP_B22g00189	1	-1	1	21	539	559	UCGGACCAGGCUUCAUUCCCG	::.:::::::::::::::.	UUGGGAUGAAGCCUGGUCCGG	Cleavage	locus=Chr22:2826280:2831512:+	1
gma-miR166n	CP_B18g02110	1	-1	1	21	410	430	UCGGACCAGGCUUCAUUCCCC	::.:::::::::::::::.	CCGGGAUGAAGCCUGGUCCGG	Cleavage	locus=Chr18:32796467:32804508:-	1
gma-miR166n	CP_A07g00847	1	-1	1	21	554	574	UCGGACCAGGCUUCAUUCCCC	::.:::::::::::::::.	CUGGGAUGAAGCCUGGUCCGG	Cleavage	locus=Chr07:14812677:14820385:+	1
gma-miR166n	CP_B18g01039	1	-1	1	21	554	574	UCGGACCAGGCUUCAUUCCCC	::.:::::::::::::::.	CUGGGAUGAAGCCUGGUCCGG	Cleavage	locus=Chr18:19637893:19644842:-	1
gma-miR166n	CP_B20g00613	1	-1	1	21	554	574	UCGGACCAGGCUUCAUUCCCC	::.:::::::::::::::.	CUGGGAUGAAGCCUGGUCCGG	Cleavage	locus=Chr20:8204475:8211842:-	1
gma-miR166n	CP_B22g00189	1	-1	1	21	539	559	UCGGACCAGGCUUCAUUCCCC	::.:::::::::::::::.	UUGGGAUGAAGCCUGGUCCGG	Cleavage	locus=Chr22:2826280:2831512:+	1
gma-miR166n	CP_A09g00712	1	-1	1	21	539	559	UCGGACCAGGCUUCAUUCCCC	::.:::::::::::::::.	UUGGGAUGAAGCCUGGUCCGG	Cleavage	locus=Chr09:8933869:8939115:+	1
gma-miR166n	CP_A06g00792	1	-1	1	21	554	574	UCGGACCAGGCUUCAUUCCCC	::.:::::::::::::::.	CUGGGAUGAAGCCUGGUCCGG	Cleavage	locus=Chr06:9760801:9778666:+	1
gma-miR166n	CP_A06g00796	1	-1	1	21	554	574	UCGGACCAGGCUUCAUUCCCC	::.:::::::::::::::.	CUGGGAUGAAGCCUGGUCCGG	Cleavage	locus=Chr06:9819103:9829000:+	1
gma-miR166o	CP_B18g02110	1	-1	1	21	410	430	UCGGACCAGGCUUCAUUCCCC	::.:::::::::::::::.	CCGGGAUGAAGCCUGGUCCGG	Cleavage	locus=Chr18:32796467:32804508:-	1
gma-miR166o	CP_B22g00189	1	-1	1	21	539	559	UCGGACCAGGCUUCAUUCCCC	::.:::::::::::::::.	UUGGGAUGAAGCCUGGUCCGG	Cleavage	locus=Chr22:2826280:2831512:+	1
gma-miR166o	CP_A09g00712	1	-1	1	21	539	559	UCGGACCAGGCUUCAUUCCCC	::.:::::::::::::::.	UUGGGAUGAAGCCUGGUCCGG	Cleavage	locus=Chr09:8933869:8939115:+	1
gma-miR166o	CP_A06g00796	1	-1	1	21	554	574	UCGGACCAGGCUUCAUUCCCC	::.:::::::::::::::.	CUGGGAUGAAGCCUGGUCCGG	Cleavage	locus=Chr06:9819103:9829000:+	1
gma-miR166o	CP_B18g01039	1	-1	1	21	554	574	UCGGACCAGGCUUCAUUCCCC	::.:::::::::::::::.	CUGGGAUGAAGCCUGGUCCGG	Cleavage	locus=Chr18:19637893:19644842:-	1
gma-miR166o	CP_A07g00847	1	-1	1	21	554	574	UCGGACCAGGCUUCAUUCCCC	::.:::::::::::::::.	CUGGGAUGAAGCCUGGUCCGG	Cleavage	locus=Chr07:14812677:14820385:+	1
gma-miR166o	CP_B20g00613	1	-1	1	21	554	574	UCGGACCAGGCUUCAUUCCCC	::.:::::::::::::::.	CUGGGAUGAAGCCUGGUCCGG	Cleavage	locus=Chr20:8204475:8211842:-	1
gma-miR166o	CP_A06g00792	1	-1	1	21	554	574	UCGGACCAGGCUUCAUUCCCC	::.:::::::::::::::.	CUGGGAUGAAGCCUGGUCCGG	Cleavage	locus=Chr06:9760801:9778666:+	1
gma-miR166p	CP_A07g00847	1	-1	1	20	555	574	UCGGACCAGGCUUCAUUCCC	::.:::::::::::::::.	UGGGAUGAAGCCUGGUCCGG	Cleavage	locus=Chr07:14812677:14820385:+	1
gma-miR166p	CP_B18g01039	1	-1	1	20	555	574	UCGGACCAGGCUUCAUUCCC	::.:::::::::::::::.	UGGGAUGAAGCCUGGUCCGG	Cleavage	locus=Chr18:19637893:19644842:-	1
gma-miR166p	CP_B20g00613	1	-1	1	20	555	574	UCGGACCAGGCUUCAUUCCC	::.:::::::::::::::.	UGGGAUGAAGCCUGGUCCGG	Cleavage	locus=Chr20:8204475:8211842:-	1
gma-miR166p	CP_A06g00792	1	-1	1	20	555	574	UCGGACCAGGCUUCAUUCCC	::.:::::::::::::::.	UGGGAUGAAGCCUGGUCCGG	Cleavage	locus=Chr06:9760801:9778666:+	1
gma-miR166p	CP_A06g00796	1	-1	1	20	555	574	UCGGACCAGGCUUCAUUCCC	::.:::::::::::::::.	UGGGAUGAAGCCUGGUCCGG	Cleavage	locus=Chr06:9819103:9829000:+	1
gma-miR166p	CP_A09g00712	1	-1	1	20	540	559	UCGGACCAGGCUUCAUUCCC	::.:::::::::::::::.	UGGGAUGAAGCCUGGUCCGG	Cleavage	locus=Chr09:8933869:8939115:+	1
gma-miR166p	CP_B22g00189	1	-1	1	20	540	559	UCGGACCAGGCUUCAUUCCC	::.:::::::::::::::.	UGGGAUGAAGCCUGGUCCGG	Cleavage	locus=Chr22:2826280:2831512:+	1
[truncated: 8,420 more rows]
