# Supplementary material for: Genome-wide characterization and expression profiling of the HD-ZIP gene family in Acoraceae under salinity and cold stress
Source: Front Plant Sci. 2024 Apr 26;15:1372580. doi: 10.3389/fpls.2024.1372580 (PMC11082295; doi:10.3389/fpls.2024.1372580)
Supplement: Supplementary file 4 [file Table_3.xlsx]

## Sheet: Ac. gramineus
ID	Type	Sequence	Starting site	Ending site		Species	Function
DACA000653	G-box	TACGTG	1392	6	-	Arabidopsis thaliana	auxin-responsive element
DACA000653	G-box	CAGACGTGGCA	1443	10	+	Nicotiana plumbaginifolia	light responsive element
DACA000653	ABRE	ACGTG	1392	5	-	Arabidopsis thaliana	abscisic acid responsiveness
DACA000653	ABRE	ACGTG	1563	5	+	Arabidopsis thaliana	abscisic acid responsiveness
DACA000653	TGACG-motif	TGACG	1745	5	-	Hordeum vulgare	MeJA-responsiveness
DACA000653	TGACG-motif	TGACG	1759	5	-	Hordeum vulgare	MeJA-responsiveness
DACA000653	Sp1	GGGCGG	1494	6	+	Oryza sativa	light responsive element
DACA000653	CGTCA-motif	CGTCA	1745	5	+	Hordeum vulgare	MeJA-responsiveness
DACA000653	CGTCA-motif	CGTCA	1759	5	+	Hordeum vulgare	MeJA-responsiveness
DACA000653	GARE-motif	TCTGTTG	691	7	+	Brassica oleracea	gibberellin-responsive element
DACA000653	G-Box	CACGTT	1562	6	-	Pisum sativum	light responsive element
DACA000653	TCA-element	CCATCTTTTT	493	9	+	Nicotiana tabacum	salicylic acid responsiveness
DACA000653	TGA-element	AACGAC	539	6	-	Brassica oleracea	auxin-responsive element
DACA000653	TGA-element	AACGAC	1772	6	+	Brassica oleracea	auxin-responsive element
DACA000653	GC-motif	CCCCCG	889	6	+	Zea mays	anoxic specific inducibility
DACA000653	AE-box	AGAAACTT	777	8	-	Arabidopsis thaliana	light responsive element
DACA000927	O2-site	GATGATGTGG	965	9	+	Zea mays	zein metabolism regulation
DACA000927	O2-site	GATGATGTGG	1014	9	+	Zea mays	zein metabolism regulation
DACA000927	ATCT-motif	AATCTAATCC	141	9	+	Pisum sativum	light responsive element
DACA000927	ATCT-motif	AATCTAATCC	1601	9	-	Pisum sativum	light responsive element
DACA000927	GATA-motif	AAGATAAGATT	1800	10	+	Arabidopsis thaliana	light responsive element
DACA000927	GATA-motif	AAGATAAGATT	1928	10	+	Arabidopsis thaliana	light responsive element
DACA000927	ARE	AAACCA	42	6	-	Zea mays	anaerobic induction
DACA000927	ARE	AAACCA	1368	6	-	Zea mays	anaerobic induction
DACA000927	ARE	AAACCA	1971	6	-	Zea mays	anaerobic induction
DACA000927	TCT-motif	TCTTAC	1398	6	-	Arabidopsis thaliana	light responsive element
DACA000927	CGTCA-motif	CGTCA	244	5	-	Hordeum vulgare	MeJA-responsiveness
DACA000927	TGACG-motif	TGACG	244	5	+	Hordeum vulgare	MeJA-responsiveness
DACA000927	TATC-box	TATCCCA	10	7	-	Oryza sativa	gibberellin-responsive element
DACA000927	Box 4	ATTAAT	816	6	+	Petroselinum crispum	light responsive element
DACA000927	AE-box	AGAAACTT	1277	8	-	Arabidopsis thaliana	light responsive element
DACA000928	Box 4	ATTAAT	248	6	+	Petroselinum crispum	light responsive element
DACA000928	Box 4	ATTAAT	752	6	+	Petroselinum crispum	light responsive element
DACA000928	Box 4	ATTAAT	1561	6	-	Petroselinum crispum	light responsive element
DACA000928	Box 4	ATTAAT	1847	6	-	Petroselinum crispum	light responsive element
DACA000928	ATC-motif	AGTAATCT	1788	8	+	Spinacia oleracea	light responsive element
DACA000928	G-Box	CACGTG	61	6	+	Pisum sativum	light responsive element
DACA000928	G-Box	CACGTT	821	6	+	Pisum sativum	light responsive element
DACA000928	AuxRR-core	GGTCCAT	389	7	+	Nicotiana tabacum	auxin-responsive element
DACA000928	MBS	CAACTG	1578	6	+	Arabidopsis thaliana	drought-inducibility
DACA000928	TGA-element	AACGAC	878	6	-	Brassica oleracea	auxin-responsive element
DACA000928	TCA-element	CCATCTTTTT	38	9	-	Nicotiana tabacum	salicylic acid responsiveness
DACA000928	circadian	CAAAGATATC	449	9	-	Lycopersicon esculentum	circadian control
DACA000928	TGACG-motif	TGACG	784	5	+	Hordeum vulgare	MeJA-responsiveness
DACA000928	GCN4_motif	TGAGTCA	1460	7	-	Oryza sativa	endosperm expression
DACA000928	CGTCA-motif	CGTCA	784	5	-	Hordeum vulgare	MeJA-responsiveness
DACA000928	ARE	AAACCA	472	6	+	Zea mays	anaerobic induction
DACA000928	ARE	AAACCA	1159	6	+	Zea mays	anaerobic induction
DACA000928	ARE	AAACCA	1216	6	+	Zea mays	anaerobic induction
DACA000928	ARE	AAACCA	1962	6	-	Zea mays	anaerobic induction
DACA000928	3-AF1 binding site	TAAGAGAGGAA	18	10	+	Solanum tuberosum	light responsive element
DACA000928	LTR	CCGAAA	329	6	+	Hordeum vulgare	low-temperature responsiveness
DACA000928	Box II	CCACGTGGC	59	9	-	Petroselinum crispum	light responsive element
DACA000928	I-box	cCATATCCAAT	425	10	-	Flaveria trinervia	light responsive element
DACA000928	G-box	GCCACGTGGA	59	9	+	Arabidopsis thaliana	light responsive element
DACA000928	G-box	CACGTG	61	6	+	Arabidopsis thaliana	light responsive element
DACA000928	O2-site	GATGATGTGG	1220	9	-	Zea mays	zein metabolism regulation
DACA000928	ABRE	CACGTG	61	6	+	Arabidopsis thaliana	abscisic acid responsiveness
DACA000928	ABRE	ACGTG	62	5	+	Arabidopsis thaliana	abscisic acid responsiveness
DACA000928	ABRE	CGCACGTGTC	819	9	-	Hordeum vulgare	abscisic acid responsiveness
DACA000928	ABRE	ACGTG	821	5	-	Arabidopsis thaliana	abscisic acid responsiveness
DACA000929	CAT-box	GCCACT	1462	6	+	Arabidopsis thaliana	meristem expression
DACA000929	TGACG-motif	TGACG	1538	5	-	Hordeum vulgare	MeJA-responsiveness
DACA000929	CGTCA-motif	CGTCA	1538	5	+	Hordeum vulgare	MeJA-responsiveness
DACA000929	GARE-motif	TCTGTTG	1477	7	-	Brassica oleracea	gibberellin-responsive element
DACA000929	TCT-motif	TCTTAC	1963	6	+	Arabidopsis thaliana	light responsive element
DACA000929	ARE	AAACCA	245	6	-	Zea mays	anaerobic induction
DACA000929	ARE	AAACCA	624	6	-	Zea mays	anaerobic induction
DACA000929	ARE	AAACCA	638	6	-	Zea mays	anaerobic induction
DACA000929	ARE	AAACCA	926	6	-	Zea mays	anaerobic induction
DACA000929	ARE	AAACCA	1253	6	-	Zea mays	anaerobic induction
DACA000929	ARE	AAACCA	1762	6	-	Zea mays	anaerobic induction
DACA000929	ARE	AAACCA	1770	6	+	Zea mays	anaerobic induction
DACA000929	ABRE	CACGTG	704	6	+	Arabidopsis thaliana	abscisic acid responsiveness
DACA000929	ABRE	ACGTG	705	5	+	Arabidopsis thaliana	abscisic acid responsiveness
DACA000929	GT1-motif	GGTTAA	977	6	-	Arabidopsis thaliana	light responsive element
DACA000929	G-box	CACGTG	704	6	+	Arabidopsis thaliana	light responsive element
DACA000929	G-box	CACGAC	948	6	+	Zea mays	light responsive element
DACA000929	AE-box	AGAAACAA	1703	8	+	Arabidopsis thaliana	light responsive element
DACA000929	MBSI	aaaAaaC(G/C)GTTA	803	10.5	+	Petunia hybrida	flavonoid biosynthetic genes regulation
DACA000929	Gap-box	CAAATGAA(A/G)A	287	9	-	Arabidopsis thaliana	light responsive element
DACA000929	Box 4	ATTAAT	789	6	+	Petroselinum crispum	light responsive element
DACA000929	Box 4	ATTAAT	1288	6	-	Petroselinum crispum	light responsive element
DACA000929	Box 4	ATTAAT	1649	6	-	Petroselinum crispum	light responsive element
DACA000929	TATC-box	TATCCCA	490	7	+	Oryza sativa	gibberellin-responsive element
DACA000929	TATC-box	TATCCCA	685	7	+	Oryza sativa	gibberellin-responsive element
DACA000929	G-Box	CACGTG	704	6	+	Pisum sativum	light responsive element
DACA000929	TCA-element	CCATCTTTTT	346	9	+	Nicotiana tabacum	salicylic acid responsiveness
DACA000929	TGA-element	AACGAC	1448	6	+	Brassica oleracea	auxin-responsive element
DACA001730	Box 4	ATTAAT	1307	6	-	Petroselinum crispum	light responsive element
DACA001730	ATC-motif	AGTAATCT	1112	8	-	Spinacia oleracea	light responsive element
DACA001730	G-Box	CACGTT	299	6	+	Pisum sativum	light responsive element
DACA001730	G-Box	CACGTG	389	6	+	Pisum sativum	light responsive element
DACA001730	MBS	CAACTG	9	6	+	Arabidopsis thaliana	drought-inducibility
DACA001730	TGACG-motif	TGACG	629	5	+	Hordeum vulgare	MeJA-responsiveness
DACA001730	TGACG-motif	TGACG	953	5	-	Hordeum vulgare	MeJA-responsiveness
DACA001730	TGACG-motif	TGACG	1175	5	-	Hordeum vulgare	MeJA-responsiveness
DACA001730	TGACG-motif	TGACG	1596	5	-	Hordeum vulgare	MeJA-responsiveness
DACA001730	CAT-box	GCCACT	211	6	-	Arabidopsis thaliana	meristem expression
DACA001730	LAMP-element	CTTTATCA	690	8	+	Pisum sativum	light responsive element
DACA001730	GARE-motif	TCTGTTG	462	7	-	Brassica oleracea	gibberellin-responsive element
DACA001730	CGTCA-motif	CGTCA	629	5	-	Hordeum vulgare	MeJA-responsiveness
DACA001730	CGTCA-motif	CGTCA	953	5	+	Hordeum vulgare	MeJA-responsiveness
DACA001730	CGTCA-motif	CGTCA	1175	5	+	Hordeum vulgare	MeJA-responsiveness
DACA001730	CGTCA-motif	CGTCA	1596	5	+	Hordeum vulgare	MeJA-responsiveness
DACA001730	ARE	AAACCA	1018	6	+	Zea mays	anaerobic induction
DACA001730	ARE	AAACCA	1636	6	+	Zea mays	anaerobic induction
DACA001730	TCT-motif	TCTTAC	882	6	+	Arabidopsis thaliana	light responsive element
DACA001730	ABRE	ACGTG	299	5	-	Arabidopsis thaliana	abscisic acid responsiveness
DACA001730	ABRE	CACGTG	389	6	+	Arabidopsis thaliana	abscisic acid responsiveness
DACA001730	ABRE	ACGTG	390	5	+	Arabidopsis thaliana	abscisic acid responsiveness
DACA001730	ABRE	ACGTG	1594	5	-	Arabidopsis thaliana	abscisic acid responsiveness
DACA001730	G-box	ACACGTG(G/t)CACC	384	10.5	-	Lycopersicon esculentum	light responsive element
DACA001730	G-box	ACACGTGT	388	8	+	Brassica napus	light responsive element
DACA001730	G-box	CACGTG	389	6	+	Arabidopsis thaliana	light responsive element
DACA001730	G-box	CACGAC	1495	6	-	Zea mays	light responsive element
DACA001730	G-box	CACGTC	1594	6	+	Zea mays	light responsive element
DACA001730	O2-site	GATGATGTGG	636	9	+	Zea mays	zein metabolism regulation
DACA001730	O2-site	GATGACATGG	645	9	+	Zea mays	zein metabolism regulation
DACA001730	O2-site	GATGACATGG	1787	9	+	Zea mays	zein metabolism regulation
DACA001730	GT1-motif	GGTTAA	411	6	-	Arabidopsis thaliana	light responsive element
DACA001730	ATCT-motif	AATCTAATCC	22	9	-	Pisum sativum	light responsive element
DACA001730	ATCT-motif	AATCTAATCC	453	9	+	Pisum sativum	light responsive element
DACA001730	ATCT-motif	AATCTAATCC	1655	9	+	Pisum sativum	light responsive element
DACA002429	ABRE	CACGTG	1130	6	-	Arabidopsis thaliana	abscisic acid responsiveness
DACA002429	ABRE	ACGTG	1131	5	+	Arabidopsis thaliana	abscisic acid responsiveness
DACA002429	G-box	CACGTG	1130	6	-	Arabidopsis thaliana	light responsive element
DACA002429	O2-site	GATGATGTGG	77	9	-	Zea mays	zein metabolism regulation
DACA002429	MRE	AACCTAA	1450	7	-	Petroselinum crispum	light responsive element
DACA002429	ARE	AAACCA	1777	6	-	Zea mays	anaerobic induction
DACA002429	ARE	AAACCA	1917	6	-	Zea mays	anaerobic induction
DACA002429	ARE	AAACCA	1944	6	-	Zea mays	anaerobic induction
DACA002429	TCT-motif	TCTTAC	507	6	-	Arabidopsis thaliana	light responsive element
DACA002429	I-box	AGATAAGG	1143	8	-	Triticum aestivum	light responsive element
DACA002429	chs-CMA2a	TCACTTGA	275	8	-	Petroselinum crispum	light responsive element
DACA002429	GARE-motif	TCTGTTG	6	7	+	Brassica oleracea	gibberellin-responsive element
DACA002429	Sp1	GGGCGG	800	6	-	Oryza sativa	light responsive element
DACA002429	TC-rich repeats	ATTCTCTAAC	28	9	+	Nicotiana tabacum	defense and stress responsiveness
DACA002429	MBS	CAACTG	432	6	-	Arabidopsis thaliana	drought-inducibility
DACA002429	MBS	CAACTG	871	6	-	Arabidopsis thaliana	drought-inducibility
DACA002429	MBS	CAACTG	1240	6	-	Arabidopsis thaliana	drought-inducibility
DACA002429	G-Box	CACGTG	1130	6	-	Pisum sativum	light responsive element
DACA002429	Box 4	ATTAAT	1929	6	-	Petroselinum crispum	light responsive element
DACA002429	P-box	CCTTTTG	138	7	+	Oryza sativa	gibberellin-responsive element
DACA002429	P-box	CCTTTTG	382	7	+	Oryza sativa	gibberellin-responsive element
DACA002429	AE-box	AGAAACAA	365	8	+	Arabidopsis thaliana	light responsive element
DACA002429	RY-element	CATGCATG	1174	8	-	Helianthus annuus	seed-specific regulation
DACA002429	CAG-motif	GAAAGGCAGAC	643	10	+	Arabidopsis thaliana	light responsive element
DACA002672	CGTCA-motif	CGTCA	1095	5	-	Hordeum vulgare	MeJA-responsiveness
DACA002672	CGTCA-motif	CGTCA	1116	5	-	Hordeum vulgare	MeJA-responsiveness
DACA002672	TGACG-motif	TGACG	1095	5	+	Hordeum vulgare	MeJA-responsiveness
DACA002672	TGACG-motif	TGACG	1116	5	+	Hordeum vulgare	MeJA-responsiveness
DACA002672	CAT-box	GCCACT	1856	6	-	Arabidopsis thaliana	meristem expression
DACA002672	GATA-motif	AAGATAAGATT	1784	10	-	Arabidopsis thaliana	light responsive element
DACA002672	ARE	AAACCA	205	6	-	Zea mays	anaerobic induction
DACA002672	ARE	AAACCA	702	6	-	Zea mays	anaerobic induction
DACA002672	ARE	AAACCA	1171	6	-	Zea mays	anaerobic induction
DACA002672	ARE	AAACCA	1596	6	+	Zea mays	anaerobic induction
DACA002672	TCCC-motif	TCTCCCT	34	7	+	Spinacia oleracea	light responsive element
DACA002672	L-box	ATCCCACCTAC	321	10	-	Petroselinum crispum	light responsive element
DACA002672	TCA-element	CCATCTTTTT	253	9	+	Nicotiana tabacum	salicylic acid responsiveness
DACA002672	TCA-element	TCAGAAGAGG	707	9	+	Brassica oleracea	salicylic acid responsiveness
DACA002672	TATC-box	TATCCCA	1005	7	-	Oryza sativa	gibberellin-responsive element
DACA004061	ACE	GACACGTATG	789	9	-	Petroselinum crispum	light responsive element
DACA004061	TGACG-motif	TGACG	950	5	+	Hordeum vulgare	MeJA-responsiveness
DACA004061	Sp1	GGGCGG	1380	6	-	Oryza sativa	light responsive element
DACA004061	GARE-motif	TCTGTTG	1397	7	+	Brassica oleracea	gibberellin-responsive element
DACA004061	CGTCA-motif	CGTCA	950	5	-	Hordeum vulgare	MeJA-responsiveness
DACA004061	GATA-motif	AAGATAAGATT	1063	10	-	Arabidopsis thaliana	light responsive element
DACA004061	4cl-CMA2b	TCTCACCAACCCCA	341	13	-	Petroselinum crispum	light responsive element
DACA004061	ARE	AAACCA	597	6	+	Zea mays	anaerobic induction
DACA004061	ARE	AAACCA	730	6	-	Zea mays	anaerobic induction
DACA004061	ARE	AAACCA	865	6	+	Zea mays	anaerobic induction
DACA004061	ARE	AAACCA	933	6	+	Zea mays	anaerobic induction
DACA004061	ARE	AAACCA	1258	6	+	Zea mays	anaerobic induction
DACA004061	ARE	AAACCA	1764	6	-	Zea mays	anaerobic induction
DACA004061	LTR	CCGAAA	1361	6	-	Hordeum vulgare	low-temperature responsiveness
DACA004061	TCT-motif	TCTTAC	1133	6	+	Arabidopsis thaliana	light responsive element
DACA004061	G-box	TACGTG	666	6	+	Arabidopsis thaliana	light responsive element
DACA004061	G-box	TACGTG	791	6	+	Arabidopsis thaliana	light responsive element
DACA004061	G-box	TACGTG	992	6	+	Arabidopsis thaliana	light responsive element
DACA004061	O2-site	GTTGACGTGA	989	9	+	Zea mays	zein metabolism regulation
DACA004061	O2-site	GTTGACGTGA	1493	9	-	Zea mays	zein metabolism regulation
DACA004061	GT1-motif	GGTTAA	1006	6	+	Arabidopsis thaliana	light responsive element
DACA004061	ABRE	ACGTG	534	5	+	Arabidopsis thaliana	abscisic acid responsiveness
DACA004061	ABRE	ACGTG	667	5	+	Arabidopsis thaliana	abscisic acid responsiveness
DACA004061	ABRE	ACGTG	792	5	+	Arabidopsis thaliana	abscisic acid responsiveness
DACA004061	ABRE	ACGTG	993	5	+	Arabidopsis thaliana	abscisic acid responsiveness
DACA004061	RY-element	CATGCATG	824	8	+	Helianthus annuus	seed-specific regulation
DACA004061	Box 4	ATTAAT	560	6	+	Petroselinum crispum	light responsive element
DACA004061	Box 4	ATTAAT	850	6	+	Petroselinum crispum	light responsive element
DACA004061	G-Box	CACGTT	533	6	-	Pisum sativum	light responsive element
DACA004061	MBS	CAACTG	1825	6	-	Arabidopsis thaliana	drought-inducibility
DACA004061	TGA-element	AACGAC	1500	6	+	Brassica oleracea	auxin-responsive element
DACA005431	ARE	AAACCA	278	6	-	Zea mays	anaerobic induction
DACA005431	ARE	AAACCA	610	6	-	Zea mays	anaerobic induction
DACA005431	ARE	AAACCA	761	6	-	Zea mays	anaerobic induction
DACA005431	ARE	AAACCA	901	6	-	Zea mays	anaerobic induction
DACA005431	GATA-motif	GATAGGG	1448	7	-	Pisum sativum	light responsive element
DACA005431	TCT-motif	TCTTAC	1462	6	-	Arabidopsis thaliana	light responsive element
DACA005431	O2-site	GATGATGTGG	983	9	+	Zea mays	zein metabolism regulation
DACA005431	TC-rich repeats	GTTTTCTTAC	639	9	+	Nicotiana tabacum	defense and stress responsiveness
DACA005431	GARE-motif	TCTGTTG	605	7	+	Brassica oleracea	gibberellin-responsive element
DACA005431	GARE-motif	TCTGTTG	802	7	+	Brassica oleracea	gibberellin-responsive element
DACA005431	AE-box	AGAAACAA	83	8	+	Arabidopsis thaliana	light responsive element
DACA005431	AE-box	AGAAACTT	363	8	-	Arabidopsis thaliana	light responsive element
DACA005431	GC-motif	CCCCCG	117	6	-	Zea mays	anoxic specific inducibility
DACA005431	Box 4	ATTAAT	630	6	+	Petroselinum crispum	light responsive element
DACA005431	P-box	CCTTTTG	1205	7	-	Oryza sativa	gibberellin-responsive element
DACA005431	TCCC-motif	TCTCCCT	1936	7	+	Spinacia oleracea	light responsive element
DACA005525	ARE	AAACCA	446	6	-	Zea mays	anaerobic induction
DACA005525	GATA-motif	GATAGGG	225	7	-	Pisum sativum	light responsive element
DACA005525	I-box	TGATAATGT	303	9	-	Solanum tuberosum	light responsive element
DACA005525	I-box	AAGATAAGGCT	1459	10	-	Gossypium hirsutum	light responsive element
DACA005525	I-box	AGATAAGG	1461	8	-	Triticum aestivum	light responsive element
DACA005525	GT1-motif	GGTTAA	269	6	-	Arabidopsis thaliana	light responsive element
DACA005525	GT1-motif	GGTTAA	1770	6	+	Arabidopsis thaliana	light responsive element
DACA005525	G-box	CACGTG	1105	6	-	Arabidopsis thaliana	light responsive element
DACA005525	ABRE	CACGTG	1105	6	-	Arabidopsis thaliana	abscisic acid responsiveness
DACA005525	ABRE	ACGTG	1106	5	+	Arabidopsis thaliana	abscisic acid responsiveness
DACA005525	TGACG-motif	TGACG	1132	5	+	Hordeum vulgare	MeJA-responsiveness
DACA005525	GARE-motif	TCTGTTG	384	7	+	Brassica oleracea	gibberellin-responsive element
DACA005525	GCN4_motif	TGAGTCA	935	7	+	Oryza sativa	endosperm expression
DACA005525	CGTCA-motif	CGTCA	1132	5	-	Hordeum vulgare	MeJA-responsiveness
DACA005525	G-Box	CACGTG	1105	6	-	Pisum sativum	light responsive element
DACA005525	TCA-element	CCATCTTTTT	841	9	+	Nicotiana tabacum	salicylic acid responsiveness
DACA005525	TCA-element	TCAGAAGAGG	1321	9	-	Brassica oleracea	salicylic acid responsiveness
DACA005525	GC-motif	CCCCCG	286	6	-	Zea mays	anoxic specific inducibility
DACA005525	P-box	CCTTTTG	1726	7	+	Oryza sativa	gibberellin-responsive element
DACA006153	P-box	CCTTTTG	977	7	+	Oryza sativa	gibberellin-responsive element
DACA006153	Box 4	ATTAAT	1391	6	-	Petroselinum crispum	light responsive element
DACA006153	TCA-element	TCAGAAGAGG	1780	9	+	Brassica oleracea	salicylic acid responsiveness
DACA006153	AuxRR-core	GGTCCAT	1437	7	-	Nicotiana tabacum	auxin-responsive element
DACA006153	G-Box	CACGTG	321	6	+	Pisum sativum	light responsive element
DACA006153	G-Box	CACGTG	385	6	+	Pisum sativum	light responsive element
DACA006153	CGTCA-motif	CGTCA	797	5	-	Hordeum vulgare	MeJA-responsiveness
DACA006153	CAT-box	GCCACT	47	6	-	Arabidopsis thaliana	meristem expression
DACA006153	ACE	GACACGTATG	1729	9	+	Petroselinum crispum	light responsive element
DACA006153	TGACG-motif	TGACG	797	5	+	Hordeum vulgare	MeJA-responsiveness
DACA006153	G-box	CACGTG	321	6	+	Arabidopsis thaliana	light responsive element
DACA006153	G-box	CACGTG	385	6	+	Arabidopsis thaliana	light responsive element
DACA006153	O2-site	GATGATGTGG	1479	9	-	Zea mays	zein metabolism regulation
DACA006153	GT1-motif	GGTTAA	1185	6	-	Arabidopsis thaliana	light responsive element
DACA006153	ABRE	CACGTG	321	6	+	Arabidopsis thaliana	abscisic acid responsiveness
DACA006153	ABRE	ACGTG	322	5	+	Arabidopsis thaliana	abscisic acid responsiveness
DACA006153	ABRE	CACGTG	385	6	+	Arabidopsis thaliana	abscisic acid responsiveness
DACA006153	ABRE	ACGTG	386	5	+	Arabidopsis thaliana	abscisic acid responsiveness
DACA006153	TCT-motif	TCTTAC	1056	6	-	Arabidopsis thaliana	light responsive element
DACA006153	I-box	cCATATCCAAT	543	10	+	Flaveria trinervia	light responsive element
DACA006153	ARE	AAACCA	108	6	+	Zea mays	anaerobic induction
DACA006153	ARE	AAACCA	812	6	+	Zea mays	anaerobic induction
DACA006215	P-box	CCTTTTG	1654	7	-	Oryza sativa	gibberellin-responsive element
DACA006215	Box 4	ATTAAT	1537	6	-	Petroselinum crispum	light responsive element
DACA006215	TCCC-motif	TCTCCCT	1266	7	+	Spinacia oleracea	light responsive element
DACA006215	GC-motif	CCCCCG	1127	6	+	Zea mays	anoxic specific inducibility
DACA006215	MBS	CAACTG	1338	6	+	Arabidopsis thaliana	drought-inducibility
DACA006215	GA-motif	ATAGATAA	715	8	+	Arabidopsis thaliana	light responsive element
DACA006215	GA-motif	ATAGATAA	1408	8	-	Arabidopsis thaliana	light responsive element
DACA006215	TGA-box	TGACGTAA	1585	8	-	Glycine max	auxin-responsive element
DACA006215	TATC-box	TATCCCA	711	7	-	Oryza sativa	gibberellin-responsive element
DACA006215	CGTCA-motif	CGTCA	1588	5	+	Hordeum vulgare	MeJA-responsiveness
DACA006215	CGTCA-motif	CGTCA	1829	5	-	Hordeum vulgare	MeJA-responsiveness
DACA006215	CGTCA-motif	CGTCA	1832	5	+	Hordeum vulgare	MeJA-responsiveness
DACA006215	TGACG-motif	TGACG	1588	5	-	Hordeum vulgare	MeJA-responsiveness
DACA006215	TGACG-motif	TGACG	1829	5	+	Hordeum vulgare	MeJA-responsiveness
DACA006215	TGACG-motif	TGACG	1832	5	-	Hordeum vulgare	MeJA-responsiveness
DACA006215	TC-rich repeats	ATTCTCTAAC	736	9	-	Nicotiana tabacum	defense and stress responsiveness
DACA006215	CAT-box	GCCACT	1855	6	+	Arabidopsis thaliana	meristem expression
DACA006215	GT1-motif	GGTTAA	42	6	-	Arabidopsis thaliana	light responsive element
DACA006215	O2-site	GATGACATGG	639	9	-	Zea mays	zein metabolism regulation
DACA006215	O2-site	GATGATGTGG	1856	9	-	Zea mays	zein metabolism regulation
DACA006215	3-AF1 binding site	TAAGAGAGGAA	1082	10	-	Solanum tuberosum	light responsive element
DACA006215	3-AF1 binding site	TAAGAGAGGAA	1147	10	+	Solanum tuberosum	light responsive element
DACA006215	ARE	AAACCA	1904	6	+	Zea mays	anaerobic induction
DACA006215	ARE	AAACCA	1961	6	+	Zea mays	anaerobic induction
DACA006215	GATA-motif	GATAGGA	1096	7	-	Arabidopsis thaliana	light responsive element
DACA006215	MRE	AACCTAA	98	7	-	Petroselinum crispum	light responsive element
DACA006215	MRE	AACCTAA	615	7	-	Petroselinum crispum	light responsive element
DACA006215	chs-CMA2a	TCACTTGA	1293	8	+	Petroselinum crispum	light responsive element
DACA006215	TCT-motif	TCTTAC	1324	6	+	Arabidopsis thaliana	light responsive element
DACA006650	AE-box	AGAAACTT	769	8	+	Arabidopsis thaliana	light responsive element
DACA006650	P-box	CCTTTTG	1526	7	-	Oryza sativa	gibberellin-responsive element
DACA006650	Box 4	ATTAAT	315	6	+	Petroselinum crispum	light responsive element
DACA006650	chs-CMA1a	TTACTTAA	1224	8	+	Daucus carota	light responsive element
DACA006650	TCA-element	TCAGAAGAGG	1473	9	+	Brassica oleracea	salicylic acid responsiveness
DACA006650	TCA-element	CCATCTTTTT	1502	9	-	Nicotiana tabacum	salicylic acid responsiveness
DACA006650	TCA-element	CCATCTTTTT	1890	9	-	Nicotiana tabacum	salicylic acid responsiveness
DACA006650	GA-motif	ATAGATAA	591	8	+	Arabidopsis thaliana	light responsive element
DACA006650	TGACG-motif	TGACG	1314	5	+	Hordeum vulgare	MeJA-responsiveness
DACA006650	TGACG-motif	TGACG	1834	5	+	Hordeum vulgare	MeJA-responsiveness
DACA006650	GARE-motif	TCTGTTG	735	7	-	Brassica oleracea	gibberellin-responsive element
DACA006650	CGTCA-motif	CGTCA	1314	5	-	Hordeum vulgare	MeJA-responsiveness
DACA006650	CGTCA-motif	CGTCA	1834	5	-	Hordeum vulgare	MeJA-responsiveness
DACA006650	ARE	AAACCA	460	6	+	Zea mays	anaerobic induction
DACA006650	ARE	AAACCA	1157	6	+	Zea mays	anaerobic induction
DACA006650	ARE	AAACCA	1983	6	+	Zea mays	anaerobic induction
DACA006650	GATA-motif	AAGGATAAGG	939	9	-	Solanum tuberosum	light responsive element
DACA006650	LTR	CCGAAA	816	6	-	Hordeum vulgare	low-temperature responsiveness
DACA006650	LTR	CCGAAA	1570	6	+	Hordeum vulgare	low-temperature responsiveness
DACA006650	TCT-motif	TCTTAC	1222	6	+	Arabidopsis thaliana	light responsive element
DACA006650	O2-site	GATGATGTGG	1415	9	+	Zea mays	zein metabolism regulation
DACA006650	G-box	TACGTG	1310	6	+	Arabidopsis thaliana	light responsive element
DACA006650	ABRE	ACGTG	1311	5	+	Arabidopsis thaliana	abscisic acid responsiveness
DACA006789	chs-CMA1a	TTACTTAA	364	8	+	Daucus carota	light responsive element
DACA006789	chs-CMA1a	TTACTTAA	1958	8	+	Daucus carota	light responsive element
DACA006789	RY-element	CATGCATG	497	8	+	Helianthus annuus	seed-specific regulation
DACA006789	MBSI	aaaAaaC(G/C)GTTA	349	10.5	+	Petunia hybrida	flavonoid biosynthetic genes regulation
DACA006789	Box 4	ATTAAT	137	6	+	Petroselinum crispum	light responsive element
DACA006789	Box 4	ATTAAT	301	6	+	Petroselinum crispum	light responsive element
DACA006789	Box 4	ATTAAT	382	6	+	Petroselinum crispum	light responsive element
DACA006789	Box 4	ATTAAT	489	6	+	Petroselinum crispum	light responsive element
DACA006789	Box 4	ATTAAT	656	6	+	Petroselinum crispum	light responsive element
DACA006789	Box 4	ATTAAT	736	6	+	Petroselinum crispum	light responsive element
DACA006789	Box 4	ATTAAT	1372	6	-	Petroselinum crispum	light responsive element
DACA006789	I-box	GTATAAGGCC	1261	9	-	Larix laricina	light responsive element
DACA006789	GATA-motif	GATAGGA	1453	7	+	Arabidopsis thaliana	light responsive element
DACA006789	ARE	AAACCA	463	6	-	Zea mays	anaerobic induction
DACA006789	ARE	AAACCA	503	6	-	Zea mays	anaerobic induction
DACA006789	ARE	AAACCA	993	6	-	Zea mays	anaerobic induction
DACA006789	ARE	AAACCA	1244	6	-	Zea mays	anaerobic induction
DACA006789	G-box	TACGTG	1547	6	-	Arabidopsis thaliana	light responsive element
DACA006789	G-box	CACGTC	1804	6	-	Zea mays	light responsive element
DACA006789	O2-site	GATGACATGG	1878	9	-	Zea mays	zein metabolism regulation
DACA006789	ABRE	GACACGTGGC	979	9	+	Triticum aestivum	abscisic acid responsiveness
DACA006789	ABRE	ACGTG	1547	5	-	Arabidopsis thaliana	abscisic acid responsiveness
DACA006789	ABRE	ACGTG	1805	5	+	Arabidopsis thaliana	abscisic acid responsiveness
DACA006789	ACE	CTAACGTATT	1464	9	+	Petroselinum crispum	light responsive element
DACA006946	TCA-element	TCAGAAGAGG	1575	9	+	Brassica oleracea	salicylic acid responsiveness
DACA006946	TGA-element	AACGAC	456	6	-	Brassica oleracea	auxin-responsive element
DACA006946	TGA-element	AACGAC	1227	6	+	Brassica oleracea	auxin-responsive element
DACA006946	MBS	CAACTG	599	6	+	Arabidopsis thaliana	drought-inducibility
DACA006946	Box 4	ATTAAT	370	6	+	Petroselinum crispum	light responsive element
DACA006946	Box 4	ATTAAT	439	6	+	Petroselinum crispum	light responsive element
DACA006946	Box 4	ATTAAT	947	6	+	Petroselinum crispum	light responsive element
DACA006946	Box 4	ATTAAT	1006	6	-	Petroselinum crispum	light responsive element
DACA006946	Box 4	ATTAAT	1146	6	-	Petroselinum crispum	light responsive element
DACA006946	I-box	atGATAAGGTC	1855	10	+	Helianthus annuus	light responsive element
DACA006946	TCT-motif	TCTTAC	139	6	+	Arabidopsis thaliana	light responsive element
DACA006946	MRE	AACCTAA	1221	7	+	Petroselinum crispum	light responsive element
DACA006946	ARE	AAACCA	1341	6	-	Zea mays	anaerobic induction
DACA006946	ARE	AAACCA	1377	6	-	Zea mays	anaerobic induction
DACA006946	GT1-motif	GGTTAA	417	6	+	Arabidopsis thaliana	light responsive element
DACA006946	GT1-motif	GGTTAAT	1263	7	-	Avena sativa	light responsive element
DACA006946	GT1-motif	GGTTAA	1264	6	-	Arabidopsis thaliana	light responsive element
DACA006946	G-box	CACGAC	1565	6	+	Zea mays	light responsive element
DACA006946	CAT-box	GCCACT	1898	6	+	Arabidopsis thaliana	meristem expression
DACA006946	TGACG-motif	TGACG	1616	5	+	Hordeum vulgare	MeJA-responsiveness
DACA006946	TGACG-motif	TGACG	1662	5	-	Hordeum vulgare	MeJA-responsiveness
DACA006946	ACE	CTAACGTATT	373	9	-	Petroselinum crispum	light responsive element
DACA006946	CGTCA-motif	CGTCA	1616	5	-	Hordeum vulgare	MeJA-responsiveness
DACA006946	CGTCA-motif	CGTCA	1662	5	+	Hordeum vulgare	MeJA-responsiveness
DACA006946	GCN4_motif	TGAGTCA	1399	7	-	Oryza sativa	endosperm expression
DACA008364	Box 4	ATTAAT	519	6	+	Petroselinum crispum	light responsive element
DACA008364	GA-motif	ATAGATAA	1192	8	-	Arabidopsis thaliana	light responsive element
DACA008364	TCA-element	CCATCTTTTT	1451	9	+	Nicotiana tabacum	salicylic acid responsiveness
DACA008364	TGA-element	AACGAC	1563	6	+	Brassica oleracea	auxin-responsive element
DACA008364	MBS	CAACTG	280	6	-	Arabidopsis thaliana	drought-inducibility
DACA008364	MBS	CAACTG	1233	6	+	Arabidopsis thaliana	drought-inducibility
DACA008364	MBS	CAACTG	1704	6	-	Arabidopsis thaliana	drought-inducibility
DACA008364	G-Box	CACGTT	1062	6	-	Pisum sativum	light responsive element
DACA008364	G-Box	CACGTT	1485	6	-	Pisum sativum	light responsive element
DACA008364	CGTCA-motif	CGTCA	67	5	+	Hordeum vulgare	MeJA-responsiveness
DACA008364	CGTCA-motif	CGTCA	222	5	-	Hordeum vulgare	MeJA-responsiveness
DACA008364	CGTCA-motif	CGTCA	1099	5	-	Hordeum vulgare	MeJA-responsiveness
DACA008364	CAT-box	GCCACT	600	6	+	Arabidopsis thaliana	meristem expression
DACA008364	TGACG-motif	TGACG	67	5	-	Hordeum vulgare	MeJA-responsiveness
DACA008364	TGACG-motif	TGACG	222	5	+	Hordeum vulgare	MeJA-responsiveness
DACA008364	TGACG-motif	TGACG	1099	5	+	Hordeum vulgare	MeJA-responsiveness
DACA008364	Sp1	GGGCGG	1767	6	-	Oryza sativa	light responsive element
DACA008364	ACE	GACACGTATG	8	9	+	Petroselinum crispum	light responsive element
DACA008364	ABRE	ACGTG	28	5	+	Arabidopsis thaliana	abscisic acid responsiveness
DACA008364	ABRE	ACGTG	1063	5	+	Arabidopsis thaliana	abscisic acid responsiveness
DACA008364	ABRE	GCAACGTGTC	1483	10	+	Hordeum vulgare	abscisic acid responsiveness
DACA008364	ABRE	ACGTG	1486	5	+	Arabidopsis thaliana	abscisic acid responsiveness
DACA008364	G-box	CACGTC	27	6	-	Zea mays	light responsive element
DACA008364	O2-site	GATGATGTGG	900	9	+	Zea mays	zein metabolism regulation
DACA008364	GT1-motif	GGTTAA	1595	6	-	Arabidopsis thaliana	light responsive element
DACA008364	GT1-motif	GGTTAA	1644	6	+	Arabidopsis thaliana	light responsive element
DACA008364	TCT-motif	TCTTAC	1027	6	-	Arabidopsis thaliana	light responsive element
DACA008364	ARE	AAACCA	254	6	-	Zea mays	anaerobic induction
DACA008364	ARE	AAACCA	1984	6	-	Zea mays	anaerobic induction
DACA008394	G-box	CCACGTAA	1907	8	+	Brassica napus	light responsive element
DACA008394	G-box	TACGTG	1908	6	-	Arabidopsis thaliana	light responsive element
DACA008394	O2-site	GTTGACGTGA	1586	9	-	Zea mays	zein metabolism regulation
DACA008394	GT1-motif	GGTTAA	132	6	-	Arabidopsis thaliana	light responsive element
DACA008394	ABRE	ACGTG	399	5	+	Arabidopsis thaliana	abscisic acid responsiveness
DACA008394	ABRE	ACGTG	1908	5	-	Arabidopsis thaliana	abscisic acid responsiveness
DACA008394	ARE	AAACCA	393	6	+	Zea mays	anaerobic induction
DACA008394	ARE	AAACCA	1045	6	-	Zea mays	anaerobic induction
DACA008394	ARE	AAACCA	1382	6	-	Zea mays	anaerobic induction
DACA008394	ARE	AAACCA	1702	6	-	Zea mays	anaerobic induction
DACA008394	MRE	AACCTAA	1386	7	-	Petroselinum crispum	light responsive element
DACA008394	TCT-motif	TCTTAC	1118	6	-	Arabidopsis thaliana	light responsive element
DACA008394	TCT-motif	TCTTAC	1824	6	-	Arabidopsis thaliana	light responsive element
DACA008394	ACE	GACACGTATG	361	9	-	Petroselinum crispum	light responsive element
DACA008394	MBS	CAACTG	1669	6	-	Arabidopsis thaliana	drought-inducibility
DACA008394	TGA-element	AACGAC	1183	6	-	Brassica oleracea	auxin-responsive element
DACA008394	G-Box	CACGTT	398	6	-	Pisum sativum	light responsive element
DACA008394	chs-CMA1a	TTACTTAA	1807	8	+	Daucus carota	light responsive element
DACA008394	Box 4	ATTAAT	429	6	+	Petroselinum crispum	light responsive element
DACA008395	ABRE	ACGTG	1946	5	-	Arabidopsis thaliana	abscisic acid responsiveness
DACA008395	G-box	CCACGTAA	1945	8	+	Brassica napus	light responsive element
DACA008395	G-box	TACGTG	1946	6	-	Arabidopsis thaliana	light responsive element
DACA008395	O2-site	GTTGACGTGA	1639	9	-	Zea mays	zein metabolism regulation
DACA008395	TCT-motif	TCTTAC	296	6	-	Arabidopsis thaliana	light responsive element
DACA008395	TCT-motif	TCTTAC	1168	6	-	Arabidopsis thaliana	light responsive element
DACA008395	TCT-motif	TCTTAC	1877	6	-	Arabidopsis thaliana	light responsive element
DACA008395	MRE	AACCTAA	1439	7	-	Petroselinum crispum	light responsive element
DACA008395	ARE	AAACCA	1095	6	-	Zea mays	anaerobic induction
DACA008395	ARE	AAACCA	1435	6	-	Zea mays	anaerobic induction
DACA008395	ARE	AAACCA	1755	6	-	Zea mays	anaerobic induction
DACA008395	TC-rich repeats	GTTTTCTTAC	296	9	-	Nicotiana tabacum	defense and stress responsiveness
DACA008395	TGA-element	AACGAC	1233	6	-	Brassica oleracea	auxin-responsive element
DACA008395	MBS	CAACTG	1722	6	-	Arabidopsis thaliana	drought-inducibility
DACA008395	chs-CMA1a	TTACTTAA	1860	8	+	Daucus carota	light responsive element
DACA008865	TCT-motif	TCTTAC	521	6	+	Arabidopsis thaliana	light responsive element
DACA008865	O2-site	GATGATGTGG	174	9	+	Zea mays	zein metabolism regulation
DACA008865	GT1-motif	GGTTAAT	1184	7	-	Avena sativa	light responsive element
DACA008865	GT1-motif	GGTTAA	1185	6	-	Arabidopsis thaliana	light responsive element
DACA008865	ABRE	ACGTG	1670	5	-	Arabidopsis thaliana	abscisic acid responsiveness
DACA008865	TGACG-motif	TGACG	954	5	-	Hordeum vulgare	MeJA-responsiveness
DACA008865	TC-rich repeats	ATTCTCTAAC	517	9	+	Nicotiana tabacum	defense and stress responsiveness
DACA008865	CAT-box	GCCACT	644	6	+	Arabidopsis thaliana	meristem expression
DACA008865	CGTCA-motif	CGTCA	954	5	+	Hordeum vulgare	MeJA-responsiveness
DACA008865	G-Box	CACGTT	1670	6	+	Pisum sativum	light responsive element
DACA008865	AuxRR-core	GGTCCAT	736	7	-	Nicotiana tabacum	auxin-responsive element
DACA008865	MBS	CAACTG	1848	6	+	Arabidopsis thaliana	drought-inducibility
DACA008865	AE-box	AGAAACAA	1164	8	-	Arabidopsis thaliana	light responsive element
DACA008865	P-box	CCTTTTG	410	7	-	Oryza sativa	gibberellin-responsive element
DACA008865	Box 4	ATTAAT	489	6	+	Petroselinum crispum	light responsive element
DACA008865	TCCC-motif	TCTCCCT	414	7	-	Spinacia oleracea	light responsive element
DACA008908	GATA-motif	AAGATAAGATT	23	11	+	Arabidopsis thaliana	light responsive element
DACA008908	3-AF1 binding site	TAAGAGAGGAA	602	10	+	Solanum tuberosum	light responsive element
DACA008908	ARE	AAACCA	47	6	-	Zea mays	anaerobic induction
DACA008908	ARE	AAACCA	296	6	-	Zea mays	anaerobic induction
DACA008908	ARE	AAACCA	1247	6	-	Zea mays	anaerobic induction
DACA008908	ARE	AAACCA	1406	6	-	Zea mays	anaerobic induction
DACA008908	ARE	AAACCA	1841	6	-	Zea mays	anaerobic induction
DACA008908	ARE	AAACCA	1971	6	+	Zea mays	anaerobic induction
DACA008908	ARE	AAACCA	1982	6	+	Zea mays	anaerobic induction
DACA008908	ABRE	GCAACGTGTC	719	9	+	Hordeum vulgare	abscisic acid responsiveness
DACA008908	ABRE	ACGTG	722	5	+	Arabidopsis thaliana	abscisic acid responsiveness
DACA008908	G-box	CACGAC	712	6	+	Zea mays	light responsive element
DACA008908	O2-site	GATGACATGG	289	9	+	Zea mays	zein metabolism regulation
DACA008908	ATCT-motif	AATCTAATCC	1711	9	-	Pisum sativum	light responsive element
DACA008908	ACE	GACACGTATG	788	9	-	Petroselinum crispum	light responsive element
DACA008908	G-Box	CACGTT	721	6	-	Pisum sativum	light responsive element
DACA008908	TCA-element	CCATCTTTTT	1818	9	+	Nicotiana tabacum	salicylic acid responsiveness
DACA008908	MBS	CAACTG	1685	6	+	Arabidopsis thaliana	drought-inducibility
DACA008908	Box 4	ATTAAT	90	6	+	Petroselinum crispum	light responsive element
DACA008908	Box 4	ATTAAT	303	6	+	Petroselinum crispum	light responsive element
DACA008908	Box 4	ATTAAT	799	6	+	Petroselinum crispum	light responsive element
DACA008908	Box 4	ATTAAT	1216	6	-	Petroselinum crispum	light responsive element
DACA009322	G-box	ACACGTG(G/t)CACC	21	10.5	+	Lycopersicon esculentum	light responsive element
DACA009322	G-box	CACGTG	22	6	+	Arabidopsis thaliana	light responsive element
DACA009322	G-box	CACGTC	560	6	+	Zea mays	light responsive element
DACA009322	O2-site	GATGACATGG	1179	9	+	Zea mays	zein metabolism regulation
DACA009322	ABRE	CGCACGTGTC	20	9	+	Hordeum vulgare	abscisic acid responsiveness
DACA009322	ABRE	CACGTG	22	6	+	Arabidopsis thaliana	abscisic acid responsiveness
DACA009322	ABRE	ACGTG	23	5	+	Arabidopsis thaliana	abscisic acid responsiveness
DACA009322	ABRE	ACGTG	560	5	-	Arabidopsis thaliana	abscisic acid responsiveness
DACA009322	ABRE	TACGGTC	1934	7	+	Arabidopsis thaliana	abscisic acid responsiveness
DACA009322	TCT-motif	TCTTAC	1457	6	+	Arabidopsis thaliana	light responsive element
DACA009322	GATA-motif	GATAGGG	37	7	+	Pisum sativum	light responsive element
DACA009322	ARE	AAACCA	259	6	+	Zea mays	anaerobic induction
DACA009322	ARE	AAACCA	926	6	+	Zea mays	anaerobic induction
DACA009322	TGA-element	AACGAC	1941	6	-	Brassica oleracea	auxin-responsive element
DACA009322	G-Box	CACGTG	22	6	+	Pisum sativum	light responsive element
DACA009322	TATC-box	TATCCCA	590	7	+	Oryza sativa	gibberellin-responsive element
DACA009322	Gap-box	CAAATGAA(A/G)A	1088	9.5	+	Arabidopsis thaliana	light responsive element
DACA009322	Gap-box	CAAATGAA(A/G)A	1356	9.5	+	Arabidopsis thaliana	light responsive element
DACA009322	TCCC-motif	TCTCCCT	1467	7	+	Spinacia oleracea	light responsive element
DACA009322	Box 4	ATTAAT	1340	6	-	Petroselinum crispum	light responsive element
DACA009322	ACA-motif	AATTACAGCCATT	1436	12	+	Pisum sativum	light responsive element
DACA010840	TCCC-motif	TCTCCCT	1613	7	-	Spinacia oleracea	light responsive element
DACA010840	TCCC-motif	TCTCCCT	1649	7	+	Spinacia oleracea	light responsive element
DACA010840	GC-motif	CCCCCG	514	6	+	Zea mays	anoxic specific inducibility
DACA010840	G-box	TACGTG	130	6	+	Arabidopsis thaliana	light responsive element
DACA010840	G-box	TACGTG	751	6	-	Arabidopsis thaliana	light responsive element
DACA010840	ABRE	ACGTG	131	5	+	Arabidopsis thaliana	abscisic acid responsiveness
DACA010840	ABRE	ACGTG	751	5	-	Arabidopsis thaliana	abscisic acid responsiveness
DACA010840	ARE	AAACCA	69	6	+	Zea mays	anaerobic induction
DACA010840	ARE	AAACCA	200	6	+	Zea mays	anaerobic induction
DACA010840	ARE	AAACCA	417	6	-	Zea mays	anaerobic induction
DACA010840	ARE	AAACCA	535	6	-	Zea mays	anaerobic induction
DACA010840	ARE	AAACCA	1759	6	+	Zea mays	anaerobic induction
DACA010840	MRE	AACCTAA	506	7	+	Petroselinum crispum	light responsive element
DACA010840	ACE	GACACGTATG	1747	9	-	Petroselinum crispum	light responsive element
DACA010840	MBS	CAACTG	179	6	+	Arabidopsis thaliana	drought-inducibility
DACA010840	circadian	CAAAGATATC	1028	9	-	Lycopersicon esculentum	circadian control
DACA010840	circadian	CAAAGATATC	1042	9	+	Lycopersicon esculentum	circadian control
DACA010840	TCA-element	CCATCTTTTT	874	9	+	Nicotiana tabacum	salicylic acid responsiveness
DACA010840	ATC-motif	AGTAATCT	145	8	-	Spinacia oleracea	light responsive element
DACA010840	AAAC-motif	CAATCAAAACCT	1677	11	-	Spinacia oleracea	light responsive element
DACA010840	GT1-motif	GGTTAAT	1910	7	+	Avena sativa	light responsive element
DACA010840	TCT-motif	TCTTAC	76	6	+	Arabidopsis thaliana	light responsive element
DACA010840	TCT-motif	TCTTAC	638	6	-	Arabidopsis thaliana	light responsive element
DACA010840	I-box	gGATAAGGTG	585	9	+	Zea mays	light responsive element
DACA010840	GATA-motif	AAGATAAGATT	265	10	+	Arabidopsis thaliana	light responsive element
DACA010840	GATA-motif	AAGGATAAGG	583	9	+	Solanum tuberosum	light responsive element
DACA010840	LTR	CCGAAA	488	6	-	Hordeum vulgare	low-temperature responsiveness
DACA010840	LAMP-element	CTTTATCA	684	8	-	Pisum sativum	light responsive element
DACA010840	LAMP-element	CTTTATCA	845	8	+	Pisum sativum	light responsive element
DACA012489	I-box	atGATAAGGTC	218	10	+	Helianthus annuus	light responsive element
DACA012489	ARE	AAACCA	681	6	-	Zea mays	anaerobic induction
DACA012489	GATA-motif	AAGATAAGATT	1128	10	+	Arabidopsis thaliana	light responsive element
DACA012489	GATA-motif	AAGGATAAGG	1335	9	-	Solanum tuberosum	light responsive element
DACA012489	GT1-motif	GGTTAA	1440	6	+	Arabidopsis thaliana	light responsive element
DACA012489	O2-site	GATGATGTGG	1664	9	+	Zea mays	zein metabolism regulation
DACA012489	G-box	CACGAC	1991	6	-	Zea mays	light responsive element
DACA012489	TC-rich repeats	GTTTTCTTAC	1319	9	+	Nicotiana tabacum	defense and stress responsiveness
DACA012489	TC-rich repeats	GTTTTCTTAC	1374	9	-	Nicotiana tabacum	defense and stress responsiveness
DACA012489	CAT-box	GCCACT	590	6	-	Arabidopsis thaliana	meristem expression
DACA012489	TGACG-motif	TGACG	1730	5	+	Hordeum vulgare	MeJA-responsiveness
DACA012489	GCN4_motif	TGAGTCA	136	7	-	Oryza sativa	endosperm expression
DACA012489	CGTCA-motif	CGTCA	1730	5	-	Hordeum vulgare	MeJA-responsiveness
DACA012489	MSA-like	TCAAACGGT	1101	9	+	Catharanthus roseus	cell cycle regulation
DACA012489	AuxRR-core	GGTCCAT	60	7	-	Nicotiana tabacum	auxin-responsive element
DACA012489	AuxRR-core	GGTCCAT	1500	7	+	Nicotiana tabacum	auxin-responsive element
DACA012489	chs-CMA1a	TTACTTAA	484	8	-	Daucus carota	light responsive element
DACA012489	MBS	CAACTG	15	6	-	Arabidopsis thaliana	drought-inducibility
DACA012489	GC-motif	CCCCCG	65	6	+	Zea mays	anoxic specific inducibility
DACA012489	AT1-motif	AATTATTTTTTATT	557	13	+	Solanum tuberosum	light responsive element
DACA012489	Box 4	ATTAAT	52	6	+	Petroselinum crispum	light responsive element
DACA012489	Box 4	ATTAAT	342	6	+	Petroselinum crispum	light responsive element
DACA013303	ARE	AAACCA	315	6	+	Zea mays	anaerobic induction
DACA013303	ARE	AAACCA	404	6	+	Zea mays	anaerobic induction
DACA013303	MRE	AACCTAA	1333	7	+	Petroselinum crispum	light responsive element
DACA013303	LTR	CCGAAA	1760	6	+	Hordeum vulgare	low-temperature responsiveness
DACA013303	G-box	CACGTG	623	6	+	Arabidopsis thaliana	light responsive element
DACA013303	GT1-motif	GGTTAAT	932	7	+	Avena sativa	light responsive element
DACA013303	ABRE	CACGTG	623	6	+	Arabidopsis thaliana	abscisic acid responsiveness
DACA013303	ABRE	ACGTG	624	5	+	Arabidopsis thaliana	abscisic acid responsiveness
DACA013303	ABRE	ACGTG	873	5	-	Arabidopsis thaliana	abscisic acid responsiveness
DACA013303	ABRE	ACGTG	1494	5	-	Arabidopsis thaliana	abscisic acid responsiveness
DACA013303	TGACG-motif	TGACG	257	5	+	Hordeum vulgare	MeJA-responsiveness
DACA013303	TGACG-motif	TGACG	1555	5	-	Hordeum vulgare	MeJA-responsiveness
DACA013303	Sp1	GGGCGG	1035	6	-	Oryza sativa	light responsive element
DACA013303	LAMP-element	CTTTATCA	1539	8	-	Pisum sativum	light responsive element
DACA013303	CGTCA-motif	CGTCA	257	5	-	Hordeum vulgare	MeJA-responsiveness
DACA013303	CGTCA-motif	CGTCA	1555	5	+	Hordeum vulgare	MeJA-responsiveness
DACA013303	G-Box	CACGTG	623	6	+	Pisum sativum	light responsive element
DACA013303	G-Box	CACGTT	873	6	+	Pisum sativum	light responsive element
DACA013303	G-Box	CACGTT	1494	6	+	Pisum sativum	light responsive element
DACA013303	TATC-box	TATCCCA	868	7	+	Oryza sativa	gibberellin-responsive element
DACA013303	GA-motif	ATAGATAA	1155	8	+	Arabidopsis thaliana	light responsive element
DACA013303	AT1-motif	AATTATTTTTTATT	1111	13	-	Solanum tuberosum	light responsive element
DACA013303	Box 4	ATTAAT	60	6	+	Petroselinum crispum	light responsive element
DACA013303	Box 4	ATTAAT	1401	6	-	Petroselinum crispum	light responsive element
DACA013364	AE-box	AGAAACTT	501	8	+	Arabidopsis thaliana	light responsive element
DACA013364	AE-box	AGAAACTT	1524	8	-	Arabidopsis thaliana	light responsive element
DACA013364	TCCC-motif	TCTCCCT	1896	7	+	Spinacia oleracea	light responsive element
DACA013364	TATC-box	TATCCCA	37	7	+	Oryza sativa	gibberellin-responsive element
DACA013364	TCA-element	TCAGAAGAGG	1536	9	+	Brassica oleracea	salicylic acid responsiveness
DACA013364	GA-motif	ATAGATAA	32	8	-	Arabidopsis thaliana	light responsive element
DACA013364	GA-motif	ATAGATAA	108	8	-	Arabidopsis thaliana	light responsive element
DACA013364	TGACG-motif	TGACG	400	5	-	Hordeum vulgare	MeJA-responsiveness
DACA013364	CAT-box	GCCACT	1941	6	+	Arabidopsis thaliana	meristem expression
DACA013364	TC-rich repeats	GTTTTCTTAC	1142	9	-	Nicotiana tabacum	defense and stress responsiveness
DACA013364	CGTCA-motif	CGTCA	400	5	+	Hordeum vulgare	MeJA-responsiveness
DACA013364	MRE	AACCTAA	1480	7	+	Petroselinum crispum	light responsive element
DACA013364	ARE	AAACCA	744	6	-	Zea mays	anaerobic induction
DACA013364	ARE	AAACCA	1466	6	+	Zea mays	anaerobic induction
DACA013364	ARE	AAACCA	1917	6	-	Zea mays	anaerobic induction
DACA013364	GATA-motif	GATAGGG	556	7	-	Pisum sativum	light responsive element
DACA013364	TCT-motif	TCTTAC	587	6	+	Arabidopsis thaliana	light responsive element
DACA013364	TCT-motif	TCTTAC	676	6	-	Arabidopsis thaliana	light responsive element
DACA013364	TCT-motif	TCTTAC	1142	6	-	Arabidopsis thaliana	light responsive element
DACA013364	TCT-motif	TCTTAC	1643	6	+	Arabidopsis thaliana	light responsive element
DACA013364	ABRE	TACGGTC	1230	7	-	Arabidopsis thaliana	abscisic acid responsiveness
DACA013364	GT1-motif	GGTTAA	425	6	+	Arabidopsis thaliana	light responsive element
DACA013364	GT1-motif	GGTTAA	427	6	-	Arabidopsis thaliana	light responsive element
DACA013364	GT1-motif	GGTTAAT	1927	7	+	Avena sativa	light responsive element
DACA013923	ACE	GACACGTATG	844	9	-	Petroselinum crispum	light responsive element
DACA013923	TGACG-motif	TGACG	339	5	-	Hordeum vulgare	MeJA-responsiveness
DACA013923	CGTCA-motif	CGTCA	339	5	+	Hordeum vulgare	MeJA-responsiveness
DACA013923	ARE	AAACCA	900	6	+	Zea mays	anaerobic induction
DACA013923	ARE	AAACCA	1004	6	+	Zea mays	anaerobic induction
DACA013923	MRE	AACCTAA	182	7	+	Petroselinum crispum	light responsive element
DACA013923	MRE	AACCTAA	1736	7	-	Petroselinum crispum	light responsive element
DACA013923	I-box	TGATAATGT	1590	9	-	Solanum tuberosum	light responsive element
DACA013923	GT1-motif	GGTTAA	77	6	+	Arabidopsis thaliana	light responsive element
DACA013923	ABRE	ACGTG	886	5	+	Arabidopsis thaliana	abscisic acid responsiveness
DACA013923	MBSI	aaaAaaC(G/C)GTTA	316	10.5	-	Petunia hybrida	flavonoid biosynthetic genes regulation
DACA013923	G-Box	CACGTT	885	6	-	Pisum sativum	light responsive element
DACA013923	MBS	CAACTG	1808	6	+	Arabidopsis thaliana	drought-inducibility
DACA013924	Box 4	ATTAAT	402	6	+	Petroselinum crispum	light responsive element
DACA013924	Box 4	ATTAAT	749	6	+	Petroselinum crispum	light responsive element
DACA013924	TCA-element	TCAGAAGAGG	506	9	-	Brassica oleracea	salicylic acid responsiveness
DACA013924	G-Box	CACGTG	1898	6	-	Pisum sativum	light responsive element
DACA013924	TATC-box	TATCCCA	195	7	+	Oryza sativa	gibberellin-responsive element
DACA013924	G-box	TACGTG	1393	6	+	Arabidopsis thaliana	light responsive element
DACA013924	G-box	CACGTG	1898	6	-	Arabidopsis thaliana	light responsive element
DACA013924	ABRE	CGTACGTGCA	1391	9	+	Hordeum vulgare	abscisic acid responsiveness
DACA013924	ABRE	ACGTG	1394	5	+	Arabidopsis thaliana	abscisic acid responsiveness
DACA013924	ABRE	CACGTG	1898	6	-	Arabidopsis thaliana	abscisic acid responsiveness
DACA013924	ABRE	ACGTG	1899	5	+	Arabidopsis thaliana	abscisic acid responsiveness
DACA013924	ARE	AAACCA	80	6	-	Zea mays	anaerobic induction
DACA013924	ARE	AAACCA	1725	6	-	Zea mays	anaerobic induction
DACA013924	MRE	AACCTAA	417	7	-	Petroselinum crispum	light responsive element
DACA013924	LTR	CCGAAA	346	6	+	Hordeum vulgare	low-temperature responsiveness
DACA015341	TGACG-motif	TGACG	802	5	+	Hordeum vulgare	MeJA-responsiveness
DACA015341	TGACG-motif	TGACG	1576	5	-	Hordeum vulgare	MeJA-responsiveness
DACA015341	CGTCA-motif	CGTCA	802	5	-	Hordeum vulgare	MeJA-responsiveness
DACA015341	CGTCA-motif	CGTCA	1576	5	+	Hordeum vulgare	MeJA-responsiveness
DACA015341	GCN4_motif	TGAGTCA	671	7	+	Oryza sativa	endosperm expression
DACA015341	MRE	AACCTAA	346	7	-	Petroselinum crispum	light responsive element
DACA015341	MRE	AACCTAA	554	7	-	Petroselinum crispum	light responsive element
DACA015341	MRE	AACCTAA	1079	7	+	Petroselinum crispum	light responsive element
DACA015341	GATA-motif	GATAGGG	72	7	-	Pisum sativum	light responsive element
DACA015341	ARE	AAACCA	1358	6	+	Zea mays	anaerobic induction
DACA015341	TCT-motif	TCTTAC	1488	6	+	Arabidopsis thaliana	light responsive element
DACA015341	I-box	cCATATCCAAT	163	10	+	Flaveria trinervia	light responsive element
DACA015341	I-box	AAGATAAGGCT	251	10	-	Gossypium hirsutum	light responsive element
DACA015341	ABRE	ACGTG	662	5	+	Arabidopsis thaliana	abscisic acid responsiveness
DACA015341	GT1-motif	GGTTAA	557	6	+	Arabidopsis thaliana	light responsive element
DACA015341	GT1-motif	GGTTAA	1121	6	+	Arabidopsis thaliana	light responsive element
DACA015341	GT1-motif	GGTTAA	1466	6	+	Arabidopsis thaliana	light responsive element
DACA015341	RY-element	CATGCATG	383	8	+	Helianthus annuus	seed-specific regulation
DACA015341	AE-box	AGAAACAA	1985	8	-	Arabidopsis thaliana	light responsive element
DACA015341	Box 4	ATTAAT	90	6	+	Petroselinum crispum	light responsive element
DACA015341	Box 4	ATTAAT	1686	6	-	Petroselinum crispum	light responsive element
DACA015341	P-box	CCTTTTG	1014	7	-	Oryza sativa	gibberellin-responsive element
DACA015341	G-Box	CACGTT	661	6	-	Pisum sativum	light responsive element
DACA015341	chs-CMA1a	TTACTTAA	953	8	-	Daucus carota	light responsive element
DACA015341	TCA-element	CCATCTTTTT	1393	9	+	Nicotiana tabacum	salicylic acid responsiveness
DACA015341	TCA-element	TCAGAAGAGG	1966	9	-	Brassica oleracea	salicylic acid responsiveness
DACA015342	CGTCA-motif	CGTCA	426	5	-	Hordeum vulgare	MeJA-responsiveness
DACA015342	GARE-motif	TCTGTTG	1260	7	-	Brassica oleracea	gibberellin-responsive element
DACA015342	Sp1	GGGCGG	1755	6	-	Oryza sativa	light responsive element
DACA015342	Sp1	GGGCGG	1760	6	-	Oryza sativa	light responsive element
DACA015342	TGACG-motif	TGACG	426	5	+	Hordeum vulgare	MeJA-responsiveness
DACA015342	ATCT-motif	AATCTAATCC	167	9	+	Pisum sativum	light responsive element
DACA015342	ATCT-motif	AATCTAATCC	1221	9	+	Pisum sativum	light responsive element
DACA015342	GT1-motif	GGTTAA	116	6	+	Arabidopsis thaliana	light responsive element
DACA015342	GT1-motif	GGTTAA	287	6	-	Arabidopsis thaliana	light responsive element
DACA015342	O2-site	GATGA(C/T)(A/G)TG(A/G)	1065	8	-	Zea mays	zein metabolism regulation
DACA015342	O2-site	GATGATGTGG	1369	9	-	Zea mays	zein metabolism regulation
DACA015342	TCT-motif	TCTTAC	496	6	+	Arabidopsis thaliana	light responsive element
DACA015342	TCT-motif	TCTTAC	1159	6	+	Arabidopsis thaliana	light responsive element
DACA015342	LTR	CCGAAA	1724	6	-	Hordeum vulgare	low-temperature responsiveness
DACA015342	ARE	AAACCA	1921	6	+	Zea mays	anaerobic induction
DACA015342	GATA-motif	AAGATAAGATT	219	10	-	Arabidopsis thaliana	light responsive element
DACA015342	TCCC-motif	TCTCCCT	464	7	-	Spinacia oleracea	light responsive element
DACA015342	Box 4	ATTAAT	85	6	+	Petroselinum crispum	light responsive element
DACA015342	Box 4	ATTAAT	700	6	+	Petroselinum crispum	light responsive element
DACA015342	Box 4	ATTAAT	749	6	+	Petroselinum crispum	light responsive element
DACA015342	Box 4	ATTAAT	1410	6	-	Petroselinum crispum	light responsive element
DACA015342	GC-motif	CCCCCG	1752	6	+	Zea mays	anoxic specific inducibility
DACA015342	GA-motif	ATAGATAA	1935	8	-	Arabidopsis thaliana	light responsive element
DACA015342	TGA-element	AACGAC	1695	6	-	Brassica oleracea	auxin-responsive element
DACA015342	TCA-element	CCATCTTTTT	1678	9	+	Nicotiana tabacum	salicylic acid responsiveness
DACA015668	TC-rich repeats	GTTTTCTTAC	1218	9	-	Nicotiana tabacum	defense and stress responsiveness
DACA015668	TGACG-motif	TGACG	1121	5	-	Hordeum vulgare	MeJA-responsiveness
DACA015668	TGACG-motif	TGACG	1845	5	+	Hordeum vulgare	MeJA-responsiveness
DACA015668	CGTCA-motif	CGTCA	1121	5	+	Hordeum vulgare	MeJA-responsiveness
DACA015668	CGTCA-motif	CGTCA	1845	5	-	Hordeum vulgare	MeJA-responsiveness
DACA015668	GARE-motif	TCTGTTG	1240	7	-	Brassica oleracea	gibberellin-responsive element
DACA015668	LTR	CCGAAA	702	6	-	Hordeum vulgare	low-temperature responsiveness
DACA015668	LTR	CCGAAA	910	6	+	Hordeum vulgare	low-temperature responsiveness
DACA015668	MRE	AACCTAA	64	7	-	Petroselinum crispum	light responsive element
DACA015668	MRE	AACCTAA	974	7	+	Petroselinum crispum	light responsive element
DACA015668	GATA-motif	GATAGGA	776	7	-	Arabidopsis thaliana	light responsive element
DACA015668	ARE	AAACCA	994	6	-	Zea mays	anaerobic induction
DACA015668	ARE	AAACCA	1523	6	-	Zea mays	anaerobic induction
DACA015668	ARE	AAACCA	1536	6	+	Zea mays	anaerobic induction
DACA015668	O2-site	GATGATGTGG	35	9	+	Zea mays	zein metabolism regulation
DACA015668	O2-site	GATGATGTGG	290	9	-	Zea mays	zein metabolism regulation
DACA015668	P-box	CCTTTTG	1081	7	+	Oryza sativa	gibberellin-responsive element
DACA015668	AuxRR-core	GGTCCAT	221	7	+	Nicotiana tabacum	auxin-responsive element
DACA015668	TATC-box	TATCCCA	761	7	+	Oryza sativa	gibberellin-responsive element
DACA015668	GA-motif	ATAGATAA	1276	8	-	Arabidopsis thaliana	light responsive element
DACA015668	TCA-element	TCAGAAGAGG	999	9	+	Brassica oleracea	salicylic acid responsiveness
DACA015668	MBS	CAACTG	676	6	-	Arabidopsis thaliana	drought-inducibility
DACA015960	G-Box	CACGTG	720	6	+	Pisum sativum	light responsive element
DACA015960	G-Box	CACGTT	1382	6	+	Pisum sativum	light responsive element
DACA015960	G-Box	CACGTG	1597	6	-	Pisum sativum	light responsive element
DACA015960	TGA-element	AACGAC	1511	6	-	Brassica oleracea	auxin-responsive element
DACA015960	AE-box	AGAAACAA	1221	8	+	Arabidopsis thaliana	light responsive element
DACA015960	AE-box	AGAAACAA	1828	8	+	Arabidopsis thaliana	light responsive element
DACA015960	TCCC-motif	TCTCCCT	734	7	-	Spinacia oleracea	light responsive element
DACA015960	TCCC-motif	TCTCCCT	1048	7	-	Spinacia oleracea	light responsive element
DACA015960	Box 4	ATTAAT	591	6	+	Petroselinum crispum	light responsive element
DACA015960	P-box	CCTTTTG	1005	7	+	Oryza sativa	gibberellin-responsive element
DACA015960	chs-CMA2a	TCACTTGA	903	8	+	Petroselinum crispum	light responsive element
DACA015960	HD-Zip 1	CAAT(A/T)ATTG	454	8.5	+	Arabidopsis thaliana	differentiation of the palisade mesophyll cells
DACA015960	ARE	AAACCA	1887	6	-	Zea mays	anaerobic induction
DACA015960	ABRE	CACGTG	720	6	+	Arabidopsis thaliana	abscisic acid responsiveness
DACA015960	ABRE	ACGTG	721	5	+	Arabidopsis thaliana	abscisic acid responsiveness
DACA015960	ABRE	ACGTG	910	5	+	Arabidopsis thaliana	abscisic acid responsiveness
DACA015960	ABRE	ACGTG	949	5	-	Arabidopsis thaliana	abscisic acid responsiveness
DACA015960	ABRE	ACGTG	1382	5	-	Arabidopsis thaliana	abscisic acid responsiveness
DACA015960	ABRE	CACGTG	1597	6	-	Arabidopsis thaliana	abscisic acid responsiveness
DACA015960	ABRE	ACGTG	1598	5	+	Arabidopsis thaliana	abscisic acid responsiveness
DACA015960	ABRE	AACCCGG	1710	7	+	Arabidopsis thaliana	abscisic acid responsiveness
DACA015960	G-box	GCCACGTGGA	718	9	+	Arabidopsis thaliana	light responsive element
DACA015960	G-box	CACGTG	720	6	+	Arabidopsis thaliana	light responsive element
DACA015960	G-box	CACGTC	909	6	-	Zea mays	light responsive element
DACA015960	G-box	TACGTG	949	6	-	Arabidopsis thaliana	light responsive element
DACA015960	G-box	CACGTG	1597	6	-	Arabidopsis thaliana	light responsive element
DACA015960	GT1-motif	GGTTAA	357	6	-	Arabidopsis thaliana	light responsive element
DACA015960	TGACG-motif	TGACG	908	5	+	Hordeum vulgare	MeJA-responsiveness
DACA015960	TGACG-motif	TGACG	1523	5	-	Hordeum vulgare	MeJA-responsiveness
DACA015960	Sp1	GGGCGG	385	6	-	Oryza sativa	light responsive element
DACA015960	CGTCA-motif	CGTCA	908	5	-	Hordeum vulgare	MeJA-responsiveness
DACA015960	CGTCA-motif	CGTCA	1523	5	+	Hordeum vulgare	MeJA-responsiveness
DACA015960	GCN4_motif	TGAGTCA	899	7	-	Oryza sativa	endosperm expression
DACA016288	ARE	AAACCA	295	6	+	Zea mays	anaerobic induction
DACA016288	ARE	AAACCA	1018	6	+	Zea mays	anaerobic induction
DACA016288	ARE	AAACCA	1828	6	+	Zea mays	anaerobic induction
DACA016288	GATA-motif	AAGGATAAGG	772	9	-	Solanum tuberosum	light responsive element
DACA016288	LTR	CCGAAA	651	6	-	Hordeum vulgare	low-temperature responsiveness
DACA016288	LTR	CCGAAA	1359	6	+	Hordeum vulgare	low-temperature responsiveness
DACA016288	LTR	CCGAAA	1427	6	+	Hordeum vulgare	low-temperature responsiveness
DACA016288	TCT-motif	TCTTAC	1083	6	+	Arabidopsis thaliana	light responsive element
DACA016288	O2-site	GATGATGTGG	1276	9	+	Zea mays	zein metabolism regulation
DACA016288	G-box	TACGTG	1171	6	+	Arabidopsis thaliana	light responsive element
DACA016288	ABRE	ACGTG	1172	5	+	Arabidopsis thaliana	abscisic acid responsiveness
DACA016288	TGACG-motif	TGACG	1175	5	+	Hordeum vulgare	MeJA-responsiveness
DACA016288	TGACG-motif	TGACG	1679	5	+	Hordeum vulgare	MeJA-responsiveness
DACA016288	GARE-motif	TCTGTTG	570	7	-	Brassica oleracea	gibberellin-responsive element
DACA016288	GCN4_motif	TGAGTCA	1890	7	+	Oryza sativa	endosperm expression
DACA016288	CGTCA-motif	CGTCA	1175	5	-	Hordeum vulgare	MeJA-responsiveness
DACA016288	CGTCA-motif	CGTCA	1679	5	-	Hordeum vulgare	MeJA-responsiveness
DACA016288	chs-CMA1a	TTACTTAA	1085	8	+	Daucus carota	light responsive element
DACA016288	TCA-element	TCAGAAGAGG	1334	9	+	Brassica oleracea	salicylic acid responsiveness
DACA016288	TCA-element	CCATCTTTTT	1735	9	-	Nicotiana tabacum	salicylic acid responsiveness
DACA016288	GA-motif	ATAGATAA	426	8	+	Arabidopsis thaliana	light responsive element
DACA016288	AE-box	AGAAACTT	604	8	+	Arabidopsis thaliana	light responsive element
DACA016288	Box 4	ATTAAT	152	6	+	Petroselinum crispum	light responsive element
DACA017212	G-Box	CACGTG	370	6	+	Pisum sativum	light responsive element
DACA017212	G-Box	CACGTT	1695	6	-	Pisum sativum	light responsive element
DACA017212	AuxRR-core	GGTCCAT	1565	7	-	Nicotiana tabacum	auxin-responsive element
DACA017212	GTGGC-motif	CATCGTGTGGC	290	10	-	Arabidopsis thaliana	light responsive element
DACA017212	GATT-motif	CTCCTGATTAGC	1263	11	+	Zea mays	light responsive element
DACA017212	chs-Unit 1 m1	ACCTAACCCGC	1273	10	-	Hordeum vulgare	light responsive element
DACA017212	GC-motif	CCCCCG	359	6	+	Zea mays	anoxic specific inducibility
DACA017212	LTR	CCGAAA	1283	6	-	Hordeum vulgare	low-temperature responsiveness
DACA017212	ABRE	CACGTG	370	6	+	Arabidopsis thaliana	abscisic acid responsiveness
DACA017212	ABRE	ACGTG	371	5	+	Arabidopsis thaliana	abscisic acid responsiveness
DACA017212	ABRE	ACGTG	1696	5	+	Arabidopsis thaliana	abscisic acid responsiveness
DACA017212	O2-site	GATGACATGG	1199	9	+	Zea mays	zein metabolism regulation
DACA017212	G-box	CACGTG	370	6	+	Arabidopsis thaliana	light responsive element
DACA017212	G-box	CACGAC	793	6	+	Zea mays	light responsive element
DACA017212	Sp1	GGGCGG	741	6	+	Oryza sativa	light responsive element
DACA017212	Sp1	GGGCGG	1288	6	+	Oryza sativa	light responsive element
DACA017212	TGACG-motif	TGACG	227	5	-	Hordeum vulgare	MeJA-responsiveness
DACA017212	TGACG-motif	TGACG	861	5	-	Hordeum vulgare	MeJA-responsiveness
DACA017212	TGACG-motif	TGACG	1342	5	+	Hordeum vulgare	MeJA-responsiveness
DACA017212	CGTCA-motif	CGTCA	227	5	+	Hordeum vulgare	MeJA-responsiveness
DACA017212	CGTCA-motif	CGTCA	861	5	+	Hordeum vulgare	MeJA-responsiveness
DACA017212	CGTCA-motif	CGTCA	1342	5	-	Hordeum vulgare	MeJA-responsiveness
DACA017378	AE-box	AGAAACTT	268	8	+	Arabidopsis thaliana	light responsive element
DACA017378	chs-CMA1a	TTACTTAA	760	8	+	Daucus carota	light responsive element
DACA017378	TCA-element	TCAGAAGAGG	1009	9	+	Brassica oleracea	salicylic acid responsiveness
DACA017378	TCA-element	CCATCTTTTT	1424	9	-	Nicotiana tabacum	salicylic acid responsiveness
DACA017378	GA-motif	ATAGATAA	90	8	+	Arabidopsis thaliana	light responsive element
DACA017378	TGACG-motif	TGACG	850	5	+	Hordeum vulgare	MeJA-responsiveness
DACA017378	TGACG-motif	TGACG	1368	5	+	Hordeum vulgare	MeJA-responsiveness
DACA017378	TGACG-motif	TGACG	1852	5	+	Hordeum vulgare	MeJA-responsiveness
DACA017378	GARE-motif	TCTGTTG	234	7	-	Brassica oleracea	gibberellin-responsive element
DACA017378	GCN4_motif	TGAGTCA	1579	7	+	Oryza sativa	endosperm expression
DACA017378	CGTCA-motif	CGTCA	850	5	-	Hordeum vulgare	MeJA-responsiveness
DACA017378	CGTCA-motif	CGTCA	1368	5	-	Hordeum vulgare	MeJA-responsiveness
DACA017378	CGTCA-motif	CGTCA	1852	5	-	Hordeum vulgare	MeJA-responsiveness
DACA017378	GATA-motif	AAGGATAAGG	438	9	-	Solanum tuberosum	light responsive element
DACA017378	ARE	AAACCA	693	6	+	Zea mays	anaerobic induction
DACA017378	ARE	AAACCA	1517	6	+	Zea mays	anaerobic induction
DACA017378	LTR	CCGAAA	315	6	-	Hordeum vulgare	low-temperature responsiveness
DACA017378	LTR	CCGAAA	1106	6	+	Hordeum vulgare	low-temperature responsiveness
DACA017378	TCT-motif	TCTTAC	758	6	+	Arabidopsis thaliana	light responsive element
DACA017378	G-box	TACGTG	846	6	+	Arabidopsis thaliana	light responsive element
DACA017378	O2-site	GATGATGTGG	951	9	+	Zea mays	zein metabolism regulation
DACA017378	ABRE	ACGTG	847	5	+	Arabidopsis thaliana	abscisic acid responsiveness
DACA017499	TC-rich repeats	GTTTTCTTAC	467	9	+	Nicotiana tabacum	defense and stress responsiveness
DACA017499	TC-rich repeats	ATTCTCTAAC	1786	9	+	Nicotiana tabacum	defense and stress responsiveness
DACA017499	ABRE	CACGTG	1661	6	-	Arabidopsis thaliana	abscisic acid responsiveness
DACA017499	ABRE	ACGTG	1662	5	+	Arabidopsis thaliana	abscisic acid responsiveness
DACA017499	G-box	CACGTG	1661	6	-	Arabidopsis thaliana	light responsive element
DACA017499	HD-Zip 1	CAAT(A/T)ATTG	1526	8	-	Arabidopsis thaliana	differentiation of the palisade mesophyll cells
DACA017499	ARE	AAACCA	1316	6	-	Zea mays	anaerobic induction
DACA017499	ARE	AAACCA	1975	6	-	Zea mays	anaerobic induction
DACA017499	L-box	ATCCCACCTAC	1612	10	+	Petroselinum crispum	light responsive element
DACA017499	AAAC-motif	CAATCAAAACCT	1975	11	-	Spinacia oleracea	light responsive element
DACA017499	Box 4	ATTAAT	28	6	+	Petroselinum crispum	light responsive element
DACA017499	Box 4	ATTAAT	704	6	+	Petroselinum crispum	light responsive element
DACA017499	Box 4	ATTAAT	902	6	+	Petroselinum crispum	light responsive element
DACA017499	Box 4	ATTAAT	1222	6	-	Petroselinum crispum	light responsive element
DACA017499	Box 4	ATTAAT	1608	6	-	Petroselinum crispum	light responsive element
DACA017499	AT1-motif	AATTATTTTTTATT	1562	13	-	Solanum tuberosum	light responsive element
DACA017499	chs-Unit 1 m1	ACCTAACCCGC	970	10	+	Hordeum vulgare	light responsive element
DACA017499	G-Box	CACGTG	1661	6	-	Pisum sativum	light responsive element
DACA017576	P-box	CCTTTTG	1021	7	-	Oryza sativa	gibberellin-responsive element
DACA017576	Box 4	ATTAAT	1759	6	-	Petroselinum crispum	light responsive element
DACA017576	AE-box	AGAAACAA	1016	8	+	Arabidopsis thaliana	light responsive element
DACA017576	chs-Unit 1 m1	ACCTAACCCGG	1571	10	-	Zea mays	light responsive element
DACA017576	GA-motif	ATAGATAA	1766	8	-	Arabidopsis thaliana	light responsive element
DACA017576	MBS	CAACTG	35	6	+	Arabidopsis thaliana	drought-inducibility
DACA017576	TGA-element	AACGAC	1204	6	-	Brassica oleracea	auxin-responsive element
DACA017576	TCA-element	CCATCTTTTT	1155	9	+	Nicotiana tabacum	salicylic acid responsiveness
DACA017576	AuxRR-core	GGTCCAT	394	7	-	Nicotiana tabacum	auxin-responsive element
DACA017576	chs-CMA1a	TTACTTAA	1645	8	-	Daucus carota	light responsive element
DACA017576	CGTCA-motif	CGTCA	406	5	-	Hordeum vulgare	MeJA-responsiveness
DACA017576	CGTCA-motif	CGTCA	1673	5	+	Hordeum vulgare	MeJA-responsiveness
DACA017576	TGACG-motif	TGACG	406	5	+	Hordeum vulgare	MeJA-responsiveness
DACA017576	TGACG-motif	TGACG	1673	5	-	Hordeum vulgare	MeJA-responsiveness
DACA017576	G-box	CACGTC	407	6	-	Zea mays	light responsive element
DACA017576	GT1-motif	GGTTAAT	999	7	+	Avena sativa	light responsive element
DACA017576	GT1-motif	GGTTAAT	1146	7	+	Avena sativa	light responsive element
DACA017576	O2-site	GTTGACGTGA	404	9	+	Zea mays	zein metabolism regulation
DACA017576	O2-site	GATGATGTGG	713	9	+	Zea mays	zein metabolism regulation
DACA017576	ABRE	ACGTG	408	5	+	Arabidopsis thaliana	abscisic acid responsiveness
DACA017576	ABRE	TACGGTC	1692	7	-	Arabidopsis thaliana	abscisic acid responsiveness
DACA017576	I-box	TGATAATGT	1372	9	+	Solanum tuberosum	light responsive element
DACA017576	ARE	AAACCA	751	6	+	Zea mays	anaerobic induction
DACA017576	ARE	AAACCA	1075	6	-	Zea mays	anaerobic induction
DACA017576	MRE	AACCTAA	312	7	-	Petroselinum crispum	light responsive element
DACA017576	LTR	CCGAAA	1009	6	+	Hordeum vulgare	low-temperature responsiveness
DACA018089	TCT-motif	TCTTAC	152	6	+	Arabidopsis thaliana	light responsive element
DACA018089	TCT-motif	TCTTAC	1056	6	+	Arabidopsis thaliana	light responsive element
DACA018089	TCT-motif	TCTTAC	1538	6	+	Arabidopsis thaliana	light responsive element
DACA018089	I-box	GTATAAGGCC	575	9	-	Larix laricina	light responsive element
DACA018089	ARE	AAACCA	721	6	-	Zea mays	anaerobic induction
DACA018089	ARE	AAACCA	796	6	-	Zea mays	anaerobic induction
DACA018089	3-AF1 binding site	TAAGAGAGGAA	1980	10	-	Solanum tuberosum	light responsive element
DACA018089	MRE	AACCTAA	1638	7	-	Petroselinum crispum	light responsive element
DACA018089	MRE	AACCTAA	1665	7	-	Petroselinum crispum	light responsive element
DACA018089	O2-site	GATGATGTGG	493	9	+	Zea mays	zein metabolism regulation
DACA018089	O2-site	GATGATGTGG	1889	9	-	Zea mays	zein metabolism regulation
DACA018089	GT1-motif	GGTTAA	1189	6	-	Arabidopsis thaliana	light responsive element
DACA018089	CAT-box	GCCACT	487	6	+	Arabidopsis thaliana	meristem expression
DACA018089	TGACG-motif	TGACG	1352	5	+	Hordeum vulgare	MeJA-responsiveness
DACA018089	CGTCA-motif	CGTCA	1352	5	-	Hordeum vulgare	MeJA-responsiveness
DACA018089	MSA-like	(T/C)C(T/C)AACGG(T/C)(T/C)A	1897	8.5	+	Catharanthus roseus	cell cycle regulation
DACA018089	MBS	CAACTG	10	6	-	Arabidopsis thaliana	drought-inducibility
DACA018089	TCA-element	TCAGAAGAGG	261	9	+	Brassica oleracea	salicylic acid responsiveness
DACA018089	TCA-element	CCATCTTTTT	1442	9	+	Nicotiana tabacum	salicylic acid responsiveness
DACA018089	TCA-element	TCAGAAGAGG	1547	9	+	Brassica oleracea	salicylic acid responsiveness
DACA018089	GTGGC-motif	CAGCGTGTGGC	1399	10	-	Hordeum vulgare	light responsive element
DACA018089	Box 4	ATTAAT	605	6	+	Petroselinum crispum	light responsive element
DACA018179	AT1-motif	AATTATTTTTTATT	1182	13	+	Solanum tuberosum	light responsive element
DACA018179	SARE	TTCGACCATCTT	1043	11	-	Nicotiana tabacum	salicylic acid responsiveness
DACA018179	Box 4	ATTAAT	148	6	+	Petroselinum crispum	light responsive element
DACA018179	Box 4	ATTAAT	602	6	+	Petroselinum crispum	light responsive element
DACA018179	Box 4	ATTAAT	1534	6	-	Petroselinum crispum	light responsive element
DACA018179	AE-box	AGAAACTT	1270	8	-	Arabidopsis thaliana	light responsive element
DACA018179	MBS	CAACTG	1512	6	+	Arabidopsis thaliana	drought-inducibility
DACA018179	MBS	CAACTG	1760	6	+	Arabidopsis thaliana	drought-inducibility
DACA018179	TCA-element	CCATCTTTTT	1325	9	-	Nicotiana tabacum	salicylic acid responsiveness
DACA018179	G-Box	CACGTT	14	6	-	Pisum sativum	light responsive element
DACA018179	G-Box	CACGTT	407	6	+	Pisum sativum	light responsive element
DACA018179	GCN4_motif	TGAGTCA	28	7	-	Oryza sativa	endosperm expression
DACA018179	CGTCA-motif	CGTCA	1820	5	+	Hordeum vulgare	MeJA-responsiveness
DACA018179	Sp1	GGGCGG	426	6	+	Oryza sativa	light responsive element
DACA018179	Sp1	GGGCGG	1012	6	+	Oryza sativa	light responsive element
DACA018179	TGACG-motif	TGACG	1820	5	-	Hordeum vulgare	MeJA-responsiveness
DACA018179	ABRE	ACGTG	15	5	+	Arabidopsis thaliana	abscisic acid responsiveness
DACA018179	ABRE	ACGTG	407	5	-	Arabidopsis thaliana	abscisic acid responsiveness
DACA018179	ARE	AAACCA	1028	6	+	Zea mays	anaerobic induction
DACA018179	ARE	AAACCA	1521	6	-	Zea mays	anaerobic induction
DACA018421	TC-rich repeats	ATTCTCTAAC	1429	9	-	Nicotiana tabacum	defense and stress responsiveness
DACA018421	TC-rich repeats	ATTCTCTAAC	1481	9	+	Nicotiana tabacum	defense and stress responsiveness
DACA018421	TGACG-motif	TGACG	144	5	-	Hordeum vulgare	MeJA-responsiveness
DACA018421	TGACG-motif	TGACG	840	5	+	Hordeum vulgare	MeJA-responsiveness
DACA018421	Sp1	GGGCGG	1729	6	+	Oryza sativa	light responsive element
DACA018421	CGTCA-motif	CGTCA	144	5	+	Hordeum vulgare	MeJA-responsiveness
DACA018421	CGTCA-motif	CGTCA	840	5	-	Hordeum vulgare	MeJA-responsiveness
DACA018421	ARE	AAACCA	1349	6	-	Zea mays	anaerobic induction
DACA018421	ABRE	ACGTG	365	5	-	Arabidopsis thaliana	abscisic acid responsiveness
DACA018421	ABRE	CACGTG	727	6	+	Arabidopsis thaliana	abscisic acid responsiveness
DACA018421	ABRE	ACGTG	728	5	+	Arabidopsis thaliana	abscisic acid responsiveness
DACA018421	ABRE	CACGTG	773	6	+	Arabidopsis thaliana	abscisic acid responsiveness
DACA018421	ABRE	ACGTG	774	5	+	Arabidopsis thaliana	abscisic acid responsiveness
DACA018421	ABRE	ACGTG	867	5	+	Arabidopsis thaliana	abscisic acid responsiveness
DACA018421	ABRE	ACGTG	1364	5	-	Arabidopsis thaliana	abscisic acid responsiveness
DACA018421	G-box	TACGTG	365	6	-	Arabidopsis thaliana	light responsive element
DACA018421	G-box	CACGAC	669	6	+	Zea mays	light responsive element
DACA018421	G-box	CACGAC	712	6	+	Zea mays	light responsive element
DACA018421	G-box	CACGTG	727	6	+	Arabidopsis thaliana	light responsive element
DACA018421	G-box	CACGTG	773	6	+	Arabidopsis thaliana	light responsive element
DACA018421	G-box	TACGTG	866	6	+	Arabidopsis thaliana	light responsive element
DACA018421	G-box	TACGTG	1364	6	-	Arabidopsis thaliana	light responsive element
DACA018421	G-box	CACGAC	1845	6	-	Zea mays	light responsive element
DACA018421	GC-motif	CCCCCG	1399	6	+	Zea mays	anoxic specific inducibility
DACA018421	TCCC-motif	TCTCCCT	1301	7	-	Spinacia oleracea	light responsive element
DACA018421	TCCC-motif	TCTCCCT	1824	7	+	Spinacia oleracea	light responsive element
DACA018421	AuxRR-core	GGTCCAT	1574	7	-	Nicotiana tabacum	auxin-responsive element
DACA018421	G-Box	CACGTG	727	6	+	Pisum sativum	light responsive element
DACA018421	G-Box	CACGTG	773	6	+	Pisum sativum	light responsive element
DACA018421	TGA-element	AACGAC	885	6	-	Brassica oleracea	auxin-responsive element
DACA018421	GCN4_motif	TGAGTCA	1126	7	-	Oryza sativa	endosperm expression
DACA018421	I-box	cCATATCCAAT	55	10	-	Flaveria trinervia	light responsive element
DACA018421	LTR	CCGAAA	1745	6	-	Hordeum vulgare	low-temperature responsiveness
DACA018421	GATA-motif	GATAGGG	1862	7	+	Pisum sativum	light responsive element
DACA018421	GT1-motif	GGTTAA	1312	6	+	Arabidopsis thaliana	light responsive element
DACA018421	GT1-motif	GGTTAAT	1783	7	-	Avena sativa	light responsive element
DACA018421	GT1-motif	GGTTAA	1784	6	-	Arabidopsis thaliana	light responsive element
DACA018421	ATC-motif	AGTAATCT	560	8	+	Spinacia oleracea	light responsive element
DACA018421	Box 4	ATTAAT	106	6	+	Petroselinum crispum	light responsive element
DACA018421	Box 4	ATTAAT	353	6	+	Petroselinum crispum	light responsive element
DACA018421	Box 4	ATTAAT	495	6	+	Petroselinum crispum	light responsive element
DACA018421	Box 4	ATTAAT	946	6	+	Petroselinum crispum	light responsive element
DACA018421	Box 4	ATTAAT	1324	6	-	Petroselinum crispum	light responsive element
DACA018421	TGA-box	TGACGTAA	141	8	-	Glycine max	auxin-responsive element
DACA018421	TCA-element	CCATCTTTTT	256	9	-	Nicotiana tabacum	salicylic acid responsiveness
DACA018421	TCA-element	CCATCTTTTT	1201	9	+	Nicotiana tabacum	salicylic acid responsiveness
DACA018421	MBS	CAACTG	1526	6	-	Arabidopsis thaliana	drought-inducibility
DACA020351	AE-box	AGAAACAA	1602	8	-	Arabidopsis thaliana	light responsive element
DACA020351	GC-motif	CCCCCG	3	6	+	Zea mays	anoxic specific inducibility
DACA020351	TCCC-motif	TCTCCCT	52	7	-	Spinacia oleracea	light responsive element
DACA020351	Box 4	ATTAAT	344	6	+	Petroselinum crispum	light responsive element
DACA020351	Box 4	ATTAAT	393	6	+	Petroselinum crispum	light responsive element
DACA020351	Box 4	ATTAAT	1414	6	-	Petroselinum crispum	light responsive element
DACA020351	TGACG-motif	TGACG	1963	5	-	Hordeum vulgare	MeJA-responsiveness
DACA020351	Sp1	GGGCGG	798	6	+	Oryza sativa	light responsive element
DACA020351	CGTCA-motif	CGTCA	1963	5	+	Hordeum vulgare	MeJA-responsiveness
DACA020351	GARE-motif	TCTGTTG	701	7	-	Brassica oleracea	gibberellin-responsive element
DACA020351	GATA-motif	GATAGGG	1524	7	-	Pisum sativum	light responsive element
DACA020351	ARE	AAACCA	548	6	-	Zea mays	anaerobic induction
DACA020351	ARE	AAACCA	973	6	+	Zea mays	anaerobic induction
DACA020351	ARE	AAACCA	1666	6	-	Zea mays	anaerobic induction
DACA020351	O2-site	GATGACATGG	1296	9	+	Zea mays	zein metabolism regulation
DACA020351	O2-site	GATGA(C/T)(A/G)TG(A/G)	1619	8	-	Zea mays	zein metabolism regulation
DACA020352	TCCC-motif	TCTCCCT	1429	7	+	Spinacia oleracea	light responsive element
DACA020352	ATC-motif	AGTAATCT	516	8	-	Spinacia oleracea	light responsive element
DACA020352	circadian	CAAAGATATC	569	9	+	Lycopersicon esculentum	circadian control
DACA020352	MBS	CAACTG	1143	6	+	Arabidopsis thaliana	drought-inducibility
DACA020352	CAT-box	GCCACT	929	6	+	Arabidopsis thaliana	meristem expression
DACA020352	TC-rich repeats	ATTCTCTAAC	1097	9	+	Nicotiana tabacum	defense and stress responsiveness
DACA020352	TGACG-motif	TGACG	831	5	-	Hordeum vulgare	MeJA-responsiveness
DACA020352	CGTCA-motif	CGTCA	831	5	+	Hordeum vulgare	MeJA-responsiveness
DACA020352	GARE-motif	TCTGTTG	1079	7	-	Brassica oleracea	gibberellin-responsive element
DACA020352	I-box	TGATAATGT	1976	9	-	Solanum tuberosum	light responsive element
DACA020352	LTR	CCGAAA	1445	6	+	Hordeum vulgare	low-temperature responsiveness
DACA020352	ARE	AAACCA	873	6	+	Zea mays	anaerobic induction
DACA020352	GT1-motif	GTGTGTGAA	1260	9	-	Solanum tuberosum	light responsive element
DACA020352	GT1-motif	GGTTAA	1659	6	+	Arabidopsis thaliana	light responsive element
DACA020352	G-box	CACGAC	556	6	+	Zea mays	light responsive element
DACA020879	G-Box	CACGTG	1885	6	-	Pisum sativum	light responsive element
DACA020879	chs-CMA1a	TTACTTAA	345	8	-	Daucus carota	light responsive element
DACA020879	GA-motif	ATAGATAA	1950	8	-	Arabidopsis thaliana	light responsive element
DACA020879	AACA_motif	TAACAAACTCCA	1502	11	-	Oryza sativa	endosperm expression
DACA020879	AE-box	AGAAACAA	1682	8	+	Arabidopsis thaliana	light responsive element
DACA020879	Box 4	ATTAAT	77	6	+	Petroselinum crispum	light responsive element
DACA020879	Box 4	ATTAAT	84	6	+	Petroselinum crispum	light responsive element
DACA020879	Box 4	ATTAAT	775	6	+	Petroselinum crispum	light responsive element
DACA020879	Box 4	ATTAAT	842	6	+	Petroselinum crispum	light responsive element
DACA020879	Box 4	ATTAAT	846	6	+	Petroselinum crispum	light responsive element
DACA020879	Box 4	ATTAAT	1010	6	-	Petroselinum crispum	light responsive element
DACA020879	Box 4	ATTAAT	1014	6	-	Petroselinum crispum	light responsive element
DACA020879	Box 4	ATTAAT	1130	6	-	Petroselinum crispum	light responsive element
DACA020879	Box 4	ATTAAT	1335	6	-	Petroselinum crispum	light responsive element
DACA020879	Box 4	ATTAAT	1651	6	-	Petroselinum crispum	light responsive element
DACA020879	TCT-motif	TCTTAC	1841	6	+	Arabidopsis thaliana	light responsive element
DACA020879	I-box	cCATATCCAAT	429	10	+	Flaveria trinervia	light responsive element
DACA020879	I-box	cCATATCCAAT	533	10	+	Flaveria trinervia	light responsive element
DACA020879	ARE	AAACCA	95	6	+	Zea mays	anaerobic induction
DACA020879	ARE	AAACCA	210	6	-	Zea mays	anaerobic induction
DACA020879	ARE	AAACCA	1476	6	+	Zea mays	anaerobic induction
DACA020879	ARE	AAACCA	1522	6	-	Zea mays	anaerobic induction
DACA020879	ARE	AAACCA	1548	6	+	Zea mays	anaerobic induction
DACA020879	ARE	AAACCA	1903	6	-	Zea mays	anaerobic induction
DACA020879	HD-Zip 1	CAAT(A/T)ATTG	1735	8.5	-	Arabidopsis thaliana	differentiation of the palisade mesophyll cells
DACA020879	G-box	CACGTG	1885	6	-	Arabidopsis thaliana	light responsive element
DACA020879	GT1-motif	GGTTAAT	562	7	-	Avena sativa	light responsive element
DACA020879	GT1-motif	GGTTAA	563	6	-	Arabidopsis thaliana	light responsive element
DACA020879	ABRE	CACGTG	1885	6	-	Arabidopsis thaliana	abscisic acid responsiveness
DACA020879	ABRE	ACGTG	1886	5	+	Arabidopsis thaliana	abscisic acid responsiveness
DACA020879	CAT-box	GCCACT	110	6	+	Arabidopsis thaliana	meristem expression
DACA021755	MBS	CAACTG	546	6	+	Arabidopsis thaliana	drought-inducibility
DACA021755	TCA-element	TCAGAAGAGG	1945	9	-	Brassica oleracea	salicylic acid responsiveness
DACA021755	circadian	CAAAGATATC	946	9	-	Lycopersicon esculentum	circadian control
DACA021755	AuxRR-core	GGTCCAT	1077	7	+	Nicotiana tabacum	auxin-responsive element
DACA021755	G-box	CACGTC	1802	6	-	Zea mays	light responsive element
DACA021755	O2-site	GATGATGTGG	245	9	-	Zea mays	zein metabolism regulation
DACA021755	ABRE	ACGTG	1803	5	+	Arabidopsis thaliana	abscisic acid responsiveness
DACA021755	TCT-motif	TCTTAC	909	6	+	Arabidopsis thaliana	light responsive element
DACA021755	3-AF1 binding site	TAAGAGAGGAA	91	10	-	Solanum tuberosum	light responsive element
DACA021755	ARE	AAACCA	87	6	-	Zea mays	anaerobic induction
DACA021755	ARE	AAACCA	962	6	-	Zea mays	anaerobic induction
DACA021755	CGTCA-motif	CGTCA	799	5	+	Hordeum vulgare	MeJA-responsiveness
DACA021755	TGACG-motif	TGACG	799	5	-	Hordeum vulgare	MeJA-responsiveness
DACA021755	Sp1	GGGCGG	1537	6	+	Oryza sativa	light responsive element
DACA021755	Sp1	GGGCGG	1807	6	+	Oryza sativa	light responsive element
DACA021755	Sp1	GGGCGG	1858	6	-	Oryza sativa	light responsive element
DACA022106	DRE	TACCGACAT	1610	9	-	Arabidopsis thaliana	dehydration, low-temp, salt stresses_x000D_
DACA022171	TCT-motif	TCTTAC	112	6	-	Arabidopsis thaliana	light responsive element
DACA022171	GT1-motif	GGTTAA	640	6	-	Arabidopsis thaliana	light responsive element
DACA022171	CAT-box	GCCACT	815	6	-	Arabidopsis thaliana	meristem expression
DACA022171	CAT-box	GCCACT	1511	6	-	Arabidopsis thaliana	meristem expression
DACA022171	MSA-like	(T/C)C(T/C)AACGG(T/C)(T/C)A	693	9	-	Catharanthus roseus	cell cycle regulation
DACA022171	MBS	CAACTG	457	6	+	Arabidopsis thaliana	drought-inducibility
DACA022171	MBS	CAACTG	1182	6	+	Arabidopsis thaliana	drought-inducibility
DACA022171	MBS	CAACTG	1464	6	+	Arabidopsis thaliana	drought-inducibility
DACA022171	TCA-element	CCATCTTTTT	1640	9	+	Nicotiana tabacum	salicylic acid responsiveness
DACA022171	AE-box	AGAAACAA	145	8	-	Arabidopsis thaliana	light responsive element
DACA022171	Box 4	ATTAAT	1856	6	-	Petroselinum crispum	light responsive element
DACA022464	TGA-element	AACGAC	401	6	+	Brassica oleracea	auxin-responsive element
DACA022464	Box 4	ATTAAT	18	6	+	Petroselinum crispum	light responsive element
DACA022464	Box 4	ATTAAT	1120	6	-	Petroselinum crispum	light responsive element
DACA022464	Box 4	ATTAAT	1400	6	-	Petroselinum crispum	light responsive element
DACA022464	Box 4	ATTAAT	1573	6	-	Petroselinum crispum	light responsive element
DACA022464	Box 4	ATTAAT	1756	6	-	Petroselinum crispum	light responsive element
DACA022464	AT1-motif	AATTATTTTTTATT	1378	13	+	Solanum tuberosum	light responsive element
DACA022464	ARE	AAACCA	1104	6	+	Zea mays	anaerobic induction
DACA022464	ABRE	ACGTG	1664	5	+	Arabidopsis thaliana	abscisic acid responsiveness
DACA022464	G-box	CACGTC	1663	6	-	Zea mays	light responsive element
DACA022464	O2-site	GATGATGTGG	1986	9	+	Zea mays	zein metabolism regulation
DACA022464	TGACG-motif	TGACG	1662	5	+	Hordeum vulgare	MeJA-responsiveness
DACA022464	CGTCA-motif	CGTCA	1662	5	-	Hordeum vulgare	MeJA-responsiveness
DACA023137	TCA-element	CCATCTTTTT	1129	9	-	Nicotiana tabacum	salicylic acid responsiveness
DACA023137	GTGGC-motif	GATTCTGTGGC	1030	10	-	Spinacia oleracea	light responsive element
DACA023137	Box 4	ATTAAT	68	6	+	Petroselinum crispum	light responsive element
DACA023137	Box 4	ATTAAT	1660	6	-	Petroselinum crispum	light responsive element
DACA023137	GATA-motif	AAGATAAGATT	146	10	-	Arabidopsis thaliana	light responsive element
DACA023137	ARE	AAACCA	264	6	+	Zea mays	anaerobic induction
DACA023137	ARE	AAACCA	383	6	+	Zea mays	anaerobic induction
DACA023137	ARE	AAACCA	502	6	+	Zea mays	anaerobic induction
DACA023137	ARE	AAACCA	621	6	+	Zea mays	anaerobic induction
DACA023137	ARE	AAACCA	798	6	+	Zea mays	anaerobic induction
DACA023137	ARE	AAACCA	1332	6	-	Zea mays	anaerobic induction
DACA023137	ARE	AAACCA	1979	6	-	Zea mays	anaerobic induction
DACA023137	ATCT-motif	AATCTAATCC	146	9	+	Pisum sativum	light responsive element
DACA023137	O2-site	GATGATGTGG	1564	9	+	Zea mays	zein metabolism regulation
DACA023137	ABRE	AACCCGG	1235	7	-	Arabidopsis thaliana	abscisic acid responsiveness
DACA023137	TC-rich repeats	GTTTTCTTAC	825	9	-	Nicotiana tabacum	defense and stress responsiveness
DACA023137	TGACG-motif	TGACG	709	5	-	Hordeum vulgare	MeJA-responsiveness
DACA023137	TGACG-motif	TGACG	896	5	-	Hordeum vulgare	MeJA-responsiveness
DACA023137	TGACG-motif	TGACG	925	5	-	Hordeum vulgare	MeJA-responsiveness
DACA023137	TGACG-motif	TGACG	1007	5	-	Hordeum vulgare	MeJA-responsiveness
DACA023137	CGTCA-motif	CGTCA	709	5	+	Hordeum vulgare	MeJA-responsiveness
DACA023137	CGTCA-motif	CGTCA	896	5	+	Hordeum vulgare	MeJA-responsiveness
DACA023137	CGTCA-motif	CGTCA	925	5	+	Hordeum vulgare	MeJA-responsiveness
DACA023137	CGTCA-motif	CGTCA	1007	5	+	Hordeum vulgare	MeJA-responsiveness
DACA023137	GARE-motif	TCTGTTG	1039	7	+	Brassica oleracea	gibberellin-responsive element
DACA023137	GARE-motif	TCTGTTG	1212	7	+	Brassica oleracea	gibberellin-responsive element
DACA025095	Box 4	ATTAAT	350	6	+	Petroselinum crispum	light responsive element
DACA025095	Box 4	ATTAAT	399	6	+	Petroselinum crispum	light responsive element
DACA025095	Box 4	ATTAAT	1420	6	-	Petroselinum crispum	light responsive element
DACA025095	TCCC-motif	TCTCCCT	58	7	-	Spinacia oleracea	light responsive element
DACA025095	GC-motif	CCCCCG	9	6	+	Zea mays	anoxic specific inducibility
DACA025095	AE-box	AGAAACAA	1608	8	-	Arabidopsis thaliana	light responsive element
DACA025095	O2-site	GATGACATGG	1302	9	+	Zea mays	zein metabolism regulation
DACA025095	O2-site	GATGA(C/T)(A/G)TG(A/G)	1625	8	-	Zea mays	zein metabolism regulation
DACA025095	ARE	AAACCA	554	6	-	Zea mays	anaerobic induction
DACA025095	ARE	AAACCA	979	6	+	Zea mays	anaerobic induction
DACA025095	ARE	AAACCA	1672	6	-	Zea mays	anaerobic induction
DACA025095	GATA-motif	GATAGGG	1530	7	-	Pisum sativum	light responsive element
DACA025095	GARE-motif	TCTGTTG	707	7	-	Brassica oleracea	gibberellin-responsive element
DACA025095	CGTCA-motif	CGTCA	1969	5	+	Hordeum vulgare	MeJA-responsiveness
DACA025095	Sp1	GGGCGG	804	6	+	Oryza sativa	light responsive element
DACA025095	TGACG-motif	TGACG	1969	5	-	Hordeum vulgare	MeJA-responsiveness

## Sheet: Ac. calamus
ID	Type	Sequence	Starting site	Ending site		Species	Function
CP_A01g00952	MBS	CAACTG	503	6	+	Arabidopsis thaliana	drought-inducibility
CP_A01g00952	MBS	CAACTG	1270	6	+	Arabidopsis thaliana	drought-inducibility
CP_A01g00952	MBS	CAACTG	1824	6	+	Arabidopsis thaliana	drought-inducibility
CP_A01g00952	HD-Zip 1	CAAT(A/T)ATTG	364	8	+	Arabidopsis thaliana	palisade mesophyll cells
CP_A01g00952	HD-Zip 1	CAAT(A/T)ATTG	1908	8.5	-	Arabidopsis thaliana	palisade mesophyll cells
CP_A01g00952	ABRE	ACGTG	171	5	-	Arabidopsis thaliana	abscisic acid responsiveness
CP_A01g00952	RY-element	CATGCATG	1429	8	-	Helianthus annuus	seed-specific regulation
CP_A01g00952	SARE	TTCGACCATCTT	808	11	-	Nicotiana tabacum	salicylic acid responsiveness
CP_A01g00952	TCA-element	CCATCTTTTT	1084	9	-	Nicotiana tabacum	salicylic acid responsiveness
CP_A01g00952	G-Box	CACGTT	171	6	+	Pisum sativum	light responsive element
CP_A01g00952	GARE-motif	TCTGTTG	1918	7	-	Brassica oleracea	gibberellin-responsive element
CP_A01g00952	Box 4	ATTAAT	1292	6	-	Petroselinum crispum	light responsive element
CP_A01g00952	ATC-motif	AGTAATCT	1962	8	-	Spinacia oleracea	light responsive element
CP_A01g00952	ARE	AAACCA	793	6	+	Zea mays	anaerobic induction
CP_A01g00952	AE-box	AGAAACTT	477	8	-	Arabidopsis thaliana	light responsive element
CP_A01g00952	AE-box	AGAAACTT	1034	8	-	Arabidopsis thaliana	light responsive element
CP_A01g01358	Box 4	ATTAAT	1159	6	-	Petroselinum crispum	light responsive element
CP_A01g01358	G-Box	CACGTG	300	6	+	Pisum sativum	light responsive element
CP_A01g01358	G-Box	CACGTG	383	6	+	Pisum sativum	light responsive element
CP_A01g01358	G-Box	CACGTT	986	6	-	Pisum sativum	light responsive element
CP_A01g01358	O2-site	GATGACATGG	361	9	-	Zea mays	zein metabolism regulation
CP_A01g01358	O2-site	GATGA(C/T)(A/G)TG(A/G)	991	8	+	Zea mays	zein metabolism regulation
CP_A01g01358	O2-site	GTTGACGTGA	1410	9	+	Zea mays	zein metabolism regulation
CP_A01g01358	O2-site	GATGATGTGG	1696	9	+	Zea mays	zein metabolism regulation
CP_A01g01358	G-box	GCCACGTGGA	298	9	-	Arabidopsis thaliana	light responsive element
CP_A01g01358	G-box	CACGTG	300	6	+	Arabidopsis thaliana	light responsive element
CP_A01g01358	G-box	TACGTG	335	6	+	Arabidopsis thaliana	light responsive element
CP_A01g01358	G-box	CACGTG	383	6	+	Arabidopsis thaliana	light responsive element
CP_A01g01358	G-box	CACGTC	1413	6	-	Zea mays	light responsive element
CP_A01g01358	AT1-motif	AATTATTTTTTATT	1235	13	-	Solanum tuberosum	light responsive element
CP_A01g01358	TCA-element	TCAGAAGAGG	1509	9	+	Brassica oleracea	salicylic acid responsiveness
CP_A01g01358	GC-motif	CCCCCG	1332	6	-	Zea mays	anaerobic induction
CP_A01g01358	CGTCA-motif	CGTCA	433	5	+	Hordeum vulgare	MeJA-responsiveness
CP_A01g01358	CGTCA-motif	CGTCA	1412	5	-	Hordeum vulgare	MeJA-responsiveness
CP_A01g01358	CGTCA-motif	CGTCA	1620	5	+	Hordeum vulgare	MeJA-responsiveness
CP_A01g01358	CGTCA-motif	CGTCA	1902	5	+	Hordeum vulgare	MeJA-responsiveness
CP_A01g01358	TGACG-motif	TGACG	433	5	-	Hordeum vulgare	MeJA-responsiveness
CP_A01g01358	TGACG-motif	TGACG	1412	5	+	Hordeum vulgare	MeJA-responsiveness
CP_A01g01358	TGACG-motif	TGACG	1620	5	-	Hordeum vulgare	MeJA-responsiveness
CP_A01g01358	TGACG-motif	TGACG	1902	5	-	Hordeum vulgare	MeJA-responsiveness
CP_A01g01358	ARE	AAACCA	1734	6	+	Zea mays	anaerobic induction
CP_A01g01358	LTR	CCGAAA	420	6	+	Hordeum vulgare	low-temperature responsiveness
CP_A01g01358	LTR	CCGAAA	482	6	+	Hordeum vulgare	low-temperature responsiveness
CP_A01g01358	LTR	CCGAAA	953	6	+	Hordeum vulgare	low-temperature responsiveness
CP_A01g01358	LTR	CCGAAA	1992	6	+	Hordeum vulgare	low-temperature responsiveness
CP_A01g01358	MBS	CAACTG	1068	6	+	Arabidopsis thaliana	drought-inducibility
CP_A01g01358	TCCC-motif	TCTCCCT	1501	7	+	Spinacia oleracea	light responsive element
CP_A01g01358	ABRE	GACACGTGGC	298	9	-	Triticum aestivum	abscisic acid responsiveness
CP_A01g01358	ABRE	CACGTG	300	6	+	Arabidopsis thaliana	abscisic acid responsiveness
CP_A01g01358	ABRE	ACGTG	301	5	+	Arabidopsis thaliana	abscisic acid responsiveness
CP_A01g01358	ABRE	ACGTG	336	5	+	Arabidopsis thaliana	abscisic acid responsiveness
CP_A01g01358	ABRE	CGCACGTGTC	381	9	+	Hordeum vulgare	abscisic acid responsiveness
CP_A01g01358	ABRE	CACGTG	383	6	+	Arabidopsis thaliana	abscisic acid responsiveness
CP_A01g01358	ABRE	ACGTG	384	5	+	Arabidopsis thaliana	abscisic acid responsiveness
CP_A01g01358	ABRE	ACGTG	987	5	+	Arabidopsis thaliana	abscisic acid responsiveness
CP_A01g01358	ABRE	ACGTG	1414	5	+	Arabidopsis thaliana	abscisic acid responsiveness
CP_A01g01358	MRE	AACCTAA	1318	7	-	Petroselinum crispum	light responsive element
CP_A01g01358	LAMP-element	CTTTATCA	41	8	-	Pisum sativum	light responsive element
CP_A01g02162	MBS	CAACTG	1021	6	-	Arabidopsis thaliana	drought-inducibility
CP_A01g02162	MBS	CAACTG	1551	6	+	Arabidopsis thaliana	drought-inducibility
CP_A01g02162	ABRE	TACGGTC	1431	7	-	Arabidopsis thaliana	abscisic acid responsiveness
CP_A01g02162	O2-site	GATGACATGG	999	9	+	Zea mays	zein metabolism regulation
CP_A01g02162	O2-site	GATGATGTGG	1043	9	-	Zea mays	zein metabolism regulation
CP_A01g02162	TATC-box	TATCCCA	1700	7	-	Oryza sativa	gibberellin-responsive element
CP_A01g02162	circadian	CAAAGATATC	453	9	-	Lycopersicon esculentum	circadian control
CP_A01g02162	circadian	CAAAGATATC	1933	9	-	Lycopersicon esculentum	circadian control
CP_A01g02162	GA-motif	ATAGATAA	746	8	-	Arabidopsis thaliana	light responsive element
CP_A01g02162	CGTCA-motif	CGTCA	129	5	+	Hordeum vulgare	MeJA-responsiveness
CP_A01g02162	TGACG-motif	TGACG	129	5	-	Hordeum vulgare	MeJA-responsiveness
CP_A01g02162	ARE	AAACCA	529	6	-	Zea mays	anaerobic induction
CP_A01g02162	ARE	AAACCA	628	6	-	Zea mays	anaerobic induction
CP_A01g02162	ARE	AAACCA	661	6	-	Zea mays	anaerobic induction
CP_A01g02162	ARE	AAACCA	1137	6	+	Zea mays	anaerobic induction
CP_A01g02162	ARE	AAACCA	1417	6	+	Zea mays	anaerobic induction
CP_A01g02162	ARE	AAACCA	1438	6	-	Zea mays	anaerobic induction
CP_A01g02162	ARE	AAACCA	1763	6	-	Zea mays	anaerobic induction
CP_A01g02162	Sp1	GGGCGG	214	6	-	Oryza sativa	light responsive element
CP_A01g02162	Sp1	GGGCGG	362	6	+	Oryza sativa	light responsive element
CP_A01g02553	ABRE	CACGTG	52	6	+	Arabidopsis thaliana	abscisic acid responsiveness
CP_A01g02553	ABRE	ACGTG	53	5	+	Arabidopsis thaliana	abscisic acid responsiveness
CP_A01g02553	ABRE	ACGTG	177	5	+	Arabidopsis thaliana	abscisic acid responsiveness
CP_A01g02553	ABRE	ACGTG	268	5	+	Arabidopsis thaliana	abscisic acid responsiveness
CP_A01g02553	ABRE	AACCCGG	286	7	-	Arabidopsis thaliana	abscisic acid responsiveness
CP_A01g02553	ABRE	ACGTG	415	5	+	Arabidopsis thaliana	abscisic acid responsiveness
CP_A01g02553	ABRE	CGCACGTGTC	1051	9	-	Hordeum vulgare	abscisic acid responsiveness
CP_A01g02553	ABRE	CACGTG	1053	6	-	Arabidopsis thaliana	abscisic acid responsiveness
CP_A01g02553	ABRE	ACGTG	1054	5	+	Arabidopsis thaliana	abscisic acid responsiveness
CP_A01g02553	RY-element	CATGCATG	644	8	+	Helianthus annuus	seed-specific regulation
CP_A01g02553	RY-element	CATGCATG	828	8	+	Helianthus annuus	seed-specific regulation
CP_A01g02553	TCCC-motif	TCTCCCT	1596	7	-	Spinacia oleracea	light responsive element
CP_A01g02553	TCCC-motif	TCTCCCT	1632	7	+	Spinacia oleracea	light responsive element
CP_A01g02553	GATA-motif	AAGGATAAGG	914	9	+	Solanum tuberosum	light responsive element
CP_A01g02553	AAAC-motif	CAATCAAAACCT	1660	11	-	Spinacia oleracea	light responsive element
CP_A01g02553	G-box	CACGTG	52	6	+	Arabidopsis thaliana	light responsive element
CP_A01g02553	G-box	CACGTC	176	6	-	Zea mays	light responsive element
CP_A01g02553	G-box	CCACGTAA	266	8	-	Brassica napus	light responsive element
CP_A01g02553	G-box	TACGTG	267	6	+	Arabidopsis thaliana	light responsive element
CP_A01g02553	G-box	TAACACGTAG	598	9	+	Brassica oleracea	light responsive element
CP_A01g02553	G-box	CACGAC	676	6	+	Zea mays	light responsive element
CP_A01g02553	G-box	ACACGTGT	1052	8	-	Brassica napus	light responsive element
CP_A01g02553	G-box	CACGTG	1053	6	-	Arabidopsis thaliana	light responsive element
CP_A01g02553	G-Box	CACGTG	52	6	+	Pisum sativum	light responsive element
CP_A01g02553	G-Box	CACGTT	414	6	-	Pisum sativum	light responsive element
CP_A01g02553	G-Box	CACGTG	1053	6	-	Pisum sativum	light responsive element
CP_A01g02553	GCN4_motif	TGAGTCA	629	7	-	Oryza sativa	endosperm expression
CP_A01g02553	CGTCA-motif	CGTCA	190	5	+	Hordeum vulgare	MeJA-responsiveness
CP_A01g02553	GC-motif	CCCCCG	1460	6	+	Zea mays	anaerobic induction
CP_A01g02553	TCA-element	CCATCTTTTT	1149	9	+	Nicotiana tabacum	salicylic acid responsiveness
CP_A01g02553	TCA-element	CCATCTTTTT	1908	9	-	Nicotiana tabacum	salicylic acid responsiveness
CP_A01g02553	TGA-element	AACGAC	327	6	+	Brassica oleracea	auxin-responsive element
CP_A01g02553	TGA-element	AACGAC	936	6	-	Brassica oleracea	auxin-responsive element
CP_A01g02553	TGACG-motif	TGACG	190	5	-	Hordeum vulgare	MeJA-responsiveness
CP_A01g02553	GT1-motif	GGTTAAT	868	7	+	Avena sativa	light responsive element
CP_A01g02553	GT1-motif	GGTTAAT	1900	7	+	Avena sativa	light responsive element
CP_A01g02553	ACE	GACACGTATG	1051	9	+	Petroselinum crispum	light responsive element
CP_A01g02553	ATC-motif	TGCTATCCA	476	9	+	Pisum sativum	light responsive element
CP_A01g02553	ARE	AAACCA	1746	6	+	Zea mays	anaerobic induction
CP_A02g00035	P-box	CCTTTTG	1007	7	+	Oryza sativa	gibberellin-responsive element
CP_A02g00035	ABRE	TACGGTC	178	7	+	Arabidopsis thaliana	abscisic acid responsiveness
CP_A02g00035	ABRE	ACGTG	249	5	-	Arabidopsis thaliana	abscisic acid responsiveness
CP_A02g00035	ABRE	ACGTG	291	5	-	Arabidopsis thaliana	abscisic acid responsiveness
CP_A02g00035	ABRE	ACGTG	321	5	-	Arabidopsis thaliana	abscisic acid responsiveness
CP_A02g00035	ABRE	ACGTG	424	5	-	Arabidopsis thaliana	abscisic acid responsiveness
CP_A02g00035	ABRE	CACGTG	724	6	+	Arabidopsis thaliana	abscisic acid responsiveness
CP_A02g00035	ABRE	ACGTG	725	5	+	Arabidopsis thaliana	abscisic acid responsiveness
CP_A02g00035	ABRE	ACGTG	912	5	+	Arabidopsis thaliana	abscisic acid responsiveness
CP_A02g00035	ABRE	ACGTG	951	5	-	Arabidopsis thaliana	abscisic acid responsiveness
CP_A02g00035	ABRE	ACGTG	1384	5	-	Arabidopsis thaliana	abscisic acid responsiveness
CP_A02g00035	ABRE	ACGTG	1599	5	-	Arabidopsis thaliana	abscisic acid responsiveness
CP_A02g00035	ABRE	AACCCGG	1712	7	+	Arabidopsis thaliana	abscisic acid responsiveness
CP_A02g00035	HD-Zip 1	CAAT(A/T)ATTG	464	8.5	+	Arabidopsis thaliana	palisade mesophyll cells
CP_A02g00035	GCN4_motif	TGAGTCA	901	7	-	Oryza sativa	endosperm expression
CP_A02g00035	G-Box	CACGTT	424	6	+	Pisum sativum	light responsive element
CP_A02g00035	G-Box	CACGTG	724	6	+	Pisum sativum	light responsive element
CP_A02g00035	G-Box	CACGTT	1384	6	+	Pisum sativum	light responsive element
CP_A02g00035	ARE	AAACCA	1887	6	-	Zea mays	anaerobic induction
CP_A02g00035	TGACG-motif	TGACG	1525	5	-	Hordeum vulgare	MeJA-responsiveness
CP_A02g00035	TCCC-motif	TCTCCCT	738	7	-	Spinacia oleracea	light responsive element
CP_A02g00035	TCCC-motif	TCTCCCT	1050	7	-	Spinacia oleracea	light responsive element
CP_A02g00035	TCCC-motif	TCTCCCT	1547	7	-	Spinacia oleracea	light responsive element
CP_A02g00035	AuxRR-core	GGTCCAT	218	7	+	Nicotiana tabacum	auxin-responsive element
CP_A02g00035	AuxRR-core	GGTCCAT	269	7	-	Nicotiana tabacum	auxin-responsive element
CP_A02g00035	CGTCA-motif	CGTCA	1525	5	+	Hordeum vulgare	MeJA-responsiveness
CP_A02g00035	CAT-box	GCCACT	934	6	+	Arabidopsis thaliana	meristem expression
CP_A02g00035	G-box	CACGTC	249	6	+	Zea mays	light responsive element
CP_A02g00035	G-box	CACGTC	291	6	+	Zea mays	light responsive element
CP_A02g00035	G-box	TACGTG	321	6	-	Arabidopsis thaliana	light responsive element
CP_A02g00035	G-box	GCCACGTGGA	722	9	+	Arabidopsis thaliana	light responsive element
CP_A02g00035	G-box	CACGTG	724	6	+	Arabidopsis thaliana	light responsive element
CP_A02g00035	G-box	CACGTC	911	6	-	Zea mays	light responsive element
CP_A02g00035	G-box	TACGTG	951	6	-	Arabidopsis thaliana	light responsive element
CP_A02g00035	G-box	TACGTG	1599	6	-	Arabidopsis thaliana	light responsive element
CP_A02g00035	O2-site	GTTGACGTGA	248	9	-	Zea mays	zein metabolism regulation
CP_A02g00035	Box 4	ATTAAT	71	6	+	Petroselinum crispum	light responsive element
CP_A02g00035	Box 4	ATTAAT	79	6	+	Petroselinum crispum	light responsive element
CP_A02g00035	Box 4	ATTAAT	593	6	+	Petroselinum crispum	light responsive element
CP_A02g00035	MSA-like	TCCAACGGT	256	9	-	Catharanthus roseus	cell cycle regulation
CP_A02g00035	AE-box	AGAAACAA	1223	8	+	Arabidopsis thaliana	light responsive element
CP_A02g00035	AE-box	AGAAACAA	1828	8	+	Arabidopsis thaliana	light responsive element
CP_A02g00035	Sp1	GGGCGG	399	6	-	Oryza sativa	light responsive element
CP_A02g00035	GT1-motif	GGTTAA	11	6	-	Arabidopsis thaliana	light responsive element
CP_A02g00417	Box 4	ATTAAT	256	6	+	Petroselinum crispum	light responsive element
CP_A02g00417	Box 4	ATTAAT	288	6	+	Petroselinum crispum	light responsive element
CP_A02g00417	Box 4	ATTAAT	307	6	+	Petroselinum crispum	light responsive element
CP_A02g00417	Box 4	ATTAAT	401	6	+	Petroselinum crispum	light responsive element
CP_A02g00417	Box 4	ATTAAT	712	6	+	Petroselinum crispum	light responsive element
CP_A02g00417	Box 4	ATTAAT	967	6	+	Petroselinum crispum	light responsive element
CP_A02g00417	G-box	CACGAC	1846	6	-	Zea mays	light responsive element
CP_A02g00417	G-box	CACGTC	1901	6	+	Zea mays	light responsive element
CP_A02g00417	TCA-element	CCATCTTTTT	240	9	+	Nicotiana tabacum	salicylic acid responsiveness
CP_A02g00417	CGTCA-motif	CGTCA	1903	5	+	Hordeum vulgare	MeJA-responsiveness
CP_A02g00417	I-box	cCATATCCAAT	1607	10	+	Flaveria trinervia	light responsive element
CP_A02g00417	AuxRR-core	GGTCCAT	1135	7	+	Nicotiana tabacum	auxin-responsive element
CP_A02g00417	GT1-motif	GGTTAA	460	6	-	Arabidopsis thaliana	light responsive element
CP_A02g00417	GT1-motif	GGTTAA	1322	6	+	Arabidopsis thaliana	light responsive element
CP_A02g00417	TGACG-motif	TGACG	1903	5	-	Hordeum vulgare	MeJA-responsiveness
CP_A02g00417	ARE	AAACCA	380	6	-	Zea mays	anaerobic induction
CP_A02g00417	ARE	AAACCA	893	6	+	Zea mays	anaerobic induction
CP_A02g00417	ARE	AAACCA	1943	6	+	Zea mays	anaerobic induction
CP_A02g00417	AE-box	AGAAACTT	474	8	+	Arabidopsis thaliana	light responsive element
CP_A02g00417	AE-box	AGAAACAA	1015	8	+	Arabidopsis thaliana	light responsive element
CP_A02g00417	LTR	CCGAAA	469	6	+	Hordeum vulgare	low-temperature responsiveness
CP_A02g00417	MBS	CAACTG	63	6	+	Arabidopsis thaliana	drought-inducibility
CP_A02g00417	ABRE	ACGTG	1901	5	-	Arabidopsis thaliana	abscisic acid responsiveness
CP_A02g00417	TCT-motif	TCTTAC	1047	6	-	Arabidopsis thaliana	light responsive element
CP_A02g00417	MRE	AACCTAA	935	7	-	Petroselinum crispum	light responsive element
CP_A02g00417	TC-rich repeats	GTTTTCTTAC	1047	9	-	Nicotiana tabacum	defense and stress responsiveness
CP_A02g01535	TGACG-motif	TGACG	1520	5	+	Hordeum vulgare	MeJA-responsiveness
CP_A02g01535	ACE	GACACGTATG	1359	9	-	Petroselinum crispum	light responsive element
CP_A02g01535	LTR	CCGAAA	1921	6	-	Hordeum vulgare	low-temperature responsiveness
CP_A02g01535	ARE	AAACCA	1173	6	+	Zea mays	anaerobic induction
CP_A02g01535	ARE	AAACCA	1300	6	-	Zea mays	anaerobic induction
CP_A02g01535	ARE	AAACCA	1435	6	+	Zea mays	anaerobic induction
CP_A02g01535	ARE	AAACCA	1503	6	+	Zea mays	anaerobic induction
CP_A02g01535	ARE	AAACCA	1818	6	+	Zea mays	anaerobic induction
CP_A02g01535	Sp1	GGGCGG	1940	6	-	Oryza sativa	light responsive element
CP_A02g01535	G-box	CACGAC	35	6	+	Zea mays	light responsive element
CP_A02g01535	G-box	TACGTG	219	6	-	Arabidopsis thaliana	light responsive element
CP_A02g01535	G-box	TACGTG	925	6	+	Arabidopsis thaliana	light responsive element
CP_A02g01535	G-box	TACGTG	1236	6	+	Arabidopsis thaliana	light responsive element
CP_A02g01535	G-box	TACGTG	1361	6	+	Arabidopsis thaliana	light responsive element
CP_A02g01535	G-box	TACGTG	1562	6	+	Arabidopsis thaliana	light responsive element
CP_A02g01535	Box 4	ATTAAT	1136	6	-	Petroselinum crispum	light responsive element
CP_A02g01535	Box 4	ATTAAT	1420	6	-	Petroselinum crispum	light responsive element
CP_A02g01535	GARE-motif	TCTGTTG	1957	7	+	Brassica oleracea	gibberellin-responsive element
CP_A02g01535	O2-site	GTTGACGTGA	1559	9	+	Zea mays	zein metabolism regulation
CP_A02g01535	I-box	gGATAAGGTG	778	9	+	Zea mays	light responsive element
CP_A02g01535	CGTCA-motif	CGTCA	1520	5	-	Hordeum vulgare	MeJA-responsiveness
CP_A02g01535	AuxRR-core	GGTCCAT	682	7	-	Nicotiana tabacum	auxin-responsive element
CP_A02g01535	RY-element	CATGCATG	1394	8	-	Helianthus annuus	seed-specific regulation
CP_A02g01535	ABRE	ACGTG	219	5	-	Arabidopsis thaliana	abscisic acid responsiveness
CP_A02g01535	ABRE	ACGTG	926	5	+	Arabidopsis thaliana	abscisic acid responsiveness
CP_A02g01535	ABRE	ACGTG	1237	5	+	Arabidopsis thaliana	abscisic acid responsiveness
CP_A02g01535	ABRE	ACGTG	1362	5	+	Arabidopsis thaliana	abscisic acid responsiveness
CP_A02g01535	ABRE	ACGTG	1563	5	+	Arabidopsis thaliana	abscisic acid responsiveness
CP_A02g01535	P-box	CCTTTTG	853	7	-	Oryza sativa	gibberellin-responsive element
CP_A02g01535	GATA-motif	AAGATAAGATT	1629	10	-	Arabidopsis thaliana	light responsive element
CP_A02g01535	TCT-motif	TCTTAC	1812	6	+	Arabidopsis thaliana	light responsive element
CP_A03g01905	I-box	gGATAAGGTG	1516	9	+	Zea mays	light responsive element
CP_A03g01905	CGTCA-motif	CGTCA	129	5	+	Hordeum vulgare	MeJA-responsiveness
CP_A03g01905	CGTCA-motif	CGTCA	235	5	-	Hordeum vulgare	MeJA-responsiveness
CP_A03g01905	CGTCA-motif	CGTCA	583	5	+	Hordeum vulgare	MeJA-responsiveness
CP_A03g01905	CGTCA-motif	CGTCA	1384	5	-	Hordeum vulgare	MeJA-responsiveness
CP_A03g01905	CGTCA-motif	CGTCA	1834	5	-	Hordeum vulgare	MeJA-responsiveness
CP_A03g01905	TCA-element	TCAGAAGAGG	1488	9	+	Brassica oleracea	salicylic acid responsiveness
CP_A03g01905	TCA-element	CCATCTTTTT	1890	9	-	Nicotiana tabacum	salicylic acid responsiveness
CP_A03g01905	Box II	ACACGTAGA	157	9	-	Arabidopsis thaliana	light responsive element
CP_A03g01905	G-box	TAACACGTAG	158	10	-	Brassica oleracea	light responsive element
CP_A03g01905	G-box	TACGTG	159	6	+	Arabidopsis thaliana	light responsive element
CP_A03g01905	G-box	TACGTG	180	6	-	Arabidopsis thaliana	light responsive element
CP_A03g01905	G-box	CACGTG	193	6	+	Arabidopsis thaliana	light responsive element
CP_A03g01905	G-box	TACGTG	1380	6	+	Arabidopsis thaliana	light responsive element
CP_A03g01905	Box 4	ATTAAT	615	6	+	Petroselinum crispum	light responsive element
CP_A03g01905	O2-site	GATGATGTGG	1432	9	+	Zea mays	zein metabolism regulation
CP_A03g01905	G-Box	CACGTG	193	6	+	Pisum sativum	light responsive element
CP_A03g01905	AE-box	AGAAACTT	1041	8	+	Arabidopsis thaliana	light responsive element
CP_A03g01905	LTR	CCGAAA	1568	6	+	Hordeum vulgare	low-temperature responsiveness
CP_A03g01905	ARE	AAACCA	145	6	-	Zea mays	anaerobic induction
CP_A03g01905	ARE	AAACCA	748	6	+	Zea mays	anaerobic induction
CP_A03g01905	ARE	AAACCA	945	6	+	Zea mays	anaerobic induction
CP_A03g01905	ARE	AAACCA	1228	6	+	Zea mays	anaerobic induction
CP_A03g01905	ARE	AAACCA	1983	6	+	Zea mays	anaerobic induction
CP_A03g01905	TGACG-motif	TGACG	129	5	-	Hordeum vulgare	MeJA-responsiveness
CP_A03g01905	TGACG-motif	TGACG	235	5	+	Hordeum vulgare	MeJA-responsiveness
CP_A03g01905	TGACG-motif	TGACG	583	5	-	Hordeum vulgare	MeJA-responsiveness
CP_A03g01905	TGACG-motif	TGACG	1384	5	+	Hordeum vulgare	MeJA-responsiveness
CP_A03g01905	TGACG-motif	TGACG	1834	5	+	Hordeum vulgare	MeJA-responsiveness
CP_A03g01905	ACE	GACACGTATG	178	9	+	Petroselinum crispum	light responsive element
CP_A03g01905	chs-CMA1a	TTACTTAA	1295	8	+	Daucus carota	light responsive element
CP_A03g01905	TCT-motif	TCTTAC	183	6	-	Arabidopsis thaliana	light responsive element
CP_A03g01905	TCT-motif	TCTTAC	251	6	+	Arabidopsis thaliana	light responsive element
CP_A03g01905	TCT-motif	TCTTAC	1293	6	+	Arabidopsis thaliana	light responsive element
CP_A03g01905	ABRE	ACGTG	160	5	+	Arabidopsis thaliana	abscisic acid responsiveness
CP_A03g01905	ABRE	TACGTGTC	178	8	-	Oryza sativa	abscisic acid responsiveness
CP_A03g01905	ABRE	ACGTG	180	5	-	Arabidopsis thaliana	abscisic acid responsiveness
CP_A03g01905	ABRE	CACGTG	193	6	+	Arabidopsis thaliana	abscisic acid responsiveness
CP_A03g01905	ABRE	ACGTG	194	5	+	Arabidopsis thaliana	abscisic acid responsiveness
CP_A03g01905	ABRE	ACGTG	1381	5	+	Arabidopsis thaliana	abscisic acid responsiveness
CP_A03g01905	MBS	CAACTG	1007	6	+	Arabidopsis thaliana	drought-inducibility
CP_A03g02025	ABRE	ACGTG	33	5	-	Arabidopsis thaliana	abscisic acid responsiveness
CP_A03g02025	ABRE	ACGTG	42	5	-	Arabidopsis thaliana	abscisic acid responsiveness
CP_A03g02025	ABRE	ACGTG	742	5	+	Arabidopsis thaliana	abscisic acid responsiveness
CP_A03g02025	ABRE	ACGTG	1528	5	-	Arabidopsis thaliana	abscisic acid responsiveness
CP_A03g02025	TCCC-motif	TCTCCCT	190	7	+	Spinacia oleracea	light responsive element
CP_A03g02025	TCT-motif	TCTTAC	1663	6	-	Arabidopsis thaliana	light responsive element
CP_A03g02025	GATA-motif	GATAGGA	1177	7	-	Arabidopsis thaliana	light responsive element
CP_A03g02025	TGA-element	AACGAC	447	6	-	Brassica oleracea	auxin-responsive element
CP_A03g02025	TGA-element	AACGAC	454	6	-	Brassica oleracea	auxin-responsive element
CP_A03g02025	GT1-motif	GGTTAAT	886	7	-	Avena sativa	light responsive element
CP_A03g02025	GT1-motif	GGTTAA	887	6	-	Arabidopsis thaliana	light responsive element
CP_A03g02025	AE-box	AGAAACAA	421	8	-	Arabidopsis thaliana	light responsive element
CP_A03g02025	AE-box	AGAAACAA	1766	8	-	Arabidopsis thaliana	light responsive element
CP_A03g02025	ARE	AAACCA	712	6	+	Zea mays	anaerobic induction
CP_A03g02025	ARE	AAACCA	1733	6	-	Zea mays	anaerobic induction
CP_A03g02025	G-box	CCACGTAA	32	8	+	Brassica napus	light responsive element
CP_A03g02025	G-box	TACGTG	33	6	-	Arabidopsis thaliana	light responsive element
CP_A03g02025	G-box	TACGTG	42	6	-	Arabidopsis thaliana	light responsive element
CP_A03g02025	G-box	CACGTC	741	6	-	Zea mays	light responsive element
CP_A03g02025	G-Box	CACGTT	1528	6	+	Pisum sativum	light responsive element
CP_A03g02025	O2-site	GTTGACGTGA	799	9	+	Zea mays	zein metabolism regulation
CP_A03g02025	Box 4	ATTAAT	153	6	+	Petroselinum crispum	light responsive element
CP_A03g02025	Box 4	ATTAAT	327	6	+	Petroselinum crispum	light responsive element
CP_A03g02025	AuxRR-core	GGTCCAT	331	7	-	Nicotiana tabacum	auxin-responsive element
CP_A03g02025	circadian	CAAAGATATC	178	9	+	Lycopersicon esculentum	circadian control
CP_A03g02025	circadian	CAAAGATATC	358	9	+	Lycopersicon esculentum	circadian control
CP_A03g02025	circadian	CAAAGATATC	1028	9	+	Lycopersicon esculentum	circadian control
CP_A03g02029	AAAC-motif	CAATCAAAACCT	1300	11	-	Spinacia oleracea	light responsive element
CP_A03g02029	MBSI	aaaAaaC(G/C)GTTA	888	10.5	+	Petunia hybrida	flavonoid biosynthetic genes regulation
CP_A03g02029	TGA-element	AACGAC	1495	6	+	Brassica oleracea	auxin-responsive element
CP_A03g02029	TGACG-motif	TGACG	1001	5	+	Hordeum vulgare	MeJA-responsiveness
CP_A03g02029	TGACG-motif	TGACG	1585	5	-	Hordeum vulgare	MeJA-responsiveness
CP_A03g02029	AE-box	AGAAACAA	1750	8	+	Arabidopsis thaliana	light responsive element
CP_A03g02029	ARE	AAACCA	706	6	-	Zea mays	anaerobic induction
CP_A03g02029	ARE	AAACCA	720	6	-	Zea mays	anaerobic induction
CP_A03g02029	ARE	AAACCA	976	6	-	Zea mays	anaerobic induction
CP_A03g02029	ARE	AAACCA	1300	6	-	Zea mays	anaerobic induction
CP_A03g02029	ARE	AAACCA	1817	6	+	Zea mays	anaerobic induction
CP_A03g02029	Gap-box	CAAATGAA(A/G)A	375	9	-	Arabidopsis thaliana	light responsive element
CP_A03g02029	TATC-box	TATCCCA	572	7	+	Oryza sativa	gibberellin-responsive element
CP_A03g02029	Box 4	ATTAAT	874	6	+	Petroselinum crispum	light responsive element
CP_A03g02029	Box 4	ATTAAT	1335	6	-	Petroselinum crispum	light responsive element
CP_A03g02029	GARE-motif	TCTGTTG	337	7	+	Brassica oleracea	gibberellin-responsive element
CP_A03g02029	GARE-motif	TCTGTTG	1524	7	-	Brassica oleracea	gibberellin-responsive element
CP_A03g02029	CGTCA-motif	CGTCA	1001	5	-	Hordeum vulgare	MeJA-responsiveness
CP_A03g02029	CGTCA-motif	CGTCA	1585	5	+	Hordeum vulgare	MeJA-responsiveness
CP_A03g02029	circadian	CAAAGATATC	24	10	+	Lycopersicon esculentum	circadian control
CP_A03g02030	ABRE	ACGTG	1670	5	+	Arabidopsis thaliana	abscisic acid responsiveness
CP_A03g02030	MBS	CAACTG	1253	6	+	Arabidopsis thaliana	drought-inducibility
CP_A03g02030	MBS	CAACTG	1973	6	-	Arabidopsis thaliana	drought-inducibility
CP_A03g02030	HD-Zip 1	CAAT(A/T)ATTG	209	8.5	+	Arabidopsis thaliana	palisade mesophyll cells
CP_A03g02030	TCCC-motif	TCTCCCT	1641	7	-	Spinacia oleracea	light responsive element
CP_A03g02030	GATA-motif	GATAGGG	1980	7	-	Pisum sativum	light responsive element
CP_A03g02030	MBSI	aaaAaaC(G/C)GTTA	633	11	-	Petunia hybrida	flavonoid biosynthetic genes regulation
CP_A03g02030	Box 4	ATTAAT	53	6	+	Petroselinum crispum	light responsive element
CP_A03g02030	Box 4	ATTAAT	421	6	+	Petroselinum crispum	light responsive element
CP_A03g02030	Box 4	ATTAAT	787	6	+	Petroselinum crispum	light responsive element
CP_A03g02030	Box 4	ATTAAT	1236	6	-	Petroselinum crispum	light responsive element
CP_A03g02030	Box 4	ATTAAT	1501	6	-	Petroselinum crispum	light responsive element
CP_A03g02030	Box 4	ATTAAT	1918	6	-	Petroselinum crispum	light responsive element
CP_A03g02030	G-Box	CACGTT	1669	6	-	Pisum sativum	light responsive element
CP_A03g02030	I-box	cCATATCCAAT	63	10	-	Flaveria trinervia	light responsive element
CP_A03g02030	I-box	AAGATAAGGCT	1822	10	-	Gossypium hirsutum	light responsive element
CP_A03g02030	CGTCA-motif	CGTCA	453	5	-	Hordeum vulgare	MeJA-responsiveness
CP_A03g02030	CGTCA-motif	CGTCA	973	5	+	Hordeum vulgare	MeJA-responsiveness
CP_A03g02030	CGTCA-motif	CGTCA	1830	5	+	Hordeum vulgare	MeJA-responsiveness
CP_A03g02030	circadian	CAAAGATATC	99	9	-	Lycopersicon esculentum	circadian control
CP_A03g02030	TGA-element	AACGAC	547	6	-	Brassica oleracea	auxin-responsive element
CP_A03g02030	TGACG-motif	TGACG	453	5	+	Hordeum vulgare	MeJA-responsiveness
CP_A03g02030	TGACG-motif	TGACG	973	5	-	Hordeum vulgare	MeJA-responsiveness
CP_A03g02030	TGACG-motif	TGACG	1830	5	-	Hordeum vulgare	MeJA-responsiveness
CP_A03g02030	ARE	AAACCA	123	6	+	Zea mays	anaerobic induction
CP_A03g02030	ARE	AAACCA	839	6	+	Zea mays	anaerobic induction
CP_A03g02030	ARE	AAACCA	1622	6	-	Zea mays	anaerobic induction
CP_A03g02030	ATC-motif	AGTAATCT	1443	8	+	Spinacia oleracea	light responsive element
CP_A05g01179	MBS	CAACTG	1357	6	+	Arabidopsis thaliana	drought-inducibility
CP_A05g01179	TCCC-motif	TCTCCCT	641	7	+	Spinacia oleracea	light responsive element
CP_A05g01179	ABRE	CACGTG	49	6	+	Arabidopsis thaliana	abscisic acid responsiveness
CP_A05g01179	ABRE	ACGTG	50	5	+	Arabidopsis thaliana	abscisic acid responsiveness
CP_A05g01179	ABRE	ACGTG	410	5	+	Arabidopsis thaliana	abscisic acid responsiveness
CP_A05g01179	ABRE	ACGTG	486	5	+	Arabidopsis thaliana	abscisic acid responsiveness
CP_A05g01179	TCT-motif	TCTTAC	604	6	+	Arabidopsis thaliana	light responsive element
CP_A05g01179	MRE	AACCTAA	109	7	-	Petroselinum crispum	light responsive element
CP_A05g01179	TC-rich repeats	GTTTTCTTAC	1488	9	+	Nicotiana tabacum	defense and stress responsiveness
CP_A05g01179	Box 4	ATTAAT	374	6	+	Petroselinum crispum	light responsive element
CP_A05g01179	Box 4	ATTAAT	475	6	+	Petroselinum crispum	light responsive element
CP_A05g01179	Box 4	ATTAAT	764	6	+	Petroselinum crispum	light responsive element
CP_A05g01179	G-Box	CACGTG	49	6	+	Pisum sativum	light responsive element
CP_A05g01179	G-Box	CACGTT	409	6	-	Pisum sativum	light responsive element
CP_A05g01179	G-Box	TCCACATGGCA	1388	10	+	Triticum aestivum	light responsive element
CP_A05g01179	G-box	CACGTG	49	6	+	Arabidopsis thaliana	light responsive element
CP_A05g01179	G-box	TACGTG	485	6	+	Arabidopsis thaliana	light responsive element
CP_A05g01179	AT1-motif	AATTATTTTTTATT	1521	13	-	Solanum tuberosum	light responsive element
CP_A05g01179	circadian	CAAAGATATC	987	9	+	Lycopersicon esculentum	circadian control
CP_A05g01179	GA-motif	ATAGATAA	708	8	+	Arabidopsis thaliana	light responsive element
CP_A05g01179	ATCT-motif	AATCTAATCC	678	9	+	Pisum sativum	light responsive element
CP_A05g01179	CGTCA-motif	CGTCA	1826	5	-	Hordeum vulgare	MeJA-responsiveness
CP_A05g01179	CGTCA-motif	CGTCA	1829	5	+	Hordeum vulgare	MeJA-responsiveness
CP_A05g01179	ACE	CTAACGTATT	264	9	+	Petroselinum crispum	light responsive element
CP_A05g01179	TGACG-motif	TGACG	1826	5	+	Hordeum vulgare	MeJA-responsiveness
CP_A05g01179	TGACG-motif	TGACG	1829	5	-	Hordeum vulgare	MeJA-responsiveness
CP_A05g01179	chs-CMA2a	TCACTTGA	1312	8	+	Petroselinum crispum	light responsive element
CP_A05g01179	ARE	AAACCA	941	6	+	Zea mays	anaerobic induction
CP_A05g01179	ARE	AAACCA	1901	6	+	Zea mays	anaerobic induction
CP_A05g01179	ARE	AAACCA	1958	6	+	Zea mays	anaerobic induction
CP_A05g01681	TC-rich repeats	GTTTTCTTAC	930	9	+	Nicotiana tabacum	defense and stress responsiveness
CP_A05g01681	ABRE	CACGTG	742	6	+	Arabidopsis thaliana	abscisic acid responsiveness
CP_A05g01681	ABRE	ACGTG	743	5	+	Arabidopsis thaliana	abscisic acid responsiveness
CP_A05g01681	ABRE	ACGTG	926	5	+	Arabidopsis thaliana	abscisic acid responsiveness
CP_A05g01681	ABRE	ACGTG	1532	5	-	Arabidopsis thaliana	abscisic acid responsiveness
CP_A05g01681	ABRE	CACGTG	1603	6	-	Arabidopsis thaliana	abscisic acid responsiveness
CP_A05g01681	ABRE	ACGTG	1604	5	+	Arabidopsis thaliana	abscisic acid responsiveness
CP_A05g01681	MBS	CAACTG	190	6	+	Arabidopsis thaliana	drought-inducibility
CP_A05g01681	TCCC-motif	TCTCCCT	1234	7	+	Spinacia oleracea	light responsive element
CP_A05g01681	TCT-motif	TCTTAC	908	6	-	Arabidopsis thaliana	light responsive element
CP_A05g01681	TCT-motif	TCTTAC	1115	6	-	Arabidopsis thaliana	light responsive element
CP_A05g01681	TGACG-motif	TGACG	924	5	+	Hordeum vulgare	MeJA-responsiveness
CP_A05g01681	TGACG-motif	TGACG	1468	5	+	Hordeum vulgare	MeJA-responsiveness
CP_A05g01681	TGACG-motif	TGACG	1526	5	-	Hordeum vulgare	MeJA-responsiveness
CP_A05g01681	DRE	TACCGACAT	1627	9	-	Arabidopsis thaliana	dehydration, low-temp, salt stresses_x000D_
CP_A05g01945	TGACG-motif	TGACG	358	5	-	Hordeum vulgare	MeJA-responsiveness
CP_A05g01945	TGACG-motif	TGACG	510	5	-	Hordeum vulgare	MeJA-responsiveness
CP_A05g01945	GT1-motif	GGTTAAT	226	7	-	Avena sativa	light responsive element
CP_A05g01945	GT1-motif	GGTTAA	227	6	-	Arabidopsis thaliana	light responsive element
CP_A05g01945	chs-CMA1a	TTACTTAA	1481	8	+	Daucus carota	light responsive element
CP_A05g01945	AE-box	AGAAACAA	1122	8	-	Arabidopsis thaliana	light responsive element
CP_A05g01945	ARE	AAACCA	323	6	+	Zea mays	anaerobic induction
CP_A05g01945	ARE	AAACCA	368	6	+	Zea mays	anaerobic induction
CP_A05g01945	ARE	AAACCA	387	6	+	Zea mays	anaerobic induction
CP_A05g01945	ARE	AAACCA	1574	6	-	Zea mays	anaerobic induction
CP_A05g01945	Box 4	ATTAAT	179	6	+	Petroselinum crispum	light responsive element
CP_A05g01945	Box 4	ATTAAT	264	6	+	Petroselinum crispum	light responsive element
CP_A05g01945	Box 4	ATTAAT	815	6	+	Petroselinum crispum	light responsive element
CP_A05g01945	Box 4	ATTAAT	1111	6	-	Petroselinum crispum	light responsive element
CP_A05g01945	Box 4	ATTAAT	1265	6	-	Petroselinum crispum	light responsive element
CP_A05g01945	Box 4	ATTAAT	1603	6	-	Petroselinum crispum	light responsive element
CP_A05g01945	Box 4	ATTAAT	1770	6	-	Petroselinum crispum	light responsive element
CP_A05g01945	CGTCA-motif	CGTCA	358	5	+	Hordeum vulgare	MeJA-responsiveness
CP_A05g01945	CGTCA-motif	CGTCA	510	5	+	Hordeum vulgare	MeJA-responsiveness
CP_A05g01945	GC-motif	CCCCCG	573	6	+	Zea mays	anaerobic induction
CP_A06g00542	CAG-motif	GAAAGGCAGAC	508	10	+	Arabidopsis thaliana	light responsive element
CP_A06g00542	GATA-motif	AAGGATAAGG	1333	9	-	Solanum tuberosum	light responsive element
CP_A06g00542	GATA-motif	AAGATAAGATT	1984	10	+	Arabidopsis thaliana	light responsive element
CP_A06g00542	GT1-motif	GGTTAA	1879	6	+	Arabidopsis thaliana	light responsive element
CP_A06g00542	TGA-element	AACGAC	565	6	-	Brassica oleracea	auxin-responsive element
CP_A06g00542	TGA-element	AACGAC	1773	6	+	Brassica oleracea	auxin-responsive element
CP_A06g00542	TGACG-motif	TGACG	1746	5	-	Hordeum vulgare	MeJA-responsiveness
CP_A06g00542	TGACG-motif	TGACG	1760	5	-	Hordeum vulgare	MeJA-responsiveness
CP_A06g00542	AE-box	AGAAACTT	799	8	-	Arabidopsis thaliana	light responsive element
CP_A06g00542	AE-box	AGAAACAA	1317	8	-	Arabidopsis thaliana	light responsive element
CP_A06g00542	LTR	CCGAAA	1970	6	+	Hordeum vulgare	low-temperature responsiveness
CP_A06g00542	GARE-motif	TCTGTTG	717	7	+	Brassica oleracea	gibberellin-responsive element
CP_A06g00542	GARE-motif	TCTGTTG	1919	7	-	Brassica oleracea	gibberellin-responsive element
CP_A06g00542	TCA-element	CCATCTTTTT	517	9	+	Nicotiana tabacum	salicylic acid responsiveness
CP_A06g00542	TCA-element	TCAGAAGAGG	1262	9	-	Brassica oleracea	salicylic acid responsiveness
CP_A06g00542	GC-motif	CCCCCG	911	6	+	Zea mays	anaerobic induction
CP_A06g00542	CGTCA-motif	CGTCA	1746	5	+	Hordeum vulgare	MeJA-responsiveness
CP_A06g00542	CGTCA-motif	CGTCA	1760	5	+	Hordeum vulgare	MeJA-responsiveness
CP_A06g00690	GARE-motif	TCTGTTG	1036	7	-	Brassica oleracea	gibberellin-responsive element
CP_A06g00690	O2-site	GATGA(C/T)(A/G)TG(A/G)	818	8	+	Zea mays	zein metabolism regulation
CP_A06g00690	O2-site	GATGA(C/T)(A/G)TG(A/G)	931	8	-	Zea mays	zein metabolism regulation
CP_A06g00690	Box 4	ATTAAT	479	6	+	Petroselinum crispum	light responsive element
CP_A06g00690	Box 4	ATTAAT	488	6	+	Petroselinum crispum	light responsive element
CP_A06g00690	Box 4	ATTAAT	1118	6	-	Petroselinum crispum	light responsive element
CP_A06g00690	Gap-box	CAAATGAA(A/G)A	1630	9	-	Arabidopsis thaliana	light responsive element
CP_A06g00690	circadian	CAAAGATATC	971	9	-	Lycopersicon esculentum	circadian control
CP_A06g00690	CGTCA-motif	CGTCA	1197	5	+	Hordeum vulgare	MeJA-responsiveness
CP_A06g00690	CGTCA-motif	CGTCA	1440	5	+	Hordeum vulgare	MeJA-responsiveness
CP_A06g00690	GT1-motif	GGTTAA	724	6	+	Arabidopsis thaliana	light responsive element
CP_A06g00690	chs-Unit 1 m1	ACCTAACCCGC	565	10	-	Hordeum vulgare	light responsive element
CP_A06g00690	TGACG-motif	TGACG	1197	5	-	Hordeum vulgare	MeJA-responsiveness
CP_A06g00690	TGACG-motif	TGACG	1440	5	-	Hordeum vulgare	MeJA-responsiveness
CP_A06g00690	Sp1	GGGCGG	386	6	+	Oryza sativa	light responsive element
CP_A06g00690	ARE	AAACCA	693	6	+	Zea mays	anaerobic induction
CP_A06g00690	ARE	AAACCA	1425	6	-	Zea mays	anaerobic induction
CP_A06g00690	ARE	AAACCA	1994	6	+	Zea mays	anaerobic induction
CP_A06g00690	LTR	CCGAAA	126	6	-	Hordeum vulgare	low-temperature responsiveness
CP_A06g00690	MBS	CAACTG	1005	6	-	Arabidopsis thaliana	drought-inducibility
CP_A06g00690	MBS	CAACTG	1055	6	+	Arabidopsis thaliana	drought-inducibility
CP_A06g00690	RY-element	CATGCATG	981	8	+	Helianthus annuus	seed-specific regulation
CP_A06g00690	TCT-motif	TCTTAC	882	6	-	Arabidopsis thaliana	light responsive element
CP_A06g00690	GATA-motif	AAGGATAAGG	1023	9	+	Solanum tuberosum	light responsive element
CP_A06g00690	TC-rich repeats	GTTTTCTTAC	904	9	+	Nicotiana tabacum	defense and stress responsiveness
CP_A06g00792	P-box	CAACAAACCCCTT	971	12	+	Petroselinum crispum	gibberellin-responsive element
CP_A06g00792	TCT-motif	TCTTAC	1693	6	-	Arabidopsis thaliana	light responsive element
CP_A06g00792	TCT-motif	TCTTAC	1910	6	-	Arabidopsis thaliana	light responsive element
CP_A06g00792	GTGGC-motif	GATTCTGTGGC	810	10	-	Spinacia oleracea	light responsive element
CP_A06g00792	MBS	CAACTG	238	6	+	Arabidopsis thaliana	drought-inducibility
CP_A06g00792	MBS	CAACTG	496	6	+	Arabidopsis thaliana	drought-inducibility
CP_A06g00792	MBS	CAACTG	1171	6	+	Arabidopsis thaliana	drought-inducibility
CP_A06g00792	MBS	CAACTG	1582	6	+	Arabidopsis thaliana	drought-inducibility
CP_A06g00792	TC-rich repeats	GTTTTCTTAC	1693	9	-	Nicotiana tabacum	defense and stress responsiveness
CP_A06g00792	ATCT-motif	AATCTAATCC	1713	9	-	Pisum sativum	light responsive element
CP_A06g00792	CGTCA-motif	CGTCA	820	5	+	Hordeum vulgare	MeJA-responsiveness
CP_A06g00792	CGTCA-motif	CGTCA	1571	5	+	Hordeum vulgare	MeJA-responsiveness
CP_A06g00792	Gap-box	CAAATGAA(A/G)A	753	9.5	+	Arabidopsis thaliana	light responsive element
CP_A06g00792	GCN4_motif	TGAGTCA	871	7	-	Oryza sativa	endosperm expression
CP_A06g00792	GARE-motif	TCTGTTG	609	7	-	Brassica oleracea	gibberellin-responsive element
CP_A06g00792	Box 4	ATTAAT	461	6	+	Petroselinum crispum	light responsive element
CP_A06g00792	ATC-motif	AGTAATCT	1009	8	-	Spinacia oleracea	light responsive element
CP_A06g00792	ARE	AAACCA	975	6	+	Zea mays	anaerobic induction
CP_A06g00792	TGA-box	TGACGTAA	1568	8	-	Glycine max	auxin-responsive element
CP_A06g00792	TGACG-motif	TGACG	820	5	-	Hordeum vulgare	MeJA-responsiveness
CP_A06g00792	TGACG-motif	TGACG	1571	5	-	Hordeum vulgare	MeJA-responsiveness
CP_A06g00792	GT1-motif	GGTTAA	1214	6	-	Arabidopsis thaliana	light responsive element
CP_A06g00792	GT1-motif	GGTTAAT	1221	7	-	Avena sativa	light responsive element
CP_A06g00792	GT1-motif	GGTTAA	1222	6	-	Arabidopsis thaliana	light responsive element
CP_A06g00796	ARE	AAACCA	82	6	-	Zea mays	anaerobic induction
CP_A06g00796	ARE	AAACCA	958	6	+	Zea mays	anaerobic induction
CP_A06g00796	ARE	AAACCA	1377	6	-	Zea mays	anaerobic induction
CP_A06g00796	LTR	CCGAAA	1823	6	+	Hordeum vulgare	low-temperature responsiveness
CP_A06g00796	TGACG-motif	TGACG	475	5	+	Hordeum vulgare	MeJA-responsiveness
CP_A06g00796	TGACG-motif	TGACG	496	5	+	Hordeum vulgare	MeJA-responsiveness
CP_A06g00796	TGACG-motif	TGACG	1079	5	-	Hordeum vulgare	MeJA-responsiveness
CP_A06g00796	TCA-element	TCAGAAGAGG	87	9	+	Brassica oleracea	salicylic acid responsiveness
CP_A06g00796	CGTCA-motif	CGTCA	475	5	-	Hordeum vulgare	MeJA-responsiveness
CP_A06g00796	CGTCA-motif	CGTCA	496	5	-	Hordeum vulgare	MeJA-responsiveness
CP_A06g00796	CGTCA-motif	CGTCA	1079	5	+	Hordeum vulgare	MeJA-responsiveness
CP_A06g00796	G-Box	CACGTT	1410	6	-	Pisum sativum	light responsive element
CP_A06g00796	TATC-box	TATCCCA	385	7	-	Oryza sativa	gibberellin-responsive element
CP_A06g00796	GATA-motif	AAGATAAGATT	1132	10	-	Arabidopsis thaliana	light responsive element
CP_A06g00796	MRE	AACCTAA	1045	7	-	Petroselinum crispum	light responsive element
CP_A06g00796	P-box	CCTTTTG	1810	7	+	Oryza sativa	gibberellin-responsive element
CP_A06g00796	ABRE	ACGTG	1411	5	+	Arabidopsis thaliana	abscisic acid responsiveness
CP_A06g02002	ACA-motif	AATTACAGCCATT	1466	12	+	Pisum sativum	light responsive element
CP_A06g02002	ABRE	ACGTG	167	5	-	Arabidopsis thaliana	abscisic acid responsiveness
CP_A06g02002	ABRE	TACGGTC	1934	7	+	Arabidopsis thaliana	abscisic acid responsiveness
CP_A06g02002	MBS	CAACTG	237	6	+	Arabidopsis thaliana	drought-inducibility
CP_A06g02002	TCCC-motif	TCTCCCT	1497	7	+	Spinacia oleracea	light responsive element
CP_A06g02002	P-box	CCTTTTG	455	7	+	Oryza sativa	gibberellin-responsive element
CP_A06g02002	TCT-motif	TCTTAC	37	6	-	Arabidopsis thaliana	light responsive element
CP_A06g02002	TGACG-motif	TGACG	423	5	+	Hordeum vulgare	MeJA-responsiveness
CP_A06g02002	TGA-element	AACGAC	6	6	+	Brassica oleracea	auxin-responsive element
CP_A06g02002	TGA-element	AACGAC	1941	6	-	Brassica oleracea	auxin-responsive element
CP_A06g02002	ARE	AAACCA	663	6	+	Zea mays	anaerobic induction
CP_A06g02002	ARE	AAACCA	985	6	+	Zea mays	anaerobic induction
CP_A06g02002	Sp1	GGGCGG	1091	6	-	Oryza sativa	light responsive element
CP_A06g02002	G-box	CACGTC	167	6	+	Zea mays	light responsive element
CP_A06g02002	Gap-box	CAAATGAA(A/G)A	1126	9.5	+	Arabidopsis thaliana	light responsive element
CP_A06g02002	Box 4	ATTAAT	1370	6	-	Petroselinum crispum	light responsive element
CP_A06g02002	CGTCA-motif	CGTCA	423	5	-	Hordeum vulgare	MeJA-responsiveness
CP_A06g02342	TCA-element	CCATCTTTTT	384	9	+	Nicotiana tabacum	salicylic acid responsiveness
CP_A06g02342	TCA-element	CCATCTTTTT	1497	9	+	Nicotiana tabacum	salicylic acid responsiveness
CP_A06g02342	Box 4	ATTAAT	705	6	+	Petroselinum crispum	light responsive element
CP_A06g02342	Box 4	ATTAAT	1691	6	-	Petroselinum crispum	light responsive element
CP_A06g02342	GARE-motif	TCTGTTG	442	7	+	Brassica oleracea	gibberellin-responsive element
CP_A06g02342	O2-site	GTTGACGTGA	609	9	+	Zea mays	zein metabolism regulation
CP_A06g02342	ARE	AAACCA	381	6	+	Zea mays	anaerobic induction
CP_A06g02342	ARE	AAACCA	820	6	+	Zea mays	anaerobic induction
CP_A06g02342	ARE	AAACCA	1935	6	-	Zea mays	anaerobic induction
CP_A06g02342	ACE	CTAACGTATT	184	9	-	Petroselinum crispum	light responsive element
CP_A06g02342	GT1-motif	GGTTAAT	587	7	-	Avena sativa	light responsive element
CP_A06g02342	GT1-motif	GGTTAA	588	6	-	Arabidopsis thaliana	light responsive element
CP_A06g02342	TGA-element	AACGAC	785	6	+	Brassica oleracea	auxin-responsive element
CP_A06g02342	TCT-motif	TCTTAC	757	6	-	Arabidopsis thaliana	light responsive element
CP_A06g02342	3-AF1 binding site	TAAGAGAGGAA	1939	10	-	Solanum tuberosum	light responsive element
CP_A06g02342	P-box	CCTTTTG	1888	7	+	Oryza sativa	gibberellin-responsive element
CP_A07g00374	circadian	CAAAGATATC	987	9	-	Lycopersicon esculentum	circadian control
CP_A07g00374	CGTCA-motif	CGTCA	1852	5	-	Hordeum vulgare	MeJA-responsiveness
CP_A07g00374	Box 4	ATTAAT	1395	6	-	Petroselinum crispum	light responsive element
CP_A07g00374	Box 4	ATTAAT	1572	6	-	Petroselinum crispum	light responsive element
CP_A07g00374	GARE-motif	TCTGTTG	1897	7	-	Brassica oleracea	gibberellin-responsive element
CP_A07g00374	O2-site	GATGATGTGG	77	9	+	Zea mays	zein metabolism regulation
CP_A07g00374	CAT-box	GCCACT	575	6	-	Arabidopsis thaliana	meristem expression
CP_A07g00374	ARE	AAACCA	489	6	-	Zea mays	anaerobic induction
CP_A07g00374	GT1-motif	GGTTAA	644	6	+	Arabidopsis thaliana	light responsive element
CP_A07g00374	GT1-motif	GGTTAA	1143	6	-	Arabidopsis thaliana	light responsive element
CP_A07g00374	GT1-motif	GGTTAA	1153	6	-	Arabidopsis thaliana	light responsive element
CP_A07g00374	GT1-motif	GGTTAA	1188	6	+	Arabidopsis thaliana	light responsive element
CP_A07g00374	GT1-motif	GGTTAAT	1230	7	-	Avena sativa	light responsive element
CP_A07g00374	GT1-motif	GGTTAA	1231	6	-	Arabidopsis thaliana	light responsive element
CP_A07g00374	TGACG-motif	TGACG	1852	5	+	Hordeum vulgare	MeJA-responsiveness
CP_A07g00374	TGA-element	AACGAC	1266	6	+	Brassica oleracea	auxin-responsive element
CP_A07g00374	TCT-motif	TCTTAC	1072	6	-	Arabidopsis thaliana	light responsive element
CP_A07g00374	GATA-motif	AAGGATAAGG	858	9	+	Solanum tuberosum	light responsive element
CP_A07g00385	GT1-motif	GGTTAA	644	6	+	Arabidopsis thaliana	light responsive element
CP_A07g00385	GT1-motif	GGTTAA	1143	6	-	Arabidopsis thaliana	light responsive element
CP_A07g00385	GT1-motif	GGTTAA	1153	6	-	Arabidopsis thaliana	light responsive element
CP_A07g00385	GT1-motif	GGTTAA	1188	6	+	Arabidopsis thaliana	light responsive element
CP_A07g00385	GT1-motif	GGTTAAT	1230	7	-	Avena sativa	light responsive element
CP_A07g00385	GT1-motif	GGTTAA	1231	6	-	Arabidopsis thaliana	light responsive element
CP_A07g00385	TGACG-motif	TGACG	1852	5	+	Hordeum vulgare	MeJA-responsiveness
CP_A07g00385	TGA-element	AACGAC	1266	6	+	Brassica oleracea	auxin-responsive element
CP_A07g00385	ARE	AAACCA	489	6	-	Zea mays	anaerobic induction
CP_A07g00385	Box 4	ATTAAT	1395	6	-	Petroselinum crispum	light responsive element
CP_A07g00385	Box 4	ATTAAT	1572	6	-	Petroselinum crispum	light responsive element
CP_A07g00385	O2-site	GATGATGTGG	77	9	+	Zea mays	zein metabolism regulation
CP_A07g00385	GARE-motif	TCTGTTG	1897	7	-	Brassica oleracea	gibberellin-responsive element
CP_A07g00385	CAT-box	GCCACT	575	6	-	Arabidopsis thaliana	meristem expression
CP_A07g00385	circadian	CAAAGATATC	987	9	-	Lycopersicon esculentum	circadian control
CP_A07g00385	CGTCA-motif	CGTCA	1852	5	-	Hordeum vulgare	MeJA-responsiveness
CP_A07g00385	TCT-motif	TCTTAC	1072	6	-	Arabidopsis thaliana	light responsive element
CP_A07g00385	GATA-motif	AAGGATAAGG	858	9	+	Solanum tuberosum	light responsive element
CP_A07g00847	MRE	AACCTAA	199	7	+	Petroselinum crispum	light responsive element
CP_A07g00847	MRE	AACCTAA	1525	7	-	Petroselinum crispum	light responsive element
CP_A07g00847	GATA-motif	GATAGGA	1	7	-	Arabidopsis thaliana	light responsive element
CP_A07g00847	TC-rich repeats	GTTTTCTTAC	443	9	-	Nicotiana tabacum	defense and stress responsiveness
CP_A07g00847	CGTCA-motif	CGTCA	1060	5	-	Hordeum vulgare	MeJA-responsiveness
CP_A07g00847	AuxRR-core	GGTCCAT	1928	7	+	Nicotiana tabacum	auxin-responsive element
CP_A07g00847	GA-motif	ATAGATAA	501	8	-	Arabidopsis thaliana	light responsive element
CP_A07g00847	GARE-motif	TCTGTTG	465	7	-	Brassica oleracea	gibberellin-responsive element
CP_A07g00847	LTR	CCGAAA	135	6	+	Hordeum vulgare	low-temperature responsiveness
CP_A07g00847	ARE	AAACCA	219	6	-	Zea mays	anaerobic induction
CP_A07g00847	ARE	AAACCA	738	6	-	Zea mays	anaerobic induction
CP_A07g00847	ARE	AAACCA	751	6	+	Zea mays	anaerobic induction
CP_A07g00847	TGACG-motif	TGACG	1060	5	+	Hordeum vulgare	MeJA-responsiveness
CP_A08g00491	AACA_motif	TAACAAACTCCA	586	11	-	Oryza sativa	endosperm expression
CP_A08g00491	TCT-motif	TCTTAC	917	6	-	Arabidopsis thaliana	light responsive element
CP_A08g00491	GATA-motif	GATAGGG	1401	7	+	Pisum sativum	light responsive element
CP_A08g00491	ABRE	ACGTG	937	5	+	Arabidopsis thaliana	abscisic acid responsiveness
CP_A08g00491	ABRE	GCAACGTGTC	1350	9	+	Hordeum vulgare	abscisic acid responsiveness
CP_A08g00491	ABRE	TACGTGTC	1352	8	+	Oryza sativa	abscisic acid responsiveness
CP_A08g00491	ABRE	ACGTG	1353	5	+	Arabidopsis thaliana	abscisic acid responsiveness
CP_A08g00491	MBS	CAACTG	853	6	-	Arabidopsis thaliana	drought-inducibility
CP_A08g00491	MBS	CAACTG	1089	6	+	Arabidopsis thaliana	drought-inducibility
CP_A08g00491	MBS	CAACTG	1563	6	-	Arabidopsis thaliana	drought-inducibility
CP_A08g00491	Sp1	GGGCGG	1634	6	-	Oryza sativa	light responsive element
CP_A08g00491	ARE	AAACCA	158	6	-	Zea mays	anaerobic induction
CP_A08g00491	ARE	AAACCA	665	6	+	Zea mays	anaerobic induction
CP_A08g00491	ARE	AAACCA	1814	6	-	Zea mays	anaerobic induction
CP_A08g00491	TGA-element	AACGAC	1429	6	+	Brassica oleracea	auxin-responsive element
CP_A08g00491	TGACG-motif	TGACG	973	5	+	Hordeum vulgare	MeJA-responsiveness
CP_A08g00491	GT1-motif	GGTTAA	558	6	+	Arabidopsis thaliana	light responsive element
CP_A08g00491	GT1-motif	GGTTAA	1457	6	-	Arabidopsis thaliana	light responsive element
CP_A08g00491	CGTCA-motif	CGTCA	973	5	-	Hordeum vulgare	MeJA-responsiveness
CP_A08g00491	TCA-element	CCATCTTTTT	1326	9	+	Nicotiana tabacum	salicylic acid responsiveness
CP_A08g00491	GA-motif	ATAGATAA	1048	8	-	Arabidopsis thaliana	light responsive element
CP_A08g00491	G-box	TAACACGTAG	1351	9	-	Brassica oleracea	light responsive element
CP_A08g00491	G-box	TACGTG	1352	6	+	Arabidopsis thaliana	light responsive element
CP_A08g00491	CAT-box	GCCACT	496	6	+	Arabidopsis thaliana	meristem expression
CP_A08g00491	G-Box	CACGTT	936	6	-	Pisum sativum	light responsive element
CP_A08g00491	O2-site	GATGATGTGG	789	9	+	Zea mays	zein metabolism regulation
CP_A08g00491	Box 4	ATTAAT	413	6	+	Petroselinum crispum	light responsive element
CP_A08g01689	LAMP-element	CTTTATCA	1580	8	-	Pisum sativum	light responsive element
CP_A08g01689	ABRE	ACGTG	992	5	-	Arabidopsis thaliana	abscisic acid responsiveness
CP_A08g01689	ABRE	ACGTG	1437	5	+	Arabidopsis thaliana	abscisic acid responsiveness
CP_A08g01689	P-box	CCTTTTG	682	7	+	Oryza sativa	gibberellin-responsive element
CP_A08g01689	MRE	AACCTAA	598	7	+	Petroselinum crispum	light responsive element
CP_A08g01689	chs-CMA2a	TCACTTGA	27	8	-	Petroselinum crispum	light responsive element
CP_A08g01689	LTR	CCGAAA	1768	6	+	Hordeum vulgare	low-temperature responsiveness
CP_A08g01689	Box 4	ATTAAT	42	6	+	Petroselinum crispum	light responsive element
CP_A08g01689	Box 4	ATTAAT	239	6	+	Petroselinum crispum	light responsive element
CP_A08g01689	Box 4	ATTAAT	1408	6	-	Petroselinum crispum	light responsive element
CP_A08g01689	MSA-like	TCAAACGGT	933	9	+	Catharanthus roseus	cell cycle regulation
CP_A08g01689	G-Box	CACGTT	1436	6	-	Pisum sativum	light responsive element
CP_A08g01689	G-box	TACGTG	992	6	-	Arabidopsis thaliana	light responsive element
CP_A08g01689	AuxRR-core	GGTCCAT	544	7	-	Nicotiana tabacum	auxin-responsive element
CP_A08g01693	G-box	TACGTG	462	6	+	Arabidopsis thaliana	light responsive element
CP_A08g01693	G-box	CACGTC	480	6	+	Zea mays	light responsive element
CP_A08g01693	G-box	TACGTG	693	6	+	Arabidopsis thaliana	light responsive element
CP_A08g01693	G-box	TACGTG	1989	6	-	Arabidopsis thaliana	light responsive element
CP_A08g01693	TATC-box	TATCCCA	1973	7	-	Oryza sativa	gibberellin-responsive element
CP_A08g01693	Box 4	ATTAAT	929	6	+	Petroselinum crispum	light responsive element
CP_A08g01693	Box 4	ATTAAT	943	6	+	Petroselinum crispum	light responsive element
CP_A08g01693	Box 4	ATTAAT	1065	6	-	Petroselinum crispum	light responsive element
CP_A08g01693	Box 4	ATTAAT	1069	6	-	Petroselinum crispum	light responsive element
CP_A08g01693	Box 4	ATTAAT	1073	6	-	Petroselinum crispum	light responsive element
CP_A08g01693	Box 4	ATTAAT	1077	6	-	Petroselinum crispum	light responsive element
CP_A08g01693	Box 4	ATTAAT	1295	6	-	Petroselinum crispum	light responsive element
CP_A08g01693	Box 4	ATTAAT	1365	6	-	Petroselinum crispum	light responsive element
CP_A08g01693	Box 4	ATTAAT	1918	6	-	Petroselinum crispum	light responsive element
CP_A08g01693	G-Box	CACGTT	616	6	-	Pisum sativum	light responsive element
CP_A08g01693	GARE-motif	TCTGTTG	1209	7	+	Brassica oleracea	gibberellin-responsive element
CP_A08g01693	CGTCA-motif	CGTCA	9	5	+	Hordeum vulgare	MeJA-responsiveness
CP_A08g01693	AuxRR-core	GGTCCAT	596	7	+	Nicotiana tabacum	auxin-responsive element
CP_A08g01693	TGACG-motif	TGACG	9	5	-	Hordeum vulgare	MeJA-responsiveness
CP_A08g01693	LTR	CCGAAA	201	6	+	Hordeum vulgare	low-temperature responsiveness
CP_A08g01693	LTR	CCGAAA	1855	6	+	Hordeum vulgare	low-temperature responsiveness
CP_A08g01693	ARE	AAACCA	1676	6	-	Zea mays	anaerobic induction
CP_A08g01693	ARE	AAACCA	1964	6	-	Zea mays	anaerobic induction
CP_A08g01693	Sp1	GGGCGG	969	6	-	Oryza sativa	light responsive element
CP_A08g01693	ABRE	ACGTG	463	5	+	Arabidopsis thaliana	abscisic acid responsiveness
CP_A08g01693	ABRE	ACGTG	480	5	-	Arabidopsis thaliana	abscisic acid responsiveness
CP_A08g01693	ABRE	ACGTG	617	5	+	Arabidopsis thaliana	abscisic acid responsiveness
CP_A08g01693	ABRE	ACGTG	694	5	+	Arabidopsis thaliana	abscisic acid responsiveness
CP_A08g01693	ABRE	ACGTG	1989	5	-	Arabidopsis thaliana	abscisic acid responsiveness
CP_A08g01693	MBS	CAACTG	679	6	+	Arabidopsis thaliana	drought-inducibility
CP_A08g01693	MBS	CAACTG	1634	6	+	Arabidopsis thaliana	drought-inducibility
CP_A08g01693	TCT-motif	TCTTAC	1529	6	+	Arabidopsis thaliana	light responsive element
CP_A08g01693	TC-rich repeats	GTTTTCTTAC	1525	9	+	Nicotiana tabacum	defense and stress responsiveness
CP_A09g00252	TGACG-motif	TGACG	1499	5	-	Hordeum vulgare	MeJA-responsiveness
CP_A09g00252	TGA-element	AACGAC	1181	6	+	Brassica oleracea	auxin-responsive element
CP_A09g00252	LTR	CCGAAA	454	6	+	Hordeum vulgare	low-temperature responsiveness
CP_A09g00252	LTR	CCGAAA	1101	6	-	Hordeum vulgare	low-temperature responsiveness
CP_A09g00252	ARE	AAACCA	270	6	+	Zea mays	anaerobic induction
CP_A09g00252	ARE	AAACCA	396	6	-	Zea mays	anaerobic induction
CP_A09g00252	ARE	AAACCA	1079	6	-	Zea mays	anaerobic induction
CP_A09g00252	G-box	CACGTG	1637	6	-	Arabidopsis thaliana	light responsive element
CP_A09g00252	G-Box	CACGTG	1637	6	-	Pisum sativum	light responsive element
CP_A09g00252	Box 4	ATTAAT	430	6	+	Petroselinum crispum	light responsive element
CP_A09g00252	CGTCA-motif	CGTCA	1499	5	+	Hordeum vulgare	MeJA-responsiveness
CP_A09g00252	GC-motif	CCCCCG	1626	6	+	Zea mays	anaerobic induction
CP_A09g00252	TCA-element	CCATCTTTTT	232	9	+	Nicotiana tabacum	salicylic acid responsiveness
CP_A09g00252	ABRE	CACGTG	1637	6	-	Arabidopsis thaliana	abscisic acid responsiveness
CP_A09g00252	ABRE	ACGTG	1638	5	+	Arabidopsis thaliana	abscisic acid responsiveness
CP_A09g00252	MBS	CAACTG	988	6	+	Arabidopsis thaliana	drought-inducibility
CP_A09g00252	3-AF1 binding site	TAAGAGAGGAA	559	10	+	Solanum tuberosum	light responsive element
CP_A09g00253	TCA-element	CCATCTTTTT	1554	9	+	Nicotiana tabacum	salicylic acid responsiveness
CP_A09g00253	GC-motif	CCCCCG	386	6	+	Zea mays	anaerobic induction
CP_A09g00253	CGTCA-motif	CGTCA	415	5	+	Hordeum vulgare	MeJA-responsiveness
CP_A09g00253	Box 4	ATTAAT	77	6	+	Petroselinum crispum	light responsive element
CP_A09g00253	Box 4	ATTAAT	730	6	+	Petroselinum crispum	light responsive element
CP_A09g00253	Box 4	ATTAAT	767	6	+	Petroselinum crispum	light responsive element
CP_A09g00253	Box 4	ATTAAT	1752	6	-	Petroselinum crispum	light responsive element
CP_A09g00253	G-Box	CACGTG	371	6	+	Pisum sativum	light responsive element
CP_A09g00253	G-Box	CACGTT	405	6	-	Pisum sativum	light responsive element
CP_A09g00253	G-Box	CACGTG	495	6	+	Pisum sativum	light responsive element
CP_A09g00253	G-Box	CACGTT	526	6	-	Pisum sativum	light responsive element
CP_A09g00253	G-Box	CACGTG	701	6	+	Pisum sativum	light responsive element
CP_A09g00253	G-box	ACACGTGT	370	8	+	Brassica napus	light responsive element
CP_A09g00253	G-box	CACGTG	371	6	+	Arabidopsis thaliana	light responsive element
CP_A09g00253	G-box	TCCACGTGGCATT	490	12	-	Arabidopsis thaliana	light responsive element
CP_A09g00253	G-box	GCCACGTGGA	493	9	+	Arabidopsis thaliana	light responsive element
CP_A09g00253	G-box	CACGTG	495	6	+	Arabidopsis thaliana	light responsive element
CP_A09g00253	G-box	CACGAC	541	6	-	Zea mays	light responsive element
CP_A09g00253	G-box	ACACGTGT	700	8	+	Brassica napus	light responsive element
CP_A09g00253	G-box	CACGTG	701	6	+	Arabidopsis thaliana	light responsive element
CP_A09g00253	Gap-box	CAAATGAA(A/G)A	929	9.5	-	Arabidopsis thaliana	light responsive element
CP_A09g00253	ARE	AAACCA	1055	6	-	Zea mays	anaerobic induction
CP_A09g00253	ARE	AAACCA	1296	6	+	Zea mays	anaerobic induction
CP_A09g00253	ARE	AAACCA	1592	6	+	Zea mays	anaerobic induction
CP_A09g00253	ARE	AAACCA	1718	6	-	Zea mays	anaerobic induction
CP_A09g00253	LTR	CCGAAA	1776	6	+	Hordeum vulgare	low-temperature responsiveness
CP_A09g00253	TGACG-motif	TGACG	415	5	-	Hordeum vulgare	MeJA-responsiveness
CP_A09g00253	GATA-motif	GATAGGA	556	7	+	Arabidopsis thaliana	light responsive element
CP_A09g00253	3-AF1 binding site	TAAGAGAGGAA	1881	10	+	Solanum tuberosum	light responsive element
CP_A09g00253	ABRE	CACGTG	371	6	+	Arabidopsis thaliana	abscisic acid responsiveness
CP_A09g00253	ABRE	ACGTG	372	5	+	Arabidopsis thaliana	abscisic acid responsiveness
CP_A09g00253	ABRE	GCAACGTGTC	403	9	+	Hordeum vulgare	abscisic acid responsiveness
CP_A09g00253	ABRE	ACGTG	406	5	+	Arabidopsis thaliana	abscisic acid responsiveness
CP_A09g00253	ABRE	CACGTG	495	6	+	Arabidopsis thaliana	abscisic acid responsiveness
CP_A09g00253	ABRE	ACGTG	496	5	+	Arabidopsis thaliana	abscisic acid responsiveness
CP_A09g00253	ABRE	ACGTG	527	5	+	Arabidopsis thaliana	abscisic acid responsiveness
CP_A09g00253	ABRE	CACGTG	701	6	+	Arabidopsis thaliana	abscisic acid responsiveness
CP_A09g00253	ABRE	ACGTG	702	5	+	Arabidopsis thaliana	abscisic acid responsiveness
CP_A09g00312	TC-rich repeats	ATTCTCTAAC	333	9	+	Nicotiana tabacum	defense and stress responsiveness
CP_A09g00312	HD-Zip 1	CAAT(A/T)ATTG	619	8.5	+	Arabidopsis thaliana	palisade mesophyll cells
CP_A09g00312	MBS	CAACTG	1034	6	+	Arabidopsis thaliana	drought-inducibility
CP_A09g00312	ABRE	CACGTG	766	6	+	Arabidopsis thaliana	abscisic acid responsiveness
CP_A09g00312	ABRE	ACGTG	767	5	+	Arabidopsis thaliana	abscisic acid responsiveness
CP_A09g00312	ABRE	ACGTG	1293	5	+	Arabidopsis thaliana	abscisic acid responsiveness
CP_A09g00312	GATA-motif	AAGATAAGATT	1596	10	-	Arabidopsis thaliana	light responsive element
CP_A09g00312	TCT-motif	TCTTAC	122	6	-	Arabidopsis thaliana	light responsive element
CP_A09g00312	AACA_motif	TAACAAACTCCA	395	11	-	Oryza sativa	endosperm expression
CP_A09g00312	ARE	AAACCA	369	6	+	Zea mays	anaerobic induction
CP_A09g00312	ARE	AAACCA	415	6	-	Zea mays	anaerobic induction
CP_A09g00312	ARE	AAACCA	446	6	+	Zea mays	anaerobic induction
CP_A09g00312	ARE	AAACCA	784	6	-	Zea mays	anaerobic induction
CP_A09g00312	ARE	AAACCA	1687	6	-	Zea mays	anaerobic induction
CP_A09g00312	ATC-motif	TGCTATCCA	930	9	-	Pisum sativum	light responsive element
CP_A09g00312	AE-box	AGAAACAA	566	8	+	Arabidopsis thaliana	light responsive element
CP_A09g00312	Box 4	ATTAAT	21	6	+	Petroselinum crispum	light responsive element
CP_A09g00312	Box 4	ATTAAT	230	6	+	Petroselinum crispum	light responsive element
CP_A09g00312	Box 4	ATTAAT	258	6	+	Petroselinum crispum	light responsive element
CP_A09g00312	Box 4	ATTAAT	297	6	+	Petroselinum crispum	light responsive element
CP_A09g00312	Box 4	ATTAAT	537	6	+	Petroselinum crispum	light responsive element
CP_A09g00312	GARE-motif	TCTGTTG	1016	7	+	Brassica oleracea	gibberellin-responsive element
CP_A09g00312	O2-site	GATGA(C/T)(A/G)TG(A/G)	1001	8	+	Zea mays	zein metabolism regulation
CP_A09g00312	O2-site	GATGACATGG	1439	9	+	Zea mays	zein metabolism regulation
CP_A09g00312	G-Box	CACGTG	766	6	+	Pisum sativum	light responsive element
CP_A09g00312	G-box	CACGTG	766	6	+	Arabidopsis thaliana	light responsive element
CP_A09g00312	G-box	CACGAC	984	6	-	Zea mays	light responsive element
CP_A09g00312	G-box	CACGTC	1292	6	-	Zea mays	light responsive element
CP_A09g00312	AT1-motif	AATTATTTTTTATT	688	13	-	Solanum tuberosum	light responsive element
CP_A09g00312	TCA-element	CCATCTTTTT	1906	9	+	Nicotiana tabacum	salicylic acid responsiveness
CP_A09g00312	GA-motif	ATAGATAA	831	8	-	Arabidopsis thaliana	light responsive element
CP_A09g00312	circadian	CAAAGATATC	937	9	+	Lycopersicon esculentum	circadian control
CP_A09g00610	GT1-motif	GGTTAAT	1925	7	+	Avena sativa	light responsive element
CP_A09g00610	TGACG-motif	TGACG	60	5	+	Hordeum vulgare	MeJA-responsiveness
CP_A09g00610	TGACG-motif	TGACG	334	5	+	Hordeum vulgare	MeJA-responsiveness
CP_A09g00610	ARE	AAACCA	472	6	+	Zea mays	anaerobic induction
CP_A09g00610	ARE	AAACCA	1021	6	+	Zea mays	anaerobic induction
CP_A09g00610	ARE	AAACCA	1915	6	-	Zea mays	anaerobic induction
CP_A09g00610	ARE	AAACCA	1981	6	+	Zea mays	anaerobic induction
CP_A09g00610	GCN4_motif	TGAGTCA	1286	7	-	Oryza sativa	endosperm expression
CP_A09g00610	GCN4_motif	TGAGTCA	1547	7	-	Oryza sativa	endosperm expression
CP_A09g00610	Box 4	ATTAAT	305	6	+	Petroselinum crispum	light responsive element
CP_A09g00610	Box 4	ATTAAT	771	6	+	Petroselinum crispum	light responsive element
CP_A09g00610	Box 4	ATTAAT	893	6	+	Petroselinum crispum	light responsive element
CP_A09g00610	Box 4	ATTAAT	997	6	+	Petroselinum crispum	light responsive element
CP_A09g00610	G-box	TACGTG	908	6	+	Arabidopsis thaliana	light responsive element
CP_A09g00610	CAT-box	GCCACT	1939	6	+	Arabidopsis thaliana	meristem expression
CP_A09g00610	GC-motif	CCCCCG	928	6	-	Zea mays	anaerobic induction
CP_A09g00610	TCA-element	TCAGAAGAGG	1517	9	+	Brassica oleracea	salicylic acid responsiveness
CP_A09g00610	TCA-element	TCAGAAGAGG	1877	9	-	Brassica oleracea	salicylic acid responsiveness
CP_A09g00610	CGTCA-motif	CGTCA	60	5	-	Hordeum vulgare	MeJA-responsiveness
CP_A09g00610	CGTCA-motif	CGTCA	334	5	-	Hordeum vulgare	MeJA-responsiveness
CP_A09g00610	I-box	GTATAAGGCC	96	9	-	Larix laricina	light responsive element
CP_A09g00610	TC-rich repeats	ATTCTCTAAC	573	9	-	Nicotiana tabacum	defense and stress responsiveness
CP_A09g00610	TCCC-motif	TCTCCCT	1894	7	+	Spinacia oleracea	light responsive element
CP_A09g00610	ABRE	ACGTG	909	5	+	Arabidopsis thaliana	abscisic acid responsiveness
CP_A09g00610	TCT-motif	TCTTAC	905	6	+	Arabidopsis thaliana	light responsive element
CP_A09g00610	TCT-motif	TCTTAC	1618	6	+	Arabidopsis thaliana	light responsive element
CP_A09g00610	MRE	AACCTAA	1461	7	+	Petroselinum crispum	light responsive element
CP_A09g00712	LTR	CCGAAA	649	6	-	Hordeum vulgare	low-temperature responsiveness
CP_A09g00712	ARE	AAACCA	234	6	-	Zea mays	anaerobic induction
CP_A09g00712	ARE	AAACCA	781	6	+	Zea mays	anaerobic induction
CP_A09g00712	ARE	AAACCA	1745	6	+	Zea mays	anaerobic induction
CP_A09g00712	TGACG-motif	TGACG	374	5	-	Hordeum vulgare	MeJA-responsiveness
CP_A09g00712	TGACG-motif	TGACG	586	5	-	Hordeum vulgare	MeJA-responsiveness
CP_A09g00712	TGACG-motif	TGACG	1779	5	-	Hordeum vulgare	MeJA-responsiveness
CP_A09g00712	AuxRR-core	GGTCCAT	1597	7	-	Nicotiana tabacum	auxin-responsive element
CP_A09g00712	CGTCA-motif	CGTCA	374	5	+	Hordeum vulgare	MeJA-responsiveness
CP_A09g00712	CGTCA-motif	CGTCA	586	5	+	Hordeum vulgare	MeJA-responsiveness
CP_A09g00712	CGTCA-motif	CGTCA	1779	5	+	Hordeum vulgare	MeJA-responsiveness
CP_A09g00712	TCA-element	CCATCTTTTT	135	10	+	Nicotiana tabacum	salicylic acid responsiveness
CP_A09g00712	CAT-box	GCCACT	6	6	-	Arabidopsis thaliana	meristem expression
CP_A09g00712	G-box	CACGAC	1682	6	+	Zea mays	light responsive element
CP_A09g00712	O2-site	GATGATGTGG	60	9	+	Zea mays	zein metabolism regulation
CP_A09g00712	O2-site	GATGATGTGG	560	9	+	Zea mays	zein metabolism regulation
CP_A09g00712	Box 4	ATTAAT	356	6	+	Petroselinum crispum	light responsive element
CP_A09g00712	Box 4	ATTAAT	1359	6	-	Petroselinum crispum	light responsive element
CP_A09g00712	TC-rich repeats	GTTTTCTTAC	916	9	+	Nicotiana tabacum	defense and stress responsiveness
CP_A09g00712	TC-rich repeats	GTTTTCTTAC	1095	9	+	Nicotiana tabacum	defense and stress responsiveness
CP_A09g00712	P-box	CAACAAACCCCTT	521	12	-	Petroselinum crispum	gibberellin-responsive element
CP_A09g00712	TCT-motif	TCTTAC	1099	6	+	Arabidopsis thaliana	light responsive element
CP_A09g00712	TCT-motif	TCTTAC	1695	6	+	Arabidopsis thaliana	light responsive element
CP_A09g01241	RY-element	CATGCATG	1572	8	-	Helianthus annuus	seed-specific regulation
CP_A09g01241	MBS	CAACTG	614	6	+	Arabidopsis thaliana	drought-inducibility
CP_A09g01241	MBS	CAACTG	1737	6	+	Arabidopsis thaliana	drought-inducibility
CP_A09g01241	GATA-motif	AAGATAAGATT	69	10	-	Arabidopsis thaliana	light responsive element
CP_A09g01241	LAMP-element	CTTTATCA	635	8	+	Pisum sativum	light responsive element
CP_A09g01241	CAT-box	GCCACT	727	6	+	Arabidopsis thaliana	meristem expression
CP_A09g01241	G-box	CACGAC	1732	6	+	Zea mays	light responsive element
CP_A09g01241	GARE-motif	TCTGTTG	805	7	+	Brassica oleracea	gibberellin-responsive element
CP_A09g01241	Box 4	ATTAAT	460	6	+	Petroselinum crispum	light responsive element
CP_A09g01241	Box 4	ATTAAT	992	6	+	Petroselinum crispum	light responsive element
CP_A09g01241	Box 4	ATTAAT	1255	6	-	Petroselinum crispum	light responsive element
CP_A09g01241	CGTCA-motif	CGTCA	780	5	-	Hordeum vulgare	MeJA-responsiveness
CP_A09g01241	GC-motif	CCCCCG	751	6	+	Zea mays	anaerobic induction
CP_A09g01241	TCA-element	CCATCTTTTT	1416	9	-	Nicotiana tabacum	salicylic acid responsiveness
CP_A09g01241	TGACG-motif	TGACG	780	5	+	Hordeum vulgare	MeJA-responsiveness
CP_A09g01241	TGA-element	AACGAC	1693	6	-	Brassica oleracea	auxin-responsive element
CP_A09g01241	GT1-motif	GGTTAA	115	6	+	Arabidopsis thaliana	light responsive element
CP_A09g01241	Sp1	GGGCGG	703	6	-	Oryza sativa	light responsive element
CP_A09g01241	ARE	AAACCA	375	6	+	Zea mays	anaerobic induction
CP_A09g01241	ARE	AAACCA	919	6	-	Zea mays	anaerobic induction
CP_A09g01241	ARE	AAACCA	1127	6	+	Zea mays	anaerobic induction
CP_A10g00582	MBSI	aaaAaaC(G/C)GTTA	888	10.5	-	Petunia hybrida	flavonoid biosynthetic genes regulation
CP_A10g00582	TC-rich repeats	ATTCTCTAAC	1342	9	+	Nicotiana tabacum	defense and stress responsiveness
CP_A10g00582	MBS	CAACTG	745	6	+	Arabidopsis thaliana	drought-inducibility
CP_A10g00582	HD-Zip 1	CAAT(A/T)ATTG	352	8.5	+	Arabidopsis thaliana	palisade mesophyll cells
CP_A10g00582	ABRE	ACGTG	205	5	+	Arabidopsis thaliana	abscisic acid responsiveness
CP_A10g00582	ABRE	ACGTG	1385	5	+	Arabidopsis thaliana	abscisic acid responsiveness
CP_A10g00582	TCT-motif	TCTTAC	1033	6	+	Arabidopsis thaliana	light responsive element
CP_A10g00582	GATA-motif	AAGATAAGATT	1503	10	-	Arabidopsis thaliana	light responsive element
CP_A10g00582	GATA-motif	AAGGATAAGG	1560	9	+	Solanum tuberosum	light responsive element
CP_A10g00582	3-AF1 binding site	TAAGAGAGGAA	428	10	+	Solanum tuberosum	light responsive element
CP_A10g00582	MRE	AACCTAA	716	7	+	Petroselinum crispum	light responsive element
CP_A10g00582	chs-CMA1a	TTACTTAA	1069	8	-	Daucus carota	light responsive element
CP_A10g00582	GT1-motif	GGTTAA	714	6	-	Arabidopsis thaliana	light responsive element
CP_A10g00582	GT1-motif	GGTTAA	950	6	+	Arabidopsis thaliana	light responsive element
CP_A10g00582	TGACG-motif	TGACG	1645	5	-	Hordeum vulgare	MeJA-responsiveness
CP_A10g00582	TGACG-motif	TGACG	1780	5	-	Hordeum vulgare	MeJA-responsiveness
CP_A10g00582	TGACG-motif	TGACG	1879	5	-	Hordeum vulgare	MeJA-responsiveness
CP_A10g00582	ARE	AAACCA	348	6	+	Zea mays	anaerobic induction
CP_A10g00582	ARE	AAACCA	909	6	-	Zea mays	anaerobic induction
CP_A10g00582	LTR	CCGAAA	1872	6	+	Hordeum vulgare	low-temperature responsiveness
CP_A10g00582	Box 4	ATTAAT	264	6	+	Petroselinum crispum	light responsive element
CP_A10g00582	Box 4	ATTAAT	1416	6	-	Petroselinum crispum	light responsive element
CP_A10g00582	G-Box	CACGTT	204	6	-	Pisum sativum	light responsive element
CP_A10g00582	G-Box	CACGTT	1384	6	-	Pisum sativum	light responsive element
CP_A10g00582	GARE-motif	TCTGTTG	1914	7	+	Brassica oleracea	gibberellin-responsive element
CP_A10g00582	G-box	TAAACGTG	202	8	+	Brassica oleracea	light responsive element
CP_A10g00582	TCA-element	CCATCTTTTT	1139	9	-	Nicotiana tabacum	salicylic acid responsiveness
CP_A10g00582	CGTCA-motif	CGTCA	1645	5	+	Hordeum vulgare	MeJA-responsiveness
CP_A10g00582	CGTCA-motif	CGTCA	1780	5	+	Hordeum vulgare	MeJA-responsiveness
CP_A10g00582	CGTCA-motif	CGTCA	1879	5	+	Hordeum vulgare	MeJA-responsiveness
CP_A10g00662	P-box	CCTTTTG	1029	7	+	Oryza sativa	gibberellin-responsive element
CP_A10g00662	GATA-motif	GATAGGG	960	7	-	Pisum sativum	light responsive element
CP_A10g00662	ABRE	ACGTG	1596	5	-	Arabidopsis thaliana	abscisic acid responsiveness
CP_A10g00662	ABRE	ACGTG	1860	5	+	Arabidopsis thaliana	abscisic acid responsiveness
CP_A10g00662	AE-box	AGAAACAA	1078	8	-	Arabidopsis thaliana	light responsive element
CP_A10g00662	ARE	AAACCA	409	6	+	Zea mays	anaerobic induction
CP_A10g00662	Sp1	GGGCGG	235	6	+	Oryza sativa	light responsive element
CP_A10g00662	TGA-element	AACGAC	1648	6	+	Brassica oleracea	auxin-responsive element
CP_A10g00662	TGACG-motif	TGACG	1526	5	+	Hordeum vulgare	MeJA-responsiveness
CP_A10g00662	TGACG-motif	TGACG	1598	5	-	Hordeum vulgare	MeJA-responsiveness
CP_A10g00662	TGACG-motif	TGACG	1740	5	+	Hordeum vulgare	MeJA-responsiveness
CP_A10g00662	TGACG-motif	TGACG	1902	5	+	Hordeum vulgare	MeJA-responsiveness
CP_A10g00662	CGTCA-motif	CGTCA	1526	5	-	Hordeum vulgare	MeJA-responsiveness
CP_A10g00662	CGTCA-motif	CGTCA	1598	5	+	Hordeum vulgare	MeJA-responsiveness
CP_A10g00662	CGTCA-motif	CGTCA	1740	5	-	Hordeum vulgare	MeJA-responsiveness
CP_A10g00662	CGTCA-motif	CGTCA	1902	5	-	Hordeum vulgare	MeJA-responsiveness
CP_A10g00662	G-box	CACGAC	868	6	-	Zea mays	light responsive element
CP_A10g00662	G-box	CACGTC	1596	6	+	Zea mays	light responsive element
CP_A10g00662	G-box	TACGTG	1859	6	+	Arabidopsis thaliana	light responsive element
CP_A10g00662	Box 4	ATTAAT	849	6	+	Petroselinum crispum	light responsive element
CP_A10g00662	Box 4	ATTAAT	1880	6	-	Petroselinum crispum	light responsive element
CP_A10g00662	GCN4_motif	TGAGTCA	1799	7	-	Oryza sativa	endosperm expression
CP_A10g00662	GCN4_motif	TGAGTCA	1932	7	-	Oryza sativa	endosperm expression
CP_A10g00662	O2-site	GATGACATGG	730	9	+	Zea mays	zein metabolism regulation
CP_A10g00662	O2-site	GATGA(C/T)(A/G)TG(A/G)	1061	8	-	Zea mays	zein metabolism regulation
CP_A10g00662	O2-site	GATGA(C/T)(A/G)TG(A/G)	1095	8	-	Zea mays	zein metabolism regulation
CP_A10g00662	O2-site	GATGATGTGG	1432	9	-	Zea mays	zein metabolism regulation
CP_A10g00662	O2-site	GATGA(C/T)(A/G)TG(A/G)	1595	8	-	Zea mays	zein metabolism regulation
CP_A10g00664	Box 4	ATTAAT	455	6	+	Petroselinum crispum	light responsive element
CP_A10g00664	Box 4	ATTAAT	459	6	+	Petroselinum crispum	light responsive element
CP_A10g00664	G-box	CACGAC	774	6	+	Zea mays	light responsive element
CP_A10g00664	chs-CMA1a	TTACTTAA	177	8	+	Daucus carota	light responsive element
CP_A10g00664	ARE	AAACCA	1086	6	+	Zea mays	anaerobic induction
CP_A10g00664	ARE	AAACCA	1164	6	-	Zea mays	anaerobic induction
CP_A10g00664	ATC-motif	AGTAATCT	734	8	-	Spinacia oleracea	light responsive element
CP_A10g00664	MBS	CAACTG	214	6	+	Arabidopsis thaliana	drought-inducibility
CP_A10g00664	MBS	CAACTG	1771	6	-	Arabidopsis thaliana	drought-inducibility
CP_A10g00664	TCCC-motif	TCTCCCT	148	7	+	Spinacia oleracea	light responsive element
CP_A10g00664	GATA-motif	GATAGGA	1155	7	-	Arabidopsis thaliana	light responsive element
CP_A10g00948	GATA-motif	GATAGGA	1872	7	+	Arabidopsis thaliana	light responsive element
CP_A10g00948	MBS	CAACTG	1532	6	-	Arabidopsis thaliana	drought-inducibility
CP_A10g00948	LTR	CCGAAA	1412	6	+	Hordeum vulgare	low-temperature responsiveness
CP_A10g00948	LTR	CCGAAA	1745	6	-	Hordeum vulgare	low-temperature responsiveness
CP_A10g00948	GT1-motif	GGTTAAT	263	7	+	Avena sativa	light responsive element
CP_A10g00948	GT1-motif	GGTTAA	1321	6	+	Arabidopsis thaliana	light responsive element
CP_A10g00948	ACE	CTAACGTATT	360	9	+	Petroselinum crispum	light responsive element
CP_A10g00948	TGA-element	AACGAC	913	6	-	Brassica oleracea	auxin-responsive element
CP_A10g00948	AuxRR-core	GGTCCAT	1582	7	-	Nicotiana tabacum	auxin-responsive element
CP_A10g00948	CGTCA-motif	CGTCA	868	5	-	Hordeum vulgare	MeJA-responsiveness
CP_A10g00948	Box 4	ATTAAT	507	6	+	Petroselinum crispum	light responsive element
CP_A10g00948	Box 4	ATTAAT	974	6	+	Petroselinum crispum	light responsive element
CP_A10g00948	Box 4	ATTAAT	1104	6	-	Petroselinum crispum	light responsive element
CP_A10g00948	Box 4	ATTAAT	1333	6	-	Petroselinum crispum	light responsive element
CP_A10g00948	G-box	CACGAC	702	6	+	Zea mays	light responsive element
CP_A10g00948	G-box	CACGAC	745	6	+	Zea mays	light responsive element
CP_A10g00948	G-box	CACGTG	760	6	+	Arabidopsis thaliana	light responsive element
CP_A10g00948	G-box	GCCACGTGGA	804	9	-	Arabidopsis thaliana	light responsive element
CP_A10g00948	G-box	CACGTG	806	6	+	Arabidopsis thaliana	light responsive element
CP_A10g00948	G-box	TACGTG	894	6	+	Arabidopsis thaliana	light responsive element
CP_A10g00948	G-box	TACGTG	1373	6	-	Arabidopsis thaliana	light responsive element
CP_A10g00948	G-box	CACGAC	1855	6	-	Zea mays	light responsive element
CP_A10g00948	TC-rich repeats	ATTCTCTAAC	1438	10	-	Nicotiana tabacum	defense and stress responsiveness
CP_A10g00948	TC-rich repeats	ATTCTCTAAC	1487	9	+	Nicotiana tabacum	defense and stress responsiveness
CP_A10g00948	ABRE	CACGTG	760	6	+	Arabidopsis thaliana	abscisic acid responsiveness
CP_A10g00948	ABRE	ACGTG	761	5	+	Arabidopsis thaliana	abscisic acid responsiveness
CP_A10g00948	ABRE	CACGTG	806	6	+	Arabidopsis thaliana	abscisic acid responsiveness
CP_A10g00948	ABRE	ACGTG	807	5	+	Arabidopsis thaliana	abscisic acid responsiveness
CP_A10g00948	ABRE	ACGTG	895	5	+	Arabidopsis thaliana	abscisic acid responsiveness
CP_A10g00948	ABRE	GCAACGTGTC	1260	9	-	Hordeum vulgare	abscisic acid responsiveness
CP_A10g00948	ABRE	ACGTG	1262	5	-	Arabidopsis thaliana	abscisic acid responsiveness
CP_A10g00948	ABRE	ACGTG	1373	5	-	Arabidopsis thaliana	abscisic acid responsiveness
CP_A10g00948	ATC-motif	AGTAATCT	567	8	+	Spinacia oleracea	light responsive element
CP_A10g00948	ARE	AAACCA	1358	6	-	Zea mays	anaerobic induction
CP_A10g00948	TGACG-motif	TGACG	868	5	+	Hordeum vulgare	MeJA-responsiveness
CP_A10g00948	GCN4_motif	TGAGTCA	1144	7	-	Oryza sativa	endosperm expression
CP_A10g00948	G-Box	CACGTG	760	6	+	Pisum sativum	light responsive element
CP_A10g00948	G-Box	CACGTG	806	6	+	Pisum sativum	light responsive element
CP_A10g00948	G-Box	CACGTT	1262	6	+	Pisum sativum	light responsive element
CP_A10g00948	TATC-box	TATCCCA	1869	7	-	Oryza sativa	gibberellin-responsive element
CP_A10g01204	WUN-motif	AAATTTCCT	1211	9	+	Brassica oleracea	wound-responsive element
CP_A10g01204	TC-rich repeats	GTTTTCTTAC	1394	9	-	Nicotiana tabacum	defense and stress responsiveness
CP_A10g01204	TC-rich repeats	ATTCTCTAAC	1461	9	+	Nicotiana tabacum	defense and stress responsiveness
CP_A10g01204	TCT-motif	TCTTAC	1269	6	+	Arabidopsis thaliana	light responsive element
CP_A10g01204	MBS	CAACTG	1752	6	+	Arabidopsis thaliana	drought-inducibility
CP_A10g01204	RY-element	CATGCATG	1978	8	-	Helianthus annuus	seed-specific regulation
CP_A10g01204	ABRE	ACGTG	510	5	+	Arabidopsis thaliana	abscisic acid responsiveness
CP_A10g01204	ABRE	AACCCGG	741	7	+	Arabidopsis thaliana	abscisic acid responsiveness
CP_A10g01204	ABRE	ACGTG	1991	5	-	Arabidopsis thaliana	abscisic acid responsiveness
CP_A10g01204	ARE	AAACCA	1616	6	+	Zea mays	anaerobic induction
CP_A10g01204	ARE	AAACCA	1870	6	+	Zea mays	anaerobic induction
CP_A10g01204	LTR	CCGAAA	106	6	-	Hordeum vulgare	low-temperature responsiveness
CP_A10g01204	chs-Unit 1 m1	ACCTAACCCGG	737	10	+	Zea mays	light responsive element
CP_A10g01204	TGACG-motif	TGACG	508	5	+	Hordeum vulgare	MeJA-responsiveness
CP_A10g01204	GC-motif	CCCCCG	699	6	+	Zea mays	anaerobic induction
CP_A10g01204	CGTCA-motif	CGTCA	508	5	-	Hordeum vulgare	MeJA-responsiveness
CP_A10g01204	ATCT-motif	AATCTAATCC	1179	9	-	Pisum sativum	light responsive element
CP_A10g01204	Box 4	ATTAAT	1059	6	-	Petroselinum crispum	light responsive element
CP_A10g01204	Box 4	ATTAAT	1091	6	-	Petroselinum crispum	light responsive element
CP_A10g01204	O2-site	GATGACATGG	5	9	+	Zea mays	zein metabolism regulation
CP_A10g01204	O2-site	GTTGACGTGA	506	9	+	Zea mays	zein metabolism regulation
CP_A10g01204	O2-site	GATGACATGG	1942	9	-	Zea mays	zein metabolism regulation
CP_A10g01204	GCN4_motif	TGAGTCA	280	7	+	Oryza sativa	endosperm expression
CP_A10g01204	CAT-box	GCCACT	75	6	-	Arabidopsis thaliana	meristem expression
CP_A10g01204	G-box	CACGTC	509	6	-	Zea mays	light responsive element
CP_A10g01204	G-box	CACGAC	781	6	+	Zea mays	light responsive element
CP_A10g01204	G-box	TACGTG	1991	6	-	Arabidopsis thaliana	light responsive element
CP_A10g01204	Gap-box	CAAATGAA(A/G)A	920	9.5	-	Arabidopsis thaliana	light responsive element
CP_A10g01363	LTR	CCGAAA	1174	6	-	Hordeum vulgare	low-temperature responsiveness
CP_A10g01363	AE-box	AGAAACAA	746	8	+	Arabidopsis thaliana	light responsive element
CP_A10g01363	ARE	AAACCA	355	6	+	Zea mays	anaerobic induction
CP_A10g01363	ARE	AAACCA	366	6	+	Zea mays	anaerobic induction
CP_A10g01363	ARE	AAACCA	805	6	-	Zea mays	anaerobic induction
CP_A10g01363	ARE	AAACCA	1372	6	+	Zea mays	anaerobic induction
CP_A10g01363	ARE	AAACCA	1596	6	-	Zea mays	anaerobic induction
CP_A10g01363	TGACG-motif	TGACG	526	5	+	Hordeum vulgare	MeJA-responsiveness
CP_A10g01363	GT1-motif	GGTTAA	1206	6	+	Arabidopsis thaliana	light responsive element
CP_A10g01363	CGTCA-motif	CGTCA	526	5	-	Hordeum vulgare	MeJA-responsiveness
CP_A10g01363	circadian	CAAAGATATC	1920	9	-	Lycopersicon esculentum	circadian control
CP_A10g01363	G-box	CACGTG	1942	6	-	Arabidopsis thaliana	light responsive element
CP_A10g01363	G-box	CACGTG	1955	6	-	Arabidopsis thaliana	light responsive element
CP_A10g01363	G-Box	CACGTG	1942	6	-	Pisum sativum	light responsive element
CP_A10g01363	G-Box	CACGTG	1955	6	-	Pisum sativum	light responsive element
CP_A10g01363	Box 4	ATTAAT	659	6	+	Petroselinum crispum	light responsive element
CP_A10g01363	Box 4	ATTAAT	671	6	+	Petroselinum crispum	light responsive element
CP_A10g01363	Box 4	ATTAAT	1084	6	-	Petroselinum crispum	light responsive element
CP_A10g01363	Box 4	ATTAAT	1848	6	-	Petroselinum crispum	light responsive element
CP_A10g01363	GATA-motif	GATAGGG	928	7	+	Pisum sativum	light responsive element
CP_A10g01363	ABRE	CACGTG	1942	6	-	Arabidopsis thaliana	abscisic acid responsiveness
CP_A10g01363	ABRE	ACGTG	1943	5	+	Arabidopsis thaliana	abscisic acid responsiveness
CP_A10g01363	ABRE	CACGTG	1955	6	-	Arabidopsis thaliana	abscisic acid responsiveness
CP_A10g01363	ABRE	ACGTG	1956	5	+	Arabidopsis thaliana	abscisic acid responsiveness
CP_A10g01363	MBS	CAACTG	92	6	+	Arabidopsis thaliana	drought-inducibility
CP_A16g00063	ABRE	CACGTG	775	6	+	Arabidopsis thaliana	abscisic acid responsiveness
CP_A16g00063	ABRE	ACGTG	776	5	+	Arabidopsis thaliana	abscisic acid responsiveness
CP_A16g00063	ABRE	CACGTG	839	6	+	Arabidopsis thaliana	abscisic acid responsiveness
CP_A16g00063	ABRE	ACGTG	840	5	+	Arabidopsis thaliana	abscisic acid responsiveness
CP_A16g00063	GATA-motif	AAGATAAGATT	1195	10	+	Arabidopsis thaliana	light responsive element
CP_A16g00063	TGACG-motif	TGACG	1767	5	-	Hordeum vulgare	MeJA-responsiveness
CP_A16g00063	ACE	GACACGTATG	1724	9	+	Petroselinum crispum	light responsive element
CP_A16g00063	AE-box	AGAAACAA	27	8	+	Arabidopsis thaliana	light responsive element
CP_A16g00063	AE-box	AGAAACTT	465	8	-	Arabidopsis thaliana	light responsive element
CP_A16g00063	ARE	AAACCA	580	6	+	Zea mays	anaerobic induction
CP_A16g00063	G-box	CACGTG	775	6	+	Arabidopsis thaliana	light responsive element
CP_A16g00063	G-box	CACGTG	839	6	+	Arabidopsis thaliana	light responsive element
CP_A16g00063	CAT-box	GCCACT	519	6	-	Arabidopsis thaliana	meristem expression
CP_A16g00063	Box 4	ATTAAT	760	6	+	Petroselinum crispum	light responsive element
CP_A16g00063	Box 4	ATTAAT	1391	6	-	Petroselinum crispum	light responsive element
CP_A16g00063	G-Box	CACGTG	775	6	+	Pisum sativum	light responsive element
CP_A16g00063	G-Box	CACGTG	839	6	+	Pisum sativum	light responsive element
CP_A16g00063	GCN4_motif	TGAGTCA	1211	7	-	Oryza sativa	endosperm expression
CP_A16g00063	O2-site	GATGATGTGG	1478	9	-	Zea mays	zein metabolism regulation
CP_A16g00063	I-box	TGATAATGT	119	9	+	Solanum tuberosum	light responsive element
CP_A16g00063	CGTCA-motif	CGTCA	1767	5	+	Hordeum vulgare	MeJA-responsiveness
CP_B04g01969	LAMP-element	CTTTATCA	1290	8	+	Pisum sativum	light responsive element
CP_B04g01969	ABRE	CACGTG	975	6	+	Arabidopsis thaliana	abscisic acid responsiveness
CP_B04g01969	ABRE	ACGTG	976	5	+	Arabidopsis thaliana	abscisic acid responsiveness
CP_B04g01969	ABRE	CACGTG	1039	6	-	Arabidopsis thaliana	abscisic acid responsiveness
CP_B04g01969	ABRE	ACGTG	1040	5	+	Arabidopsis thaliana	abscisic acid responsiveness
CP_B04g01969	P-box	CCTTTTG	395	7	+	Oryza sativa	gibberellin-responsive element
CP_B04g01969	TCT-motif	TCTTAC	1251	6	-	Arabidopsis thaliana	light responsive element
CP_B04g01969	GT1-motif	GGTTAA	1320	6	-	Arabidopsis thaliana	light responsive element
CP_B04g01969	AE-box	AGAAACTT	670	8	-	Arabidopsis thaliana	light responsive element
CP_B04g01969	ARE	AAACCA	785	6	+	Zea mays	anaerobic induction
CP_B04g01969	CAT-box	GCCACT	724	6	-	Arabidopsis thaliana	meristem expression
CP_B04g01969	G-box	CACGTG	975	6	+	Arabidopsis thaliana	light responsive element
CP_B04g01969	G-box	CACGTG	1039	6	-	Arabidopsis thaliana	light responsive element
CP_B04g01969	O2-site	GATGATGTGG	1744	9	-	Zea mays	zein metabolism regulation
CP_B04g01969	GCN4_motif	TGAGTCA	1489	7	-	Oryza sativa	endosperm expression
CP_B04g01969	G-Box	CACGTG	975	6	+	Pisum sativum	light responsive element
CP_B04g01969	G-Box	CACGTG	1039	6	-	Pisum sativum	light responsive element
CP_B04g01969	Box 4	ATTAAT	1482	6	-	Petroselinum crispum	light responsive element
CP_B04g01969	Box 4	ATTAAT	1657	6	-	Petroselinum crispum	light responsive element
CP_B04g01969	I-box	TGATAATGT	329	9	+	Solanum tuberosum	light responsive element
CP_B04g01969	I-box	TAGATAACC	1509	9	-	Pisum sativum	light responsive element
CP_B04g01969	GA-motif	ATAGATAA	1511	8	-	Arabidopsis thaliana	light responsive element
CP_B11g00306	ABRE	ACGTG	567	5	+	Arabidopsis thaliana	abscisic acid responsiveness
CP_B11g00306	ABRE	AACCCGG	896	7	+	Arabidopsis thaliana	abscisic acid responsiveness
CP_B11g00306	ABRE	ACGTG	1623	5	-	Arabidopsis thaliana	abscisic acid responsiveness
CP_B11g00306	ARE	AAACCA	505	6	-	Zea mays	anaerobic induction
CP_B11g00306	ARE	AAACCA	1070	6	-	Zea mays	anaerobic induction
CP_B11g00306	ARE	AAACCA	1403	6	+	Zea mays	anaerobic induction
CP_B11g00306	AE-box	AGAAACAA	1101	8	+	Arabidopsis thaliana	light responsive element
CP_B11g00306	LTR	CCGAAA	1731	6	-	Hordeum vulgare	low-temperature responsiveness
CP_B11g00306	LTR	CCGAAA	1757	6	-	Hordeum vulgare	low-temperature responsiveness
CP_B11g00306	GT1-motif	GGTTAA	1041	6	-	Arabidopsis thaliana	light responsive element
CP_B11g00306	TGA-element	AACGAC	728	6	+	Brassica oleracea	auxin-responsive element
CP_B11g00306	TCA-element	CCATCTTTTT	1798	10	+	Nicotiana tabacum	salicylic acid responsiveness
CP_B11g00306	ATCT-motif	AATCTAATCC	1537	9	-	Pisum sativum	light responsive element
CP_B11g00306	AuxRR-core	GGTCCAT	23	7	+	Nicotiana tabacum	auxin-responsive element
CP_B11g00306	Box 4	ATTAAT	1191	6	-	Petroselinum crispum	light responsive element
CP_B11g00306	Box 4	ATTAAT	1584	6	-	Petroselinum crispum	light responsive element
CP_B11g00306	Box 4	ATTAAT	1599	6	-	Petroselinum crispum	light responsive element
CP_B11g00306	O2-site	GATGATGTGG	183	9	+	Zea mays	zein metabolism regulation
CP_B11g00306	CAT-box	GCCACT	1750	6	-	Arabidopsis thaliana	meristem expression
CP_B11g00306	G-box	CACGAC	518	6	-	Zea mays	light responsive element
CP_B11g00306	G-box	CACGTC	566	6	-	Zea mays	light responsive element
CP_B11g00306	G-box	ACACGTG(G/t)CACC	1622	10.5	+	Lycopersicon esculentum	light responsive element
CP_B11g00306	G-box	TACGTG	1623	6	-	Arabidopsis thaliana	light responsive element
CP_B11g00306	AT1-motif	AATTATTTTTTATT	1377	13	+	Solanum tuberosum	light responsive element
CP_B11g00570	ARE	AAACCA	968	6	+	Zea mays	anaerobic induction
CP_B11g00570	ARE	AAACCA	1344	6	-	Zea mays	anaerobic induction
CP_B11g00570	ARE	AAACCA	1383	6	-	Zea mays	anaerobic induction
CP_B11g00570	ARE	AAACCA	1394	6	+	Zea mays	anaerobic induction
CP_B11g00570	AE-box	AGAAACAA	1328	8	-	Arabidopsis thaliana	light responsive element
CP_B11g00570	GT1-motif	GGTTAAT	1120	7	+	Avena sativa	light responsive element
CP_B11g00570	TGACG-motif	TGACG	1512	5	+	Hordeum vulgare	MeJA-responsiveness
CP_B11g00570	TCA-element	CCATCTTTTT	1128	9	-	Nicotiana tabacum	salicylic acid responsiveness
CP_B11g00570	CGTCA-motif	CGTCA	1512	5	-	Hordeum vulgare	MeJA-responsiveness
CP_B11g00570	GARE-motif	TCTGTTG	1579	7	-	Brassica oleracea	gibberellin-responsive element
CP_B11g00570	G-Box	CACGTT	1973	6	+	Pisum sativum	light responsive element
CP_B11g00570	Box 4	ATTAAT	1858	6	-	Petroselinum crispum	light responsive element
CP_B11g00570	AAAC-motif	CAATCAAAACCT	881	11	-	Spinacia oleracea	light responsive element
CP_B11g00570	GATA-motif	AAGATAAGATT	736	10	+	Arabidopsis thaliana	light responsive element
CP_B11g00570	GATA-motif	AAGATAAGATT	1823	10	-	Arabidopsis thaliana	light responsive element
CP_B11g00570	MRE	AACCTAA	121	7	+	Petroselinum crispum	light responsive element
CP_B11g00570	TCCC-motif	TCTCCCT	818	7	-	Spinacia oleracea	light responsive element
CP_B11g00570	TCCC-motif	TCTCCCT	854	7	+	Spinacia oleracea	light responsive element
CP_B11g00570	ABRE	ACGTG	1973	5	-	Arabidopsis thaliana	abscisic acid responsiveness
CP_B11g00571	GC-motif	CCCCCG	1583	6	+	Zea mays	anaerobic induction
CP_B11g00571	TCA-element	CCATCTTTTT	131	9	-	Nicotiana tabacum	salicylic acid responsiveness
CP_B11g00571	CGTCA-motif	CGTCA	515	5	-	Hordeum vulgare	MeJA-responsiveness
CP_B11g00571	CGTCA-motif	CGTCA	1646	5	+	Hordeum vulgare	MeJA-responsiveness
CP_B11g00571	GARE-motif	TCTGTTG	582	7	-	Brassica oleracea	gibberellin-responsive element
CP_B11g00571	G-Box	CACGTT	976	6	+	Pisum sativum	light responsive element
CP_B11g00571	Box 4	ATTAAT	861	6	+	Petroselinum crispum	light responsive element
CP_B11g00571	G-box	CACGTC	1849	6	-	Zea mays	light responsive element
CP_B11g00571	ARE	AAACCA	347	6	-	Zea mays	anaerobic induction
CP_B11g00571	ARE	AAACCA	386	6	-	Zea mays	anaerobic induction
CP_B11g00571	ARE	AAACCA	397	6	+	Zea mays	anaerobic induction
CP_B11g00571	AE-box	AGAAACAA	331	8	-	Arabidopsis thaliana	light responsive element
CP_B11g00571	GT1-motif	GGTTAAT	123	7	+	Avena sativa	light responsive element
CP_B11g00571	chs-CMA2a	TCACTTGA	1356	8	+	Petroselinum crispum	light responsive element
CP_B11g00571	TGACG-motif	TGACG	515	5	+	Hordeum vulgare	MeJA-responsiveness
CP_B11g00571	TGACG-motif	TGACG	1646	5	-	Hordeum vulgare	MeJA-responsiveness
CP_B11g00571	TGA-element	AACGAC	1120	6	+	Brassica oleracea	auxin-responsive element
CP_B11g00571	GATA-motif	AAGATAAGATT	826	10	-	Arabidopsis thaliana	light responsive element
CP_B11g00571	TCCC-motif	TCTCCCT	1545	7	-	Spinacia oleracea	light responsive element
CP_B11g00571	MBS	CAACTG	1081	6	-	Arabidopsis thaliana	drought-inducibility
CP_B11g00571	MBS	CAACTG	1181	6	+	Arabidopsis thaliana	drought-inducibility
CP_B11g00571	MBS	CAACTG	1750	6	+	Arabidopsis thaliana	drought-inducibility
CP_B11g00571	ABRE	ACGTG	976	5	-	Arabidopsis thaliana	abscisic acid responsiveness
CP_B11g00571	ABRE	ACGTG	1850	5	+	Arabidopsis thaliana	abscisic acid responsiveness
CP_B11g01262	Box 4	ATTAAT	1315	6	-	Petroselinum crispum	light responsive element
CP_B11g01262	GARE-motif	TCTGTTG	1939	7	-	Brassica oleracea	gibberellin-responsive element
CP_B11g01262	G-Box	CACGTT	205	6	+	Pisum sativum	light responsive element
CP_B11g01262	G-box	TACGTG	1006	6	-	Arabidopsis thaliana	light responsive element
CP_B11g01262	AT1-motif	AATTATTTTTTATT	979	13	+	Solanum tuberosum	light responsive element
CP_B11g01262	TCA-element	CCATCTTTTT	837	9	-	Nicotiana tabacum	salicylic acid responsiveness
CP_B11g01262	TCA-element	CCATCTTTTT	1045	9	-	Nicotiana tabacum	salicylic acid responsiveness
CP_B11g01262	SARE	TTCGACCATCTT	840	11	-	Nicotiana tabacum	salicylic acid responsiveness
CP_B11g01262	CGTCA-motif	CGTCA	1601	5	+	Hordeum vulgare	MeJA-responsiveness
CP_B11g01262	TGACG-motif	TGACG	1601	5	-	Hordeum vulgare	MeJA-responsiveness
CP_B11g01262	ARE	AAACCA	825	6	+	Zea mays	anaerobic induction
CP_B11g01262	ATC-motif	AGTAATCT	1962	8	-	Spinacia oleracea	light responsive element
CP_B11g01262	Sp1	GGGCGG	224	6	+	Oryza sativa	light responsive element
CP_B11g01262	MBS	CAACTG	534	6	+	Arabidopsis thaliana	drought-inducibility
CP_B11g01262	MBS	CAACTG	1293	6	+	Arabidopsis thaliana	drought-inducibility
CP_B11g01262	MBS	CAACTG	1541	6	+	Arabidopsis thaliana	drought-inducibility
CP_B11g01262	MBS	CAACTG	1846	6	+	Arabidopsis thaliana	drought-inducibility
CP_B11g01262	ABRE	ACGTG	205	5	-	Arabidopsis thaliana	abscisic acid responsiveness
CP_B11g01262	ABRE	ACGTG	1006	5	-	Arabidopsis thaliana	abscisic acid responsiveness
CP_B12g00251	MBS	CAACTG	169	6	+	Arabidopsis thaliana	drought-inducibility
CP_B12g00251	ABRE	ACGTG	75	5	+	Arabidopsis thaliana	abscisic acid responsiveness
CP_B12g00251	ABRE	ACGTG	543	5	+	Arabidopsis thaliana	abscisic acid responsiveness
CP_B12g00251	ABRE	CACGTG	1654	6	-	Arabidopsis thaliana	abscisic acid responsiveness
CP_B12g00251	ABRE	ACGTG	1655	5	+	Arabidopsis thaliana	abscisic acid responsiveness
CP_B12g00251	ABRE	ACGTG	1843	5	+	Arabidopsis thaliana	abscisic acid responsiveness
CP_B12g00251	P-box	CCTTTTG	1134	7	-	Oryza sativa	gibberellin-responsive element
CP_B12g00251	MRE	AACCTAA	447	7	-	Petroselinum crispum	light responsive element
CP_B12g00251	Box 4	ATTAAT	805	6	+	Petroselinum crispum	light responsive element
CP_B12g00251	G-Box	CACGTT	74	6	-	Pisum sativum	light responsive element
CP_B12g00251	G-Box	CACGTG	1654	6	-	Pisum sativum	light responsive element
CP_B12g00251	G-Box	CACGTT	1842	6	-	Pisum sativum	light responsive element
CP_B12g00251	O2-site	GTTGACGTGA	539	9	+	Zea mays	zein metabolism regulation
CP_B12g00251	O2-site	GATGATGTGG	831	9	+	Zea mays	zein metabolism regulation
CP_B12g00251	G-box	CAGACGTGGCA	397	10	+	Nicotiana plumbaginifolia	light responsive element
CP_B12g00251	G-box	CACGTC	542	6	-	Zea mays	light responsive element
CP_B12g00251	G-box	ACACGTGT	1653	8	-	Brassica napus	light responsive element
CP_B12g00251	G-box	CACGTG	1654	6	-	Arabidopsis thaliana	light responsive element
CP_B12g00251	GC-motif	CCCCCG	461	6	-	Zea mays	anaerobic induction
CP_B12g00251	CGTCA-motif	CGTCA	541	5	-	Hordeum vulgare	MeJA-responsiveness
CP_B12g00251	CGTCA-motif	CGTCA	1034	5	+	Hordeum vulgare	MeJA-responsiveness
CP_B12g00251	CGTCA-motif	CGTCA	1897	5	+	Hordeum vulgare	MeJA-responsiveness
CP_B12g00251	AuxRR-core	GGTCCAT	529	7	-	Nicotiana tabacum	auxin-responsive element
CP_B12g00251	ACE	CTAACGTATT	1716	9	-	Petroselinum crispum	light responsive element
CP_B12g00251	chs-Unit 1 m1	ACCTAACCCGG	1852	10	+	Zea mays	light responsive element
CP_B12g00251	TGACG-motif	TGACG	541	5	+	Hordeum vulgare	MeJA-responsiveness
CP_B12g00251	TGACG-motif	TGACG	1034	5	-	Hordeum vulgare	MeJA-responsiveness
CP_B12g00251	TGACG-motif	TGACG	1897	5	-	Hordeum vulgare	MeJA-responsiveness
CP_B12g00251	chs-CMA2a	TCACTTGA	1600	8	+	Petroselinum crispum	light responsive element
CP_B12g00251	ARE	AAACCA	869	6	+	Zea mays	anaerobic induction
CP_B12g00251	ARE	AAACCA	1188	6	-	Zea mays	anaerobic induction
CP_B12g00251	AE-box	AGAAACAA	1069	8	-	Arabidopsis thaliana	light responsive element
CP_B12g00251	AE-box	AGAAACAA	1129	8	+	Arabidopsis thaliana	light responsive element
CP_B12g00251	LTR	CCGAAA	220	6	-	Hordeum vulgare	low-temperature responsiveness
CP_B12g00251	LTR	CCGAAA	1122	6	+	Hordeum vulgare	low-temperature responsiveness
CP_B12g00461	ARE	AAACCA	139	6	+	Zea mays	anaerobic induction
CP_B12g00461	ARE	AAACCA	604	6	+	Zea mays	anaerobic induction
CP_B12g00461	TGACG-motif	TGACG	1892	5	-	Hordeum vulgare	MeJA-responsiveness
CP_B12g00461	TGA-element	AACGAC	1744	6	+	Brassica oleracea	auxin-responsive element
CP_B12g00461	ACE	CTAACGTATT	1430	9	+	Petroselinum crispum	light responsive element
CP_B12g00461	GT1-motif	GGTTAAT	1541	7	+	Avena sativa	light responsive element
CP_B12g00461	GT1-motif	GGTTAAT	1787	7	-	Avena sativa	light responsive element
CP_B12g00461	GT1-motif	GGTTAA	1788	6	-	Arabidopsis thaliana	light responsive element
CP_B12g00461	CGTCA-motif	CGTCA	1892	5	+	Hordeum vulgare	MeJA-responsiveness
CP_B12g00461	AuxRR-core	GGTCCAT	1052	7	+	Nicotiana tabacum	auxin-responsive element
CP_B12g00461	G-box	CACGTC	1080	6	+	Zea mays	light responsive element
CP_B12g00461	Box 4	ATTAAT	123	6	+	Petroselinum crispum	light responsive element
CP_B12g00461	Box 4	ATTAAT	180	6	+	Petroselinum crispum	light responsive element
CP_B12g00461	Box 4	ATTAAT	404	6	+	Petroselinum crispum	light responsive element
CP_B12g00461	Box 4	ATTAAT	1396	6	-	Petroselinum crispum	light responsive element
CP_B12g00461	Box 4	ATTAAT	1400	6	-	Petroselinum crispum	light responsive element
CP_B12g00461	Box 4	ATTAAT	1663	6	-	Petroselinum crispum	light responsive element
CP_B12g00461	MSA-like	TCCAACGGT	1087	9	-	Catharanthus roseus	cell cycle regulation
CP_B12g00461	O2-site	GTTGACGTGA	1079	9	-	Zea mays	zein metabolism regulation
CP_B12g00461	G-Box	CACGTT	1140	6	+	Pisum sativum	light responsive element
CP_B12g00461	GCN4_motif	TGAGTCA	1925	7	-	Oryza sativa	endosperm expression
CP_B12g00461	ABRE	TACGGTC	1014	7	+	Arabidopsis thaliana	abscisic acid responsiveness
CP_B12g00461	ABRE	ACGTG	1080	5	-	Arabidopsis thaliana	abscisic acid responsiveness
CP_B12g00461	ABRE	ACGTG	1140	5	-	Arabidopsis thaliana	abscisic acid responsiveness
CP_B12g01171	MBSI	TTTTTACGGTTA	1368	11	+	Petunia hybrida	flavonoid biosynthetic genes regulation
CP_B12g01171	TCT-motif	TCTTAC	1831	6	+	Arabidopsis thaliana	light responsive element
CP_B12g01171	MRE	AACCTAA	1702	7	+	Petroselinum crispum	light responsive element
CP_B12g01171	ABRE	ACGTG	24	5	+	Arabidopsis thaliana	abscisic acid responsiveness
CP_B12g01171	ABRE	ACGTG	1445	5	+	Arabidopsis thaliana	abscisic acid responsiveness
CP_B12g01171	AE-box	AGAAACTT	1717	8	-	Arabidopsis thaliana	light responsive element
CP_B12g01171	TGACG-motif	TGACG	542	5	+	Hordeum vulgare	MeJA-responsiveness
CP_B12g01171	TGACG-motif	TGACG	1309	5	-	Hordeum vulgare	MeJA-responsiveness
CP_B12g01171	TCA-element	CCATCTTTTT	1220	9	-	Nicotiana tabacum	salicylic acid responsiveness
CP_B12g01171	TCA-element	TCAGAAGAGG	1729	9	+	Brassica oleracea	salicylic acid responsiveness
CP_B12g01171	CGTCA-motif	CGTCA	542	5	-	Hordeum vulgare	MeJA-responsiveness
CP_B12g01171	CGTCA-motif	CGTCA	1309	5	+	Hordeum vulgare	MeJA-responsiveness
CP_B12g01171	GARE-motif	TCTGTTG	496	7	-	Brassica oleracea	gibberellin-responsive element
CP_B12g01171	O2-site	GATGATGTGG	192	9	+	Zea mays	zein metabolism regulation
CP_B12g01171	G-Box	CACGTT	1444	6	-	Pisum sativum	light responsive element
CP_B12g01171	Box 4	ATTAAT	257	6	+	Petroselinum crispum	light responsive element
CP_B12g01171	Box 4	ATTAAT	1192	6	-	Petroselinum crispum	light responsive element
CP_B12g01171	G-box	TACGTG	23	6	+	Arabidopsis thaliana	light responsive element
CP_B12g01534	MBS	CAACTG	1763	6	+	Arabidopsis thaliana	drought-inducibility
CP_B12g01534	GA-motif	ATAGATAA	1562	8	-	Arabidopsis thaliana	light responsive element
CP_B12g01534	G-box	CACGTG	1485	6	-	Arabidopsis thaliana	light responsive element
CP_B12g01534	G-box	CACGAC	1713	6	-	Zea mays	light responsive element
CP_B12g01534	AT1-motif	AATTATTTTTTATT	1406	13	-	Solanum tuberosum	light responsive element
CP_B12g01534	Box 4	ATTAAT	114	6	+	Petroselinum crispum	light responsive element
CP_B12g01534	Box 4	ATTAAT	738	6	+	Petroselinum crispum	light responsive element
CP_B12g01534	Box 4	ATTAAT	964	6	+	Petroselinum crispum	light responsive element
CP_B12g01534	Box 4	ATTAAT	1003	6	-	Petroselinum crispum	light responsive element
CP_B12g01534	GARE-motif	TCTGTTG	1745	7	+	Brassica oleracea	gibberellin-responsive element
CP_B12g01534	O2-site	GATGA(C/T)(A/G)TG(A/G)	1730	8	+	Zea mays	zein metabolism regulation
CP_B12g01534	AE-box	AGAAACAA	1284	8	+	Arabidopsis thaliana	light responsive element
CP_B12g01534	TGA-element	AACGAC	13	6	-	Brassica oleracea	auxin-responsive element
CP_B12g01534	GT1-motif	GGTTAA	917	6	-	Arabidopsis thaliana	light responsive element
CP_B12g01534	TCT-motif	TCTTAC	45	6	+	Arabidopsis thaliana	light responsive element
CP_B12g01534	ABRE	CACGTG	1485	6	-	Arabidopsis thaliana	abscisic acid responsiveness
CP_B12g01534	ABRE	ACGTG	1486	5	+	Arabidopsis thaliana	abscisic acid responsiveness
CP_B12g01534	HD-Zip 1	CAAT(A/T)ATTG	1337	8.5	-	Arabidopsis thaliana	palisade mesophyll cells
CP_B12g01534	TC-rich repeats	ATTCTCTAAC	1039	9	+	Nicotiana tabacum	defense and stress responsiveness
CP_B12g01534	MBSI	aaaAaaC(G/C)GTTA	684	10.5	+	Petunia hybrida	flavonoid biosynthetic genes regulation
CP_B12g01534	MBSI	TTTTTACGGTTA	867	11	-	Petunia hybrida	flavonoid biosynthetic genes regulation
CP_B12g01534	circadian	CAAAGATATC	225	9	-	Lycopersicon esculentum	circadian control
CP_B12g01534	circadian	CAAAGATATC	1666	9	+	Lycopersicon esculentum	circadian control
CP_B12g01534	TCA-element	CCATCTTTTT	24	9	-	Nicotiana tabacum	salicylic acid responsiveness
CP_B12g01534	TCA-element	CCATCTTTTT	1725	9	-	Nicotiana tabacum	salicylic acid responsiveness
CP_B12g01534	G-Box	CACGTG	1485	6	-	Pisum sativum	light responsive element
CP_B12g01534	ARE	AAACCA	657	6	-	Zea mays	anaerobic induction
CP_B12g01534	ARE	AAACCA	1122	6	-	Zea mays	anaerobic induction
CP_B12g01534	ARE	AAACCA	1503	6	-	Zea mays	anaerobic induction
CP_B12g01534	ATC-motif	TGCTATCCA	1659	9	-	Pisum sativum	light responsive element
CP_B12g01611	ARE	AAACCA	358	6	-	Zea mays	anaerobic induction
CP_B12g01611	ARE	AAACCA	1586	6	+	Zea mays	anaerobic induction
CP_B12g01611	LTR	CCGAAA	380	6	-	Hordeum vulgare	low-temperature responsiveness
CP_B12g01611	LTR	CCGAAA	1820	6	-	Hordeum vulgare	low-temperature responsiveness
CP_B12g01611	TGA-element	AACGAC	457	6	+	Brassica oleracea	auxin-responsive element
CP_B12g01611	TGACG-motif	TGACG	585	5	-	Hordeum vulgare	MeJA-responsiveness
CP_B12g01611	TGACG-motif	TGACG	775	5	-	Hordeum vulgare	MeJA-responsiveness
CP_B12g01611	GC-motif	CCCCCG	904	6	+	Zea mays	anaerobic induction
CP_B12g01611	CGTCA-motif	CGTCA	585	5	+	Hordeum vulgare	MeJA-responsiveness
CP_B12g01611	CGTCA-motif	CGTCA	775	5	+	Hordeum vulgare	MeJA-responsiveness
CP_B12g01611	G-Box	CACGTG	915	6	+	Pisum sativum	light responsive element
CP_B12g01611	O2-site	GATGACATGG	1736	9	+	Zea mays	zein metabolism regulation
CP_B12g01611	G-box	CACGTG	915	6	+	Arabidopsis thaliana	light responsive element
CP_B12g01611	MBS	CAACTG	267	6	+	Arabidopsis thaliana	drought-inducibility
CP_B12g01611	ABRE	CACGTG	915	6	+	Arabidopsis thaliana	abscisic acid responsiveness
CP_B12g01611	ABRE	ACGTG	916	5	+	Arabidopsis thaliana	abscisic acid responsiveness
CP_B13g00039	P-box	CCTTTTG	1784	7	+	Oryza sativa	gibberellin-responsive element
CP_B13g00039	ABRE	ACGTG	13	5	+	Arabidopsis thaliana	abscisic acid responsiveness
CP_B13g00039	ABRE	ACGTG	1202	5	-	Arabidopsis thaliana	abscisic acid responsiveness
CP_B13g00039	ABRE	CACGTG	1499	6	-	Arabidopsis thaliana	abscisic acid responsiveness
CP_B13g00039	ABRE	ACGTG	1500	5	+	Arabidopsis thaliana	abscisic acid responsiveness
CP_B13g00039	ABRE	ACGTG	1689	5	+	Arabidopsis thaliana	abscisic acid responsiveness
CP_B13g00039	ABRE	ACGTG	1728	5	-	Arabidopsis thaliana	abscisic acid responsiveness
CP_B13g00039	TCCC-motif	TCTCCCT	1513	7	-	Spinacia oleracea	light responsive element
CP_B13g00039	HD-Zip 1	CAAT(A/T)ATTG	1242	8.5	-	Arabidopsis thaliana	palisade mesophyll cells
CP_B13g00039	LTR	CCGAAA	67	6	+	Hordeum vulgare	low-temperature responsiveness
CP_B13g00039	Sp1	GGGCGG	1162	6	-	Oryza sativa	light responsive element
CP_B13g00039	ARE	AAACCA	349	6	-	Zea mays	anaerobic induction
CP_B13g00039	ARE	AAACCA	833	6	+	Zea mays	anaerobic induction
CP_B13g00039	ARE	AAACCA	1004	6	-	Zea mays	anaerobic induction
CP_B13g00039	chs-CMA2a	TCACTTGA	1682	8	+	Petroselinum crispum	light responsive element
CP_B13g00039	TGACG-motif	TGACG	1687	5	+	Hordeum vulgare	MeJA-responsiveness
CP_B13g00039	GT1-motif	GGTTAAT	190	7	-	Avena sativa	light responsive element
CP_B13g00039	GT1-motif	GGTTAA	191	6	-	Arabidopsis thaliana	light responsive element
CP_B13g00039	CGTCA-motif	CGTCA	1687	5	-	Hordeum vulgare	MeJA-responsiveness
CP_B13g00039	ATCT-motif	AATCTAATCC	717	9	+	Pisum sativum	light responsive element
CP_B13g00039	G-box	GCCACGTGGA	1497	9	+	Arabidopsis thaliana	light responsive element
CP_B13g00039	G-box	CACGTG	1499	6	-	Arabidopsis thaliana	light responsive element
CP_B13g00039	G-box	CACGTC	1688	6	-	Zea mays	light responsive element
CP_B13g00039	G-box	TACGTG	1728	6	-	Arabidopsis thaliana	light responsive element
CP_B13g00039	G-Box	CACGTT	12	6	-	Pisum sativum	light responsive element
CP_B13g00039	G-Box	CACGTT	1202	6	+	Pisum sativum	light responsive element
CP_B13g00039	G-Box	CACGTG	1499	6	-	Pisum sativum	light responsive element
CP_B13g00039	GCN4_motif	TGAGTCA	1678	7	-	Oryza sativa	endosperm expression
CP_B13g00039	Box 4	ATTAAT	333	6	+	Petroselinum crispum	light responsive element
CP_B13g00039	Box 4	ATTAAT	714	6	+	Petroselinum crispum	light responsive element
CP_B13g00039	Box 4	ATTAAT	766	6	+	Petroselinum crispum	light responsive element
CP_B13g00039	Box 4	ATTAAT	817	6	+	Petroselinum crispum	light responsive element
CP_B13g00039	Box 4	ATTAAT	1368	6	-	Petroselinum crispum	light responsive element
CP_B13g00551	TC-rich repeats	GTTTTCTTAC	1838	9	+	Nicotiana tabacum	defense and stress responsiveness
CP_B13g00551	ABRE	ACGTG	621	5	-	Arabidopsis thaliana	abscisic acid responsiveness
CP_B13g00551	ABRE	ACGTG	1368	5	+	Arabidopsis thaliana	abscisic acid responsiveness
CP_B13g00551	TCCC-motif	TCTCCCT	1114	7	-	Spinacia oleracea	light responsive element
CP_B13g00551	ARE	AAACCA	40	6	+	Zea mays	anaerobic induction
CP_B13g00551	ARE	AAACCA	663	6	+	Zea mays	anaerobic induction
CP_B13g00551	ARE	AAACCA	1192	6	-	Zea mays	anaerobic induction
CP_B13g00551	TGACG-motif	TGACG	623	5	-	Hordeum vulgare	MeJA-responsiveness
CP_B13g00551	CGTCA-motif	CGTCA	623	5	+	Hordeum vulgare	MeJA-responsiveness
CP_B13g00551	ATCT-motif	AATCTAATCC	158	10	-	Pisum sativum	light responsive element
CP_B13g00551	ATCT-motif	AATCTAATCC	683	9	+	Pisum sativum	light responsive element
CP_B13g00551	AuxRR-core	GGTCCAT	215	7	+	Nicotiana tabacum	auxin-responsive element
CP_B13g00551	AuxRR-core	GGTCCAT	1782	7	+	Nicotiana tabacum	auxin-responsive element
CP_B13g00551	TCA-element	CCATCTTTTT	1614	9	+	Nicotiana tabacum	salicylic acid responsiveness
CP_B13g00551	TCA-element	CCATCTTTTT	1846	9	+	Nicotiana tabacum	salicylic acid responsiveness
CP_B13g00551	G-box	CACGTC	621	6	+	Zea mays	light responsive element
CP_B13g00551	G-box	TACGTG	1367	6	+	Arabidopsis thaliana	light responsive element
CP_B13g00551	Box 4	ATTAAT	470	6	+	Petroselinum crispum	light responsive element
CP_B13g00551	Box 4	ATTAAT	1480	6	-	Petroselinum crispum	light responsive element
CP_B13g00551	Box 4	ATTAAT	1487	6	-	Petroselinum crispum	light responsive element
CP_B13g00551	GCN4_motif	TGAGTCA	1053	7	+	Oryza sativa	endosperm expression
CP_B13g01720	CGTCA-motif	CGTCA	990	5	-	Hordeum vulgare	MeJA-responsiveness
CP_B13g01720	Box 4	ATTAAT	418	6	+	Petroselinum crispum	light responsive element
CP_B13g01720	O2-site	GATGATGTGG	714	9	+	Zea mays	zein metabolism regulation
CP_B13g01720	O2-site	GATGATGTGG	820	9	+	Zea mays	zein metabolism regulation
CP_B13g01720	G-box	CACGTC	1323	6	+	Zea mays	light responsive element
CP_B13g01720	G-box	TAACACGTAG	1347	9	-	Brassica oleracea	light responsive element
CP_B13g01720	G-box	TACGTG	1348	6	+	Arabidopsis thaliana	light responsive element
CP_B13g01720	CAT-box	GCCACT	882	6	-	Arabidopsis thaliana	meristem expression
CP_B13g01720	Sp1	GGGCGG	1619	6	-	Oryza sativa	light responsive element
CP_B13g01720	GT1-motif	GGTTAA	1449	6	-	Arabidopsis thaliana	light responsive element
CP_B13g01720	TGA-element	AACGAC	1426	6	+	Brassica oleracea	auxin-responsive element
CP_B13g01720	GATA-motif	GATAGGG	1398	7	+	Pisum sativum	light responsive element
CP_B13g01720	MBS	CAACTG	1112	6	+	Arabidopsis thaliana	drought-inducibility
CP_B13g01720	MBS	CAACTG	1552	6	-	Arabidopsis thaliana	drought-inducibility
CP_B13g01720	GTGGC-motif	GATTCTGTGGC	877	10	+	Spinacia oleracea	light responsive element
CP_B13g01720	G-Box	CACGTT	953	6	-	Pisum sativum	light responsive element
CP_B13g01720	ARE	AAACCA	164	6	-	Zea mays	anaerobic induction
CP_B13g01720	ARE	AAACCA	562	6	-	Zea mays	anaerobic induction
CP_B13g01720	ARE	AAACCA	669	6	+	Zea mays	anaerobic induction
CP_B13g01720	ARE	AAACCA	1815	6	-	Zea mays	anaerobic induction
CP_B13g01720	TGACG-motif	TGACG	990	5	+	Hordeum vulgare	MeJA-responsiveness
CP_B13g01720	AACA_motif	TAACAAACTCCA	591	11	-	Oryza sativa	endosperm expression
CP_B13g01720	TCT-motif	TCTTAC	938	6	-	Arabidopsis thaliana	light responsive element
CP_B13g01720	ABRE	ACGTG	954	5	+	Arabidopsis thaliana	abscisic acid responsiveness
CP_B13g01720	ABRE	ACGTG	1323	5	-	Arabidopsis thaliana	abscisic acid responsiveness
CP_B13g01720	ABRE	GCAACGTGTC	1346	9	+	Hordeum vulgare	abscisic acid responsiveness
CP_B13g01720	ABRE	TACGTGTC	1348	8	+	Oryza sativa	abscisic acid responsiveness
CP_B13g01720	ABRE	ACGTG	1349	5	+	Arabidopsis thaliana	abscisic acid responsiveness
CP_B14g01310	GARE-motif	TCTGTTG	1035	7	+	Brassica oleracea	gibberellin-responsive element
CP_B14g01310	O2-site	GATGATGTGG	1567	9	+	Zea mays	zein metabolism regulation
CP_B14g01310	Box 4	ATTAAT	141	6	+	Petroselinum crispum	light responsive element
CP_B14g01310	Box 4	ATTAAT	176	6	+	Petroselinum crispum	light responsive element
CP_B14g01310	Box 4	ATTAAT	1659	6	-	Petroselinum crispum	light responsive element
CP_B14g01310	CGTCA-motif	CGTCA	707	5	+	Hordeum vulgare	MeJA-responsiveness
CP_B14g01310	CGTCA-motif	CGTCA	892	5	+	Hordeum vulgare	MeJA-responsiveness
CP_B14g01310	CGTCA-motif	CGTCA	911	5	+	Hordeum vulgare	MeJA-responsiveness
CP_B14g01310	CGTCA-motif	CGTCA	921	5	+	Hordeum vulgare	MeJA-responsiveness
CP_B14g01310	CGTCA-motif	CGTCA	1003	5	+	Hordeum vulgare	MeJA-responsiveness
CP_B14g01310	TCA-element	CCATCTTTTT	1125	9	-	Nicotiana tabacum	salicylic acid responsiveness
CP_B14g01310	TGACG-motif	TGACG	707	5	-	Hordeum vulgare	MeJA-responsiveness
CP_B14g01310	TGACG-motif	TGACG	892	5	-	Hordeum vulgare	MeJA-responsiveness
CP_B14g01310	TGACG-motif	TGACG	911	5	-	Hordeum vulgare	MeJA-responsiveness
CP_B14g01310	TGACG-motif	TGACG	921	5	-	Hordeum vulgare	MeJA-responsiveness
CP_B14g01310	TGACG-motif	TGACG	1003	5	-	Hordeum vulgare	MeJA-responsiveness
CP_B14g01310	chs-CMA1a	TTACTTAA	114	8	-	Daucus carota	light responsive element
CP_B14g01310	ARE	AAACCA	797	6	+	Zea mays	anaerobic induction
CP_B14g01310	ARE	AAACCA	1333	6	-	Zea mays	anaerobic induction
CP_B14g01310	ARE	AAACCA	1979	6	-	Zea mays	anaerobic induction
CP_B14g01310	ABRE	AACCCGG	1231	7	-	Arabidopsis thaliana	abscisic acid responsiveness
CP_B14g01310	GTGGC-motif	GATTCTGTGGC	1026	10	-	Spinacia oleracea	light responsive element
CP_B14g01310	TCCC-motif	TCTCCCT	859	7	+	Spinacia oleracea	light responsive element
CP_B14g01310	TCT-motif	TCTTAC	118	6	-	Arabidopsis thaliana	light responsive element
CP_B15g00697	GATA-motif	GATAGGG	1980	7	-	Pisum sativum	light responsive element
CP_B15g00697	ABRE	ACGTG	10	5	+	Arabidopsis thaliana	abscisic acid responsiveness
CP_B15g00697	ABRE	ACGTG	1675	5	+	Arabidopsis thaliana	abscisic acid responsiveness
CP_B15g00697	MBS	CAACTG	1263	6	+	Arabidopsis thaliana	drought-inducibility
CP_B15g00697	MBS	CAACTG	1973	6	+	Arabidopsis thaliana	drought-inducibility
CP_B15g00697	TC-rich repeats	GTTTTCTTAC	133	9	-	Nicotiana tabacum	defense and stress responsiveness
CP_B15g00697	I-box	cCATATCCAAT	79	10	-	Flaveria trinervia	light responsive element
CP_B15g00697	I-box	AAGATAAGGCT	1833	10	-	Gossypium hirsutum	light responsive element
CP_B15g00697	CGTCA-motif	CGTCA	491	5	-	Hordeum vulgare	MeJA-responsiveness
CP_B15g00697	CGTCA-motif	CGTCA	1289	5	+	Hordeum vulgare	MeJA-responsiveness
CP_B15g00697	CGTCA-motif	CGTCA	1841	5	+	Hordeum vulgare	MeJA-responsiveness
CP_B15g00697	circadian	CAAAGATATC	115	9	-	Lycopersicon esculentum	circadian control
CP_B15g00697	G-box	TACGTG	9	6	+	Arabidopsis thaliana	light responsive element
CP_B15g00697	Box 4	ATTAAT	459	6	+	Petroselinum crispum	light responsive element
CP_B15g00697	Box 4	ATTAAT	931	6	+	Petroselinum crispum	light responsive element
CP_B15g00697	Box 4	ATTAAT	1246	6	-	Petroselinum crispum	light responsive element
CP_B15g00697	Box 4	ATTAAT	1529	6	-	Petroselinum crispum	light responsive element
CP_B15g00697	Box 4	ATTAAT	1926	6	-	Petroselinum crispum	light responsive element
CP_B15g00697	G-Box	CACGTT	1674	6	-	Pisum sativum	light responsive element
CP_B15g00697	ARE	AAACCA	139	6	+	Zea mays	anaerobic induction
CP_B15g00697	ARE	AAACCA	845	6	+	Zea mays	anaerobic induction
CP_B15g00697	ARE	AAACCA	903	6	+	Zea mays	anaerobic induction
CP_B15g00697	TGACG-motif	TGACG	491	5	+	Hordeum vulgare	MeJA-responsiveness
CP_B15g00697	TGACG-motif	TGACG	1289	5	-	Hordeum vulgare	MeJA-responsiveness
CP_B15g00697	TGACG-motif	TGACG	1841	5	-	Hordeum vulgare	MeJA-responsiveness
CP_B15g00698	TCT-motif	TCTTAC	1963	6	+	Arabidopsis thaliana	light responsive element
CP_B15g00698	MBSI	aaaAaaC(G/C)GTTA	837	10.5	+	Petunia hybrida	flavonoid biosynthetic genes regulation
CP_B15g00698	AAAC-motif	CAATCAAAACCT	1269	11	-	Spinacia oleracea	light responsive element
CP_B15g00698	CGTCA-motif	CGTCA	1546	5	+	Hordeum vulgare	MeJA-responsiveness
CP_B15g00698	circadian	CAAAGATATC	39	9	+	Lycopersicon esculentum	circadian control
CP_B15g00698	GA-motif	ATAGATAA	817	8	+	Arabidopsis thaliana	light responsive element
CP_B15g00698	CAT-box	GCCACT	1461	6	+	Arabidopsis thaliana	meristem expression
CP_B15g00698	Gap-box	CAAATGAA(A/G)A	353	9	-	Arabidopsis thaliana	light responsive element
CP_B15g00698	Box 4	ATTAAT	135	6	+	Petroselinum crispum	light responsive element
CP_B15g00698	Box 4	ATTAAT	1287	6	-	Petroselinum crispum	light responsive element
CP_B15g00698	Box 4	ATTAAT	1655	6	-	Petroselinum crispum	light responsive element
CP_B15g00698	Box 4	ATTAAT	1819	6	-	Petroselinum crispum	light responsive element
CP_B15g00698	GARE-motif	TCTGTTG	315	7	+	Brassica oleracea	gibberellin-responsive element
CP_B15g00698	GARE-motif	TCTGTTG	1485	7	-	Brassica oleracea	gibberellin-responsive element
CP_B15g00698	AE-box	AGAAACAA	1709	8	+	Arabidopsis thaliana	light responsive element
CP_B15g00698	LTR	CCGAAA	535	6	+	Hordeum vulgare	low-temperature responsiveness
CP_B15g00698	ARE	AAACCA	664	6	-	Zea mays	anaerobic induction
CP_B15g00698	ARE	AAACCA	678	6	-	Zea mays	anaerobic induction
CP_B15g00698	ARE	AAACCA	937	6	-	Zea mays	anaerobic induction
CP_B15g00698	ARE	AAACCA	1269	6	-	Zea mays	anaerobic induction
CP_B15g00698	ARE	AAACCA	1776	6	+	Zea mays	anaerobic induction
CP_B15g00698	TGA-element	AACGAC	1447	6	+	Brassica oleracea	auxin-responsive element
CP_B15g00698	TGACG-motif	TGACG	1546	5	-	Hordeum vulgare	MeJA-responsiveness
CP_B15g00702	GT1-motif	GGTTAAT	1834	7	-	Avena sativa	light responsive element
CP_B15g00702	GT1-motif	GGTTAA	1835	6	-	Arabidopsis thaliana	light responsive element
CP_B15g00702	TGA-element	AACGAC	583	6	+	Brassica oleracea	auxin-responsive element
CP_B15g00702	TGA-element	AACGAC	593	6	-	Brassica oleracea	auxin-responsive element
CP_B15g00702	TGACG-motif	TGACG	353	5	-	Hordeum vulgare	MeJA-responsiveness
CP_B15g00702	TGACG-motif	TGACG	373	5	+	Hordeum vulgare	MeJA-responsiveness
CP_B15g00702	TGACG-motif	TGACG	1840	5	-	Hordeum vulgare	MeJA-responsiveness
CP_B15g00702	ARE	AAACCA	393	6	+	Zea mays	anaerobic induction
CP_B15g00702	ARE	AAACCA	1323	6	-	Zea mays	anaerobic induction
CP_B15g00702	ARE	AAACCA	1519	6	-	Zea mays	anaerobic induction
CP_B15g00702	Sp1	GGGCGG	96	6	+	Oryza sativa	light responsive element
CP_B15g00702	Sp1	GGGCGG	367	6	+	Oryza sativa	light responsive element
CP_B15g00702	AE-box	AGAAACAA	1356	8	-	Arabidopsis thaliana	light responsive element
CP_B15g00702	Box 4	ATTAAT	978	6	+	Petroselinum crispum	light responsive element
CP_B15g00702	MSA-like	TCCAACGGT	618	9	+	Catharanthus roseus	cell cycle regulation
CP_B15g00702	G-Box	CACGTT	1143	6	+	Pisum sativum	light responsive element
CP_B15g00702	G-box	TACGTG	444	6	-	Arabidopsis thaliana	light responsive element
CP_B15g00702	G-box	CACGTC	462	6	+	Zea mays	light responsive element
CP_B15g00702	CGTCA-motif	CGTCA	353	5	+	Hordeum vulgare	MeJA-responsiveness
CP_B15g00702	CGTCA-motif	CGTCA	373	5	-	Hordeum vulgare	MeJA-responsiveness
CP_B15g00702	CGTCA-motif	CGTCA	1840	5	+	Hordeum vulgare	MeJA-responsiveness
CP_B15g00702	AuxRR-core	GGTCCAT	607	7	+	Nicotiana tabacum	auxin-responsive element
CP_B15g00702	AuxRR-core	GGTCCAT	658	7	-	Nicotiana tabacum	auxin-responsive element
CP_B15g00702	AuxRR-core	GGTCCAT	1724	7	-	Nicotiana tabacum	auxin-responsive element
CP_B15g00702	ABRE	ACGTG	444	5	-	Arabidopsis thaliana	abscisic acid responsiveness
CP_B15g00702	ABRE	ACGTG	462	5	-	Arabidopsis thaliana	abscisic acid responsiveness
CP_B15g00702	ABRE	ACGTG	1143	5	-	Arabidopsis thaliana	abscisic acid responsiveness
CP_B15g00702	GATA-motif	GATAGGG	252	7	+	Pisum sativum	light responsive element
CP_B15g00702	P-box	CCTTTTG	1158	7	+	Oryza sativa	gibberellin-responsive element
CP_B15g00702	MRE	AACCTAA	311	7	-	Petroselinum crispum	light responsive element
CP_B15g00703	AE-box	AGAAACTT	1543	8	-	Arabidopsis thaliana	light responsive element
CP_B15g00703	ARE	AAACCA	674	6	-	Zea mays	anaerobic induction
CP_B15g00703	ARE	AAACCA	1634	6	-	Zea mays	anaerobic induction
CP_B15g00703	GT1-motif	GGTTAAT	154	7	+	Avena sativa	light responsive element
CP_B15g00703	G-box	CACGAC	1194	6	-	Zea mays	light responsive element
CP_B15g00703	TATC-box	TATCCCA	322	7	-	Oryza sativa	gibberellin-responsive element
CP_B15g00703	Box 4	ATTAAT	134	6	+	Petroselinum crispum	light responsive element
CP_B15g00703	Box 4	ATTAAT	569	6	+	Petroselinum crispum	light responsive element
CP_B15g00703	O2-site	GATGATGTGG	1240	9	+	Zea mays	zein metabolism regulation
CP_B15g00703	O2-site	GATGATGTGG	1280	9	+	Zea mays	zein metabolism regulation
CP_B15g00703	TCT-motif	TCTTAC	1664	6	-	Arabidopsis thaliana	light responsive element
CP_B15g00703	TCT-motif	TCTTAC	1940	6	-	Arabidopsis thaliana	light responsive element
CP_B15g00703	GATA-motif	AAGATAAGATT	1808	10	+	Arabidopsis thaliana	light responsive element
CP_B15g00703	HD-Zip 1	CAAT(A/T)ATTG	811	8.5	+	Arabidopsis thaliana	palisade mesophyll cells
CP_B15g00859	ARE	AAACCA	389	6	+	Zea mays	anaerobic induction
CP_B15g00859	ARE	AAACCA	681	6	+	Zea mays	anaerobic induction
CP_B15g00859	ARE	AAACCA	1521	6	+	Zea mays	anaerobic induction
CP_B15g00859	Sp1	GGGCGG	1840	6	-	Oryza sativa	light responsive element
CP_B15g00859	LTR	CCGAAA	1105	6	+	Hordeum vulgare	low-temperature responsiveness
CP_B15g00859	chs-CMA1a	TTACTTAA	747	8	+	Daucus carota	light responsive element
CP_B15g00859	TGACG-motif	TGACG	1372	5	+	Hordeum vulgare	MeJA-responsiveness
CP_B15g00859	TGACG-motif	TGACG	1859	5	+	Hordeum vulgare	MeJA-responsiveness
CP_B15g00859	TCA-element	TCAGAAGAGG	1003	9	+	Brassica oleracea	salicylic acid responsiveness
CP_B15g00859	TCA-element	CCATCTTTTT	1428	9	-	Nicotiana tabacum	salicylic acid responsiveness
CP_B15g00859	I-box	gGATAAGGTG	1031	9	+	Zea mays	light responsive element
CP_B15g00859	CGTCA-motif	CGTCA	1372	5	-	Hordeum vulgare	MeJA-responsiveness
CP_B15g00859	CGTCA-motif	CGTCA	1859	5	-	Hordeum vulgare	MeJA-responsiveness
CP_B15g00859	Box 4	ATTAAT	175	6	+	Petroselinum crispum	light responsive element
CP_B15g00859	Box 4	ATTAAT	703	6	+	Petroselinum crispum	light responsive element
CP_B15g00859	Box 4	ATTAAT	799	6	+	Petroselinum crispum	light responsive element
CP_B15g00859	GCN4_motif	TGAGTCA	1586	7	+	Oryza sativa	endosperm expression
CP_B15g00859	O2-site	GATGATGTGG	946	9	+	Zea mays	zein metabolism regulation
CP_B15g00859	G-box	CACGTC	1860	6	-	Zea mays	light responsive element
CP_B15g00859	P-box	CCTTTTG	1655	7	-	Oryza sativa	gibberellin-responsive element
CP_B15g00859	MBS	CAACTG	568	6	-	Arabidopsis thaliana	drought-inducibility
CP_B15g00859	GTGGC-motif	GATTCTGTGGC	1596	10	+	Spinacia oleracea	light responsive element
CP_B15g00859	ABRE	ACGTG	1861	5	+	Arabidopsis thaliana	abscisic acid responsiveness
CP_B17g00516	G-box	CACGTC	1806	6	-	Zea mays	light responsive element
CP_B17g00516	O2-site	GATGA(C/T)(A/G)TG(A/G)	1002	8	-	Zea mays	zein metabolism regulation
CP_B17g00516	Box 4	ATTAAT	87	6	+	Petroselinum crispum	light responsive element
CP_B17g00516	Box 4	ATTAAT	250	6	+	Petroselinum crispum	light responsive element
CP_B17g00516	Box 4	ATTAAT	442	6	+	Petroselinum crispum	light responsive element
CP_B17g00516	Box 4	ATTAAT	609	6	+	Petroselinum crispum	light responsive element
CP_B17g00516	Box 4	ATTAAT	688	6	+	Petroselinum crispum	light responsive element
CP_B17g00516	Box 4	ATTAAT	1319	6	-	Petroselinum crispum	light responsive element
CP_B17g00516	TGA-element	AACGAC	1055	6	+	Brassica oleracea	auxin-responsive element
CP_B17g00516	chs-CMA1a	TTACTTAA	316	8	+	Daucus carota	light responsive element
CP_B17g00516	ARE	AAACCA	413	6	-	Zea mays	anaerobic induction
CP_B17g00516	ARE	AAACCA	456	6	-	Zea mays	anaerobic induction
CP_B17g00516	ARE	AAACCA	941	6	-	Zea mays	anaerobic induction
CP_B17g00516	ABRE	GACACGTGGC	927	9	+	Triticum aestivum	abscisic acid responsiveness
CP_B17g00516	ABRE	ACGTG	1807	5	+	Arabidopsis thaliana	abscisic acid responsiveness
CP_B17g00516	GTGGC-motif	GATTCTGTGGC	1848	10	+	Spinacia oleracea	light responsive element
CP_B17g00516	MBS	CAACTG	493	6	+	Arabidopsis thaliana	drought-inducibility
CP_B17g00516	MBS	CAACTG	896	6	-	Arabidopsis thaliana	drought-inducibility
CP_B17g00516	GATA-motif	AAGATAAGATT	1160	10	+	Arabidopsis thaliana	light responsive element
CP_B17g00516	GATA-motif	AAGATAAGATT	1884	10	-	Arabidopsis thaliana	light responsive element
CP_B17g00516	TCT-motif	TCTTAC	1294	6	+	Arabidopsis thaliana	light responsive element
CP_B17g00516	TC-rich repeats	GTTTTCTTAC	1290	10	+	Nicotiana tabacum	defense and stress responsiveness
CP_B17g00759	MRE	AACCTAA	42	7	-	Petroselinum crispum	light responsive element
CP_B17g00759	MRE	AACCTAA	78	7	-	Petroselinum crispum	light responsive element
CP_B17g00759	MBS	CAACTG	753	6	+	Arabidopsis thaliana	drought-inducibility
CP_B17g00759	ATCT-motif	AATCTAATCC	1226	9	+	Pisum sativum	light responsive element
CP_B17g00759	CGTCA-motif	CGTCA	1580	5	+	Hordeum vulgare	MeJA-responsiveness
CP_B17g00759	CGTCA-motif	CGTCA	1875	5	+	Hordeum vulgare	MeJA-responsiveness
CP_B17g00759	GC-motif	CCCCCG	272	6	-	Zea mays	anaerobic induction
CP_B17g00759	GC-motif	CCCCCG	412	6	-	Zea mays	anaerobic induction
CP_B17g00759	G-box	CACGAC	1778	6	+	Zea mays	light responsive element
CP_B17g00759	TATC-box	TATCCCA	203	7	-	Oryza sativa	gibberellin-responsive element
CP_B17g00759	Box 4	ATTAAT	1064	6	-	Petroselinum crispum	light responsive element
CP_B17g00759	Box 4	ATTAAT	1352	6	-	Petroselinum crispum	light responsive element
CP_B17g00759	ARE	AAACCA	1591	6	-	Zea mays	anaerobic induction
CP_B17g00759	TGACG-motif	TGACG	1580	5	-	Hordeum vulgare	MeJA-responsiveness
CP_B17g00759	TGACG-motif	TGACG	1875	5	-	Hordeum vulgare	MeJA-responsiveness
CP_B17g00759	ACE	CTAACGTATT	1094	9	+	Petroselinum crispum	light responsive element
CP_B17g00759	GT1-motif	GGTTAA	126	6	+	Arabidopsis thaliana	light responsive element
CP_B17g00759	GT1-motif	GGTTAA	249	6	+	Arabidopsis thaliana	light responsive element
CP_B17g00759	GT1-motif	GGTTAA	619	6	-	Arabidopsis thaliana	light responsive element
CP_B17g00759	GT1-motif	GGTTAAT	1205	7	+	Avena sativa	light responsive element
CP_B17g00759	GT1-motif	GGTTAAT	1476	7	-	Avena sativa	light responsive element
CP_B17g00759	GT1-motif	GGTTAA	1477	6	-	Arabidopsis thaliana	light responsive element
CP_B17g02220	G-box	TACGTG	364	6	+	Arabidopsis thaliana	light responsive element
CP_B17g02220	Box 4	ATTAAT	1559	6	-	Petroselinum crispum	light responsive element
CP_B17g02220	O2-site	GATGATGTGG	803	9	+	Zea mays	zein metabolism regulation
CP_B17g02220	O2-site	GATGATGTGG	1456	10	+	Zea mays	zein metabolism regulation
CP_B17g02220	GCN4_motif	TGAGTCA	1086	7	+	Oryza sativa	endosperm expression
CP_B17g02220	CGTCA-motif	CGTCA	604	5	-	Hordeum vulgare	MeJA-responsiveness
CP_B17g02220	CGTCA-motif	CGTCA	607	5	+	Hordeum vulgare	MeJA-responsiveness
CP_B17g02220	I-box	gGATAAGGTG	1003	9	+	Zea mays	light responsive element
CP_B17g02220	TCA-element	TCAGAAGAGG	1017	9	+	Brassica oleracea	salicylic acid responsiveness
CP_B17g02220	TCA-element	TCAGAAGAGG	1155	9	+	Brassica oleracea	salicylic acid responsiveness
CP_B17g02220	GA-motif	ATAGATAA	221	8	-	Arabidopsis thaliana	light responsive element
CP_B17g02220	circadian	CAAAGATATC	1883	9	+	Lycopersicon esculentum	circadian control
CP_B17g02220	TGACG-motif	TGACG	604	5	+	Hordeum vulgare	MeJA-responsiveness
CP_B17g02220	TGACG-motif	TGACG	607	5	-	Hordeum vulgare	MeJA-responsiveness
CP_B17g02220	chs-CMA2c	ATATACGTGAAGG	956	12	+	Daucus carota	light responsive element
CP_B17g02220	chs-CMA2a	TCACTTGA	74	8	+	Petroselinum crispum	light responsive element
CP_B17g02220	ARE	AAACCA	677	6	+	Zea mays	anaerobic induction
CP_B17g02220	ARE	AAACCA	733	6	+	Zea mays	anaerobic induction
CP_B17g02220	ARE	AAACCA	1150	6	-	Zea mays	anaerobic induction
CP_B17g02220	ABRE	ACGTG	365	5	+	Arabidopsis thaliana	abscisic acid responsiveness
CP_B17g02220	ABRE	AACCCGG	1525	7	-	Arabidopsis thaliana	abscisic acid responsiveness
CP_B17g02220	TCCC-motif	TCTCCCT	1001	7	-	Spinacia oleracea	light responsive element
CP_B17g02220	TCCC-motif	TCTCCCT	1072	7	-	Spinacia oleracea	light responsive element
CP_B17g02220	TC-rich repeats	GTTTTCTTAC	1529	9	+	Nicotiana tabacum	defense and stress responsiveness
CP_B17g02220	TC-rich repeats	ATTCTCTAAC	1859	9	+	Nicotiana tabacum	defense and stress responsiveness
CP_B17g02638	TCT-motif	TCTTAC	163	6	+	Arabidopsis thaliana	light responsive element
CP_B17g02638	TCT-motif	TCTTAC	942	6	-	Arabidopsis thaliana	light responsive element
CP_B17g02638	TCT-motif	TCTTAC	1138	6	-	Arabidopsis thaliana	light responsive element
CP_B17g02638	MBS	CAACTG	88	6	+	Arabidopsis thaliana	drought-inducibility
CP_B17g02638	TCCC-motif	TCTCCCT	1255	7	+	Spinacia oleracea	light responsive element
CP_B17g02638	TCCC-motif	TCTCCCT	1569	7	-	Spinacia oleracea	light responsive element
CP_B17g02638	ABRE	CACGTG	766	6	+	Arabidopsis thaliana	abscisic acid responsiveness
CP_B17g02638	ABRE	ACGTG	767	5	+	Arabidopsis thaliana	abscisic acid responsiveness
CP_B17g02638	ABRE	ACGTG	960	5	+	Arabidopsis thaliana	abscisic acid responsiveness
CP_B17g02638	ABRE	CACGTG	1615	6	-	Arabidopsis thaliana	abscisic acid responsiveness
CP_B17g02638	ABRE	ACGTG	1616	5	+	Arabidopsis thaliana	abscisic acid responsiveness
CP_B17g02638	TC-rich repeats	GTTTTCTTAC	964	9	+	Nicotiana tabacum	defense and stress responsiveness
CP_B17g02638	CGTCA-motif	CGTCA	958	5	-	Hordeum vulgare	MeJA-responsiveness
CP_B17g02638	CGTCA-motif	CGTCA	1480	5	-	Hordeum vulgare	MeJA-responsiveness
CP_B17g02638	CGTCA-motif	CGTCA	1538	5	+	Hordeum vulgare	MeJA-responsiveness
CP_B17g02638	Box 4	ATTAAT	399	6	+	Petroselinum crispum	light responsive element
CP_B17g02638	Box 4	ATTAAT	574	6	+	Petroselinum crispum	light responsive element
CP_B17g02638	Box 4	ATTAAT	612	6	+	Petroselinum crispum	light responsive element
CP_B17g02638	Box 4	ATTAAT	1270	6	-	Petroselinum crispum	light responsive element
CP_B17g02638	Box 4	ATTAAT	1924	6	-	Petroselinum crispum	light responsive element
CP_B17g02638	Box 4	ATTAAT	1937	6	-	Petroselinum crispum	light responsive element
CP_B17g02638	G-Box	CACGTG	766	6	+	Pisum sativum	light responsive element
CP_B17g02638	G-Box	CACGTG	1615	6	-	Pisum sativum	light responsive element
CP_B17g02638	G-box	GCCACGTGGA	764	9	+	Arabidopsis thaliana	light responsive element
CP_B17g02638	G-box	CACGTG	766	6	+	Arabidopsis thaliana	light responsive element
CP_B17g02638	G-box	CACGTC	959	6	-	Zea mays	light responsive element
CP_B17g02638	G-box	CACGTG	1615	6	-	Arabidopsis thaliana	light responsive element
CP_B17g02638	ARE	AAACCA	1890	6	-	Zea mays	anaerobic induction
CP_B17g02638	AE-box	AGAAACAA	1306	8	+	Arabidopsis thaliana	light responsive element
CP_B17g02638	chs-CMA1a	TTACTTAA	165	8	+	Daucus carota	light responsive element
CP_B17g02638	DRE	TACCGACAT	1639	9	-	Arabidopsis thaliana	dehydration, low-temp, salt stresses_x000D_
CP_B18g01158	TC-rich repeats	GTTTTCTTAC	1765	9	+	Nicotiana tabacum	defense and stress responsiveness
CP_B18g01158	ATCT-motif	AATCTAATCC	413	9	-	Pisum sativum	light responsive element
CP_B18g01158	circadian	CAAAGATATC	1089	9	+	Lycopersicon esculentum	circadian control
CP_B18g01158	circadian	CAAAGATATC	1832	9	-	Lycopersicon esculentum	circadian control
CP_B18g01158	GC-motif	CCCCCG	965	6	-	Zea mays	anaerobic induction
CP_B18g01158	Box 4	ATTAAT	599	6	+	Petroselinum crispum	light responsive element
CP_B18g01158	Box 4	ATTAAT	1337	6	-	Petroselinum crispum	light responsive element
CP_B18g01158	Box 4	ATTAAT	1570	6	-	Petroselinum crispum	light responsive element
CP_B18g01158	Box 4	ATTAAT	1613	6	-	Petroselinum crispum	light responsive element
CP_B18g01158	Box 4	ATTAAT	1978	6	-	Petroselinum crispum	light responsive element
CP_B18g01158	GARE-motif	TCTGTTG	1897	7	-	Brassica oleracea	gibberellin-responsive element
CP_B18g01158	O2-site	GATGA(C/T)(A/G)TG(A/G)	1679	8	+	Zea mays	zein metabolism regulation
CP_B18g01158	O2-site	GATGA(C/T)(A/G)TG(A/G)	1792	8	-	Zea mays	zein metabolism regulation
CP_B18g01158	GCN4_motif	TGAGTCA	801	7	-	Oryza sativa	endosperm expression
CP_B18g01158	LTR	CCGAAA	255	6	-	Hordeum vulgare	low-temperature responsiveness
CP_B18g01158	LTR	CCGAAA	984	6	-	Hordeum vulgare	low-temperature responsiveness
CP_B18g01158	LTR	CCGAAA	1095	6	-	Hordeum vulgare	low-temperature responsiveness
CP_B18g01158	ARE	AAACCA	397	6	-	Zea mays	anaerobic induction
CP_B18g01158	Sp1	GGGCGG	1244	6	+	Oryza sativa	light responsive element
CP_B18g01158	chs-Unit 1 m1	ACCTAACCCGC	1423	10	-	Hordeum vulgare	light responsive element
CP_B18g01158	GT1-motif	GGTTAA	661	6	+	Arabidopsis thaliana	light responsive element
CP_B18g01158	GT1-motif	GGTTAA	840	6	+	Arabidopsis thaliana	light responsive element
CP_B18g01158	GT1-motif	GGTTAA	1560	6	+	Arabidopsis thaliana	light responsive element
CP_B18g01335	AE-box	AGAAACTT	1742	8	-	Arabidopsis thaliana	light responsive element
CP_B18g01335	chs-Unit 1 m1	ACCTAACCCGC	689	10	-	Hordeum vulgare	light responsive element
CP_B18g01335	GT1-motif	GGTTAA	574	6	-	Arabidopsis thaliana	light responsive element
CP_B18g01335	TGA-element	AACGAC	1510	6	-	Brassica oleracea	auxin-responsive element
CP_B18g01335	TGACG-motif	TGACG	161	5	+	Hordeum vulgare	MeJA-responsiveness
CP_B18g01335	TCA-element	CCATCTTTTT	1460	9	+	Nicotiana tabacum	salicylic acid responsiveness
CP_B18g01335	GC-motif	CCCCCG	1855	6	+	Zea mays	anaerobic induction
CP_B18g01335	CGTCA-motif	CGTCA	161	5	-	Hordeum vulgare	MeJA-responsiveness
CP_B18g01335	G-Box	CACGTG	329	6	+	Pisum sativum	light responsive element
CP_B18g01335	G-Box	CACGTGAAA	527	9	-	Pisum sativum	light responsive element
CP_B18g01335	G-Box	CACGTG	530	6	+	Pisum sativum	light responsive element
CP_B18g01335	GCN4_motif	TGAGTCA	670	7	+	Oryza sativa	endosperm expression
CP_B18g01335	GARE-motif	TCTGTTG	1662	7	+	Brassica oleracea	gibberellin-responsive element
CP_B18g01335	G-box	CACGTG	329	6	+	Arabidopsis thaliana	light responsive element
CP_B18g01335	G-box	CACGTG	530	6	+	Arabidopsis thaliana	light responsive element
CP_B18g01335	L-box	ATCCCACCTAC	685	10	-	Petroselinum crispum	light responsive element
CP_B18g01335	TCT-motif	TCTTAC	27	6	+	Arabidopsis thaliana	light responsive element
CP_B18g01335	TCT-motif	TCTTAC	149	6	-	Arabidopsis thaliana	light responsive element
CP_B18g01335	TCCC-motif	TCTCCCT	612	7	+	Spinacia oleracea	light responsive element
CP_B18g01335	CAG-motif	GAAAGGCAGAC	1451	10	+	Arabidopsis thaliana	light responsive element
CP_B18g01335	ABRE	CACGTG	329	6	+	Arabidopsis thaliana	abscisic acid responsiveness
CP_B18g01335	ABRE	ACGTG	330	5	+	Arabidopsis thaliana	abscisic acid responsiveness
CP_B18g01335	ABRE	CACGTG	530	6	+	Arabidopsis thaliana	abscisic acid responsiveness
CP_B18g01335	ABRE	ACGTG	531	5	+	Arabidopsis thaliana	abscisic acid responsiveness
CP_B18g02109	TC-rich repeats	ATTCTCTAAC	911	9	-	Nicotiana tabacum	defense and stress responsiveness
CP_B18g02109	TCCC-motif	TCTCCCT	1124	7	-	Spinacia oleracea	light responsive element
CP_B18g02109	TCT-motif	TCTTAC	1067	6	+	Arabidopsis thaliana	light responsive element
CP_B18g02109	GATA-motif	AAGATAAGATT	1817	11	-	Arabidopsis thaliana	light responsive element
CP_B18g02109	ARE	AAACCA	1149	6	-	Zea mays	anaerobic induction
CP_B18g02109	ARE	AAACCA	1651	6	+	Zea mays	anaerobic induction
CP_B18g02109	CAT-box	GCCACT	1744	6	+	Arabidopsis thaliana	meristem expression
CP_B18g02109	Box 4	ATTAAT	704	6	+	Petroselinum crispum	light responsive element
CP_B18g02109	AuxRR-core	GGTCCAT	620	7	-	Nicotiana tabacum	auxin-responsive element
CP_B18g02109	circadian	CAAAGATATC	906	9	-	Lycopersicon esculentum	circadian control
CP_B18g02109	TCA-element	TCAGAAGAGG	865	9	-	Brassica oleracea	salicylic acid responsiveness
CP_B18g02110	ARE	AAACCA	679	6	-	Zea mays	anaerobic induction
CP_B18g02110	ARE	AAACCA	847	6	-	Zea mays	anaerobic induction
CP_B18g02110	ARE	AAACCA	1836	6	-	Zea mays	anaerobic induction
CP_B18g02110	ARE	AAACCA	1947	6	-	Zea mays	anaerobic induction
CP_B18g02110	LTR	CCGAAA	1182	6	-	Hordeum vulgare	low-temperature responsiveness
CP_B18g02110	LTR	CCGAAA	1801	6	+	Hordeum vulgare	low-temperature responsiveness
CP_B18g02110	AE-box	AGAAACAA	1911	8	-	Arabidopsis thaliana	light responsive element
CP_B18g02110	I-box	gGATAAGGTG	273	9	-	Zea mays	light responsive element
CP_B18g02110	G-Box	CACGTG	480	6	+	Pisum sativum	light responsive element
CP_B18g02110	G-Box	CACGTT	1046	6	-	Pisum sativum	light responsive element
CP_B18g02110	G-Box	CACGTG	1132	6	-	Pisum sativum	light responsive element
CP_B18g02110	TATC-box	TATCCCA	1433	7	-	Oryza sativa	gibberellin-responsive element
CP_B18g02110	G-box	CACGTG	480	6	+	Arabidopsis thaliana	light responsive element
CP_B18g02110	G-box	ACACGTGT	1131	8	-	Brassica napus	light responsive element
CP_B18g02110	G-box	CACGTG	1132	6	-	Arabidopsis thaliana	light responsive element
CP_B18g02110	G-box	CACGAC	1829	6	-	Zea mays	light responsive element
CP_B18g02110	CAT-box	GCCACT	472	6	-	Arabidopsis thaliana	meristem expression
CP_B18g02110	TCT-motif	TCTTAC	720	6	+	Arabidopsis thaliana	light responsive element
CP_B18g02110	MRE	AACCTAA	1413	7	-	Petroselinum crispum	light responsive element
CP_B18g02110	MBS	CAACTG	460	6	-	Arabidopsis thaliana	drought-inducibility
CP_B18g02110	MBS	CAACTG	822	6	-	Arabidopsis thaliana	drought-inducibility
CP_B18g02110	ABRE	CACGTG	480	6	+	Arabidopsis thaliana	abscisic acid responsiveness
CP_B18g02110	ABRE	ACGTG	481	5	+	Arabidopsis thaliana	abscisic acid responsiveness
CP_B18g02110	ABRE	ACGTG	1047	5	+	Arabidopsis thaliana	abscisic acid responsiveness
CP_B18g02110	ABRE	CACGTG	1132	6	-	Arabidopsis thaliana	abscisic acid responsiveness
CP_B18g02110	ABRE	ACGTG	1133	5	+	Arabidopsis thaliana	abscisic acid responsiveness
CP_B19g01374	ABRE	ACGTG	343	5	-	Arabidopsis thaliana	abscisic acid responsiveness
CP_B19g01374	ABRE	ACGTG	1134	5	-	Arabidopsis thaliana	abscisic acid responsiveness
CP_B19g01374	MBS	CAACTG	120	6	+	Arabidopsis thaliana	drought-inducibility
CP_B19g01374	TCCC-motif	TCTCCCT	1955	7	+	Spinacia oleracea	light responsive element
CP_B19g01374	P-box	CCTTTTG	193	7	-	Oryza sativa	gibberellin-responsive element
CP_B19g01374	GATA-motif	GATAGGA	206	7	+	Arabidopsis thaliana	light responsive element
CP_B19g01374	GATA-motif	AAGGATAAGG	588	9	-	Solanum tuberosum	light responsive element
CP_B19g01374	ACA-motif	AATTACAGCCATT	1919	12	+	Pisum sativum	light responsive element
CP_B19g01374	G-box	CACGTC	343	6	+	Zea mays	light responsive element
CP_B19g01374	G-box	CACGAC	973	6	+	Zea mays	light responsive element
CP_B19g01374	G-box	TACGTG	1134	6	-	Arabidopsis thaliana	light responsive element
CP_B19g01374	AT1-motif	AATTATTTTTTATT	1215	13	-	Solanum tuberosum	light responsive element
CP_B19g01374	Gap-box	CAAATGAA(A/G)A	1589	9.5	+	Arabidopsis thaliana	light responsive element
CP_B19g01374	Box 4	ATTAAT	1823	6	-	Petroselinum crispum	light responsive element
CP_B19g01374	O2-site	GATGACATGG	1663	9	+	Zea mays	zein metabolism regulation
CP_B19g01374	I-box	gGATAAGGTG	515	9	-	Zea mays	light responsive element
CP_B19g01374	I-box	ccttatcct	588	9	+	Arabidopsis thaliana	light responsive element
CP_B19g01374	I-box	cCATATCCAAT	1529	10	+	Flaveria trinervia	light responsive element
CP_B19g01374	AuxRR-core	GGTCCAT	270	7	+	Nicotiana tabacum	auxin-responsive element
CP_B19g01374	AuxRR-core	GGTCCAT	321	7	-	Nicotiana tabacum	auxin-responsive element
CP_B19g01374	ARE	AAACCA	1079	6	+	Zea mays	anaerobic induction
CP_B19g01374	ARE	AAACCA	1441	6	+	Zea mays	anaerobic induction
CP_B19g01375	ARE	AAACCA	1062	6	+	Zea mays	anaerobic induction
CP_B19g01375	ARE	AAACCA	1417	6	+	Zea mays	anaerobic induction
CP_B19g01375	Box 4	ATTAAT	1823	6	-	Petroselinum crispum	light responsive element
CP_B19g01375	O2-site	GATGACATGG	1663	9	+	Zea mays	zein metabolism regulation
CP_B19g01375	G-box	CACGAC	956	6	+	Zea mays	light responsive element
CP_B19g01375	G-box	TACGTG	1117	6	-	Arabidopsis thaliana	light responsive element
CP_B19g01375	Gap-box	CAAATGAA(A/G)A	1589	9.5	+	Arabidopsis thaliana	light responsive element
CP_B19g01375	AT1-motif	AATTATTTTTTATT	1186	13	-	Solanum tuberosum	light responsive element
CP_B19g01375	I-box	gGATAAGGTG	498	9	-	Zea mays	light responsive element
CP_B19g01375	I-box	ccttatcct	571	9	+	Arabidopsis thaliana	light responsive element
CP_B19g01375	I-box	cCATATCCAAT	1505	10	+	Flaveria trinervia	light responsive element
CP_B19g01375	ACA-motif	AATTACAGCCATT	1919	12	+	Pisum sativum	light responsive element
CP_B19g01375	MBS	CAACTG	290	6	+	Arabidopsis thaliana	drought-inducibility
CP_B19g01375	MBS	CAACTG	438	6	+	Arabidopsis thaliana	drought-inducibility
CP_B19g01375	TCCC-motif	TCTCCCT	1955	7	+	Spinacia oleracea	light responsive element
CP_B19g01375	ABRE	ACGTG	1117	5	-	Arabidopsis thaliana	abscisic acid responsiveness
CP_B19g01375	GATA-motif	GATAGGA	432	7	-	Arabidopsis thaliana	light responsive element
CP_B19g01375	GATA-motif	AAGGATAAGG	500	9	-	Solanum tuberosum	light responsive element
CP_B19g01375	GATA-motif	AAGGATAAGG	571	9	-	Solanum tuberosum	light responsive element
CP_B19g01375	P-box	CCTTTTG	364	7	-	Oryza sativa	gibberellin-responsive element
CP_B19g01626	AAAC-motif	CAATCAAAACCT	1975	11	-	Spinacia oleracea	light responsive element
CP_B19g01626	GATA-motif	AAGATAAGATT	1587	10	-	Arabidopsis thaliana	light responsive element
CP_B19g01626	MRE	AACCTAA	979	7	+	Petroselinum crispum	light responsive element
CP_B19g01626	MBS	CAACTG	193	6	-	Arabidopsis thaliana	drought-inducibility
CP_B19g01626	ABRE	ACGTG	187	5	-	Arabidopsis thaliana	abscisic acid responsiveness
CP_B19g01626	ABRE	CACGTG	1663	6	-	Arabidopsis thaliana	abscisic acid responsiveness
CP_B19g01626	ABRE	ACGTG	1664	5	+	Arabidopsis thaliana	abscisic acid responsiveness
CP_B19g01626	ARE	AAACCA	1928	6	+	Zea mays	anaerobic induction
CP_B19g01626	ARE	AAACCA	1975	6	-	Zea mays	anaerobic induction
CP_B19g01626	GT1-motif	GGTTAA	904	6	-	Arabidopsis thaliana	light responsive element
CP_B19g01626	chs-CMA2a	TCACTTGA	1631	8	+	Petroselinum crispum	light responsive element
CP_B19g01626	TCA-element	CCATCTTTTT	855	9	+	Nicotiana tabacum	salicylic acid responsiveness
CP_B19g01626	ATCT-motif	AATCTAATCC	1025	9	+	Pisum sativum	light responsive element
CP_B19g01626	G-Box	CACGTG	1663	6	-	Pisum sativum	light responsive element
CP_B19g01626	Box 4	ATTAAT	129	6	+	Petroselinum crispum	light responsive element
CP_B19g01626	Box 4	ATTAAT	499	6	+	Petroselinum crispum	light responsive element
CP_B19g01626	Box 4	ATTAAT	985	6	+	Petroselinum crispum	light responsive element
CP_B19g01626	Box 4	ATTAAT	1098	6	-	Petroselinum crispum	light responsive element
CP_B19g01626	Box 4	ATTAAT	1233	6	-	Petroselinum crispum	light responsive element
CP_B19g01626	Gap-box	CAAATGAA(A/G)A	861	9.5	-	Arabidopsis thaliana	light responsive element
CP_B19g01626	AT1-motif	AATTATTTTTTATT	628	13	+	Solanum tuberosum	light responsive element
CP_B19g01626	G-box	TACGTG	187	6	-	Arabidopsis thaliana	light responsive element
CP_B19g01626	G-box	CACGTG	1663	6	-	Arabidopsis thaliana	light responsive element
CP_B19g01720	MRE	AACCTAA	1371	7	-	Petroselinum crispum	light responsive element
CP_B19g01720	TCCC-motif	TCTCCCT	556	7	+	Spinacia oleracea	light responsive element
CP_B19g01720	ABRE	ACGTG	715	5	+	Arabidopsis thaliana	abscisic acid responsiveness
CP_B19g01720	ABRE	ACGTG	1181	5	+	Arabidopsis thaliana	abscisic acid responsiveness
CP_B19g01720	ARE	AAACCA	329	6	-	Zea mays	anaerobic induction
CP_B19g01720	Sp1	GGGCGG	380	6	-	Oryza sativa	light responsive element
CP_B19g01720	Sp1	GGGCGG	1185	6	+	Oryza sativa	light responsive element
CP_B19g01720	Sp1	GGGCGG	1236	6	-	Oryza sativa	light responsive element
CP_B19g01720	Sp1	GGGCGG	1414	6	-	Oryza sativa	light responsive element
CP_B19g01720	Sp1	GGGCGG	1463	6	+	Oryza sativa	light responsive element
CP_B19g01720	LTR	CCGAAA	1458	6	-	Hordeum vulgare	low-temperature responsiveness
CP_B19g01720	GT1-motif	GGTTAAT	896	7	+	Avena sativa	light responsive element
CP_B19g01720	TGA-element	AACGAC	116	6	+	Brassica oleracea	auxin-responsive element
CP_B19g01720	TGA-element	AACGAC	1751	6	+	Brassica oleracea	auxin-responsive element
CP_B19g01720	TGACG-motif	TGACG	166	5	-	Hordeum vulgare	MeJA-responsiveness
CP_B19g01720	circadian	CAAAGATATC	313	9	-	Lycopersicon esculentum	circadian control
CP_B19g01720	CGTCA-motif	CGTCA	166	5	+	Hordeum vulgare	MeJA-responsiveness
CP_B19g01720	O2-site	GATGA(C/T)(A/G)TG(A/G)	1903	8	+	Zea mays	zein metabolism regulation
CP_B19g01720	G-box	TACGTG	714	6	+	Arabidopsis thaliana	light responsive element
CP_B19g01720	G-box	CACGTC	1180	6	-	Zea mays	light responsive element
CP_B19g01720	G-box	CACGAC	1811	6	-	Zea mays	light responsive element
CP_B20g00613	ARE	AAACCA	243	6	+	Zea mays	anaerobic induction
CP_B20g00613	ARE	AAACCA	1195	6	-	Zea mays	anaerobic induction
CP_B20g00613	AE-box	AGAAACAA	1150	8	-	Arabidopsis thaliana	light responsive element
CP_B20g00613	AE-box	AGAAACAA	1579	8	-	Arabidopsis thaliana	light responsive element
CP_B20g00613	ACE	CTAACGTATT	336	9	-	Petroselinum crispum	light responsive element
CP_B20g00613	ACE	CTAACGTATT	741	9	-	Petroselinum crispum	light responsive element
CP_B20g00613	GT1-motif	GGTTAAT	669	7	+	Avena sativa	light responsive element
CP_B20g00613	TGACG-motif	TGACG	745	5	-	Hordeum vulgare	MeJA-responsiveness
CP_B20g00613	TGACG-motif	TGACG	767	5	-	Hordeum vulgare	MeJA-responsiveness
CP_B20g00613	CGTCA-motif	CGTCA	745	5	+	Hordeum vulgare	MeJA-responsiveness
CP_B20g00613	CGTCA-motif	CGTCA	767	5	+	Hordeum vulgare	MeJA-responsiveness
CP_B20g00613	AuxRR-core	GGTCCAT	863	7	+	Nicotiana tabacum	auxin-responsive element
CP_B20g00613	AuxRR-core	GGTCCAT	1418	7	+	Nicotiana tabacum	auxin-responsive element
CP_B20g00613	Box 4	ATTAAT	663	6	+	Petroselinum crispum	light responsive element
CP_B20g00613	G-Box	CACGTT	273	6	-	Pisum sativum	light responsive element
CP_B20g00613	O2-site	GATGATGTGG	1487	9	-	Zea mays	zein metabolism regulation
CP_B20g00613	TATC-box	TATCCCA	1963	7	+	Oryza sativa	gibberellin-responsive element
CP_B20g00613	TCT-motif	TCTTAC	51	6	+	Arabidopsis thaliana	light responsive element
CP_B20g00613	GATA-motif	GATAGGA	1978	7	-	Arabidopsis thaliana	light responsive element
CP_B20g00613	P-box	CCTTTTG	687	7	-	Oryza sativa	gibberellin-responsive element
CP_B20g00613	P-box	CCTTTTG	1146	7	+	Oryza sativa	gibberellin-responsive element
CP_B20g00613	MRE	AACCTAA	1260	7	-	Petroselinum crispum	light responsive element
CP_B20g00613	MBS	CAACTG	1878	6	-	Arabidopsis thaliana	drought-inducibility
CP_B20g00613	ABRE	ACGTG	274	5	+	Arabidopsis thaliana	abscisic acid responsiveness
CP_B20g00613	ABRE	TACGGTC	996	7	-	Arabidopsis thaliana	abscisic acid responsiveness
CP_B20g00613	ABRE	TACGGTC	1001	7	+	Arabidopsis thaliana	abscisic acid responsiveness
CP_B20g01068	Box 4	ATTAAT	357	6	+	Petroselinum crispum	light responsive element
CP_B20g01068	Box 4	ATTAAT	397	6	+	Petroselinum crispum	light responsive element
CP_B20g01068	Box 4	ATTAAT	854	6	+	Petroselinum crispum	light responsive element
CP_B20g01068	Box 4	ATTAAT	1133	6	-	Petroselinum crispum	light responsive element
CP_B20g01068	GCN4_motif	TGAGTCA	1395	7	-	Oryza sativa	endosperm expression
CP_B20g01068	O2-site	GATGATGTGG	55	9	-	Zea mays	zein metabolism regulation
CP_B20g01068	O2-site	GATGACATGG	1510	9	+	Zea mays	zein metabolism regulation
CP_B20g01068	G-box	TACGTG	211	6	-	Arabidopsis thaliana	light responsive element
CP_B20g01068	G-box	CACGAC	1559	6	+	Zea mays	light responsive element
CP_B20g01068	CAT-box	GCCACT	1894	6	+	Arabidopsis thaliana	meristem expression
CP_B20g01068	CGTCA-motif	CGTCA	1656	5	+	Hordeum vulgare	MeJA-responsiveness
CP_B20g01068	GT1-motif	GGTTAAT	995	7	+	Avena sativa	light responsive element
CP_B20g01068	GT1-motif	GGTTAAT	1257	7	-	Avena sativa	light responsive element
CP_B20g01068	GT1-motif	GGTTAA	1258	6	-	Arabidopsis thaliana	light responsive element
CP_B20g01068	TGACG-motif	TGACG	1656	5	-	Hordeum vulgare	MeJA-responsiveness
CP_B20g01068	ARE	AAACCA	1373	6	-	Zea mays	anaerobic induction
CP_B20g01068	GATT-motif	CTCCTGATTGGA	592	11	-	Oryza sativa	light responsive element
CP_B20g01068	MBS	CAACTG	543	6	+	Arabidopsis thaliana	drought-inducibility
CP_B20g01068	TCCC-motif	TCTCCCT	1705	7	+	Spinacia oleracea	light responsive element
CP_B20g01068	ABRE	ACGTG	211	5	-	Arabidopsis thaliana	abscisic acid responsiveness
CP_B20g01068	TCT-motif	TCTTAC	154	6	+	Arabidopsis thaliana	light responsive element
CP_B20g01068	TCT-motif	TCTTAC	186	6	+	Arabidopsis thaliana	light responsive element
CP_B20g01155	MBS	CAACTG	765	6	+	Arabidopsis thaliana	drought-inducibility
CP_B20g01155	MBS	CAACTG	1716	6	-	Arabidopsis thaliana	drought-inducibility
CP_B20g01155	HD-Zip 1	CAAT(A/T)ATTG	646	8	+	Arabidopsis thaliana	palisade mesophyll cells
CP_B20g01155	ABRE	CACGTG	500	6	+	Arabidopsis thaliana	abscisic acid responsiveness
CP_B20g01155	ABRE	ACGTG	501	5	+	Arabidopsis thaliana	abscisic acid responsiveness
CP_B20g01155	ABRE	CACGTG	522	6	+	Arabidopsis thaliana	abscisic acid responsiveness
CP_B20g01155	ABRE	ACGTG	523	5	+	Arabidopsis thaliana	abscisic acid responsiveness
CP_B20g01155	ABRE	ACGTG	542	5	-	Arabidopsis thaliana	abscisic acid responsiveness
CP_B20g01155	ABRE	CACGTG	730	6	+	Arabidopsis thaliana	abscisic acid responsiveness
CP_B20g01155	ABRE	ACGTG	731	5	+	Arabidopsis thaliana	abscisic acid responsiveness
CP_B20g01155	GATA-motif	AAGATAAGATT	809	11	+	Arabidopsis thaliana	light responsive element
CP_B20g01155	MRE	AACCTAA	744	7	-	Petroselinum crispum	light responsive element
CP_B20g01155	GT1-motif	GGTTAA	196	6	-	Arabidopsis thaliana	light responsive element
CP_B20g01155	TGACG-motif	TGACG	442	5	-	Hordeum vulgare	MeJA-responsiveness
CP_B20g01155	TGACG-motif	TGACG	595	5	-	Hordeum vulgare	MeJA-responsiveness
CP_B20g01155	ARE	AAACCA	833	6	-	Zea mays	anaerobic induction
CP_B20g01155	ARE	AAACCA	1073	6	-	Zea mays	anaerobic induction
CP_B20g01155	ARE	AAACCA	1089	6	+	Zea mays	anaerobic induction
CP_B20g01155	ARE	AAACCA	1797	6	-	Zea mays	anaerobic induction
CP_B20g01155	ARE	AAACCA	1956	6	-	Zea mays	anaerobic induction
CP_B20g01155	Box 4	ATTAAT	347	6	+	Petroselinum crispum	light responsive element
CP_B20g01155	Box 4	ATTAAT	852	6	+	Petroselinum crispum	light responsive element
CP_B20g01155	Box 4	ATTAAT	1080	6	-	Petroselinum crispum	light responsive element
CP_B20g01155	Box 4	ATTAAT	1766	6	-	Petroselinum crispum	light responsive element
CP_B20g01155	G-Box	CACGTG	500	6	+	Pisum sativum	light responsive element
CP_B20g01155	G-Box	CACGTG	522	6	+	Pisum sativum	light responsive element
CP_B20g01155	G-Box	CACGTT	542	6	+	Pisum sativum	light responsive element
CP_B20g01155	G-Box	CACGTGAAA	727	9	-	Pisum sativum	light responsive element
CP_B20g01155	G-Box	CACGTG	730	6	+	Pisum sativum	light responsive element
CP_B20g01155	GCN4_motif	TGAGTCA	115	7	-	Oryza sativa	endosperm expression
CP_B20g01155	O2-site	GATGACATGG	1066	9	+	Zea mays	zein metabolism regulation
CP_B20g01155	G-box	CACGTG	500	6	+	Arabidopsis thaliana	light responsive element
CP_B20g01155	G-box	CACGTG	522	6	+	Arabidopsis thaliana	light responsive element
CP_B20g01155	G-box	CACGTG	730	6	+	Arabidopsis thaliana	light responsive element
CP_B20g01155	TATC-box	TATCCCA	300	7	-	Oryza sativa	gibberellin-responsive element
CP_B20g01155	CGTCA-motif	CGTCA	442	5	+	Hordeum vulgare	MeJA-responsiveness
CP_B20g01155	CGTCA-motif	CGTCA	595	5	+	Hordeum vulgare	MeJA-responsiveness
CP_B20g01155	AuxRR-core	GGTCCAT	1826	7	+	Nicotiana tabacum	auxin-responsive element
CP_B20g01161	ARE	AAACCA	107	6	-	Zea mays	anaerobic induction
CP_B20g01161	ARE	AAACCA	339	6	-	Zea mays	anaerobic induction
CP_B20g01161	ARE	AAACCA	355	6	+	Zea mays	anaerobic induction
CP_B20g01161	ARE	AAACCA	1059	6	-	Zea mays	anaerobic induction
CP_B20g01161	ARE	AAACCA	1218	6	-	Zea mays	anaerobic induction
CP_B20g01161	ARE	AAACCA	1608	6	+	Zea mays	anaerobic induction
CP_B20g01161	ARE	AAACCA	1619	6	+	Zea mays	anaerobic induction
CP_B20g01161	Box 4	ATTAAT	346	6	+	Petroselinum crispum	light responsive element
CP_B20g01161	Box 4	ATTAAT	1028	6	-	Petroselinum crispum	light responsive element
CP_B20g01161	Box 4	ATTAAT	1972	6	-	Petroselinum crispum	light responsive element
CP_B20g01161	O2-site	GATGACATGG	332	9	+	Zea mays	zein metabolism regulation
CP_B20g01161	G-Box	CACGTG	3	6	+	Pisum sativum	light responsive element
CP_B20g01161	G-Box	CACGTT	1271	6	+	Pisum sativum	light responsive element
CP_B20g01161	G-box	CACGTG	3	6	+	Arabidopsis thaliana	light responsive element
CP_B20g01161	TCA-element	TCAGAAGAGG	1654	9	+	Brassica oleracea	salicylic acid responsiveness
CP_B20g01161	AuxRR-core	GGTCCAT	1088	7	+	Nicotiana tabacum	auxin-responsive element
CP_B20g01161	MBS	CAACTG	38	6	+	Arabidopsis thaliana	drought-inducibility
CP_B20g01161	MBS	CAACTG	978	6	-	Arabidopsis thaliana	drought-inducibility
CP_B20g01161	MBS	CAACTG	1485	6	+	Arabidopsis thaliana	drought-inducibility
CP_B20g01161	ABRE	CACGTG	3	6	+	Arabidopsis thaliana	abscisic acid responsiveness
CP_B20g01161	ABRE	ACGTG	4	5	+	Arabidopsis thaliana	abscisic acid responsiveness
CP_B20g01161	ABRE	ACGTG	1271	5	-	Arabidopsis thaliana	abscisic acid responsiveness
CP_B20g01161	GATA-motif	AAGATAAGATT	83	11	+	Arabidopsis thaliana	light responsive element
CP_B20g01161	MRE	AACCTAA	17	7	-	Petroselinum crispum	light responsive element
CP_B20g01209	I-box	TGATAATGT	1736	9	+	Solanum tuberosum	light responsive element
CP_B20g01209	ATCT-motif	AATCTAATCC	1324	9	-	Pisum sativum	light responsive element
CP_B20g01209	TCA-element	CCATCTTTTT	1601	9	+	Nicotiana tabacum	salicylic acid responsiveness
CP_B20g01209	GC-motif	CCCCCG	849	6	+	Zea mays	anaerobic induction
CP_B20g01209	CAT-box	GCCACT	252	6	-	Arabidopsis thaliana	meristem expression
CP_B20g01209	G-box	CACGAC	931	6	+	Zea mays	light responsive element
CP_B20g01209	G-box	CACGTG	1684	6	-	Arabidopsis thaliana	light responsive element
CP_B20g01209	G-box	TACGTG	1991	6	-	Arabidopsis thaliana	light responsive element
CP_B20g01209	Gap-box	CAAATGAA(A/G)A	1067	9.5	-	Arabidopsis thaliana	light responsive element
CP_B20g01209	MSA-like	TCAAACGGT	1718	9	-	Catharanthus roseus	cell cycle regulation
CP_B20g01209	Box 4	ATTAAT	130	6	+	Petroselinum crispum	light responsive element
CP_B20g01209	Box 4	ATTAAT	552	6	+	Petroselinum crispum	light responsive element
CP_B20g01209	Box 4	ATTAAT	1003	6	-	Petroselinum crispum	light responsive element
CP_B20g01209	Box 4	ATTAAT	1089	6	-	Petroselinum crispum	light responsive element
CP_B20g01209	Box 4	ATTAAT	1206	6	-	Petroselinum crispum	light responsive element
CP_B20g01209	Box 4	ATTAAT	1238	6	-	Petroselinum crispum	light responsive element
CP_B20g01209	Box 4	ATTAAT	1259	6	-	Petroselinum crispum	light responsive element
CP_B20g01209	O2-site	GATGACATGG	182	9	+	Zea mays	zein metabolism regulation
CP_B20g01209	O2-site	GATGACATGG	1938	9	-	Zea mays	zein metabolism regulation
CP_B20g01209	GCN4_motif	TGAGTCA	457	7	+	Oryza sativa	endosperm expression
CP_B20g01209	GCN4_motif	TGAGTCA	1213	7	+	Oryza sativa	endosperm expression
CP_B20g01209	G-Box	CACGTG	1684	6	-	Pisum sativum	light responsive element
CP_B20g01209	LTR	CCGAAA	283	6	-	Hordeum vulgare	low-temperature responsiveness
CP_B20g01209	ARE	AAACCA	1582	6	+	Zea mays	anaerobic induction
CP_B20g01209	TCT-motif	TCTTAC	1012	6	+	Arabidopsis thaliana	light responsive element
CP_B20g01209	TCT-motif	TCTTAC	1409	6	+	Arabidopsis thaliana	light responsive element
CP_B20g01209	RY-element	CATGCATG	1974	8	-	Helianthus annuus	seed-specific regulation
CP_B20g01209	RY-element	CATGCATG	1978	8	-	Helianthus annuus	seed-specific regulation
CP_B20g01209	ABRE	CACGTG	1684	6	-	Arabidopsis thaliana	abscisic acid responsiveness
CP_B20g01209	ABRE	ACGTG	1685	5	+	Arabidopsis thaliana	abscisic acid responsiveness
CP_B20g01209	ABRE	ACGTG	1991	5	-	Arabidopsis thaliana	abscisic acid responsiveness
CP_B20g01408	GATA-motif	GATAGGG	1873	7	+	Pisum sativum	light responsive element
CP_B20g01408	MBS	CAACTG	1540	6	-	Arabidopsis thaliana	drought-inducibility
CP_B20g01408	TCCC-motif	TCTCCCT	1837	7	+	Spinacia oleracea	light responsive element
CP_B20g01408	GA-motif	ATAGATAA	436	8	-	Arabidopsis thaliana	light responsive element
CP_B20g01408	GC-motif	CCCCCG	1414	6	+	Zea mays	anaerobic induction
CP_B20g01408	CGTCA-motif	CGTCA	202	5	+	Hordeum vulgare	MeJA-responsiveness
CP_B20g01408	CGTCA-motif	CGTCA	903	5	-	Hordeum vulgare	MeJA-responsiveness
CP_B20g01408	AuxRR-core	GGTCCAT	1586	7	-	Nicotiana tabacum	auxin-responsive element
CP_B20g01408	Box 4	ATTAAT	543	6	+	Petroselinum crispum	light responsive element
CP_B20g01408	Box 4	ATTAAT	1009	6	-	Petroselinum crispum	light responsive element
CP_B20g01408	Box 4	ATTAAT	1099	6	-	Petroselinum crispum	light responsive element
CP_B20g01408	Box 4	ATTAAT	1337	6	-	Petroselinum crispum	light responsive element
CP_B20g01408	O2-site	GATGA(C/T)(A/G)TG(A/G)	1550	8.5	-	Zea mays	zein metabolism regulation
CP_B20g01408	G-box	TACGTG	92	6	-	Arabidopsis thaliana	light responsive element
CP_B20g01408	G-box	CACGAC	739	6	+	Zea mays	light responsive element
CP_B20g01408	G-box	CACGAC	780	6	+	Zea mays	light responsive element
CP_B20g01408	G-box	CACGTG	795	6	+	Arabidopsis thaliana	light responsive element
CP_B20g01408	G-box	CACGTG	841	6	+	Arabidopsis thaliana	light responsive element
CP_B20g01408	G-box	TACGTG	929	6	+	Arabidopsis thaliana	light responsive element
CP_B20g01408	G-box	CCACGTAA	1376	8	+	Brassica napus	light responsive element
CP_B20g01408	G-box	TACGTG	1377	6	-	Arabidopsis thaliana	light responsive element
CP_B20g01408	G-box	CACGAC	1856	6	-	Zea mays	light responsive element
CP_B20g01408	LTR	CCGAAA	1417	6	+	Hordeum vulgare	low-temperature responsiveness
CP_B20g01408	GT1-motif	GGTTAA	1322	6	+	Arabidopsis thaliana	light responsive element
CP_B20g01408	GT1-motif	GGTTAAT	1787	7	-	Avena sativa	light responsive element
CP_B20g01408	GT1-motif	GGTTAA	1788	6	-	Arabidopsis thaliana	light responsive element
CP_B20g01408	GT1-motif	GGTTAA	1807	6	-	Arabidopsis thaliana	light responsive element
CP_B20g01408	TGA-element	AACGAC	948	6	-	Brassica oleracea	auxin-responsive element
CP_B20g01408	TCT-motif	TCTTAC	110	6	-	Arabidopsis thaliana	light responsive element
CP_B20g01408	TCT-motif	TCTTAC	287	6	-	Arabidopsis thaliana	light responsive element
CP_B20g01408	ABRE	ACGTG	92	5	-	Arabidopsis thaliana	abscisic acid responsiveness
CP_B20g01408	ABRE	CACGTG	795	6	+	Arabidopsis thaliana	abscisic acid responsiveness
CP_B20g01408	ABRE	ACGTG	796	5	+	Arabidopsis thaliana	abscisic acid responsiveness
CP_B20g01408	ABRE	CACGTG	841	6	+	Arabidopsis thaliana	abscisic acid responsiveness
CP_B20g01408	ABRE	ACGTG	842	5	+	Arabidopsis thaliana	abscisic acid responsiveness
CP_B20g01408	ABRE	ACGTG	930	5	+	Arabidopsis thaliana	abscisic acid responsiveness
CP_B20g01408	ABRE	ACGTG	1377	5	-	Arabidopsis thaliana	abscisic acid responsiveness
CP_B20g01408	TC-rich repeats	ATTCTCTAAC	1443	9	-	Nicotiana tabacum	defense and stress responsiveness
CP_B20g01408	TC-rich repeats	ATTCTCTAAC	1495	9	+	Nicotiana tabacum	defense and stress responsiveness
CP_B20g01408	TCA-element	CCATCTTTTT	313	9	-	Nicotiana tabacum	salicylic acid responsiveness
CP_B20g01408	G-Box	CACGTG	795	6	+	Pisum sativum	light responsive element
CP_B20g01408	G-Box	CACGTG	841	6	+	Pisum sativum	light responsive element
CP_B20g01408	ARE	AAACCA	1362	6	-	Zea mays	anaerobic induction
CP_B20g01408	TGA-box	TGACGTAA	199	8	-	Glycine max	auxin-responsive element
CP_B20g01408	ATC-motif	AGTAATCT	603	8	+	Spinacia oleracea	light responsive element
CP_B20g01408	TGACG-motif	TGACG	202	5	-	Hordeum vulgare	MeJA-responsiveness
CP_B20g01408	TGACG-motif	TGACG	903	5	+	Hordeum vulgare	MeJA-responsiveness
CP_B20g01643	chs-CMA1a	TTACTTAA	598	8	+	Daucus carota	light responsive element
CP_B20g01643	ARE	AAACCA	1361	6	+	Zea mays	anaerobic induction
CP_B20g01643	Box 4	ATTAAT	881	6	+	Petroselinum crispum	light responsive element
CP_B20g01643	circadian	CAAAGATATC	1171	9	+	Lycopersicon esculentum	circadian control
CP_B20g01643	TCA-element	CCATCTTTTT	1283	9	+	Nicotiana tabacum	salicylic acid responsiveness
CP_B20g01643	I-box	gGATAAGGTG	68	9	-	Zea mays	light responsive element
CP_B20g01643	I-box	TGATAATGT	1623	9	-	Solanum tuberosum	light responsive element
CP_B20g01643	TCCC-motif	TCTCCCT	569	7	+	Spinacia oleracea	light responsive element
CP_B20g01643	MBS	CAACTG	635	6	+	Arabidopsis thaliana	drought-inducibility
CP_B20g01643	GATA-motif	AAGGATAAGG	70	9	-	Solanum tuberosum	light responsive element
CP_B20g01644	AAAC-motif	CAATCAAAACCT	1960	11	-	Spinacia oleracea	light responsive element
CP_B20g01644	ABRE	ACGTG	1600	5	-	Arabidopsis thaliana	abscisic acid responsiveness
CP_B20g01644	ABRE	ACGTG	1864	5	+	Arabidopsis thaliana	abscisic acid responsiveness
CP_B20g01644	GATA-motif	GATAGGG	956	7	-	Pisum sativum	light responsive element
CP_B20g01644	TGA-element	AACGAC	1652	6	+	Brassica oleracea	auxin-responsive element
CP_B20g01644	TGACG-motif	TGACG	1530	5	+	Hordeum vulgare	MeJA-responsiveness
CP_B20g01644	TGACG-motif	TGACG	1602	5	-	Hordeum vulgare	MeJA-responsiveness
CP_B20g01644	TGACG-motif	TGACG	1906	5	+	Hordeum vulgare	MeJA-responsiveness
CP_B20g01644	ARE	AAACCA	412	6	+	Zea mays	anaerobic induction
CP_B20g01644	Sp1	GGGCGG	242	6	+	Oryza sativa	light responsive element
CP_B20g01644	Sp1	GGGCGG	1715	6	-	Oryza sativa	light responsive element
CP_B20g01644	AE-box	AGAAACAA	1072	8	-	Arabidopsis thaliana	light responsive element
CP_B20g01644	Box 4	ATTAAT	843	6	+	Petroselinum crispum	light responsive element
CP_B20g01644	Box 4	ATTAAT	1884	6	-	Petroselinum crispum	light responsive element
CP_B20g01644	GCN4_motif	TGAGTCA	1803	7	-	Oryza sativa	endosperm expression
CP_B20g01644	GCN4_motif	TGAGTCA	1935	7	-	Oryza sativa	endosperm expression
CP_B20g01644	O2-site	GATGA(C/T)(A/G)TG(A/G)	1055	8	-	Zea mays	zein metabolism regulation
CP_B20g01644	O2-site	GATGA(C/T)(A/G)TG(A/G)	1089	8	-	Zea mays	zein metabolism regulation
CP_B20g01644	O2-site	GATGATGTGG	1438	9	-	Zea mays	zein metabolism regulation
CP_B20g01644	O2-site	GATGA(C/T)(A/G)TG(A/G)	1599	8	-	Zea mays	zein metabolism regulation
CP_B20g01644	GARE-motif	TCTGTTG	145	7	-	Brassica oleracea	gibberellin-responsive element
CP_B20g01644	G-box	CACGTC	1600	6	+	Zea mays	light responsive element
CP_B20g01644	G-box	TACGTG	1863	6	+	Arabidopsis thaliana	light responsive element
CP_B20g01644	CGTCA-motif	CGTCA	1530	5	-	Hordeum vulgare	MeJA-responsiveness
CP_B20g01644	CGTCA-motif	CGTCA	1602	5	+	Hordeum vulgare	MeJA-responsiveness
CP_B20g01644	CGTCA-motif	CGTCA	1906	5	-	Hordeum vulgare	MeJA-responsiveness
CP_B20g01873	ARE	AAACCA	37	6	+	Zea mays	anaerobic induction
CP_B20g01873	ARE	AAACCA	1103	6	+	Zea mays	anaerobic induction
CP_B20g01873	GT1-motif	GGTTAA	677	6	-	Arabidopsis thaliana	light responsive element
CP_B20g01873	G-Box	CACGTT	1621	6	+	Pisum sativum	light responsive element
CP_B20g01873	GARE-motif	TCTGTTG	802	7	-	Brassica oleracea	gibberellin-responsive element
CP_B20g01873	O2-site	GATGATGTGG	1983	9	+	Zea mays	zein metabolism regulation
CP_B20g01873	Box 4	ATTAAT	1119	6	-	Petroselinum crispum	light responsive element
CP_B20g01873	Box 4	ATTAAT	1395	6	-	Petroselinum crispum	light responsive element
CP_B20g01873	Box 4	ATTAAT	1568	6	-	Petroselinum crispum	light responsive element
CP_B20g01873	Box 4	ATTAAT	1755	6	-	Petroselinum crispum	light responsive element
CP_B20g01873	TATC-box	TATCCCA	1042	7	-	Oryza sativa	gibberellin-responsive element
CP_B20g01873	AT1-motif	AATTATTTTTTATT	1373	13	+	Solanum tuberosum	light responsive element
CP_B20g01873	G-box	TAAACGTG	1621	8	-	Brassica oleracea	light responsive element
CP_B20g01873	TCCC-motif	TCTCCCT	1960	7	-	Spinacia oleracea	light responsive element
CP_B20g01873	MBS	CAACTG	648	6	+	Arabidopsis thaliana	drought-inducibility
CP_B20g01873	ABRE	ACGTG	1621	5	-	Arabidopsis thaliana	abscisic acid responsiveness
CP_B21g00885	MRE	AACCTAA	622	7	-	Petroselinum crispum	light responsive element
CP_B21g00885	MRE	AACCTAA	656	7	-	Petroselinum crispum	light responsive element
CP_B21g00885	GATA-motif	GATAGGA	523	7	+	Arabidopsis thaliana	light responsive element
CP_B21g00885	TCT-motif	TCTTAC	1275	6	+	Arabidopsis thaliana	light responsive element
CP_B21g00885	GTGGC-motif	CAGCGTGTGGC	376	10	-	Hordeum vulgare	light responsive element
CP_B21g00885	I-box	atGATAAGGTC	1001	10	+	Helianthus annuus	light responsive element
CP_B21g00885	GC-motif	CCCCCG	1812	6	-	Zea mays	anaerobic induction
CP_B21g00885	CAT-box	GCCACT	1478	6	+	Arabidopsis thaliana	meristem expression
CP_B21g00885	LTR	CCGAAA	1234	6	-	Hordeum vulgare	low-temperature responsiveness
CP_B21g00885	LTR	CCGAAA	1767	6	-	Hordeum vulgare	low-temperature responsiveness
CP_B21g00885	GATT-motif	CTCCTGATTGGA	518	11	+	Oryza sativa	light responsive element
CP_B21g00885	Sp1	GGGCGG	1363	6	+	Oryza sativa	light responsive element
CP_B21g00885	GT1-motif	GGTTAA	166	6	-	Arabidopsis thaliana	light responsive element
CP_B21g00885	GT1-motif	GGTTAA	446	6	+	Arabidopsis thaliana	light responsive element
CP_B21g00885	GT1-motif	GGTTAA	448	6	-	Arabidopsis thaliana	light responsive element
CP_B21g00886	TCT-motif	TCTTAC	1096	6	+	Arabidopsis thaliana	light responsive element
CP_B21g00886	GATA-motif	GATAGGA	344	7	+	Arabidopsis thaliana	light responsive element
CP_B21g00886	MRE	AACCTAA	443	7	-	Petroselinum crispum	light responsive element
CP_B21g00886	MRE	AACCTAA	477	7	-	Petroselinum crispum	light responsive element
CP_B21g00886	ABRE	CGCACGTGTC	1905	9	-	Hordeum vulgare	abscisic acid responsiveness
CP_B21g00886	ABRE	CACGTG	1907	6	-	Arabidopsis thaliana	abscisic acid responsiveness
CP_B21g00886	ABRE	ACGTG	1908	5	+	Arabidopsis thaliana	abscisic acid responsiveness
CP_B21g00886	GTGGC-motif	CAGCGTGTGGC	197	10	-	Hordeum vulgare	light responsive element
CP_B21g00886	Sp1	GGGCGG	1184	6	+	Oryza sativa	light responsive element
CP_B21g00886	Sp1	GGGCGG	1912	6	+	Oryza sativa	light responsive element
CP_B21g00886	LTR	CCGAAA	1055	6	-	Hordeum vulgare	low-temperature responsiveness
CP_B21g00886	LTR	CCGAAA	1588	6	-	Hordeum vulgare	low-temperature responsiveness
CP_B21g00886	GATT-motif	CTCCTGATTGGA	339	11	+	Oryza sativa	light responsive element
CP_B21g00886	GT1-motif	GGTTAA	267	6	+	Arabidopsis thaliana	light responsive element
CP_B21g00886	GT1-motif	GGTTAA	269	6	-	Arabidopsis thaliana	light responsive element
CP_B21g00886	TGACG-motif	TGACG	1823	5	+	Hordeum vulgare	MeJA-responsiveness
CP_B21g00886	TGACG-motif	TGACG	1978	5	-	Hordeum vulgare	MeJA-responsiveness
CP_B21g00886	GC-motif	CCCCCG	1633	6	-	Zea mays	anaerobic induction
CP_B21g00886	I-box	atGATAAGGTC	822	10	+	Helianthus annuus	light responsive element
CP_B21g00886	CGTCA-motif	CGTCA	1823	5	-	Hordeum vulgare	MeJA-responsiveness
CP_B21g00886	CGTCA-motif	CGTCA	1978	5	+	Hordeum vulgare	MeJA-responsiveness
CP_B21g00886	G-Box	CACGTG	1907	6	-	Pisum sativum	light responsive element
CP_B21g00886	G-box	CACGTG	1907	6	-	Arabidopsis thaliana	light responsive element
CP_B21g00886	CAT-box	GCCACT	1299	6	+	Arabidopsis thaliana	meristem expression
CP_B21g01266	TCT-motif	TCTTAC	1482	6	+	Arabidopsis thaliana	light responsive element
CP_B21g01266	ARE	AAACCA	1516	6	+	Zea mays	anaerobic induction
CP_B21g01266	ARE	AAACCA	1817	6	-	Zea mays	anaerobic induction
CP_B21g01266	TGACG-motif	TGACG	1806	5	-	Hordeum vulgare	MeJA-responsiveness
CP_B21g01266	TGA-element	AACGAC	1667	6	+	Brassica oleracea	auxin-responsive element
CP_B21g01266	ACE	CTAACGTATT	1328	9	+	Petroselinum crispum	light responsive element
CP_B21g01266	GT1-motif	GGTTAAT	1439	7	+	Avena sativa	light responsive element
CP_B21g01266	GT1-motif	GGTTAAT	1710	7	-	Avena sativa	light responsive element
CP_B21g01266	GT1-motif	GGTTAA	1711	6	-	Arabidopsis thaliana	light responsive element
CP_B21g01266	CGTCA-motif	CGTCA	1806	5	+	Hordeum vulgare	MeJA-responsiveness
CP_B21g01266	GA-motif	ATAGATAA	1284	8	-	Arabidopsis thaliana	light responsive element
CP_B21g01266	AT1-motif	AATTATTTTTTATT	580	13	-	Solanum tuberosum	light responsive element
CP_B21g01266	Box 4	ATTAAT	620	6	+	Petroselinum crispum	light responsive element
CP_B21g01266	Box 4	ATTAAT	1298	6	-	Petroselinum crispum	light responsive element
CP_B21g01266	Box 4	ATTAAT	1586	6	-	Petroselinum crispum	light responsive element
CP_B21g01266	GCN4_motif	TGAGTCA	1839	7	-	Oryza sativa	endosperm expression
CP_B22g00189	ARE	AAACCA	485	6	-	Zea mays	anaerobic induction
CP_B22g00189	ARE	AAACCA	1926	6	-	Zea mays	anaerobic induction
[truncated: 257 more rows]
