# Supplementary material for: Genome-wide characterization and expression profiling of the HD-ZIP gene family in Acoraceae under salinity and cold stress
Source: Front Plant Sci. 2024 Apr 26;15:1372580. doi: 10.3389/fpls.2024.1372580 (PMC11082295; doi:10.3389/fpls.2024.1372580)
Supplement: Supplementary file 5 [file Table_4.xlsx]

## Sheet: Ac. gramineus
ID	AAACCA	AACCTAA	AACGAC	ACGTG	AGAAACAA	ATAGATAA	ATTAAT	CAACTG	CACGTG	CACGTT	CCATCTTTTT	CCCCCG	CCGAAA	CCTTTTG	CGTCA	GATGATGTGG	GCCACT	GGGCGG	GGTCCAT	GGTTAA	TACGTG	TCTCCCT	TCTGTTG	TCTTAC	TGACG	TGAGTCA	TTACTTAA
DACA000653	0	0		1	0	1	3	0	0	1	0	0	1	0	2	1	0	0	0	1	1	0	0	2	0	0	0
DACA000927	3	1		0	0	0	2	1	2	3	0	0	0	0	1	0	0	1	0	0	0	0	1	1	1	0	0
DACA000928	4	0		3	1	0	1	0	1	1	1	1	1	0	0	1	0	0	0	1	0	1	0	1	2	0	0
DACA000929	7	1		1	0	0	1	0	0	2	1	0	0	0	2	0	0	0	0	0	1	1	0	0	2	1	0
DACA001730	2	0		0	1	1	1	0	3	2	0	1	1	0	2	0	1	1	1	1	1	0	1	2	1	0	1
DACA002429	3	1		1	0	0	1	0	1	0	0	0	0	0	0	0	1	0	0	0	1	0	0	0	0	0	0
DACA002672	4	0		0	0	0	2	1	2	5	0	0	0	0	1	1	0	0	0	1	0	1	0	1	1	1	0
DACA004061	6	0		2	1	0	2	2	1	2	1	0	0	0	1	1	0	1	0	2	0	0	0	2	1	0	0
DACA005431	4	0		0	1	1	1	0	0	2	0	0	1	1	1	0	1	0	0	0	1	0	0	0	2	0	0
DACA005525	1	1		1	1	0	2	1	2	1	1	0	0	0	2	1	0	0	1	1	0	1	0	1	1	0	0
DACA006153	2	0		3	0	1	2	0	1	0	0	0	0	0	1	0	0	2	0	0	1	0	0	1	1	0	0
DACA006215	2	1		2	0	0	1	1	1	1	2	0	1	0	3	2	1	1	0	2	0	0	0	2	4	0	0
DACA006650	3	0		2	0	0	1	2	1	0	0	1	1	0	1	0	0	0	0	0	1	1	1	0	0	0	0
DACA006789	4	1		3	0	0	3	0	1	3	1	0	0	1	2	1	0	0	0	1	0	0	0	1	2	0	0
DACA006946	2	0		2	0	0	1	1	3	0	0	0	0	0	3	0	1	1	0	0	1	0	0	0	3	0	0
DACA008364	2	0		1	1	0	2	0	0	2	1	0	1	0	2	1	0	0	0	3	0	0	1	3	2	0	0
DACA008394	4	0		1	0	0	2	3	2	0	0	0	1	0	0	0	0	0	1	0	1	1	1	0	0	0	0
DACA008395	3	0		1	1	0	1	0	1	3	0	0	0	0	1	0	0	1	0	0	0	0	0	0	1	0	0
DACA008865	0	0		2	0	1	1	0	2	2	1	0	1	0	1	1	0	0	0	2	0	0	1	2	1	0	1
DACA008908	7	0		0	0	0	2	2	1	0	0	0	1	0	1	0	1	0	1	0	0	0	0	0	1	0	1
DACA009322	2	1		1	0	0	3	0	0	4	0	0	0	1	1	0	0	0	0	0	0	0	1	0	1	1	0
DACA010840	5	0		2	0	0	3	0	3	1	1	0	0	0	2	1	1	0	0	1	0	0	0	1	2	0	1
DACA012489	1	0		1	1	0	3	1	0	1	0	0	1	1	1	0	0	0	0	0	1	1	1	2	1	0	0
DACA013303	2	1		0	0	0	2	0	1	1	1	1	0	0	1	1	1	0	0	1	0	0	0	1	1	0	0
DACA013364	3	0		1	0	1	3	1	0	0	0	0	0	0	1	0	0	0	0	0	0	0	0	0	1	0	1
DACA013923	2	0		2	0	0	2	0	1	1	0	0	1	0	1	0	1	1	0	0	1	1	0	0	1	1	0
DACA013924	2	0		2	1	0	2	0	2	1	0	0	0	1	2	1	0	0	0	1	0	0	1	1	2	0	0
DACA015341	1	0		1	0	0	1	1	0	1	1	0	0	0	0	0	1	0	0	0	0	0	0	0	0	0	0
DACA015342	1	0		0	0	1	1	0	2	2	0	1	0	0	1	1	0	1	0	0	0	0	0	2	1	0	0
DACA015668	3	0		3	0	0	2	0	0	0	0	0	1	1	0	0	0	1	1	0	0	0	1	0	2	0	1
DACA015960	1	0		1	0	1	1	0	4	1	0	0	0	1	4	1	0	0	0	1	0	0	1	1	2	0	0
DACA016288	3	1		1	0	0	2	1	0	0	0	0	0	1	2	0	0	1	0	0	0	0	0	0	2	0	0
DACA017212	0	1		3	1	0	2	0	2	0	1	0	0	0	2	1	0	0	0	1	0	0	0	1	3	0	0
DACA017378	2	0		0	0	1	2	1	0	1	0	0	1	0	0	0	1	1	0	0	0	1	1	0	0	0	0
DACA017499	2	1		1	0	1	1	0	1	0	1	0	0	0	1	1	0	0	0	1	0	0	0	0	0	0	0
DACA017576	2	2		0	0	1	2	1	1	1	1	1	0	1	1	1	0	1	0	2	1	0	0	1	1	0	1
DACA018089	2	0		1	0	0	2	2	0	0	0	0	1	0	0	0	1	0	0	0	1	1	1	0	1	1	0
DACA018179	2	1		2	0	0	1	1	1	1	1	1	1	1	2	1	0	0	1	1	0	1	0	0	1	0	0
DACA018421	1	0		0	0	0	1	0	0	0	0	0	0	0	0	0	0	0	0	0	0	1	0	0	0	0	1
DACA020351	3	1		1	0	0	2	1	1	1	0	0	0	0	1	0	0	1	0	0	1	0	1	1	1	0	0
DACA020352	1	1		2	1	0	2	0	0	0	1	0	1	0	2	1	0	0	0	0	0	0	0	0	2	1	0
DACA020879	6	0		2	0	1	3	1	1	1	0	1	0	1	1	0	0	0	1	0	0	1	0	0	2	0	0
DACA021755	2	0		3	0	0	4	0	1	0	1	0	0	0	1	1	1	1	0	1	1	0	1	1	3	0	1
DACA022106	0	2		1	0	1	2	1	2	1	1	0	1	0	3	2	0	1	0	2	0	1	0	2	1	1	0
DACA022171	0	1		0	0	0	2	2	1	0	1	1	0	0	1	0	0	0	1	0	0	0	0	0	0	1	0
DACA022464	1	0		1	0	0	2	0	0	0	0	1	0	1	0	0	1	0	1	1	1	1	2	0	1	1	2
DACA023137	2	1		0	1	0	1	1	1	1	1	1	1	0	2	0	0	1	1	0	0	0	1	1	1	0	0
DACA025095	3	0		1	0	0	3	0	1	1	0	0	0	0	1	0	1	0	0	1	0	1	0	1	1	1	0
Total	123	20	16	59	12	13	89	29	51	51	21	11	19	12	60	23	15	18	10	29	16	16	18	35	60	10	11

## Sheet: Ac. calamus
ID	AAACCA	AACCTAA	AACGAC	AAGATAAGATT	AAGGATAAGG	AATCTAATCC	AATTATTTTTTATT	ACGTG	AGAAACAA	AGAAACTT	ATAGATAA	ATTAAT	ATTCTCTAAC	CAAAGATATC	CAAATGAA(A/G)A	CAACTG	CAAT(A/T)ATTG	CACGAC	CACGTC	CACGTG	CACGTT	CATGCATG	CCATCTTTTT	CCCCCG	CCGAAA	CCTTTTG	CGTCA	CTAACGTATT	GATAGGA	GATGA(C/T)(A/G)TG(A/G)	GATGACATGG	GATGATGTGG	GCCACT	GGGCGG	GGTCCAT	GGTTAA	GGTTAAT	GTTTTCTTAC	TACGTG	TATCCCA	TCAGAAGAGG	TCTGTTG	TCTTAC	TGACG	TGAGTCA	TTACTTAA
CP_A01g00952	1	1	0	0	0	0	0	1	0	0	0	1	0	0	0	0	0	0	0	0	0	0	0	0	0	0	0	0	0	0	0	0	0	0	0	0	0	0	0	0	0	0	0	0	0	0
CP_A01g01358	1	1	2	0	0	0	1	5	0	0	0	1	0	0	0	1	0	0	1	5	2	1	0	1	1	1	2	0	0	1	0	1	1	0	0	0	1	1	1	0	0	0	2	1	1	0
CP_A01g02162	7	1	2	0	1	1	0	1	0	0	0	0	0	1	1	0	1	1	0	0	0	0	0	0	0	0	2	1	0	1	1	0	0	1	1	0	2	0	0	0	1	0	0	3	0	0
CP_A01g02553	1	0	1	0	0	0	0	5	0	0	0	1	1	0	0	0	0	0	0	6	0	0	1	0	2	0	1	0	1	0	0	0	0	0	0	0	0	0	1	0	0	0	0	1	0	0
CP_A02g00035	1	1	1	0	0	0	0	9	2	0	0	3	0	0	0	0	0	1	0	3	1	0	0	0	0	0	1	0	0	0	0	0	0	0	0	0	0	0	0	0	0	0	1	1	0	1
CP_A02g00417	1	1	1	0	1	0	0	1	1	1	0	6	0	1	0	1	0	1	2	0	1	0	0	0	1	0	1	0	0	0	0	1	0	2	1	1	1	0	1	1	0	2	2	2	1	0
CP_A02g01535	5	0	1	1	0	0	0	4	0	0	0	5	0	0	0	0	0	0	0	0	0	0	1	0	0	0	1	0	0	0	0	0	0	0	0	0	0	0	0	0	0	0	0	1	0	0
CP_A03g01905	3	1	1	0	0	0	0	4	0	1	0	1	0	0	1	1	0	0	1	2	1	0	1	0	2	0	1	1	0	1	1	0	2	0	0	0	0	0	1	0	0	0	1	0	0	0
CP_A03g02025	2	0	1	0	0	0	1	4	2	0	1	2	0	0	0	1	0	1	1	3	0	0	2	0	2	0	1	0	0	0	0	1	0	1	1	1	2	0	2	0	0	0	2	4	1	0
CP_A03g02029	3	0	1	0	0	0	0	0	1	0	0	2	0	1	0	0	2	1	1	0	0	1	0	1	0	1	1	0	0	0	0	2	0	1	2	0	2	0	0	0	0	1	0	1	0	0
CP_A03g02030	3	0	1	1	0	0	0	1	0	0	0	6	0	0	0	1	0	0	0	0	1	0	0	0	0	0	1	0	1	1	0	0	0	0	0	1	0	0	1	0	0	0	1	1	0	0
CP_A05g01179	3	0	0	0	1	0	1	3	0	1	0	3	0	1	1	0	0	0	1	0	0	0	1	1	2	1	0	0	0	0	1	0	0	1	0	0	1	0	2	0	0	1	2	0	1	1
CP_A05g01681	2	0	2	0	0	0	0	4	0	0	0	2	0	0	0	2	0	0	0	2	0	0	0	0	0	0	2	0	0	0	0	0	0	0	0	1	0	0	0	0	0	0	0	2	0	0
CP_A05g01945	3	0	1	0	0	1	0	0	1	0	0	3	0	1	0	1	0	1	1	0	2	0	1	1	1	0	1	0	0	0	1	1	0	0	1	0	1	0	1	0	0	2	1	1	1	0
CP_A06g00542	1	0	0	0	0	0	0	0	0	0	1	1	0	0	0	0	0	0	0	0	0	0	1	0	1	0	0	0	0	0	0	0	0	0	0	0	0	0	1	0	1	0	0	2	0	0
CP_A06g00690	3	1	1	0	0	0	0	1	0	0	0	3	0	0	0	1	0	0	0	0	0	0	0	0	0	0	1	0	0	0	0	0	0	0	2	1	2	0	0	0	0	1	1	1	2	0
CP_A06g00792	2	0	1	0	0	0	0	1	0	1	0	2	0	0	1	1	0	0	0	0	0	0	1	0	2	0	1	0	0	0	0	0	0	0	0	1	0	0	0	0	0	0	2	2	0	0
CP_A06g00796	3	0	1	1	0	0	0	1	1	0	0	3	0	1	0	0	0	1	1	0	0	0	1	0	0	1	1	2	0	2	1	0	1	2	1	0	1	1	0	1	0	1	0	2	0	0
CP_A06g02002	1	1	0	0	0	0	0	1	0	0	0	1	0	0	0	0	0	0	0	0	1	0	0	0	0	0	0	0	0	0	0	1	0	0	0	0	1	0	2	0	0	0	3	0	1	0
CP_A06g02342	1	1	1	0	0	1	0	4	0	0	0	1	0	0	0	1	0	0	0	0	1	0	0	0	1	0	1	0	0	0	0	0	0	0	1	1	0	0	1	0	0	0	1	1	0	0
CP_A07g00374	3	1	0	1	0	0	1	1	0	0	1	3	1	0	0	0	1	0	0	0	0	2	0	1	0	0	0	0	0	1	1	0	0	0	0	0	0	0	0	0	0	0	0	3	1	0
CP_A07g00385	1	0	2	0	0	0	0	1	0	0	0	1	0	0	0	2	0	0	0	0	0	0	2	0	0	0	2	0	2	0	0	0	1	0	0	2	1	0	0	0	0	0	0	2	1	0
CP_A07g00847	2	0	1	0	1	0	0	2	0	1	0	2	0	0	1	1	1	0	0	0	0	1	0	0	0	0	1	0	0	0	0	1	0	0	1	1	1	0	0	0	0	0	4	1	1	0
CP_A08g00491	3	1	1	1	0	1	0	2	1	0	0	3	0	1	0	1	0	0	2	0	1	0	2	1	0	1	1	0	0	0	0	0	0	0	0	1	0	1	0	1	0	0	0	3	0	1
CP_A08g01689	4	0	1	0	0	0	1	3	0	0	1	4	1	0	0	1	0	0	0	0	0	0	0	0	0	0	1	0	1	0	0	0	0	0	0	1	0	0	0	0	0	0	0	1	1	0
CP_A08g01693	5	0	1	0	0	0	0	2	0	0	0	9	0	0	0	1	0	0	0	0	0	0	0	0	0	0	1	1	0	1	0	0	2	0	1	1	2	0	0	0	0	1	3	1	2	0
CP_A09g00252	4	1	1	1	0	1	1	3	0	0	1	4	1	0	0	1	0	2	0	3	3	1	1	0	1	0	1	1	0	1	0	2	0	2	0	1	0	0	1	0	1	1	1	4	0	0
CP_A09g00253	3	0	2	0	0	0	0	3	0	0	0	3	0	0	0	0	0	0	0	9	0	0	0	0	0	0	2	0	0	0	0	0	0	0	0	0	1	0	0	0	0	0	0	2	1	0
CP_A09g00312	1	0	2	0	0	0	0	4	0	0	0	1	0	0	0	2	1	0	0	2	0	0	0	0	2	0	2	0	0	0	0	0	0	0	0	1	0	0	2	0	0	0	0	2	0	0
CP_A09g00610	2	0	0	1	1	1	1	3	0	1	1	2	1	0	1	0	0	0	0	0	0	0	0	0	0	0	0	0	0	0	0	0	0	0	1	0	1	0	0	0	0	0	0	0	1	0
CP_A09g00712	1	1	2	0	0	0	0	3	0	0	0	1	0	0	0	2	0	1	0	4	1	0	0	0	0	0	2	0	1	0	0	0	0	0	0	2	0	0	0	0	0	0	0	2	0	0
CP_A09g01241	2	1	2	0	0	0	1	1	0	0	1	5	1	0	0	2	0	0	0	0	0	0	0	0	2	0	2	0	0	0	1	0	0	0	1	1	1	0	2	0	0	1	1	2	1	0
CP_A10g00582	1	1	0	1	0	1	0	2	0	0	0	1	0	0	0	0	0	0	0	0	1	0	0	0	0	0	0	0	0	0	0	0	0	0	0	0	0	0	0	0	0	0	0	0	0	0
CP_A10g00662	2	1	2	0	0	0	0	1	0	0	0	2	0	0	0	2	0	0	1	2	1	1	1	1	2	1	2	1	0	1	0	1	0	1	0	1	0	0	2	0	0	0	2	2	0	0
CP_A10g00664	5	0	1	1	0	1	1	2	0	0	1	5	1	0	0	1	0	0	0	1	1	0	0	0	0	0	1	0	0	0	0	0	0	0	0	1	0	0	0	0	0	0	0	1	0	0
CP_A10g00948	1	1	2	0	0	0	0	3	1	0	0	1	0	1	0	2	0	0	0	2	1	0	0	0	0	0	2	0	0	0	0	0	0	0	0	3	0	0	0	0	0	0	0	2	0	0
CP_A10g01204	1	0	0	0	0	0	0	1	0	0	0	4	0	0	0	0	0	0	0	0	0	0	0	0	3	0	0	0	0	0	0	0	0	0	1	0	0	0	3	0	0	1	1	0	0	0
CP_A10g01363	1	0	1	1	1	0	0	1	0	1	0	1	0	0	1	1	0	0	0	6	0	0	0	0	0	0	1	0	0	0	0	0	0	0	0	1	0	0	0	0	1	0	0	1	0	2
CP_A16g00063	4	0	0	0	0	0	0	1	0	0	0	4	0	0	0	0	1	0	0	0	0	0	0	0	0	0	0	0	0	0	0	0	1	0	0	0	0	0	1	0	0	0	1	0	0	0
CP_B04g01969	1	1	2	0	0	0	0	0	1	0	0	1	0	1	0	0	0	1	1	0	1	0	1	0	1	0	2	0	1	0	0	0	0	0	0	0	0	0	1	0	1	0	0	2	0	0
CP_B11g00306	1	0	1	1	0	1	1	1	0	0	1	1	1	0	0	1	0	0	0	1	0	0	0	0	0	0	1	0	0	0	1	0	0	0	0	1	0	0	0	0	0	0	1	1	0	0
CP_B11g00570	2	0	1	0	0	0	0	1	0	0	0	2	0	0	0	1	0	0	0	3	0	0	0	0	0	0	1	0	0	0	0	0	0	0	0	1	0	1	0	1	0	0	0	1	0	0
CP_B11g00571	2	0	1	0	0	0	1	2	0	0	1	2	1	0	0	1	0	0	0	1	0	0	0	0	1	0	1	0	0	0	0	0	0	0	0	1	0	0	0	0	0	0	1	1	0	0
CP_B11g01262	3	0	2	1	0	1	0	2	0	0	0	3	0	1	0	2	0	0	0	2	0	0	0	1	0	1	2	0	0	0	0	0	0	0	0	2	0	0	0	0	1	0	0	2	1	0
CP_B12g00251	2	0	1	0	1	0	0	0	2	1	0	2	0	2	1	1	1	1	1	1	0	1	1	1	2	1	1	1	0	1	1	0	0	0	0	1	0	0	2	0	0	0	1	1	0	0
CP_B12g00461	3	0	2	0	0	0	0	2	0	0	0	3	0	0	0	0	0	0	0	4	0	0	0	0	0	0	2	0	0	0	0	0	0	0	1	0	1	0	0	0	0	1	0	2	0	0
CP_B12g01171	3	1	1	1	0	1	1	3	1	0	1	6	1	1	0	1	0	1	1	1	1	1	1	1	1	1	1	1	2	1	1	0	1	0	0	1	0	1	2	1	0	0	0	1	0	1
CP_B12g01534	4	1	1	0	0	0	0	3	1	0	0	4	0	1	0	1	0	1	1	1	1	0	1	1	1	1	1	0	0	0	1	1	2	1	0	1	0	1	1	1	0	0	1	1	0	0
CP_B12g01611	3	0	2	1	0	1	1	0	0	0	1	3	1	0	0	2	0	0	0	2	0	0	0	0	0	0	2	0	0	0	0	0	0	0	0	2	0	0	0	0	0	0	0	2	0	0
CP_B13g00039	3	1	1	0	0	0	0	3	1	0	0	3	0	1	0	1	0	1	1	1	1	0	1	0	0	0	1	0	0	0	0	0	0	0	0	1	0	0	0	0	0	0	0	1	0	0
CP_B13g00551	5	1	2	1	0	1	1	0	1	0	1	5	1	0	0	2	0	1	1	2	1	0	1	1	1	1	2	0	0	0	1	1	0	1	1	2	1	0	2	0	0	1	1	2	1	0
CP_B13g01720	3	1	1	0	0	0	0	0	1	0	0	3	0	1	0	1	0	1	1	1	1	0	1	1	2	0	1	0	0	0	1	2	1	2	1	1	1	1	1	1	0	1	1	1	1	0
CP_B14g01310	2	0	2	1	0	1	1	3	0	0	1	2	1	0	0	0	0	0	0	2	0	0	0	0	0	0	2	0	0	0	0	0	0	0	0	0	0	0	0	0	0	0	0	2	0	0
CP_B15g00697	3	0	1	0	0	0	0	0	0	0	0	3	0	0	0	1	0	0	0	1	0	0	0	0	0	0	1	0	0	0	0	0	1	0	0	2	0	1	0	1	0	0	0	0	0	0
CP_B15g00698	3	0	1	0	0	0	0	3	0	0	0	3	0	0	0	1	0	0	0	0	0	0	0	0	0	0	1	0	0	0	0	0	0	0	1	0	1	0	0	0	0	1	1	1	1	1
CP_B15g00702	1	1	1	0	0	0	0	3	1	0	0	1	0	1	0	1	0	2	2	1	1	0	2	1	2	1	1	0	0	0	1	0	0	0	0	0	0	0	2	0	0	0	2	0	0	0
CP_B15g00703	3	0	1	0	0	0	0	1	0	0	0	3	0	0	0	1	0	0	0	1	0	0	0	0	0	0	1	0	0	0	0	0	0	0	0	1	1	0	0	0	0	0	0	0	1	0
CP_B15g00859	1	0	1	0	1	0	0	3	0	1	0	3	0	0	1	1	1	0	0	0	1	0	0	0	0	0	1	0	0	0	0	0	0	0	0	1	0	0	0	0	1	0	0	0	0	0
CP_B17g00516	1	1	1	0	0	0	0	1	1	0	0	1	0	1	0	1	0	1	1	1	0	0	1	0	1	0	1	0	0	0	0	1	0	1	1	2	0	0	1	0	0	1	1	1	0	1
CP_B17g00759	2	0	0	0	0	0	0	1	0	0	0	2	0	0	0	0	0	0	0	0	0	0	0	0	0	0	0	1	0	1	0	0	0	0	0	0	0	0	0	0	0	0	0	0	1	0
CP_B17g02220	4	1	1	0	0	0	0	2	1	0	0	4	0	1	0	1	0	1	1	1	2	1	1	1	0	1	1	0	0	0	1	2	1	2	1	1	0	1	1	1	1	1	1	1	0	0
CP_B17g02638	2	0	1	0	0	0	0	1	0	0	0	2	0	0	0	1	0	0	0	1	0	0	0	0	0	0	1	0	0	0	0	0	0	0	0	0	0	0	0	0	0	0	0	1	0	0
CP_B18g01158	4	0	1	0	0	0	0	2	0	0	0	4	0	0	0	1	0	0	0	1	0	0	0	1	2	1	1	0	0	0	1	1	1	1	1	1	1	1	1	0	0	1	1	1	0	0
CP_B18g01335	2	0	2	0	0	0	0	2	0	0	0	2	0	0	0	2	0	0	0	2	0	0	0	0	0	0	2	0	0	0	0	0	0	0	0	0	0	0	0	0	0	0	0	2	0	0
CP_B18g02109	4	0	2	0	0	0	0	0	1	0	0	4	0	1	0	2	0	1	1	4	0	0	1	1	1	1	2	0	0	0	1	1	2	1	1	2	1	1	1	1	1	1	1	2	1	0
CP_B18g02110	2	0	0	0	0	0	0	4	0	0	0	2	0	0	0	0	0	0	0	0	0	0	0	0	0	0	0	0	0	1	0	0	0	0	0	0	1	0	0	0	0	0	0	0	1	0
CP_B19g01374	2	0	2	0	0	0	0	2	1	0	0	2	0	1	0	2	0	1	1	2	1	0	1	1	1	1	2	0	0	0	1	1	1	1	2	3	0	1	1	1	0	2	3	2	0	1
CP_B19g01375	2	0	1	0	1	0	0	1	0	1	0	2	0	0	0	1	1	0	0	1	0	1	0	0	0	0	1	1	1	1	0	0	0	0	0	0	0	0	0	0	0	0	0	1	0	0
CP_B19g01626	1	0	1	0	0	0	0	2	0	0	0	3	0	0	0	1	0	0	0	1	0	0	0	0	0	0	1	0	0	0	0	0	0	0	0	1	1	0	2	0	0	0	1	3	1	0
CP_B19g01720	1	1	2	0	0	0	0	1	0	0	0	1	0	0	1	0	0	0	0	2	0	0	0	0	0	0	2	0	0	0	0	0	0	0	0	0	0	1	0	0	1	0	0	2	0	0
CP_B20g00613	2	0	2	0	0	0	0	1	1	0	0	2	0	1	0	1	0	1	1	4	1	0	1	1	1	1	2	0	0	0	1	1	0	1	1	1	1	0	1	0	0	1	1	2	1	0
CP_B20g01068	1	0	1	0	0	0	0	2	0	0	0	1	0	0	0	1	0	0	0	1	0	0	0	0	0	0	1	0	0	0	0	0	0	0	0	2	0	0	0	0	0	0	0	1	0	0
CP_B20g01155	5	0	1	0	0	0	0	1	0	0	0	5	0	0	0	1	0	0	0	1	0	0	0	0	0	0	1	0	0	0	0	0	0	0	0	1	1	1	0	1	0	0	0	1	1	0
CP_B20g01161	7	0	0	0	0	0	0	0	0	0	0	7	0	0	0	0	0	0	1	0	0	1	1	0	1	0	0	0	0	0	0	0	1	0	0	0	0	1	0	0	0	0	0	0	0	0
CP_B20g01209	1	0	1	0	1	1	0	0	0	1	0	1	0	0	1	1	1	0	0	1	0	0	0	0	0	0	1	0	0	0	0	2	0	2	1	1	1	0	0	0	0	1	0	1	1	0
CP_B20g01408	1	0	1	0	0	0	0	1	0	0	0	1	0	0	0	1	0	0	0	3	0	0	0	0	0	0	1	0	0	0	0	0	0	0	0	0	0	0	0	0	0	0	0	1	0	0
CP_B20g01643	1	0	0	0	0	0	0	1	0	0	0	1	0	0	0	2	0	0	0	0	0	0	0	0	0	0	0	0	0	0	0	0	0	0	1	2	1	0	0	0	0	1	0	0	1	0
CP_B20g01644	1	0	1	0	0	0	0	1	1	0	0	4	0	1	0	1	0	1	1	1	0	0	1	1	0	1	1	0	0	0	1	1	0	1	0	2	0	0	0	0	0	1	0	1	0	1
CP_B20g01873	2	0	1	0	0	0	0	1	0	0	0	1	0	0	0	1	0	0	0	1	1	0	0	0	0	0	1	0	0	0	0	0	0	0	0	1	0	0	1	0	0	0	1	1	0	0
CP_B21g00885	2	0	0	0	0	0	0	1	0	0	0	1	0	0	0	0	0	0	0	0	0	0	0	0	0	0	0	1	0	1	0	0	0	0	0	0	0	0	0	0	0	0	0	0	0	0
CP_B21g00886	1	0	2	0	0	0	1	2	0	0	1	2	1	0	0	0	0	0	0	5	0	0	0	0	0	0	2	0	0	0	0	0	0	0	0	1	0	0	0	0	0	0	0	2	0	0
CP_B21g01266	2	1	2	0	0	0	0	1	0	0	0	2	0	0	0	1	0	0	0	3	1	0	0	0	1	0	2	0	0	0	0	0	2	0	0	1	0	0	0	0	0	0	0	4	0	0
CP_B22g00189	2	1	0	0	0	0	0	2	0	0	0	3	0	0	0	0	0	0	0	0	1	0	0	0	0	0	0	0	0	0	1	0	0	0	0	0	0	2	1	2	1	0	1	2	0	0
CP_B22g00546	1	0	0	0	0	0	0	1	0	0	0	4	0	0	0	0	0	1	1	0	0	0	1	0	1	0	0	0	0	0	0	0	0	0	0	0	1	0	0	0	0	0	0	3	1	0
CP_B22g00547	3	0	1	0	0	0	0	1	0	0	0	4	0	0	0	1	0	0	0	1	0	0	0	0	0	0	1	0	0	0	0	0	0	0	0	1	0	0	0	0	0	0	0	1	0	0
CP_B22g00548	1	0	1	1	0	0	0	0	0	0	0	2	0	0	0	1	0	0	0	1	0	0	0	0	0	0	1	0	0	0	0	2	0	1	2	2	1	0	0	0	0	2	0	2	1	1
CP_B22g00550	4	0	2	0	0	0	0	1	0	0	0	3	0	0	0	2	0	0	0	2	0	0	1	0	1	0	2	0	0	0	0	0	0	0	0	0	0	0	1	0	0	0	3	2	0	0
CP_B22g00551	1	0	1	0	0	0	0	0	0	0	0	1	0	0	0	1	0	0	0	1	0	0	0	1	0	1	1	0	0	0	0	1	0	0	0	1	0	0	0	0	1	1	0	1	0	0
CP_B22g00566	1	0	2	0	0	0	0	1	0	0	0	1	0	0	0	1	0	0	0	4	1	0	1	0	1	0	2	0	0	0	0	0	0	0	0	0	0	0	1	0	0	0	1	5	2	0
CP_B22g00567	1	0	2	0	0	0	0	0	0	0	0	2	0	0	0	0	0	1	1	2	0	0	1	0	0	0	2	0	0	0	0	1	0	1	0	1	0	0	0	0	0	0	0	2	0	0
CP_B22g00843	2	0	0	0	0	0	0	1	0	0	0	4	0	0	0	0	0	0	0	0	0	0	0	0	0	0	0	0	0	0	0	0	0	0	1	0	1	0	0	0	0	0	1	1	0	1
CP_B22g00881	1	1	0	0	0	0	0	0	0	0	0	3	0	0	0	0	0	0	0	0	0	0	0	0	0	0	0	0	0	0	0	0	0	0	0	2	0	0	0	0	0	0	2	0	0	0
Total	211	30	100	17	10	16	16	157	25	11	15	240	14	23	11	77	11	27	30	122	35	12	36	21	47	19	125	12	11	16	21	29	21	27	31	71	37	17	48	14	12	29	59	125	34	12
